# Supplementary material for: Comparative transcriptome and flavonoids components analysis reveal the structural genes responsible for the yellow seed coat color of Brassica rapa L
Source: PeerJ. 2021 Mar 4;9:e10770. doi: 10.7717/peerj.10770 (PMC7937345; doi:10.7717/peerj.10770)
Supplement: Supplemental Information 1 [file peerj-09-10770-s001.xlsx]

## Sheet: Sheet1
Sample Name	Target Name	CT	Target Name	CT	Target Name	CT	Target Name	CT	Target Name	CT	Target Name	CT	Target Name	CT	Target Name	CT	Target Name	CT	Target Name	CT
B147-10	GAPDH	30.5306	CHS	26.9513	CHI	28.2001	TT2	30.6227	DFR	26.9896	BAN	26.8895	TT19	30.6707	TTG1	30.9602	TT8	28.5356	MYB5	28.8093
B147-10	GAPDH	29.8847	CHS	27.2411	CHI	28.9418	TT2	30.3454	DFR	26.9377	BAN	26.7599	TT19	30.3056	TTG1	30.5064	TT8	28.2985	MYB5	29.1333
B147-10	GAPDH	30.0814	CHS	27.0444	CHI	28.4154	TT2	30.3544	DFR	27.083	BAN	27.043	TT19	30.6411	TTG1	30.8366	TT8	28.6322	MYB5	28.9453
B147-14	GAPDH	30.8633	CHS	25.1524	CHI	27.0208	TT2	29.3213	DFR	24.6805	BAN	24.9756	TT19	26.004	TTG1	30.9864	TT8	27.0875	MYB5	30.8866
B147-14	GAPDH	30.6309	CHS	24.906	CHI	26.9887	TT2	29.0232	DFR	24.4916	BAN	25.1362	TT19	26.6476	TTG1	30.925	TT8	26.7773	MYB5	30.7723
B147-14	GAPDH	30.2784	CHS	24.2135	CHI	26.5899	TT2	29.6781	DFR	24.3742	BAN	25.0881	TT19	26.3447	TTG1	30.5375	TT8	27.0489	MYB5	30.397
B147-28	GAPDH	30.0193	CHS	29.015	CHI	31.0247	TT2	32.4567	DFR	27.6588	BAN	29.242	TT19	34.9652	TTG1	29.5425	TT8	30.3175	MYB5	30.9905
B147-28	GAPDH	30.3372	CHS	29.1447	CHI	31.6008	TT2	32.0243	DFR	27.7061	BAN	29.9109	TT19	35.0534	TTG1	29.137	TT8	29.8164	MYB5	30.9769
B147-28	GAPDH	30.1541	CHS	28.6076	CHI	31.0058	TT2	32.8303	DFR	27.275	BAN	29.6744	TT19	34.6106	TTG1	29.1237	TT8	30.1546	MYB5	31.1188
B80-10	GAPDH	31.1041	CHS	29.6144	CHI	32.6785	TT2	29.5954	DFR	35.2317	BAN	35.1258	TT19	30.9561	TTG1	32.7449	TT8	31.7177	MYB5	30.5022
B80-10	GAPDH	30.9804	CHS	29.2724	CHI	32.8682	TT2	29.4366	DFR	35.0906	BAN	35.2168	TT19	30.8654	TTG1	32.6429	TT8	31.894	MYB5	30.6504
B80-10	GAPDH	30.9854	CHS	28.9708	CHI	32.0462	TT2	29.8544	DFR	35.2469	BAN	35.3444	TT19	30.4433	TTG1	32.7775	TT8	31.6542	MYB5	30.7007
B80-14	GAPDH	30.8083	CHS	32.2201	CHI	32.0085	TT2	28.9377	DFR	35.0125	BAN	35.3658	TT19	30.4562	TTG1	34.9806	TT8	34.2248	MYB5	34.8944
B80-14	GAPDH	30.5209	CHS	31.8338	CHI	32.0922	TT2	29.1672	DFR	35.6102	BAN	34.9843	TT19	30.155	TTG1	34.9215	TT8	34.7153	MYB5	34.9875
B80-14	GAPDH	30.116	CHS	31.6967	CHI	32.036	TT2	28.8544	DFR	35.3203	BAN	34.5997	TT19	30.6245	TTG1	34.9541	TT8	34.8288	MYB5	35.0125
B80-28	GAPDH	26.5517	CHS	27.4674	CHI	31.3564	TT2	28.9946	DFR	34.439	BAN	35.2696	TT19	34.2664	TTG1	30.1417	TT8	30.5422	MYB5	32.4945
B80-28	GAPDH	26.4954	CHS	27.4696	CHI	31.6012	TT2	28.8476	DFR	34.271	BAN	35.4196	TT19	34.0214	TTG1	30.2713	TT8	30.8058	MYB5	32.4069
B80-28	GAPDH	26.1157	CHS	27.5879	CHI	31.006	TT2	29.2463	DFR	33.752	BAN	34.952	TT19	34.1609	TTG1	30.2451	TT8	30.2864	MYB5	31.8116
