# Supplementary material for: Comparative transcriptome and flavonoids components analysis reveal the structural genes responsible for the yellow seed coat color of Brassica rapa L
Source: PeerJ. 2021 Mar 4;9:e10770. doi: 10.7717/peerj.10770 (PMC7937345; doi:10.7717/peerj.10770)
Supplement: Supplemental Information 10 [file peerj-09-10770-s010.xlsx]

## Sheet: Sheet1
id	B147-10_fpkm	B80-10_fpkm	log2(FC)	B147-10-vs-B80-10	B147-14_fpkm	B80-14_fpkm	log2(FC)	B147-14-vs-B80-14	B147-28_fpkm	B80-28_fpkm	log2(FC)	B147-28-vs-B80-28	Symbol	Description	KEGG_A_class	KEGG_B_class	Pathway	K_ID	GO Component	GO Function	GO Process
Bra000002	0.346667	0.863333	1.31637	no	1.52	6.17667	2.02276	yes	4	3.58333	-0.158698	no	-	AT2G37460 (E=5e-184) | nodulin MtN21 family protein	-	-	-	-	GO:0016020//membrane;GO:0005575//cellular_component	GO:0003674//molecular_function;GO:0005215//transporter activity	GO:0008150//biological_process;GO:0009987//cellular process;GO:0051179//localization;GO:0006810//transport;GO:0051234//establishment of localization
Bra000014	0.0233333	0.001	-4.54432	no	0.406667	0.001	-8.6677	yes	0.001	0.02	4.32193	no	-	AT2G37700 (E=2e-284) | catalytic/ iron ion binding / oxidoreductase	Metabolism	Lipid metabolism	ko00073//Cutin, suberine and wax biosynthesis	K15404	GO:0005575//cellular_component;GO:0016020//membrane	GO:0003824//catalytic activity;GO:0003674//molecular_function;GO:0005488//binding	GO:0071704//organic substance metabolic process;GO:0009987//cellular process;GO:0044710//single-organism metabolic process;GO:0006629//lipid metabolic process;GO:0044699//single-organism process;GO:0008152//metabolic process;GO:0009058//biosynthetic process;GO:0044238//primary metabolic process;GO:0008150//biological_process
Bra000041	0.001	0.001	0	notest	0.001	0.001	0	notest	3.01	0.001	-11.5555	yes	-	AT2G38180 (E=1e-117) | GDSL-motif lipase/hydrolase family protein	-	-	-	-	-	GO:0016787//hydrolase activity;GO:0003824//catalytic activity;GO:0003674//molecular_function	GO:0044699//single-organism process;GO:0006629//lipid metabolic process;GO:0044238//primary metabolic process;GO:0008150//biological_process;GO:0071704//organic substance metabolic process;GO:0008152//metabolic process;GO:0044710//single-organism metabolic process
Bra000046	7.77667	1.65333	-2.23377	yes	2.99333	0.79	-1.92183	yes	1.62333	0.75	-1.114	no	-	AT2G38250 (E=3e-073) | DNA-binding protein-related	-	-	-	-	GO:0043231//intracellular membrane-bounded organelle;GO:0005622//intracellular;GO:0044464//cell part;GO:0043227//membrane-bounded organelle;GO:0044424//intracellular part;GO:0005634//nucleus;GO:0043229//intracellular organelle;GO:0043226//organelle;GO:0005623//cell;GO:0005575//cellular_component	GO:0003677//DNA binding;GO:0003676//nucleic acid binding;GO:0003674//molecular_function;GO:1901363//heterocyclic compound binding;GO:0044877//macromolecular complex binding;GO:0003682//chromatin binding;GO:0005488//binding;GO:0001071//nucleic acid binding transcription factor activity;GO:0097159//organic cyclic compound binding;GO:0003700//transcription factor activity, sequence-specific DNA bind…	GO:0009058//biosynthetic process;GO:0044237//cellular metabolic process;GO:0006139//nucleobase-containing compound metabolic process;GO:0006725//cellular aromatic compound metabolic process;GO:0046483//heterocycle metabolic process;GO:0071704//organic substance metabolic process;GO:0008152//metabolic process;GO:0008150//biological_process;GO:0006807//nitrogen compound metabolic process;GO:0044238…
Bra000057	9.60333	1.82667	-2.39432	yes	5.19333	1.46667	-1.82412	no	21.4867	6.20667	-1.79155	yes	-	-	-	-	-	-	-	-	-
Bra000058	0.0333333	0.0833333	1.32193	no	0.316667	0.001	-8.30682	no	8.12667	0.146667	-5.79205	yes	-	AT2G38380 (E=6e-160) | peroxidase 22 (PER22) (P22) (PRXEA) / basic peroxidase E	Metabolism	Biosynthesis of other secondary metabolites	ko00940//Phenylpropanoid biosynthesis	K00430	-	GO:0003674//molecular_function;GO:0003824//catalytic activity;GO:0005488//binding	GO:0050896//response to stimulus;GO:0006950//response to stress;GO:0008150//biological_process;GO:0008152//metabolic process
Bra000064	44.5133	16.0467	-1.47196	yes	8.33667	11.9333	0.517455	no	15.5633	4.15667	-1.90465	yes	-	AT2G38470 (E=4e-154) WRKY33, ATWRKY33 | WRKY33; transcription factor	Organismal Systems	Environmental adaptation	ko04626//Plant-pathogen interaction	K13424	-	GO:0003674//molecular_function;GO:0005488//binding;GO:0003677//DNA binding;GO:0003700//transcription factor activity, sequence-specific DNA binding;GO:1901363//heterocyclic compound binding;GO:0003676//nucleic acid binding;GO:0001071//nucleic acid binding transcription factor activity;GO:0097159//organic cyclic compound binding	GO:0006807//nitrogen compound metabolic process;GO:0046483//heterocycle metabolic process;GO:0044238//primary metabolic process;GO:0008152//metabolic process;GO:0006725//cellular aromatic compound metabolic process;GO:0009987//cellular process;GO:0071704//organic substance metabolic process;GO:0034641//cellular nitrogen compound metabolic process;GO:0006139//nucleobase-containing compound metabol…
Bra000090	36.6333	39.0167	0.0909335	no	98.9233	42.7333	-1.21095	yes	0.993333	1.79667	0.854973	no	-	AT2G38750 (E=9e-152) ANNAT4 | ANNAT4 (ANNEXIN ARABIDOPSIS 4); calcium ion binding / calcium-dependent phospholipid binding	-	-	-	-	-	GO:0003674//molecular_function;GO:0005488//binding;GO:0008289//lipid binding	-
Bra000109	46.7867	9.57333	-2.289	yes	0.993333	0.12	-3.04924	no	0.001	0.001	0	notest	-	AT2G38995 (E=2e-193) | FUNCTIONS IN: molecular_function unknown; INVOLVED IN: biological_process unknown; LOCATED IN: cellular_component unknown; CONTAINS InterPro DOMAIN/s: Protein of unknown function DUF1298 (InterPro:IPR009721), Uncharacterised protein family UPF0089 (InterPro:IPR004255); BEST Arabidopsis thaliana protein match is: WSD1; diacylglycerol O-acyltransferase/ long-chain-alcohol O-f…	-	-	-	-	-	GO:0003824//catalytic activity;GO:0003674//molecular_function;GO:0016740//transferase activity	GO:0044710//single-organism metabolic process;GO:0044699//single-organism process;GO:0006629//lipid metabolic process;GO:0071704//organic substance metabolic process;GO:0009058//biosynthetic process;GO:0008152//metabolic process;GO:0044238//primary metabolic process;GO:0008150//biological_process;GO:0009987//cellular process
Bra000124	0.763333	1.49	0.964927	no	0.256667	1.79333	2.80468	yes	32.44	18.17	-0.836215	no	-	AT2G39210 (E=3e-292) | nodulin family protein	-	-	-	-	GO:0016020//membrane;GO:0005575//cellular_component	-	GO:0051179//localization;GO:0051234//establishment of localization;GO:0009987//cellular process;GO:0006810//transport;GO:0008150//biological_process
Bra000129	5.67	2.37667	-1.25441	no	2.51667	1	-1.33151	no	0.001	0.326667	8.35168	yes	-	-	-	-	-	-	-	-	-
Bra000132	14.27	13.4133	-0.0893175	no	43.84	19.3233	-1.1819	no	28.2767	9.78333	-1.53121	yes	-	-	-	-	-	-	-	-	-
Bra000137	1.76333	14.1033	2.99966	yes	0.753333	3.22667	2.09868	no	0.001	0.001	0	notest	-	AT1G73260 (E=7e-037) | trypsin and protease inhibitor family protein / Kunitz family protein	-	-	-	-	-	GO:0003674//molecular_function;GO:0098772//molecular function regulator;GO:0030234//enzyme regulator activity	GO:0019538//protein metabolic process;GO:0008150//biological_process;GO:0044238//primary metabolic process;GO:0009987//cellular process;GO:0043170//macromolecule metabolic process;GO:0008152//metabolic process;GO:0071704//organic substance metabolic process
Bra000142	0.313333	0.45	0.522227	no	3.77667	6.10667	0.693272	no	3.26333	0.7	-2.22092	yes	-	AT2G39700 (E=4e-087) ATEXPA4, ATEXP4, ATHEXP ALPHA 1.6 | ATEXPA4 (ARABIDOPSIS THALIANA EXPANSIN A4)	-	-	-	-	GO:0005576//extracellular region;GO:0005575//cellular_component	-	GO:0009987//cellular process;GO:0016043//cellular component organization;GO:0008150//biological_process;GO:0071840//cellular component organization or biogenesis
Bra000152	0.176667	0.203333	0.202817	no	0.176667	0.103333	-0.773724	no	0.19	1.10667	2.54215	yes	-	AT2G39830 (E=6e-267) DAR2 | DAR2 (DA1-RELATED PROTEIN 2); zinc ion binding	-	-	-	-	-	GO:0003674//molecular_function;GO:0005488//binding	-
Bra000161	37.6267	15.0067	-1.32615	yes	27.8067	16.03	-0.794656	no	4.86667	1.95667	-1.31454	no	-	AT2G40020 (E=4e-008) | FUNCTIONS IN: molecular_function unknown; INVOLVED IN: biological_process unknown; LOCATED IN: cellular_component unknown; EXPRESSED IN: 22 plant structures; EXPRESSED DURING: 13 growth stages; CONTAINS InterPro DOMAIN/s: WIYLD domain (InterPro:IPR018848); BEST Arabidopsis thaliana protein match is: unknown protein (TAIR:AT1G45248.5); Has 5859 Blast hits to 3090 proteins in…	-	-	-	-	-	GO:0016740//transferase activity;GO:0003824//catalytic activity;GO:0003674//molecular_function	GO:0044237//cellular metabolic process;GO:0044260//cellular macromolecule metabolic process;GO:0019538//protein metabolic process;GO:0036211//protein modification process;GO:0009987//cellular process;GO:0016043//cellular component organization;GO:0044238//primary metabolic process;GO:0008150//biological_process;GO:0071840//cellular component organization or biogenesis;GO:0006464//cellular protein…
Bra000195	46.5333	23.4267	-0.990113	no	105.767	36.9633	-1.51672	yes	4.20667	4.74	0.17221	no	-	AT2G40620 (E=3e-085) | bZIP transcription factor family protein	-	-	-	-	-	GO:0005488//binding;GO:0003677//DNA binding;GO:0003674//molecular_function;GO:0003700//transcription factor activity, sequence-specific DNA binding;GO:1901363//heterocyclic compound binding;GO:0097159//organic cyclic compound binding;GO:0003676//nucleic acid binding;GO:0001071//nucleic acid binding transcription factor activity	GO:0008152//metabolic process;GO:0006725//cellular aromatic compound metabolic process;GO:0046483//heterocycle metabolic process;GO:0034641//cellular nitrogen compound metabolic process;GO:0009987//cellular process;GO:0044238//primary metabolic process;GO:0006139//nucleobase-containing compound metabolic process;GO:0044237//cellular metabolic process;GO:0008150//biological_process;GO:1901360//org…
Bra000205	2.14667	0.55	-1.96459	yes	0.04	0.0666667	0.736966	no	0.001	0.001	0	notest	-	AT2G40815 (E=9e-050) | FUNCTIONS IN: molecular_function unknown; INVOLVED IN: biological_process unknown; LOCATED IN: cellular_component unknown; CONTAINS InterPro DOMAIN/s: C2 calcium-dependent membrane targeting (InterPro:IPR000008).	-	-	-	-	-	GO:0003674//molecular_function;GO:0005515//protein binding;GO:0005488//binding	-
Bra000223	0.236667	0.206667	-0.195551	no	0.663333	0.183333	-1.85526	no	0.0633333	1.09667	4.11402	yes	-	AT2G41300 (E=7e-173) | strictosidine synthase	-	-	-	-	-	GO:0003674//molecular_function;GO:0003824//catalytic activity	GO:0008150//biological_process;GO:0008152//metabolic process;GO:0009058//biosynthetic process
Bra000265	11.6333	1.25333	-3.21442	yes	3.66333	1.27	-1.52833	no	0.263333	0.35	0.410465	no	-	-	-	-	-	-	-	-	-
Bra000267	5.94667	2.40333	-1.30704	yes	2.69667	1.90333	-0.502649	no	2.72333	1.90333	-0.516845	no	-	AT2G42580 (E=2e-297) TTL3, VIT | TTL3 (TETRATRICOPETIDE-REPEAT THIOREDOXIN-LIKE 3); binding / protein binding	-	-	-	-	-	GO:0005515//protein binding;GO:0003674//molecular_function;GO:0005488//binding	GO:0065007//biological regulation;GO:0008150//biological_process;GO:0019725//cellular homeostasis;GO:0065008//regulation of biological quality;GO:0044699//single-organism process;GO:0044763//single-organism cellular process;GO:0009987//cellular process;GO:0042592//homeostatic process
Bra000269	0.001	0.001	0	notest	0.001	0.196667	7.61961	no	0.753333	0.001	-9.55714	yes	-	-	-	-	-	-	-	-	-
Bra000309	0.001	0.001	0	notest	0.001	0.001	0	notest	3.8	12.6833	1.73886	yes	-	AT2G43520 (E=4e-031) ATTI2 | ATTI2; serine-type endopeptidase inhibitor	-	-	-	-	GO:0005575//cellular_component;GO:0005576//extracellular region	GO:0003674//molecular_function	GO:0008150//biological_process;GO:0006950//response to stress;GO:0050896//response to stimulus
Bra000310	0.616667	4.53	2.87695	yes	3.8	5.80667	0.611711	no	1.39333	0.29	-2.26442	no	-	AT2G43570 (E=5e-106) | chitinase, putative	Metabolism	Carbohydrate metabolism	ko00520//Amino sugar and nucleotide sugar metabolism	K01183	-	GO:0003824//catalytic activity;GO:0003674//molecular_function;GO:0005488//binding;GO:0016787//hydrolase activity	GO:0009987//cellular process;GO:0071704//organic substance metabolic process;GO:0009056//catabolic process;GO:0005975//carbohydrate metabolic process;GO:0008152//metabolic process;GO:0008150//biological_process;GO:0044238//primary metabolic process
Bra000311	0.05	0.216667	2.11548	no	0.316667	0.15	-1.078	no	169.543	18.15	-3.22361	yes	-	AT2G43590 (E=3e-127) | chitinase, putative	Metabolism	Carbohydrate metabolism	ko00520//Amino sugar and nucleotide sugar metabolism	K01183	-	GO:0003824//catalytic activity;GO:0005488//binding;GO:0003674//molecular_function;GO:0016787//hydrolase activity	GO:0008152//metabolic process;GO:0071704//organic substance metabolic process;GO:0008150//biological_process;GO:0009056//catabolic process;GO:0044238//primary metabolic process;GO:0009987//cellular process;GO:0005975//carbohydrate metabolic process
Bra000315	0.283333	0.376667	0.410788	no	1.22333	0.673333	-0.861425	no	1.00333	0.0933333	-3.42626	yes	-	AT2G43620 (E=8e-128) | chitinase, putative	Metabolism	Carbohydrate metabolism	ko00520//Amino sugar and nucleotide sugar metabolism	K01183	-	GO:0016787//hydrolase activity;GO:0003674//molecular_function;GO:0005488//binding;GO:0003824//catalytic activity	GO:0071704//organic substance metabolic process;GO:0008152//metabolic process;GO:0044238//primary metabolic process;GO:0008150//biological_process;GO:0005975//carbohydrate metabolic process;GO:0009056//catabolic process;GO:0009987//cellular process
Bra000321	85.3667	95.9367	0.168409	no	401.343	384.823	-0.0606407	no	571.05	148.907	-1.93921	yes	-	AT2G43710 (E=3e-216) SSI2, FAB2 | SSI2; acyl-[acyl-carrier-protein] desaturase/ stearoyl-CoA 9-desaturase	Metabolism	Global and Overview;Lipid metabolism	ko01212//Fatty acid metabolism;ko01040//Biosynthesis of unsaturated fatty acids;ko00061//Fatty acid biosynthesis	K03921	GO:0043226//organelle;GO:0043231//intracellular membrane-bounded organelle;GO:0009536//plastid;GO:0005623//cell;GO:0005575//cellular_component;GO:0043227//membrane-bounded organelle;GO:0005737//cytoplasm;GO:0044464//cell part;GO:0044424//intracellular part;GO:0044444//cytoplasmic part;GO:0005622//intracellular;GO:0043229//intracellular organelle	GO:0005488//binding;GO:0003824//catalytic activity;GO:0003674//molecular_function	GO:0044238//primary metabolic process;GO:0009058//biosynthetic process;GO:0006629//lipid metabolic process;GO:0071704//organic substance metabolic process;GO:0008152//metabolic process;GO:0044699//single-organism process;GO:0009987//cellular process;GO:0044710//single-organism metabolic process;GO:0008150//biological_process
Bra000332	0.07	0.333333	2.25154	no	2.61333	9.71	1.89358	yes	0.356667	0.07	-2.34915	no	-	AT2G43870 (E=1e-209) | polygalacturonase, putative / pectinase, putative	Metabolism	Carbohydrate metabolism	ko00500//Starch and sucrose metabolism;ko00040//Pentose and glucuronate interconversions	K01184	GO:0005575//cellular_component;GO:0005576//extracellular region	GO:0003824//catalytic activity;GO:0016787//hydrolase activity;GO:0003674//molecular_function	GO:0009987//cellular process;GO:0044238//primary metabolic process;GO:0005975//carbohydrate metabolic process;GO:0016043//cellular component organization;GO:0071704//organic substance metabolic process;GO:0008152//metabolic process;GO:0071840//cellular component organization or biogenesis;GO:0008150//biological_process
Bra000340	0.376667	0.106667	-1.82018	no	0.001	0.08	6.32193	no	1.43	0.001	-10.4818	yes	-	-	-	-	-	-	-	-	-
Bra000348	0.0366667	0.0266667	-0.459432	no	0.0466667	0.103333	1.14684	no	2.02667	0.833333	-1.28214	yes	-	-	-	-	-	-	-	-	-
Bra000364	163.86	182.33	0.154088	no	149.277	66.79	-1.16028	yes	1.01333	1.30667	0.366782	no	-	AT2G44790 (E=2e-032) UCC2 | UCC2 (UCLACYANIN 2); copper ion binding / electron carrier	-	-	-	-	-	GO:0005488//binding;GO:0003674//molecular_function	-
Bra000369	1.67333	0.001	-10.7085	yes	0.153333	0.05	-1.61667	no	0.176667	0.193333	0.130061	no	-	AT2G45080 (E=2e-117) cycp3;1 | cycp3;1 (cyclin p3;1); cyclin-dependent protein kinase	-	-	-	-	-	GO:0003674//molecular_function;GO:0005488//binding;GO:0005515//protein binding	GO:0044699//single-organism process;GO:0009987//cellular process;GO:0006464//cellular protein modification process;GO:0008150//biological_process;GO:0044237//cellular metabolic process;GO:0044763//single-organism cellular process;GO:0044238//primary metabolic process;GO:0007049//cell cycle;GO:0019538//protein metabolic process;GO:0008152//metabolic process;GO:0044260//cellular macromolecule metab…
Bra000377	1.53667	0.113333	-3.76116	no	0.346667	0.106667	-1.70044	no	7.36667	0.77	-3.25808	yes	-	AT2G45180 (E=3e-041) | protease inhibitor/seed storage/lipid transfer protein (LTP) family protein	-	-	-	-	GO:0005623//cell;GO:0043227//membrane-bounded organelle;GO:0009536//plastid;GO:0009579//thylakoid;GO:0043226//organelle;GO:0044464//cell part;GO:0016020//membrane;GO:0005737//cytoplasm;GO:0044444//cytoplasmic part;GO:0043229//intracellular organelle;GO:0005575//cellular_component;GO:0044424//intracellular part;GO:0043231//intracellular membrane-bounded organelle;GO:0005622//intracellular	-	GO:0044699//single-organism process;GO:0044707//single-multicellular organism process;GO:0044710//single-organism metabolic process;GO:0044238//primary metabolic process;GO:0071704//organic substance metabolic process;GO:0009987//cellular process;GO:0007275//multicellular organism development;GO:0032501//multicellular organismal process;GO:0006629//lipid metabolic process;GO:0044767//single-organ…
Bra000397	19.64	7.9	-1.31387	yes	10.04	13.3167	0.407474	no	12.61	12.39	-0.0253921	no	-	AT2G45695 (E=8e-040) | FUNCTIONS IN: molecular_function unknown; INVOLVED IN: biological_process unknown; LOCATED IN: cellular_component unknown; CONTAINS InterPro DOMAIN/s: Ubiquitin related modifier 1 (InterPro:IPR015221), Ubiquitin-related modifier 1 (InterPro:IPR017188), Molybdopterin synthase/thiamin biosynthesis sulphur carrier, beta-grasp (InterPro:IPR016155); BEST Arabidopsis thaliana pro…	Genetic Information Processing	Folding, sorting and degradation	ko04122//Sulfur relay system	K12161	GO:0005622//intracellular;GO:0005623//cell;GO:0005575//cellular_component;GO:0005829//cytosol;GO:0044464//cell part;GO:0005737//cytoplasm;GO:0044424//intracellular part;GO:0044444//cytoplasmic part	-	GO:0006807//nitrogen compound metabolic process;GO:0044238//primary metabolic process;GO:0006139//nucleobase-containing compound metabolic process;GO:0009987//cellular process;GO:0044267//cellular protein metabolic process;GO:0044237//cellular metabolic process;GO:0071704//organic substance metabolic process;GO:0044260//cellular macromolecule metabolic process;GO:0036211//protein modification pro…
Bra000406	14.5833	10.71	-0.445362	no	22.5833	8.33333	-1.43829	yes	4.74	3.11667	-0.604883	no	-	-	-	-	-	-	-	-	-
Bra000410	31.7767	17.2667	-0.879978	no	21.5333	19.2633	-0.160714	no	19.04	8.47667	-1.16746	yes	-	AT2G46030 (E=4e-084) UBC6 | UBC6 (ubiquitin-conjugating enzyme 6); ubiquitin-protein ligase	Genetic Information Processing	Folding, sorting and degradation	ko04120//Ubiquitin mediated proteolysis	K10576	-	GO:0003674//molecular_function;GO:0003824//catalytic activity	-
Bra000430	11.1733	8.09	-0.465848	no	6.71	9.89	0.559658	no	2.65	0.206667	-3.68061	yes	-	AT2G46600 (E=2e-058) | calcium-binding protein, putative	-	-	-	-	-	GO:0005488//binding;GO:0003674//molecular_function	-
Bra000460	64.17	34.16	-0.909591	no	136.83	89.7433	-0.608508	no	16.6867	6.86333	-1.28171	yes	-	AT2G47730 (E=1e-102) ATGSTF8, ATGSTF5, GST6, GSTF8 | ATGSTF8 (ARABIDOPSIS THALIANA GLUTATHIONE S-TRANSFERASE PHI 8); glutathione binding / glutathione transferase	Metabolism	Metabolism of other amino acids	ko00480//Glutathione metabolism	K00799	-	GO:0005488//binding;GO:0005515//protein binding;GO:0003674//molecular_function	-
Bra000461	0.526667	0.68	0.368645	no	4.5	2.64333	-0.767567	no	11.7367	4.06667	-1.5291	yes	-	AT4G22100 (E=1e-221) BGLU3 | BGLU3 (BETA GLUCOSIDASE 2); catalytic/ cation binding / hydrolase, hydrolyzing O-glycosyl compounds	Metabolism	Carbohydrate metabolism;Metabolism of other amino acids;Biosynthesis of other secondary metabolites	ko00500//Starch and sucrose metabolism;ko00940//Phenylpropanoid biosynthesis;ko00460//Cyanoamino acid metabolism	K01188	GO:0005622//intracellular;GO:0044424//intracellular part;GO:0044464//cell part;GO:0005737//cytoplasm;GO:0005783//endoplasmic reticulum;GO:0043231//intracellular membrane-bounded organelle;GO:0043229//intracellular organelle;GO:0005575//cellular_component;GO:0044444//cytoplasmic part;GO:0016020//membrane;GO:0012505//endomembrane system;GO:0005623//cell;GO:0043227//membrane-bounded organelle;GO:004…	GO:0003674//molecular_function;GO:0003824//catalytic activity;GO:0016740//transferase activity;GO:0016787//hydrolase activity	GO:0071704//organic substance metabolic process;GO:0005975//carbohydrate metabolic process;GO:0008150//biological_process;GO:0044238//primary metabolic process;GO:0008152//metabolic process
Bra000469	0.736667	2.62	1.83048	yes	1.79667	1.35333	-0.408806	no	9.77667	3.66667	-1.41487	yes	-	AT2G29940 (E=0.0) PDR3, ATPDR3 | PDR3 (PLEIOTROPIC DRUG RESISTANCE 3); ATPase, coupled to transmembrane movement of substances	-	-	-	-	GO:0005575//cellular_component;GO:0016020//membrane	GO:0003674//molecular_function;GO:0000166//nucleotide binding;GO:0003824//catalytic activity;GO:1901265//nucleoside phosphate binding;GO:0005488//binding;GO:0036094//small molecule binding;GO:1901363//heterocyclic compound binding;GO:0097159//organic cyclic compound binding;GO:0016787//hydrolase activity	-
Bra000474	268.88	99.0867	-1.4402	yes	115.003	111.653	-0.0426494	no	88.5167	32.42	-1.44907	yes	-	AT2G29450 (E=7e-115) ATGSTU5, ATGSTU1, AT103-1A | ATGSTU5 (ARABIDOPSIS THALIANA GLUTATHIONE S-TRANSFERASE TAU 5); glutathione binding / glutathione transferase	Metabolism	Metabolism of other amino acids	ko00480//Glutathione metabolism	K00799	-	GO:0005488//binding;GO:0003674//molecular_function;GO:0005515//protein binding	-
Bra000476	0.766667	1.01333	0.402437	no	0.4	1.01667	1.34577	no	3.72	1.16667	-1.67291	yes	-	AT2G29340 (E=2e-124) | short-chain dehydrogenase/reductase (SDR) family protein	Metabolism	Biosynthesis of other secondary metabolites	ko00960//Tropane, piperidine and pyridine alkaloid biosynthesis	K08081	-	GO:0003824//catalytic activity;GO:0003674//molecular_function	GO:0008150//biological_process;GO:0008152//metabolic process
Bra000477	0.386667	0.51	0.399407	no	2.87	0.656667	-2.12782	no	2.71667	0.43	-2.65943	yes	-	AT2G29310 (E=5e-131) | tropinone reductase, putative / tropine dehydrogenase, putative	Metabolism	Biosynthesis of other secondary metabolites	ko00960//Tropane, piperidine and pyridine alkaloid biosynthesis	K08081	-	GO:0003824//catalytic activity;GO:0003674//molecular_function	GO:0008150//biological_process;GO:0008152//metabolic process
Bra000480	63.8467	61.4167	-0.0559811	no	81.6767	95.3833	0.223813	no	22.7633	10.0633	-1.1776	yes	-	AT2G28840 (E=3e-182) | ankyrin repeat family protein	-	-	-	-	-	GO:0005488//binding;GO:0003674//molecular_function;GO:0005515//protein binding	-
Bra000508	22.9833	60.6467	1.39984	yes	21.7967	20.8467	-0.0642908	no	33.64	40.3733	0.263225	no	-	AT2G27500 (E=4e-195) | glycosyl hydrolase family 17 protein	-	-	-	-	-	GO:0003824//catalytic activity;GO:0003674//molecular_function;GO:0016787//hydrolase activity	GO:0008150//biological_process;GO:0008152//metabolic process;GO:0071704//organic substance metabolic process;GO:0005975//carbohydrate metabolic process;GO:0044238//primary metabolic process
Bra000511	0.556667	0.28	-0.991387	no	1.38667	1.84667	0.413302	no	0.0333333	0.523333	3.97269	yes	-	AT2G27430 (E=1e-092) | binding	-	-	-	-	-	GO:0003674//molecular_function;GO:0005488//binding	-
Bra000514	0.35	0.0233333	-3.90689	yes	0.001	0.001	0	notest	0.001	0.001	0	notest	-	AT1G46984 (E=2e-094) | F-box protein-related	-	-	-	-	-	GO:0003674//molecular_function;GO:0005515//protein binding;GO:0005488//binding	-
Bra000523	1.51	0.37	-2.02895	no	1.05333	0.673333	-0.645569	no	4.43667	13.5767	1.61358	yes	-	-	-	-	-	-	-	-	-
Bra000553	0.386667	0.373333	-0.0506261	no	0.676667	0.44	-0.620942	no	4.97667	1.59333	-1.64313	yes	-	AT2G25737 (E=4e-178) | unknown protein	-	-	-	-	GO:0005575//cellular_component;GO:0016020//membrane	-	-
Bra000557	84.11	25.9867	-1.69451	yes	95.8533	43.6433	-1.13507	no	11.2633	4.16333	-1.43582	no	ATHSFA2	AT2G26150 (E=2e-155) ATHSFA2, HSFA2 | ATHSFA2; DNA binding / transcription factor	-	-	-	-	GO:0043229//intracellular organelle;GO:0044464//cell part;GO:0043231//intracellular membrane-bounded organelle;GO:0044424//intracellular part;GO:0043226//organelle;GO:0005623//cell;GO:0005575//cellular_component;GO:0005622//intracellular;GO:0005634//nucleus;GO:0043227//membrane-bounded organelle	GO:0001071//nucleic acid binding transcription factor activity;GO:0003700//transcription factor activity, sequence-specific DNA binding;GO:0003677//DNA binding;GO:0003676//nucleic acid binding;GO:0005488//binding;GO:1901363//heterocyclic compound binding;GO:0003674//molecular_function;GO:0097159//organic cyclic compound binding	GO:0019748//secondary metabolic process;GO:0044710//single-organism metabolic process;GO:0044238//primary metabolic process;GO:0009628//response to abiotic stimulus;GO:0071704//organic substance metabolic process;GO:0006950//response to stress;GO:0008152//metabolic process;GO:0050896//response to stimulus;GO:0034641//cellular nitrogen compound metabolic process;GO:0006725//cellular aromatic compo…
Bra000584	0.113333	0.223333	0.978626	no	1.29333	5.54333	2.09966	yes	8.68	6.24667	-0.474608	no	-	AT2G21050 (E=2e-259) | amino acid permease, putative	Environmental Information Processing	Signal transduction	ko04075//Plant hormone signal transduction	K13946	GO:0005575//cellular_component;GO:0016020//membrane	-	-
Bra000615	1568.69	2568.01	0.711087	no	679.147	1625.8	1.25935	yes	170.923	82.8333	-1.04507	yes	-	AT5G50260 (E=4e-183) | cysteine proteinase, putative	-	-	-	-	GO:0005773//vacuole;GO:0044464//cell part;GO:0044444//cytoplasmic part;GO:0044424//intracellular part;GO:0005737//cytoplasm;GO:0043226//organelle;GO:0071944//cell periphery;GO:0043227//membrane-bounded organelle;GO:0030312//external encapsulating structure;GO:0005618//cell wall;GO:0005575//cellular_component;GO:0005623//cell;GO:0043229//intracellular organelle;GO:0043231//intracellular membrane-b…	GO:0003674//molecular_function;GO:0003824//catalytic activity;GO:0016787//hydrolase activity	GO:0030154//cell differentiation;GO:0009791//post-embryonic development;GO:0009987//cellular process;GO:0007275//multicellular organism development;GO:0032502//developmental process;GO:0003006//developmental process involved in reproduction;GO:0009908//flower development;GO:0044702//single organism reproductive process;GO:0048608//reproductive structure development;GO:0008219//cell death;GO:00905…
Bra000628	215.94	527.117	1.28749	yes	776.317	555.903	-0.481811	no	85.1033	13.4	-2.66698	yes	RGP4	AT5G50750 (E=2e-209) RGP4 | RGP4 (REVERSIBLY GLYCOSYLATED POLYPEPTIDE 4); transferase, transferring hexosyl groups	Metabolism	Carbohydrate metabolism	ko00520//Amino sugar and nucleotide sugar metabolism	K13379	GO:0005829//cytosol;GO:0005794//Golgi apparatus;GO:0043231//intracellular membrane-bounded organelle;GO:0005623//cell;GO:0044444//cytoplasmic part;GO:0043226//organelle;GO:0044464//cell part;GO:0005737//cytoplasm;GO:0005622//intracellular;GO:0044424//intracellular part;GO:0043227//membrane-bounded organelle;GO:0012505//endomembrane system;GO:0005575//cellular_component;GO:0043229//intracellular o…	GO:0003824//catalytic activity;GO:0003674//molecular_function	GO:0071704//organic substance metabolic process;GO:0009058//biosynthetic process;GO:0005975//carbohydrate metabolic process;GO:0044238//primary metabolic process;GO:0008150//biological_process;GO:0009987//cellular process;GO:0008152//metabolic process
Bra000630	44.6967	6.49	-2.78388	yes	132.47	11.7233	-3.49821	yes	5.52667	1.93333	-1.51532	no	-	AT2G23580 (E=4e-112) ATMES4, MES4, ABE4 | MES4 (METHYL ESTERASE 4); hydrolase/ hydrolase, acting on ester bonds / methyl salicylate esterase	-	-	-	-	-	GO:0003824//catalytic activity;GO:0003674//molecular_function;GO:0016787//hydrolase activity	GO:0009607//response to biotic stimulus;GO:0006950//response to stress;GO:0009987//cellular process;GO:0008150//biological_process;GO:0008152//metabolic process;GO:0009605//response to external stimulus;GO:0050896//response to stimulus
Bra000631	0.863333	0.001	-9.75377	yes	9.58	0.38	-4.65595	yes	53.4	0.226667	-7.88012	yes	-	-	-	-	-	-	-	-	-
Bra000638	0.0366667	0.001	-5.1964	no	0.12	1.17	3.2854	yes	1.01333	0.373333	-1.44057	no	KNAT1	AT4G08150 (E=9e-163) KNAT1, BP, BP1 | KNAT1 (KNOTTED-LIKE FROM ARABIDOPSIS THALIANA); transcription factor	-	-	-	-	GO:0043226//organelle;GO:0043231//intracellular membrane-bounded organelle;GO:0005623//cell;GO:0005622//intracellular;GO:0044464//cell part;GO:0043227//membrane-bounded organelle;GO:0044424//intracellular part;GO:0005634//nucleus;GO:0005575//cellular_component;GO:0043229//intracellular organelle	GO:0003674//molecular_function;GO:0003677//DNA binding;GO:0005488//binding;GO:0003700//transcription factor activity, sequence-specific DNA binding;GO:0003676//nucleic acid binding;GO:1901363//heterocyclic compound binding;GO:0097159//organic cyclic compound binding;GO:0001071//nucleic acid binding transcription factor activity	GO:0022414//reproductive process;GO:0090567//reproductive shoot system development;GO:0032502//developmental process;GO:0048856//anatomical structure development;GO:0000003//reproduction;GO:0034641//cellular nitrogen compound metabolic process;GO:0044699//single-organism process;GO:0006725//cellular aromatic compound metabolic process;GO:0044707//single-multicellular organism process;GO:0046483//…
Bra000639	51.76	39.7067	-0.382456	no	71.5833	31.66	-1.17696	yes	11.7533	9.58667	-0.293969	no	-	AT4G08180 (E=0.0) ORP1C | ORP1C (OSBP(OXYSTEROL BINDING PROTEIN)-RELATED PROTEIN 1C); oxysterol binding / phosphoinositide binding	-	-	-	-	-	GO:0003674//molecular_function;GO:0005488//binding;GO:0008289//lipid binding	-
Bra000643	15.7233	5.01667	-1.64811	yes	3.47	3.97667	0.196624	no	0.64	0.123333	-2.37551	no	-	AT4G08230 (E=4e-038) | glycine-rich protein	-	-	-	-	-	-	GO:0044699//single-organism process;GO:0050896//response to stimulus;GO:0008150//biological_process;GO:0050789//regulation of biological process;GO:0044763//single-organism cellular process;GO:0023052//signaling;GO:0044700//single organism signaling;GO:0007154//cell communication;GO:0051716//cellular response to stimulus;GO:0065007//biological regulation;GO:0007165//signal transduction;GO:0009987…
Bra000668	8.13	13.6267	0.745105	no	7.07	0.786667	-3.16789	yes	0.243333	0.001	-7.92679	no	-	AT4G38940 (E=1e-055) | kelch repeat-containing F-box family protein	-	-	-	-	-	GO:0005488//binding;GO:0003674//molecular_function;GO:0005515//protein binding	-
Bra000686	2.7	0.793333	-1.76696	yes	1.88667	0.94	-1.00511	no	0.746667	0.6	-0.315502	no	-	AT1G34300 (E=3e-254) | lectin protein kinase family protein	-	-	-	-	-	GO:0016740//transferase activity;GO:0036094//small molecule binding;GO:0005488//binding;GO:1901363//heterocyclic compound binding;GO:0000166//nucleotide binding;GO:0016301//kinase activity;GO:0003824//catalytic activity;GO:1901265//nucleoside phosphate binding;GO:0097159//organic cyclic compound binding;GO:0016772//transferase activity, transferring phosphorus-containing groups;GO:0003674//molecu…	GO:0044702//single organism reproductive process;GO:0044238//primary metabolic process;GO:0044703//multi-organism reproductive process;GO:0044237//cellular metabolic process;GO:0000003//reproduction;GO:0043170//macromolecule metabolic process;GO:0044763//single-organism cellular process;GO:0007154//cell communication;GO:0009856//pollination;GO:0044706//multi-multicellular organism process;GO:0071…
Bra000688	33.7767	48.7367	0.528981	no	112.143	52.5367	-1.09395	yes	25.47	36.02	0.499999	no	-	AT4G09670 (E=7e-189) | oxidoreductase family protein	-	-	-	-	-	GO:0003824//catalytic activity;GO:0003674//molecular_function	GO:0008150//biological_process;GO:0008152//metabolic process
Bra000710	0.266667	0.353333	0.405992	no	0.33	0.57	0.788496	no	5.64333	2.22	-1.34599	yes	-	AT4G10380 (E=2e-134) NIP5;1, NLM6, NLM8 | NIP5;1; arsenite transmembrane transporter/ boron transporter/ water channel	-	-	-	-	GO:0005575//cellular_component;GO:0016020//membrane	GO:0003674//molecular_function;GO:0005215//transporter activity	GO:0006810//transport;GO:0051179//localization;GO:0051234//establishment of localization;GO:0008150//biological_process
Bra000716	0.633333	2.18667	1.7877	yes	4.54667	4.59	0.0136849	no	0.283333	0.0333333	-3.08746	no	-	AT1G32760 (E=8e-084) | glutaredoxin family protein	-	-	-	-	-	GO:0003674//molecular_function;GO:0003824//catalytic activity	GO:0019725//cellular homeostasis;GO:0044699//single-organism process;GO:0044763//single-organism cellular process;GO:0009987//cellular process;GO:0065007//biological regulation;GO:0042592//homeostatic process;GO:0008150//biological_process;GO:0065008//regulation of biological quality
Bra000731	0.001	0.001	0	notest	0.001	0.0366667	5.1964	no	35.92	5.95333	-2.59302	yes	-	AT4G11040 (E=1e-122) | protein phosphatase 2C, putative / PP2C, putative	-	-	-	-	-	GO:0003674//molecular_function;GO:0016787//hydrolase activity;GO:0003824//catalytic activity	GO:0044237//cellular metabolic process;GO:0043170//macromolecule metabolic process;GO:0071704//organic substance metabolic process;GO:0006464//cellular protein modification process;GO:0019538//protein metabolic process;GO:0036211//protein modification process;GO:0044238//primary metabolic process;GO:0044267//cellular protein metabolic process;GO:0043412//macromolecule modification;GO:0009987//cel…
Bra000732	0.553333	0.001	-9.11201	yes	0.91	0.001	-9.82972	yes	0.793333	0.0733333	-3.43539	yes	AtGH9C3	AT4G11050 (E=9e-165) AtGH9C3 | AtGH9C3 (Arabidopsis thaliana glycosyl hydrolase 9C3); carbohydrate binding / catalytic/ hydrolase, hydrolyzing O-glycosyl compounds	-	-	-	-	-	GO:0003674//molecular_function;GO:0005488//binding;GO:0030246//carbohydrate binding;GO:0016787//hydrolase activity;GO:0003824//catalytic activity	GO:0009987//cellular process;GO:0044238//primary metabolic process;GO:0005975//carbohydrate metabolic process;GO:0008150//biological_process;GO:0008152//metabolic process;GO:0071704//organic substance metabolic process;GO:0009056//catabolic process
Bra000733	3.29333	1.50333	-1.13138	yes	2.17333	1.85667	-0.227195	no	1.88667	1.81667	-0.0545458	no	-	-	-	-	-	-	-	-	-
Bra000735	2.45667	0.001	-11.2625	yes	4.36333	0.001	-12.0912	yes	6.36333	0.001	-12.6356	yes	-	AT1G64840 (E=4e-113) | F-box family protein	-	-	-	-	-	GO:0005515//protein binding;GO:0003674//molecular_function;GO:0005488//binding	-
Bra000749	22.0833	11.7333	-0.912345	no	43.7667	15.5467	-1.49323	no	3.19667	0.666667	-2.26153	yes	-	AT4G11660 (E=7e-105) AT-HSFB2B, HSFB2B | AT-HSFB2B; transcription factor/ transcription repressor	-	-	-	-	GO:0044464//cell part;GO:0005575//cellular_component;GO:0044424//intracellular part;GO:0005622//intracellular;GO:0043226//organelle;GO:0043231//intracellular membrane-bounded organelle;GO:0043227//membrane-bounded organelle;GO:0005634//nucleus;GO:0005623//cell;GO:0043229//intracellular organelle	GO:0097159//organic cyclic compound binding;GO:1901363//heterocyclic compound binding;GO:0003674//molecular_function;GO:0003676//nucleic acid binding;GO:0003677//DNA binding;GO:0005488//binding;GO:0003700//transcription factor activity, sequence-specific DNA binding;GO:0001071//nucleic acid binding transcription factor activity	GO:0006725//cellular aromatic compound metabolic process;GO:0050896//response to stimulus;GO:0071704//organic substance metabolic process;GO:0044237//cellular metabolic process;GO:0046483//heterocycle metabolic process;GO:0006139//nucleobase-containing compound metabolic process;GO:0008152//metabolic process;GO:0009058//biosynthetic process;GO:0034641//cellular nitrogen compound metabolic process…
Bra000754	0.596667	0.001	-9.22078	yes	0.14	0.001	-7.12928	no	0.566667	0.001	-9.14636	yes	-	AT4G11890 (E=2e-136) | protein kinase family protein	-	-	-	-	-	GO:0005488//binding;GO:0016301//kinase activity;GO:0003824//catalytic activity;GO:1901265//nucleoside phosphate binding;GO:0003674//molecular_function;GO:0016772//transferase activity, transferring phosphorus-containing groups;GO:0097159//organic cyclic compound binding;GO:0016740//transferase activity;GO:1901363//heterocyclic compound binding;GO:0000166//nucleotide binding;GO:0036094//small mole…	GO:0009607//response to biotic stimulus;GO:0023052//signaling;GO:0065007//biological regulation;GO:0006464//cellular protein modification process;GO:0009605//response to external stimulus;GO:0036211//protein modification process;GO:0044260//cellular macromolecule metabolic process;GO:0007165//signal transduction;GO:0044238//primary metabolic process;GO:0006950//response to stress;GO:0050896//resp…
Bra000755	24.7533	3.77	-2.71499	yes	59.77	12.5867	-2.24753	yes	360.71	234.01	-0.624269	no	-	AT4G11910 (E=5e-129) | INVOLVED IN: biological_process unknown; LOCATED IN: chloroplast; BEST Arabidopsis thaliana protein match is: NYE1 (NON-YELLOWING 1) (TAIR:AT4G22920.1); Has 130 Blast hits to 128 proteins in 45 species: Archae - 0; Bacteria - 50; Metazoa - 0; Fungi - 0; Plants - 78; Viruses - 0; Other Eukaryotes - 2 (source: NCBI BLink).	-	-	-	-	GO:0043229//intracellular organelle;GO:0044464//cell part;GO:0043227//membrane-bounded organelle;GO:0009536//plastid;GO:0009579//thylakoid;GO:0005623//cell;GO:0005737//cytoplasm;GO:0005575//cellular_component;GO:0043226//organelle;GO:0044444//cytoplasmic part;GO:0016020//membrane;GO:0044424//intracellular part;GO:0043231//intracellular membrane-bounded organelle;GO:0005622//intracellular	-	GO:0008150//biological_process;GO:0009987//cellular process;GO:0009056//catabolic process;GO:0008152//metabolic process
Bra000757	48.9233	20.72	-1.2395	yes	47.45	24.76	-0.938397	no	44.09	18.85	-1.22589	yes	PGRL1B	AT4G11960 (E=6e-135) PGRL1B | PGRL1B (PGR5-Like B)	-	-	-	-	GO:0043231//intracellular membrane-bounded organelle;GO:0005575//cellular_component;GO:0005623//cell;GO:0043229//intracellular organelle;GO:0043227//membrane-bounded organelle;GO:0009579//thylakoid;GO:0009536//plastid;GO:0005622//intracellular;GO:0016020//membrane;GO:0043226//organelle;GO:0044444//cytoplasmic part;GO:0044464//cell part;GO:0005737//cytoplasm;GO:0044424//intracellular part	-	GO:0009056//catabolic process;GO:0015979//photosynthesis;GO:0008150//biological_process;GO:0006091//generation of precursor metabolites and energy;GO:0008152//metabolic process;GO:0009987//cellular process;GO:0044237//cellular metabolic process
Bra000758	6.55	0.001	-12.6773	yes	5.08667	0.01	-8.99058	yes	2.68667	0.01	-8.06967	yes	-	AT4G12020 (E=2e-189) WRKY19, ATWRKY19, MAPKKK11 | WRKY19; transcription factor	-	-	-	-	-	GO:0000166//nucleotide binding;GO:0003674//molecular_function;GO:0097159//organic cyclic compound binding;GO:1901265//nucleoside phosphate binding;GO:0036094//small molecule binding;GO:1901363//heterocyclic compound binding;GO:0005515//protein binding;GO:0005488//binding	GO:0006950//response to stress;GO:0008150//biological_process;GO:0050896//response to stimulus
Bra000785	9.66	20.4767	1.08389	yes	21.6733	49.57	1.19355	yes	5.49333	9.90667	0.850718	no	-	AT4G04020 (E=1e-129) FIB | FIB (FIBRILLIN); structural molecule	-	-	-	-	GO:0005575//cellular_component;GO:0044424//intracellular part;GO:0005623//cell;GO:0043231//intracellular membrane-bounded organelle;GO:0009536//plastid;GO:0044464//cell part;GO:0005622//intracellular;GO:0043226//organelle;GO:0043229//intracellular organelle;GO:0044444//cytoplasmic part;GO:0005737//cytoplasm;GO:0043227//membrane-bounded organelle	GO:0005198//structural molecule activity;GO:0003674//molecular_function	-
Bra000794	0.293333	1.99667	2.76698	yes	84.92	99.1667	0.223751	no	124.427	48.6233	-1.35558	yes	-	AT4G04460 (E=5e-247) | aspartyl protease family protein	-	-	-	-	-	GO:0016787//hydrolase activity;GO:0003674//molecular_function;GO:0003824//catalytic activity	GO:0043170//macromolecule metabolic process;GO:0019538//protein metabolic process;GO:0044238//primary metabolic process;GO:0008150//biological_process;GO:0071704//organic substance metabolic process;GO:0008152//metabolic process;GO:0006629//lipid metabolic process;GO:0044699//single-organism process;GO:0044710//single-organism metabolic process
Bra000825	19.0467	11.24	-0.760896	no	6.44667	6.15	-0.067967	no	10.91	4.40333	-1.30898	yes	-	-	-	-	-	-	-	-	-
Bra000840	1.78	1.89667	0.0915889	no	3.27667	15.0833	2.20265	yes	1.66333	0.41	-2.02038	yes	-	AT4G03210 (E=4e-157) XTH9 | XTH9 (XYLOGLUCAN ENDOTRANSGLUCOSYLASE/HYDROLASE 9); hydrolase, acting on glycosyl bonds / xyloglucan:xyloglucosyl transferase	-	-	-	-	GO:0005575//cellular_component;GO:0071944//cell periphery;GO:0005576//extracellular region;GO:0030312//external encapsulating structure;GO:0005623//cell;GO:0005618//cell wall;GO:0044464//cell part	GO:0016787//hydrolase activity;GO:0003824//catalytic activity;GO:0016740//transferase activity;GO:0003674//molecular_function	GO:0071840//cellular component organization or biogenesis;GO:0008152//metabolic process;GO:0071704//organic substance metabolic process;GO:0005975//carbohydrate metabolic process;GO:0016043//cellular component organization;GO:0044238//primary metabolic process;GO:0008150//biological_process;GO:0009987//cellular process
Bra000842	0.793333	2.31	1.54189	yes	0.483333	1.26333	1.38614	no	4.41333	3.74	-0.23883	no	-	AT4G03190 (E=1e-291) GRH1, ATGRH1, AFB1 | GRH1 (GRR1-LIKE PROTEIN 1); auxin binding / protein binding / ubiquitin-protein ligase	Environmental Information Processing	Signal transduction	ko04075//Plant hormone signal transduction	K14485	-	GO:0005488//binding;GO:0003674//molecular_function;GO:0005515//protein binding	-
Bra000843	27.7633	15.2133	-0.867845	no	494.617	199.633	-1.30896	yes	6.25333	8.14333	0.380994	no	CYP702A8	AT1G65670 (E=1e-182) CYP702A1 | CYP702A1; electron carrier/ heme binding / iron ion binding / monooxygenase/ oxygen binding	-	-	-	-	-	GO:0005488//binding;GO:0003824//catalytic activity;GO:0003674//molecular_function	GO:0008150//biological_process;GO:0009056//catabolic process;GO:0008152//metabolic process;GO:0009058//biosynthetic process;GO:0009987//cellular process
Bra000854	32.1933	12.95	-1.31381	yes	29.9433	19.48	-0.620241	no	13.9867	10.5233	-0.41046	no	-	-	-	-	-	-	-	-	-
Bra000861	0.001	0.06	5.90689	no	0.001	0.001	0	notest	0.001	1.13	10.1421	yes	-	-	-	-	-	-	-	-	-
Bra000875	7.79	18	1.2083	yes	22.1633	33.9267	0.614245	no	23.7633	6.39667	-1.89335	yes	-	AT2G02930 (E=6e-103) ATGSTF3, GST16 | ATGSTF3 (GLUTATHIONE S-TRANSFERASE F3); glutathione transferase	Metabolism	Metabolism of other amino acids	ko00480//Glutathione metabolism	K00799	-	GO:0005488//binding;GO:0005515//protein binding;GO:0003674//molecular_function	-
Bra000876	0.436667	1.33333	1.61043	no	3.37333	1.60667	-1.0701	no	2.53667	0.116667	-4.44247	yes	-	AT4G02520 (E=6e-095) ATGSTF2, ATPM24.1, ATPM24, GST2 | ATGSTF2 (GLUTATHIONE S-TRANSFERASE PHI 2); glutathione binding / glutathione transferase	Metabolism	Metabolism of other amino acids	ko00480//Glutathione metabolism	K00799	-	GO:0005488//binding;GO:0005515//protein binding;GO:0003674//molecular_function	-
Bra000883	7.49333	2.82	-1.40991	yes	6.32	3.69333	-0.775001	no	1.06	0.21	-2.3356	yes	-	AT4G02390 (E=5e-298) APP, PARP1, ATPARP1 | APP (ARABIDOPSIS POLY(ADP-RIBOSE) POLYMERASE); NAD+ ADP-ribosyltransferase/ nucleic acid binding	Genetic Information Processing	Replication and repair	ko03410//Base excision repair	K10798	-	GO:0016740//transferase activity;GO:0003676//nucleic acid binding;GO:0003674//molecular_function;GO:0003824//catalytic activity;GO:0097159//organic cyclic compound binding;GO:0005488//binding;GO:1901363//heterocyclic compound binding	GO:0019538//protein metabolic process;GO:0009058//biosynthetic process;GO:0071704//organic substance metabolic process;GO:0036211//protein modification process;GO:0044238//primary metabolic process;GO:0044260//cellular macromolecule metabolic process;GO:0044267//cellular protein metabolic process;GO:0006464//cellular protein modification process;GO:0005975//carbohydrate metabolic process;GO:00434…
Bra000884	9.62333	24.0333	1.32043	no	8.83	17.7167	1.00462	no	12.76	2.23333	-2.51436	yes	-	AT4G02380 (E=4e-029) SAG21, AtLEA5 | SAG21 (SENESCENCE-ASSOCIATED GENE 21)	-	-	-	-	-	-	GO:0050896//response to stimulus;GO:0008150//biological_process;GO:0006950//response to stress
Bra000909	10.2767	2.83667	-1.8571	yes	6.07	7.59333	0.323037	no	2.76667	1.51333	-0.870419	no	-	AT4G01897 (E=1e-048) | unknown protein	-	-	-	-	GO:0005622//intracellular;GO:0005623//cell;GO:0044464//cell part;GO:0005575//cellular_component;GO:0005737//cytoplasm;GO:0044444//cytoplasmic part;GO:0005829//cytosol;GO:0044424//intracellular part	-	-
Bra000925	0.001	0.08	6.32193	no	0.386667	0.2	-0.95109	no	1.68	0.146667	-3.51785	yes	-	AT4G01450 (E=4e-104) | nodulin MtN21 family protein	-	-	-	-	GO:0016020//membrane;GO:0005575//cellular_component	GO:0005215//transporter activity;GO:0003674//molecular_function	GO:0009987//cellular process;GO:0008150//biological_process;GO:0006810//transport;GO:0051234//establishment of localization;GO:0051179//localization
Bra000927	4.00333	7.28	0.862737	no	3.16333	14.2733	2.1738	yes	546.127	691.353	0.340188	no	-	-	-	-	-	-	-	-	-
Bra000935	0.001	0.716667	9.48516	yes	0.001	0.353333	8.46489	no	0.001	0.2	7.64386	no	-	-	-	-	-	-	-	-	-
Bra000942	0.0766667	0.893333	3.54253	yes	0.113333	0.58	2.35548	no	0.11	0.0333333	-1.72247	no	-	AT4G01070 (E=2e-151) GT72B1, UGT72B1 | GT72B1; UDP-glucosyltransferase/ UDP-glycosyltransferase/ transferase, transferring glycosyl groups	-	-	-	-	-	GO:0003824//catalytic activity;GO:0016740//transferase activity;GO:0003674//molecular_function	GO:0008152//metabolic process;GO:0008150//biological_process
Bra000990	1.49	4.31667	1.53461	yes	1.73	3.21	0.891801	no	0.953333	0.873333	-0.126448	no	-	AT3G01750 (E=2e-305) | ankyrin repeat family protein	-	-	-	-	-	GO:0005515//protein binding;GO:0003674//molecular_function;GO:0005488//binding	-
Bra001009	0.233333	2.03	3.12102	yes	0.313333	2.96667	3.24307	no	2.51667	1.91333	-0.395426	no	-	AT3G01290 (E=2e-140) | band 7 family protein	-	-	-	-	GO:0005575//cellular_component;GO:0016020//membrane	-	-
Bra001014	10.6167	7.95333	-0.416699	no	9.13333	2.37	-1.94625	yes	0.31	0.276667	-0.164119	no	-	AT3G16510 (E=2e-041) | C2 domain-containing protein	-	-	-	-	-	GO:0003674//molecular_function;GO:0005488//binding;GO:0005515//protein binding	-
Bra001029	1.81	0.873333	-1.05139	no	3.57667	0.35	-3.35319	yes	0.001	0.0333333	5.05889	no	-	AT4G38940 (E=1e-074) | kelch repeat-containing F-box family protein	-	-	-	-	-	GO:0005488//binding;GO:0005515//protein binding;GO:0003674//molecular_function	-
Bra001030	3.39667	3.18333	-0.0935814	no	3.94	4.01667	0.0278031	no	3.71667	1.65	-1.17154	yes	-	AT3G02130 (E=6e-170) RPK2, TOAD2 | RPK2 (RECEPTOR-LIKE PROTEIN KINASE 2); ATP binding / kinase/ protein serine/threonine kinase	-	-	-	-	-	GO:1901363//heterocyclic compound binding;GO:0016301//kinase activity;GO:0003824//catalytic activity;GO:0000166//nucleotide binding;GO:0016772//transferase activity, transferring phosphorus-containing groups;GO:0016740//transferase activity;GO:0003674//molecular_function;GO:0097159//organic cyclic compound binding;GO:1901265//nucleoside phosphate binding;GO:0036094//small molecule binding;GO:0005…	GO:0008150//biological_process;GO:0044237//cellular metabolic process;GO:0036211//protein modification process;GO:0043412//macromolecule modification;GO:0044238//primary metabolic process;GO:0009987//cellular process;GO:0071704//organic substance metabolic process;GO:0044260//cellular macromolecule metabolic process;GO:0044267//cellular protein metabolic process;GO:0043170//macromolecule metaboli…
Bra001044	14.2833	3.77	-1.9217	yes	15.8767	6.82	-1.21906	yes	1.29333	1.28	-0.0149503	no	-	AT3G02400 (E=9e-044) | forkhead-associated domain-containing protein / FHA domain-containing protein / AT hook motif-containing protein	-	-	-	-	-	GO:0003674//molecular_function;GO:0005515//protein binding;GO:0005488//binding	-
Bra001048	0.0966667	1.87333	4.27645	yes	0.94	2.06667	1.13657	no	0.001	0.001	0	notest	-	-	-	-	-	-	-	-	-
Bra001055	0.123333	0.07	-0.817136	no	1.84	9.26333	2.33183	yes	0.001	0.001	0	notest	-	AT3G02580 (E=1e-056) STE1, DWF7, BUL1 | STE1 (STEROL 1); C-5 sterol desaturase	Metabolism	Lipid metabolism	ko00100//Steroid biosynthesis	K00227	-	GO:0005488//binding;GO:0003674//molecular_function;GO:0003824//catalytic activity	GO:0006629//lipid metabolic process;GO:0044699//single-organism process;GO:0009987//cellular process;GO:0008150//biological_process;GO:0044710//single-organism metabolic process;GO:0008152//metabolic process;GO:0071704//organic substance metabolic process;GO:0009058//biosynthetic process;GO:0044238//primary metabolic process
Bra001071	0.173333	0.556667	1.68326	no	0.416667	0.863333	1.05102	no	16.3367	7.58333	-1.10721	yes	-	AT3G02990 (E=6e-138) ATHSFA1E, HSFA1E | ATHSFA1E; DNA binding / transcription factor	-	-	-	-	GO:0044464//cell part;GO:0044424//intracellular part;GO:0043229//intracellular organelle;GO:0043231//intracellular membrane-bounded organelle;GO:0043226//organelle;GO:0043227//membrane-bounded organelle;GO:0005575//cellular_component;GO:0005622//intracellular;GO:0005634//nucleus;GO:0005623//cell	GO:0003674//molecular_function;GO:0005488//binding;GO:0003676//nucleic acid binding;GO:1901363//heterocyclic compound binding;GO:0097159//organic cyclic compound binding;GO:0001071//nucleic acid binding transcription factor activity;GO:0003677//DNA binding;GO:0003700//transcription factor activity, sequence-specific DNA binding	GO:0071704//organic substance metabolic process;GO:0009628//response to abiotic stimulus;GO:0006950//response to stress;GO:0034641//cellular nitrogen compound metabolic process;GO:0006139//nucleobase-containing compound metabolic process;GO:0009987//cellular process;GO:0009058//biosynthetic process;GO:0006725//cellular aromatic compound metabolic process;GO:0044237//cellular metabolic process;GO:…
Bra001075	0.001	0.0966667	6.59495	no	0.001	0.001	0	notest	15.2433	31.12	1.02966	yes	-	-	-	-	-	-	-	-	-
Bra001078	14.1033	28.5767	1.0188	yes	40.67	59.44	0.547469	no	293.773	344.337	0.229116	no	CYP89A9	AT3G03470 (E=6e-248) CYP89A9 | CYP89A9; electron carrier/ heme binding / iron ion binding / monooxygenase/ oxygen binding	-	-	-	-	-	GO:0003824//catalytic activity;GO:0005488//binding;GO:0003674//molecular_function	GO:0008150//biological_process;GO:0008152//metabolic process
Bra001090	1.54333	0.913333	-0.756836	no	24.4067	3.88667	-2.65067	yes	15.4233	12.1233	-0.347328	no	ATMS2	AT3G03780 (E=3e-241) ATMS2 | AtMS2; 5-methyltetrahydropteroyltriglutamate-homocysteine S-methyltransferase/ methionine synthase	Metabolism	Amino acid metabolism;Global and Overview;Metabolism of other amino acids	ko01230//Biosynthesis of amino acids;ko00270//Cysteine and methionine metabolism;ko00450//Selenocompound metabolism	K00549	GO:0005622//intracellular;GO:0043229//intracellular organelle;GO:0071944//cell periphery;GO:0005886//plasma membrane;GO:0009536//plastid;GO:0005623//cell;GO:0005829//cytosol;GO:0005575//cellular_component;GO:0016020//membrane;GO:0044424//intracellular part;GO:0043226//organelle;GO:0044444//cytoplasmic part;GO:0043227//membrane-bounded organelle;GO:0005576//extracellular region;GO:0043231//intrace…	GO:0003674//molecular_function;GO:0016740//transferase activity;GO:0005488//binding;GO:0003824//catalytic activity	GO:0008152//metabolic process;GO:0009987//cellular process;GO:0008150//biological_process;GO:0009058//biosynthetic process
Bra001097	0.001	0.06	5.90689	no	0.001	0.001	0	notest	74.9333	18.1433	-2.04617	yes	-	AT3G04150 (E=2e-104) | germin-like protein, putative	-	-	-	-	GO:0005576//extracellular region;GO:0005575//cellular_component	GO:0003674//molecular_function;GO:0005488//binding	-
Bra001099	316.313	245.867	-0.363478	no	640.717	62.52	-3.3573	yes	63.8267	10.4667	-2.60836	yes	-	AT3G04280 (E=1e-051) ARR22 | ARR22 (ARABIDOPSIS RESPONSE REGULATOR 22); phosphohistidine phosphatase/ transcription regulator/ two-component response regulator	-	-	-	-	-	GO:0003674//molecular_function;GO:0004871//signal transducer activity	GO:0071704//organic substance metabolic process;GO:0034641//cellular nitrogen compound metabolic process;GO:0023052//signaling;GO:0008150//biological_process;GO:0006139//nucleobase-containing compound metabolic process;GO:0050789//regulation of biological process;GO:0006725//cellular aromatic compound metabolic process;GO:0044238//primary metabolic process;GO:0050896//response to stimulus;GO:0044…
Bra001100	0.0366667	1.06333	4.85798	yes	0.213333	0.0333333	-2.67807	no	0.001	0.001	0	notest	-	AT3G04290 (E=8e-206) ATLTL1, LTL1 | LTL1 (LI-TOLERANT LIPASE 1); carboxylesterase/ hydrolase, acting on ester bonds	-	-	-	-	-	GO:0003824//catalytic activity;GO:0016787//hydrolase activity;GO:0003674//molecular_function	GO:0044699//single-organism process;GO:0008152//metabolic process;GO:0044710//single-organism metabolic process;GO:0044238//primary metabolic process;GO:0006629//lipid metabolic process;GO:0008150//biological_process;GO:0071704//organic substance metabolic process
Bra001122	0.736667	0.0966667	-2.92992	no	1.28333	0.16	-3.00375	no	2.31	0.273333	-3.07916	yes	-	AT3G04720 (E=1e-051) PR4, HEL, PR-4 | PR4 (PATHOGENESIS-RELATED 4); chitin binding	-	-	-	-	-	-	GO:0009605//response to external stimulus;GO:0050896//response to stimulus;GO:0006950//response to stress;GO:0008150//biological_process;GO:0009607//response to biotic stimulus
Bra001123	5.33333	2.48	-1.1047	no	3.08	1.05	-1.55254	no	74.4633	31.0367	-1.26256	yes	PR4	AT3G04720 (E=2e-097) PR4, HEL, PR-4 | PR4 (PATHOGENESIS-RELATED 4); chitin binding	-	-	-	-	-	GO:0005488//binding;GO:0016787//hydrolase activity;GO:0004518//nuclease activity;GO:0016788//hydrolase activity, acting on ester bonds;GO:0003824//catalytic activity;GO:0003674//molecular_function	GO:0009607//response to biotic stimulus;GO:0044237//cellular metabolic process;GO:0006139//nucleobase-containing compound metabolic process;GO:0006810//transport;GO:0046483//heterocycle metabolic process;GO:0006950//response to stress;GO:0050896//response to stimulus;GO:0009605//response to external stimulus;GO:0034641//cellular nitrogen compound metabolic process;GO:0006725//cellular aromatic co…
Bra001140	11.3067	5.25667	-1.10495	yes	3.48	2.05667	-0.758779	no	0.623333	0.69	0.146592	no	-	AT3G05220 (E=5e-026) | heavy-metal-associated domain-containing protein	-	-	-	-	-	GO:0005488//binding;GO:0003674//molecular_function	GO:0008150//biological_process;GO:0051234//establishment of localization;GO:0006810//transport;GO:0051179//localization
Bra001143	6.91	13.2067	0.934509	no	11.0067	16.7667	0.607218	no	2.73667	9.91333	1.85695	yes	-	AT3G05280 (E=8e-149) | integral membrane Yip1 family protein	-	-	-	-	GO:0005575//cellular_component;GO:0016020//membrane	-	-
Bra001144	0.001	4.84	12.2408	yes	0.0733333	6.89667	6.55529	yes	5.86333	16.3133	1.47626	yes	PNC1	AT3G05290 (E=3e-138) PNC1 | PNC1 (PEROXISOMAL ADENINE NUCLEOTIDE CARRIER 1); ADP transmembrane transporter/ ATP transmembrane transporter/ binding	-	-	-	-	GO:0042579//microbody;GO:0044464//cell part;GO:0005575//cellular_component;GO:0016020//membrane;GO:0005623//cell;GO:0043227//membrane-bounded organelle;GO:0043229//intracellular organelle;GO:0043231//intracellular membrane-bounded organelle;GO:0005777//peroxisome;GO:0044424//intracellular part;GO:0043226//organelle;GO:0005737//cytoplasm;GO:0005622//intracellular;GO:0044444//cytoplasmic part	GO:0003674//molecular_function;GO:0005215//transporter activity	GO:0019748//secondary metabolic process;GO:0071704//organic substance metabolic process;GO:0009056//catabolic process;GO:0044707//single-multicellular organism process;GO:0007275//multicellular organism development;GO:0050896//response to stimulus;GO:0006629//lipid metabolic process;GO:0044238//primary metabolic process;GO:0008150//biological_process;GO:0044767//single-organism developmental proc…
Bra001155	6.21667	4.38667	-0.503016	no	1.71333	2.63667	0.621909	no	4.83667	1.98	-1.28851	yes	-	AT3G05580 (E=2e-177) | serine/threonine protein phosphatase, putative	Genetic Information Processing	Translation	ko03015//mRNA surveillance pathway	K06269	-	GO:0003674//molecular_function;GO:0016787//hydrolase activity;GO:0003824//catalytic activity	GO:0008150//biological_process;GO:0043412//macromolecule modification;GO:0071704//organic substance metabolic process;GO:0044260//cellular macromolecule metabolic process;GO:0006464//cellular protein modification process;GO:0019538//protein metabolic process;GO:0009987//cellular process;GO:0036211//protein modification process;GO:0044237//cellular metabolic process;GO:0044267//cellular protein me…
Bra001184	2.85	1.65	-0.788496	no	1.16333	0.623333	-0.900189	no	0.236667	1.22	2.36595	yes	-	AT3G06130 (E=2e-045) | heavy-metal-associated domain-containing protein	-	-	-	-	-	GO:0003674//molecular_function;GO:0005488//binding	GO:0006810//transport;GO:0051234//establishment of localization;GO:0008150//biological_process;GO:0051179//localization
Bra001202	9.81667	9.68	-0.0202262	no	7.20667	6.52	-0.14446	no	4.37667	0.733333	-2.57729	yes	-	AT3G06490 (E=4e-133) MYB108, AtMYB108, BOS1 | MYB108 (myb domain protein 108); DNA binding / transcription factor	-	-	-	-	-	GO:1901363//heterocyclic compound binding;GO:0005488//binding;GO:0003682//chromatin binding;GO:0097159//organic cyclic compound binding;GO:0003676//nucleic acid binding;GO:0003674//molecular_function;GO:0003677//DNA binding;GO:0044877//macromolecular complex binding	-
Bra001209	178.16	88.2567	-1.0134	yes	275.163	93.8	-1.55263	no	0.46	0.07	-2.71621	no	AGL91	AT3G66656 (E=2e-058) AGL91 | AGL91; transcription factor	-	-	-	-	GO:0043227//membrane-bounded organelle;GO:0005623//cell;GO:0043226//organelle;GO:0044424//intracellular part;GO:0005622//intracellular;GO:0043231//intracellular membrane-bounded organelle;GO:0044464//cell part;GO:0005634//nucleus;GO:0043229//intracellular organelle;GO:0005575//cellular_component	GO:0005488//binding;GO:0003700//transcription factor activity, sequence-specific DNA binding;GO:0001071//nucleic acid binding transcription factor activity;GO:0003674//molecular_function;GO:0097159//organic cyclic compound binding;GO:0003676//nucleic acid binding;GO:0003677//DNA binding;GO:1901363//heterocyclic compound binding;GO:0005515//protein binding	GO:0006807//nitrogen compound metabolic process;GO:0009058//biosynthetic process;GO:0046483//heterocycle metabolic process;GO:0006725//cellular aromatic compound metabolic process;GO:0044238//primary metabolic process;GO:0008152//metabolic process;GO:0034641//cellular nitrogen compound metabolic process;GO:0006139//nucleobase-containing compound metabolic process;GO:1901360//organic cyclic compou…
Bra001211	2.54	3.11	0.292086	no	2.63333	2.68	0.0253428	no	0.73	1.96	1.42489	yes	-	AT3G06660 (E=1e-051) | PAPA-1-like family protein / zinc finger (HIT type) family protein	-	-	-	-	GO:0043231//intracellular membrane-bounded organelle;GO:0005575//cellular_component;GO:0043226//organelle;GO:0043227//membrane-bounded organelle;GO:0044424//intracellular part;GO:0043229//intracellular organelle;GO:0005623//cell;GO:0044464//cell part;GO:0005634//nucleus;GO:0005622//intracellular	-	GO:0009058//biosynthetic process;GO:0006807//nitrogen compound metabolic process;GO:0008152//metabolic process;GO:0006725//cellular aromatic compound metabolic process;GO:0034641//cellular nitrogen compound metabolic process;GO:0044238//primary metabolic process;GO:0009987//cellular process;GO:0071840//cellular component organization or biogenesis;GO:0006139//nucleobase-containing compound metabo…
Bra001223	0.2	0.01	-4.32193	yes	0.12	0.106667	-0.169925	no	1.43667	0.953333	-0.591673	no	-	AT3G06880 (E=2e-283) | nucleotide binding	-	-	-	-	-	GO:0005488//binding;GO:0005515//protein binding;GO:0003674//molecular_function	GO:0050896//response to stimulus;GO:0050794//regulation of cellular process;GO:0051716//cellular response to stimulus;GO:0065007//biological regulation;GO:0044700//single organism signaling;GO:0008150//biological_process;GO:0007165//signal transduction;GO:0007154//cell communication;GO:0044699//single-organism process;GO:0023052//signaling;GO:0050789//regulation of biological process;GO:0009987//…
Bra001249	11.5833	4.91333	-1.23728	yes	8.65333	3.07667	-1.49189	no	3.49333	0.88	-1.98903	yes	-	-	-	-	-	-	-	-	-
Bra001256	0.36	0.18	-1	no	0.503333	0.62	0.300754	no	1.91333	0.24	-2.99498	yes	-	AT3G07540 (E=1e-116) | formin homology 2 domain-containing protein / FH2 domain-containing protein	-	-	-	-	GO:0005623//cell;GO:0043228//non-membrane-bounded organelle;GO:0044464//cell part;GO:0043229//intracellular organelle;GO:0005622//intracellular;GO:0044424//intracellular part;GO:0043232//intracellular non-membrane-bounded organelle;GO:0043226//organelle;GO:0005575//cellular_component;GO:0005856//cytoskeleton	-	GO:0071840//cellular component organization or biogenesis;GO:0016043//cellular component organization;GO:0009987//cellular process;GO:0008150//biological_process
Bra001283	5.95	20.1033	1.75647	yes	42.1867	85.38	1.01711	yes	5.41	9.35333	0.789852	no	-	AT3G08040 (E=3e-196) FRD3, MAN1 | FRD3 (FERRIC REDUCTASE DEFECTIVE 3); antiporter/ transporter	-	-	-	-	GO:0016020//membrane;GO:0005575//cellular_component	GO:0003674//molecular_function;GO:0005215//transporter activity	GO:0008150//biological_process;GO:0051234//establishment of localization;GO:0006810//transport;GO:0051179//localization;GO:0009987//cellular process
Bra001308	0.0166667	0.001	-4.05889	no	0.0166667	0.0333333	1	no	0.0966667	0.516667	2.41814	yes	-	AT5G02400 (E=1e-208) PLL2 | PLL2; catalytic/ protein serine/threonine phosphatase	-	-	-	-	-	GO:0003824//catalytic activity;GO:0016787//hydrolase activity;GO:0003674//molecular_function	GO:0044267//cellular protein metabolic process;GO:0071704//organic substance metabolic process;GO:0044238//primary metabolic process;GO:0006464//cellular protein modification process;GO:0019538//protein metabolic process;GO:0036211//protein modification process;GO:0008150//biological_process;GO:0043412//macromolecule modification;GO:0008152//metabolic process;GO:0044260//cellular macromolecule me…
Bra001320	0.001	0.001	0	notest	0.001	0.001	0	notest	1.59333	0.126667	-3.65294	yes	-	AT3G09260 (E=5e-296) PYK10, PSR3.1, BGLU23 | PYK10; beta-glucosidase/ copper ion binding / fucosidase/ hydrolase, hydrolyzing O-glycosyl compounds	Metabolism	Carbohydrate metabolism;Metabolism of other amino acids;Biosynthesis of other secondary metabolites	ko00500//Starch and sucrose metabolism;ko00940//Phenylpropanoid biosynthesis;ko00460//Cyanoamino acid metabolism	K01188	-	GO:0003824//catalytic activity;GO:0016787//hydrolase activity;GO:0003674//molecular_function	GO:0071704//organic substance metabolic process;GO:0008152//metabolic process;GO:0008150//biological_process;GO:0005975//carbohydrate metabolic process;GO:0044238//primary metabolic process
Bra001322	0.08	0.0566667	-0.4975	no	0.0233333	0.0233333	0	no	0.1	1.09333	3.45066	yes	-	AT3G09240 (E=5e-225) | protein kinase-related	-	-	-	-	-	GO:1901363//heterocyclic compound binding;GO:0016740//transferase activity;GO:0000166//nucleotide binding;GO:0005488//binding;GO:0097159//organic cyclic compound binding;GO:0016301//kinase activity;GO:0003674//molecular_function;GO:0016772//transferase activity, transferring phosphorus-containing groups;GO:0003824//catalytic activity;GO:0036094//small molecule binding;GO:0005515//protein binding;…	GO:0009987//cellular process;GO:0006464//cellular protein modification process;GO:0044238//primary metabolic process;GO:0008152//metabolic process;GO:0071704//organic substance metabolic process;GO:0019538//protein metabolic process;GO:0044267//cellular protein metabolic process;GO:0043412//macromolecule modification;GO:0044260//cellular macromolecule metabolic process;GO:0036211//protein modific…
Bra001324	318.797	151.357	-1.07468	yes	360.727	159.197	-1.1801	yes	116.01	52.67	-1.1392	yes	-	AT3G09200 (E=7e-147) | 60S acidic ribosomal protein P0 (RPP0B)	Genetic Information Processing	Translation	ko03010//Ribosome	K02941	GO:0005575//cellular_component;GO:0005840//ribosome;GO:0044444//cytoplasmic part;GO:0043232//intracellular non-membrane-bounded organelle;GO:0044424//intracellular part;GO:0005737//cytoplasm;GO:0043226//organelle;GO:0005622//intracellular;GO:0043228//non-membrane-bounded organelle;GO:0032991//macromolecular complex;GO:0030529//intracellular ribonucleoprotein complex;GO:0043229//intracellular orga…	GO:0005198//structural molecule activity;GO:0003674//molecular_function	GO:0006412//translation;GO:0009059//macromolecule biosynthetic process;GO:1901576//organic substance biosynthetic process;GO:0019538//protein metabolic process;GO:1901566//organonitrogen compound biosynthetic process;GO:0006807//nitrogen compound metabolic process;GO:0043170//macromolecule metabolic process;GO:0044267//cellular protein metabolic process;GO:0010467//gene expression;GO:0044260//cel…
Bra001325	8.95333	3.10333	-1.52861	yes	6.07667	2.53333	-1.26224	no	3.39	1.29667	-1.38648	yes	-	AT3G09150 (E=1e-157) HY2, GUN3 | HY2 (ELONGATED HYPOCOTYL 2); phytochromobilin:ferredoxin oxidoreductase	Metabolism	Metabolism of cofactors and vitamins	ko00860//Porphyrin and chlorophyll metabolism	K08101	-	GO:0003824//catalytic activity;GO:0003674//molecular_function;GO:0005488//binding	GO:0008152//metabolic process;GO:0008150//biological_process;GO:0009987//cellular process;GO:0009058//biosynthetic process
Bra001332	8.10333	2.98	-1.4432	yes	16.1767	17.0267	0.0738817	no	1.95333	0.406667	-2.26402	yes	-	AT3G09190 (E=3e-110) | sugar binding	-	-	-	-	-	GO:0003674//molecular_function;GO:0005488//binding;GO:0030246//carbohydrate binding	-
Bra001333	3.37667	0.613333	-2.46086	yes	3.64667	0.733333	-2.31404	yes	1.68667	0.406667	-2.05226	yes	-	AT3G09010 (E=2e-162) | protein kinase family protein	-	-	-	-	-	GO:0005488//binding;GO:0036094//small molecule binding;GO:0016301//kinase activity;GO:0003674//molecular_function;GO:1901265//nucleoside phosphate binding;GO:1901363//heterocyclic compound binding;GO:0097159//organic cyclic compound binding;GO:0003824//catalytic activity;GO:0016772//transferase activity, transferring phosphorus-containing groups;GO:0016740//transferase activity;GO:0000166//nucleo…	GO:0044260//cellular macromolecule metabolic process;GO:0036211//protein modification process;GO:0019538//protein metabolic process;GO:0006464//cellular protein modification process;GO:0008152//metabolic process;GO:0071704//organic substance metabolic process;GO:0044267//cellular protein metabolic process;GO:0043170//macromolecule metabolic process;GO:0008150//biological_process;GO:0043412//macro…
Bra001335	7.18	3.16	-1.18406	yes	6.01667	3.07333	-0.96916	no	2.81	0.893333	-1.6533	yes	-	AT3G08950 (E=3e-148) | electron transport SCO1/SenC family protein	-	-	-	-	GO:0043229//intracellular organelle;GO:0016020//membrane;GO:0005737//cytoplasm;GO:0043226//organelle;GO:0044444//cytoplasmic part;GO:0005623//cell;GO:0005575//cellular_component;GO:0043231//intracellular membrane-bounded organelle;GO:0005622//intracellular;GO:0044424//intracellular part;GO:0043227//membrane-bounded organelle;GO:0005739//mitochondrion;GO:0044464//cell part	GO:0003674//molecular_function;GO:0005488//binding	GO:0044763//single-organism cellular process;GO:0006810//transport;GO:0065008//regulation of biological quality;GO:0019725//cellular homeostasis;GO:0042592//homeostatic process;GO:0071840//cellular component organization or biogenesis;GO:0065007//biological regulation;GO:0009987//cellular process;GO:0044699//single-organism process;GO:0016043//cellular component organization;GO:0051179//localizat…
Bra001341	2.59333	48.4567	4.22382	yes	27.8767	97.6033	1.80787	yes	78.75	39.5267	-0.994454	no	PYD4	AT3G08860 (E=2e-115) | alanine--glyoxylate aminotransferase, putative / beta-alanine-pyruvate aminotransferase, putative / AGT, putative	Metabolism	Amino acid metabolism	ko00270//Cysteine and methionine metabolism;ko00260//Glycine, serine and threonine metabolism;ko00250//Alanine, aspartate and glutamate metabolism;ko00280//Valine, leucine and isoleucine degradation	K00827	-	GO:0016740//transferase activity;GO:0003824//catalytic activity;GO:0003674//molecular_function;GO:0005488//binding	GO:0016043//cellular component organization;GO:0008150//biological_process;GO:0044707//single-multicellular organism process;GO:0009838//abscission;GO:0032502//developmental process;GO:0071840//cellular component organization or biogenesis;GO:0008152//metabolic process;GO:0007275//multicellular organism development;GO:0044767//single-organism developmental process;GO:0044699//single-organism proc…
Bra001345	694.79	609.207	-0.189645	no	634.627	752.523	0.245828	no	74.6	18.2033	-2.03497	yes	-	AT3G08770 (E=2e-033) LTP6 | LTP6; lipid binding	-	-	-	-	-	GO:0003674//molecular_function;GO:0005488//binding;GO:0008289//lipid binding	GO:0051234//establishment of localization;GO:0008150//biological_process;GO:0006810//transport;GO:0051179//localization
Bra001349	0.206667	1.38667	2.74624	yes	2.35333	6.61333	1.49067	no	0.88	0.106667	-3.04439	yes	-	AT3G08660 (E=3e-231) | phototropic-responsive protein, putative	-	-	-	-	-	GO:0005515//protein binding;GO:0005488//binding;GO:0003674//molecular_function	-
Bra001354	14.4967	5.44667	-1.41228	yes	9.38667	6.02	-0.640849	no	12.69	10.7767	-0.235781	no	-	AT3G10330 (E=1e-169) | transcription initiation factor IIB-2 / general transcription factor TFIIB-2 (TFIIB2)	Genetic Information Processing	Transcription	ko03022//Basal transcription factors	K03124	GO:0043226//organelle;GO:0043227//membrane-bounded organelle;GO:0044424//intracellular part;GO:0043229//intracellular organelle;GO:0043231//intracellular membrane-bounded organelle;GO:0005622//intracellular;GO:0005737//cytoplasm;GO:0044464//cell part;GO:0005575//cellular_component;GO:0005623//cell;GO:0005634//nucleus	GO:0005488//binding;GO:0003674//molecular_function;GO:0005515//protein binding	GO:0044238//primary metabolic process;GO:0006725//cellular aromatic compound metabolic process;GO:0006807//nitrogen compound metabolic process;GO:0008152//metabolic process;GO:0008150//biological_process;GO:0071704//organic substance metabolic process;GO:0046483//heterocycle metabolic process;GO:0009987//cellular process;GO:0009058//biosynthetic process;GO:0034641//cellular nitrogen compound meta…
Bra001392	28.0567	11.5433	-1.28128	yes	21.3967	10.4867	-1.02883	no	7.21333	1.87333	-1.94506	yes	-	AT3G11170 (E=2e-220) FAD7, FADD | FAD7 (FATTY ACID DESATURASE 7); omega-3 fatty acid desaturase	Metabolism	Global and Overview;Lipid metabolism	ko01212//Fatty acid metabolism;ko01040//Biosynthesis of unsaturated fatty acids	K10257	-	GO:0003674//molecular_function;GO:0003824//catalytic activity	GO:0008150//biological_process;GO:0044238//primary metabolic process;GO:0044699//single-organism process;GO:0044710//single-organism metabolic process;GO:0008152//metabolic process;GO:0071704//organic substance metabolic process;GO:0006629//lipid metabolic process
Bra001402	1.64333	1.57667	-0.0597475	no	11.3433	3.05667	-1.89181	yes	0.0266667	0.0233333	-0.192645	no	-	-	-	-	-	-	-	-	-
Bra001404	0.223333	0.001	-7.80305	yes	0.153333	0.02	-2.9386	no	0.02	0.001	-4.32193	no	-	AT3G11450 (E=5e-075) | DNAJ heat shock N-terminal domain-containing protein / cell division protein-related	-	-	-	-	-	GO:0003677//DNA binding;GO:0003682//chromatin binding;GO:0005488//binding;GO:0003674//molecular_function;GO:0003676//nucleic acid binding;GO:1901363//heterocyclic compound binding;GO:0044877//macromolecular complex binding;GO:0097159//organic cyclic compound binding	-
Bra001405	10.63	166.567	3.96989	yes	45.2233	222.833	2.30083	yes	1.09333	0.77	-0.505803	no	-	AT3G11480 (E=8e-185) BSMT1, ATBSMT1 | BSMT1; S-adenosylmethionine-dependent methyltransferase	-	-	-	-	-	GO:0016740//transferase activity;GO:0003824//catalytic activity;GO:0003674//molecular_function	GO:0008152//metabolic process;GO:0008150//biological_process
Bra001434	0.863333	0.001	-9.75377	yes	0.08	0.001	-6.32193	no	0.001	0.0433333	5.43741	no	-	AT4G13090 (E=1e-123) | xyloglucan:xyloglucosyl transferase, putative / xyloglucan endotransglycosylase, putative / endo-xyloglucan transferase, putative	-	-	-	-	GO:0005575//cellular_component;GO:0030312//external encapsulating structure;GO:0005623//cell;GO:0005618//cell wall;GO:0071944//cell periphery;GO:0005576//extracellular region;GO:0044464//cell part	GO:0016787//hydrolase activity;GO:0003674//molecular_function;GO:0016740//transferase activity;GO:0003824//catalytic activity	GO:0008152//metabolic process;GO:0071704//organic substance metabolic process;GO:0044238//primary metabolic process;GO:0016043//cellular component organization;GO:0005975//carbohydrate metabolic process;GO:0071840//cellular component organization or biogenesis;GO:0008150//biological_process;GO:0009987//cellular process
Bra001438	0.713333	4.46	2.6444	yes	1.98333	3.80333	0.939337	no	0.39	1.05	1.42884	no	-	-	-	-	-	-	-	-	-
Bra001440	0.001	0.05	5.64386	no	0.78	2.90333	1.89616	yes	12.2067	29.1867	1.25764	yes	-	AT3G12240 (E=6e-160) SCPL15 | SCPL15 (serine carboxypeptidase-like 15); serine-type carboxypeptidase	-	-	-	-	-	GO:0003824//catalytic activity;GO:0003674//molecular_function;GO:0016787//hydrolase activity	GO:0019538//protein metabolic process;GO:0071704//organic substance metabolic process;GO:0044238//primary metabolic process;GO:0008150//biological_process;GO:0008152//metabolic process;GO:0043170//macromolecule metabolic process
Bra001449	3.33333	0.696667	-2.25843	yes	2.27667	1.49333	-0.608387	no	0.47	0.0866667	-2.43911	no	-	-	-	-	-	-	-	-	-
Bra001457	196.483	61.8667	-1.66717	yes	305.11	106.137	-1.52341	yes	83.1967	14.3833	-2.53213	yes	-	AT3G12580 (E=2e-260) HSP70 | HSP70 (heat shock protein 70); ATP binding	Genetic Information Processing;Cellular Processes	Transport and catabolism;Transcription;Folding, sorting and degradation	ko04141//Protein processing in endoplasmic reticulum;ko03040//Spliceosome;ko04144//Endocytosis	K03283	-	GO:0036094//small molecule binding;GO:0003674//molecular_function;GO:0000166//nucleotide binding;GO:1901265//nucleoside phosphate binding;GO:1901363//heterocyclic compound binding;GO:0097159//organic cyclic compound binding;GO:0005488//binding	-
Bra001460	41.5933	69.98	0.75059	no	28.7167	75.2433	1.38968	yes	3.39667	4.83333	0.508899	no	-	AT3G12610 (E=7e-184) DRT100 | DRT100 (DNA-DAMAGE REPAIR/TOLERATION 100); nucleotide binding / protein binding	-	-	-	-	-	GO:0005488//binding;GO:0003674//molecular_function;GO:0005515//protein binding	-
Bra001466	0.206667	0.42	1.02308	no	0.0266667	0.0266667	0	no	0.7	0.0933333	-2.90689	yes	-	AT3G12700 (E=3e-182) | aspartyl protease family protein	-	-	-	-	-	GO:0016787//hydrolase activity;GO:0003674//molecular_function;GO:0003824//catalytic activity	GO:0019538//protein metabolic process;GO:0043170//macromolecule metabolic process;GO:0044238//primary metabolic process;GO:0008150//biological_process;GO:0008152//metabolic process;GO:0071704//organic substance metabolic process
Bra001480	4.05	2.86	-0.501907	no	0.386667	2.21	2.51488	yes	1.75	0.276667	-2.66113	yes	-	AT3G12977 (E=3e-118) | DNA binding	-	-	-	-	GO:0005634//nucleus;GO:0005575//cellular_component;GO:0043229//intracellular organelle;GO:0043227//membrane-bounded organelle;GO:0005622//intracellular;GO:0043226//organelle;GO:0044464//cell part;GO:0044424//intracellular part;GO:0043231//intracellular membrane-bounded organelle;GO:0005623//cell	GO:0003676//nucleic acid binding;GO:0003674//molecular_function;GO:0005488//binding;GO:1901363//heterocyclic compound binding;GO:0003677//DNA binding;GO:0097159//organic cyclic compound binding	GO:0071704//organic substance metabolic process;GO:0009058//biosynthetic process;GO:0034641//cellular nitrogen compound metabolic process;GO:0006807//nitrogen compound metabolic process;GO:1901360//organic cyclic compound metabolic process;GO:0006139//nucleobase-containing compound metabolic process;GO:0009987//cellular process;GO:0008152//metabolic process;GO:0008150//biological_process;GO:00067…
Bra001488	0.0766667	0.416667	2.44222	yes	0.16	0.64	2	no	0.0566667	0.143333	1.3388	no	-	AT3G13080 (E=0.0) ATMRP3, MRP3 | ATMRP3; ATPase, coupled to transmembrane movement of substances / chlorophyll catabolite transporter/ glutathione S-conjugate-exporting ATPase	-	-	-	-	GO:0005575//cellular_component;GO:0016020//membrane	GO:0003674//molecular_function;GO:0003824//catalytic activity;GO:0005488//binding;GO:1901363//heterocyclic compound binding;GO:0005215//transporter activity;GO:0016787//hydrolase activity;GO:0097159//organic cyclic compound binding;GO:0036094//small molecule binding;GO:0000166//nucleotide binding;GO:1901265//nucleoside phosphate binding	GO:0008150//biological_process;GO:0006810//transport;GO:0051234//establishment of localization;GO:0009987//cellular process;GO:0051179//localization
Bra001516	0.001	0.11	6.78136	no	1.11333	0.253333	-2.13578	no	2.16667	0.14	-3.95198	yes	-	-	-	-	-	-	-	-	-
Bra001526	22.0167	10.4367	-1.07694	yes	23.26	12	-0.954817	no	17.1067	9.56667	-0.83847	no	-	AT3G13882 (E=7e-067) | structural constituent of ribosome	Genetic Information Processing	Translation	ko03010//Ribosome	K02914	GO:0043232//intracellular non-membrane-bounded organelle;GO:0005575//cellular_component;GO:0043228//non-membrane-bounded organelle;GO:0030529//intracellular ribonucleoprotein complex;GO:0005840//ribosome;GO:0043229//intracellular organelle;GO:0043226//organelle;GO:0044424//intracellular part;GO:1990904//ribonucleoprotein complex;GO:0044464//cell part;GO:0005623//cell;GO:0005622//intracellular;GO:…	GO:0005198//structural molecule activity;GO:0003674//molecular_function	GO:0044271//cellular nitrogen compound biosynthetic process;GO:0043043//peptide biosynthetic process;GO:1901576//organic substance biosynthetic process;GO:0044260//cellular macromolecule metabolic process;GO:0006412//translation;GO:0043604//amide biosynthetic process;GO:0044238//primary metabolic process;GO:1901564//organonitrogen compound metabolic process;GO:0034641//cellular nitrogen compound …
Bra001528	4.41	1.44	-1.61471	no	3.66	1.96333	-0.898539	no	3.68	0.683333	-2.42904	yes	-	AT3G13882 (E=4e-034) | structural constituent of ribosome	Genetic Information Processing	Translation	ko03010//Ribosome	K02914	GO:0043229//intracellular organelle;GO:0044424//intracellular part;GO:0005623//cell;GO:0043228//non-membrane-bounded organelle;GO:1990904//ribonucleoprotein complex;GO:0030529//intracellular ribonucleoprotein complex;GO:0043232//intracellular non-membrane-bounded organelle;GO:0005840//ribosome;GO:0005737//cytoplasm;GO:0005622//intracellular;GO:0044464//cell part;GO:0043226//organelle;GO:0044444//…	GO:0005198//structural molecule activity;GO:0003674//molecular_function	GO:0006518//peptide metabolic process;GO:0008152//metabolic process;GO:0071704//organic substance metabolic process;GO:0034641//cellular nitrogen compound metabolic process;GO:0006412//translation;GO:0008150//biological_process;GO:1901564//organonitrogen compound metabolic process;GO:0010467//gene expression;GO:0043604//amide biosynthetic process;GO:0043603//cellular amide metabolic process;GO:00…
Bra001530	39.16	90.5767	1.20976	yes	49.0833	105.8	1.10803	yes	17.7367	33.9467	0.936535	no	-	AT3G13920 (E=2e-232) EIF4A1, RH4, TIF4A1 | EIF4A1 (EUKARYOTIC TRANSLATION INITIATION FACTOR 4A1); ATP-dependent helicase/ translation initiation factor	Genetic Information Processing	Translation	ko03013//RNA transport	K03257	-	GO:0036094//small molecule binding;GO:0097159//organic cyclic compound binding;GO:0003824//catalytic activity;GO:0005488//binding;GO:1901363//heterocyclic compound binding;GO:0003676//nucleic acid binding;GO:1901265//nucleoside phosphate binding;GO:0000166//nucleotide binding;GO:0016787//hydrolase activity;GO:0003674//molecular_function	-
Bra001537	11.1967	5.08667	-1.13828	yes	7.02333	5.37	-0.387234	no	7.41333	4.93667	-0.586585	no	-	-	-	-	-	-	-	-	-
Bra001539	54.9533	26.48	-1.0533	yes	26.16	20.1967	-0.373245	no	31.9367	22.5533	-0.501873	no	-	-	-	-	-	-	-	-	-
Bra001546	40.1967	33.9333	-0.244373	no	95.9133	43.0767	-1.15482	yes	0.656667	0.6	-0.130199	no	-	AT1G53840 (E=6e-213) ATPME1 | ATPME1; pectinesterase	-	-	-	-	GO:0005623//cell;GO:0044464//cell part;GO:0030312//external encapsulating structure;GO:0005575//cellular_component;GO:0005618//cell wall;GO:0071944//cell periphery	GO:0098772//molecular function regulator;GO:0016787//hydrolase activity;GO:0030234//enzyme regulator activity;GO:0003674//molecular_function;GO:0003824//catalytic activity	GO:0071704//organic substance metabolic process;GO:0044238//primary metabolic process;GO:0016043//cellular component organization;GO:0008152//metabolic process;GO:0005975//carbohydrate metabolic process;GO:0009056//catabolic process;GO:0071840//cellular component organization or biogenesis;GO:0008150//biological_process;GO:0009987//cellular process
Bra001547	1.09667	0.666667	-0.718088	no	1.3	0.0833333	-3.96347	yes	0.001	0.02	4.32193	no	-	AT3G14310 (E=1e-291) ATPME3 | ATPME3; pectinesterase	Metabolism	Carbohydrate metabolism	ko00500//Starch and sucrose metabolism;ko00040//Pentose and glucuronate interconversions	K01051	GO:0005623//cell;GO:0005575//cellular_component;GO:0044464//cell part;GO:0071944//cell periphery;GO:0030312//external encapsulating structure;GO:0005618//cell wall	GO:0098772//molecular function regulator;GO:0030234//enzyme regulator activity;GO:0003824//catalytic activity;GO:0016787//hydrolase activity;GO:0003674//molecular_function	GO:0071704//organic substance metabolic process;GO:0009987//cellular process;GO:0071840//cellular component organization or biogenesis;GO:0005975//carbohydrate metabolic process;GO:0016043//cellular component organization;GO:0008152//metabolic process;GO:0044238//primary metabolic process;GO:0008150//biological_process;GO:0009056//catabolic process
Bra001550	0.353333	1.05667	1.58042	no	1.46	2.66333	0.867265	no	14.4333	6.11667	-1.23859	yes	-	AT3G14415 (E=2e-189) | (S)-2-hydroxy-acid oxidase, peroxisomal, putative / glycolate oxidase, putative / short chain alpha-hydroxy acid oxidase, putative	Cellular Processes;Metabolism	Global and Overview;Transport and catabolism;Carbohydrate metabolism	ko01200//Carbon metabolism;ko04146//Peroxisome;ko00630//Glyoxylate and dicarboxylate metabolism	K11517	-	GO:0003824//catalytic activity;GO:1901265//nucleoside phosphate binding;GO:0005488//binding;GO:0003674//molecular_function;GO:0097159//organic cyclic compound binding;GO:0036094//small molecule binding;GO:1901363//heterocyclic compound binding;GO:0000166//nucleotide binding	GO:0008152//metabolic process;GO:0008150//biological_process
Bra001551	2.05333	5.96333	1.53815	yes	2.82333	7.52333	1.41397	no	1.09667	2.53333	1.20791	no	-	AT3G14420 (E=1e-138) | (S)-2-hydroxy-acid oxidase, peroxisomal, putative / glycolate oxidase, putative / short chain alpha-hydroxy acid oxidase, putative	Cellular Processes;Metabolism	Global and Overview;Transport and catabolism;Carbohydrate metabolism	ko01200//Carbon metabolism;ko04146//Peroxisome;ko00630//Glyoxylate and dicarboxylate metabolism	K11517	GO:0043229//intracellular organelle;GO:0009536//plastid;GO:0005777//peroxisome;GO:0032991//macromolecular complex;GO:0030529//intracellular ribonucleoprotein complex;GO:0044444//cytoplasmic part;GO:0005829//cytosol;GO:0005623//cell;GO:0044424//intracellular part;GO:0016020//membrane;GO:0043231//intracellular membrane-bounded organelle;GO:0042579//microbody;GO:0005737//cytoplasm;GO:0043232//intrac…	GO:0003824//catalytic activity;GO:0000166//nucleotide binding;GO:1901363//heterocyclic compound binding;GO:0005488//binding;GO:1901265//nucleoside phosphate binding;GO:0097159//organic cyclic compound binding;GO:0036094//small molecule binding;GO:0003674//molecular_function	GO:0008150//biological_process;GO:0009719//response to endogenous stimulus;GO:0009607//response to biotic stimulus;GO:0009987//cellular process;GO:0008152//metabolic process;GO:0050896//response to stimulus;GO:0006950//response to stress;GO:0009605//response to external stimulus;GO:0009058//biosynthetic process
Bra001565	0.19	0.293333	0.626542	no	0.0433333	0.06	0.469485	no	0.556667	0.12	-2.21378	yes	MSL5	AT3G14810 (E=0.0) MSL5 | MSL5 (MECHANOSENSITIVE CHANNEL OF SMALL CONDUCTANCE-LIKE 5)	-	-	-	-	GO:0005575//cellular_component;GO:0016020//membrane	-	GO:0006810//transport;GO:0009987//cellular process;GO:0051234//establishment of localization;GO:0051179//localization;GO:0008150//biological_process
Bra001567	6.96333	3.23333	-1.10676	yes	0.676667	0.486667	-0.475511	no	0.001	0.0133333	3.73697	no	-	AT3G14840 (E=0.0) | leucine-rich repeat family protein / protein kinase family protein	-	-	-	-	-	GO:0097159//organic cyclic compound binding;GO:0016772//transferase activity, transferring phosphorus-containing groups;GO:0000166//nucleotide binding;GO:0003824//catalytic activity;GO:1901363//heterocyclic compound binding;GO:0016740//transferase activity;GO:0036094//small molecule binding;GO:0003674//molecular_function;GO:1901265//nucleoside phosphate binding;GO:0016301//kinase activity;GO:0005…	GO:0044237//cellular metabolic process;GO:0006464//cellular protein modification process;GO:0008152//metabolic process;GO:0044267//cellular protein metabolic process;GO:0008150//biological_process;GO:0044238//primary metabolic process;GO:0071704//organic substance metabolic process;GO:0044260//cellular macromolecule metabolic process;GO:0043170//macromolecule metabolic process;GO:0036211//protein…
Bra001576	2.96667	8.71	1.55383	yes	8.55333	12.9067	0.593558	no	1.59667	1.84	0.204643	no	-	AT3G14960 (E=3e-176) | galactosyltransferase family protein	-	-	-	-	GO:0012505//endomembrane system;GO:0005623//cell;GO:0005794//Golgi apparatus;GO:0005737//cytoplasm;GO:0043229//intracellular organelle;GO:0043226//organelle;GO:0044464//cell part;GO:0044424//intracellular part;GO:0043227//membrane-bounded organelle;GO:0044444//cytoplasmic part;GO:0005575//cellular_component;GO:0005622//intracellular;GO:0043231//intracellular membrane-bounded organelle;GO:0016020/…	GO:0016740//transferase activity;GO:0003824//catalytic activity;GO:0003674//molecular_function	GO:0044237//cellular metabolic process;GO:0044267//cellular protein metabolic process;GO:0044260//cellular macromolecule metabolic process;GO:0008152//metabolic process;GO:0044238//primary metabolic process;GO:0036211//protein modification process;GO:0043170//macromolecule metabolic process;GO:0005975//carbohydrate metabolic process;GO:0008150//biological_process;GO:0009058//biosynthetic process;…
Bra001577	8.02333	16.98	1.08156	yes	4.51667	9.69333	1.10173	no	1.31667	1.51667	0.204014	no	-	-	-	-	-	-	-	-	-
Bra001578	14.1433	34.1367	1.2712	yes	16.89	41.3367	1.29125	yes	8.72333	27.49	1.65596	yes	-	-	-	-	-	-	-	-	-
Bra001579	0.833333	3.09	1.89064	yes	3.33333	8.75	1.39232	yes	6.28667	11.3867	0.856978	no	-	-	-	-	-	-	-	-	-
Bra001580	1.81667	2.26667	0.319279	no	5.19667	6.74333	0.375875	no	0.963333	3.48	1.85298	yes	-	-	-	-	-	-	-	-	-
Bra001586	8.09333	21.0567	1.37947	yes	7.86667	21.73	1.46586	yes	0.456667	1.18333	1.37364	no	-	AT3G15170 (E=6e-124) CUC1, anac054, ATNAC1 | CUC1 (CUP-SHAPED COTYLEDON1); transcription factor	-	-	-	-	GO:0043227//membrane-bounded organelle;GO:0043226//organelle;GO:0043229//intracellular organelle;GO:0043231//intracellular membrane-bounded organelle;GO:0005623//cell;GO:0044424//intracellular part;GO:0005622//intracellular;GO:0044464//cell part;GO:0005575//cellular_component;GO:0005634//nucleus	GO:0003676//nucleic acid binding;GO:1901363//heterocyclic compound binding;GO:0005488//binding;GO:0003677//DNA binding;GO:0097159//organic cyclic compound binding;GO:0003674//molecular_function	GO:0034641//cellular nitrogen compound metabolic process;GO:0006807//nitrogen compound metabolic process;GO:0044237//cellular metabolic process;GO:0008152//metabolic process;GO:0006139//nucleobase-containing compound metabolic process;GO:0008150//biological_process;GO:1901360//organic cyclic compound metabolic process;GO:0071704//organic substance metabolic process;GO:0006725//cellular aromatic c…
Bra001590	1.37667	0.2	-2.78311	yes	0.1	0.0233333	-2.09954	no	0.001	0.001	0	notest	-	AT3G15340 (E=1e-174) PPI2 | PPI2 (proton pump interactor 2); protein binding	-	-	-	-	GO:0043231//intracellular membrane-bounded organelle;GO:0043226//organelle;GO:0043229//intracellular organelle;GO:0012505//endomembrane system;GO:0071944//cell periphery;GO:0043227//membrane-bounded organelle;GO:0005886//plasma membrane;GO:0044464//cell part;GO:0005737//cytoplasm;GO:0044424//intracellular part;GO:0005622//intracellular;GO:0016020//membrane;GO:0005575//cellular_component;GO:004444…	-	GO:0008150//biological_process;GO:0051179//localization;GO:0006810//transport;GO:0051234//establishment of localization
Bra001591	1.17667	4.09333	1.79857	yes	1.38	2.44667	0.826149	no	0.0633333	0.0966667	0.610053	no	-	AT3G15355 (E=4e-137) UBC25, PFU1 | UBC25 (UBIQUITIN-CONJUGATING ENZYME 25); small conjugating protein ligase	Genetic Information Processing	Folding, sorting and degradation	ko04120//Ubiquitin mediated proteolysis	K10581	-	GO:0003824//catalytic activity;GO:0003674//molecular_function	-
Bra001592	3.82	18.5933	2.28314	yes	10.0233	20.9467	1.06336	no	0.001	2.97333	11.5379	yes	-	AT3G15360 (E=9e-057) ATHM4, TRX-M4, ATM4 | TRX-M4 (ARABIDOPSIS THIOREDOXIN M-TYPE 4); enzyme activator	-	-	-	-	-	GO:0003824//catalytic activity;GO:0003674//molecular_function	GO:0044699//single-organism process;GO:0044763//single-organism cellular process;GO:0019725//cellular homeostasis;GO:0008152//metabolic process;GO:0042592//homeostatic process;GO:0065008//regulation of biological quality;GO:0009987//cellular process;GO:0065007//biological regulation;GO:0008150//biological_process
Bra001596	1.29	15.9	3.62358	yes	2.00333	5.63333	1.49159	no	14.68	20.6767	0.494152	no	-	AT3G15500 (E=6e-100) ATNAC3, ANAC055 | ANAC055 (ARABIDOPSIS NAC DOMAIN CONTAINING PROTEIN 55); transcription factor	-	-	-	-	GO:0005622//intracellular;GO:0043226//organelle;GO:0043227//membrane-bounded organelle;GO:0043231//intracellular membrane-bounded organelle;GO:0005575//cellular_component;GO:0005623//cell;GO:0044464//cell part;GO:0044424//intracellular part;GO:0043229//intracellular organelle;GO:0005634//nucleus	GO:1901363//heterocyclic compound binding;GO:0003677//DNA binding;GO:0005488//binding;GO:0097159//organic cyclic compound binding;GO:0003674//molecular_function;GO:0003676//nucleic acid binding	GO:0009987//cellular process;GO:0044238//primary metabolic process;GO:0008150//biological_process;GO:0034641//cellular nitrogen compound metabolic process;GO:0006725//cellular aromatic compound metabolic process;GO:0046483//heterocycle metabolic process;GO:0009058//biosynthetic process;GO:0044237//cellular metabolic process;GO:0006139//nucleobase-containing compound metabolic process;GO:0006807//…
Bra001598	0.396667	5.54667	3.80562	yes	0.123333	2.24667	4.18715	yes	0.196667	0.0633333	-1.63472	no	-	AT3G15540 (E=1e-102) IAA19, MSG2 | IAA19 (INDOLE-3-ACETIC ACID INDUCIBLE 19); transcription factor	Environmental Information Processing	Signal transduction	ko04075//Plant hormone signal transduction	K14484	GO:0005622//intracellular;GO:0005634//nucleus;GO:0005575//cellular_component;GO:0044464//cell part;GO:0043226//organelle;GO:0044424//intracellular part;GO:0043231//intracellular membrane-bounded organelle;GO:0043227//membrane-bounded organelle;GO:0005623//cell;GO:0043229//intracellular organelle	GO:0003674//molecular_function;GO:0005488//binding;GO:0005515//protein binding	GO:0044700//single organism signaling;GO:0008150//biological_process;GO:0009987//cellular process;GO:0044237//cellular metabolic process;GO:0009058//biosynthetic process;GO:0044238//primary metabolic process;GO:0065007//biological regulation;GO:0051716//cellular response to stimulus;GO:0050789//regulation of biological process;GO:0006725//cellular aromatic compound metabolic process;GO:0023052//s…
Bra001599	0.116667	2.13667	4.1949	yes	0.001	0.786667	9.61961	yes	0.336667	14.38	5.4166	yes	-	-	-	-	-	-	-	-	-
Bra001600	5.22333	17.0067	1.70306	yes	8.63	30.08	1.80137	yes	10.2433	8.06667	-0.344641	no	-	AT3G15630 (E=6e-029) | unknown protein	-	-	-	-	-	-	GO:0008150//biological_process
Bra001606	1.75667	8.34667	2.24836	yes	1.82	2.47	0.440573	no	16.3033	7.59333	-1.10236	yes	-	-	-	-	-	-	-	-	-
Bra001607	8.43667	9.08333	0.106549	no	14.8467	10.2633	-0.53264	no	9.57333	3.83667	-1.31917	yes	-	-	-	-	-	-	-	-	-
Bra001614	4.37667	2.54333	-0.783112	no	5.02	2.50667	-1.00192	no	2.15333	0.8	-1.4285	yes	-	AT3G15890 (E=1e-123) | protein kinase family protein	-	-	-	-	-	GO:0000166//nucleotide binding;GO:1901265//nucleoside phosphate binding;GO:0005488//binding;GO:0016740//transferase activity;GO:0097159//organic cyclic compound binding;GO:1901363//heterocyclic compound binding;GO:0003674//molecular_function;GO:0016301//kinase activity;GO:0003824//catalytic activity;GO:0016772//transferase activity, transferring phosphorus-containing groups;GO:0036094//small mole…	GO:0043412//macromolecule modification;GO:0019538//protein metabolic process;GO:0044238//primary metabolic process;GO:0036211//protein modification process;GO:0044260//cellular macromolecule metabolic process;GO:0071704//organic substance metabolic process;GO:0044267//cellular protein metabolic process;GO:0009987//cellular process;GO:0008150//biological_process;GO:0006464//cellular protein modifi…
Bra001615	0.206667	2.67	3.69146	yes	0.64	1.75333	1.45396	no	0.46	1.21333	1.39927	no	-	AT4G14540 (E=2e-062) NF-YB3 | NF-YB3 (NUCLEAR FACTOR Y, SUBUNIT B3); transcription factor	-	-	-	-	GO:0044424//intracellular part;GO:0005575//cellular_component;GO:0044464//cell part;GO:0043231//intracellular membrane-bounded organelle;GO:0043229//intracellular organelle;GO:0043226//organelle;GO:0005622//intracellular;GO:0005623//cell;GO:0043227//membrane-bounded organelle;GO:0005634//nucleus	GO:0005515//protein binding;GO:0003677//DNA binding;GO:1901363//heterocyclic compound binding;GO:0097159//organic cyclic compound binding;GO:0003676//nucleic acid binding;GO:0005488//binding;GO:0003674//molecular_function	GO:0044237//cellular metabolic process;GO:0006139//nucleobase-containing compound metabolic process;GO:1901360//organic cyclic compound metabolic process;GO:0009987//cellular process;GO:0009058//biosynthetic process;GO:0006725//cellular aromatic compound metabolic process;GO:0006807//nitrogen compound metabolic process;GO:0046483//heterocycle metabolic process;GO:0008150//biological_process;GO:00…
Bra001617	1.32333	5.51333	2.05875	yes	1.79667	9.64	2.42371	yes	0.853333	3.16333	1.89026	yes	-	AT3G15990 (E=0.0) SULTR3;4 | SULTR3;4 (SULFATE TRANSPORTER 3;4); sulfate transmembrane transporter	-	-	-	-	GO:0005575//cellular_component;GO:0016020//membrane	GO:0005215//transporter activity;GO:0003674//molecular_function	GO:0009987//cellular process;GO:0051234//establishment of localization;GO:0008150//biological_process;GO:0051179//localization;GO:0006810//transport
Bra001624	0.001	5.99333	12.5491	yes	0.001	8.38	13.0327	yes	0.001	2.33	11.1861	yes	-	AT1G52300 (E=6e-049) | 60S ribosomal protein L37 (RPL37B)	Genetic Information Processing	Translation	ko03010//Ribosome	K02922	GO:0030529//intracellular ribonucleoprotein complex;GO:0043226//organelle;GO:0005622//intracellular;GO:0044424//intracellular part;GO:0005737//cytoplasm;GO:0044444//cytoplasmic part;GO:0005575//cellular_component;GO:0005623//cell;GO:0043228//non-membrane-bounded organelle;GO:0032991//macromolecular complex;GO:0044464//cell part;GO:0043229//intracellular organelle;GO:1990904//ribonucleoprotein com…	GO:0005198//structural molecule activity;GO:0003674//molecular_function	GO:1901566//organonitrogen compound biosynthetic process;GO:0071704//organic substance metabolic process;GO:0008150//biological_process;GO:1901576//organic substance biosynthetic process;GO:1901564//organonitrogen compound metabolic process;GO:0006807//nitrogen compound metabolic process;GO:0006518//peptide metabolic process;GO:0009059//macromolecule biosynthetic process;GO:0019538//protein metab…
Bra001636	162.087	83.8767	-0.950424	no	180.767	80.1167	-1.17395	yes	21.1467	31.5767	0.578429	no	-	-	-	-	-	-	-	-	-
Bra001642	3.55	1.19333	-1.57282	yes	8.10667	10.14	0.322877	no	3.56333	2.89	-0.302158	no	-	AT3G16850 (E=2e-226) | glycoside hydrolase family 28 protein / polygalacturonase (pectinase) family protein	-	-	-	-	GO:0005576//extracellular region;GO:0005575//cellular_component	GO:0016787//hydrolase activity;GO:0003674//molecular_function;GO:0003824//catalytic activity	GO:0005975//carbohydrate metabolic process;GO:0008152//metabolic process;GO:0044238//primary metabolic process;GO:0071840//cellular component organization or biogenesis;GO:0071704//organic substance metabolic process;GO:0009987//cellular process;GO:0016043//cellular component organization;GO:0008150//biological_process
Bra001663	7.74	16.3433	1.0783	yes	11.4267	11.7233	0.0369782	no	13.1567	25.0667	0.929976	no	-	AT3G17440 (E=4e-144) NPSN13, ATNPSN13 | NPSN13 (NOVEL PLANT SNARE 13)	-	-	-	-	-	GO:0003674//molecular_function;GO:0005488//binding;GO:0005515//protein binding	-
Bra001665	8.82333	6.14	-0.523085	no	8.53667	1	-3.09367	yes	6.15333	16.2467	1.4007	yes	-	AT3G17510 (E=3e-221) CIPK1, SnRK3.16 | CIPK1 (CBL-INTERACTING PROTEIN KINASE 1); kinase/ protein binding	Cellular Processes	Transport and catabolism	ko04140//Regulation of autophagy	K07198	-	GO:1901363//heterocyclic compound binding;GO:0003824//catalytic activity;GO:0016772//transferase activity, transferring phosphorus-containing groups;GO:0005488//binding;GO:0097159//organic cyclic compound binding;GO:0000166//nucleotide binding;GO:0036094//small molecule binding;GO:0016301//kinase activity;GO:0016740//transferase activity;GO:0003674//molecular_function;GO:1901265//nucleoside phosp…	GO:0006464//cellular protein modification process;GO:0044238//primary metabolic process;GO:0019538//protein metabolic process;GO:0044699//single-organism process;GO:0050896//response to stimulus;GO:0043170//macromolecule metabolic process;GO:0044267//cellular protein metabolic process;GO:0007165//signal transduction;GO:0043412//macromolecule modification;GO:0008152//metabolic process;GO:0008150//…
Bra001670	15.6233	5.15667	-1.59919	yes	4.61333	5.88333	0.350824	no	0.001	0.14	7.12928	no	-	AT3G17600 (E=2e-053) IAA31 | IAA31 (INDOLE-3-ACETIC ACID INDUCIBLE 31); transcription factor	Environmental Information Processing	Signal transduction	ko04075//Plant hormone signal transduction	K14484	GO:0005634//nucleus;GO:0005575//cellular_component;GO:0043226//organelle;GO:0005623//cell;GO:0005622//intracellular;GO:0044424//intracellular part;GO:0043227//membrane-bounded organelle;GO:0043231//intracellular membrane-bounded organelle;GO:0043229//intracellular organelle;GO:0044464//cell part	GO:0003674//molecular_function;GO:0005488//binding;GO:0005515//protein binding	GO:0050896//response to stimulus;GO:0034641//cellular nitrogen compound metabolic process;GO:0044700//single organism signaling;GO:0009058//biosynthetic process;GO:0006807//nitrogen compound metabolic process;GO:0044763//single-organism cellular process;GO:0044238//primary metabolic process;GO:0065007//biological regulation;GO:0046483//heterocycle metabolic process;GO:0009987//cellular process;GO…
Bra001671	1.20667	0.001	-10.2368	yes	0.453333	0.001	-8.82443	no	0.08	0.001	-6.32193	no	-	AT3G17609 (E=1e-058) HYH | HYH (HY5-HOMOLOG); DNA binding / transcription factor	Organismal Systems	Environmental adaptation	ko04712//Circadian rhythm - plant	K16241	-	GO:0003677//DNA binding;GO:0005488//binding;GO:0001071//nucleic acid binding transcription factor activity;GO:0003676//nucleic acid binding;GO:0003674//molecular_function;GO:1901363//heterocyclic compound binding;GO:0003700//transcription factor activity, sequence-specific DNA binding;GO:0097159//organic cyclic compound binding	GO:0006807//nitrogen compound metabolic process;GO:0044237//cellular metabolic process;GO:0006139//nucleobase-containing compound metabolic process;GO:0008150//biological_process;GO:0044238//primary metabolic process;GO:0046483//heterocycle metabolic process;GO:0071704//organic substance metabolic process;GO:0009058//biosynthetic process;GO:0009987//cellular process;GO:0008152//metabolic process;…
Bra001677	0.446667	0.001	-8.80305	no	2.19	0.146667	-3.90032	yes	0.16	0.001	-7.32193	no	-	AT3G17650 (E=8e-128) YSL5, PDE321 | YSL5 (YELLOW STRIPE LIKE 5); oligopeptide transporter	-	-	-	-	-	-	GO:0009987//cellular process;GO:0051234//establishment of localization;GO:0051179//localization;GO:0006810//transport;GO:0008150//biological_process
Bra001686	59.4233	158.237	1.41298	yes	240.153	285.62	0.250141	no	22.5	21.9333	-0.0367999	no	ATGSKB6	AT3G17820 (E=6e-169) ATGSKB6, GLN1.3, GLN1;3 | ATGSKB6; copper ion binding / glutamate-ammonia ligase	Metabolism	Amino acid metabolism;Global and Overview;Energy metabolism;Carbohydrate metabolism	ko01230//Biosynthesis of amino acids;ko00630//Glyoxylate and dicarboxylate metabolism;ko00250//Alanine, aspartate and glutamate metabolism;ko00910//Nitrogen metabolism;ko00220//Arginine biosynthesis	K01915	-	GO:0097159//organic cyclic compound binding;GO:1901363//heterocyclic compound binding;GO:0003674//molecular_function;GO:0005488//binding;GO:0036094//small molecule binding;GO:1901265//nucleoside phosphate binding;GO:0000166//nucleotide binding;GO:0003824//catalytic activity	GO:0008150//biological_process;GO:0009987//cellular process;GO:0008152//metabolic process;GO:0009058//biosynthetic process
Bra001687	3.50333	4.84667	0.468265	no	6.55	5.46333	-0.261713	no	2.29667	0.253333	-3.18043	yes	-	AT2G04920 (E=5e-056) | F-box family protein (FBX9)	-	-	-	-	-	GO:0005515//protein binding;GO:0003674//molecular_function;GO:0005488//binding	-
Bra001692	9.23667	17.1433	0.892203	no	10.3833	21.4367	1.04581	yes	6.41333	11.1233	0.794443	no	atToc64-III	AT3G17970 (E=7e-267) atToc64-III | atToc64-III (Arabidopsis thaliana translocon at the outer membrane of chloroplasts 64-III); binding / carbon-nitrogen ligase, with glutamine as amido-N-donor	-	-	-	-	GO:0005622//intracellular;GO:0005623//cell;GO:0044444//cytoplasmic part;GO:0043226//organelle;GO:0044464//cell part;GO:0005737//cytoplasm;GO:0043231//intracellular membrane-bounded organelle;GO:0043229//intracellular organelle;GO:0009536//plastid;GO:0044424//intracellular part;GO:0005575//cellular_component;GO:0043227//membrane-bounded organelle;GO:0016020//membrane	GO:0003674//molecular_function;GO:0005488//binding;GO:0003824//catalytic activity;GO:0005515//protein binding	GO:0046483//heterocycle metabolic process;GO:0071704//organic substance metabolic process;GO:0006725//cellular aromatic compound metabolic process;GO:0008152//metabolic process;GO:0034641//cellular nitrogen compound metabolic process;GO:0009058//biosynthetic process;GO:0006807//nitrogen compound metabolic process;GO:0006139//nucleobase-containing compound metabolic process;GO:0044237//cellular me…
Bra001697	0.001	0.04	5.32193	no	0.106667	1.14333	3.42206	yes	6.32	2.64	-1.25939	no	-	-	-	-	-	-	-	-	-
Bra001703	8.68667	0.6	-3.85577	yes	9.28	1.33667	-2.79549	yes	3.12333	0.62	-2.33275	yes	-	-	-	-	-	-	-	-	-
Bra001722	21.9367	18.9433	-0.211654	no	34.3733	31.6767	-0.117869	no	8.61667	3.27667	-1.3949	yes	-	-	-	-	-	-	-	-	-
Bra001725	1.59667	4.37333	1.45367	yes	1.80333	2.77333	0.620955	no	4.06	1.39	-1.54639	yes	ATPLT5	AT3G18830 (E=4e-253) ATPLT5 | ATPLT5 (POLYOL TRANSPORTER 5); D-ribose transmembrane transporter/ D-xylose transmembrane transporter/ carbohydrate transmembrane transporter/ galactose transmembrane transporter/ glucose transmembrane transporter/ glycerol transmembrane transporter/ mann	-	-	-	-	GO:0016020//membrane;GO:0005623//cell;GO:0044464//cell part;GO:0005886//plasma membrane;GO:0071944//cell periphery;GO:0005575//cellular_component	GO:0003674//molecular_function;GO:0005215//transporter activity	GO:0007275//multicellular organism development;GO:0008150//biological_process;GO:0044699//single-organism process;GO:0044707//single-multicellular organism process;GO:0051234//establishment of localization;GO:0009791//post-embryonic development;GO:0032502//developmental process;GO:0044767//single-organism developmental process;GO:0009653//anatomical structure morphogenesis;GO:0051179//localizatio…
Bra001728	5.77	2.4	-1.26554	yes	9.51333	1.97667	-2.26688	yes	0.66	0.24	-1.45943	no	-	AT3G18950 (E=5e-208) | transducin family protein / WD-40 repeat family protein	-	-	-	-	-	GO:0003674//molecular_function;GO:0005515//protein binding;GO:0005488//binding	-
Bra001734	1.7	9.58	2.49449	yes	2.68333	25.6967	3.25948	yes	0.0966667	0.316667	1.71187	no	-	AT3G19100 (E=2e-289) | calcium-dependent protein kinase, putative / CDPK, putative	-	-	-	-	-	GO:0097159//organic cyclic compound binding;GO:1901265//nucleoside phosphate binding;GO:1901363//heterocyclic compound binding;GO:0036094//small molecule binding;GO:0003824//catalytic activity;GO:0003674//molecular_function;GO:0000166//nucleotide binding;GO:0016740//transferase activity;GO:0016301//kinase activity;GO:0005488//binding;GO:0016772//transferase activity, transferring phosphorus-conta…	GO:0044237//cellular metabolic process;GO:0009987//cellular process;GO:0043412//macromolecule modification;GO:0071704//organic substance metabolic process;GO:0008152//metabolic process;GO:0036211//protein modification process;GO:0044267//cellular protein metabolic process;GO:0044238//primary metabolic process;GO:0006464//cellular protein modification process;GO:0019538//protein metabolic process;…
Bra001744	19.3167	2.43667	-2.98687	yes	0.55	0.001	-9.10329	no	0.001	0.001	0	notest	-	AT1G49760 (E=5e-018) PAB8, PABP8 | PAB8 (POLY(A) BINDING PROTEIN 8); RNA binding / translation initiation factor	Genetic Information Processing	Translation;Folding, sorting and degradation	ko03013//RNA transport;ko03015//mRNA surveillance pathway;ko03018//RNA degradation	K13126	-	GO:1901363//heterocyclic compound binding;GO:0003676//nucleic acid binding;GO:0003723//RNA binding;GO:0005488//binding;GO:0097159//organic cyclic compound binding;GO:0003674//molecular_function	-
Bra001747	4.92667	6.40667	0.378962	no	5.45667	5.28667	-0.0456616	no	1.12333	0.396667	-1.50179	yes	-	AT3G19480 (E=5e-283) | D-3-phosphoglycerate dehydrogenase, putative / 3-PGDH, putative	Metabolism	Amino acid metabolism;Global and Overview	ko01200//Carbon metabolism;ko01230//Biosynthesis of amino acids;ko00260//Glycine, serine and threonine metabolism	K00058	GO:0044464//cell part;GO:0043229//intracellular organelle;GO:0009536//plastid;GO:0005575//cellular_component;GO:0043226//organelle;GO:0044444//cytoplasmic part;GO:0005622//intracellular;GO:0044424//intracellular part;GO:0005737//cytoplasm;GO:0043231//intracellular membrane-bounded organelle;GO:0043227//membrane-bounded organelle;GO:0005623//cell;GO:0005739//mitochondrion	GO:0036094//small molecule binding;GO:0097159//organic cyclic compound binding;GO:1901363//heterocyclic compound binding;GO:1901265//nucleoside phosphate binding;GO:0003824//catalytic activity;GO:0003674//molecular_function;GO:0000166//nucleotide binding;GO:0005488//binding	GO:0008152//metabolic process;GO:0009058//biosynthetic process;GO:0008150//biological_process;GO:0009987//cellular process
Bra001752	2.94	23.2233	2.98169	yes	3.78333	21.5533	2.51018	yes	19.0433	34.8233	0.870768	no	-	AT3G19580 (E=7e-078) AZF2 | AZF2 (ARABIDOPSIS ZINC-FINGER PROTEIN 2); DNA binding / nucleic acid binding / transcription factor/ transcription repressor/ zinc ion binding	-	-	-	-	-	GO:0005488//binding;GO:0003674//molecular_function	-
Bra001757	12.95	25.5033	0.977734	no	13.71	26.4333	0.94713	no	6.33	16.07	1.34409	yes	-	AT3G19630 (E=4e-182) | radical SAM domain-containing protein	-	-	-	-	GO:0005623//cell;GO:0005575//cellular_component;GO:0044464//cell part;GO:0005622//intracellular;GO:0044424//intracellular part;GO:0005737//cytoplasm	GO:0003674//molecular_function;GO:0016740//transferase activity;GO:0003824//catalytic activity;GO:0005488//binding	GO:0007049//cell cycle;GO:0008152//metabolic process;GO:0006139//nucleobase-containing compound metabolic process;GO:0008150//biological_process;GO:1901360//organic cyclic compound metabolic process;GO:0006725//cellular aromatic compound metabolic process;GO:0006807//nitrogen compound metabolic process;GO:0044238//primary metabolic process;GO:0046483//heterocycle metabolic process;GO:0071704//org…
Bra001781	0.673333	2.40333	1.83564	yes	2.43	4.10333	0.75584	no	7.01333	10.25	0.547452	no	-	AT3G20250 (E=2e-221) APUM5 | APUM5 (Arabidopsis Pumilio 5); RNA binding / binding	-	-	-	-	-	GO:0003723//RNA binding;GO:0003674//molecular_function;GO:0003676//nucleic acid binding;GO:0097159//organic cyclic compound binding;GO:1901363//heterocyclic compound binding;GO:0005488//binding	-
Bra001782	0.613333	0.726667	0.244622	no	5.48667	7.10333	0.372566	no	8.80667	2.52	-1.80517	yes	-	AT3G20260 (E=3e-153) | structural constituent of ribosome	-	-	-	-	GO:0044424//intracellular part;GO:0043229//intracellular organelle;GO:0032991//macromolecular complex;GO:0005575//cellular_component;GO:0044464//cell part;GO:0005623//cell;GO:0044444//cytoplasmic part;GO:0005737//cytoplasm;GO:0005840//ribosome;GO:0043226//organelle;GO:0005622//intracellular;GO:0043228//non-membrane-bounded organelle;GO:0043232//intracellular non-membrane-bounded organelle;GO:1990…	GO:0003674//molecular_function;GO:0005198//structural molecule activity	GO:0006412//translation;GO:0044267//cellular protein metabolic process;GO:0019538//protein metabolic process;GO:0044237//cellular metabolic process;GO:0043604//amide biosynthetic process;GO:0044271//cellular nitrogen compound biosynthetic process;GO:0034641//cellular nitrogen compound metabolic process;GO:1901564//organonitrogen compound metabolic process;GO:0010467//gene expression;GO:1901566//o…
Bra001783	0.173333	0.253333	0.547488	no	0.136667	0.556667	2.02615	no	0.0266667	0.92	5.10852	yes	-	-	-	-	-	-	-	-	-
Bra001794	1.25	0.103333	-3.59655	yes	0.443333	0.206667	-1.10109	no	0.18	0.56	1.63743	no	-	AT3G20570 (E=1e-076) | plastocyanin-like domain-containing protein	-	-	-	-	-	GO:0003674//molecular_function;GO:0005488//binding	-
Bra001799	0.001	0.0933333	6.54432	no	0.001	1.42	10.4717	yes	0.001	0.001	0	notest	-	-	-	-	-	-	-	-	-
Bra001811	0.34	8.16333	4.58555	yes	0.576667	9.31333	4.01349	yes	0.323333	7.35	4.50665	yes	-	AT3G21110 (E=6e-216) PUR7, PURC, ATPURC | PUR7 (PURIN 7); phosphoribosylaminoimidazolesuccinocarboxamide synthase	Metabolism	Nucleotide metabolism	ko00230//Purine metabolism	K01923	-	GO:0003674//molecular_function;GO:0036094//small molecule binding;GO:0003824//catalytic activity;GO:0097159//organic cyclic compound binding;GO:0005488//binding;GO:0000166//nucleotide binding;GO:1901363//heterocyclic compound binding;GO:1901265//nucleoside phosphate binding	GO:0046483//heterocycle metabolic process;GO:0006807//nitrogen compound metabolic process;GO:0044238//primary metabolic process;GO:0009987//cellular process;GO:0044237//cellular metabolic process;GO:0034641//cellular nitrogen compound metabolic process;GO:0009058//biosynthetic process;GO:0006725//cellular aromatic compound metabolic process;GO:0006139//nucleobase-containing compound metabolic pro…
Bra001814	0.001	3.6	11.8138	yes	0.09	3.77	5.3885	yes	0.94	5.90667	2.65161	yes	-	AT3G21140 (E=2e-167) | FMN binding	-	-	-	-	-	GO:0000166//nucleotide binding;GO:0003824//catalytic activity;GO:0003674//molecular_function;GO:0097159//organic cyclic compound binding;GO:0005488//binding;GO:1901363//heterocyclic compound binding;GO:1901265//nucleoside phosphate binding;GO:0036094//small molecule binding	GO:0008152//metabolic process;GO:0008150//biological_process
Bra001816	6.98	3.93667	-0.826252	no	5.80667	3.41333	-0.766529	no	5.15	1.11333	-2.20969	yes	-	AT3G21160 (E=2e-285) | mannosyl-oligosaccharide 1,2-alpha-mannosidase, putative	Genetic Information Processing;Metabolism	Folding, sorting and degradation;Glycan biosynthesis and metabolism	ko04141//Protein processing in endoplasmic reticulum;ko00510//N-Glycan biosynthesis	K01230	GO:0016020//membrane;GO:0005575//cellular_component	GO:0005488//binding;GO:0016787//hydrolase activity;GO:0003824//catalytic activity;GO:0003674//molecular_function	-
Bra001817	4.88667	0.236667	-4.36792	yes	71.74	0.306667	-7.86996	yes	0.386667	0.0333333	-3.53605	no	-	AT3G21220 (E=2e-135) ATMKK5, ATMAP2K_ALPHA, MAP2K_A, MKK5, ATMEK5, MEK5 | ATMKK5 (ARABIDOPSIS THALIANA MITOGEN-ACTIVATED PROTEIN KINASE KINASE 5); MAP kinase kinase/ kinase	Organismal Systems	Environmental adaptation	ko04626//Plant-pathogen interaction	K13413	GO:0043226//organelle;GO:0005737//cytoplasm;GO:0016020//membrane;GO:0044464//cell part;GO:0044424//intracellular part;GO:0043227//membrane-bounded organelle;GO:0005622//intracellular;GO:0043229//intracellular organelle;GO:0005739//mitochondrion;GO:0044444//cytoplasmic part;GO:0005575//cellular_component;GO:0043231//intracellular membrane-bounded organelle;GO:0005623//cell	GO:0016301//kinase activity;GO:0016740//transferase activity;GO:0000166//nucleotide binding;GO:0097159//organic cyclic compound binding;GO:0036094//small molecule binding;GO:0003674//molecular_function;GO:0016787//hydrolase activity;GO:0003824//catalytic activity;GO:1901363//heterocyclic compound binding;GO:0016772//transferase activity, transferring phosphorus-containing groups;GO:0005488//bindi…	GO:0008150//biological_process;GO:0043170//macromolecule metabolic process;GO:0036211//protein modification process;GO:0044260//cellular macromolecule metabolic process;GO:0044267//cellular protein metabolic process;GO:1901360//organic cyclic compound metabolic process;GO:0006810//transport;GO:0071704//organic substance metabolic process;GO:0051234//establishment of localization;GO:0006464//cellu…
Bra001818	24.67	16.2767	-0.599952	no	27.4567	10.5333	-1.38219	yes	8.66333	3.63	-1.25495	yes	-	AT3G21220 (E=1e-162) ATMKK5, ATMAP2K_ALPHA, MAP2K_A, MKK5, ATMEK5, MEK5 | ATMKK5 (ARABIDOPSIS THALIANA MITOGEN-ACTIVATED PROTEIN KINASE KINASE 5); MAP kinase kinase/ kinase	Organismal Systems	Environmental adaptation	ko04626//Plant-pathogen interaction	K13413	-	GO:0016301//kinase activity;GO:0036094//small molecule binding;GO:1901363//heterocyclic compound binding;GO:0016740//transferase activity;GO:1901265//nucleoside phosphate binding;GO:0003824//catalytic activity;GO:0000166//nucleotide binding;GO:0005488//binding;GO:0097159//organic cyclic compound binding;GO:0003674//molecular_function;GO:0016772//transferase activity, transferring phosphorus-conta…	GO:0043412//macromolecule modification;GO:0044237//cellular metabolic process;GO:0008150//biological_process;GO:0044267//cellular protein metabolic process;GO:0009987//cellular process;GO:0044260//cellular macromolecule metabolic process;GO:0019538//protein metabolic process;GO:0044238//primary metabolic process;GO:0006464//cellular protein modification process;GO:0071704//organic substance metab…
Bra001819	9.51667	21.48	1.17447	yes	24.0867	34.0967	0.501396	no	3.75	3.94333	0.0725251	no	-	AT3G21230 (E=7e-258) 4CL5 | 4CL5 (4-coumarate:CoA ligase 5); 4-coumarate-CoA ligase	Metabolism	Metabolism of cofactors and vitamins;Amino acid metabolism;Biosynthesis of other secondary metabolites	ko00940//Phenylpropanoid biosynthesis;ko00130//Ubiquinone and other terpenoid-quinone biosynthesis;ko00360//Phenylalanine metabolism	K01904	-	GO:0003674//molecular_function;GO:0003824//catalytic activity	GO:0006950//response to stress;GO:0009058//biosynthetic process;GO:0009987//cellular process;GO:0019748//secondary metabolic process;GO:0050896//response to stimulus;GO:0044710//single-organism metabolic process;GO:0008152//metabolic process;GO:0008150//biological_process;GO:0044699//single-organism process
Bra001820	22.8567	19.2133	-0.250507	no	18.3133	13.96	-0.391595	no	1.06667	3.01333	1.49825	yes	-	AT3G21230 (E=2e-132) 4CL5 | 4CL5 (4-coumarate:CoA ligase 5); 4-coumarate-CoA ligase	Metabolism	Metabolism of cofactors and vitamins;Amino acid metabolism;Biosynthesis of other secondary metabolites	ko00940//Phenylpropanoid biosynthesis;ko00130//Ubiquinone and other terpenoid-quinone biosynthesis;ko00360//Phenylalanine metabolism	K01904	-	GO:0003674//molecular_function;GO:0003824//catalytic activity	GO:0008150//biological_process;GO:0008152//metabolic process
Bra001822	22.5467	10.3567	-1.12235	yes	10.7133	7.88333	-0.44253	no	2.98	1.06667	-1.4822	no	-	AT3G21270 (E=2e-067) ADOF2 | ADOF2; DNA binding / transcription factor	-	-	-	-	-	GO:0003674//molecular_function;GO:0005488//binding;GO:0003676//nucleic acid binding;GO:1901363//heterocyclic compound binding;GO:0003677//DNA binding;GO:0097159//organic cyclic compound binding	GO:0034641//cellular nitrogen compound metabolic process;GO:0006807//nitrogen compound metabolic process;GO:0006139//nucleobase-containing compound metabolic process;GO:0008152//metabolic process;GO:0046483//heterocycle metabolic process;GO:0009058//biosynthetic process;GO:0044237//cellular metabolic process;GO:0044238//primary metabolic process;GO:0009987//cellular process;GO:1901360//organic cy…
Bra001825	2.95333	0.126667	-4.54324	yes	3.90333	0.403333	-3.27466	no	1.21333	0.176667	-2.77987	yes	-	-	-	-	-	-	-	-	-
Bra001826	1.39333	0.001	-10.4443	yes	0.276667	0.07	-1.98272	no	0.0366667	0.001	-5.1964	no	-	AT3G21330 (E=1e-086) | basic helix-loop-helix (bHLH) family protein	-	-	-	-	-	GO:0005515//protein binding;GO:0003674//molecular_function;GO:0005488//binding	-
Bra001832	0.27	0.8	1.56704	no	0.743333	2.29333	1.62536	no	0.0166667	0.4	4.58496	yes	DXPS1	AT4G15560 (E=1e-220) CLA1, DEF, CLA, DXS, DXPS2 | CLA1 (CLOROPLASTOS ALTERADOS 1); 1-deoxy-D-xylulose-5-phosphate synthase	Metabolism	Metabolism of cofactors and vitamins;Metabolism of terpenoids and polyketides	ko00900//Terpenoid backbone biosynthesis;ko00730//Thiamine metabolism	K01662	GO:0044424//intracellular part;GO:0044444//cytoplasmic part;GO:0005737//cytoplasm;GO:0005575//cellular_component;GO:0044464//cell part;GO:0043226//organelle;GO:0005622//intracellular;GO:0009536//plastid;GO:0043231//intracellular membrane-bounded organelle;GO:0005623//cell;GO:0043229//intracellular organelle;GO:0043227//membrane-bounded organelle	GO:0016740//transferase activity;GO:0003674//molecular_function;GO:0003824//catalytic activity	GO:0009987//cellular process;GO:0009058//biosynthetic process;GO:0044710//single-organism metabolic process;GO:0044238//primary metabolic process;GO:0008152//metabolic process;GO:0071704//organic substance metabolic process;GO:0008150//biological_process;GO:0006629//lipid metabolic process;GO:0044699//single-organism process
Bra001840	0.173333	1.19	2.77934	yes	16.69	20.0733	0.266296	no	1.19667	1.13	-0.0826986	no	-	AT3G21690 (E=1e-210) | MATE efflux family protein	-	-	-	-	GO:0016020//membrane;GO:0005575//cellular_component	GO:0003674//molecular_function;GO:0005215//transporter activity	GO:0008150//biological_process;GO:0009987//cellular process;GO:0051234//establishment of localization;GO:0051179//localization;GO:0006810//transport
Bra001842	33.2033	20.8967	-0.668055	no	140.737	35.4667	-1.98846	yes	23.1467	9.56333	-1.27522	yes	-	-	-	-	-	-	-	-	-
Bra001845	9.76	0.846667	-3.52702	yes	9.86333	0.846667	-3.54221	yes	14.7833	5.45667	-1.43788	yes	-	AT3G21760 (E=1e-224) | UDP-glucoronosyl/UDP-glucosyl transferase family protein	-	-	-	-	-	GO:0003674//molecular_function;GO:0003824//catalytic activity;GO:0016740//transferase activity	GO:0008150//biological_process;GO:0008152//metabolic process
Bra001852	28.6	5.52667	-2.37153	yes	3.14667	2.27	-0.471132	no	601.86	506.613	-0.248543	no	-	-	-	-	-	-	-	-	-
Bra001882	28.9967	15.28	-0.924243	no	20.0967	11.0933	-0.857263	no	44.3833	8.08667	-2.4564	yes	-	AT3G22680 (E=6e-068) | unknown protein	-	-	-	-	GO:0005575//cellular_component;GO:0043227//membrane-bounded organelle;GO:0005623//cell;GO:0005622//intracellular;GO:0044464//cell part;GO:0043229//intracellular organelle;GO:0005634//nucleus;GO:0043231//intracellular membrane-bounded organelle;GO:0044424//intracellular part;GO:0043226//organelle	-	GO:0044237//cellular metabolic process;GO:0006807//nitrogen compound metabolic process;GO:0008150//biological_process;GO:1901360//organic cyclic compound metabolic process;GO:0009987//cellular process;GO:0034641//cellular nitrogen compound metabolic process;GO:0043170//macromolecule metabolic process;GO:0044238//primary metabolic process;GO:0071704//organic substance metabolic process;GO:0090304/…
Bra001884	6.33	4.27667	-0.565719	no	5.95	4.89	-0.283055	no	3.01333	1.43667	-1.06863	yes	-	-	-	-	-	-	-	-	-
Bra001888	1.91	1.27333	-0.584963	no	7.66	2.43333	-1.65441	yes	0.33	0.126667	-1.38143	no	-	AT3G22845 (E=3e-107) | emp24/gp25L/p24 protein-related	-	-	-	-	GO:0016020//membrane;GO:0005575//cellular_component	-	GO:0006810//transport;GO:0008150//biological_process;GO:0051179//localization;GO:0051234//establishment of localization
Bra001891	10.19	28.9433	1.50608	yes	18.6233	24.8	0.413229	no	41.03	23.19	-0.823176	no	-	AT3G22890 (E=3e-252) APS1 | APS1 (ATP SULFURYLASE 1); sulfate adenylyltransferase (ATP)	Metabolism	Nucleotide metabolism;Energy metabolism;Metabolism of other amino acids;Biosynthesis of other secondary metabolites	ko00230//Purine metabolism;ko00920//Sulfur metabolism;ko00450//Selenocompound metabolism;ko00261//Monobactam biosynthesis	K13811	-	GO:0003674//molecular_function;GO:0003824//catalytic activity;GO:0016740//transferase activity	GO:0008150//biological_process;GO:0009987//cellular process;GO:0008152//metabolic process
Bra001899	1.53333	0.001	-10.5825	yes	0.16	0.0666667	-1.26303	no	1.65333	0.716667	-1.206	no	-	AT3G23030 (E=1e-081) IAA2 | IAA2 (INDOLE-3-ACETIC ACID INDUCIBLE 2); transcription factor	Environmental Information Processing	Signal transduction	ko04075//Plant hormone signal transduction	K14484	GO:0043226//organelle;GO:0005575//cellular_component;GO:0005634//nucleus;GO:0043227//membrane-bounded organelle;GO:0005623//cell;GO:0044464//cell part;GO:0005622//intracellular;GO:0044424//intracellular part;GO:0043229//intracellular organelle;GO:0043231//intracellular membrane-bounded organelle	GO:0005515//protein binding;GO:0005488//binding;GO:0003674//molecular_function	GO:0009058//biosynthetic process;GO:0050896//response to stimulus;GO:0044763//single-organism cellular process;GO:0006807//nitrogen compound metabolic process;GO:0071704//organic substance metabolic process;GO:0065007//biological regulation;GO:0009987//cellular process;GO:0044238//primary metabolic process;GO:0046483//heterocycle metabolic process;GO:0008150//biological_process;GO:0006139//nucleo…
Bra001900	0.001	0.223333	7.80305	no	7.73	2.1	-1.88008	no	16.15	2.56667	-2.65357	yes	-	AT3G23050 (E=2e-110) IAA7, AXR2 | IAA7 (INDOLE-3-ACETIC ACID 7); transcription factor	Environmental Information Processing	Signal transduction	ko04075//Plant hormone signal transduction	K14484	GO:0043231//intracellular membrane-bounded organelle;GO:0005622//intracellular;GO:0044424//intracellular part;GO:0043229//intracellular organelle;GO:0043227//membrane-bounded organelle;GO:0043226//organelle;GO:0005623//cell;GO:0044464//cell part;GO:0005634//nucleus;GO:0005575//cellular_component	GO:0003674//molecular_function;GO:0005515//protein binding;GO:0005488//binding	GO:0050789//regulation of biological process;GO:0044237//cellular metabolic process;GO:1901360//organic cyclic compound metabolic process;GO:0006807//nitrogen compound metabolic process;GO:0050794//regulation of cellular process;GO:0051716//cellular response to stimulus;GO:0008150//biological_process;GO:0044700//single organism signaling;GO:0009719//response to endogenous stimulus;GO:0009058//bio…
Bra001903	0.106667	1.13	3.40514	yes	0.116667	0.923333	2.98446	yes	0.316667	2.18667	2.7877	yes	-	AT3G16030 (E=1e-191) CES101 | CES101 (CALLUS EXPRESSION OF RBCS 101); ATP binding / carbohydrate binding / kinase/ protein kinase/ protein serine/threonine kinase/ protein tyrosine kinase/ sugar binding	-	-	-	-	-	GO:0003824//catalytic activity;GO:0097159//organic cyclic compound binding;GO:0005488//binding;GO:0016740//transferase activity;GO:0016772//transferase activity, transferring phosphorus-containing groups;GO:1901265//nucleoside phosphate binding;GO:0000166//nucleotide binding;GO:0036094//small molecule binding;GO:1901363//heterocyclic compound binding;GO:0003674//molecular_function;GO:0016301//kin…	GO:0019538//protein metabolic process;GO:0006464//cellular protein modification process;GO:0044260//cellular macromolecule metabolic process;GO:0036211//protein modification process;GO:0071704//organic substance metabolic process;GO:0009987//cellular process;GO:0008150//biological_process;GO:0043170//macromolecule metabolic process;GO:0008152//metabolic process;GO:0043412//macromolecule modificat…
Bra001905	9.53	2.50333	-1.92863	yes	26.13	7.77	-1.74972	yes	11.7133	13.08	0.159211	no	-	-	-	-	-	-	-	-	-
Bra001915	0.706667	0.001	-9.46489	no	1.95667	0.0766667	-4.67365	yes	0.08	0.001	-6.32193	no	-	AT3G23605 (E=4e-037) | UBX domain-containing protein	-	-	-	-	-	GO:0003674//molecular_function;GO:0005515//protein binding;GO:0005488//binding	-
Bra001917	0.001	0.06	5.90689	no	0.001	0.001	0	notest	0.001	0.673333	9.39518	yes	-	AT1G66390 (E=5e-110) ATMYB90, PAP2, MYB90 | MYB90 (MYB DOMAIN PROTEIN 90); DNA binding / transcription factor	-	-	-	-	-	GO:0003682//chromatin binding;GO:0003676//nucleic acid binding;GO:0003674//molecular_function;GO:1901363//heterocyclic compound binding;GO:0005488//binding;GO:0097159//organic cyclic compound binding;GO:0003677//DNA binding;GO:0044877//macromolecular complex binding	GO:0008152//metabolic process;GO:0008150//biological_process;GO:0009058//biosynthetic process
Bra001919	1.54	2.20667	0.518938	no	5.53667	3.31	-0.742186	no	3.28	7.69333	1.22991	yes	AAE16	AT3G23790 (E=0.0) | AMP-binding protein, putative	Cellular Processes;Metabolism	Global and Overview;Transport and catabolism;Lipid metabolism	ko04146//Peroxisome;ko01212//Fatty acid metabolism;ko00071//Fatty acid degradation;ko00061//Fatty acid biosynthesis	K01897	GO:0043231//intracellular membrane-bounded organelle;GO:0043229//intracellular organelle;GO:0043227//membrane-bounded organelle;GO:0005622//intracellular;GO:0005623//cell;GO:0043226//organelle;GO:0044444//cytoplasmic part;GO:0044464//cell part;GO:0044424//intracellular part;GO:0009536//plastid;GO:0005737//cytoplasm;GO:0005575//cellular_component	GO:0003824//catalytic activity;GO:0003674//molecular_function	GO:0008150//biological_process;GO:0008152//metabolic process
Bra001937	3.7	29.4533	2.99283	yes	5.6	27.41	2.2912	yes	2.45333	18.79	2.93715	yes	-	AT3G23920 (E=1e-263) BAM1, BMY7, TR-BAMY | BAM1 (BETA-AMYLASE 1); beta-amylase	Metabolism	Carbohydrate metabolism	ko00500//Starch and sucrose metabolism	K01177	-	GO:0003674//molecular_function;GO:0003824//catalytic activity;GO:0016787//hydrolase activity	GO:0008150//biological_process;GO:0009056//catabolic process;GO:0008152//metabolic process;GO:0044238//primary metabolic process;GO:0005975//carbohydrate metabolic process;GO:0071704//organic substance metabolic process
Bra001953	9.52	2.64667	-1.84679	yes	7.91333	11.08	0.4856	no	4.18333	2.65333	-0.656847	no	-	AT2G15970 (E=2e-070) COR413-PM1, WCOR413, WCOR413-LIKE, ATCOR413-PM1, FL3-5A3 | COR413-PM1	-	-	-	-	GO:0016020//membrane;GO:0005575//cellular_component	-	-
Bra001958	28.96	22.91	-0.338084	no	22.4233	15.5933	-0.524071	no	60.1	9.40333	-2.67612	yes	GLB1	AT2G16060 (E=2e-081) GLB1, AHB1, ARATH GLB1, NSHB1, ATGLB1 | AHB1 (ARABIDOPSIS HEMOGLOBIN 1); oxygen binding / oxygen transporter	-	-	-	-	GO:0005737//cytoplasm;GO:0030312//external encapsulating structure;GO:0044464//cell part;GO:0005575//cellular_component;GO:0044444//cytoplasmic part;GO:0005623//cell;GO:0016020//membrane;GO:0044424//intracellular part;GO:0005829//cytosol;GO:0005886//plasma membrane;GO:0005618//cell wall;GO:0071944//cell periphery;GO:0005622//intracellular	GO:0003674//molecular_function;GO:0005488//binding;GO:0019825//oxygen binding	GO:0006950//response to stress;GO:0050896//response to stimulus;GO:0009987//cellular process;GO:0007154//cell communication;GO:0044763//single-organism cellular process;GO:0008152//metabolic process;GO:0065007//biological regulation;GO:0044699//single-organism process;GO:0051179//localization;GO:0009605//response to external stimulus;GO:0007165//signal transduction;GO:0008150//biological_process;…
Bra001973	3.63333	3.01	-0.27153	no	6.55667	8.38	0.353988	no	0.473333	0.0566667	-3.06228	yes	-	AT2G16270 (E=1e-101) | unknown protein	-	-	-	-	-	-	GO:0007049//cell cycle;GO:0071840//cellular component organization or biogenesis;GO:0009987//cellular process;GO:0016043//cellular component organization;GO:0008150//biological_process;GO:0044699//single-organism process;GO:0044763//single-organism cellular process
Bra001983	0.856667	0.316667	-1.43577	no	2.30333	0.46	-2.32402	yes	0.733333	0.193333	-1.92338	no	-	-	-	-	-	-	-	-	-
Bra001986	5.66	33.64	2.5713	yes	2.92	24.08	3.0438	yes	0.603333	0.26	-1.21444	no	-	AT5G42180 (E=1e-156) | peroxidase 64 (PER64) (P64) (PRXR4)	Metabolism	Biosynthesis of other secondary metabolites	ko00940//Phenylpropanoid biosynthesis	K00430	-	GO:0003674//molecular_function;GO:0005488//binding;GO:0003824//catalytic activity	GO:0050896//response to stimulus;GO:0008150//biological_process;GO:0006950//response to stress;GO:0008152//metabolic process
Bra002002	0.226667	0.04	-2.5025	no	1.73	9.30667	2.42749	yes	0.28	0.0866667	-1.69188	no	-	AT2G16890 (E=7e-143) | UDP-glucoronosyl/UDP-glucosyl transferase family protein	-	-	-	-	-	GO:0003674//molecular_function;GO:0016740//transferase activity;GO:0003824//catalytic activity	GO:0008152//metabolic process;GO:0008150//biological_process
Bra002003	3.92667	1.21667	-1.69037	yes	2.85	1.46333	-0.961703	no	0.92	0.37	-1.31411	no	-	AT2G16900 (E=1e-114) | FUNCTIONS IN: molecular_function unknown; INVOLVED IN: biological_process unknown; LOCATED IN: plasma membrane; EXPRESSED IN: 24 plant structures; EXPRESSED DURING: 13 growth stages; CONTAINS InterPro DOMAIN/s: Phospholipase-like, arabidopsis (InterPro:IPR007942); BEST Arabidopsis thaliana protein match is: unknown protein (TAIR:AT4G35110.4); Has 353 Blast hits to 254 prote…	-	-	-	-	-	GO:0003674//molecular_function;GO:0003682//chromatin binding;GO:0005488//binding;GO:0044877//macromolecular complex binding	GO:0071840//cellular component organization or biogenesis;GO:0016043//cellular component organization;GO:0044763//single-organism cellular process;GO:0009987//cellular process;GO:0008152//metabolic process;GO:0007049//cell cycle;GO:0044699//single-organism process;GO:0008150//biological_process
Bra002039	0.28	0.253333	-0.14439	no	1.64333	0.28	-2.55313	yes	3.17	17.4933	2.46425	yes	-	-	-	-	-	-	-	-	-
Bra002046	1.77333	8.92667	2.33166	yes	14.9733	32.14	1.10197	yes	0.12	0.916667	2.93336	yes	CYCB1;3	AT3G11520 (E=5e-142) CYCB1;3, CYC2 | CYCB1;3 (CYCLIN B1;3); cyclin-dependent protein kinase regulator	-	-	-	-	GO:0043227//membrane-bounded organelle;GO:0005575//cellular_component;GO:0005623//cell;GO:0044464//cell part;GO:0005634//nucleus;GO:0044424//intracellular part;GO:0043226//organelle;GO:0005622//intracellular;GO:0043231//intracellular membrane-bounded organelle;GO:0043229//intracellular organelle	GO:0005488//binding;GO:0005515//protein binding;GO:0003674//molecular_function	GO:0048731//system development;GO:0044699//single-organism process;GO:0003006//developmental process involved in reproduction;GO:0044237//cellular metabolic process;GO:0071840//cellular component organization or biogenesis;GO:0043412//macromolecule modification;GO:0090304//nucleic acid metabolic process;GO:0006259//DNA metabolic process;GO:0043170//macromolecule metabolic process;GO:0032501//mult…
Bra002063	4.36	1.5	-1.53937	yes	4.08667	1.45667	-1.48825	no	0.45	0.116667	-1.94753	no	-	AT2G17480 (E=9e-251) MLO8, ATMLO8 | MLO8 (MILDEW RESISTANCE LOCUS O 8); calmodulin binding	-	-	-	-	GO:0016020//membrane;GO:0005575//cellular_component	GO:0005515//protein binding;GO:0005488//binding;GO:0003674//molecular_function	GO:0009607//response to biotic stimulus;GO:0006950//response to stress;GO:0050896//response to stimulus;GO:0008150//biological_process
Bra002080	63.8667	35.0833	-0.864277	no	253.793	40.1467	-2.6603	yes	35.5433	9.93667	-1.83875	yes	-	-	-	-	-	-	-	-	-
Bra002085	0.0133333	0.0466667	1.80735	no	0.0266667	0.316667	3.56986	yes	0.93	0.976667	0.0706355	no	-	AT1G45616 (E=1e-233) AtRLP6 | AtRLP6 (Receptor Like Protein 6); protein binding	-	-	-	-	-	GO:0005488//binding;GO:0005515//protein binding;GO:0003674//molecular_function	-
Bra002098	6.42667	3.25	-0.983631	no	32.39	9.02333	-1.84382	yes	0.313333	0.23	-0.446064	no	-	-	-	-	-	-	-	-	-
Bra002101	28.0167	7.52667	-1.8962	yes	29.3633	7.31667	-2.00476	yes	19.0067	3.90667	-2.2825	yes	-	AT5G17710 (E=2e-105) EMB1241 | EMB1241 (embryo defective 1241); adenyl-nucleotide exchange factor/ chaperone binding / protein binding / protein homodimerization	-	-	-	-	GO:0005575//cellular_component;GO:0005623//cell;GO:0043226//organelle;GO:0044444//cytoplasmic part;GO:0005739//mitochondrion;GO:0043231//intracellular membrane-bounded organelle;GO:0005622//intracellular;GO:0044464//cell part;GO:0044424//intracellular part;GO:0043229//intracellular organelle;GO:0043227//membrane-bounded organelle;GO:0005737//cytoplasm	GO:0005515//protein binding;GO:0097159//organic cyclic compound binding;GO:0000166//nucleotide binding;GO:0030234//enzyme regulator activity;GO:0003674//molecular_function;GO:0036094//small molecule binding;GO:1901265//nucleoside phosphate binding;GO:1901363//heterocyclic compound binding;GO:0098772//molecular function regulator;GO:0005488//binding	GO:0009987//cellular process;GO:0008150//biological_process
Bra002112	0.316667	0.316667	0	no	0.0633333	0.12	0.921997	no	2.58333	0.713333	-1.85659	yes	-	AT5G17860 (E=2e-264) CAX7 | CAX7 (calcium exchanger 7); calcium:sodium antiporter/ cation:cation antiporter	-	-	-	-	GO:0016020//membrane;GO:0005575//cellular_component	-	GO:0051179//localization;GO:0006810//transport;GO:0009987//cellular process;GO:0008150//biological_process;GO:0051234//establishment of localization
Bra002113	0.72	1.11667	0.63313	no	1.59333	4.21667	1.40405	no	1.73	0.001	-10.7566	yes	-	AT5G17870 (E=5e-044) PSRP6 | PSRP6 (PLASTID-SPECIFIC 50S RIBOSOMAL PROTEIN 6)	-	-	-	-	GO:0043232//intracellular non-membrane-bounded organelle;GO:0043228//non-membrane-bounded organelle;GO:0043227//membrane-bounded organelle;GO:0043226//organelle;GO:0043231//intracellular membrane-bounded organelle;GO:0044444//cytoplasmic part;GO:0044424//intracellular part;GO:1990904//ribonucleoprotein complex;GO:0043229//intracellular organelle;GO:0005622//intracellular;GO:0005623//cell;GO:00055…	GO:0005198//structural molecule activity;GO:0005488//binding;GO:0003676//nucleic acid binding;GO:0003674//molecular_function;GO:1901363//heterocyclic compound binding;GO:0097159//organic cyclic compound binding;GO:0003723//RNA binding	GO:0010467//gene expression;GO:0008150//biological_process;GO:0008152//metabolic process;GO:1901576//organic substance biosynthetic process;GO:0034641//cellular nitrogen compound metabolic process;GO:0044271//cellular nitrogen compound biosynthetic process;GO:0044237//cellular metabolic process;GO:0009058//biosynthetic process;GO:0044267//cellular protein metabolic process;GO:0044260//cellular ma…
Bra002132	12.3333	4.57333	-1.43124	yes	2.71	1.38667	-0.966672	no	0.12	0.216667	0.852443	no	-	AT5G18090 (E=2e-085) | transcriptional factor B3 family protein	-	-	-	-	GO:0005634//nucleus;GO:0005575//cellular_component;GO:0005622//intracellular;GO:0005623//cell;GO:0044424//intracellular part;GO:0043226//organelle;GO:0044464//cell part;GO:0043227//membrane-bounded organelle;GO:0043231//intracellular membrane-bounded organelle;GO:0043229//intracellular organelle	GO:0003674//molecular_function;GO:0003677//DNA binding;GO:0097159//organic cyclic compound binding;GO:1901363//heterocyclic compound binding;GO:0003676//nucleic acid binding;GO:0005488//binding	GO:0006725//cellular aromatic compound metabolic process;GO:0008152//metabolic process;GO:0009058//biosynthetic process;GO:0034641//cellular nitrogen compound metabolic process;GO:0071704//organic substance metabolic process;GO:0044237//cellular metabolic process;GO:0006139//nucleobase-containing compound metabolic process;GO:1901360//organic cyclic compound metabolic process;GO:0009987//cellular…
Bra002137	29.0233	2.58333	-3.48991	yes	26.29	2.74	-3.26227	yes	11.35	1.73	-2.71385	yes	-	AT5G18140 (E=5e-112) | DNAJ heat shock N-terminal domain-containing protein	-	-	-	-	GO:0044444//cytoplasmic part;GO:0044424//intracellular part;GO:0043229//intracellular organelle;GO:0005622//intracellular;GO:0009536//plastid;GO:0043227//membrane-bounded organelle;GO:0005575//cellular_component;GO:0043231//intracellular membrane-bounded organelle;GO:0005623//cell;GO:0043226//organelle;GO:0005737//cytoplasm;GO:0044464//cell part	-	-
Bra002159	0.04	0.001	-5.32193	no	0.0366667	0.0466667	0.347923	no	9.33333	64.0967	2.77979	yes	-	AT5G18450 (E=7e-123) | AP2 domain-containing transcription factor, putative	-	-	-	-	GO:0044464//cell part;GO:0043229//intracellular organelle;GO:0005623//cell;GO:0044424//intracellular part;GO:0043226//organelle;GO:0005622//intracellular;GO:0005634//nucleus;GO:0043227//membrane-bounded organelle;GO:0043231//intracellular membrane-bounded organelle;GO:0005575//cellular_component	GO:0005488//binding;GO:0003700//transcription factor activity, sequence-specific DNA binding;GO:0001071//nucleic acid binding transcription factor activity;GO:0003676//nucleic acid binding;GO:0003674//molecular_function;GO:0003677//DNA binding;GO:0097159//organic cyclic compound binding;GO:1901363//heterocyclic compound binding	GO:1901360//organic cyclic compound metabolic process;GO:0006807//nitrogen compound metabolic process;GO:0044238//primary metabolic process;GO:0046483//heterocycle metabolic process;GO:0034641//cellular nitrogen compound metabolic process;GO:0009987//cellular process;GO:0006139//nucleobase-containing compound metabolic process;GO:0009058//biosynthetic process;GO:0008152//metabolic process;GO:0044…
Bra002162	6.71333	8.10333	0.271486	no	4.55667	6.43	0.49684	no	1.99333	6.46	1.69635	yes	-	AT5G18490 (E=7e-292) | unknown protein	-	-	-	-	-	-	GO:0051716//cellular response to stimulus;GO:0044763//single-organism cellular process;GO:0008150//biological_process;GO:0050896//response to stimulus;GO:0044699//single-organism process;GO:0007154//cell communication;GO:0007165//signal transduction;GO:0044700//single organism signaling;GO:0065007//biological regulation;GO:0009719//response to endogenous stimulus;GO:0050789//regulation of biologi…
Bra002174	8.19	0.83	-3.30268	yes	7.43	1.01333	-2.87425	yes	5.7	0.756667	-2.91323	yes	-	AT5G18630 (E=2e-176) | lipase class 3 family protein	-	-	-	-	-	GO:0003824//catalytic activity;GO:0003674//molecular_function;GO:0016787//hydrolase activity	GO:0044238//primary metabolic process;GO:0008150//biological_process;GO:0008152//metabolic process;GO:0044699//single-organism process;GO:0071704//organic substance metabolic process;GO:0044710//single-organism metabolic process;GO:0006629//lipid metabolic process
Bra002177	7.80667	11.2367	0.525436	no	13.5433	18.8	0.47315	no	5.54	2.59	-1.09693	yes	-	AT5G18660 (E=1e-192) PCB2 | PCB2 (PALE-GREEN AND CHLOROPHYLL B REDUCED 2); 3,8-divinyl protochlorophyllide a 8-vinyl reductase	Metabolism	Metabolism of cofactors and vitamins	ko00860//Porphyrin and chlorophyll metabolism	K19073	GO:0043227//membrane-bounded organelle;GO:0005622//intracellular;GO:0016020//membrane;GO:0005737//cytoplasm;GO:0005575//cellular_component;GO:0044464//cell part;GO:0005623//cell;GO:0009536//plastid;GO:0043231//intracellular membrane-bounded organelle;GO:0043226//organelle;GO:0044444//cytoplasmic part;GO:0009579//thylakoid;GO:0043229//intracellular organelle;GO:0044424//intracellular part	GO:0003824//catalytic activity;GO:0003674//molecular_function	GO:0008150//biological_process;GO:0044699//single-organism process;GO:0032501//multicellular organismal process;GO:0008152//metabolic process;GO:0071704//organic substance metabolic process;GO:0006807//nitrogen compound metabolic process;GO:0044237//cellular metabolic process;GO:0048856//anatomical structure development;GO:0009653//anatomical structure morphogenesis;GO:0044238//primary metabolic …
Bra002178	10.32	8.71333	-0.244146	no	14.5633	8.63667	-0.753794	no	27.3933	10.1967	-1.42573	yes	-	AT5G18670 (E=3e-257) BMY3, BAM9 | BMY3; beta-amylase/ catalytic/ cation binding	-	-	-	-	-	GO:0003674//molecular_function;GO:0016787//hydrolase activity;GO:0003824//catalytic activity	GO:0071704//organic substance metabolic process;GO:0005975//carbohydrate metabolic process;GO:0009056//catabolic process;GO:0008152//metabolic process;GO:0008150//biological_process;GO:0044238//primary metabolic process
Bra002196	2.78	4.71667	0.762683	no	4.1	7.02333	0.776532	no	1.42	4.20667	1.56679	yes	-	AT5G18950 (E=2e-167) | pentatricopeptide (PPR) repeat-containing protein	-	-	-	-	-	-	GO:0044238//primary metabolic process;GO:1901360//organic cyclic compound metabolic process;GO:0009628//response to abiotic stimulus;GO:0090304//nucleic acid metabolic process;GO:0046483//heterocycle metabolic process;GO:0071704//organic substance metabolic process;GO:0016043//cellular component organization;GO:0009987//cellular process;GO:0044260//cellular macromolecule metabolic process;GO:0071…
Bra002198	0.756667	0.516667	-0.550424	no	0.63	0.213333	-1.56224	no	1.54	4.91	1.67279	yes	-	-	-	-	-	-	-	-	-
Bra002214	40.66	50.2733	0.306183	no	67.4433	47.9533	-0.492045	no	32.7133	9.29667	-1.81509	yes	-	AT5G19120 (E=2e-148) | aspartic-type endopeptidase	-	-	-	-	-	GO:0016787//hydrolase activity;GO:0003824//catalytic activity;GO:0003674//molecular_function	GO:0071704//organic substance metabolic process;GO:0008150//biological_process;GO:0008152//metabolic process;GO:0044238//primary metabolic process;GO:0043170//macromolecule metabolic process;GO:0019538//protein metabolic process
Bra002235	1.98333	0.646667	-1.61683	yes	1.4	0.356667	-1.97278	yes	0.863333	0.45	-0.939993	no	-	AT5G19420 (E=0.0) | Ran GTPase binding / chromatin binding / zinc ion binding	-	-	-	-	-	GO:0005488//binding;GO:0003674//molecular_function	-
Bra002236	216.507	164.277	-0.398284	no	76.15	107.957	0.503536	no	42.4767	20.2433	-1.06922	yes	-	AT5G19440 (E=7e-172) | cinnamyl-alcohol dehydrogenase, putative (CAD)	-	-	-	-	GO:0005886//plasma membrane;GO:0005737//cytoplasm;GO:0005623//cell;GO:0016020//membrane;GO:0043231//intracellular membrane-bounded organelle;GO:0043226//organelle;GO:0043227//membrane-bounded organelle;GO:0005575//cellular_component;GO:0044464//cell part;GO:0071944//cell periphery;GO:0044444//cytoplasmic part;GO:0012505//endomembrane system;GO:0005794//Golgi apparatus;GO:0044424//intracellular pa…	GO:0003674//molecular_function;GO:0003824//catalytic activity;GO:0005488//binding	GO:0008150//biological_process;GO:0008152//metabolic process;GO:0009987//cellular process
Bra002238	3.81667	0.803333	-2.24824	yes	2.48667	0.456667	-2.445	yes	0.466667	0.203333	-1.19855	no	-	AT5G19460 (E=2e-134) atnudt20 | atnudt20 (Arabidopsis thaliana Nudix hydrolase homolog 20); hydrolase	-	-	-	-	-	GO:0003674//molecular_function;GO:0003824//catalytic activity;GO:0016787//hydrolase activity	-
Bra002239	20.7067	7.11333	-1.5415	yes	5.95333	5.63667	-0.0788554	no	8.5	4.22	-1.01022	no	-	AT5G19480 (E=2e-054) | unknown protein	-	-	-	-	-	-	GO:0009058//biosynthetic process;GO:0005975//carbohydrate metabolic process;GO:0008150//biological_process;GO:0009987//cellular process;GO:0008152//metabolic process;GO:0044238//primary metabolic process;GO:0071704//organic substance metabolic process
Bra002245	59.6567	294.503	2.30353	yes	85.3633	315.997	1.88822	yes	23.15	69.9867	1.59607	yes	-	AT5G19550 (E=7e-220) ASP2, AAT2 | ASP2 (ASPARTATE AMINOTRANSFERASE 2); L-aspartate:2-oxoglutarate aminotransferase	Metabolism	Amino acid metabolism;Global and Overview;Energy metabolism;Biosynthesis of other secondary metabolites	ko01200//Carbon metabolism;ko01230//Biosynthesis of amino acids;ko00270//Cysteine and methionine metabolism;ko01210//2-Oxocarboxylic acid metabolism;ko00710//Carbon fixation in photosynthetic organisms;ko00330//Arginine and proline metabolism;ko00250//Alanine, aspartate and glutamate metabolism;ko00400//Phenylalanine, tyrosine and tryptophan biosynthesis;ko00360//Phenylalanine metabolism;ko00350/…	K14454	-	GO:0003674//molecular_function;GO:0003824//catalytic activity;GO:0005488//binding;GO:0016740//transferase activity	GO:0008150//biological_process;GO:0009987//cellular process;GO:0009058//biosynthetic process;GO:0008152//metabolic process
Bra002260	0.0566667	69.05	10.2509	yes	0.286667	107.443	8.54999	yes	0.143333	25.35	7.46647	yes	-	AT5G19770 (E=3e-139) TUA3 | TUA3; structural constituent of cytoskeleton	Cellular Processes	Transport and catabolism	ko04145//Phagosome	K07374	GO:0043228//non-membrane-bounded organelle;GO:0043226//organelle;GO:0005575//cellular_component;GO:0044424//intracellular part;GO:0044464//cell part;GO:0043232//intracellular non-membrane-bounded organelle;GO:0005856//cytoskeleton;GO:0005623//cell;GO:0005622//intracellular;GO:0043229//intracellular organelle	GO:0003674//molecular_function;GO:0036094//small molecule binding;GO:0000166//nucleotide binding;GO:0005198//structural molecule activity;GO:1901265//nucleoside phosphate binding;GO:0003824//catalytic activity;GO:0016787//hydrolase activity;GO:1901363//heterocyclic compound binding;GO:0005488//binding;GO:0097159//organic cyclic compound binding	GO:0009987//cellular process;GO:0008150//biological_process;GO:0016043//cellular component organization;GO:0071840//cellular component organization or biogenesis
Bra002261	240.087	81.2067	-1.56389	yes	252.743	86.4333	-1.54801	yes	106.143	33.6567	-1.65705	yes	-	AT5G19770 (E=6e-236) TUA3 | TUA3; structural constituent of cytoskeleton	Cellular Processes	Transport and catabolism	ko04145//Phagosome	K07374	GO:0043229//intracellular organelle;GO:0043228//non-membrane-bounded organelle;GO:0043232//intracellular non-membrane-bounded organelle;GO:0005623//cell;GO:0043226//organelle;GO:0005622//intracellular;GO:0044424//intracellular part;GO:0005575//cellular_component;GO:0005856//cytoskeleton;GO:0044464//cell part	GO:0000166//nucleotide binding;GO:0005488//binding;GO:0005198//structural molecule activity;GO:0003824//catalytic activity;GO:0016787//hydrolase activity;GO:0003674//molecular_function;GO:1901363//heterocyclic compound binding;GO:0036094//small molecule binding;GO:1901265//nucleoside phosphate binding;GO:0097159//organic cyclic compound binding	GO:0016043//cellular component organization;GO:0009987//cellular process;GO:0008150//biological_process;GO:0071840//cellular component organization or biogenesis
Bra002267	3.37	0.2	-4.07468	yes	2.55	0.03	-6.40939	yes	2.26333	0.001	-11.1442	yes	-	AT3G26010 (E=3e-100) | F-box family protein	-	-	-	-	-	GO:0005488//binding;GO:0003674//molecular_function;GO:0005515//protein binding	-
Bra002281	13.09	43.7667	1.74137	yes	24.5833	54.7567	1.15535	yes	11.0367	32.9033	1.57593	yes	-	-	-	-	-	-	-	-	-
Bra002283	30.6867	17.1567	-0.838843	no	8.71	3.78667	-1.20174	no	6.52333	0.93	-2.81031	yes	-	AT5G20230 (E=9e-053) ATBCB, BCB | ATBCB (ARABIDOPSIS BLUE-COPPER-BINDING PROTEIN); copper ion binding / electron carrier	-	-	-	-	-	GO:0005488//binding;GO:0003674//molecular_function	-
Bra002286	7.12333	8.74	0.295081	no	15.0867	6.58667	-1.19565	yes	12.92	9.74333	-0.407119	no	-	AT5G20250 (E=0.0) DIN10 | DIN10 (DARK INDUCIBLE 10); hydrolase, hydrolyzing O-glycosyl compounds	Metabolism	Carbohydrate metabolism	ko00052//Galactose metabolism	K06617	-	GO:0003824//catalytic activity;GO:0003674//molecular_function	GO:0008150//biological_process;GO:0008152//metabolic process
Bra002290	101.41	340.107	1.74579	yes	137.303	407.17	1.56826	yes	51.15	114.893	1.16749	yes	-	AT5G20290 (E=4e-087) | 40S ribosomal protein S8 (RPS8A)	Genetic Information Processing	Translation	ko03010//Ribosome	K02995	GO:0005622//intracellular;GO:0043228//non-membrane-bounded organelle;GO:0044444//cytoplasmic part;GO:0044424//intracellular part;GO:0043226//organelle;GO:0005737//cytoplasm;GO:0043229//intracellular organelle;GO:1990904//ribonucleoprotein complex;GO:0043232//intracellular non-membrane-bounded organelle;GO:0005575//cellular_component;GO:0005840//ribosome;GO:0030529//intracellular ribonucleoprotein…	GO:0003674//molecular_function;GO:0005198//structural molecule activity	GO:0043603//cellular amide metabolic process;GO:0009058//biosynthetic process;GO:1901576//organic substance biosynthetic process;GO:0019538//protein metabolic process;GO:0009987//cellular process;GO:0043170//macromolecule metabolic process;GO:0043043//peptide biosynthetic process;GO:0008152//metabolic process;GO:0034641//cellular nitrogen compound metabolic process;GO:0044238//primary metabolic p…
Bra002320	2.23667	4.99	1.15769	yes	3.55667	7.45333	1.06736	no	2.27667	6.56667	1.52824	yes	-	-	-	-	-	-	-	-	-
Bra002322	103.537	72.1433	-0.521204	no	151.167	54.0233	-1.48449	yes	24.2067	15.3167	-0.660302	no	-	-	-	-	-	-	-	-	-
Bra002334	12.3167	4.24333	-1.53734	yes	8.16333	5.64333	-0.532611	no	1.5	1.29333	-0.213868	no	-	AT5G20850 (E=1e-189) ATRAD51, RAD51 | ATRAD51; ATP binding / DNA binding / DNA-dependent ATPase/ damaged DNA binding / nucleoside-triphosphatase/ nucleotide binding / protein binding / sequence-specific DNA binding	Genetic Information Processing	Replication and repair	ko03440//Homologous recombination	K04482	-	GO:0016787//hydrolase activity;GO:0097159//organic cyclic compound binding;GO:0000166//nucleotide binding;GO:1901265//nucleoside phosphate binding;GO:0036094//small molecule binding;GO:0003676//nucleic acid binding;GO:1901363//heterocyclic compound binding;GO:0005488//binding;GO:0003677//DNA binding;GO:0003824//catalytic activity;GO:0003674//molecular_function	GO:0071704//organic substance metabolic process;GO:0046483//heterocycle metabolic process;GO:0044238//primary metabolic process;GO:0006259//DNA metabolic process;GO:0090304//nucleic acid metabolic process;GO:0044260//cellular macromolecule metabolic process;GO:0034641//cellular nitrogen compound metabolic process;GO:0006725//cellular aromatic compound metabolic process;GO:0009058//biosynthetic pr…
Bra002347	0.001	0.326667	8.35168	yes	0.0366667	0.62	4.07973	yes	0.001	0.0266667	4.73697	no	-	AT5G20960 (E=0.0) AAO1, AO1, ATAO, ATAO1 | AAO1 (ARABIDOPSIS ALDEHYDE OXIDASE 1); aldehyde oxidase/ indole-3-acetaldehyde oxidase	Metabolism	Amino acid metabolism	ko00380//Tryptophan metabolism	K11817	-	GO:0036094//small molecule binding;GO:0003674//molecular_function;GO:0005488//binding;GO:1901363//heterocyclic compound binding;GO:0000166//nucleotide binding;GO:1901265//nucleoside phosphate binding;GO:0097159//organic cyclic compound binding;GO:0003824//catalytic activity	GO:0008152//metabolic process;GO:0008150//biological_process
Bra002348	0.816667	0.74	-0.142222	no	0.96	0.73	-0.395138	no	2.23667	11.1133	2.31287	yes	-	-	-	-	-	-	-	-	-
Bra002349	28.0933	64.78	1.20532	yes	9.78333	5.22	-0.906276	no	1.18667	1.17333	-0.0163018	no	-	AT5G20980 (E=0.0) ATMS3 | ATMS3 (methionine synthase 3); 5-methyltetrahydropteroyltriglutamate-homocysteine S-methyltransferase/ methionine synthase	Metabolism	Amino acid metabolism;Global and Overview;Metabolism of other amino acids	ko01230//Biosynthesis of amino acids;ko00270//Cysteine and methionine metabolism;ko00450//Selenocompound metabolism	K00549	-	GO:0097159//organic cyclic compound binding;GO:0005488//binding;GO:0016740//transferase activity;GO:0003676//nucleic acid binding;GO:0003824//catalytic activity;GO:0005515//protein binding;GO:0003674//molecular_function;GO:1901363//heterocyclic compound binding	GO:0009058//biosynthetic process;GO:0008152//metabolic process;GO:0009987//cellular process;GO:0008150//biological_process
Bra002355	115.28	45.7733	-1.33256	yes	46.0267	12.2367	-1.91126	yes	0.226667	0.17	-0.415037	no	-	AT5G21100 (E=1e-267) | L-ascorbate oxidase, putative	Metabolism	Carbohydrate metabolism	ko00053//Ascorbate and aldarate metabolism	K00423	GO:0005576//extracellular region;GO:0005575//cellular_component	GO:0003824//catalytic activity;GO:0003674//molecular_function;GO:0005488//binding	GO:0008150//biological_process;GO:0008152//metabolic process
Bra002357	40.1767	28.06	-0.517843	no	86.2567	16.29	-2.40465	yes	14.7133	6.60667	-1.15513	yes	-	AT5G21105 (E=2e-296) | L-ascorbate oxidase/ copper ion binding / oxidoreductase	Metabolism	Carbohydrate metabolism	ko00053//Ascorbate and aldarate metabolism	K00423	GO:0005575//cellular_component;GO:0005576//extracellular region	GO:0005488//binding;GO:0003674//molecular_function;GO:0003824//catalytic activity	GO:0008150//biological_process;GO:0008152//metabolic process
Bra002383	23.9333	33.2667	0.475056	no	60.07	20.7533	-1.5333	yes	2.2	2.70333	0.297236	no	-	AT5G22020 (E=1e-198) | strictosidine synthase family protein	-	-	-	-	GO:0005783//endoplasmic reticulum;GO:0044424//intracellular part;GO:0005623//cell;GO:0005737//cytoplasm;GO:0043231//intracellular membrane-bounded organelle;GO:0043226//organelle;GO:0005575//cellular_component;GO:0044464//cell part;GO:0005622//intracellular;GO:0012505//endomembrane system;GO:0043229//intracellular organelle;GO:0044444//cytoplasmic part;GO:0043227//membrane-bounded organelle	GO:0003674//molecular_function;GO:0003824//catalytic activity	GO:0009058//biosynthetic process;GO:0008150//biological_process;GO:0008152//metabolic process
Bra002396	20.8867	58.1367	1.47687	yes	75.9033	52.4267	-0.533862	no	7.22	6.2	-0.219731	no	-	-	-	-	-	-	-	-	-
Bra002400	33.5267	73.15	1.12555	yes	44.8733	35.65	-0.331956	no	7.79333	11.4767	0.558391	no	-	AT5G22250 (E=6e-131) | CCR4-NOT transcription complex protein, putative	Genetic Information Processing	Folding, sorting and degradation	ko03018//RNA degradation	K12581	GO:0005623//cell;GO:0005634//nucleus;GO:0043226//organelle;GO:0044424//intracellular part;GO:0043231//intracellular membrane-bounded organelle;GO:0043229//intracellular organelle;GO:0005622//intracellular;GO:0044464//cell part;GO:0005575//cellular_component;GO:0043227//membrane-bounded organelle	GO:1901363//heterocyclic compound binding;GO:0003674//molecular_function;GO:0097159//organic cyclic compound binding;GO:0003676//nucleic acid binding;GO:0005488//binding	-
Bra002410	0.001	0.0366667	5.1964	no	0.001	0.04	5.32193	no	7.46333	31.6333	2.08355	yes	-	AT3G44540 (E=5e-107) FAR4 | FAR4 (FATTY ACID REDUCTASE 4); binding / catalytic/ oxidoreductase, acting on the CH-CH group of donors	Cellular Processes;Metabolism	Transport and catabolism;Lipid metabolism	ko04146//Peroxisome;ko00073//Cutin, suberine and wax biosynthesis	K13356	-	GO:0003674//molecular_function;GO:0003824//catalytic activity	-
Bra002416	0.103333	2.55333	4.627	yes	0.54	0.396667	-0.445032	no	4.09333	7.17667	0.810038	no	-	AT5G22500 (E=6e-239) FAR1 | FAR1 (FATTY ACID REDUCTASE 1); fatty acyl-CoA reductase (alcohol-forming)/ oxidoreductase, acting on the CH-CH group of donors	Cellular Processes;Metabolism	Transport and catabolism;Lipid metabolism	ko04146//Peroxisome;ko00073//Cutin, suberine and wax biosynthesis	K13356	-	GO:0003674//molecular_function;GO:0003824//catalytic activity	-
Bra002422	15.5167	41.28	1.41162	yes	10.4	11.48	0.142539	no	5.45333	3.29667	-0.72613	no	-	-	-	-	-	-	-	-	-
Bra002423	40.7233	65.78	0.691793	no	165.003	76.4567	-1.10978	yes	15.0033	6.41333	-1.22614	yes	-	AT5G22630 (E=8e-221) ADT5 | ADT5 (arogenate dehydratase 5); arogenate dehydratase/ prephenate dehydratase	Metabolism	Amino acid metabolism;Global and Overview	ko01230//Biosynthesis of amino acids;ko00400//Phenylalanine, tyrosine and tryptophan biosynthesis	K05359	-	GO:0003674//molecular_function;GO:0003824//catalytic activity;GO:0005488//binding	GO:0009987//cellular process;GO:0009058//biosynthetic process;GO:0008152//metabolic process;GO:0008150//biological_process
Bra002440	0.001	0.103333	6.69116	no	0.0666667	0.001	-6.05889	no	3.80333	0.753333	-2.3359	yes	-	-	-	-	-	-	-	-	-
Bra002447	52.0733	9.38	-2.47288	yes	0.42	0.303333	-0.469485	no	0.001	0.0766667	6.26053	no	-	AT5G22990 (E=7e-097) | zinc finger (C2H2 type) family protein	-	-	-	-	-	GO:0001071//nucleic acid binding transcription factor activity;GO:0003700//transcription factor activity, sequence-specific DNA binding;GO:0003674//molecular_function;GO:0005488//binding	GO:0006807//nitrogen compound metabolic process;GO:0006725//cellular aromatic compound metabolic process;GO:0006139//nucleobase-containing compound metabolic process;GO:0046483//heterocycle metabolic process;GO:0008150//biological_process;GO:0009058//biosynthetic process;GO:0044238//primary metabolic process;GO:0009987//cellular process;GO:1901360//organic cyclic compound metabolic process;GO:004…
Bra002478	3.31667	3.37	0.0230146	no	3.02	3.28333	0.120613	no	11.7033	4.03667	-1.53568	yes	-	AT5G60460 (E=8e-026) | sec61beta family protein	Genetic Information Processing;Cellular Processes	Transport and catabolism;Folding, sorting and degradation	ko04141//Protein processing in endoplasmic reticulum;ko04145//Phagosome;ko03060//Protein export	K09481	GO:0005623//cell;GO:0005737//cytoplasm;GO:0016020//membrane;GO:0043229//intracellular organelle;GO:0012505//endomembrane system;GO:0043227//membrane-bounded organelle;GO:0005575//cellular_component;GO:0044444//cytoplasmic part;GO:0044464//cell part;GO:0043226//organelle;GO:0044424//intracellular part;GO:0005783//endoplasmic reticulum;GO:0043231//intracellular membrane-bounded organelle;GO:0005622…	-	GO:0006810//transport;GO:0051234//establishment of localization;GO:0008150//biological_process;GO:0051179//localization
Bra002480	22.57	7.89	-1.51631	yes	0.493333	0.1	-2.30256	no	0.001	0.001	0	notest	-	AT5G60440 (E=1e-049) AGL62 | AGL62 (Agamous-like 62); DNA binding / transcription factor	-	-	-	-	GO:0005622//intracellular;GO:0005623//cell;GO:0043231//intracellular membrane-bounded organelle;GO:0043227//membrane-bounded organelle;GO:0044424//intracellular part;GO:0044464//cell part;GO:0043226//organelle;GO:0005634//nucleus;GO:0005575//cellular_component;GO:0043229//intracellular organelle	GO:0005488//binding;GO:1901363//heterocyclic compound binding;GO:0003677//DNA binding;GO:0005515//protein binding;GO:0003674//molecular_function;GO:0097159//organic cyclic compound binding;GO:0003676//nucleic acid binding	GO:1901360//organic cyclic compound metabolic process;GO:0008152//metabolic process;GO:0071704//organic substance metabolic process;GO:0009987//cellular process;GO:0006139//nucleobase-containing compound metabolic process;GO:0008150//biological_process;GO:0006807//nitrogen compound metabolic process;GO:0009058//biosynthetic process;GO:0044238//primary metabolic process;GO:0034641//cellular nitrog…
Bra002512	6.07	10.95	0.851162	no	4.02	11.7133	1.54288	no	2.29333	9.89333	2.10901	yes	APRR3	AT5G60100 (E=2e-101) APRR3, PRR3 | APRR3 (ARABIDOPSIS PSEUDO-RESPONSE REGULATOR 3); transcription regulator/ two-component response regulator	Organismal Systems	Environmental adaptation	ko04712//Circadian rhythm - plant	K12131	-	GO:0005515//protein binding;GO:0005488//binding;GO:0004871//signal transducer activity;GO:0003674//molecular_function	GO:0009058//biosynthetic process;GO:0007154//cell communication;GO:0006139//nucleobase-containing compound metabolic process;GO:0071704//organic substance metabolic process;GO:0034641//cellular nitrogen compound metabolic process;GO:0050896//response to stimulus;GO:0051716//cellular response to stimulus;GO:0023052//signaling;GO:1901360//organic cyclic compound metabolic process;GO:0046483//hetero…
Bra002513	0.001	0.17	7.40939	no	0.001	0.84	9.71425	yes	0.0366667	0.001	-5.1964	no	-	AT5G60080 (E=2e-078) | protein kinase family protein	-	-	-	-	-	GO:0003824//catalytic activity;GO:0016772//transferase activity, transferring phosphorus-containing groups;GO:1901363//heterocyclic compound binding;GO:1901265//nucleoside phosphate binding;GO:0000166//nucleotide binding;GO:0003674//molecular_function;GO:0016301//kinase activity;GO:0005488//binding;GO:0016740//transferase activity;GO:0097159//organic cyclic compound binding;GO:0036094//small mole…	GO:0008152//metabolic process;GO:0044267//cellular protein metabolic process;GO:0044237//cellular metabolic process;GO:0071704//organic substance metabolic process;GO:0006464//cellular protein modification process;GO:0019538//protein metabolic process;GO:0044260//cellular macromolecule metabolic process;GO:0036211//protein modification process;GO:0008150//biological_process;GO:0009987//cellular p…
Bra002518	3.81	11.99	1.65397	no	1.43	7.30667	2.3532	yes	8.31333	26.3133	1.6623	yes	-	-	-	-	-	-	-	-	-
Bra002525	1.91667	0.001	-10.9044	yes	0.001	0.001	0	notest	0.001	0.001	0	notest	-	-	-	-	-	-	-	-	-
Bra002570	61.76	57.1233	-0.112593	no	29.57	34.5367	0.223995	no	0.393333	1.55333	1.98154	yes	-	AT5G59390 (E=1e-200) | XH/XS domain-containing protein	-	-	-	-	-	-	GO:0009987//cellular process;GO:0008152//metabolic process;GO:0008150//biological_process
Bra002578	11.9533	2.12	-2.49528	yes	4.33	1.34	-1.69213	no	0.0933333	0.001	-6.54432	no	-	AT4G17200 (E=8e-097) | F-box family protein	-	-	-	-	-	GO:0005515//protein binding;GO:0005488//binding;GO:0003674//molecular_function	-
Bra002609	0.001	0.12	6.90689	no	0.06	0.0933333	0.63743	no	1.96	0.206667	-3.24548	yes	LAC16	AT5G58910 (E=7e-280) LAC16 | LAC16 (laccase 16); laccase	-	-	-	-	GO:0005576//extracellular region;GO:0005575//cellular_component	GO:0003824//catalytic activity;GO:0003674//molecular_function;GO:0005488//binding	GO:0009987//cellular process;GO:0019748//secondary metabolic process;GO:0008150//biological_process;GO:0044710//single-organism metabolic process;GO:0009056//catabolic process;GO:0008152//metabolic process;GO:0044699//single-organism process
Bra002617	1.12667	1.95333	0.793877	no	0.253333	4.14333	4.03168	yes	1.54667	2.24333	0.536482	no	-	-	-	-	-	-	-	-	-
Bra002622	3.26667	10.0367	1.61939	yes	4.54667	12.7133	1.48346	no	7.97667	18.43	1.2082	yes	-	AT5G58730 (E=1e-155) | pfkB-type carbohydrate kinase family protein	Metabolism	Carbohydrate metabolism	ko00562//Inositol phosphate metabolism	K19517	-	GO:1901363//heterocyclic compound binding;GO:0016740//transferase activity;GO:0003674//molecular_function;GO:0036094//small molecule binding;GO:1901265//nucleoside phosphate binding;GO:0016301//kinase activity;GO:0016772//transferase activity, transferring phosphorus-containing groups;GO:0097159//organic cyclic compound binding;GO:0000166//nucleotide binding;GO:0003824//catalytic activity;GO:0005…	GO:0009987//cellular process;GO:0009058//biosynthetic process;GO:0008150//biological_process;GO:0008152//metabolic process
Bra002631	0.11	0.296667	1.43134	no	0.0966667	2.77333	4.84246	yes	0.0366667	0.15	2.03242	no	-	AT5G58630 (E=9e-098) | unknown protein	-	-	-	-	-	GO:0003674//molecular_function;GO:0005488//binding;GO:0005515//protein binding	-
Bra002635	0.001	0.353333	8.46489	yes	0.05	0.103333	1.04731	no	0.126667	0.0266667	-2.24793	no	-	AT1G07150 (E=5e-097) MAPKKK13 | MAPKKK13; ATP binding / kinase/ protein kinase/ protein serine/threonine kinase	-	-	-	-	-	GO:0016740//transferase activity;GO:0003824//catalytic activity;GO:0000166//nucleotide binding;GO:0016301//kinase activity;GO:0003674//molecular_function;GO:0036094//small molecule binding;GO:0016772//transferase activity, transferring phosphorus-containing groups;GO:1901265//nucleoside phosphate binding;GO:0005488//binding;GO:0097159//organic cyclic compound binding;GO:1901363//heterocyclic comp…	GO:0071704//organic substance metabolic process;GO:0044260//cellular macromolecule metabolic process;GO:0008152//metabolic process;GO:0043170//macromolecule metabolic process;GO:0008150//biological_process;GO:0036211//protein modification process;GO:0044238//primary metabolic process;GO:0043412//macromolecule modification;GO:0019538//protein metabolic process;GO:0044267//cellular protein metaboli…
Bra002639	29.11	32.9667	0.179493	no	30.94	44.3767	0.520328	no	3.07333	7.92	1.3657	yes	-	AT5G58540 (E=7e-174) | protein kinase family protein	-	-	-	-	-	GO:0016772//transferase activity, transferring phosphorus-containing groups;GO:1901363//heterocyclic compound binding;GO:1901265//nucleoside phosphate binding;GO:0097159//organic cyclic compound binding;GO:0000166//nucleotide binding;GO:0036094//small molecule binding;GO:0003674//molecular_function;GO:0003824//catalytic activity;GO:0016740//transferase activity;GO:0005488//binding;GO:0016301//kin…	GO:0006464//cellular protein modification process;GO:0044260//cellular macromolecule metabolic process;GO:0008152//metabolic process;GO:0008150//biological_process;GO:0009058//biosynthetic process;GO:0044238//primary metabolic process;GO:0071704//organic substance metabolic process;GO:0005975//carbohydrate metabolic process;GO:0043170//macromolecule metabolic process;GO:0043412//macromolecule mod…
Bra002642	13.0933	11.8133	-0.148416	no	33.2333	6.61333	-2.32918	yes	0.21	0.15	-0.485427	no	-	-	-	-	-	-	-	-	-
Bra002648	0.0166667	0.0133333	-0.321928	no	0.0333333	0.0533333	0.678072	no	0.0333333	0.393333	3.56071	yes	-	AT5G37060 (E=6e-269) ATCHX24, CHX24 | ATCHX24; monovalent cation:proton antiporter/ sodium:hydrogen antiporter	-	-	-	-	GO:0016020//membrane;GO:0005575//cellular_component	GO:0003674//molecular_function;GO:0005215//transporter activity	GO:0008150//biological_process;GO:0006810//transport;GO:0009987//cellular process;GO:0051179//localization;GO:0051234//establishment of localization
Bra002658	2.28333	5.19	1.18459	yes	6.26667	4.88667	-0.358848	no	5.64667	2.41333	-1.22637	yes	-	AT5G58350 (E=2e-243) WNK4, ZIK2 | WNK4 (WITH NO K (=LYSINE) 4); kinase/ protein kinase	-	-	-	-	-	GO:0036094//small molecule binding;GO:0003674//molecular_function;GO:0005488//binding;GO:1901265//nucleoside phosphate binding;GO:0016301//kinase activity;GO:0003824//catalytic activity;GO:0097159//organic cyclic compound binding;GO:0016772//transferase activity, transferring phosphorus-containing groups;GO:0016740//transferase activity;GO:1901363//heterocyclic compound binding;GO:0000166//nucleo…	GO:0044237//cellular metabolic process;GO:0043170//macromolecule metabolic process;GO:0036211//protein modification process;GO:0019538//protein metabolic process;GO:0043412//macromolecule modification;GO:0008152//metabolic process;GO:0008150//biological_process;GO:0044267//cellular protein metabolic process;GO:0006464//cellular protein modification process;GO:0009987//cellular process;GO:0044238/…
Bra002671	25.2767	14.8033	-0.771884	no	47.5333	19.8333	-1.26101	yes	3.54667	3.47667	-0.028759	no	-	AT5G58110 (E=5e-085) | ATPase activator/ chaperone binding	-	-	-	-	-	GO:0030234//enzyme regulator activity;GO:0005488//binding;GO:0003674//molecular_function;GO:0005515//protein binding;GO:0098772//molecular function regulator	GO:0008150//biological_process
Bra002676	5.33667	2.42667	-1.13696	yes	1.99667	1.42667	-0.484945	no	1.17333	1.18667	0.0163018	no	-	AT5G58170 (E=0.0) SVL5 | SVL5 (SHV3-LIKE 5); glycerophosphodiester phosphodiesterase/ phosphoric diester hydrolase	-	-	-	-	-	GO:0003824//catalytic activity;GO:0003674//molecular_function;GO:0016787//hydrolase activity	GO:0008150//biological_process;GO:0071704//organic substance metabolic process;GO:0005975//carbohydrate metabolic process;GO:0009987//cellular process;GO:0044238//primary metabolic process;GO:0044699//single-organism process;GO:0008152//metabolic process;GO:0006629//lipid metabolic process;GO:0044710//single-organism metabolic process
Bra002697	2.02333	0.146667	-3.78612	yes	0.223333	0.0733333	-1.60666	no	0.001	0.0866667	6.43741	no	-	AT5G57780 (E=1e-067) | EXPRESSED IN: 18 plant structures; EXPRESSED DURING: 12 growth stages; BEST Arabidopsis thaliana protein match is: transcription factor (TAIR:AT4G30410.2); Has 70 Blast hits to 70 proteins in 6 species: Archae - 0; Bacteria - 0; Metazoa - 0; Fungi - 0; Plants - 70; Viruses - 0; Other Eukaryotes - 0 (source: NCBI BLink).	-	-	-	-	-	GO:0005488//binding;GO:0005515//protein binding;GO:0003674//molecular_function	-
Bra002705	2.01	0.943333	-1.09136	no	1.48667	2.57	0.789687	no	3.14	0.733333	-2.09822	yes	-	-	-	-	-	-	-	-	-
Bra002707	2.01	0.943333	-1.09136	no	1.48667	2.57	0.789687	no	3.14	0.733333	-2.09822	yes	-	-	-	-	-	-	-	-	-
Bra002711	10.9	4.49667	-1.2774	yes	14.38	6.09333	-1.23876	no	0.46	1.58667	1.78629	no	-	-	-	-	-	-	-	-	-
Bra002712	17.2333	3.04333	-2.50148	yes	6.46	3.52333	-0.874593	no	1.85667	1.93333	0.0583756	no	-	AT5G57630 (E=2e-191) CIPK21, SnRK3.4 | CIPK21 (CBL-interacting protein kinase 21); ATP binding / kinase/ protein kinase/ protein serine/threonine kinase	-	-	-	-	-	GO:0016301//kinase activity;GO:0000166//nucleotide binding;GO:0036094//small molecule binding;GO:0003824//catalytic activity;GO:0003674//molecular_function;GO:0016740//transferase activity;GO:1901363//heterocyclic compound binding;GO:0097159//organic cyclic compound binding;GO:1901265//nucleoside phosphate binding;GO:0005488//binding;GO:0016772//transferase activity, transferring phosphorus-conta…	GO:0044763//single-organism cellular process;GO:0044237//cellular metabolic process;GO:0044260//cellular macromolecule metabolic process;GO:0009987//cellular process;GO:0008150//biological_process;GO:0043412//macromolecule modification;GO:0044700//single organism signaling;GO:0044238//primary metabolic process;GO:0044699//single-organism process;GO:0071704//organic substance metabolic process;GO:…
Bra002722	0.001	0.0366667	5.1964	no	0.04	0.183333	2.1964	no	86.74	199.377	1.20073	yes	-	AT5G57550 (E=2e-146) XTR3 | XTR3 (XYLOGLUCAN ENDOTRANSGLYCOSYLASE 3); hydrolase, acting on glycosyl bonds / xyloglucan:xyloglucosyl transferase	-	-	-	-	GO:0005618//cell wall;GO:0030312//external encapsulating structure;GO:0071944//cell periphery;GO:0005575//cellular_component;GO:0044464//cell part;GO:0005623//cell;GO:0005576//extracellular region	GO:0003824//catalytic activity;GO:0016740//transferase activity;GO:0003674//molecular_function;GO:0016787//hydrolase activity	GO:0008150//biological_process;GO:0009987//cellular process;GO:0016043//cellular component organization;GO:0044238//primary metabolic process;GO:0071704//organic substance metabolic process;GO:0005975//carbohydrate metabolic process;GO:0008152//metabolic process;GO:0071840//cellular component organization or biogenesis
Bra002732	8.13333	15.2467	0.906575	no	12.0167	25.76	1.1001	no	5.75667	14.9633	1.37813	yes	-	-	-	-	-	-	-	-	-
Bra002758	0.15	0.0766667	-0.968291	no	1.03	1.07667	0.0639273	no	3.70333	0.976667	-1.92289	yes	-	-	-	-	-	-	-	-	-
Bra002764	3.95667	10.9267	1.4655	yes	9.91333	11.0967	0.162684	no	1.92	2.01667	0.0708663	no	-	-	-	-	-	-	-	-	-
Bra002788	0.0366667	0.0366667	0	no	0.0666667	0.486667	2.8679	no	2.19333	0.626667	-1.80735	yes	-	AT5G56860 (E=3e-134) GNC | GNC (GATA, nitrate-inducible, carbon metabolism-involved); transcription factor	-	-	-	-	-	GO:0097159//organic cyclic compound binding;GO:0003700//transcription factor activity, sequence-specific DNA binding;GO:0005488//binding;GO:0003674//molecular_function;GO:0003677//DNA binding;GO:0003676//nucleic acid binding;GO:0001071//nucleic acid binding transcription factor activity;GO:1901363//heterocyclic compound binding	GO:0009058//biosynthetic process;GO:1901360//organic cyclic compound metabolic process;GO:0009987//cellular process;GO:0006725//cellular aromatic compound metabolic process;GO:0034641//cellular nitrogen compound metabolic process;GO:0071704//organic substance metabolic process;GO:0006807//nitrogen compound metabolic process;GO:0046483//heterocycle metabolic process;GO:0008150//biological_process;…
Bra002812	90.5133	63.7467	-0.50578	no	42.11	42.63	0.0177062	no	4.53333	1.85667	-1.28786	yes	-	AT5G56510 (E=1e-186) APUM12 | APUM12 (ARABIDOPSIS PUMILIO 12); RNA binding / binding	-	-	-	-	-	GO:0003676//nucleic acid binding;GO:0003723//RNA binding;GO:1901363//heterocyclic compound binding;GO:0003674//molecular_function;GO:0097159//organic cyclic compound binding;GO:0005488//binding	-
Bra002822	48.89	46.66	-0.0673531	no	62.86	25.52	-1.30051	yes	11.92	6.27	-0.926847	no	-	AT5G56350 (E=3e-275) | pyruvate kinase, putative	Metabolism	Nucleotide metabolism;Global and Overview;Carbohydrate metabolism	ko01200//Carbon metabolism;ko01230//Biosynthesis of amino acids;ko00230//Purine metabolism;ko00010//Glycolysis / Gluconeogenesis;ko00620//Pyruvate metabolism	K00873	-	GO:0016772//transferase activity, transferring phosphorus-containing groups;GO:0016301//kinase activity;GO:0005488//binding;GO:0016740//transferase activity;GO:0003824//catalytic activity;GO:0003674//molecular_function	GO:0006091//generation of precursor metabolites and energy;GO:0044238//primary metabolic process;GO:0005975//carbohydrate metabolic process;GO:0034641//cellular nitrogen compound metabolic process;GO:0009056//catabolic process;GO:0044237//cellular metabolic process;GO:0006725//cellular aromatic compound metabolic process;GO:0046483//heterocycle metabolic process;GO:0006807//nitrogen compound meta…
Bra002828	15.2733	18.6667	0.289449	no	12.1467	15.8467	0.383619	no	5.49333	2.58667	-1.08659	yes	-	AT5G56270 (E=7e-260) WRKY2, ATWRKY2 | WRKY2; transcription factor	Organismal Systems	Environmental adaptation	ko04626//Plant-pathogen interaction	K18835	-	GO:0003676//nucleic acid binding;GO:0097159//organic cyclic compound binding;GO:0003677//DNA binding;GO:1901363//heterocyclic compound binding;GO:0001071//nucleic acid binding transcription factor activity;GO:0003674//molecular_function;GO:0003700//transcription factor activity, sequence-specific DNA binding;GO:0005488//binding	GO:0044238//primary metabolic process;GO:0008152//metabolic process;GO:0006139//nucleobase-containing compound metabolic process;GO:0009987//cellular process;GO:0034641//cellular nitrogen compound metabolic process;GO:0008150//biological_process;GO:0006725//cellular aromatic compound metabolic process;GO:0006807//nitrogen compound metabolic process;GO:0044237//cellular metabolic process;GO:004648…
Bra002860	64.5533	8.64	-2.90139	yes	287.92	22.8733	-3.65393	yes	2.23	0.606667	-1.87807	yes	-	-	-	-	-	-	-	-	-
Bra002873	4.97	2.93333	-0.760705	no	12.2433	3.52333	-1.79698	yes	0.94	0.656667	-0.5175	no	-	AT5G55830 (E=0.0) | lectin protein kinase, putative	-	-	-	-	GO:0005886//plasma membrane;GO:0071944//cell periphery;GO:0044464//cell part;GO:0005575//cellular_component;GO:0016020//membrane;GO:0005623//cell	GO:0016301//kinase activity;GO:0003674//molecular_function;GO:0003824//catalytic activity;GO:0016772//transferase activity, transferring phosphorus-containing groups;GO:0030246//carbohydrate binding;GO:1901363//heterocyclic compound binding;GO:0005488//binding;GO:0097159//organic cyclic compound binding;GO:1901265//nucleoside phosphate binding;GO:0016740//transferase activity;GO:0036094//small mo…	GO:0008150//biological_process;GO:0043412//macromolecule modification;GO:0008152//metabolic process;GO:0019538//protein metabolic process;GO:0016043//cellular component organization;GO:0009987//cellular process;GO:0036211//protein modification process;GO:0006464//cellular protein modification process;GO:0044699//single-organism process;GO:0044267//cellular protein metabolic process;GO:0007049//ce…
Bra002895	0.4	1.43	1.83794	yes	0.456667	1.1	1.26829	no	4.43	4	-0.147307	no	-	AT2G21950 (E=1e-042) SKIP6 | SKIP6 (SKP1 interacting partner 6); ubiquitin-protein ligase	-	-	-	-	-	GO:0003674//molecular_function;GO:0005515//protein binding;GO:0005488//binding	-
Bra002910	0.303333	0.206667	-0.553598	no	6.28333	1.78333	-1.81695	yes	0.463333	0.25	-0.890122	no	-	AT5G55350 (E=8e-141) | membrane bound O-acyl transferase (MBOAT) family protein / wax synthase-related	-	-	-	-	-	GO:0016740//transferase activity;GO:0003674//molecular_function;GO:0003824//catalytic activity	-
Bra002914	12.12	11.8967	-0.0268323	no	18.2867	14.5367	-0.331096	no	5.80667	0.846667	-2.77784	yes	-	-	-	-	-	-	-	-	-
Bra002916	6.78667	2.21333	-1.61648	yes	0.89	0.886667	-0.0054135	no	0.001	0.173333	7.43741	no	-	-	-	-	-	-	-	-	-
Bra002919	4.81333	19.7267	2.03504	yes	157.9	31.48	-2.3265	yes	39.3433	54.43	0.468283	no	IAMT1	AT5G55250 (E=2e-214) IAMT1 | IAMT1 (IAA CARBOXYLMETHYLTRANSFERASE 1); S-adenosylmethionine-dependent methyltransferase/ indole acetic acid carboxyl methyltransferase	-	-	-	-	-	GO:0003674//molecular_function;GO:0005515//protein binding;GO:0003824//catalytic activity;GO:0005488//binding;GO:0016740//transferase activity	GO:0044767//single-organism developmental process;GO:0008152//metabolic process;GO:0044238//primary metabolic process;GO:0044699//single-organism process;GO:0044707//single-multicellular organism process;GO:0009058//biosynthetic process;GO:0007275//multicellular organism development;GO:0032502//developmental process;GO:0009987//cellular process;GO:0008150//biological_process;GO:0071704//organic s…
Bra002927	14.43	12.9567	-0.155377	no	44.1167	12.14	-1.86156	yes	8.73333	6.17	-0.501262	no	-	AT5G55180 (E=5e-213) | glycosyl hydrolase family 17 protein	-	-	-	-	-	GO:0016787//hydrolase activity;GO:0003824//catalytic activity;GO:0003674//molecular_function	GO:0044238//primary metabolic process;GO:0008150//biological_process;GO:0005975//carbohydrate metabolic process;GO:0071704//organic substance metabolic process;GO:0008152//metabolic process
Bra002944	37.1233	31.69	-0.228299	no	36.19	21.2267	-0.769713	no	15.0967	5.39	-1.48587	yes	-	AT5G54940 (E=9e-055) | eukaryotic translation initiation factor SUI1, putative	Genetic Information Processing	Translation	ko03013//RNA transport	K03113	-	GO:0005488//binding;GO:0097159//organic cyclic compound binding;GO:1901363//heterocyclic compound binding;GO:0003676//nucleic acid binding;GO:0003723//RNA binding;GO:0003674//molecular_function;GO:0008135//translation factor activity, RNA binding	GO:0006412//translation;GO:0044238//primary metabolic process;GO:0009987//cellular process;GO:0044271//cellular nitrogen compound biosynthetic process;GO:0034641//cellular nitrogen compound metabolic process;GO:0010467//gene expression;GO:0009059//macromolecule biosynthetic process;GO:0044260//cellular macromolecule metabolic process;GO:0044249//cellular biosynthetic process;GO:0043604//amide bio…
Bra002948	0.001	0.02	4.32193	no	0.0466667	0.153333	1.71621	no	6.56667	1.29667	-2.34035	yes	-	-	-	-	-	-	-	-	-
Bra002975	0.706667	3.29	2.21899	yes	4.92333	8.67667	0.817505	no	3.70667	4.65667	0.329175	no	-	-	-	-	-	-	-	-	-
Bra002978	0.503333	0.636667	0.339024	no	0.973333	1.22	0.325875	no	10.3933	3.7	-1.49006	yes	BGLU41	AT5G54570 (E=1e-263) BGLU41 | BGLU41 (BETA GLUCOSIDASE 41); catalytic/ cation binding / hydrolase, hydrolyzing O-glycosyl compounds	Metabolism	Carbohydrate metabolism;Metabolism of other amino acids;Biosynthesis of other secondary metabolites	ko00500//Starch and sucrose metabolism;ko00940//Phenylpropanoid biosynthesis;ko00460//Cyanoamino acid metabolism	K01188	GO:0071944//cell periphery;GO:0044464//cell part;GO:0005575//cellular_component;GO:0030312//external encapsulating structure;GO:0005623//cell;GO:0005618//cell wall	GO:0016787//hydrolase activity;GO:0003674//molecular_function;GO:0003824//catalytic activity	GO:0008150//biological_process;GO:0044238//primary metabolic process;GO:0071704//organic substance metabolic process;GO:0005975//carbohydrate metabolic process;GO:0008152//metabolic process
Bra002987	0.213333	0.0666667	-1.67807	no	0.32	0.0333333	-3.26303	no	0.46	0.001	-8.84549	yes	-	-	-	-	-	-	-	-	-
Bra002994	3.49667	0.636667	-2.45737	yes	10.7367	4.79	-1.16445	no	0.996667	0.566667	-0.814611	no	-	-	-	-	-	-	-	-	-
Bra003001	2.01	1.38333	-0.539047	no	1.57	0.356667	-2.13812	yes	1.02333	1.27	0.311552	no	-	AT5G54250 (E=0.0) ATCNGC4, CNGC4, HLM1, DND2 | ATCNGC4 (CYCLIC NUCLEOTIDE-GATED CATION CHANNEL 4); calmodulin binding / cation channel/ cation transmembrane transporter/ cyclic nucleotide binding	-	-	-	-	GO:0016020//membrane;GO:0005575//cellular_component	GO:0005215//transporter activity;GO:0003674//molecular_function	GO:0051179//localization;GO:0008150//biological_process;GO:0009987//cellular process;GO:0006810//transport;GO:0051234//establishment of localization
Bra003009	20.5267	38.74	0.916325	no	3.50667	2.54333	-0.46338	no	2.66667	6.55	1.29646	yes	-	AT5G54160 (E=1e-170) ATOMT1, OMT1 | ATOMT1 (O-METHYLTRANSFERASE 1); caffeate O-methyltransferase/ myricetin 3'-O-methyltransferase/ quercetin 3-O-methyltransferase	Metabolism	Biosynthesis of other secondary metabolites	ko00940//Phenylpropanoid biosynthesis	K13066	-	GO:0005515//protein binding;GO:0005488//binding;GO:0016740//transferase activity;GO:0003824//catalytic activity;GO:0003674//molecular_function	GO:0008150//biological_process;GO:0008152//metabolic process
Bra003021	0.113333	0.001	-6.82443	no	2.4	0.001	-11.2288	yes	0.001	0.001	0	notest	-	AT5G54060 (E=6e-081) UF3GT | UF3GT (udp-glucose:flavonoid 3-O-glucosyltransferase); transferase, transferring glycosyl groups	Metabolism	Biosynthesis of other secondary metabolites	ko00942//Anthocyanin biosynthesis	K17193	-	GO:0003674//molecular_function;GO:0003824//catalytic activity;GO:0016740//transferase activity	GO:0008152//metabolic process;GO:0008150//biological_process
Bra003025	0.71	0.001	-9.47168	yes	0.213333	0.0866667	-1.29956	no	0.42	0.04	-3.39232	no	-	-	-	-	-	-	-	-	-
Bra003077	0.0733333	0.356667	2.28204	no	0.376667	0.32	-0.235216	no	1.06333	0.0566667	-4.22995	yes	-	-	-	-	-	-	-	-	-
Bra003126	47.4133	24.8867	-0.92992	no	258.97	32.85	-2.97882	yes	11.0433	3.20333	-1.78553	yes	-	AT3G53260 (E=0.0) PAL2, ATPAL2 | PAL2; phenylalanine ammonia-lyase	Metabolism	Amino acid metabolism;Biosynthesis of other secondary metabolites	ko00940//Phenylpropanoid biosynthesis;ko00360//Phenylalanine metabolism	K10775	GO:0005623//cell;GO:0005622//intracellular;GO:0005575//cellular_component;GO:0044464//cell part;GO:0044424//intracellular part;GO:0005737//cytoplasm	GO:0003824//catalytic activity;GO:0003674//molecular_function	GO:0019748//secondary metabolic process;GO:0009056//catabolic process;GO:0009987//cellular process;GO:0008150//biological_process;GO:0044710//single-organism metabolic process;GO:0008152//metabolic process;GO:0009058//biosynthetic process;GO:0044699//single-organism process
Bra003129	0.001	0.0266667	4.73697	no	0.163333	0.4	1.29218	no	4.07	1.53	-1.4115	yes	CYP71B5	AT3G53280 (E=1e-226) CYP71B5 | CYP71B5 (CYTOCHROME P450 71B5); electron carrier/ heme binding / iron ion binding / monooxygenase/ oxygen binding	Metabolism	Metabolism of terpenoids and polyketides;Biosynthesis of other secondary metabolites	ko00945//Stilbenoid, diarylheptanoid and gingerol biosynthesis;ko00903//Limonene and pinene degradation	K00517	-	GO:0003674//molecular_function;GO:0005488//binding;GO:0003824//catalytic activity	GO:0008150//biological_process;GO:0008152//metabolic process
Bra003177	53.48	3.53	-3.92126	yes	26.4567	3.94	-2.74736	yes	32.0567	3.50333	-3.19382	yes	-	AT3G54300 (E=2e-125) ATVAMP727, VAMP727 | ATVAMP727 (VESICLE-ASSOCIATED MEMBRANE PROTEIN 727)	-	-	-	-	GO:0016020//membrane;GO:0005575//cellular_component	-	GO:0006810//transport;GO:0051179//localization;GO:0051234//establishment of localization;GO:0008150//biological_process
Bra003186	54.2967	47	-0.208203	no	63.44	49.0533	-0.371042	no	42.51	14.8833	-1.5141	yes	-	AT3G54470 (E=9e-235) | uridine 5'-monophosphate synthase / UMP synthase (PYRE-F) (UMPS)	Metabolism	Nucleotide metabolism	ko00240//Pyrimidine metabolism	K13421	-	GO:0003824//catalytic activity;GO:0016740//transferase activity;GO:0003674//molecular_function	GO:0044238//primary metabolic process;GO:0006139//nucleobase-containing compound metabolic process;GO:0006725//cellular aromatic compound metabolic process;GO:0006807//nitrogen compound metabolic process;GO:0009987//cellular process;GO:0044237//cellular metabolic process;GO:0046483//heterocycle metabolic process;GO:0008152//metabolic process;GO:0008150//biological_process;GO:0009058//biosynthetic…
Bra003196	32.16	45.5767	0.503028	no	21.51	7.73333	-1.47585	yes	9.45333	28.5433	1.59426	yes	-	AT3G54820 (E=7e-157) PIP2D, PIP2;5 | PIP2;5 (PLASMA MEMBRANE INTRINSIC PROTEIN 2;5); water channel	-	-	-	-	GO:0005575//cellular_component;GO:0016020//membrane	GO:0005215//transporter activity;GO:0003674//molecular_function	GO:0051234//establishment of localization;GO:0051179//localization;GO:0008150//biological_process;GO:0006810//transport
Bra003209	3.95667	10.2367	1.37139	no	18.4	3.66333	-2.32848	yes	8.88	9.34667	0.0738923	no	-	AT3G55120 (E=2e-090) TT5, A11, CFI | TT5 (TRANSPARENT TESTA 5); chalcone isomerase	Metabolism	Biosynthesis of other secondary metabolites	ko00941//Flavonoid biosynthesis	K01859	-	GO:0003824//catalytic activity;GO:0003674//molecular_function	GO:0008150//biological_process;GO:0008152//metabolic process;GO:0009058//biosynthetic process
Bra003210	3.06	13.5467	2.14633	yes	9.73333	18.7933	0.949215	no	6.97	6.66667	-0.0641931	no	-	AT3G55380 (E=8e-085) UBC14 | UBC14 (ubiquitin-conjugating enzyme 14); ubiquitin-protein ligase	Genetic Information Processing	Folding, sorting and degradation	ko04141//Protein processing in endoplasmic reticulum;ko04120//Ubiquitin mediated proteolysis	K10575	-	GO:0003824//catalytic activity;GO:0003674//molecular_function	-
Bra003212	2.26333	0.58	-1.96432	yes	6.05	1.85	-1.70941	yes	29.55	31.46	0.0903605	no	-	AT3G55430 (E=7e-224) | glycosyl hydrolase family 17 protein / beta-1,3-glucanase, putative	-	-	-	-	-	GO:0003674//molecular_function;GO:0016787//hydrolase activity;GO:0003824//catalytic activity	GO:0071704//organic substance metabolic process;GO:0008152//metabolic process;GO:0044238//primary metabolic process;GO:0005975//carbohydrate metabolic process;GO:0008150//biological_process
Bra003217	0.08	0.123333	0.624491	no	0.32	0.226667	-0.4975	no	5.42333	1.91	-1.50561	yes	-	-	-	-	-	-	-	-	-
Bra003219	0.66	7.48	3.5025	yes	1.1	4.49667	2.03135	no	1.05333	6.94333	2.72067	yes	-	-	-	-	-	-	-	-	-
Bra003221	0.163333	1.79333	3.45675	yes	0.756667	2.79667	1.88598	no	1.92333	0.473333	-2.02268	yes	-	AT3G55800 (E=3e-144) SBPASE | SBPASE (sedoheptulose-bisphosphatase); phosphoric ester hydrolase/ sedoheptulose-bisphosphatase	Metabolism	Global and Overview;Energy metabolism	ko01200//Carbon metabolism;ko00710//Carbon fixation in photosynthetic organisms	K01100	-	GO:0003674//molecular_function;GO:0003824//catalytic activity;GO:0016787//hydrolase activity	GO:0071704//organic substance metabolic process;GO:0044238//primary metabolic process;GO:0008150//biological_process;GO:0008152//metabolic process;GO:0005975//carbohydrate metabolic process
Bra003245	3.31	2.94667	-0.167747	no	1.43667	4.40667	1.61696	yes	0.763333	1.47333	0.948699	no	-	AT3G56620 (E=1e-149) | integral membrane family protein / nodulin MtN21-related	-	-	-	-	GO:0005575//cellular_component;GO:0016020//membrane	GO:0005215//transporter activity;GO:0003674//molecular_function	GO:0006810//transport;GO:0051234//establishment of localization;GO:0008150//biological_process;GO:0051179//localization;GO:0009987//cellular process
Bra003248	0.283333	0.193333	-0.55141	no	4.38667	0.226667	-4.27448	yes	0.963333	0.993333	0.0442428	no	-	AT3G56700 (E=4e-126) FAR6 | FAR6 (FATTY ACID REDUCTASE 6); fatty acyl-CoA reductase (alcohol-forming)/ oxidoreductase, acting on the CH-CH group of donors, NAD or NADP as acceptor	Cellular Processes;Metabolism	Transport and catabolism;Lipid metabolism	ko04146//Peroxisome;ko00073//Cutin, suberine and wax biosynthesis	K13356	-	GO:0003674//molecular_function;GO:0003824//catalytic activity	-
Bra003255	0.5	0.0866667	-2.52838	no	29.8833	0.993333	-4.91092	yes	1.15333	0.143333	-3.00836	yes	-	AT3G56700 (E=2e-127) FAR6 | FAR6 (FATTY ACID REDUCTASE 6); fatty acyl-CoA reductase (alcohol-forming)/ oxidoreductase, acting on the CH-CH group of donors, NAD or NADP as acceptor	Cellular Processes;Metabolism	Transport and catabolism;Lipid metabolism	ko04146//Peroxisome;ko00073//Cutin, suberine and wax biosynthesis	K13356	-	GO:0003824//catalytic activity;GO:0003674//molecular_function	-
Bra003263	501.89	314.3	-0.675229	no	264.9	122.25	-1.11561	yes	198.61	238.143	0.261892	no	-	AT3G57020 (E=5e-184) | strictosidine synthase family protein	-	-	-	-	-	GO:0003824//catalytic activity;GO:0003674//molecular_function	GO:0008150//biological_process;GO:0008152//metabolic process;GO:0009058//biosynthetic process
Bra003273	0.001	0.07	6.12928	no	0.001	0.11	6.78136	no	9.96333	3.88667	-1.3581	yes	BG3	AT3G57240 (E=1e-138) BG3 | BG3 (BETA-1,3-GLUCANASE 3); cellulase/ hydrolase, hydrolyzing O-glycosyl compounds	-	-	-	-	GO:0005618//cell wall;GO:0005623//cell;GO:0005575//cellular_component;GO:0071944//cell periphery;GO:0005576//extracellular region;GO:0044464//cell part;GO:0030312//external encapsulating structure	GO:0003674//molecular_function;GO:0003824//catalytic activity;GO:0016787//hydrolase activity	GO:0016265//death;GO:0051179//localization;GO:0009607//response to biotic stimulus;GO:0044700//single organism signaling;GO:0008219//cell death;GO:0044267//cellular protein metabolic process;GO:0008150//biological_process;GO:0050794//regulation of cellular process;GO:0009058//biosynthetic process;GO:0019538//protein metabolic process;GO:0071840//cellular component organization or biogenesis;GO:00…
Bra003276	14.9267	26.5133	0.828826	no	7.07333	13.2367	0.904078	no	0.466667	1.43333	1.61891	yes	-	AT3G57330 (E=0.0) ACA11 | ACA11 (autoinhibited Ca2+-ATPase 11); calcium-transporting ATPase/ calmodulin binding	-	-	-	-	GO:0005575//cellular_component;GO:0016020//membrane	GO:0005515//protein binding;GO:0016787//hydrolase activity;GO:1901363//heterocyclic compound binding;GO:1901265//nucleoside phosphate binding;GO:0005488//binding;GO:0005215//transporter activity;GO:0000166//nucleotide binding;GO:0003824//catalytic activity;GO:0036094//small molecule binding;GO:0097159//organic cyclic compound binding;GO:0003674//molecular_function	GO:0008150//biological_process;GO:0051234//establishment of localization;GO:0006810//transport;GO:0051179//localization;GO:0009987//cellular process
Bra003279	3.59	12.16	1.76009	yes	3.20667	11.1	1.79141	no	0.706667	2.63333	1.89779	no	-	AT3G57390 (E=7e-063) AGL18 | AGL18; transcription factor	-	-	-	-	GO:0043226//organelle;GO:0043231//intracellular membrane-bounded organelle;GO:0005575//cellular_component;GO:0043229//intracellular organelle;GO:0044464//cell part;GO:0005634//nucleus;GO:0005623//cell;GO:0044424//intracellular part;GO:0043227//membrane-bounded organelle;GO:0005622//intracellular	GO:0003674//molecular_function;GO:0003700//transcription factor activity, sequence-specific DNA binding;GO:0001071//nucleic acid binding transcription factor activity	GO:0006725//cellular aromatic compound metabolic process;GO:0008152//metabolic process;GO:1901360//organic cyclic compound metabolic process;GO:0006139//nucleobase-containing compound metabolic process;GO:0034641//cellular nitrogen compound metabolic process;GO:0009058//biosynthetic process;GO:0006807//nitrogen compound metabolic process;GO:0071704//organic substance metabolic process;GO:0009987/…
Bra003280	0.133333	0.02	-2.73697	no	0.02	0.653333	5.02975	yes	1.28667	3.31	1.36319	yes	-	-	-	-	-	-	-	-	-
Bra003289	1.45	1.90667	0.395	no	1.71333	8.24667	2.26701	yes	1.14	5.57667	2.29037	yes	-	AT3G57610 (E=5e-231) ADSS | ADSS (ADENYLOSUCCINATE SYNTHASE); adenylosuccinate synthase	Metabolism	Amino acid metabolism;Nucleotide metabolism	ko00230//Purine metabolism;ko00250//Alanine, aspartate and glutamate metabolism	K01939	GO:0043229//intracellular organelle;GO:0043226//organelle;GO:0043227//membrane-bounded organelle;GO:0005737//cytoplasm;GO:0043231//intracellular membrane-bounded organelle;GO:0005623//cell;GO:0009536//plastid;GO:0044464//cell part;GO:0044424//intracellular part;GO:0044444//cytoplasmic part;GO:0005622//intracellular;GO:0005575//cellular_component	GO:0003824//catalytic activity;GO:0000166//nucleotide binding;GO:0003674//molecular_function;GO:1901363//heterocyclic compound binding;GO:0036094//small molecule binding;GO:0097159//organic cyclic compound binding;GO:1901265//nucleoside phosphate binding;GO:0005488//binding	GO:0009987//cellular process;GO:0044237//cellular metabolic process;GO:0006139//nucleobase-containing compound metabolic process;GO:0008150//biological_process;GO:0006807//nitrogen compound metabolic process;GO:0034641//cellular nitrogen compound metabolic process;GO:0044238//primary metabolic process;GO:0006725//cellular aromatic compound metabolic process;GO:0009058//biosynthetic process;GO:000…
Bra003339	26.18	14.0867	-0.894135	no	28.5667	10.4633	-1.44899	yes	11.1833	6.67333	-0.744871	no	-	AT3G58490 (E=1e-214) | phosphatidic acid phosphatase family protein / PAP2 family protein	Metabolism	Lipid metabolism	ko00600//Sphingolipid metabolism	K04716	GO:0044444//cytoplasmic part;GO:0005575//cellular_component;GO:0005623//cell;GO:0005737//cytoplasm;GO:0005783//endoplasmic reticulum;GO:0043229//intracellular organelle;GO:0043226//organelle;GO:0005622//intracellular;GO:0043227//membrane-bounded organelle;GO:0016020//membrane;GO:0044424//intracellular part;GO:0012505//endomembrane system;GO:0043231//intracellular membrane-bounded organelle;GO:004…	GO:0003824//catalytic activity;GO:0003674//molecular_function	GO:0044238//primary metabolic process;GO:0071704//organic substance metabolic process;GO:0009987//cellular process;GO:0009719//response to endogenous stimulus;GO:0008150//biological_process;GO:0008152//metabolic process;GO:0044699//single-organism process;GO:0006629//lipid metabolic process;GO:0050896//response to stimulus;GO:0044710//single-organism metabolic process
Bra003340	31.91	70.5067	1.14375	yes	34.6633	80.51	1.21576	yes	10.6167	41.02	1.95	yes	-	AT3G58500 (E=3e-186) PP2A-3, EP7 | PP2A-3 (PROTEIN PHOSPHATASE 2A-3); protein serine/threonine phosphatase	Genetic Information Processing	Translation	ko03015//mRNA surveillance pathway	K04382	-	GO:0016787//hydrolase activity;GO:0003674//molecular_function;GO:0003824//catalytic activity	GO:0036211//protein modification process;GO:0043412//macromolecule modification;GO:0044238//primary metabolic process;GO:0009987//cellular process;GO:0071704//organic substance metabolic process;GO:0008150//biological_process;GO:0019538//protein metabolic process;GO:0008152//metabolic process;GO:0043170//macromolecule metabolic process;GO:0044267//cellular protein metabolic process;GO:0006464//ce…
Bra003350	2.11667	2.10667	-0.00683203	no	1.58333	2.14667	0.439133	no	2.35	5.59333	1.25105	yes	-	AT3G58690 (E=7e-095) | protein kinase family protein	-	-	-	-	-	GO:0005488//binding;GO:0003674//molecular_function;GO:0016772//transferase activity, transferring phosphorus-containing groups;GO:1901363//heterocyclic compound binding;GO:0097159//organic cyclic compound binding;GO:0016740//transferase activity;GO:0036094//small molecule binding;GO:1901265//nucleoside phosphate binding;GO:0000166//nucleotide binding;GO:0003824//catalytic activity;GO:0016301//kin…	GO:0043170//macromolecule metabolic process;GO:0036211//protein modification process;GO:0044237//cellular metabolic process;GO:0008152//metabolic process;GO:0044238//primary metabolic process;GO:0019538//protein metabolic process;GO:0044260//cellular macromolecule metabolic process;GO:0043412//macromolecule modification;GO:0071704//organic substance metabolic process;GO:0044267//cellular protein …
Bra003358	5.93667	12.9433	1.12448	yes	9.00667	19.4333	1.10947	no	4.08667	8.42333	1.04347	yes	-	-	-	-	-	-	-	-	-
Bra003359	0.453333	1.23	1.44001	no	0.186667	1.43667	2.94419	yes	0.616667	1.40333	1.18629	no	-	AT3G58840 (E=3e-021) | LOCATED IN: mitochondrion, plastid; EXPRESSED IN: 21 plant structures; EXPRESSED DURING: 9 growth stages; BEST Arabidopsis thaliana protein match is: myosin heavy chain-related (TAIR:AT1G06530.1); Has 122842 Blast hits to 54311 proteins in 2061 species: Archae - 1832; Bacteria - 13809; Metazoa - 62057; Fungi - 8845; Plants - 4054; Viruses - 676; Other Eukaryotes - 31569 (so…	-	-	-	-	GO:0044444//cytoplasmic part;GO:0005575//cellular_component;GO:0043229//intracellular organelle;GO:0044424//intracellular part;GO:0043231//intracellular membrane-bounded organelle;GO:0043227//membrane-bounded organelle;GO:0016020//membrane;GO:0009536//plastid;GO:0044464//cell part;GO:0042579//microbody;GO:0043226//organelle;GO:0005737//cytoplasm;GO:0005739//mitochondrion;GO:0005622//intracellular…	-	GO:0016043//cellular component organization;GO:0008150//biological_process;GO:0071840//cellular component organization or biogenesis;GO:0009987//cellular process
Bra003361	94.1833	65.1667	-0.531338	no	273.01	37.1433	-2.87778	yes	1.42333	0.703333	-1.01699	no	TT12	AT3G59030 (E=7e-251) TT12, ATTT12 | TT12 (TRANSPARENT TESTA 12); antiporter/ solute:hydrogen antiporter/ transmembrane transporter/ transporter	-	-	-	-	GO:0005575//cellular_component;GO:0016020//membrane;GO:0043231//intracellular membrane-bounded organelle;GO:0043226//organelle;GO:0044424//intracellular part;GO:0043229//intracellular organelle;GO:0005737//cytoplasm;GO:0044444//cytoplasmic part;GO:0005773//vacuole;GO:0044464//cell part;GO:0005622//intracellular;GO:0005623//cell;GO:0043227//membrane-bounded organelle	GO:0003674//molecular_function;GO:0005215//transporter activity	GO:0009791//post-embryonic development;GO:0044699//single-organism process;GO:0009058//biosynthetic process;GO:0051234//establishment of localization;GO:0032502//developmental process;GO:0032501//multicellular organismal process;GO:0044707//single-multicellular organism process;GO:0008152//metabolic process;GO:0007275//multicellular organism development;GO:0006810//transport;GO:0044710//single-or…
Bra003375	9.21	8.37333	-0.137399	no	13.4467	13.3833	-0.0068111	no	8.95	1.72	-2.37948	yes	-	-	-	-	-	-	-	-	-
Bra003376	27.55	1.35667	-4.34391	yes	12.0867	1.80333	-2.74468	yes	0.816667	0.97	0.248237	no	-	AT3G59440 (E=4e-097) | calcium-binding protein, putative	Organismal Systems	Environmental adaptation	ko04626//Plant-pathogen interaction	K13448	-	GO:0005488//binding;GO:0003674//molecular_function	-
Bra003385	1.58	2.32667	0.55834	no	1.57667	2.04333	0.374047	no	3.40333	0.87	-1.96786	yes	-	-	-	-	-	-	-	-	-
Bra003387	8.21	19.5367	1.25073	yes	7.48	19.3	1.36749	yes	3.58	7.56667	1.0797	yes	-	AT2G43770 (E=7e-183) | transducin family protein / WD-40 repeat family protein	Genetic Information Processing	Transcription	ko03040//Spliceosome	K12857	-	GO:0005488//binding;GO:0003674//molecular_function;GO:0005515//protein binding	-
Bra003396	8.88667	2.01667	-2.13967	yes	1.11333	0.626667	-0.829115	no	0.05	0.001	-5.64386	no	-	AT3G59960 (E=2e-067) ASHH4, SDG24 | ASHH4 (HISTONE-LYSINE N-METHYLTRANSFERASE ASHH4); histone-lysine N-methyltransferase	Metabolism	Amino acid metabolism	ko00310//Lysine degradation	K11423	GO:0043227//membrane-bounded organelle;GO:0044424//intracellular part;GO:0043229//intracellular organelle;GO:0005623//cell;GO:0044464//cell part;GO:0043231//intracellular membrane-bounded organelle;GO:0005575//cellular_component;GO:0005622//intracellular;GO:0043226//organelle;GO:0005634//nucleus	GO:0005515//protein binding;GO:0003824//catalytic activity;GO:0003674//molecular_function;GO:0016740//transferase activity;GO:0005488//binding	GO:0009987//cellular process;GO:0008150//biological_process;GO:0019538//protein metabolic process;GO:0044267//cellular protein metabolic process;GO:0006464//cellular protein modification process;GO:0044238//primary metabolic process;GO:0044237//cellular metabolic process;GO:0044260//cellular macromolecule metabolic process;GO:0016043//cellular component organization;GO:0036211//protein modificati…
Bra003401	13.3267	4.55	-1.55038	yes	18.95	4.16	-2.18754	yes	16.95	0.11	-7.26764	yes	-	AT3G60130 (E=2e-263) BGLU16 | BGLU16 (BETA GLUCOSIDASE 16); catalytic/ cation binding / hydrolase, hydrolyzing O-glycosyl compounds	Metabolism	Carbohydrate metabolism;Metabolism of other amino acids;Biosynthesis of other secondary metabolites	ko00500//Starch and sucrose metabolism;ko00940//Phenylpropanoid biosynthesis;ko00460//Cyanoamino acid metabolism	K01188	-	GO:0003674//molecular_function;GO:0003824//catalytic activity;GO:0016787//hydrolase activity	GO:0008152//metabolic process;GO:0071704//organic substance metabolic process;GO:0005975//carbohydrate metabolic process;GO:0008150//biological_process;GO:0044238//primary metabolic process
Bra003404	0.77	0.496667	-0.632581	no	0.56	0.433333	-0.36995	no	3.91333	0.663333	-2.56059	yes	-	AT3G60220 (E=6e-096) ATL4 | ATL4; protein binding / zinc ion binding	-	-	-	-	-	GO:0005515//protein binding;GO:0005488//binding;GO:0003674//molecular_function	-
Bra003428	143.997	36.2267	-1.99091	yes	134.933	40.2033	-1.74686	yes	33.6867	7.42333	-2.18204	yes	-	AT3G60820 (E=5e-121) PBF1 | PBF1; peptidase/ threonine-type endopeptidase	Genetic Information Processing	Folding, sorting and degradation	ko03050//Proteasome	K02732	GO:0043226//organelle;GO:0005623//cell;GO:0044464//cell part;GO:0005575//cellular_component;GO:0043229//intracellular organelle;GO:0005622//intracellular;GO:0005634//nucleus;GO:0044424//intracellular part;GO:0005737//cytoplasm;GO:0043227//membrane-bounded organelle;GO:0043231//intracellular membrane-bounded organelle	GO:0016787//hydrolase activity;GO:0003674//molecular_function;GO:0003824//catalytic activity	GO:0009987//cellular process;GO:0008150//biological_process;GO:0071704//organic substance metabolic process;GO:0044238//primary metabolic process;GO:0043170//macromolecule metabolic process;GO:0008152//metabolic process;GO:0009056//catabolic process;GO:0019538//protein metabolic process
Bra003430	0.173333	0.143333	-0.274175	no	0.7	0.04	-4.12928	yes	0.853333	0.113333	-2.91254	yes	-	-	-	-	-	-	-	-	-
Bra003432	1.3	5.79333	2.15588	yes	157.593	376.81	1.25763	yes	10.23	14.66	0.519079	no	-	-	-	-	-	-	-	-	-
Bra003433	2.63667	0.266667	-3.30561	yes	2.05	1	-1.03562	no	1.50333	1.98	0.397335	no	-	AT3G60910 (E=4e-067) | catalytic/ methyltransferase	-	-	-	-	-	GO:0003824//catalytic activity;GO:0016740//transferase activity;GO:0003674//molecular_function	GO:0008152//metabolic process;GO:0008150//biological_process
Bra003444	1.48667	0.636667	-1.22347	no	0.146667	0.001	-7.1964	no	0.22	1.29333	2.55552	yes	-	-	-	-	-	-	-	-	-
Bra003461	15.6067	5.53333	-1.49594	yes	13.9833	7.24333	-0.948983	no	7.31333	3.67667	-0.992131	no	-	-	-	-	-	-	-	-	-
Bra003463	2.27	3.29	0.535395	no	10.4567	4.73	-1.14451	no	4.52333	0.983333	-2.20163	yes	-	-	-	-	-	-	-	-	-
Bra003465	6.62	5.09333	-0.378221	no	10.11	3.8	-1.41171	yes	2.37	3.81333	0.686166	no	-	-	-	-	-	-	-	-	-
Bra003468	0.0966667	0.203333	1.07276	no	0.13	0.21	0.691878	no	0.97	0.25	-1.95606	yes	-	AT3G61750 (E=6e-186) | auxin-responsive protein -related	-	-	-	-	GO:0016020//membrane;GO:0005575//cellular_component	-	GO:0008150//biological_process;GO:0008152//metabolic process
Bra003480	1.27333	13.5867	3.41551	yes	0.973333	10.09	3.37385	yes	0.22	4.16333	4.24216	yes	-	-	-	-	-	-	-	-	-
Bra003490	0.536667	0.363333	-0.562733	no	0.0666667	0.0466667	-0.514573	no	0.903333	0.173333	-2.38171	yes	PGP21	AT3G62150 (E=0.0) PGP21 | PGP21 (P-GLYCOPROTEIN 21); ATPase, coupled to transmembrane movement of substances	Environmental Information Processing	Membrane transport	ko02010//ABC transporters	K05658	GO:0005575//cellular_component;GO:0016020//membrane	GO:1901363//heterocyclic compound binding;GO:0016787//hydrolase activity;GO:0005488//binding;GO:0003824//catalytic activity;GO:0000166//nucleotide binding;GO:0003674//molecular_function;GO:0005215//transporter activity;GO:0097159//organic cyclic compound binding;GO:1901265//nucleoside phosphate binding;GO:0036094//small molecule binding	GO:0006810//transport;GO:0008150//biological_process;GO:0009987//cellular process;GO:0051234//establishment of localization;GO:0051179//localization
Bra003526	28.3967	66.42	1.2259	yes	37.3	67.05	0.846062	no	1.34667	3.76667	1.4839	no	-	AT3G45140 (E=0.0) LOX2, ATLOX2 | LOX2 (LIPOXYGENASE 2); lipoxygenase	Metabolism	Lipid metabolism	ko00592//alpha-Linolenic acid metabolism;ko00591//Linoleic acid metabolism	K00454	-	GO:0003674//molecular_function;GO:0005515//protein binding;GO:0005488//binding;GO:0003824//catalytic activity	GO:0044710//single-organism metabolic process;GO:0006629//lipid metabolic process;GO:0044699//single-organism process;GO:0044238//primary metabolic process;GO:0008150//biological_process;GO:0008152//metabolic process;GO:0009058//biosynthetic process;GO:0009987//cellular process;GO:0071704//organic substance metabolic process
Bra003528	0.001	0.001	0	notest	0.001	0.001	0	notest	0.733333	0.0733333	-3.32193	yes	-	-	-	-	-	-	-	-	-
Bra003535	42.3367	4.48667	-3.23819	yes	74.3567	4.16333	-4.15865	yes	6.28667	0.626667	-3.32653	yes	GL2	AT1G79840 (E=0.0) GL2 | GL2 (GLABRA 2); DNA binding / transcription factor	-	-	-	-	GO:0044424//intracellular part;GO:0005622//intracellular;GO:0044464//cell part;GO:0043229//intracellular organelle;GO:0005623//cell;GO:0005634//nucleus;GO:0043226//organelle;GO:0043227//membrane-bounded organelle;GO:0005575//cellular_component;GO:0043231//intracellular membrane-bounded organelle	GO:0097159//organic cyclic compound binding;GO:0008289//lipid binding;GO:0001071//nucleic acid binding transcription factor activity;GO:0005488//binding;GO:0003700//transcription factor activity, sequence-specific DNA binding;GO:0003677//DNA binding;GO:1901363//heterocyclic compound binding;GO:0003674//molecular_function;GO:0003676//nucleic acid binding	GO:0006807//nitrogen compound metabolic process;GO:0044237//cellular metabolic process;GO:0071704//organic substance metabolic process;GO:0006139//nucleobase-containing compound metabolic process;GO:0006725//cellular aromatic compound metabolic process;GO:0009058//biosynthetic process;GO:0009987//cellular process;GO:0008152//metabolic process;GO:0008150//biological_process;GO:0044238//primary met…
Bra003546	72.9867	47.8633	-0.608712	no	97.0933	45.13	-1.10529	yes	36.18	16.7667	-1.1096	yes	-	AT1G80040 (E=8e-075) | unknown protein	-	-	-	-	-	GO:0005488//binding;GO:0003674//molecular_function;GO:0005515//protein binding	-
Bra003549	1.28333	0.22	-2.54432	yes	2.06667	0.753333	-1.45595	no	5.06	3.38333	-0.580692	no	TMM	AT1G80080 (E=2e-207) TMM, AtRLP17 | TMM (TOO MANY MOUTHS); protein binding / receptor	-	-	-	-	GO:0016020//membrane;GO:0005575//cellular_component	GO:0060089//molecular transducer activity;GO:0003674//molecular_function;GO:0005488//binding;GO:0005515//protein binding;GO:0004872//receptor activity	GO:0009653//anatomical structure morphogenesis;GO:0048856//anatomical structure development;GO:0044700//single organism signaling;GO:0009908//flower development;GO:0023052//signaling;GO:0032501//multicellular organismal process;GO:0051716//cellular response to stimulus;GO:0009719//response to endogenous stimulus;GO:0000003//reproduction;GO:0044702//single organism reproductive process;GO:0061458/…
Bra003568	0.173333	0.11	-0.656046	no	1.04	0.503333	-1.047	no	0.71	0.103333	-2.78051	yes	-	AT5G51280 (E=7e-280) | DEAD-box protein abstrakt, putative	-	-	-	-	-	GO:0016787//hydrolase activity;GO:0036094//small molecule binding;GO:0003676//nucleic acid binding;GO:0097159//organic cyclic compound binding;GO:1901363//heterocyclic compound binding;GO:0000166//nucleotide binding;GO:0005488//binding;GO:1901265//nucleoside phosphate binding;GO:0003674//molecular_function;GO:0003824//catalytic activity	-
Bra003570	1.89667	0.47	-2.01273	yes	1.59	0.426667	-1.89785	no	0.001	0.001	0	notest	-	AT1G80510 (E=4e-158) | amino acid transporter family protein	-	-	-	-	GO:0016020//membrane;GO:0005575//cellular_component	-	-
Bra003571	1.10333	4.87667	2.14403	yes	1.24	2.61	1.07371	no	4.69333	7.18667	0.61471	no	-	-	-	-	-	-	-	-	-
Bra003572	47.9933	29.8533	-0.684942	no	101.617	87.2267	-0.220296	no	20.0767	8.19333	-1.293	yes	-	-	-	-	-	-	-	-	-
Bra003575	0.0733333	0.0266667	-1.45943	no	0.256667	0.0266667	-3.26679	no	0.653333	0.0666667	-3.29278	yes	-	-	-	-	-	-	-	-	-
Bra003583	73.49	32.51	-1.17666	yes	35.49	33.6833	-0.0753777	no	59	34.7033	-0.765641	no	-	-	-	-	-	-	-	-	-
Bra003592	548.713	254.887	-1.1062	yes	274.38	350.05	0.351386	no	179.643	71.2767	-1.33363	yes	-	-	-	-	-	-	-	-	-
Bra003596	14.1233	7.57667	-0.898445	no	0.92	0.58	-0.665581	no	3.48333	7.32333	1.07203	yes	-	AT1G79720 (E=1e-225) | aspartyl protease family protein	-	-	-	-	-	GO:0016787//hydrolase activity;GO:0003824//catalytic activity;GO:0003674//molecular_function	GO:0043170//macromolecule metabolic process;GO:0008152//metabolic process;GO:0019538//protein metabolic process;GO:0008150//biological_process;GO:0071704//organic substance metabolic process;GO:0044238//primary metabolic process
Bra003607	2.28	0.793333	-1.52303	no	3.23667	1.15667	-1.48454	no	2.42333	0.46	-2.39729	yes	-	-	-	-	-	-	-	-	-
Bra003609	9.77	4.5	-1.11843	yes	7.83667	3.94	-0.992045	no	10.0733	4.84333	-1.05647	yes	EMB2217	AT1G79490 (E=0.0) EMB2217 | EMB2217 (embryo defective 2217)	-	-	-	-	GO:0005575//cellular_component;GO:0043229//intracellular organelle;GO:0043227//membrane-bounded organelle;GO:0005622//intracellular;GO:0005623//cell;GO:0044424//intracellular part;GO:0043231//intracellular membrane-bounded organelle;GO:0044444//cytoplasmic part;GO:0005737//cytoplasm;GO:0005739//mitochondrion;GO:0043226//organelle;GO:0044464//cell part	GO:0005488//binding;GO:0005515//protein binding;GO:0003674//molecular_function	GO:0007275//multicellular organism development;GO:0008150//biological_process;GO:0032501//multicellular organismal process;GO:0032502//developmental process;GO:0044767//single-organism developmental process;GO:0009987//cellular process;GO:0044707//single-multicellular organism process;GO:0044699//single-organism process;GO:0000003//reproduction;GO:0030154//cell differentiation;GO:0044763//single-…
Bra003610	3.55333	4.59667	0.371415	no	0.473333	1.72333	1.86427	no	0.173333	0.846667	2.28824	yes	ALIS5	AT1G79450 (E=1e-175) ALIS5 | ALIS5 (ALA-Interacting Subunit 5)	-	-	-	-	GO:0071944//cell periphery;GO:0016020//membrane;GO:0005575//cellular_component;GO:0005623//cell;GO:0005886//plasma membrane;GO:0044464//cell part	-	GO:0006810//transport;GO:0051234//establishment of localization;GO:0051179//localization;GO:0008150//biological_process
Bra003615	1.71	4.4	1.36351	yes	4.38333	6.3	0.523323	no	16.36	8.87333	-0.882625	no	-	AT1G79270 (E=2e-210) ECT8 | ECT8 (evolutionarily conserved C-terminal region 8)	-	-	-	-	-	GO:0097159//organic cyclic compound binding;GO:0003723//RNA binding;GO:1901363//heterocyclic compound binding;GO:0003674//molecular_function;GO:0003676//nucleic acid binding;GO:0005488//binding	-
Bra003619	0.656667	0.001	-9.35902	no	2.43	0.001	-11.2467	yes	0.001	0.001	0	notest	ATMYB63	AT1G79180 (E=1e-098) ATMYB63, MYB63 | MYB63 (MYB DOMAIN PROTEIN 63); DNA binding / transcription activator/ transcription factor	-	-	-	-	-	GO:0005488//binding;GO:0097159//organic cyclic compound binding;GO:1901363//heterocyclic compound binding;GO:0003674//molecular_function;GO:0044877//macromolecular complex binding;GO:0003676//nucleic acid binding;GO:0003682//chromatin binding;GO:0003677//DNA binding	-
Bra003631	0.306667	1.71	2.47925	no	0.57	22.45	5.29961	yes	0.001	0.43	8.74819	no	-	-	-	-	-	-	-	-	-
Bra003635	6.94667	0.166667	-5.38128	yes	978.163	0.32	-11.5778	yes	101.11	0.09	-10.1337	yes	-	-	-	-	-	-	-	-	-
Bra003644	475.157	390.787	-0.282022	no	317.967	332.493	0.0644499	no	313.457	136.35	-1.20095	yes	-	AT1G78380 (E=8e-103) ATGSTU19, GST8 | ATGSTU19 (GLUTATHIONE S-TRANSFERASE TAU 19); glutathione binding / glutathione transferase	Metabolism	Metabolism of other amino acids	ko00480//Glutathione metabolism	K00799	-	GO:0005488//binding;GO:0003674//molecular_function;GO:0005515//protein binding	-
Bra003650	1.25	0.316667	-1.98089	yes	0.516667	0.22	-1.23173	no	2.59333	1.11333	-1.21992	no	-	AT1G78290 (E=1e-155) | serine/threonine protein kinase, putative	Environmental Information Processing	Signal transduction	ko04075//Plant hormone signal transduction	K14498	GO:0044424//intracellular part;GO:0043229//intracellular organelle;GO:0005622//intracellular;GO:0043231//intracellular membrane-bounded organelle;GO:0043226//organelle;GO:0044464//cell part;GO:0005623//cell;GO:0005575//cellular_component;GO:0005634//nucleus;GO:0005737//cytoplasm;GO:0043227//membrane-bounded organelle	GO:1901265//nucleoside phosphate binding;GO:1901363//heterocyclic compound binding;GO:0000166//nucleotide binding;GO:0003674//molecular_function;GO:0016301//kinase activity;GO:0036094//small molecule binding;GO:0003824//catalytic activity;GO:0005488//binding;GO:0016740//transferase activity;GO:0097159//organic cyclic compound binding;GO:0016772//transferase activity, transferring phosphorus-conta…	GO:0006950//response to stress;GO:0008150//biological_process;GO:0036211//protein modification process;GO:0043412//macromolecule modification;GO:0009628//response to abiotic stimulus;GO:0044238//primary metabolic process;GO:0044260//cellular macromolecule metabolic process;GO:0009987//cellular process;GO:0044267//cellular protein metabolic process;GO:0008152//metabolic process;GO:0050896//respons…
Bra003651	1.90333	1.56333	-0.283903	no	7.9	2.42	-1.70685	yes	0.05	0.14	1.48543	no	-	AT1G78260 (E=2e-073) | RNA recognition motif (RRM)-containing protein	-	-	-	-	-	GO:0036094//small molecule binding;GO:1901265//nucleoside phosphate binding;GO:0005488//binding;GO:0097159//organic cyclic compound binding;GO:0000166//nucleotide binding;GO:1901363//heterocyclic compound binding;GO:0003676//nucleic acid binding;GO:0003674//molecular_function	-
Bra003654	1.16333	0.406667	-1.51635	no	1.35	0.216667	-2.63941	yes	0.24	0.07	-1.77761	no	-	-	-	-	-	-	-	-	-
Bra003655	11.07	0.29	-5.25446	yes	1.56	0.05	-4.96347	yes	1.21667	0.1	-3.60486	yes	-	-	-	-	-	-	-	-	-
Bra003656	0.001	0.001	0	notest	0.001	0.001	0	notest	4.74333	0.001	-12.2117	yes	-	-	-	-	-	-	-	-	-
Bra003658	0.87	0.123333	-2.81845	yes	2.29	0.04	-5.8392	yes	0.001	0.001	0	notest	-	-	-	-	-	-	-	-	-
Bra003661	0.09	10.38	6.84967	yes	0.001	12.3367	13.5907	yes	0.001	3.24	11.6618	yes	-	-	-	-	-	-	-	-	-
Bra003670	2.13333	0.626667	-1.76734	yes	1.02	0.283333	-1.848	no	30.6833	20.23	-0.600959	no	-	AT1G77760 (E=0.0) NIA1, GNR1, NR1 | NIA1 (NITRATE REDUCTASE 1); nitrate reductase	Metabolism	Energy metabolism	ko00910//Nitrogen metabolism	K10534	-	GO:0097159//organic cyclic compound binding;GO:0005488//binding;GO:0036094//small molecule binding;GO:0003824//catalytic activity;GO:0003674//molecular_function;GO:1901265//nucleoside phosphate binding;GO:1901363//heterocyclic compound binding;GO:0000166//nucleotide binding	GO:0009987//cellular process;GO:0008152//metabolic process;GO:0009058//biosynthetic process;GO:0008150//biological_process
Bra003686	0.001	0.001	0	notest	0.001	0.001	0	notest	2.47667	0.001	-11.2742	yes	-	-	-	-	-	-	-	-	-
Bra003692	21.0233	6.86	-1.61571	yes	18.76	5.49333	-1.77191	yes	2.42	3.32333	0.457624	no	-	AT1G77000 (E=2e-185) ATSKP2;2, SKP2B | SKP2B; ubiquitin-protein ligase	Genetic Information Processing	Folding, sorting and degradation	ko04120//Ubiquitin mediated proteolysis	K03875	-	GO:0003674//molecular_function;GO:0005515//protein binding;GO:0005488//binding	-
Bra003693	7.20333	13.5367	0.910136	no	4.77667	13.5267	1.50173	yes	17.06	27.24	0.675109	no	-	AT1G76990 (E=9e-248) ACR3 | ACR3; amino acid binding	-	-	-	-	-	GO:0003674//molecular_function;GO:0005488//binding	GO:0008150//biological_process;GO:0008152//metabolic process
Bra003705	0.976667	3.56333	1.86729	no	1.32333	3.95667	1.58011	no	0.35	2.95333	3.07692	yes	-	-	-	-	-	-	-	-	-
Bra003712	2.88	1.42	-1.02018	no	0.656667	0.646667	-0.022139	no	3.54	0.683333	-2.37309	yes	-	AT1G76650 (E=8e-078) CML38 | calcium-binding EF hand family protein	Organismal Systems	Environmental adaptation	ko04626//Plant-pathogen interaction	K13448	-	GO:0003674//molecular_function;GO:0005488//binding	-
Bra003713	39.95	6.50667	-2.6182	yes	88.8167	8.85	-3.32708	yes	2.45	3.51	0.518689	no	-	-	-	-	-	-	-	-	-
Bra003720	21.96	18.9567	-0.212173	no	14.9567	3.79333	-1.97925	yes	0.243333	0.223333	-0.123735	no	-	AT1G76410 (E=2e-061) ATL8 | ATL8; protein binding / zinc ion binding	-	-	-	-	-	GO:0005488//binding;GO:0003674//molecular_function;GO:0005515//protein binding	-
Bra003724	0.136667	0.001	-7.09452	no	0.736667	0.001	-9.52487	yes	3.94	0.0233333	-7.39966	yes	-	AT1G76360 (E=1e-189) | protein kinase, putative	-	-	-	-	-	GO:1901363//heterocyclic compound binding;GO:0016772//transferase activity, transferring phosphorus-containing groups;GO:0016740//transferase activity;GO:0003824//catalytic activity;GO:0000166//nucleotide binding;GO:0003674//molecular_function;GO:0036094//small molecule binding;GO:0005488//binding;GO:0016301//kinase activity;GO:0097159//organic cyclic compound binding;GO:1901265//nucleoside phosp…	GO:0019538//protein metabolic process;GO:0008150//biological_process;GO:0006464//cellular protein modification process;GO:0044267//cellular protein metabolic process;GO:0009987//cellular process;GO:0044260//cellular macromolecule metabolic process;GO:0043412//macromolecule modification;GO:0071704//organic substance metabolic process;GO:0043170//macromolecule metabolic process;GO:0036211//protein …
Bra003728	6.48	19.4133	1.58298	yes	5.58333	7.30333	0.387428	no	0.176667	0.15	-0.236067	no	-	-	-	-	-	-	-	-	-
Bra003732	12.7767	14.5167	0.184199	no	263.177	130.297	-1.01423	yes	5.37667	5.43	0.0142402	no	ERD14	AT1G76180 (E=2e-017) ERD14 | ERD14 (EARLY RESPONSE TO DEHYDRATION 14); calcium ion binding	-	-	-	-	-	-	GO:0050896//response to stimulus;GO:0006950//response to stress;GO:0009628//response to abiotic stimulus;GO:0008150//biological_process
Bra003733	4.16667	35.7867	3.10246	yes	5.01667	43.9	3.12942	yes	4.25333	47.2267	3.47294	yes	-	AT1G76010 (E=5e-085) | nucleic acid binding	-	-	-	-	-	GO:0003676//nucleic acid binding;GO:0003674//molecular_function;GO:0005488//binding;GO:0097159//organic cyclic compound binding;GO:1901363//heterocyclic compound binding	-
Bra003736	422.457	209.547	-1.01153	yes	166.13	157.407	-0.077816	no	0.24	0.426667	0.830075	no	-	AT1G75900 (E=8e-163) | family II extracellular lipase 3 (EXL3)	-	-	-	-	-	GO:0003674//molecular_function;GO:0016787//hydrolase activity;GO:0003824//catalytic activity	GO:0044710//single-organism metabolic process;GO:0044238//primary metabolic process;GO:0071704//organic substance metabolic process;GO:0006629//lipid metabolic process;GO:0044699//single-organism process;GO:0008150//biological_process;GO:0008152//metabolic process
Bra003739	18.21	1.56667	-3.53896	yes	16.8267	1.82333	-3.2061	yes	8.61667	1.72333	-2.32193	yes	-	AT1G75840 (E=2e-099) ARAC5, ATGP3, ROP4, ATROP4 | ARAC5 (RAC-LIKE GTP BINDING PROTEIN 5); GTP binding / GTPase	Cellular Processes	Transport and catabolism	ko04145//Phagosome	K04392	GO:0005622//intracellular;GO:0005623//cell;GO:0005575//cellular_component;GO:0044464//cell part;GO:0016020//membrane	GO:0005488//binding;GO:0036094//small molecule binding;GO:0097159//organic cyclic compound binding;GO:0003674//molecular_function;GO:0000166//nucleotide binding;GO:1901265//nucleoside phosphate binding;GO:1901363//heterocyclic compound binding	GO:0050896//response to stimulus;GO:0050789//regulation of biological process;GO:0007154//cell communication;GO:0044763//single-organism cellular process;GO:0044700//single organism signaling;GO:0051716//cellular response to stimulus;GO:0009987//cellular process;GO:0008150//biological_process;GO:0065007//biological regulation;GO:0044699//single-organism process;GO:0050794//regulation of cellular …
Bra003759	0.0466667	0.143333	1.61891	no	0.403333	1.68333	2.06128	no	1.23	0.336667	-1.86927	yes	AtHB33	AT1G75240 (E=2e-094) AtHB33 | AtHB33 (ARABIDOPSIS THALIANA HOMEOBOX PROTEIN 33); DNA binding / transcription factor	-	-	-	-	-	GO:0003676//nucleic acid binding;GO:0097159//organic cyclic compound binding;GO:0003674//molecular_function;GO:0005488//binding;GO:0003677//DNA binding;GO:1901363//heterocyclic compound binding	-
Bra003773	1.44	0.001	-10.4919	yes	0.256667	0.693333	1.43365	no	0.001	0.001	0	notest	-	AT1G64105 (E=8e-023) ANAC027 | ANAC027 (Arabidopsis NAC domain containing protein 27); transcription factor	-	-	-	-	GO:0005634//nucleus;GO:0043231//intracellular membrane-bounded organelle;GO:0043229//intracellular organelle;GO:0043227//membrane-bounded organelle;GO:0005575//cellular_component;GO:0005622//intracellular;GO:0044464//cell part;GO:0005623//cell;GO:0044424//intracellular part;GO:0043226//organelle	GO:1901363//heterocyclic compound binding;GO:0003677//DNA binding;GO:0003676//nucleic acid binding;GO:0005488//binding;GO:0003674//molecular_function;GO:0097159//organic cyclic compound binding	GO:0044237//cellular metabolic process;GO:0071704//organic substance metabolic process;GO:0009987//cellular process;GO:1901360//organic cyclic compound metabolic process;GO:0008150//biological_process;GO:0044238//primary metabolic process;GO:0046483//heterocycle metabolic process;GO:0008152//metabolic process;GO:0009058//biosynthetic process;GO:0006139//nucleobase-containing compound metabolic pr…
Bra003780	2.66333	8.6	1.6911	yes	5.12	11.1867	1.12756	no	1.29333	1.83	0.500749	no	-	AT1G74930 (E=3e-052) ORA47 | ORA47; DNA binding / transcription factor	-	-	-	-	GO:0043227//membrane-bounded organelle;GO:0005623//cell;GO:0005634//nucleus;GO:0043226//organelle;GO:0043231//intracellular membrane-bounded organelle;GO:0044424//intracellular part;GO:0005575//cellular_component;GO:0044464//cell part;GO:0043229//intracellular organelle;GO:0005622//intracellular	GO:0003700//transcription factor activity, sequence-specific DNA binding;GO:0097159//organic cyclic compound binding;GO:0003676//nucleic acid binding;GO:0003677//DNA binding;GO:1901363//heterocyclic compound binding;GO:0003674//molecular_function;GO:0005488//binding;GO:0001071//nucleic acid binding transcription factor activity	GO:0009987//cellular process;GO:0008150//biological_process;GO:0006807//nitrogen compound metabolic process;GO:0009058//biosynthetic process;GO:0044238//primary metabolic process;GO:1901360//organic cyclic compound metabolic process;GO:0034641//cellular nitrogen compound metabolic process;GO:0071704//organic substance metabolic process;GO:0046483//heterocycle metabolic process;GO:0008152//metabol…
Bra003787	4.68333	1.39667	-1.74555	yes	5.64	1.84333	-1.61338	yes	3.49667	1.17	-1.57947	yes	-	AT1G74750 (E=9e-265) | pentatricopeptide (PPR) repeat-containing protein	-	-	-	-	-	GO:0003674//molecular_function;GO:0005488//binding;GO:0005515//protein binding	-
Bra003807	47.9967	25.8133	-0.894818	no	236.433	95.06	-1.31452	yes	14.3333	2.63333	-2.44441	yes	-	AT1G74310 (E=0.0) ATHSP101, HSP101, HOT1 | ATHSP101 (ARABIDOPSIS THALIANA HEAT SHOCK PROTEIN 101); ATP binding / ATPase/ nucleoside-triphosphatase/ nucleotide binding / protein binding	-	-	-	-	-	GO:0003824//catalytic activity;GO:0097159//organic cyclic compound binding;GO:0036094//small molecule binding;GO:0003674//molecular_function;GO:1901265//nucleoside phosphate binding;GO:0000166//nucleotide binding;GO:1901363//heterocyclic compound binding;GO:0016787//hydrolase activity;GO:0005488//binding	GO:0008152//metabolic process;GO:0008150//biological_process;GO:0043170//macromolecule metabolic process;GO:0044238//primary metabolic process;GO:0019538//protein metabolic process;GO:0071704//organic substance metabolic process
Bra003817	0.123333	0.0433333	-1.50901	no	0.6	1.54333	1.36302	no	1.76667	0.393333	-2.16721	yes	-	AT1G74090 (E=8e-064) SOT18, ATSOT18, ATST5B | SOT18 (DESULFO-GLUCOSINOLATE SULFOTRANSFERASE 18); 3-methylthiopropyl-desulfoglucosinolate sulfotransferase/ 4-methylthiobutyl-desulfoglucosinolate sulfotransferase/ 5-methylthiopentyl-desulfoglucosinolate sulfotransferase/ 7-methylthioheptyl-desulfogluco	-	-	-	-	-	GO:0003824//catalytic activity;GO:0003674//molecular_function;GO:0016740//transferase activity	-
Bra003824	14.8033	52.0267	1.81333	yes	38.0533	31.7567	-0.260963	no	10.9967	7.60667	-0.53173	no	-	AT1G73880 (E=4e-237) UGT89B1 | UGT89B1 (UDP-GLUCOSYL TRANSFERASE 89B1); UDP-glycosyltransferase/ quercetin 3-O-glucosyltransferase/ quercetin 4'-O-glucosyltransferase/ quercetin 7-O-glucosyltransferase/ transferase, transferring glycosyl groups / transferase, transferring hexosyl group	-	-	-	-	-	GO:0003674//molecular_function;GO:0003824//catalytic activity;GO:0016740//transferase activity	GO:0008152//metabolic process;GO:0008150//biological_process
Bra003825	0.001	0.253333	7.98489	yes	0.001	0.44	8.78136	yes	0.0266667	0.02	-0.415037	no	-	AT1G73860 (E=0.0) | ATP binding / microtubule motor	-	-	-	-	GO:0005622//intracellular;GO:0005575//cellular_component;GO:0005856//cytoskeleton;GO:0043228//non-membrane-bounded organelle;GO:0005623//cell;GO:0044464//cell part;GO:0044424//intracellular part;GO:0043232//intracellular non-membrane-bounded organelle;GO:0043226//organelle;GO:0043229//intracellular organelle	GO:0005515//protein binding;GO:1901363//heterocyclic compound binding;GO:1901265//nucleoside phosphate binding;GO:0016787//hydrolase activity;GO:0016817//hydrolase activity, acting on acid anhydrides;GO:0017111//nucleoside-triphosphatase activity;GO:0097159//organic cyclic compound binding;GO:0016462//pyrophosphatase activity;GO:0036094//small molecule binding;GO:0000166//nucleotide binding;GO:00…	GO:0008150//biological_process;GO:0009987//cellular process
Bra003834	0.593333	2.33	1.97342	yes	2.3	3.49	0.601593	no	0.1	0.593333	2.56884	yes	ATMPK15	AT1G73670 (E=7e-252) ATMPK15 | ATMPK15; MAP kinase/ kinase	-	-	-	-	-	GO:0003674//molecular_function;GO:0000166//nucleotide binding;GO:0016740//transferase activity;GO:0016301//kinase activity;GO:0003824//catalytic activity;GO:0004871//signal transducer activity;GO:0036094//small molecule binding;GO:0016772//transferase activity, transferring phosphorus-containing groups;GO:1901363//heterocyclic compound binding;GO:0097159//organic cyclic compound binding;GO:000548…	GO:0036211//protein modification process;GO:0050789//regulation of biological process;GO:0043412//macromolecule modification;GO:0051716//cellular response to stimulus;GO:0007165//signal transduction;GO:0050896//response to stimulus;GO:0008150//biological_process;GO:0019538//protein metabolic process;GO:0044237//cellular metabolic process;GO:0009987//cellular process;GO:0043170//macromolecule meta…
Bra003835	1.35	14.36	3.41102	yes	1.03333	11.52	3.47876	yes	1.58667	4.08333	1.36375	yes	-	AT1G73655 (E=3e-100) | FK506 binding / peptidyl-prolyl cis-trans isomerase	-	-	-	-	-	GO:0003674//molecular_function;GO:0003824//catalytic activity	GO:0044267//cellular protein metabolic process;GO:0044238//primary metabolic process;GO:0008150//biological_process;GO:0005975//carbohydrate metabolic process;GO:0043170//macromolecule metabolic process;GO:0071704//organic substance metabolic process;GO:0044237//cellular metabolic process;GO:0009987//cellular process;GO:0008152//metabolic process;GO:0044260//cellular macromolecule metabolic proce…
Bra003843	11.5033	6.00667	-0.937415	no	20.54	6.72333	-1.61119	yes	4.16667	2.28667	-0.865648	no	-	-	-	-	-	-	-	-	-
Bra003847	5	1.08667	-2.20202	yes	8.39667	1.59	-2.40079	yes	2.52	0.0466667	-5.75489	yes	-	-	-	-	-	-	-	-	-
Bra003850	1.79333	9.56	2.41437	yes	160.073	13.7667	-3.53948	yes	70.26	11.47	-2.61484	yes	-	AT1G73260 (E=5e-079) | trypsin and protease inhibitor family protein / Kunitz family protein	-	-	-	-	-	GO:0003674//molecular_function;GO:0098772//molecular function regulator;GO:0030234//enzyme regulator activity	GO:0071704//organic substance metabolic process;GO:0044238//primary metabolic process;GO:0008152//metabolic process;GO:0009987//cellular process;GO:0043170//macromolecule metabolic process;GO:0008150//biological_process;GO:0019538//protein metabolic process
Bra003859	82.27	0.943333	-6.44645	yes	87.0233	0.35	-7.9579	yes	24.7367	0.11	-7.813	yes	-	AT1G73030 (E=7e-093) VPS46.2 | VPS46.2	Cellular Processes	Transport and catabolism	ko04144//Endocytosis	K12197	-	-	GO:0006810//transport;GO:0051179//localization;GO:0051234//establishment of localization;GO:0008150//biological_process
Bra003860	0.64	0.001	-9.32193	yes	0.143333	0.001	-7.16323	no	9.93667	0.001	-13.2785	yes	-	-	-	-	-	-	-	-	-
Bra003861	1.75	4.71	1.42837	yes	0.48	3.32667	2.79297	yes	0.716667	0.9	0.328623	no	BGAL17	AT1G72990 (E=3e-262) BGAL17 | BGAL17 (beta-galactosidase 17); beta-galactosidase/ catalytic/ cation binding	Metabolism	Carbohydrate metabolism;Glycan biosynthesis and metabolism;Lipid metabolism	ko00052//Galactose metabolism;ko00600//Sphingolipid metabolism;ko00511//Other glycan degradation;ko00531//Glycosaminoglycan degradation;ko00604//Glycosphingolipid biosynthesis - ganglio series	K12309	-	GO:0003824//catalytic activity;GO:0003674//molecular_function;GO:0016787//hydrolase activity	GO:0005975//carbohydrate metabolic process;GO:0009791//post-embryonic development;GO:0008150//biological_process;GO:0019538//protein metabolic process;GO:0043412//macromolecule modification;GO:0043170//macromolecule metabolic process;GO:0044237//cellular metabolic process;GO:0044238//primary metabolic process;GO:0007275//multicellular organism development;GO:0044767//single-organism developmental…
Bra003864	0.763333	2.28	1.57865	no	4.10333	2.02333	-1.02006	no	2.04333	0.196667	-3.3771	yes	-	AT1G72890 (E=4e-128) | disease resistance protein (TIR-NBS class), putative	-	-	-	-	-	GO:1901265//nucleoside phosphate binding;GO:0005515//protein binding;GO:0003674//molecular_function;GO:0036094//small molecule binding;GO:0005488//binding;GO:0000166//nucleotide binding;GO:0097159//organic cyclic compound binding;GO:1901363//heterocyclic compound binding	GO:0023052//signaling;GO:0044699//single-organism process;GO:0008150//biological_process;GO:0050794//regulation of cellular process;GO:0050896//response to stimulus;GO:0051716//cellular response to stimulus;GO:0009987//cellular process;GO:0044763//single-organism cellular process;GO:0065007//biological regulation;GO:0050789//regulation of biological process;GO:0044700//single organism signaling;G…
Bra003869	83.85	10.89	-2.94481	yes	108.293	11.51	-3.23398	yes	7.84667	1.59333	-2.30003	yes	-	-	-	-	-	-	-	-	-
Bra003873	0.116667	0.001	-6.86625	no	0.176667	0.001	-7.46489	no	0.686667	0.0833333	-3.04264	yes	-	-	-	-	-	-	-	-	-
Bra003886	1.55667	0.376667	-2.0471	yes	1.6	1.12	-0.514573	no	14.2633	8.53	-0.741694	no	-	AT1G72210 (E=3e-123) | basic helix-loop-helix (bHLH) family protein (bHLH096)	-	-	-	-	-	GO:0005515//protein binding;GO:0005488//binding;GO:0003674//molecular_function	-
Bra003889	29.4	7.64333	-1.94354	yes	18.4767	10.7433	-0.782263	no	5.16667	6.86333	0.409676	no	-	AT1G72180 (E=0.0) | leucine-rich repeat transmembrane protein kinase, putative	-	-	-	-	GO:0016020//membrane;GO:0005575//cellular_component	GO:0005488//binding;GO:1901265//nucleoside phosphate binding;GO:0005515//protein binding;GO:1901363//heterocyclic compound binding;GO:0016772//transferase activity, transferring phosphorus-containing groups;GO:0097159//organic cyclic compound binding;GO:0036094//small molecule binding;GO:0003824//catalytic activity;GO:0016301//kinase activity;GO:0003674//molecular_function;GO:0016740//transferase…	GO:0009987//cellular process;GO:0044267//cellular protein metabolic process;GO:0044260//cellular macromolecule metabolic process;GO:0043412//macromolecule modification;GO:0008150//biological_process;GO:0019538//protein metabolic process;GO:0044238//primary metabolic process;GO:0044237//cellular metabolic process;GO:0036211//protein modification process;GO:0071704//organic substance metabolic proc…
Bra003892	0.226667	3.22	3.82842	yes	0.86	4.37333	2.34632	yes	0.236667	0.163333	-0.535037	no	-	AT1G72150 (E=3e-181) PATL1 | PATL1 (PATELLIN 1); transporter	-	-	-	-	GO:0016020//membrane;GO:0005575//cellular_component	-	GO:0051234//establishment of localization;GO:0008150//biological_process;GO:0006810//transport;GO:0051179//localization
Bra003894	1.48333	4.17333	1.49236	yes	1.02667	1.46	0.508001	no	0.426667	0.233333	-0.870717	no	-	AT1G72140 (E=1e-244) | proton-dependent oligopeptide transport (POT) family protein	-	-	-	-	GO:0043227//membrane-bounded organelle;GO:0016020//membrane;GO:0044464//cell part;GO:0005773//vacuole;GO:0044444//cytoplasmic part;GO:0044424//intracellular part;GO:0005737//cytoplasm;GO:0005575//cellular_component;GO:0005622//intracellular;GO:0043231//intracellular membrane-bounded organelle;GO:0005623//cell;GO:0043229//intracellular organelle;GO:0043226//organelle	GO:0005215//transporter activity;GO:0003674//molecular_function	GO:0008150//biological_process;GO:0051234//establishment of localization;GO:0051179//localization;GO:0006810//transport
Bra003896	0.103333	1.09333	3.40336	yes	0.0466667	3.15	6.07682	yes	0.82	0.443333	-0.887232	no	-	AT1G72130 (E=1e-221) | proton-dependent oligopeptide transport (POT) family protein	-	-	-	-	GO:0016020//membrane;GO:0005575//cellular_component	GO:0005215//transporter activity;GO:0003674//molecular_function	GO:0006810//transport;GO:0051179//localization;GO:0008150//biological_process;GO:0051234//establishment of localization
Bra003897	0.0733333	1.26	4.10281	yes	0.133333	7.82667	5.87529	yes	6.00667	0.253333	-4.56746	yes	-	AT1G72130 (E=1e-205) | proton-dependent oligopeptide transport (POT) family protein	-	-	-	-	GO:0005575//cellular_component;GO:0016020//membrane	GO:0003674//molecular_function;GO:0005215//transporter activity	GO:0008150//biological_process;GO:0051179//localization;GO:0051234//establishment of localization;GO:0006810//transport
Bra003898	6.81333	0.283333	-4.58779	yes	10.9033	0.146667	-6.21608	yes	8.12333	0.18	-5.496	yes	-	AT1G72125 (E=1e-226) | transporter	-	-	-	-	GO:0005575//cellular_component;GO:0016020//membrane	GO:0003674//molecular_function;GO:0005215//transporter activity	GO:0006810//transport;GO:0008150//biological_process;GO:0051179//localization;GO:0051234//establishment of localization
Bra003899	13.91	3.82	-1.86448	yes	12.3833	2.72667	-2.18319	yes	6.6	1.81	-1.86648	yes	-	AT1G72050 (E=8e-124) TFIIIA | TFIIIA (TRANSCRIPTION FACTOR IIIA); 5S rDNA binding / 5S rRNA binding / nucleic acid binding / transcription factor/ zinc ion binding	-	-	-	-	-	GO:0005488//binding;GO:0003676//nucleic acid binding;GO:1901363//heterocyclic compound binding;GO:0003674//molecular_function;GO:0097159//organic cyclic compound binding	-
Bra003906	3.27	29.1567	3.15646	yes	3.90333	7.47333	0.937045	no	10.66	7.48667	-0.509812	no	-	AT1G71880 (E=2e-229) SUC1, ATSUC1 | SUC1 (Sucrose-proton symporter 1); carbohydrate transmembrane transporter/ sucrose:hydrogen symporter/ sugar:hydrogen symporter	-	-	-	-	GO:0016020//membrane;GO:0005886//plasma membrane;GO:0044464//cell part;GO:0005623//cell;GO:0071944//cell periphery;GO:0005575//cellular_component	GO:0003674//molecular_function;GO:0005215//transporter activity	GO:0008150//biological_process;GO:0006810//transport;GO:0051179//localization;GO:0051234//establishment of localization;GO:0009987//cellular process
Bra003909	131.743	26.4467	-2.31657	yes	76.2267	19.3567	-1.97747	yes	4.71667	0.856667	-2.46096	yes	-	AT2G46960 (E=8e-132) CYP709B1 | CYP709B1; electron carrier/ heme binding / iron ion binding / monooxygenase/ oxygen binding	Metabolism	Metabolism of terpenoids and polyketides	ko00905//Brassinosteroid biosynthesis	K15639	-	GO:0003674//molecular_function;GO:0003824//catalytic activity;GO:0005488//binding	GO:0008150//biological_process;GO:0008152//metabolic process
Bra003918	2.11333	1.80333	-0.228854	no	4.13667	3.58	-0.208509	no	1.02	0.113333	-3.16993	yes	-	AT1G71695 (E=7e-175) | peroxidase 12 (PER12) (P12) (PRXR6)	Metabolism	Biosynthesis of other secondary metabolites	ko00940//Phenylpropanoid biosynthesis	K00430	-	GO:0003674//molecular_function;GO:0003824//catalytic activity;GO:0005488//binding	GO:0008150//biological_process;GO:0050896//response to stimulus;GO:0006950//response to stress;GO:0008152//metabolic process
Bra003925	0.0166667	0.001	-4.05889	no	0.0133333	0.001	-3.73697	no	0.0133333	0.263333	4.30378	yes	-	AT1G71400 (E=9e-238) AtRLP12 | AtRLP12 (Receptor Like Protein 12); protein binding	-	-	-	-	-	GO:0005488//binding;GO:0003674//molecular_function;GO:0005515//protein binding	-
Bra003953	0.48	0.623333	0.376969	no	4.83333	1.14333	-2.07977	yes	6.99333	1.65333	-2.0806	yes	-	AT3G29670 (E=3e-158) | transferase family protein	-	-	-	-	-	GO:0016740//transferase activity;GO:0003824//catalytic activity;GO:0003674//molecular_function	-
Bra003954	0.0766667	0.943333	3.6211	no	0.001	1.41667	10.4683	yes	0.0666667	2.46667	5.20945	yes	-	AT1G70490 (E=6e-095) ATARFA1D, ARFA1D | ARFA1D; GTP binding / phospholipase activator/ protein binding	Cellular Processes	Transport and catabolism	ko04144//Endocytosis	K07937	GO:0005622//intracellular;GO:0005575//cellular_component;GO:0044464//cell part;GO:0005623//cell	GO:1901363//heterocyclic compound binding;GO:0003674//molecular_function;GO:0097159//organic cyclic compound binding;GO:0005488//binding;GO:0000166//nucleotide binding;GO:1901265//nucleoside phosphate binding;GO:0036094//small molecule binding	GO:0008150//biological_process;GO:0044699//single-organism process;GO:0023052//signaling;GO:0051716//cellular response to stimulus;GO:0050789//regulation of biological process;GO:0044700//single organism signaling;GO:0065007//biological regulation;GO:0007154//cell communication;GO:0044763//single-organism cellular process;GO:0009987//cellular process;GO:0007165//signal transduction;GO:0050794//re…
Bra003960	5.86	5.20667	-0.170541	no	8.79333	2.13333	-2.0433	yes	0.23	0.183333	-0.327165	no	-	AT1G70230 (E=5e-183) | unknown protein	-	-	-	-	GO:0044444//cytoplasmic part;GO:0012505//endomembrane system;GO:0005575//cellular_component;GO:0043227//membrane-bounded organelle;GO:0043229//intracellular organelle;GO:0043226//organelle;GO:0005623//cell;GO:0044424//intracellular part;GO:0005622//intracellular;GO:0043231//intracellular membrane-bounded organelle;GO:0044464//cell part;GO:0005794//Golgi apparatus;GO:0005737//cytoplasm	GO:0003824//catalytic activity;GO:0016740//transferase activity;GO:0003674//molecular_function	GO:0008150//biological_process;GO:0044238//primary metabolic process;GO:0071704//organic substance metabolic process;GO:0008152//metabolic process;GO:0009987//cellular process;GO:0005975//carbohydrate metabolic process
Bra003962	11.4433	2.60667	-2.13423	yes	7.67	5.29333	-0.53505	no	7.7	2.89333	-1.41213	yes	-	AT1G70200 (E=2e-081) | RNA recognition motif (RRM)-containing protein	-	-	-	-	GO:0005575//cellular_component;GO:0005737//cytoplasm;GO:0043229//intracellular organelle;GO:0044444//cytoplasmic part;GO:0043226//organelle;GO:0043231//intracellular membrane-bounded organelle;GO:0005622//intracellular;GO:0005623//cell;GO:0044424//intracellular part;GO:0043227//membrane-bounded organelle;GO:0009536//plastid;GO:0044464//cell part	GO:0000166//nucleotide binding;GO:0003674//molecular_function;GO:0036094//small molecule binding;GO:0097159//organic cyclic compound binding;GO:0005488//binding;GO:1901265//nucleoside phosphate binding;GO:0003676//nucleic acid binding;GO:1901363//heterocyclic compound binding	GO:1901360//organic cyclic compound metabolic process;GO:0008152//metabolic process;GO:0034641//cellular nitrogen compound metabolic process;GO:0071840//cellular component organization or biogenesis;GO:0016043//cellular component organization;GO:0051179//localization;GO:0044238//primary metabolic process;GO:0006810//transport;GO:0009987//cellular process;GO:0046483//heterocycle metabolic process;…
Bra003965	0.273333	1.32333	2.27544	yes	0.693333	0.686667	-0.0139392	no	1.76667	0.493333	-1.8404	yes	-	AT1G70170 (E=5e-198) MMP | MMP (MATRIX METALLOPROTEINASE); metalloendopeptidase/ metallopeptidase	-	-	-	-	GO:0005575//cellular_component	GO:0016787//hydrolase activity;GO:0003674//molecular_function;GO:0003824//catalytic activity;GO:0005488//binding	GO:0071704//organic substance metabolic process;GO:0043170//macromolecule metabolic process;GO:0044238//primary metabolic process;GO:0008152//metabolic process;GO:0019538//protein metabolic process;GO:0008150//biological_process
Bra003969	1.63667	1.11333	-0.555875	no	15.65	10.0133	-0.64424	no	2.54	0.52	-2.28824	yes	-	AT1G70000 (E=2e-082) | DNA-binding family protein	-	-	-	-	-	GO:0003674//molecular_function;GO:0005488//binding;GO:1901363//heterocyclic compound binding;GO:0003682//chromatin binding;GO:0097159//organic cyclic compound binding;GO:0003677//DNA binding;GO:0003676//nucleic acid binding;GO:0044877//macromolecular complex binding	-
Bra003975	14.39	41.2333	1.51874	yes	5.41	18.8467	1.80061	yes	1.37667	5.74667	2.06155	yes	-	-	-	-	-	-	-	-	-
Bra003979	7.92667	44.0733	2.47512	yes	4.91	46.24	3.23535	yes	19.7933	26.87	0.440982	no	-	AT1G69870 (E=1e-132) | proton-dependent oligopeptide transport (POT) family protein	-	-	-	-	GO:0016020//membrane;GO:0005575//cellular_component	GO:0003674//molecular_function;GO:0005215//transporter activity	GO:0051234//establishment of localization;GO:0006810//transport;GO:0051179//localization;GO:0008150//biological_process
Bra003981	0.83	1.03	0.311461	no	0.001	1.39	10.4409	yes	18.8167	39.01	1.05183	yes	-	-	-	-	-	-	-	-	-
Bra003985	0.001	3.42333	11.7412	yes	0.001	1.29333	10.3369	no	0.001	0.0733333	6.1964	no	-	AT5G02960 (E=3e-066) | 40S ribosomal protein S23 (RPS23B)	Genetic Information Processing	Translation	ko03010//Ribosome	K02973	GO:0043229//intracellular organelle;GO:0044424//intracellular part;GO:1990904//ribonucleoprotein complex;GO:0044444//cytoplasmic part;GO:0030529//intracellular ribonucleoprotein complex;GO:0043232//intracellular non-membrane-bounded organelle;GO:0043226//organelle;GO:0044464//cell part;GO:0043228//non-membrane-bounded organelle;GO:0005737//cytoplasm;GO:0032991//macromolecular complex;GO:0005840//…	GO:0005198//structural molecule activity;GO:0003674//molecular_function	GO:0006807//nitrogen compound metabolic process;GO:0008150//biological_process;GO:0043603//cellular amide metabolic process;GO:0044267//cellular protein metabolic process;GO:0043604//amide biosynthetic process;GO:0044237//cellular metabolic process;GO:0071704//organic substance metabolic process;GO:0044260//cellular macromolecule metabolic process;GO:0008152//metabolic process;GO:0043170//macromo…
Bra003988	31.4767	5.1	-2.62571	yes	36.8867	5.38	-2.77742	yes	12.36	1.56333	-2.98298	yes	-	-	-	-	-	-	-	-	-
Bra003998	0.001	1.66667	10.7027	yes	0.001	0.206667	7.69116	no	0.0466667	0.106667	1.19265	no	-	AT1G69490 (E=2e-116) NAP, ANAC029, ATNAP | NAP (NAC-like, activated by AP3/PI); transcription factor	-	-	-	-	GO:0043226//organelle;GO:0005622//intracellular;GO:0044464//cell part;GO:0044424//intracellular part;GO:0005634//nucleus;GO:0043229//intracellular organelle;GO:0005575//cellular_component;GO:0005623//cell;GO:0043227//membrane-bounded organelle;GO:0043231//intracellular membrane-bounded organelle	GO:0003676//nucleic acid binding;GO:0003674//molecular_function;GO:0005488//binding;GO:0097159//organic cyclic compound binding;GO:0003677//DNA binding;GO:1901363//heterocyclic compound binding	GO:0044237//cellular metabolic process;GO:0044238//primary metabolic process;GO:0008152//metabolic process;GO:1901360//organic cyclic compound metabolic process;GO:0006807//nitrogen compound metabolic process;GO:0009058//biosynthetic process;GO:0071704//organic substance metabolic process;GO:0006139//nucleobase-containing compound metabolic process;GO:0008150//biological_process;GO:0034641//cellu…
Bra004004	1.98333	0.686667	-1.53025	no	3.26	1.11333	-1.54999	no	5.26667	2.33333	-1.1745	yes	-	AT1G69260 (E=3e-084) AFP1 | AFP1 (ABI FIVE BINDING PROTEIN)	-	-	-	-	-	-	GO:0008150//biological_process;GO:0023052//signaling;GO:0009987//cellular process;GO:0051716//cellular response to stimulus;GO:0044700//single organism signaling;GO:0044699//single-organism process;GO:0044763//single-organism cellular process;GO:0050896//response to stimulus;GO:0050794//regulation of cellular process;GO:0050789//regulation of biological process;GO:0065007//biological regulation;G…
Bra004016	1.08	2.34333	1.11753	yes	1.17667	2.15333	0.871866	no	1.42667	2.67333	0.905991	no	ATPPC4	AT1G68750 (E=0.0) ATPPC4 | ATPPC4; phosphoenolpyruvate carboxylase	Metabolism	Global and Overview;Energy metabolism;Carbohydrate metabolism	ko01200//Carbon metabolism;ko00620//Pyruvate metabolism;ko00710//Carbon fixation in photosynthetic organisms	K01595	-	GO:0003824//catalytic activity;GO:0003674//molecular_function	GO:0009987//cellular process;GO:0008150//biological_process;GO:0008152//metabolic process;GO:0044237//cellular metabolic process;GO:0006091//generation of precursor metabolites and energy
Bra004023	1.87667	3.73667	0.993579	no	0.403333	4.22333	3.38834	yes	0.41	1.28333	1.6462	no	-	AT1G68680 (E=6e-027) | unknown protein	-	-	-	-	GO:0043229//intracellular organelle;GO:0044444//cytoplasmic part;GO:0043226//organelle;GO:0005737//cytoplasm;GO:0043231//intracellular membrane-bounded organelle;GO:0005739//mitochondrion;GO:0044424//intracellular part;GO:0016020//membrane;GO:0005622//intracellular;GO:0009536//plastid;GO:0005575//cellular_component;GO:0044464//cell part;GO:0005623//cell;GO:0043227//membrane-bounded organelle	-	GO:0008152//metabolic process;GO:0009987//cellular process;GO:0008150//biological_process;GO:0009058//biosynthetic process
Bra004024	0.486667	7.50333	3.94653	yes	1.52667	7.36333	2.26997	yes	0.386667	5.56	3.84592	yes	-	AT1G68660 (E=7e-080) | FUNCTIONS IN: molecular_function unknown; INVOLVED IN: protein catabolic process; EXPRESSED IN: 23 plant structures; EXPRESSED DURING: 14 growth stages; CONTAINS InterPro DOMAIN/s: Adaptor protein ClpS, core (InterPro:IPR003769), Ribosomal protein L7/L12, C-terminal/adaptor protein ClpS-like (InterPro:IPR014719); Has 513 Blast hits to 513 proteins in 129 species: Archae - 0…	-	-	-	-	-	-	GO:0019538//protein metabolic process;GO:0008150//biological_process;GO:0071704//organic substance metabolic process;GO:0044238//primary metabolic process;GO:0008152//metabolic process;GO:0009056//catabolic process;GO:0043170//macromolecule metabolic process
Bra004026	0.646667	5.5	3.08834	yes	1.14	1.36333	0.258105	no	3.53333	1.05667	-1.74151	yes	-	AT1G68620 (E=4e-151) | hydrolase	-	-	-	-	-	GO:0003824//catalytic activity;GO:0016787//hydrolase activity;GO:0003674//molecular_function	GO:0008150//biological_process;GO:0008152//metabolic process
Bra004029	10.15	26.5867	1.38922	yes	9.68667	31.5067	1.70158	yes	10.0933	25.6133	1.34349	yes	-	AT1G68580 (E=3e-134) | agenet domain-containing protein / bromo-adjacent homology (BAH) domain-containing protein	-	-	-	-	-	GO:0003682//chromatin binding;GO:0005488//binding;GO:0003677//DNA binding;GO:0003674//molecular_function;GO:0044877//macromolecular complex binding;GO:1901363//heterocyclic compound binding;GO:0097159//organic cyclic compound binding;GO:0003676//nucleic acid binding	-
Bra004030	1.25	0.001	-10.2877	yes	1.34667	0.001	-10.3952	yes	0.443333	0.02	-4.47032	yes	-	AT1G68570 (E=1e-299) | proton-dependent oligopeptide transport (POT) family protein	-	-	-	-	GO:0005575//cellular_component;GO:0016020//membrane	GO:0005215//transporter activity;GO:0003674//molecular_function	GO:0051179//localization;GO:0008150//biological_process;GO:0006810//transport;GO:0051234//establishment of localization
Bra004033	18.3167	37.06	1.01671	yes	32.0633	52.2633	0.704875	no	5.69667	17.5067	1.61971	yes	-	AT1G68550 (E=4e-070) | AP2 domain-containing transcription factor, putative	-	-	-	-	GO:0043231//intracellular membrane-bounded organelle;GO:0044424//intracellular part;GO:0005622//intracellular;GO:0043227//membrane-bounded organelle;GO:0005575//cellular_component;GO:0043226//organelle;GO:0044464//cell part;GO:0043229//intracellular organelle;GO:0005634//nucleus;GO:0005623//cell	GO:1901363//heterocyclic compound binding;GO:0097159//organic cyclic compound binding;GO:0003700//transcription factor activity, sequence-specific DNA binding;GO:0003674//molecular_function;GO:0003676//nucleic acid binding;GO:0001071//nucleic acid binding transcription factor activity;GO:0003677//DNA binding;GO:0005488//binding	GO:0009058//biosynthetic process;GO:0008150//biological_process;GO:0034641//cellular nitrogen compound metabolic process;GO:0006139//nucleobase-containing compound metabolic process;GO:0044238//primary metabolic process;GO:0009987//cellular process;GO:0071704//organic substance metabolic process;GO:0006725//cellular aromatic compound metabolic process;GO:1901360//organic cyclic compound metabolic…
Bra004034	120.87	57.1367	-1.08097	yes	288.297	72.3067	-1.99535	yes	5.71	2.46333	-1.21288	no	CUT1	AT1G68530 (E=6e-279) CUT1, POP1, CER6, G2, KCS6 | KCS6 (3-KETOACYL-COA SYNTHASE 6); catalytic/ transferase, transferring acyl groups other than amino-acyl groups	Metabolism	Lipid metabolism	ko00062//Fatty acid elongation	K15397	GO:0043227//membrane-bounded organelle;GO:0043226//organelle;GO:0005737//cytoplasm;GO:0016020//membrane;GO:0044464//cell part;GO:0012505//endomembrane system;GO:0005575//cellular_component;GO:0005623//cell;GO:0043231//intracellular membrane-bounded organelle;GO:0044444//cytoplasmic part;GO:0005783//endoplasmic reticulum;GO:0005622//intracellular;GO:0043229//intracellular organelle;GO:0044424//int…	GO:0003824//catalytic activity;GO:0016740//transferase activity;GO:0003674//molecular_function	GO:0016043//cellular component organization;GO:0009058//biosynthetic process;GO:0061458//reproductive system development;GO:0032501//multicellular organismal process;GO:0050896//response to stimulus;GO:0006725//cellular aromatic compound metabolic process;GO:0030154//cell differentiation;GO:0009607//response to biotic stimulus;GO:0009056//catabolic process;GO:0009791//post-embryonic development;G…
Bra004036	39.4067	19.3833	-1.02362	yes	60.88	32.1633	-0.920551	no	24.02	11.61	-1.04887	yes	-	-	-	-	-	-	-	-	-
Bra004052	0.94	0.0366667	-4.68012	yes	1.19667	0.103333	-3.53364	yes	2.74	0.0866667	-4.98255	yes	-	-	-	-	-	-	-	-	-
Bra004053	76.7167	23.6467	-1.6979	yes	50.2633	17.7033	-1.50549	yes	15.98	5.28333	-1.59675	yes	-	AT1G68060 (E=4e-242) ATMAP70-1 | ATMAP70-1 (microtubule-associated proteins 70-1); microtubule binding	-	-	-	-	-	GO:0005488//binding;GO:0003674//molecular_function;GO:0005515//protein binding	GO:0008150//biological_process;GO:0009987//cellular process;GO:0071840//cellular component organization or biogenesis;GO:0016043//cellular component organization
Bra004055	0.206667	1.54667	2.90378	yes	0.543333	0.87	0.679178	no	2.09	1.84333	-0.181186	no	-	AT1G68010 (E=5e-209) HPR | HPR; glycerate dehydrogenase/ poly(U) binding	Metabolism	Amino acid metabolism;Global and Overview;Carbohydrate metabolism	ko01200//Carbon metabolism;ko00630//Glyoxylate and dicarboxylate metabolism;ko00260//Glycine, serine and threonine metabolism	K15893	-	GO:0000166//nucleotide binding;GO:1901265//nucleoside phosphate binding;GO:0097159//organic cyclic compound binding;GO:0003824//catalytic activity;GO:1901363//heterocyclic compound binding;GO:0036094//small molecule binding;GO:0005488//binding;GO:0003674//molecular_function	GO:0008152//metabolic process;GO:0008150//biological_process
Bra004057	221.687	165.88	-0.418382	no	17.6233	42.11	1.25668	yes	0.116667	0.17	0.543142	no	-	AT3G45140 (E=0.0) LOX2, ATLOX2 | LOX2 (LIPOXYGENASE 2); lipoxygenase	Metabolism	Lipid metabolism	ko00592//alpha-Linolenic acid metabolism;ko00591//Linoleic acid metabolism	K00454	-	GO:0003674//molecular_function;GO:0003824//catalytic activity;GO:0005488//binding;GO:0005515//protein binding	GO:0009987//cellular process;GO:0009058//biosynthetic process;GO:0008150//biological_process;GO:0071704//organic substance metabolic process;GO:0044699//single-organism process;GO:0006629//lipid metabolic process;GO:0044238//primary metabolic process;GO:0008152//metabolic process;GO:0044710//single-organism metabolic process
Bra004058	0.24	2.06667	3.1062	yes	0.0133333	0.41	4.94251	yes	0.001	0.001	0	notest	-	AT3G45140 (E=0.0) LOX2, ATLOX2 | LOX2 (LIPOXYGENASE 2); lipoxygenase	Metabolism	Lipid metabolism	ko00592//alpha-Linolenic acid metabolism;ko00591//Linoleic acid metabolism	K00454	-	GO:0003674//molecular_function;GO:0005488//binding;GO:0003824//catalytic activity;GO:0005515//protein binding	GO:0009987//cellular process;GO:0044699//single-organism process;GO:0008150//biological_process;GO:0008152//metabolic process;GO:0006629//lipid metabolic process;GO:0009058//biosynthetic process;GO:0071704//organic substance metabolic process;GO:0044710//single-organism metabolic process;GO:0044238//primary metabolic process
Bra004059	0.001	0.406667	8.6677	yes	0.001	1.26333	10.303	yes	0.0166667	0.001	-4.05889	no	-	AT3G45140 (E=0.0) LOX2, ATLOX2 | LOX2 (LIPOXYGENASE 2); lipoxygenase	Metabolism	Lipid metabolism	ko00592//alpha-Linolenic acid metabolism;ko00591//Linoleic acid metabolism	K00454	-	GO:0003674//molecular_function;GO:0005488//binding;GO:0003824//catalytic activity;GO:0005515//protein binding	GO:0008152//metabolic process;GO:0009987//cellular process;GO:0044699//single-organism process;GO:0071704//organic substance metabolic process;GO:0009058//biosynthetic process;GO:0044238//primary metabolic process;GO:0044710//single-organism metabolic process;GO:0008150//biological_process;GO:0006629//lipid metabolic process
Bra004064	0.21	1.17333	2.48215	yes	0.53	2.07	1.96557	yes	1.47333	1.23667	-0.252627	no	-	-	-	-	-	-	-	-	-
Bra004066	0.001	0.0833333	6.38082	no	0.0933333	3.69	5.30508	yes	0.143333	0.0566667	-1.3388	no	-	-	-	-	-	-	-	-	-
Bra004075	60.6	6.09667	-3.31323	yes	117.49	8.55333	-3.77991	yes	38.0833	4.69667	-3.01945	yes	-	AT1G67740 (E=5e-053) PSBY, YCF32 | PSBY	Metabolism	Energy metabolism	ko00195//Photosynthesis	K02723	GO:0005622//intracellular;GO:0005623//cell;GO:0044464//cell part;GO:0009579//thylakoid;GO:0005575//cellular_component;GO:0016020//membrane;GO:0044424//intracellular part	GO:0003674//molecular_function;GO:0005488//binding	GO:0008150//biological_process;GO:0008152//metabolic process;GO:0015979//photosynthesis;GO:0009987//cellular process;GO:0044237//cellular metabolic process
Bra004078	4.82333	2.13667	-1.17467	yes	4.07333	2.15333	-0.919638	no	1.36	1.09	-0.319279	no	-	AT1G67690 (E=0.0) | metalloendopeptidase	-	-	-	-	-	GO:0003824//catalytic activity;GO:0016787//hydrolase activity;GO:0005488//binding;GO:0003674//molecular_function	GO:0071704//organic substance metabolic process;GO:0008150//biological_process;GO:0044238//primary metabolic process;GO:0008152//metabolic process;GO:0043170//macromolecule metabolic process;GO:0019538//protein metabolic process
Bra004079	6.53	2.16333	-1.59383	yes	12.5567	2.45	-2.3576	yes	3.11667	1.34333	-1.21419	yes	-	AT1G67680 (E=2e-274) | 7S RNA binding	Genetic Information Processing	Folding, sorting and degradation	ko03060//Protein export	K03108	GO:0005575//cellular_component;GO:0005622//intracellular;GO:0044424//intracellular part;GO:0005623//cell;GO:0044464//cell part;GO:0005737//cytoplasm	GO:0005488//binding;GO:0097159//organic cyclic compound binding;GO:0003676//nucleic acid binding;GO:0003674//molecular_function;GO:1901363//heterocyclic compound binding;GO:0005515//protein binding;GO:0003723//RNA binding	GO:0051234//establishment of localization;GO:0051179//localization;GO:0071840//cellular component organization or biogenesis;GO:0008150//biological_process;GO:0006810//transport;GO:0016043//cellular component organization;GO:0009987//cellular process
Bra004093	0.0933333	0.05	-0.900464	no	18.75	1.21333	-3.94984	yes	0.763333	2.26667	1.57019	yes	-	AT1G67330 (E=4e-140) | unknown protein	-	-	-	-	-	-	GO:0009058//biosynthetic process;GO:0008152//metabolic process;GO:0008150//biological_process;GO:0005975//carbohydrate metabolic process;GO:0044238//primary metabolic process;GO:0071704//organic substance metabolic process;GO:0009987//cellular process
Bra004098	24.5033	32.5667	0.410418	no	29.1533	31.46	0.109858	no	5.17667	16.41	1.66448	yes	-	AT1G67250 (E=2e-068) | proteasome maturation factor UMP1 family protein	Genetic Information Processing	Folding, sorting and degradation	ko03050//Proteasome	K11599	-	-	GO:0009987//cellular process;GO:0016043//cellular component organization;GO:0071840//cellular component organization or biogenesis;GO:0008150//biological_process
Bra004099	0.483333	0.113333	-2.09245	yes	0.336667	0.133333	-1.33628	no	0.001	0.0133333	3.73697	no	-	AT1G67220 (E=8e-259) HAC02, HAC2, ATHPCAT1 | HAC2 (HISTONE ACETYLTRANSFERASE OF THE CBP FAMILY 2); DNA binding / histone acetyltransferase/ transcription cofactor	-	-	-	-	GO:0043226//organelle;GO:0043229//intracellular organelle;GO:0005623//cell;GO:0005634//nucleus;GO:0044424//intracellular part;GO:0043231//intracellular membrane-bounded organelle;GO:0043227//membrane-bounded organelle;GO:0005575//cellular_component;GO:0044464//cell part;GO:0005622//intracellular	GO:0003674//molecular_function;GO:0003824//catalytic activity;GO:0016740//transferase activity;GO:0005515//protein binding;GO:0005488//binding	GO:0008152//metabolic process;GO:1901360//organic cyclic compound metabolic process;GO:0006139//nucleobase-containing compound metabolic process;GO:0008150//biological_process;GO:0043412//macromolecule modification;GO:0009058//biosynthetic process;GO:0071840//cellular component organization or biogenesis;GO:0044260//cellular macromolecule metabolic process;GO:0019538//protein metabolic process;GO…
Bra004106	0.19	6.93333	5.18948	yes	0.17	9.81667	5.85163	yes	0.166667	1.06667	2.67807	no	-	AT1G64750 (E=5e-007) ATDSS1(I) | ATDSS1(I) (ARABIDOPSIS THALIANA DELETION OF SUV3 SUPRESSOR 1(I))	Genetic Information Processing	Replication and repair;Folding, sorting and degradation	ko03440//Homologous recombination;ko03050//Proteasome	K10881	GO:0044464//cell part;GO:0005575//cellular_component;GO:0005622//intracellular;GO:0005623//cell	-	GO:0009987//cellular process;GO:0006810//transport;GO:0051179//localization;GO:0008150//biological_process;GO:0008152//metabolic process;GO:0051234//establishment of localization;GO:0071840//cellular component organization or biogenesis;GO:0016043//cellular component organization
Bra004108	29.85	11.7167	-1.34917	yes	24.8433	13.3067	-0.90071	no	10.2267	8.93333	-0.195065	no	-	-	-	-	-	-	-	-	-
Bra004109	2.07	0.506667	-2.03052	yes	72.14	0.52	-7.11614	yes	5.94667	10.4267	0.810125	no	4CL3	AT1G65060 (E=1e-253) 4CL3 | 4CL3; 4-coumarate-CoA ligase	Metabolism	Metabolism of cofactors and vitamins;Amino acid metabolism;Biosynthesis of other secondary metabolites	ko00940//Phenylpropanoid biosynthesis;ko00130//Ubiquinone and other terpenoid-quinone biosynthesis;ko00360//Phenylalanine metabolism	K01904	-	GO:0003824//catalytic activity;GO:0003674//molecular_function	GO:0048856//anatomical structure development;GO:0008150//biological_process;GO:0044699//single-organism process;GO:0009628//response to abiotic stimulus;GO:0007275//multicellular organism development;GO:0044767//single-organism developmental process;GO:0032502//developmental process;GO:0032501//multicellular organismal process;GO:0071840//cellular component organization or biogenesis;GO:0050896//…
Bra004111	0.32	2.67	3.0607	yes	0.16	1.38	3.10852	yes	0.001	0.001	0	notest	-	AT1G43080 (E=9e-123) | glycoside hydrolase family 28 protein / polygalacturonase (pectinase) family protein	-	-	-	-	GO:0005576//extracellular region;GO:0005575//cellular_component	GO:0003824//catalytic activity;GO:0016787//hydrolase activity;GO:0003674//molecular_function	GO:0008150//biological_process;GO:0071840//cellular component organization or biogenesis;GO:0044238//primary metabolic process;GO:0009987//cellular process;GO:0005975//carbohydrate metabolic process;GO:0016043//cellular component organization;GO:0071704//organic substance metabolic process;GO:0008152//metabolic process
Bra004113	8.80667	20	1.18333	yes	17.48	24.2	0.469302	no	18.62	15.5633	-0.258702	no	-	AT1G65320 (E=7e-199) | CBS domain-containing protein	-	-	-	-	GO:0044464//cell part;GO:0043226//organelle;GO:0043229//intracellular organelle;GO:0043231//intracellular membrane-bounded organelle;GO:0005623//cell;GO:0005575//cellular_component;GO:0044424//intracellular part;GO:0005773//vacuole;GO:0005737//cytoplasm;GO:0043227//membrane-bounded organelle;GO:0044444//cytoplasmic part;GO:0005622//intracellular	GO:1901363//heterocyclic compound binding;GO:0097159//organic cyclic compound binding;GO:0005488//binding;GO:0000166//nucleotide binding;GO:0036094//small molecule binding;GO:0003674//molecular_function;GO:1901265//nucleoside phosphate binding	-
Bra004116	13.4	6.20333	-1.11112	yes	12.9133	9.80333	-0.397517	no	18.03	12.1167	-0.573407	no	FAS1	AT1G65470 (E=1e-257) FAS1, NFB2 | FAS1 (FASCIATA 1); histone binding	-	-	-	-	GO:0005575//cellular_component	-	GO:0008150//biological_process;GO:0071840//cellular component organization or biogenesis;GO:0034641//cellular nitrogen compound metabolic process;GO:0007049//cell cycle;GO:0044763//single-organism cellular process;GO:0044237//cellular metabolic process;GO:0046483//heterocycle metabolic process;GO:0030154//cell differentiation;GO:0048869//cellular developmental process;GO:0044260//cellular macromo…
Bra004117	34.0267	7	-2.28124	yes	53.62	2.19333	-4.61157	yes	1.14667	0.333333	-1.78241	no	-	AT4G20370 (E=2e-085) TSF | TSF (TWIN SISTER OF FT); phosphatidylethanolamine binding	Organismal Systems	Environmental adaptation	ko04712//Circadian rhythm - plant	K16223	-	GO:0008289//lipid binding;GO:0005488//binding;GO:0003674//molecular_function	GO:0090567//reproductive shoot system development;GO:0003006//developmental process involved in reproduction;GO:0022414//reproductive process;GO:0048856//anatomical structure development;GO:0044767//single-organism developmental process;GO:0009791//post-embryonic development;GO:0009628//response to abiotic stimulus;GO:0044699//single-organism process;GO:0048731//system development;GO:0000003//rep…
Bra004121	62.1267	42.5633	-0.545602	no	81.05	70.8233	-0.194587	no	3.14333	0.946667	-1.73137	yes	HEXO3	AT1G65590 (E=6e-265) HEXO3, ATHEX1 | HEXO3 (BETA-HEXOSAMINIDASE 3); beta-N-acetylhexosaminidase/ hexosaminidase	Metabolism	Carbohydrate metabolism;Glycan biosynthesis and metabolism	ko00520//Amino sugar and nucleotide sugar metabolism;ko00511//Other glycan degradation;ko00603//Glycosphingolipid biosynthesis - globo series;ko00531//Glycosaminoglycan degradation;ko00604//Glycosphingolipid biosynthesis - ganglio series	K12373	GO:0071944//cell periphery;GO:0030312//external encapsulating structure;GO:0016020//membrane;GO:0005886//plasma membrane;GO:0005618//cell wall;GO:0005575//cellular_component;GO:0005623//cell;GO:0044464//cell part	GO:0003674//molecular_function;GO:0016787//hydrolase activity;GO:0003824//catalytic activity	GO:0044238//primary metabolic process;GO:0071704//organic substance metabolic process;GO:0008150//biological_process;GO:0005975//carbohydrate metabolic process;GO:0008152//metabolic process
Bra004126	464.637	1147.15	1.30388	yes	372.793	829.33	1.15357	yes	72.5633	146.893	1.01746	yes	-	-	-	-	-	-	-	-	-
Bra004127	17.4767	8.39667	-1.05754	yes	15.34	10.03	-0.612977	no	13.8167	8.74	-0.660704	no	-	AT1G65730 (E=0.0) YSL7 | YSL7 (YELLOW STRIPE LIKE 7); oligopeptide transporter	-	-	-	-	GO:0071944//cell periphery;GO:0005886//plasma membrane;GO:0005575//cellular_component;GO:0016020//membrane;GO:0005623//cell;GO:0044464//cell part	-	GO:0009987//cellular process;GO:0051179//localization;GO:0006810//transport;GO:0051234//establishment of localization;GO:0008150//biological_process
Bra004143	23.5367	5.77333	-2.02743	yes	14.4067	9.97333	-0.530589	no	9.45667	4.15333	-1.18706	no	-	AT1G66070 (E=2e-069) | translation initiation factor-related	Genetic Information Processing	Translation	ko03013//RNA transport	K03245	GO:0005737//cytoplasm;GO:0044424//intracellular part;GO:0005622//intracellular;GO:0044464//cell part;GO:0005575//cellular_component;GO:0005623//cell	GO:0003723//RNA binding;GO:0003676//nucleic acid binding;GO:1901363//heterocyclic compound binding;GO:0003674//molecular_function;GO:0008135//translation factor activity, RNA binding;GO:0097159//organic cyclic compound binding;GO:0005488//binding	GO:0043170//macromolecule metabolic process;GO:0008152//metabolic process;GO:0071840//cellular component organization or biogenesis;GO:0044249//cellular biosynthetic process;GO:0008150//biological_process;GO:0044238//primary metabolic process;GO:0043604//amide biosynthetic process;GO:1901576//organic substance biosynthetic process;GO:0019538//protein metabolic process;GO:0043043//peptide biosynth…
Bra004161	13.34	1.63	-3.03281	yes	2.43333	0.263333	-3.20797	no	0.001	0.001	0	notest	-	AT1G66360 (E=3e-083) | C2 domain-containing protein	-	-	-	-	-	GO:0005488//binding;GO:0005515//protein binding;GO:0003674//molecular_function	GO:0040007//growth;GO:0048856//anatomical structure development;GO:0009653//anatomical structure morphogenesis;GO:0000003//reproduction;GO:0009856//pollination;GO:0044767//single-organism developmental process;GO:0009987//cellular process;GO:0032502//developmental process;GO:0032501//multicellular organismal process;GO:0048869//cellular developmental process;GO:0044706//multi-multicellular organi…
Bra004167	2.92333	4.97333	0.766599	no	6.34333	4.97	-0.351995	no	2.05667	0.536667	-1.93821	yes	-	AT1G66460 (E=1e-113) | protein kinase family protein	-	-	-	-	-	GO:0097159//organic cyclic compound binding;GO:0016772//transferase activity, transferring phosphorus-containing groups;GO:0005488//binding;GO:0003824//catalytic activity;GO:0016301//kinase activity;GO:0003674//molecular_function;GO:0016740//transferase activity;GO:1901265//nucleoside phosphate binding;GO:1901363//heterocyclic compound binding;GO:0036094//small molecule binding;GO:0000166//nucleo…	GO:0071704//organic substance metabolic process;GO:0043170//macromolecule metabolic process;GO:0009987//cellular process;GO:0036211//protein modification process;GO:0043412//macromolecule modification;GO:0008152//metabolic process;GO:0044267//cellular protein metabolic process;GO:0044237//cellular metabolic process;GO:0008150//biological_process;GO:0006464//cellular protein modification process;G…
Bra004170	3.21	9.4	1.55009	yes	22.32	7.88	-1.50207	yes	3.67	2.34	-0.649272	no	-	AT1G66480 (E=8e-090) PMI2 | PMI2 (plastid movement impaired 2)	-	-	-	-	GO:0005623//cell;GO:0071944//cell periphery;GO:0016020//membrane;GO:0044464//cell part;GO:0005886//plasma membrane;GO:0005575//cellular_component	-	GO:0009987//cellular process;GO:0009058//biosynthetic process;GO:0008150//biological_process;GO:0008152//metabolic process
Bra004171	37.18	4.35333	-3.09433	yes	62.8	3.71	-4.08127	yes	26.8	5.4	-2.3112	yes	-	AT1G66500 (E=3e-051) | zinc finger (C2H2-type) family protein	Genetic Information Processing	Translation	ko03015//mRNA surveillance pathway	K14400	-	GO:0005488//binding;GO:0003674//molecular_function	-
Bra004172	19.08	1.77333	-3.42753	yes	7.77	1.82	-2.09398	no	8.14333	0.696667	-3.54708	yes	-	AT1G66510 (E=8e-124) | AAR2 protein family	-	-	-	-	-	-	GO:0009987//cellular process;GO:0050896//response to stimulus;GO:0044238//primary metabolic process;GO:0044763//single-organism cellular process;GO:0044699//single-organism process;GO:0006950//response to stress;GO:0044237//cellular metabolic process;GO:0009628//response to abiotic stimulus;GO:0008150//biological_process;GO:0034641//cellular nitrogen compound metabolic process;GO:0006139//nucleob…
Bra004179	0.34	0.001	-8.40939	yes	0.346667	0.001	-8.43741	yes	32.5467	0.001	-14.9902	yes	-	AT4G21380 (E=5e-176) ARK3 | ARK3 (A. THALIANA RECEPTOR KINASE 3); kinase/ transmembrane receptor protein serine/threonine kinase	-	-	-	-	-	GO:0016740//transferase activity;GO:0003674//molecular_function;GO:0003824//catalytic activity;GO:0016301//kinase activity;GO:0016772//transferase activity, transferring phosphorus-containing groups	GO:0022414//reproductive process;GO:0044706//multi-multicellular organism process;GO:0044699//single-organism process;GO:0000003//reproduction;GO:0009856//pollination;GO:0044763//single-organism cellular process;GO:0009875//pollen-pistil interaction;GO:0044703//multi-organism reproductive process;GO:0009987//cellular process;GO:0032501//multicellular organismal process;GO:0051704//multi-organism …
Bra004180	0.001	0.001	0	notest	0.04	0.001	-5.32193	no	0.623333	0.001	-9.28386	yes	-	AT4G21380 (E=4e-136) ARK3 | ARK3 (A. THALIANA RECEPTOR KINASE 3); kinase/ transmembrane receptor protein serine/threonine kinase	-	-	-	-	-	GO:1901265//nucleoside phosphate binding;GO:0005488//binding;GO:0000166//nucleotide binding;GO:0097159//organic cyclic compound binding;GO:0036094//small molecule binding;GO:0016301//kinase activity;GO:0016772//transferase activity, transferring phosphorus-containing groups;GO:0003824//catalytic activity;GO:0016740//transferase activity;GO:0003674//molecular_function;GO:1901363//heterocyclic comp…	GO:0006464//cellular protein modification process;GO:0044237//cellular metabolic process;GO:0036211//protein modification process;GO:0043412//macromolecule modification;GO:0008152//metabolic process;GO:0044267//cellular protein metabolic process;GO:0044238//primary metabolic process;GO:0019538//protein metabolic process;GO:0043170//macromolecule metabolic process;GO:0071704//organic substance met…
Bra004183	0.343333	3.40667	3.31068	yes	0.426667	1.49	1.80413	no	0.001	0.001	0	notest	-	AT1G66700 (E=5e-160) PXMT1 | PXMT1; S-adenosylmethionine-dependent methyltransferase	-	-	-	-	-	GO:0003824//catalytic activity;GO:0003674//molecular_function;GO:0016740//transferase activity	GO:0008150//biological_process;GO:0008152//metabolic process
Bra004185	3.74	0.001	-11.8688	yes	3.08333	0.06	-5.68338	yes	3.31	0.0366667	-6.49622	yes	AtLIG6	AT1G66730 (E=9e-181) | ATP dependent DNA ligase family protein	Genetic Information Processing	Replication and repair	ko03420//Nucleotide excision repair;ko03030//DNA replication;ko03430//Mismatch repair;ko03410//Base excision repair	K10747	-	GO:1901265//nucleoside phosphate binding;GO:0097159//organic cyclic compound binding;GO:0016787//hydrolase activity;GO:0005488//binding;GO:0036094//small molecule binding;GO:0000166//nucleotide binding;GO:0003674//molecular_function;GO:0003824//catalytic activity;GO:1901363//heterocyclic compound binding	GO:0009987//cellular process;GO:0044260//cellular macromolecule metabolic process;GO:0008152//metabolic process;GO:0046483//heterocycle metabolic process;GO:0044238//primary metabolic process;GO:0044237//cellular metabolic process;GO:0006950//response to stress;GO:0008150//biological_process;GO:0034641//cellular nitrogen compound metabolic process;GO:0006139//nucleobase-containing compound metabo…
Bra004187	4.46667	2.43667	-0.87429	no	8.17	5.12667	-0.672315	no	0.856667	0.31	-1.46647	yes	-	AT1G64820 (E=5e-149) | MATE efflux family protein	-	-	-	-	GO:0016020//membrane;GO:0005575//cellular_component	GO:0005215//transporter activity;GO:0003674//molecular_function	GO:0009987//cellular process;GO:0006810//transport;GO:0051179//localization;GO:0008150//biological_process;GO:0051234//establishment of localization
Bra004188	0.16	0.126667	-0.337035	no	0.363333	0.0266667	-3.76818	no	4.1	0.853333	-2.26444	yes	-	AT1G66760 (E=3e-159) | MATE efflux family protein	-	-	-	-	GO:0016020//membrane;GO:0005575//cellular_component	GO:0003674//molecular_function;GO:0005215//transporter activity	GO:0051234//establishment of localization;GO:0006810//transport;GO:0051179//localization;GO:0009987//cellular process;GO:0008150//biological_process
Bra004190	0.001	1.20333	10.2328	yes	0.19	1.41	2.89162	no	0.001	0.26	8.02237	no	-	-	-	-	-	-	-	-	-
Bra004195	0.001	0.0233333	4.54432	no	0.001	0.04	5.32193	no	0.001	1.60667	10.6499	yes	-	AT1G66880 (E=2e-165) | serine/threonine protein kinase family protein	-	-	-	-	-	GO:0016740//transferase activity;GO:0000166//nucleotide binding;GO:0016772//transferase activity, transferring phosphorus-containing groups;GO:0003674//molecular_function;GO:0003824//catalytic activity;GO:0036094//small molecule binding;GO:1901363//heterocyclic compound binding;GO:0005488//binding;GO:0016301//kinase activity;GO:1901265//nucleoside phosphate binding;GO:0097159//organic cyclic comp…	GO:0043170//macromolecule metabolic process;GO:0071704//organic substance metabolic process;GO:0009987//cellular process;GO:0044267//cellular protein metabolic process;GO:0019538//protein metabolic process;GO:0044238//primary metabolic process;GO:0008150//biological_process;GO:0006464//cellular protein modification process;GO:0036211//protein modification process;GO:0008152//metabolic process;GO:…
Bra004220	1.49667	1.87333	0.323855	no	4.40667	7.20667	0.709644	no	1.61	4.80333	1.57698	yes	-	AT1G67340 (E=2e-176) | zinc finger (MYND type) family protein / F-box family protein	-	-	-	-	-	GO:0003674//molecular_function;GO:0005515//protein binding;GO:0005488//binding	-
Bra004227	0.0333333	0.33	3.30743	no	0.03	0.206667	2.78427	no	5.11667	13.0067	1.34598	yes	-	AT1G67480 (E=4e-183) | kelch repeat-containing F-box family protein	-	-	-	-	-	GO:0005515//protein binding;GO:0003674//molecular_function;GO:0005488//binding	-
Bra004235	3.92	9.96	1.34529	yes	4.45	10.6233	1.25536	yes	1.61	2.27667	0.499862	no	-	-	-	-	-	-	-	-	-
Bra004237	0.44	5.80333	3.72131	yes	2.07667	13.0233	2.64876	yes	0.15	0.426667	1.50815	no	-	-	-	-	-	-	-	-	-
Bra004241	4.89667	0.82	-2.5781	yes	7.31	1.43333	-2.3505	yes	4.17	0.613333	-2.7653	yes	-	AT1G67660 (E=5e-102) | DNA binding / nuclease	-	-	-	-	-	GO:0097159//organic cyclic compound binding;GO:0016787//hydrolase activity;GO:0003677//DNA binding;GO:0004518//nuclease activity;GO:0005488//binding;GO:0003676//nucleic acid binding;GO:0003824//catalytic activity;GO:1901363//heterocyclic compound binding;GO:0016788//hydrolase activity, acting on ester bonds;GO:0003674//molecular_function	GO:1901360//organic cyclic compound metabolic process;GO:0008152//metabolic process;GO:0071704//organic substance metabolic process;GO:0044237//cellular metabolic process;GO:0046483//heterocycle metabolic process;GO:0006807//nitrogen compound metabolic process;GO:0008150//biological_process;GO:0006725//cellular aromatic compound metabolic process;GO:0006139//nucleobase-containing compound metabol…
Bra004246	0.0266667	0.001	-4.73697	no	0.0266667	0.0233333	-0.192645	no	0.56	0.0733333	-2.93289	yes	-	AT1G50990 (E=3e-176) | protein kinase-related	Environmental Information Processing	Signal transduction	ko04075//Plant hormone signal transduction	K14500	-	GO:0097159//organic cyclic compound binding;GO:0003674//molecular_function;GO:0000166//nucleotide binding;GO:0016301//kinase activity;GO:0005515//protein binding;GO:0036094//small molecule binding;GO:0016772//transferase activity, transferring phosphorus-containing groups;GO:0003824//catalytic activity;GO:0016740//transferase activity;GO:0005488//binding;GO:1901265//nucleoside phosphate binding;G…	GO:0006464//cellular protein modification process;GO:0019538//protein metabolic process;GO:0009987//cellular process;GO:0044238//primary metabolic process;GO:0044260//cellular macromolecule metabolic process;GO:0008152//metabolic process;GO:0043170//macromolecule metabolic process;GO:0044267//cellular protein metabolic process;GO:0071704//organic substance metabolic process;GO:0036211//protein mo…
Bra004250	1.33333	1.12667	-0.242977	no	1.94333	1.72	-0.176125	no	2.48	0.556667	-2.15545	yes	-	-	-	-	-	-	-	-	-
Bra004251	73.9	60.81	-0.281266	no	138.963	80.2333	-0.792431	no	129.19	45.5967	-1.50249	yes	-	AT1G67730 (E=4e-164) YBR159, KCR1 | YBR159; ketoreductase/ oxidoreductase	Metabolism	Global and Overview;Lipid metabolism	ko01212//Fatty acid metabolism;ko01040//Biosynthesis of unsaturated fatty acids;ko00062//Fatty acid elongation	K10251	-	GO:0003824//catalytic activity;GO:0003674//molecular_function	GO:0008150//biological_process;GO:0008152//metabolic process
Bra004252	24.4633	19.88	-0.299303	no	60.9133	32.5033	-0.90617	no	11.88	3.45667	-1.78108	yes	-	AT1G67740 (E=1e-047) PSBY, YCF32 | PSBY	Metabolism	Energy metabolism	ko00195//Photosynthesis	K02723	GO:0005623//cell;GO:0005622//intracellular;GO:0005575//cellular_component;GO:0009579//thylakoid;GO:0044424//intracellular part;GO:0044464//cell part;GO:0016020//membrane	GO:0003674//molecular_function;GO:0005488//binding	GO:0015979//photosynthesis;GO:0008152//metabolic process;GO:0008150//biological_process;GO:0044237//cellular metabolic process;GO:0009987//cellular process
Bra004260	15.4767	33.87	1.12991	yes	14.7367	28.3333	0.94309	no	5.26	11.37	1.1121	yes	-	AT1G67800 (E=5e-182) | copine-related	-	-	-	-	-	GO:0005488//binding;GO:0005515//protein binding;GO:0003674//molecular_function	GO:0043412//macromolecule modification;GO:0050789//regulation of biological process;GO:0065007//biological regulation;GO:0044699//single-organism process;GO:0036211//protein modification process;GO:0006464//cellular protein modification process;GO:0044700//single organism signaling;GO:0008150//biological_process;GO:0044267//cellular protein metabolic process;GO:0050896//response to stimulus;GO:00…
Bra004262	24.4033	1.18667	-4.36209	yes	45.0633	0.686667	-6.0362	yes	7.23667	0.196667	-5.2015	yes	-	-	-	-	-	-	-	-	-
Bra004267	4.69667	15.83	1.75295	yes	7.73	14.8233	0.93933	no	4.82667	3.82667	-0.334939	no	-	-	-	-	-	-	-	-	-
Bra004270	30.8567	10.4567	-1.56116	yes	24.8733	11.7833	-1.07785	yes	7.39667	4.12333	-0.843064	no	-	AT1G67950 (E=4e-115) | RNA recognition motif (RRM)-containing protein	-	-	-	-	-	GO:0003676//nucleic acid binding;GO:0000166//nucleotide binding;GO:1901265//nucleoside phosphate binding;GO:0036094//small molecule binding;GO:1901363//heterocyclic compound binding;GO:0005488//binding;GO:0003674//molecular_function;GO:0097159//organic cyclic compound binding	GO:0009856//pollination;GO:0032501//multicellular organismal process;GO:0044706//multi-multicellular organism process;GO:0000003//reproduction;GO:0044707//single-multicellular organism process;GO:0044699//single-organism process;GO:0022414//reproductive process;GO:0008150//biological_process;GO:0044767//single-organism developmental process;GO:0032502//developmental process;GO:0051704//multi-orga…
Bra004271	4.33667	0.643333	-2.75295	yes	4.71333	0.666667	-2.82171	yes	1.28333	0.17	-2.91629	yes	ATNAP3	AT1G67940 (E=2e-127) ATNAP3 | ATNAP3; transporter	-	-	-	-	GO:0005623//cell;GO:0016020//membrane;GO:0005575//cellular_component;GO:0043226//organelle;GO:0043231//intracellular membrane-bounded organelle;GO:0044444//cytoplasmic part;GO:0005622//intracellular;GO:0005773//vacuole;GO:0044424//intracellular part;GO:0005886//plasma membrane;GO:0043229//intracellular organelle;GO:0005737//cytoplasm;GO:0044464//cell part;GO:0071944//cell periphery;GO:0043227//me…	GO:1901363//heterocyclic compound binding;GO:0005488//binding;GO:0003674//molecular_function;GO:0036094//small molecule binding;GO:0016787//hydrolase activity;GO:0005215//transporter activity;GO:0097159//organic cyclic compound binding;GO:1901265//nucleoside phosphate binding;GO:0000166//nucleotide binding;GO:0003824//catalytic activity	GO:0006810//transport;GO:0051179//localization;GO:0051234//establishment of localization;GO:0008150//biological_process
Bra004272	37.2267	13.9133	-1.41987	yes	14.88	7.37667	-1.01233	no	4.92	1.74	-1.49957	yes	-	AT1G67970 (E=1e-136) AT-HSFA8, HSFA8 | AT-HSFA8; DNA binding / transcription factor	-	-	-	-	GO:0043231//intracellular membrane-bounded organelle;GO:0043229//intracellular organelle;GO:0044464//cell part;GO:0005634//nucleus;GO:0043226//organelle;GO:0005622//intracellular;GO:0043227//membrane-bounded organelle;GO:0005623//cell;GO:0044424//intracellular part;GO:0005575//cellular_component	GO:0005488//binding;GO:0001071//nucleic acid binding transcription factor activity;GO:0003700//transcription factor activity, sequence-specific DNA binding;GO:0003674//molecular_function;GO:0097159//organic cyclic compound binding;GO:1901363//heterocyclic compound binding;GO:0003676//nucleic acid binding;GO:0003677//DNA binding	GO:0050896//response to stimulus;GO:0071704//organic substance metabolic process;GO:0008152//metabolic process;GO:0006725//cellular aromatic compound metabolic process;GO:0006139//nucleobase-containing compound metabolic process;GO:1901360//organic cyclic compound metabolic process;GO:0044238//primary metabolic process;GO:0046483//heterocycle metabolic process;GO:0009058//biosynthetic process;GO:…
Bra004274	8.29	2.22	-1.90081	yes	7.23333	2.18333	-1.72813	no	4.56667	1.61333	-1.5011	yes	-	AT1G68000 (E=3e-108) ATPIS1, ATPIS | ATPIS1 (PHOSPHATIDYLINOSITOL SYNTHASE 1); CDP-diacylglycerol-inositol 3-phosphatidyltransferase	Environmental Information Processing;Metabolism	Signal transduction;Carbohydrate metabolism;Lipid metabolism	ko00564//Glycerophospholipid metabolism;ko04070//Phosphatidylinositol signaling system;ko00562//Inositol phosphate metabolism	K00999	GO:0005575//cellular_component;GO:0016020//membrane	GO:0003674//molecular_function;GO:0016740//transferase activity;GO:0003824//catalytic activity	GO:0006629//lipid metabolic process;GO:0044238//primary metabolic process;GO:0008150//biological_process;GO:0071704//organic substance metabolic process;GO:0044699//single-organism process;GO:0008152//metabolic process;GO:0044710//single-organism metabolic process;GO:0009058//biosynthetic process;GO:0009987//cellular process
Bra004275	7.25333	15.2767	1.07461	yes	10.2033	8.47667	-0.267472	no	4.36667	1.58	-1.46661	yes	-	AT1G68010 (E=9e-208) HPR | HPR; glycerate dehydrogenase/ poly(U) binding	Metabolism	Amino acid metabolism;Global and Overview;Carbohydrate metabolism	ko01200//Carbon metabolism;ko00630//Glyoxylate and dicarboxylate metabolism;ko00260//Glycine, serine and threonine metabolism	K15893	-	GO:0005488//binding;GO:0097159//organic cyclic compound binding;GO:0003824//catalytic activity;GO:0000166//nucleotide binding;GO:0003674//molecular_function;GO:0036094//small molecule binding;GO:1901265//nucleoside phosphate binding;GO:1901363//heterocyclic compound binding	GO:0008152//metabolic process;GO:0008150//biological_process
Bra004284	27.8767	6.68667	-2.0597	yes	29.44	8.84333	-1.73512	yes	24.43	8.53333	-1.51747	yes	-	-	-	-	-	-	-	-	-
Bra004296	9.64333	3.3	-1.54707	yes	9.09333	4.54333	-1.00106	no	5.17333	3.01333	-0.779734	no	-	-	-	-	-	-	-	-	-
Bra004299	4.9	0.001	-12.2586	yes	3.03	0.001	-11.5651	yes	2.00333	0.001	-10.9682	yes	-	-	-	-	-	-	-	-	-
Bra004310	117.52	24.0033	-2.2916	yes	77.8567	20.1667	-1.94885	yes	24.22	4.58333	-2.40173	yes	-	-	-	-	-	-	-	-	-
Bra004316	2.76667	0.783333	-1.82045	yes	4.06333	2.01	-1.01547	no	0.001	0.0366667	5.1964	no	-	AT1G68540 (E=1e-171) | oxidoreductase family protein	-	-	-	-	-	GO:0005488//binding;GO:0003674//molecular_function;GO:0003824//catalytic activity	GO:0009987//cellular process;GO:0008152//metabolic process;GO:0008150//biological_process
Bra004318	2.85	5.75667	1.01427	no	2.3	6.36667	1.4689	no	3.48	10.5833	1.60463	yes	-	AT1G68550 (E=2e-057) | AP2 domain-containing transcription factor, putative	-	-	-	-	GO:0043227//membrane-bounded organelle;GO:0005575//cellular_component;GO:0005634//nucleus;GO:0043231//intracellular membrane-bounded organelle;GO:0005623//cell;GO:0044464//cell part;GO:0043229//intracellular organelle;GO:0044424//intracellular part;GO:0005622//intracellular;GO:0043226//organelle	GO:0003674//molecular_function;GO:0097159//organic cyclic compound binding;GO:0003677//DNA binding;GO:1901363//heterocyclic compound binding;GO:0003676//nucleic acid binding;GO:0001071//nucleic acid binding transcription factor activity;GO:0005488//binding;GO:0003700//transcription factor activity, sequence-specific DNA binding	GO:0009058//biosynthetic process;GO:0008152//metabolic process;GO:0009987//cellular process;GO:0046483//heterocycle metabolic process;GO:0006139//nucleobase-containing compound metabolic process;GO:0006807//nitrogen compound metabolic process;GO:1901360//organic cyclic compound metabolic process;GO:0044237//cellular metabolic process;GO:0044238//primary metabolic process;GO:0071704//organic subst…
Bra004319	8.93	5.83333	-0.61434	no	52.2967	6.02	-3.11888	yes	41.2533	0.72	-5.84037	yes	-	AT1G68560 (E=0.0) ATXYL1, XYL1 | XYL1 (ALPHA-XYLOSIDASE 1); alpha-N-arabinofuranosidase/ hydrolase, hydrolyzing O-glycosyl compounds / xylan 1,4-beta-xylosidase	-	-	-	-	-	GO:0003674//molecular_function;GO:0030246//carbohydrate binding;GO:0003824//catalytic activity;GO:0005488//binding;GO:0016787//hydrolase activity	GO:0008152//metabolic process;GO:0005975//carbohydrate metabolic process;GO:0071704//organic substance metabolic process;GO:0008150//biological_process;GO:0044238//primary metabolic process
Bra004323	23.8267	27.5267	0.208253	no	18.7467	26.7033	0.510386	no	2.83	0.33	-3.10026	yes	-	AT1G68590 (E=1e-067) | plastid-specific 30S ribosomal protein 3, putative / PSRP-3, putative	-	-	-	-	GO:0005840//ribosome;GO:0044464//cell part;GO:0005622//intracellular;GO:0030529//intracellular ribonucleoprotein complex;GO:0005575//cellular_component;GO:0005737//cytoplasm;GO:0043232//intracellular non-membrane-bounded organelle;GO:0044424//intracellular part;GO:0032991//macromolecular complex;GO:0043229//intracellular organelle;GO:1990904//ribonucleoprotein complex;GO:0044444//cytoplasmic part…	GO:0003674//molecular_function;GO:0005198//structural molecule activity	GO:0043043//peptide biosynthetic process;GO:0006518//peptide metabolic process;GO:0044249//cellular biosynthetic process;GO:0044260//cellular macromolecule metabolic process;GO:0019538//protein metabolic process;GO:0006412//translation;GO:0034641//cellular nitrogen compound metabolic process;GO:0044267//cellular protein metabolic process;GO:0010467//gene expression;GO:0009987//cellular process;GO…
Bra004330	7.63667	5.32	-0.521517	no	6.17	2.28333	-1.43413	no	2.96	0.343333	-3.10792	yes	-	AT1G68670 (E=1e-087) | myb family transcription factor	-	-	-	-	-	GO:0003676//nucleic acid binding;GO:1901363//heterocyclic compound binding;GO:0003682//chromatin binding;GO:0097159//organic cyclic compound binding;GO:0044877//macromolecular complex binding;GO:0005488//binding;GO:0003674//molecular_function;GO:0003677//DNA binding	-
Bra004331	9.59	5.02	-0.933843	no	2.81	2.43333	-0.207636	no	2.35	0.6	-1.96963	yes	-	AT1G68690 (E=7e-207) | ATP binding / protein kinase/ protein serine/threonine kinase	-	-	-	-	-	GO:0016301//kinase activity;GO:0097159//organic cyclic compound binding;GO:1901363//heterocyclic compound binding;GO:0036094//small molecule binding;GO:0003824//catalytic activity;GO:0016740//transferase activity;GO:0003674//molecular_function;GO:0005488//binding;GO:0000166//nucleotide binding;GO:1901265//nucleoside phosphate binding;GO:0016772//transferase activity, transferring phosphorus-conta…	GO:0019538//protein metabolic process;GO:0044238//primary metabolic process;GO:0044267//cellular protein metabolic process;GO:0006464//cellular protein modification process;GO:0009987//cellular process;GO:0008150//biological_process;GO:0043412//macromolecule modification;GO:0044260//cellular macromolecule metabolic process;GO:0008152//metabolic process;GO:0071704//organic substance metabolic proc…
Bra004332	0.833333	2.84333	1.77062	yes	2.54333	2.71667	0.095117	no	0.403333	0.2	-1.01197	no	-	AT1G68710 (E=0.0) | haloacid dehalogenase-like hydrolase family protein	-	-	-	-	GO:0005575//cellular_component;GO:0016020//membrane	GO:0016787//hydrolase activity;GO:0097159//organic cyclic compound binding;GO:0005215//transporter activity;GO:1901363//heterocyclic compound binding;GO:0005488//binding;GO:1901265//nucleoside phosphate binding;GO:0036094//small molecule binding;GO:0003674//molecular_function;GO:0003824//catalytic activity;GO:0000166//nucleotide binding	GO:0006810//transport;GO:0051179//localization;GO:0051234//establishment of localization;GO:0008150//biological_process;GO:0071840//cellular component organization or biogenesis;GO:0009987//cellular process;GO:0016043//cellular component organization
Bra004333	24.0633	2.38667	-3.33377	yes	155.72	6.59	-4.56253	yes	1.13	0.363333	-1.63696	no	-	AT1G68730 (E=6e-053) | zinc finger (DNL type) family protein	-	-	-	-	-	GO:0005488//binding;GO:0003674//molecular_function	-
Bra004336	0.001	0.03	4.90689	no	0.133333	0.3	1.16993	no	1.23	3.44	1.48375	yes	-	AT1G68780 (E=1e-199) | leucine-rich repeat family protein	-	-	-	-	-	-	GO:0023052//signaling;GO:0009791//post-embryonic development;GO:0065007//biological regulation;GO:0048731//system development;GO:0007154//cell communication;GO:0044763//single-organism cellular process;GO:0000003//reproduction;GO:0048367//shoot system development;GO:0044700//single organism signaling;GO:0050789//regulation of biological process;GO:0051716//cellular response to stimulus;GO:0048856…
Bra004343	0.04	0.683333	4.09452	yes	0.703333	0.28	-1.32878	no	4.53	10.4433	1.205	no	-	AT1G68850 (E=9e-183) | peroxidase, putative	Metabolism	Biosynthesis of other secondary metabolites	ko00940//Phenylpropanoid biosynthesis	K00430	GO:0005576//extracellular region;GO:0005575//cellular_component	GO:0005488//binding;GO:0003674//molecular_function;GO:0003824//catalytic activity	GO:0008150//biological_process;GO:0050896//response to stimulus;GO:0008152//metabolic process;GO:0006950//response to stress
Bra004348	10.6367	20.7167	0.961746	no	8.29667	20.8233	1.3276	yes	5.42333	16.19	1.57785	yes	-	AT1G68920 (E=1e-163) | basic helix-loop-helix (bHLH) family protein	-	-	-	-	-	GO:0005515//protein binding;GO:0005488//binding;GO:0003674//molecular_function	-
Bra004356	1.13333	2.52	1.15285	yes	1.27333	3.97	1.64053	yes	1.84	3.77	1.03486	yes	-	AT1G69020 (E=1e-144) | prolyl oligopeptidase family protein	-	-	-	-	GO:0009536//plastid;GO:0044424//intracellular part;GO:0043227//membrane-bounded organelle;GO:0043231//intracellular membrane-bounded organelle;GO:0005623//cell;GO:0005622//intracellular;GO:0044464//cell part;GO:0005737//cytoplasm;GO:0043226//organelle;GO:0005575//cellular_component;GO:0044444//cytoplasmic part;GO:0043229//intracellular organelle	GO:0003674//molecular_function;GO:0005488//binding;GO:0005515//protein binding;GO:0003824//catalytic activity;GO:0016787//hydrolase activity	GO:0019538//protein metabolic process;GO:0044238//primary metabolic process;GO:0071704//organic substance metabolic process;GO:0043170//macromolecule metabolic process;GO:0008150//biological_process;GO:0008152//metabolic process
Bra004359	15.98	9.30333	-0.780448	no	21.21	14.35	-0.563694	no	10.43	3.76333	-1.47066	yes	-	AT1G69060 (E=1e-042) | heat shock protein binding	-	-	-	-	GO:0016020//membrane;GO:0005575//cellular_component;GO:0044424//intracellular part;GO:0043227//membrane-bounded organelle;GO:0005623//cell;GO:0005622//intracellular;GO:0043231//intracellular membrane-bounded organelle;GO:0044464//cell part;GO:0043229//intracellular organelle;GO:0005773//vacuole;GO:0044444//cytoplasmic part;GO:0043226//organelle;GO:0005737//cytoplasm	-	-
Bra004362	0.166667	0.001	-7.38082	no	0.683333	0.001	-9.41645	yes	1.09	0.586667	-0.893715	no	-	-	-	-	-	-	-	-	-
Bra004363	2.17667	0.403333	-2.43208	yes	2.35667	0.356667	-2.7241	yes	1.07667	0.08	-3.75043	yes	-	AT1G69170 (E=7e-043) | squamosa promoter-binding protein-like 6 (SPL6)	-	-	-	-	GO:0005622//intracellular;GO:0005634//nucleus;GO:0044424//intracellular part;GO:0005575//cellular_component;GO:0005623//cell;GO:0043226//organelle;GO:0043231//intracellular membrane-bounded organelle;GO:0044464//cell part;GO:0043227//membrane-bounded organelle;GO:0043229//intracellular organelle	GO:0003677//DNA binding;GO:0003674//molecular_function;GO:0097159//organic cyclic compound binding;GO:0003676//nucleic acid binding;GO:0005488//binding;GO:1901363//heterocyclic compound binding	-
Bra004365	3.97333	6.13333	0.626322	no	3.92333	13.43	1.77531	yes	7.71667	9.78	0.341857	no	FLN2	AT1G69200 (E=4e-258) | kinase	-	-	-	-	GO:0005623//cell;GO:0043229//intracellular organelle;GO:0044424//intracellular part;GO:0044444//cytoplasmic part;GO:0005575//cellular_component;GO:0005622//intracellular;GO:0043226//organelle;GO:0005737//cytoplasm;GO:0043231//intracellular membrane-bounded organelle;GO:0009536//plastid;GO:0043227//membrane-bounded organelle;GO:0044464//cell part	-	GO:0034641//cellular nitrogen compound metabolic process;GO:1901360//organic cyclic compound metabolic process;GO:0071840//cellular component organization or biogenesis;GO:0009058//biosynthetic process;GO:0046483//heterocycle metabolic process;GO:0006807//nitrogen compound metabolic process;GO:0008152//metabolic process;GO:0071704//organic substance metabolic process;GO:0008150//biological_proces…
Bra004376	4.87667	0.001	-12.2517	yes	6.3	0.173333	-5.18373	yes	1.76667	0.04	-5.46489	yes	-	AT1G69370 (E=5e-106) CM3, cm-3 | CM3 (chorismate mutase 3); chorismate mutase	Metabolism	Amino acid metabolism;Global and Overview	ko01230//Biosynthesis of amino acids;ko00400//Phenylalanine, tyrosine and tryptophan biosynthesis	K01850	-	GO:0003674//molecular_function;GO:0003824//catalytic activity	GO:0008150//biological_process;GO:0009058//biosynthetic process;GO:0009987//cellular process;GO:0008152//metabolic process
Bra004377	3.45333	5.03333	0.543525	no	3.25333	7.46333	1.1979	no	1.25667	3.98333	1.66437	yes	-	-	-	-	-	-	-	-	-
Bra004378	15.0933	27.36	0.858157	no	13.1367	23.14	0.81679	no	4.76667	12.3233	1.37034	yes	-	AT1G69390 (E=5e-098) ATMINE1 | ATMINE1 (Arabidopsis homologue of bacterial MinE 1); protein binding	-	-	-	-	-	-	GO:0008150//biological_process;GO:0016043//cellular component organization;GO:0009987//cellular process;GO:0071840//cellular component organization or biogenesis;GO:0044699//single-organism process;GO:0044763//single-organism cellular process;GO:0007049//cell cycle
Bra004379	7.01667	12.3967	0.821095	no	15.1233	18.9233	0.32339	no	13.1067	44.3133	1.75744	yes	ATELF5A-3	AT1G69410 (E=2e-086) ATELF5A-3, ELF5A-3 | ELF5A-3 (EUKARYOTIC ELONGATION FACTOR 5A-3); translation initiation factor	-	-	-	-	-	GO:0003723//RNA binding;GO:0003674//molecular_function;GO:0008135//translation factor activity, RNA binding;GO:0097159//organic cyclic compound binding;GO:1901363//heterocyclic compound binding;GO:0005488//binding;GO:0003676//nucleic acid binding	GO:0009059//macromolecule biosynthetic process;GO:1901566//organonitrogen compound biosynthetic process;GO:0043604//amide biosynthetic process;GO:0008152//metabolic process;GO:0006412//translation;GO:0006464//cellular protein modification process;GO:0044237//cellular metabolic process;GO:0044238//primary metabolic process;GO:0044249//cellular biosynthetic process;GO:0044271//cellular nitrogen com…
Bra004385	4.28667	20.0733	2.22735	yes	4.79333	5.66333	0.240622	no	0.5	0.216667	-1.20645	no	-	AT1G69490 (E=1e-130) NAP, ANAC029, ATNAP | NAP (NAC-like, activated by AP3/PI); transcription factor	-	-	-	-	GO:0043226//organelle;GO:0043229//intracellular organelle;GO:0043231//intracellular membrane-bounded organelle;GO:0043227//membrane-bounded organelle;GO:0005634//nucleus;GO:0044424//intracellular part;GO:0044464//cell part;GO:0005622//intracellular;GO:0005623//cell;GO:0005575//cellular_component	GO:0097159//organic cyclic compound binding;GO:0005488//binding;GO:1901363//heterocyclic compound binding;GO:0003674//molecular_function;GO:0003677//DNA binding;GO:0003676//nucleic acid binding	GO:0034641//cellular nitrogen compound metabolic process;GO:0044238//primary metabolic process;GO:0008152//metabolic process;GO:0046483//heterocycle metabolic process;GO:0009058//biosynthetic process;GO:0009987//cellular process;GO:0006725//cellular aromatic compound metabolic process;GO:1901360//organic cyclic compound metabolic process;GO:0008150//biological_process;GO:0006807//nitrogen compoun…
Bra004389	1.05	3.70667	1.81973	yes	16.1067	28.4933	0.822966	no	13.92	8.07	-0.786519	no	-	AT1G69523 (E=2e-103) | UbiE/COQ5 methyltransferase family protein	-	-	-	-	-	GO:0003824//catalytic activity;GO:0003674//molecular_function;GO:0016740//transferase activity	GO:0008152//metabolic process;GO:0008150//biological_process
Bra004435	2.64667	2.51667	-0.0726624	no	2.4	1.95	-0.29956	no	60.9467	26.8767	-1.18119	yes	-	AT2G47710 (E=1e-079) | universal stress protein (USP) family protein	-	-	-	-	-	-	GO:0006950//response to stress;GO:0050896//response to stimulus;GO:0008150//biological_process
Bra004439	0.06	0.001	-5.90689	no	21.2367	1.98667	-3.41814	yes	5.22	4.29333	-0.281952	no	-	AT2G47670 (E=3e-063) | invertase/pectin methylesterase inhibitor family protein	-	-	-	-	-	GO:0016787//hydrolase activity;GO:0030234//enzyme regulator activity;GO:0003674//molecular_function;GO:0003824//catalytic activity;GO:0098772//molecular function regulator	GO:0008150//biological_process
Bra004451	3.63333	2.96	-0.295697	no	2.54667	2.65	0.0573822	no	0.88	0.163333	-2.42968	yes	-	AT2G47500 (E=3e-239) | ATP binding / microtubule motor	-	-	-	-	GO:0043232//intracellular non-membrane-bounded organelle;GO:0044424//intracellular part;GO:0005856//cytoskeleton;GO:0005623//cell;GO:0043229//intracellular organelle;GO:0005575//cellular_component;GO:0043228//non-membrane-bounded organelle;GO:0044464//cell part;GO:0043226//organelle;GO:0005622//intracellular	GO:0003774//motor activity;GO:0000166//nucleotide binding;GO:0003824//catalytic activity;GO:0005488//binding;GO:0005515//protein binding;GO:0016787//hydrolase activity;GO:0016817//hydrolase activity, acting on acid anhydrides;GO:0003674//molecular_function;GO:1901363//heterocyclic compound binding;GO:0036094//small molecule binding;GO:0016818//hydrolase activity, acting on acid anhydrides, in pho…	GO:0009987//cellular process;GO:0008150//biological_process
Bra004466	3.98333	1.98	-1.00848	no	1.45	0.803333	-0.851982	no	9.18333	2.79	-1.71875	yes	-	AT2G47260 (E=8e-101) WRKY23, ATWRKY23 | WRKY23; transcription factor	-	-	-	-	-	GO:1901363//heterocyclic compound binding;GO:0097159//organic cyclic compound binding;GO:0003677//DNA binding;GO:0001071//nucleic acid binding transcription factor activity;GO:0003674//molecular_function;GO:0003676//nucleic acid binding;GO:0003700//transcription factor activity, sequence-specific DNA binding;GO:0005488//binding	GO:0009058//biosynthetic process;GO:0071704//organic substance metabolic process;GO:0034641//cellular nitrogen compound metabolic process;GO:0008152//metabolic process;GO:0006807//nitrogen compound metabolic process;GO:0046483//heterocycle metabolic process;GO:1901360//organic cyclic compound metabolic process;GO:0006139//nucleobase-containing compound metabolic process;GO:0006725//cellular aroma…
Bra004484	0.136667	0.0266667	-2.35755	no	0.13	0.001	-7.02237	yes	0.0666667	0.01	-2.73697	no	-	AT2G47000 (E=0.0) MDR4, PGP4, ABCB4, ATPGP4 | ABCB4 (ATP BINDING CASSETTE SUBFAMILY B4); ATPase, coupled to transmembrane movement of substances / xenobiotic-transporting ATPase	Environmental Information Processing	Membrane transport	ko02010//ABC transporters	K05658	GO:0016020//membrane;GO:0005575//cellular_component	GO:0005215//transporter activity;GO:1901265//nucleoside phosphate binding;GO:0016787//hydrolase activity;GO:0036094//small molecule binding;GO:0003674//molecular_function;GO:1901363//heterocyclic compound binding;GO:0005488//binding;GO:0000166//nucleotide binding;GO:0003824//catalytic activity;GO:0097159//organic cyclic compound binding	GO:0051234//establishment of localization;GO:0051179//localization;GO:0008150//biological_process;GO:0009987//cellular process;GO:0006810//transport
Bra004488	0.13	2.1	4.01381	yes	0.183333	3.06667	4.06413	yes	0.001	0.001	0	notest	-	AT3G60960 (E=1e-065) | pentatricopeptide (PPR) repeat-containing protein	-	-	-	-	-	GO:0005515//protein binding;GO:0005488//binding;GO:0003674//molecular_function	-
Bra004497	5.08333	1.66667	-1.60881	no	2.67667	1.9	-0.494438	no	5.22333	1.39333	-1.90643	yes	-	AT2G46910 (E=6e-093) | plastid-lipid associated protein PAP / fibrillin family protein	-	-	-	-	GO:0009536//plastid;GO:0043229//intracellular organelle;GO:0044464//cell part;GO:0043226//organelle;GO:0005623//cell;GO:0005575//cellular_component;GO:0005622//intracellular;GO:0044424//intracellular part;GO:0043227//membrane-bounded organelle;GO:0043231//intracellular membrane-bounded organelle;GO:0005737//cytoplasm;GO:0044444//cytoplasmic part	GO:0003674//molecular_function;GO:0005198//structural molecule activity	-
Bra004499	2.46667	7.88333	1.67624	yes	16.6633	10.4067	-0.679169	no	2.59	2.38333	-0.119971	no	-	AT2G46890 (E=2e-170) | oxidoreductase, acting on the CH-CH group of donors	-	-	-	-	GO:0044424//intracellular part;GO:0005623//cell;GO:0016020//membrane;GO:0005575//cellular_component;GO:0005622//intracellular;GO:0005737//cytoplasm;GO:0044464//cell part	GO:0003824//catalytic activity;GO:0003674//molecular_function	GO:0044238//primary metabolic process;GO:0006629//lipid metabolic process;GO:0008152//metabolic process;GO:0044710//single-organism metabolic process;GO:0008150//biological_process;GO:0071704//organic substance metabolic process;GO:0044699//single-organism process
Bra004502	0.67	0.001	-9.38802	yes	0.32	2.43667	2.92877	no	0.001	0.001	0	notest	-	AT2G46860 (E=2e-111) AtPPa3 | AtPPa3 (Arabidopsis thaliana pyrophosphorylase 3); inorganic diphosphatase/ pyrophosphatase	Metabolism	Energy metabolism	ko00190//Oxidative phosphorylation	K01507	GO:0044424//intracellular part;GO:0005575//cellular_component;GO:0005737//cytoplasm;GO:0005622//intracellular;GO:0005623//cell;GO:0044464//cell part	GO:0003674//molecular_function;GO:0003824//catalytic activity;GO:0005488//binding;GO:0016787//hydrolase activity	GO:0008152//metabolic process;GO:0008150//biological_process;GO:0009987//cellular process
Bra004503	20.82	3.65667	-2.50937	yes	16.6967	12.5433	-0.412639	no	3.29333	1.86	-0.824246	no	CCA1	AT2G46830 (E=2e-117) CCA1 | CCA1 (CIRCADIAN CLOCK ASSOCIATED 1); DNA binding / transcription activator/ transcription factor/ transcription repressor	Organismal Systems	Environmental adaptation	ko04712//Circadian rhythm - plant	K12133	GO:0044464//cell part;GO:0005623//cell;GO:0005634//nucleus;GO:0043226//organelle;GO:0043227//membrane-bounded organelle;GO:0043229//intracellular organelle;GO:0005575//cellular_component;GO:0005622//intracellular;GO:0043231//intracellular membrane-bounded organelle;GO:0044424//intracellular part	GO:0003674//molecular_function;GO:0003682//chromatin binding;GO:0003677//DNA binding;GO:0005488//binding;GO:0003676//nucleic acid binding;GO:1901363//heterocyclic compound binding;GO:0097159//organic cyclic compound binding;GO:0003700//transcription factor activity, sequence-specific DNA binding;GO:0001071//nucleic acid binding transcription factor activity;GO:0044877//macromolecular complex bind…	GO:0006725//cellular aromatic compound metabolic process;GO:0009987//cellular process;GO:0044707//single-multicellular organism process;GO:0032501//multicellular organismal process;GO:0006807//nitrogen compound metabolic process;GO:1901360//organic cyclic compound metabolic process;GO:0044699//single-organism process;GO:0007275//multicellular organism development;GO:0032502//developmental process…
Bra004507	25.0233	2.21333	-3.49898	yes	20.85	4.63	-2.17096	yes	18.99	2.74	-2.79299	yes	-	AT2G46790 (E=1e-085) APRR9, PRR9, TL1 | APRR9 (ARABIDOPSIS PSEUDO-RESPONSE REGULATOR 9); protein binding / transcription regulator/ two-component response regulator	Organismal Systems	Environmental adaptation	ko04712//Circadian rhythm - plant	K12128	-	GO:0004871//signal transducer activity;GO:0003677//DNA binding;GO:0097159//organic cyclic compound binding;GO:0005488//binding;GO:0003674//molecular_function;GO:0003676//nucleic acid binding;GO:0005515//protein binding;GO:1901363//heterocyclic compound binding	GO:1901360//organic cyclic compound metabolic process;GO:0006807//nitrogen compound metabolic process;GO:0044763//single-organism cellular process;GO:0007154//cell communication;GO:0051716//cellular response to stimulus;GO:0071704//organic substance metabolic process;GO:0044699//single-organism process;GO:0006139//nucleobase-containing compound metabolic process;GO:0007165//signal transduction;GO…
Bra004517	5.92667	8.73	0.558761	no	3.65	5.51	0.594156	no	1.61	6.80667	2.07989	yes	-	AT2G46660 (E=1e-273) CYP78A6 | CYP78A6; electron carrier/ heme binding / iron ion binding / monooxygenase/ oxygen binding	-	-	-	-	-	GO:0003674//molecular_function;GO:0005488//binding;GO:0003824//catalytic activity	GO:0008150//biological_process;GO:0008152//metabolic process
Bra004518	10.8567	0.59	-4.20172	yes	61.0233	0.403333	-7.24124	yes	0.263333	0.001	-8.04075	no	-	AT2G46650 (E=3e-058) B5 #1, ATCB5-C, CB5-C | CB5-C (CYTOCHROME B5 ISOFORM C); heme binding	-	-	-	-	-	GO:0005488//binding;GO:0003674//molecular_function	-
Bra004527	58.2233	41.15	-0.500705	no	127.937	60.2567	-1.08624	yes	71.4233	36.2333	-0.979078	no	-	-	-	-	-	-	-	-	-
Bra004530	0.83	3.03667	1.87131	yes	11.03	17.6067	0.674689	no	11.47	8.27333	-0.471325	no	ARF11	AT2G46530 (E=4e-271) ARF11 | ARF11 (AUXIN RESPONSE FACTOR 11); transcription factor	-	-	-	-	GO:0044424//intracellular part;GO:0005622//intracellular;GO:0043229//intracellular organelle;GO:0043226//organelle;GO:0043231//intracellular membrane-bounded organelle;GO:0044464//cell part;GO:0005634//nucleus;GO:0005623//cell;GO:0005575//cellular_component;GO:0043227//membrane-bounded organelle	GO:0001071//nucleic acid binding transcription factor activity;GO:0003677//DNA binding;GO:0003676//nucleic acid binding;GO:0097159//organic cyclic compound binding;GO:0003700//transcription factor activity, sequence-specific DNA binding;GO:1901363//heterocyclic compound binding;GO:0003674//molecular_function;GO:0005488//binding;GO:0005515//protein binding	GO:0007165//signal transduction;GO:0050896//response to stimulus;GO:0009987//cellular process;GO:0044699//single-organism process;GO:0044238//primary metabolic process;GO:0009058//biosynthetic process;GO:0008152//metabolic process;GO:0008150//biological_process;GO:0044237//cellular metabolic process;GO:0006807//nitrogen compound metabolic process;GO:0023052//signaling;GO:0006725//cellular aromati…
Bra004538	13.71	15.4	0.167702	no	13.5967	31.5933	1.21637	yes	12.6433	10.7267	-0.237175	no	-	-	-	-	-	-	-	-	-
Bra004541	7.18667	0.986667	-2.86469	yes	4.97333	1.51	-1.71966	yes	1.46	0.001	-10.5118	yes	-	-	-	-	-	-	-	-	-
Bra004552	1.77667	0.6	-1.56614	yes	0.546667	0.68	0.314873	no	1.46333	2.16333	0.563998	no	-	AT2G46250 (E=2e-103) | myosin heavy chain-related	-	-	-	-	-	-	GO:0006725//cellular aromatic compound metabolic process;GO:0008152//metabolic process;GO:0044237//cellular metabolic process;GO:0046483//heterocycle metabolic process;GO:0009987//cellular process;GO:0071704//organic substance metabolic process;GO:0034641//cellular nitrogen compound metabolic process;GO:0006807//nitrogen compound metabolic process;GO:0044238//primary metabolic process;GO:0006139/…
Bra004558	3.42333	0.29	-3.56128	yes	3.26333	0.0666667	-5.61324	yes	1.56667	0.001	-10.6135	yes	-	-	-	-	-	-	-	-	-
Bra004560	2.18333	21.0133	3.2667	yes	11.75	20.13	0.776686	no	6.48	8.43333	0.380109	no	-	AT2G46210 (E=5e-261) | delta-8 sphingolipid desaturase, putative	-	-	-	-	GO:0043227//membrane-bounded organelle;GO:0044444//cytoplasmic part;GO:0044424//intracellular part;GO:0005623//cell;GO:0043226//organelle;GO:0005622//intracellular;GO:0016020//membrane;GO:0043231//intracellular membrane-bounded organelle;GO:0005575//cellular_component;GO:0005737//cytoplasm;GO:0005783//endoplasmic reticulum;GO:0043229//intracellular organelle;GO:0012505//endomembrane system;GO:004…	GO:0005488//binding;GO:0003824//catalytic activity;GO:0003674//molecular_function	GO:0009987//cellular process;GO:0009058//biosynthetic process;GO:0008150//biological_process;GO:0044699//single-organism process;GO:0008152//metabolic process;GO:0050896//response to stimulus;GO:0044710//single-organism metabolic process;GO:0071704//organic substance metabolic process;GO:0006950//response to stress;GO:0044238//primary metabolic process;GO:0009628//response to abiotic stimulus;GO:…
Bra004564	60.2833	20.0167	-1.59056	yes	51.8367	12.3767	-2.06635	yes	3.19667	0.35	-3.19114	yes	-	AT2G46150 (E=3e-077) | FUNCTIONS IN: molecular_function unknown; INVOLVED IN: biological_process unknown; LOCATED IN: plasma membrane; EXPRESSED IN: 15 plant structures; EXPRESSED DURING: 7 growth stages; CONTAINS InterPro DOMAIN/s: Harpin-induced 1 (InterPro:IPR010847); BEST Arabidopsis thaliana protein match is: unknown protein (TAIR:AT3G54200.1); Has 137 Blast hits to 136 proteins in 12 specie…	-	-	-	-	GO:0005575//cellular_component;GO:0005886//plasma membrane;GO:0005623//cell;GO:0016020//membrane;GO:0071944//cell periphery;GO:0044464//cell part	-	-
Bra004565	10.98	2.65667	-2.04719	yes	3.15333	1.14333	-1.46363	no	0.0733333	0.166667	1.18442	no	-	AT2G46140 (E=8e-082) | late embryogenesis abundant protein, putative / LEA protein, putative	-	-	-	-	-	-	GO:0006950//response to stress;GO:0009628//response to abiotic stimulus;GO:0050896//response to stimulus;GO:0008150//biological_process
Bra004571	6.16667	0.843333	-2.87032	yes	10.3833	0.363333	-4.83683	yes	3.72	1.53333	-1.27863	yes	-	AT2G40460 (E=1e-187) | proton-dependent oligopeptide transport (POT) family protein	-	-	-	-	GO:0005575//cellular_component;GO:0016020//membrane	GO:0003674//molecular_function;GO:0005215//transporter activity	GO:0006810//transport;GO:0051179//localization;GO:0008150//biological_process;GO:0051234//establishment of localization
Bra004574	0.001	0.04	5.32193	no	0.0466667	0.001	-5.54432	no	0.543333	0.001	-9.08569	yes	-	AT2G40490 (E=5e-132) HEME2 | HEME2; uroporphyrinogen decarboxylase	Metabolism	Metabolism of cofactors and vitamins	ko00860//Porphyrin and chlorophyll metabolism	K01599	-	GO:0003824//catalytic activity;GO:0003674//molecular_function	GO:0008150//biological_process;GO:0009058//biosynthetic process;GO:0009987//cellular process;GO:0008152//metabolic process
Bra004590	148.027	73.1033	-1.01785	yes	66.16	55.96	-0.241563	no	21.62	17.8067	-0.279949	no	DPE2	AT2G40840 (E=0.0) DPE2 | DPE2 (DISPROPORTIONATING ENZYME 2); 4-alpha-glucanotransferase/ heteroglycan binding	Metabolism	Carbohydrate metabolism	ko00500//Starch and sucrose metabolism	K00705	GO:0005623//cell;GO:0044444//cytoplasmic part;GO:0044464//cell part;GO:0005575//cellular_component;GO:0005829//cytosol;GO:0044424//intracellular part;GO:0005622//intracellular;GO:0005737//cytoplasm	GO:0005488//binding;GO:0030246//carbohydrate binding;GO:0003674//molecular_function;GO:0016740//transferase activity;GO:0003824//catalytic activity	GO:0009056//catabolic process;GO:0016043//cellular component organization;GO:0044237//cellular metabolic process;GO:0008150//biological_process;GO:0071840//cellular component organization or biogenesis;GO:0009987//cellular process;GO:0005975//carbohydrate metabolic process;GO:0008152//metabolic process;GO:0044238//primary metabolic process;GO:0009058//biosynthetic process;GO:0071704//organic subs…
Bra004593	1.24667	0.0566667	-4.45943	yes	0.253333	0.09	-1.49304	no	0.48	0.59	0.297681	no	MYBC1	AT2G40970 (E=3e-091) | myb family transcription factor	-	-	-	-	GO:0043229//intracellular organelle;GO:0005622//intracellular;GO:0043231//intracellular membrane-bounded organelle;GO:0044464//cell part;GO:0005575//cellular_component;GO:0044424//intracellular part;GO:0043226//organelle;GO:0005634//nucleus;GO:0043227//membrane-bounded organelle;GO:0005623//cell	GO:0044877//macromolecular complex binding;GO:0097159//organic cyclic compound binding;GO:0003682//chromatin binding;GO:0001071//nucleic acid binding transcription factor activity;GO:0005488//binding;GO:0003674//molecular_function;GO:0003700//transcription factor activity, sequence-specific DNA binding;GO:1901363//heterocyclic compound binding;GO:0003677//DNA binding;GO:0003676//nucleic acid bind…	GO:0006950//response to stress;GO:0006725//cellular aromatic compound metabolic process;GO:0044237//cellular metabolic process;GO:0034641//cellular nitrogen compound metabolic process;GO:0009058//biosynthetic process;GO:1901360//organic cyclic compound metabolic process;GO:0071704//organic substance metabolic process;GO:0008150//biological_process;GO:0046483//heterocycle metabolic process;GO:0050…
Bra004602	40.39	17.4633	-1.20967	yes	26.09	18.2467	-0.515864	no	10.46	5.87	-0.83345	no	-	AT2G41160 (E=3e-114) | ubiquitin-associated (UBA)/TS-N domain-containing protein	-	-	-	-	GO:0016020//membrane;GO:0005575//cellular_component	GO:0003674//molecular_function;GO:0005515//protein binding;GO:0016787//hydrolase activity;GO:0005488//binding;GO:0003824//catalytic activity	-
Bra004611	0.001	0.001	0	notest	0.0733333	0.001	-6.1964	no	36.39	17.94	-1.02036	yes	-	-	-	-	-	-	-	-	-
Bra004614	8.42333	10.5333	0.322499	no	7.91333	7.49333	-0.0786779	no	11.4433	26.4433	1.2084	yes	-	AT2G41300 (E=6e-172) | strictosidine synthase	-	-	-	-	-	GO:0003674//molecular_function;GO:0003824//catalytic activity	GO:0009058//biosynthetic process;GO:0008152//metabolic process;GO:0008150//biological_process
Bra004621	0.233333	6.98667	4.90414	yes	3.89333	6.05333	0.636724	no	0.206667	0.001	-7.69116	no	-	-	-	-	-	-	-	-	-
Bra004622	5.7	0.25	-4.51096	yes	3.45	1.81667	-0.925303	no	2.43333	0.001	-11.2487	yes	-	AT2G41450 (E=2e-093) | N-acetyltransferase	-	-	-	-	-	GO:0016740//transferase activity;GO:0003824//catalytic activity;GO:0003674//molecular_function	-
Bra004626	1.25333	4.02667	1.68382	yes	1.04333	4.14	1.98843	yes	0.653333	2.77333	2.08573	yes	TPR15	AT2G41520 (E=1e-277) | DNAJ heat shock N-terminal domain-containing protein	Metabolism	Metabolism of terpenoids and polyketides	ko00908//Zeatin biosynthesis	K00279	GO:0043226//organelle;GO:0005575//cellular_component;GO:0005737//cytoplasm;GO:0043231//intracellular membrane-bounded organelle;GO:0009536//plastid;GO:0044464//cell part;GO:0043227//membrane-bounded organelle;GO:0005622//intracellular;GO:0043229//intracellular organelle;GO:0044424//intracellular part;GO:0005623//cell;GO:0044444//cytoplasmic part	GO:0005515//protein binding;GO:0003824//catalytic activity;GO:0003674//molecular_function;GO:1901265//nucleoside phosphate binding;GO:0036094//small molecule binding;GO:1901363//heterocyclic compound binding;GO:0097159//organic cyclic compound binding;GO:0000166//nucleotide binding;GO:0005488//binding	GO:0009987//cellular process;GO:0008152//metabolic process;GO:0008150//biological_process
Bra004630	35.9733	17.1767	-1.06648	yes	37.76	21.8867	-0.786807	no	16.6667	13.9633	-0.255322	no	-	AT2G41630 (E=6e-095) TFIIB | TFIIB (TRANSCRIPTION FACTOR II B); RNA polymerase II transcription factor/ protein binding / transcription regulator/ translation initiation factor/ zinc ion binding	Genetic Information Processing	Transcription	ko03022//Basal transcription factors	K03124	-	GO:0003674//molecular_function;GO:0005488//binding;GO:0005515//protein binding	GO:0008150//biological_process;GO:0006725//cellular aromatic compound metabolic process;GO:0009058//biosynthetic process;GO:0044237//cellular metabolic process;GO:0071704//organic substance metabolic process;GO:1901360//organic cyclic compound metabolic process;GO:0008152//metabolic process;GO:0009987//cellular process;GO:0006139//nucleobase-containing compound metabolic process;GO:0006807//nitro…
Bra004641	15.9533	7.86333	-1.02064	yes	14.1967	7.47333	-0.925728	no	41.72	21.2633	-0.972371	no	-	AT2G41710 (E=5e-164) | ovule development protein, putative	-	-	-	-	GO:0043226//organelle;GO:0005623//cell;GO:0005575//cellular_component;GO:0044424//intracellular part;GO:0044464//cell part;GO:0043231//intracellular membrane-bounded organelle;GO:0043227//membrane-bounded organelle;GO:0043229//intracellular organelle;GO:0005634//nucleus;GO:0005622//intracellular	GO:0003700//transcription factor activity, sequence-specific DNA binding;GO:0001071//nucleic acid binding transcription factor activity;GO:0097159//organic cyclic compound binding;GO:0003676//nucleic acid binding;GO:0005488//binding;GO:0003677//DNA binding;GO:0003674//molecular_function;GO:1901363//heterocyclic compound binding	GO:0044707//single-multicellular organism process;GO:0006807//nitrogen compound metabolic process;GO:0009058//biosynthetic process;GO:0008150//biological_process;GO:0009987//cellular process;GO:0006139//nucleobase-containing compound metabolic process;GO:0044767//single-organism developmental process;GO:0007275//multicellular organism development;GO:0032501//multicellular organismal process;GO:00…
Bra004642	1.31667	9.08667	2.78686	yes	1.04333	10.4433	3.32331	yes	2.69	7.54667	1.48823	yes	EMB2654	AT2G41720 (E=0.0) EMB2654 | EMB2654 (EMBRYO DEFECTIVE 2654)	-	-	-	-	-	GO:0003674//molecular_function;GO:0005488//binding;GO:0005515//protein binding	-
Bra004666	22.97	23.2533	0.0176867	no	19.9467	26.2567	0.396536	no	7.86	18.08	1.20179	yes	-	AT2G42030 (E=2e-094) | zinc finger (C3HC4-type RING finger) family protein	Genetic Information Processing	Folding, sorting and degradation	ko04141//Protein processing in endoplasmic reticulum	K10666	-	GO:0005515//protein binding;GO:0003674//molecular_function;GO:0005488//binding	-
Bra004668	10.6567	1.11	-3.26312	yes	12.8	1.89333	-2.75714	yes	4.92333	0.956667	-2.36355	yes	-	AT2G42070 (E=3e-118) ATNUDT23, ATNUDX23 | ATNUDX23 (ARABIDOPSIS THALIANA NUDIX HYDROLASE HOMOLOG 23); FAD diphosphatase/ hydrolase	Metabolism	Metabolism of cofactors and vitamins;Nucleotide metabolism	ko00230//Purine metabolism;ko00740//Riboflavin metabolism	K18453	-	GO:0003824//catalytic activity;GO:0003674//molecular_function;GO:0016787//hydrolase activity	-
Bra004669	2.94667	0.926667	-1.66896	yes	3.28	1.47667	-1.15135	no	2.93	1.02	-1.52233	yes	-	-	-	-	-	-	-	-	-
Bra004673	26.31	8.49667	-1.63064	yes	9.07667	13.5267	0.575572	no	7.69333	3.50333	-1.13488	no	-	-	-	-	-	-	-	-	-
Bra004676	1.41667	14.4533	3.35083	yes	1.77333	19.8033	3.48121	yes	0.523333	6.25	3.57805	yes	-	AT2G42230 (E=3e-207) | tubulin-specific chaperone C-related	-	-	-	-	-	-	GO:0016043//cellular component organization;GO:0009987//cellular process;GO:0032502//developmental process;GO:0048856//anatomical structure development;GO:0008150//biological_process;GO:0071840//cellular component organization or biogenesis;GO:0009653//anatomical structure morphogenesis
Bra004692	0.001	0.001	0	notest	0.001	0.001	0	notest	0.001	0.613333	9.26053	yes	-	AT2G42410 (E=1e-088) ZFP11, ATZFP11 | ZFP11 (ZINC FINGER PROTEIN 11); nucleic acid binding / transcription factor/ zinc ion binding	-	-	-	-	-	GO:1901363//heterocyclic compound binding;GO:0097159//organic cyclic compound binding;GO:0003674//molecular_function;GO:0005488//binding;GO:0003676//nucleic acid binding	-
Bra004708	4.84	4.01333	-0.270206	no	0.58	1.39333	1.26442	no	4.25333	1.10667	-1.94237	yes	-	-	-	-	-	-	-	-	-
Bra004715	163.83	52.84	-1.6325	yes	54.4033	105.29	0.952601	no	114.71	169.957	0.567176	no	-	-	-	-	-	-	-	-	-
Bra004716	297.91	354.437	0.250651	no	249.827	325.447	0.381494	no	9.28333	36.4567	1.97347	yes	SHP2	AT2G42830 (E=4e-115) SHP2, AGL5 | SHP2 (SHATTERPROOF 2); protein binding / transcription factor	-	-	-	-	GO:0043231//intracellular membrane-bounded organelle;GO:0043229//intracellular organelle;GO:0044424//intracellular part;GO:0043227//membrane-bounded organelle;GO:0005622//intracellular;GO:0005634//nucleus;GO:0005623//cell;GO:0005575//cellular_component;GO:0044464//cell part;GO:0043226//organelle	GO:0003677//DNA binding;GO:0003676//nucleic acid binding;GO:0005515//protein binding;GO:1901363//heterocyclic compound binding;GO:0003674//molecular_function;GO:0003700//transcription factor activity, sequence-specific DNA binding;GO:0005488//binding;GO:0097159//organic cyclic compound binding;GO:0001071//nucleic acid binding transcription factor activity	GO:1901360//organic cyclic compound metabolic process;GO:0006807//nitrogen compound metabolic process;GO:0009058//biosynthetic process;GO:0008150//biological_process;GO:0046483//heterocycle metabolic process;GO:0034641//cellular nitrogen compound metabolic process;GO:0044237//cellular metabolic process;GO:0071704//organic substance metabolic process;GO:0044238//primary metabolic process;GO:000815…
Bra004717	0.41	0.273333	-0.584963	no	0.383333	0.293333	-0.386058	no	0.496667	2.5	2.33158	yes	HVA22F	AT2G42820 (E=2e-083) HVA22F | HVA22F (HVA22-LIKE PROTEIN F)	-	-	-	-	GO:0016020//membrane;GO:0005575//cellular_component	-	-
Bra004720	8.28333	2.09333	-1.98441	yes	14.6	1.73333	-3.07435	yes	91.8667	67.88	-0.436555	no	CSY3	AT2G42790 (E=4e-271) CSY3 | CSY3 (citrate synthase 3); citrate (SI)-synthase	Metabolism	Global and Overview;Carbohydrate metabolism	ko01200//Carbon metabolism;ko01230//Biosynthesis of amino acids;ko01210//2-Oxocarboxylic acid metabolism;ko00630//Glyoxylate and dicarboxylate metabolism;ko00020//Citrate cycle (TCA cycle)	K01647	GO:0005623//cell;GO:0005737//cytoplasm;GO:0005622//intracellular;GO:0043231//intracellular membrane-bounded organelle;GO:0005777//peroxisome;GO:0005575//cellular_component;GO:0043226//organelle;GO:0044444//cytoplasmic part;GO:0042579//microbody;GO:0044464//cell part;GO:0043229//intracellular organelle;GO:0044424//intracellular part;GO:0043227//membrane-bounded organelle	GO:0016740//transferase activity;GO:0003674//molecular_function;GO:0003824//catalytic activity	GO:0006950//response to stress;GO:0043170//macromolecule metabolic process;GO:0009056//catabolic process;GO:0016043//cellular component organization;GO:0044238//primary metabolic process;GO:0071840//cellular component organization or biogenesis;GO:0006629//lipid metabolic process;GO:0009987//cellular process;GO:0005975//carbohydrate metabolic process;GO:0006091//generation of precursor metabolite…
Bra004726	23.7567	8.03667	-1.56366	yes	36.8267	6.99333	-2.3967	yes	8.14	1.83	-2.15319	yes	-	AT2G42670 (E=5e-122) | unknown protein	Metabolism	Metabolism of other amino acids	ko00430//Taurine and hypotaurine metabolism	K10712	-	GO:0003674//molecular_function;GO:0003824//catalytic activity	GO:0008150//biological_process;GO:0008152//metabolic process
Bra004728	1.80333	6.75	1.90422	yes	1.17	9.81667	3.06872	yes	14.0867	7.59333	-0.891525	no	-	AT2G42890 (E=8e-167) AML2 | AML2 (ARABIDOPSIS-MEI2-LIKE 2); RNA binding / nucleic acid binding / nucleotide binding	-	-	-	-	-	GO:0097159//organic cyclic compound binding;GO:0005488//binding;GO:0003676//nucleic acid binding;GO:0000166//nucleotide binding;GO:0003674//molecular_function;GO:1901363//heterocyclic compound binding;GO:1901265//nucleoside phosphate binding;GO:0036094//small molecule binding	-
Bra004729	0.19	0.0833333	-1.18903	no	0.186667	0.15	-0.315502	no	1.25	0.09	-3.79586	yes	-	AT2G42900 (E=2e-100) | FUNCTIONS IN: molecular_function unknown; INVOLVED IN: biological_process unknown; LOCATED IN: cellular_component unknown; EXPRESSED IN: 22 plant structures; EXPRESSED DURING: 13 growth stages; CONTAINS InterPro DOMAIN/s: Plant Basic Secretory Protein (InterPro:IPR007541); Has 25 Blast hits to 25 proteins in 11 species: Archae - 0; Bacteria - 0; Metazoa - 1; Fungi - 0; Plan…	-	-	-	-	-	-	GO:0008150//biological_process
Bra004736	0.0466667	0.0866667	0.893085	no	0.806667	0.18	-2.16398	no	3.37333	1.11333	-1.59929	yes	-	AT2G43000 (E=2e-134) anac042 | anac042 (Arabidopsis NAC domain containing protein 42); transcription factor	-	-	-	-	GO:0005634//nucleus;GO:0043227//membrane-bounded organelle;GO:0043226//organelle;GO:0043231//intracellular membrane-bounded organelle;GO:0005575//cellular_component;GO:0005622//intracellular;GO:0044424//intracellular part;GO:0005623//cell;GO:0043229//intracellular organelle;GO:0044464//cell part	GO:0003676//nucleic acid binding;GO:0003677//DNA binding;GO:0003674//molecular_function;GO:0097159//organic cyclic compound binding;GO:1901363//heterocyclic compound binding;GO:0005488//binding	GO:0006139//nucleobase-containing compound metabolic process;GO:0006725//cellular aromatic compound metabolic process;GO:0071704//organic substance metabolic process;GO:0009987//cellular process;GO:0046483//heterocycle metabolic process;GO:0009058//biosynthetic process;GO:0034641//cellular nitrogen compound metabolic process;GO:0044237//cellular metabolic process;GO:1901360//organic cyclic compou…
Bra004737	43.9833	30.3867	-0.533519	no	81.7233	37.55	-1.12194	yes	29.0567	23.06	-0.333477	no	-	AT2G43020 (E=7e-280) ATPAO2 | ATPAO2 (Polyamine oxidase 2); amine oxidase/ electron carrier/ oxidoreductase	Metabolism	Amino acid metabolism;Metabolism of other amino acids	ko00330//Arginine and proline metabolism;ko00410//beta-Alanine metabolism	K17839	-	GO:0003674//molecular_function;GO:0003824//catalytic activity	GO:0008150//biological_process;GO:0008152//metabolic process
Bra004739	0.001	0.383333	8.58246	yes	0.12	0.0733333	-0.710493	no	0.001	0.001	0	notest	-	AT2G43050 (E=5e-212) ATPMEPCRD | ATPMEPCRD; enzyme inhibitor/ pectinesterase	-	-	-	-	GO:0071944//cell periphery;GO:0044464//cell part;GO:0005618//cell wall;GO:0005623//cell;GO:0005575//cellular_component;GO:0030312//external encapsulating structure	GO:0003674//molecular_function;GO:0003824//catalytic activity;GO:0030234//enzyme regulator activity;GO:0016787//hydrolase activity;GO:0098772//molecular function regulator	GO:0008152//metabolic process;GO:0071704//organic substance metabolic process;GO:0044238//primary metabolic process;GO:0071840//cellular component organization or biogenesis;GO:0009056//catabolic process;GO:0005975//carbohydrate metabolic process;GO:0016043//cellular component organization;GO:0009987//cellular process;GO:0008150//biological_process
Bra004740	30.1233	23.8267	-0.338304	no	94.7633	41.4467	-1.19307	yes	49.1933	28.4667	-0.789189	no	-	AT2G43060 (E=7e-051) | transcription factor	-	-	-	-	-	GO:0005488//binding;GO:0003674//molecular_function;GO:0005515//protein binding	-
Bra004745	9.68	21.2267	1.1328	yes	7.72667	23.7633	1.62082	yes	6.01	11.4667	0.932009	no	-	-	-	-	-	-	-	-	-
Bra004746	0.26	0.0966667	-1.42742	no	1.04	0.4	-1.37851	no	3.68	0.33	-3.47917	yes	-	-	-	-	-	-	-	-	-
Bra004748	2.39667	0.353333	-2.76193	yes	2.05333	0.496667	-2.04762	no	3.55	0.266667	-3.73471	yes	-	AT2G43140 (E=8e-087) | DNA binding / transcription factor	-	-	-	-	-	GO:0005515//protein binding;GO:0003674//molecular_function;GO:0005488//binding	-
Bra004753	0.443333	0.0266667	-4.05528	yes	0.37	0.0233333	-3.98706	no	0.216667	0.0466667	-2.21501	no	-	-	-	-	-	-	-	-	-
Bra004755	1.63333	0.133333	-3.61471	yes	2.00333	0.103333	-4.27702	yes	0.943333	0.0833333	-3.5008	yes	-	AT2G43260 (E=5e-162) | F-box family protein / S locus-related	-	-	-	-	-	GO:0003674//molecular_function;GO:0005488//binding;GO:0005515//protein binding	-
Bra004762	52.0233	26.6633	-0.964302	no	31.15	17.8033	-0.807085	no	14.7867	6.48333	-1.18949	yes	-	AT2G43420 (E=1e-244) | 3-beta hydroxysteroid dehydrogenase/isomerase family protein	Metabolism	Lipid metabolism	ko00100//Steroid biosynthesis	K07748	GO:0044464//cell part;GO:0071944//cell periphery;GO:0005623//cell;GO:0005575//cellular_component;GO:0005886//plasma membrane;GO:0016020//membrane	GO:0003674//molecular_function;GO:0003824//catalytic activity	GO:0044699//single-organism process;GO:0044238//primary metabolic process;GO:0009058//biosynthetic process;GO:0071704//organic substance metabolic process;GO:0008150//biological_process;GO:0044710//single-organism metabolic process;GO:0008152//metabolic process;GO:0006629//lipid metabolic process
Bra004768	0.406667	0.153333	-1.40718	no	0.513333	0.133333	-1.94486	no	34.8633	4.53667	-2.94201	yes	ATTI1	AT2G43510 (E=2e-034) ATTI1 | ATTI1; serine-type endopeptidase inhibitor	-	-	-	-	GO:0005575//cellular_component;GO:0005576//extracellular region	GO:0030234//enzyme regulator activity;GO:0098772//molecular function regulator;GO:0003674//molecular_function	GO:0009607//response to biotic stimulus;GO:0008150//biological_process;GO:0050896//response to stimulus;GO:0009605//response to external stimulus;GO:0006950//response to stress
Bra004771	0.143333	1.33333	3.21759	yes	1.07	0.566667	-0.917039	no	3.1	0.0433333	-6.16065	yes	CHI	AT2G43570 (E=2e-110) | chitinase, putative	Metabolism	Carbohydrate metabolism	ko00520//Amino sugar and nucleotide sugar metabolism	K01183	GO:0071944//cell periphery;GO:0030312//external encapsulating structure;GO:0005576//extracellular region;GO:0044464//cell part;GO:0005618//cell wall;GO:0005623//cell;GO:0005575//cellular_component	GO:0003674//molecular_function;GO:0003824//catalytic activity;GO:0005488//binding;GO:0016787//hydrolase activity	GO:0008150//biological_process;GO:0009987//cellular process;GO:0071704//organic substance metabolic process;GO:0009056//catabolic process;GO:0005975//carbohydrate metabolic process;GO:0044238//primary metabolic process;GO:0008152//metabolic process
Bra004772	0.0466667	0.0733333	0.652077	no	0.001	0.001	0	notest	32.55	7.79	-2.06296	yes	-	AT2G43620 (E=8e-120) | chitinase, putative	Metabolism	Carbohydrate metabolism	ko00520//Amino sugar and nucleotide sugar metabolism	K01183	-	GO:0003824//catalytic activity;GO:0016787//hydrolase activity;GO:0005488//binding;GO:0003674//molecular_function	GO:0071704//organic substance metabolic process;GO:0044238//primary metabolic process;GO:0009987//cellular process;GO:0008152//metabolic process;GO:0005975//carbohydrate metabolic process;GO:0009056//catabolic process;GO:0008150//biological_process
Bra004774	20.2267	25.0067	0.306054	no	16.4767	2.73667	-2.58993	yes	1.73333	3.04	0.810522	no	-	AT4G38940 (E=5e-066) | kelch repeat-containing F-box family protein	-	-	-	-	-	GO:0003674//molecular_function;GO:0005515//protein binding;GO:0005488//binding	-
Bra004776	4.89667	7.79333	0.670441	no	26.9067	11.9967	-1.16533	yes	35.85	38.7933	0.113836	no	-	AT2G43680 (E=1e-141) IQD14 | IQD14; calmodulin binding	-	-	-	-	-	GO:0005515//protein binding;GO:0003674//molecular_function;GO:0005488//binding	-
Bra004784	2.61333	7.22	1.46611	yes	1.82	15.8567	3.12308	yes	3.01	10.3	1.77481	yes	-	AT2G43790 (E=1e-220) ATMPK6, MPK6, MAPK6 | ATMPK6 (ARABIDOPSIS THALIANA MAP KINASE 6); MAP kinase/ kinase	Environmental Information Processing	Signal transduction	ko04075//Plant hormone signal transduction	K14512	-	GO:0016740//transferase activity;GO:0036094//small molecule binding;GO:0016772//transferase activity, transferring phosphorus-containing groups;GO:0005488//binding;GO:0003674//molecular_function;GO:0003824//catalytic activity;GO:0097159//organic cyclic compound binding;GO:1901265//nucleoside phosphate binding;GO:1901363//heterocyclic compound binding;GO:0016301//kinase activity;GO:0000166//nucleo…	GO:0044699//single-organism process;GO:0044763//single-organism cellular process;GO:0044267//cellular protein metabolic process;GO:0065007//biological regulation;GO:0008150//biological_process;GO:0043170//macromolecule metabolic process;GO:0023052//signaling;GO:0009987//cellular process;GO:0007154//cell communication;GO:0051716//cellular response to stimulus;GO:0043412//macromolecule modification…
Bra004797	1.74667	0.376667	-2.21324	yes	1.54333	0.256667	-2.58808	yes	1.14333	0.246667	-2.21261	yes	-	AT2G43990 (E=8e-067) | unknown protein	-	-	-	-	-	-	GO:0022414//reproductive process;GO:0044260//cellular macromolecule metabolic process;GO:0071704//organic substance metabolic process;GO:0048608//reproductive structure development;GO:0032502//developmental process;GO:0044238//primary metabolic process;GO:0006464//cellular protein modification process;GO:0044702//single organism reproductive process;GO:0043412//macromolecule modification;GO:00905…
Bra004798	0.813333	0.001	-9.6677	no	0.001	0.001	0	notest	9.46	0.001	-13.2076	yes	-	-	-	-	-	-	-	-	-
Bra004807	5.95	0.526667	-3.49793	yes	2.14	0.246667	-3.11698	yes	2.23333	0.126667	-4.14009	yes	-	AT2G44130 (E=1e-095) | kelch repeat-containing F-box family protein	-	-	-	-	-	GO:0005488//binding;GO:0003674//molecular_function;GO:0005515//protein binding	-
Bra004812	52.7967	21.9867	-1.26382	yes	36.58	22.1267	-0.725269	no	28.1967	13.09	-1.10706	yes	-	-	-	-	-	-	-	-	-
Bra004815	2.36	0.74	-1.67319	yes	1.27333	0.426667	-1.57743	no	0.21	0.106667	-0.97728	no	-	-	-	-	-	-	-	-	-
Bra004817	7.62	0.296667	-4.68288	yes	0.61	0.336667	-0.857488	no	2.42667	0.59	-2.04019	yes	-	-	-	-	-	-	-	-	-
Bra004823	10.59	8.13	-0.381375	no	16.5267	8.67	-0.930692	no	17.48	7.99	-1.12944	yes	-	-	-	-	-	-	-	-	-
Bra004833	0.001	0.001	0	notest	0.0766667	0.001	-6.26053	no	1.07333	0.001	-10.0679	yes	-	AT3G60120 (E=8e-285) BGLU27 | BGLU27 (BETA GLUCOSIDASE 27); catalytic/ cation binding / hydrolase, hydrolyzing O-glycosyl compounds	Metabolism	Carbohydrate metabolism;Metabolism of other amino acids;Biosynthesis of other secondary metabolites	ko00500//Starch and sucrose metabolism;ko00940//Phenylpropanoid biosynthesis;ko00460//Cyanoamino acid metabolism	K01188	-	GO:0016787//hydrolase activity;GO:0003824//catalytic activity;GO:0003674//molecular_function	GO:0044238//primary metabolic process;GO:0005975//carbohydrate metabolic process;GO:0008150//biological_process;GO:0071704//organic substance metabolic process;GO:0008152//metabolic process
Bra004835	19.2867	78.24	2.0203	yes	9.46333	35.8533	1.92169	yes	0.673333	0.746667	0.149143	no	-	AT2G44450 (E=9e-265) BGLU15 | BGLU15 (BETA GLUCOSIDASE 15); catalytic/ cation binding / hydrolase, hydrolyzing O-glycosyl compounds	Metabolism	Carbohydrate metabolism;Metabolism of other amino acids;Biosynthesis of other secondary metabolites	ko00500//Starch and sucrose metabolism;ko00940//Phenylpropanoid biosynthesis;ko00460//Cyanoamino acid metabolism	K01188	-	GO:0003824//catalytic activity;GO:0003674//molecular_function;GO:0016787//hydrolase activity	GO:0071704//organic substance metabolic process;GO:0008152//metabolic process;GO:0005975//carbohydrate metabolic process;GO:0008150//biological_process;GO:0044238//primary metabolic process
Bra004836	2.76667	0.02	-7.11201	yes	0.0233333	0.001	-4.54432	no	0.0466667	0.001	-5.54432	no	-	AT2G44450 (E=3e-247) BGLU15 | BGLU15 (BETA GLUCOSIDASE 15); catalytic/ cation binding / hydrolase, hydrolyzing O-glycosyl compounds	Metabolism	Carbohydrate metabolism;Metabolism of other amino acids;Biosynthesis of other secondary metabolites	ko00500//Starch and sucrose metabolism;ko00940//Phenylpropanoid biosynthesis;ko00460//Cyanoamino acid metabolism	K01188	-	GO:0003824//catalytic activity;GO:0016787//hydrolase activity;GO:0003674//molecular_function	GO:0008150//biological_process;GO:0005975//carbohydrate metabolic process;GO:0008152//metabolic process;GO:0071704//organic substance metabolic process;GO:0044238//primary metabolic process
Bra004837	0.26	1.13	2.11974	yes	7.05	26.9067	1.93227	yes	24.1833	53.5867	1.14786	yes	BGLU28	AT2G44460 (E=6e-267) BGLU28 | BGLU28 (BETA GLUCOSIDASE 28); catalytic/ cation binding / hydrolase, hydrolyzing O-glycosyl compounds	Metabolism	Carbohydrate metabolism;Metabolism of other amino acids;Biosynthesis of other secondary metabolites	ko00500//Starch and sucrose metabolism;ko00940//Phenylpropanoid biosynthesis;ko00460//Cyanoamino acid metabolism	K01188	GO:0016020//membrane;GO:0005575//cellular_component	GO:0003824//catalytic activity;GO:0016787//hydrolase activity;GO:0003674//molecular_function	GO:0005975//carbohydrate metabolic process;GO:0008152//metabolic process;GO:0071704//organic substance metabolic process;GO:0008150//biological_process;GO:0044238//primary metabolic process
Bra004839	0.001	0.736667	9.52487	yes	0.513333	0.0966667	-2.40881	no	0.303333	0.03	-3.33787	no	PEN2	AT2G44490 (E=1e-220) PEN2, BGLU26 | PEN2 (PENETRATION 2); hydrolase, hydrolyzing O-glycosyl compounds / thioglucosidase	Metabolism	Carbohydrate metabolism;Metabolism of other amino acids;Biosynthesis of other secondary metabolites	ko00500//Starch and sucrose metabolism;ko00940//Phenylpropanoid biosynthesis;ko00460//Cyanoamino acid metabolism	K01188	GO:0005777//peroxisome;GO:0044444//cytoplasmic part;GO:0043231//intracellular membrane-bounded organelle;GO:0044464//cell part;GO:0005575//cellular_component;GO:0042579//microbody;GO:0005623//cell;GO:0016020//membrane;GO:0043226//organelle;GO:0043227//membrane-bounded organelle;GO:0043229//intracellular organelle;GO:0005737//cytoplasm;GO:0005622//intracellular;GO:0009536//plastid;GO:0044424//intr…	GO:0016787//hydrolase activity;GO:0003674//molecular_function;GO:0003824//catalytic activity	GO:0044237//cellular metabolic process;GO:0006950//response to stress;GO:0051234//establishment of localization;GO:0051716//cellular response to stimulus;GO:0071704//organic substance metabolic process;GO:0015979//photosynthesis;GO:0065008//regulation of biological quality;GO:0005975//carbohydrate metabolic process;GO:0006810//transport;GO:0044763//single-organism cellular process;GO:0019748//sec…
Bra004841	13.7267	32.5367	1.24509	yes	17.2133	19.5533	0.183888	no	3.42667	4.08333	0.252941	no	-	-	-	-	-	-	-	-	-
Bra004843	15.9567	31.1367	0.964455	no	11.4167	35.7767	1.64788	yes	4.30333	13.5033	1.64979	yes	-	-	-	-	-	-	-	-	-
Bra004844	0.001	29.78	14.8621	yes	0.001	1.82333	10.8324	yes	0.001	0.001	0	notest	-	AT2G44560 (E=2e-212) AtGH9B11 | AtGH9B11 (Arabidopsis thaliana glycosyl hydrolase 9B11); catalytic/ hydrolase, hydrolyzing O-glycosyl compounds	-	-	-	-	-	GO:0016787//hydrolase activity;GO:0003824//catalytic activity;GO:0003674//molecular_function	GO:0071704//organic substance metabolic process;GO:0009056//catabolic process;GO:0008152//metabolic process;GO:0044238//primary metabolic process;GO:0005975//carbohydrate metabolic process;GO:0009987//cellular process;GO:0008150//biological_process
Bra004846	46.2967	46.0767	-0.00687197	no	12.9433	2.37667	-2.4452	yes	0.05	0.156667	1.6477	no	-	AT2G44560 (E=2e-220) AtGH9B11 | AtGH9B11 (Arabidopsis thaliana glycosyl hydrolase 9B11); catalytic/ hydrolase, hydrolyzing O-glycosyl compounds	-	-	-	-	-	GO:0016787//hydrolase activity;GO:0003824//catalytic activity;GO:0003674//molecular_function	GO:0044238//primary metabolic process;GO:0008150//biological_process;GO:0009056//catabolic process;GO:0005975//carbohydrate metabolic process;GO:0008152//metabolic process;GO:0071704//organic substance metabolic process;GO:0009987//cellular process
Bra004854	6.09333	8.2	0.428392	no	4.13	8.79333	1.09027	no	0.796667	3.73	2.22713	yes	-	AT2G44660 (E=1e-233) | transferase, transferring glycosyl groups / transferase, transferring hexosyl groups	Metabolism	Glycan biosynthesis and metabolism	ko00510//N-Glycan biosynthesis	K03849	GO:0043231//intracellular membrane-bounded organelle;GO:0044464//cell part;GO:0016020//membrane;GO:0005575//cellular_component;GO:0005622//intracellular;GO:0044444//cytoplasmic part;GO:0005737//cytoplasm;GO:0044424//intracellular part;GO:0012505//endomembrane system;GO:0043227//membrane-bounded organelle;GO:0043226//organelle;GO:0005783//endoplasmic reticulum;GO:0005623//cell;GO:0043229//intracel…	GO:0016740//transferase activity;GO:0003674//molecular_function;GO:0003824//catalytic activity	GO:0006950//response to stress;GO:0009628//response to abiotic stimulus;GO:0009987//cellular process;GO:0008150//biological_process;GO:0071840//cellular component organization or biogenesis;GO:0016043//cellular component organization;GO:0050896//response to stimulus
Bra004856	16.79	34.5533	1.04122	yes	22.63	36.5	0.68966	no	5.88667	5.95333	0.0162467	no	-	AT2G44680 (E=6e-098) CKB4 | CKB4 (CASEIN KINASE II BETA SUBUNIT 4); protein serine/threonine kinase	Genetic Information Processing;Organismal Systems	Environmental adaptation;Translation	ko03008//Ribosome biogenesis in eukaryotes;ko04712//Circadian rhythm - plant	K03115	GO:0005622//intracellular;GO:0005623//cell;GO:0005575//cellular_component;GO:0044464//cell part	GO:0030234//enzyme regulator activity;GO:0003674//molecular_function;GO:0098772//molecular function regulator	GO:0009987//cellular process;GO:0071704//organic substance metabolic process;GO:0044237//cellular metabolic process;GO:0019538//protein metabolic process;GO:0006464//cellular protein modification process;GO:0044238//primary metabolic process;GO:0008152//metabolic process;GO:0043170//macromolecule metabolic process;GO:0008150//biological_process;GO:0036211//protein modification process;GO:0043412/…
Bra004857	0.001	2.46	11.2644	yes	2.58667	2.10667	-0.296132	no	1.57333	0.343333	-2.19614	no	ARAC9	AT2G44690 (E=3e-098) ARAC9, ATROP8, ROP8 | ARAC9; GTP binding	Cellular Processes	Transport and catabolism	ko04145//Phagosome	K04392	GO:0005886//plasma membrane;GO:0016020//membrane;GO:0005622//intracellular;GO:0071944//cell periphery;GO:0044464//cell part;GO:0005623//cell;GO:0005575//cellular_component	GO:0036094//small molecule binding;GO:0003674//molecular_function;GO:0097159//organic cyclic compound binding;GO:0005488//binding;GO:1901363//heterocyclic compound binding;GO:0000166//nucleotide binding;GO:1901265//nucleoside phosphate binding	GO:0071840//cellular component organization or biogenesis;GO:0051716//cellular response to stimulus;GO:0008150//biological_process;GO:0044767//single-organism developmental process;GO:0009653//anatomical structure morphogenesis;GO:0007165//signal transduction;GO:0048869//cellular developmental process;GO:0007154//cell communication;GO:0030154//cell differentiation;GO:0050896//response to stimulus…
Bra004859	9.25667	38.8267	2.06848	yes	11.92	44.12	1.88805	yes	9.76	29.0467	1.57342	yes	-	AT2G44730 (E=1e-046) | transcription factor	-	-	-	-	-	GO:0003674//molecular_function;GO:0044877//macromolecular complex binding;GO:0003682//chromatin binding;GO:0005488//binding	-
Bra004872	8.65667	3.44333	-1.33001	yes	15.9667	6.1	-1.38818	yes	7.62	1.98667	-1.93944	yes	-	AT2G44830 (E=5e-262) | protein kinase, putative	-	-	-	-	-	GO:1901363//heterocyclic compound binding;GO:0036094//small molecule binding;GO:0097159//organic cyclic compound binding;GO:0016740//transferase activity;GO:1901265//nucleoside phosphate binding;GO:0003824//catalytic activity;GO:0005488//binding;GO:0016301//kinase activity;GO:0016772//transferase activity, transferring phosphorus-containing groups;GO:0000166//nucleotide binding;GO:0003674//molecu…	GO:0071704//organic substance metabolic process;GO:0044267//cellular protein metabolic process;GO:0044237//cellular metabolic process;GO:0006464//cellular protein modification process;GO:0044260//cellular macromolecule metabolic process;GO:0036211//protein modification process;GO:0019538//protein metabolic process;GO:0044238//primary metabolic process;GO:0009987//cellular process;GO:0008152//meta…
Bra004874	4.52667	5.42333	0.260731	no	11.3667	3.11	-1.86982	yes	2.5	2.73667	0.130492	no	-	AT2G44910 (E=2e-088) ATHB4, ATHB-4 | ATHB4 (ARABIDOPSIS THALIANA HOMEOBOX-LEUCINE ZIPPER PROTEIN 4); DNA binding / transcription factor	-	-	-	-	GO:0044424//intracellular part;GO:0005634//nucleus;GO:0043229//intracellular organelle;GO:0005623//cell;GO:0043226//organelle;GO:0005622//intracellular;GO:0005575//cellular_component;GO:0043227//membrane-bounded organelle;GO:0044464//cell part;GO:0043231//intracellular membrane-bounded organelle	GO:0097159//organic cyclic compound binding;GO:1901363//heterocyclic compound binding;GO:0001071//nucleic acid binding transcription factor activity;GO:0003674//molecular_function;GO:0003676//nucleic acid binding;GO:0003677//DNA binding;GO:0003700//transcription factor activity, sequence-specific DNA binding;GO:0005488//binding	GO:0034641//cellular nitrogen compound metabolic process;GO:0006139//nucleobase-containing compound metabolic process;GO:0006807//nitrogen compound metabolic process;GO:0046483//heterocycle metabolic process;GO:0044238//primary metabolic process;GO:0009987//cellular process;GO:0008152//metabolic process;GO:0044237//cellular metabolic process;GO:0006725//cellular aromatic compound metabolic proces…
Bra004878	0.0433333	0.001	-5.43741	no	0.413333	0.1	-2.04731	no	0.86	0.0966667	-3.15325	yes	-	AT2G44940 (E=2e-084) | AP2 domain-containing transcription factor TINY, putative	-	-	-	-	GO:0044424//intracellular part;GO:0005634//nucleus;GO:0043231//intracellular membrane-bounded organelle;GO:0005622//intracellular;GO:0043226//organelle;GO:0005623//cell;GO:0043229//intracellular organelle;GO:0043227//membrane-bounded organelle;GO:0005575//cellular_component;GO:0044464//cell part	GO:0003677//DNA binding;GO:0001071//nucleic acid binding transcription factor activity;GO:0097159//organic cyclic compound binding;GO:0003676//nucleic acid binding;GO:0005488//binding;GO:0003700//transcription factor activity, sequence-specific DNA binding;GO:0003674//molecular_function;GO:1901363//heterocyclic compound binding	GO:0046483//heterocycle metabolic process;GO:0006807//nitrogen compound metabolic process;GO:1901360//organic cyclic compound metabolic process;GO:0044237//cellular metabolic process;GO:0008150//biological_process;GO:0006139//nucleobase-containing compound metabolic process;GO:0034641//cellular nitrogen compound metabolic process;GO:0006725//cellular aromatic compound metabolic process;GO:0071704…
Bra004881	13.2067	4.43333	-1.5748	yes	11.5633	5.28333	-1.13004	no	25.1233	9.73667	-1.36753	yes	-	AT2G44980 (E=5e-215) | transcription regulatory protein SNF2, putative	-	-	-	-	-	GO:0036094//small molecule binding;GO:0003677//DNA binding;GO:0000166//nucleotide binding;GO:0097159//organic cyclic compound binding;GO:0003676//nucleic acid binding;GO:0016787//hydrolase activity;GO:1901265//nucleoside phosphate binding;GO:1901363//heterocyclic compound binding;GO:0005488//binding;GO:0003824//catalytic activity;GO:0003674//molecular_function	-
Bra004892	52.25	108.51	1.05433	yes	217.86	277.637	0.349797	no	20.4867	18.6867	-0.132676	no	-	AT2G40360 (E=0.0) | transducin family protein / WD-40 repeat family protein	-	-	-	-	GO:0043233//organelle lumen;GO:0044422//organelle part;GO:0005623//cell;GO:0071944//cell periphery;GO:0043232//intracellular non-membrane-bounded organelle;GO:0043227//membrane-bounded organelle;GO:0044446//intracellular organelle part;GO:0005575//cellular_component;GO:0005622//intracellular;GO:0005618//cell wall;GO:0043226//organelle;GO:0005634//nucleus;GO:0043231//intracellular membrane-bounded…	GO:0003824//catalytic activity;GO:0030234//enzyme regulator activity;GO:0016787//hydrolase activity;GO:0003674//molecular_function;GO:0005515//protein binding;GO:0098772//molecular function regulator;GO:0005488//binding	GO:0006139//nucleobase-containing compound metabolic process;GO:0009987//cellular process;GO:0071704//organic substance metabolic process;GO:0005975//carbohydrate metabolic process;GO:0006807//nitrogen compound metabolic process;GO:0071840//cellular component organization or biogenesis;GO:0009056//catabolic process;GO:0016043//cellular component organization;GO:0008152//metabolic process;GO:00346…
Bra004894	13.7033	31.22	1.18794	yes	21.88	32.64	0.577028	no	7.85667	16.8467	1.10047	yes	-	-	-	-	-	-	-	-	-
Bra004896	6.13	3.02333	-1.01975	no	5.09333	2.8	-0.863183	no	3.4	1.05333	-1.69057	yes	-	AT2G45330 (E=4e-108) emb1067 | emb1067 (embryo defective 1067); tRNA 2'-phosphotransferase/ transferase, transferring phosphorus-containing groups	-	-	-	-	-	GO:0003824//catalytic activity;GO:0003674//molecular_function;GO:0016740//transferase activity	GO:0006139//nucleobase-containing compound metabolic process;GO:0008150//biological_process;GO:0044238//primary metabolic process;GO:0006807//nitrogen compound metabolic process;GO:0044237//cellular metabolic process;GO:0006725//cellular aromatic compound metabolic process;GO:0071704//organic substance metabolic process;GO:1901360//organic cyclic compound metabolic process;GO:0034641//cellular ni…
Bra004898	27.2567	26.4367	-0.0440689	no	64.7967	29.6433	-1.12821	yes	195.3	222.32	0.186946	no	-	AT2G45290 (E=0.0) | transketolase, putative	Metabolism	Global and Overview;Energy metabolism;Carbohydrate metabolism	ko01200//Carbon metabolism;ko01230//Biosynthesis of amino acids;ko00710//Carbon fixation in photosynthetic organisms;ko00030//Pentose phosphate pathway	K00615	GO:0043231//intracellular membrane-bounded organelle;GO:0044444//cytoplasmic part;GO:0044464//cell part;GO:0009536//plastid;GO:0043229//intracellular organelle;GO:0005622//intracellular;GO:0043226//organelle;GO:0043227//membrane-bounded organelle;GO:0044424//intracellular part;GO:0005737//cytoplasm;GO:0005575//cellular_component;GO:0005623//cell	GO:0016740//transferase activity;GO:0003674//molecular_function;GO:0003824//catalytic activity	GO:0008152//metabolic process;GO:0008150//biological_process
Bra004907	1.31333	5.28333	2.00822	yes	0.28	2.02333	2.85324	yes	0.606667	0.56	-0.115477	no	-	AT2G45400 (E=2e-132) BEN1 | BEN1; binding / catalytic/ coenzyme binding / oxidoreductase, acting on CH-OH group of donors	-	-	-	-	-	GO:0003824//catalytic activity;GO:0005488//binding;GO:0003674//molecular_function	GO:0009987//cellular process;GO:0008150//biological_process;GO:0008152//metabolic process
Bra004910	1.36333	6.86333	2.33177	yes	22.5767	26.7167	0.242908	no	16.2567	7.38	-1.13934	yes	-	-	-	-	-	-	-	-	-
Bra004914	21.07	10.11	-1.05941	yes	16.2333	10.72	-0.598654	no	6.52333	5.06333	-0.365522	no	-	AT2G45460 (E=0.0) | forkhead-associated domain-containing protein / FHA domain-containing protein	-	-	-	-	-	GO:0005488//binding;GO:0005515//protein binding;GO:0001071//nucleic acid binding transcription factor activity;GO:0003700//transcription factor activity, sequence-specific DNA binding;GO:0003674//molecular_function	GO:0009987//cellular process;GO:0046483//heterocycle metabolic process;GO:0009058//biosynthetic process;GO:1901360//organic cyclic compound metabolic process;GO:0006725//cellular aromatic compound metabolic process;GO:0008152//metabolic process;GO:0044237//cellular metabolic process;GO:0044238//primary metabolic process;GO:0008150//biological_process;GO:0006807//nitrogen compound metabolic proces…
Bra004915	268.36	189.48	-0.502124	no	91.3867	34.49	-1.40581	yes	32.7733	37.8233	0.206754	no	-	AT2G45470 (E=2e-155) FLA8, AGP8 | FLA8 (FASCICLIN-LIKE ARABINOGALACTAN PROTEIN 8)	-	-	-	-	GO:0005623//cell;GO:0071944//cell periphery;GO:0005575//cellular_component;GO:0016020//membrane;GO:0030312//external encapsulating structure;GO:0005886//plasma membrane;GO:0005576//extracellular region;GO:0044464//cell part;GO:0005618//cell wall	-	-
Bra004921	3.38333	0.216667	-3.9649	yes	1.86667	0.276667	-2.75424	yes	1.23333	1.08667	-0.182653	no	CYP76C3	AT2G45580 (E=1e-212) CYP76C3 | CYP76C3; electron carrier/ heme binding / iron ion binding / monooxygenase/ oxygen binding	-	-	-	-	-	GO:0005488//binding;GO:0003824//catalytic activity;GO:0003674//molecular_function	GO:0008150//biological_process;GO:0008152//metabolic process
Bra004922	0.573333	2.38	2.05352	yes	2.12333	2.26	0.0899919	no	0.633333	0.6	-0.0780025	no	-	-	-	-	-	-	-	-	-
Bra004931	6.49667	2.83	-1.1989	yes	12.0733	16.6767	0.466007	no	4.12333	2.30667	-0.838002	no	-	AT2G45720 (E=4e-233) | armadillo/beta-catenin repeat family protein	-	-	-	-	-	GO:0003674//molecular_function;GO:0005488//binding;GO:0005515//protein binding	-
Bra004933	12.3	5.4	-1.18763	yes	9.56	4.52	-1.08069	no	4.82	1.19	-2.01807	yes	-	AT2G45750 (E=0.0) | dehydration-responsive family protein	-	-	-	-	-	GO:0003674//molecular_function;GO:0003824//catalytic activity;GO:0016740//transferase activity	GO:0008152//metabolic process;GO:0008150//biological_process
Bra004934	0.266667	0.463333	0.797013	no	5.24333	5.66333	0.111167	no	8.62667	4.26	-1.01795	yes	-	AT3G61150 (E=2e-283) HDG1, HD-GL2-1 | HDG1 (HOMEODOMAIN GLABROUS 1); DNA binding / transcription factor	-	-	-	-	GO:0043226//organelle;GO:0043227//membrane-bounded organelle;GO:0043231//intracellular membrane-bounded organelle;GO:0005623//cell;GO:0005622//intracellular;GO:0005575//cellular_component;GO:0043229//intracellular organelle;GO:0005634//nucleus;GO:0044424//intracellular part;GO:0044464//cell part	GO:0001071//nucleic acid binding transcription factor activity;GO:1901363//heterocyclic compound binding;GO:0097159//organic cyclic compound binding;GO:0003674//molecular_function;GO:0008289//lipid binding;GO:0003677//DNA binding;GO:0003676//nucleic acid binding;GO:0003700//transcription factor activity, sequence-specific DNA binding;GO:0005488//binding	GO:0008152//metabolic process;GO:0044237//cellular metabolic process;GO:1901360//organic cyclic compound metabolic process;GO:0034641//cellular nitrogen compound metabolic process;GO:0008150//biological_process;GO:0009987//cellular process;GO:0006807//nitrogen compound metabolic process;GO:0046483//heterocycle metabolic process;GO:0006139//nucleobase-containing compound metabolic process;GO:00090…
Bra004937	2.68	4.30667	0.684339	no	1.63667	4.37333	1.41797	no	17.51	4.85667	-1.85014	yes	-	AT2G45770 (E=3e-190) CPFTSY, FRD4 | CPFTSY; 7S RNA binding / GTP binding / nucleoside-triphosphatase/ nucleotide binding	Genetic Information Processing	Folding, sorting and degradation	ko03060//Protein export	K03110	-	GO:0005488//binding;GO:0003674//molecular_function;GO:1901363//heterocyclic compound binding;GO:0003824//catalytic activity;GO:0000166//nucleotide binding;GO:1901265//nucleoside phosphate binding;GO:0036094//small molecule binding;GO:0097159//organic cyclic compound binding;GO:0016787//hydrolase activity	GO:0051179//localization;GO:0051234//establishment of localization;GO:0009987//cellular process;GO:0008150//biological_process;GO:0071840//cellular component organization or biogenesis;GO:0016043//cellular component organization;GO:0006810//transport
Bra004942	0.26	0.246667	-0.0759489	no	0.65	0.001	-9.3443	yes	0.0166667	0.001	-4.05889	no	-	-	-	-	-	-	-	-	-
Bra004954	38.7867	12.0167	-1.69052	yes	41.5633	13.2033	-1.65441	yes	7.08667	2.02667	-1.806	yes	-	AT2G45990 (E=2e-136) | unknown protein	-	-	-	-	GO:0043229//intracellular organelle;GO:0009536//plastid;GO:0043227//membrane-bounded organelle;GO:0043231//intracellular membrane-bounded organelle;GO:0043226//organelle;GO:0044424//intracellular part;GO:0005575//cellular_component;GO:0005623//cell;GO:0044444//cytoplasmic part;GO:0005737//cytoplasm;GO:0044464//cell part;GO:0005622//intracellular	-	GO:0008152//metabolic process;GO:0015979//photosynthesis;GO:0009058//biosynthetic process;GO:0071840//cellular component organization or biogenesis;GO:0008150//biological_process;GO:0016043//cellular component organization;GO:0044237//cellular metabolic process;GO:0006091//generation of precursor metabolites and energy;GO:0009987//cellular process
Bra004955	11.2033	0.0666667	-7.39275	yes	9.83	0.273333	-5.16846	yes	0.86	0.05	-4.10434	yes	-	-	-	-	-	-	-	-	-
Bra004966	0.0533333	0.263333	2.30378	no	17.9533	103.83	2.5319	yes	3.12	2.95667	-0.0775744	no	-	AT2G40370 (E=2e-283) LAC5 | LAC5 (laccase 5); laccase	-	-	-	-	GO:0005576//extracellular region;GO:0005575//cellular_component	GO:0003674//molecular_function;GO:0003824//catalytic activity;GO:0005488//binding	GO:0044710//single-organism metabolic process;GO:0019748//secondary metabolic process;GO:0008150//biological_process;GO:0009987//cellular process;GO:0009056//catabolic process;GO:0044699//single-organism process;GO:0008152//metabolic process
Bra004989	26.1633	61.89	1.24216	yes	70.88	93.6567	0.402003	no	20.3967	20.9833	0.0409105	no	LHCB4.3	AT2G40100 (E=1e-133) LHCB4.3 | LHCB4.3 (light harvesting complex PSII); chlorophyll binding	Metabolism	Energy metabolism	ko00196//Photosynthesis - antenna proteins	K08915	GO:0043231//intracellular membrane-bounded organelle;GO:0005575//cellular_component;GO:0016020//membrane;GO:0005622//intracellular;GO:0044464//cell part;GO:0009579//thylakoid;GO:0005623//cell;GO:0043229//intracellular organelle;GO:0043226//organelle;GO:0044424//intracellular part;GO:0044444//cytoplasmic part;GO:0043227//membrane-bounded organelle;GO:0009536//plastid;GO:0005737//cytoplasm	GO:0005488//binding;GO:0003674//molecular_function	GO:0006807//nitrogen compound metabolic process;GO:0008152//metabolic process;GO:0015979//photosynthesis;GO:0043412//macromolecule modification;GO:0071704//organic substance metabolic process;GO:0046483//heterocycle metabolic process;GO:0006725//cellular aromatic compound metabolic process;GO:1901360//organic cyclic compound metabolic process;GO:0006139//nucleobase-containing compound metabolic p…
Bra005012	6.73667	5.02333	-0.42339	no	10.0133	7.27333	-0.461234	no	2.51667	0.886667	-1.50505	yes	-	AT2G39800 (E=0.0) P5CS1, ATP5CS | P5CS1 (DELTA1-PYRROLINE-5-CARBOXYLATE SYNTHASE 1); delta1-pyrroline-5-carboxylate synthetase	Metabolism	Amino acid metabolism;Global and Overview	ko01230//Biosynthesis of amino acids;ko00330//Arginine and proline metabolism	K12657	GO:0005737//cytoplasm;GO:0005622//intracellular;GO:0044464//cell part;GO:0005575//cellular_component;GO:0005623//cell;GO:0044424//intracellular part	GO:0016740//transferase activity;GO:1901363//heterocyclic compound binding;GO:0005488//binding;GO:0097159//organic cyclic compound binding;GO:0016772//transferase activity, transferring phosphorus-containing groups;GO:0003674//molecular_function;GO:0000166//nucleotide binding;GO:0036094//small molecule binding;GO:0003824//catalytic activity;GO:1901265//nucleoside phosphate binding;GO:0016301//kin…	GO:0009058//biosynthetic process;GO:0009987//cellular process;GO:0008152//metabolic process;GO:0008150//biological_process
Bra005013	24.0033	7.93667	-1.59663	yes	22.0533	6.82	-1.69315	yes	15.23	5.45333	-1.48171	yes	-	AT2G39795 (E=2e-093) | mitochondrial glycoprotein family protein / MAM33 family protein	-	-	-	-	GO:0043226//organelle;GO:0005739//mitochondrion;GO:0043227//membrane-bounded organelle;GO:0005575//cellular_component;GO:0044444//cytoplasmic part;GO:0005622//intracellular;GO:0043229//intracellular organelle;GO:0044464//cell part;GO:0043231//intracellular membrane-bounded organelle;GO:0044424//intracellular part;GO:0005623//cell;GO:0005737//cytoplasm	-	-
Bra005018	57.2667	25.5567	-1.164	yes	60.7233	27.9567	-1.11906	yes	22.4767	14.9667	-0.586675	no	-	AT2G39750 (E=0.0) | dehydration-responsive family protein	-	-	-	-	-	GO:0003824//catalytic activity;GO:0003674//molecular_function;GO:0016740//transferase activity	GO:0008150//biological_process;GO:0008152//metabolic process
Bra005019	25.5433	11.8967	-1.10239	yes	30.0667	7.55333	-1.99298	yes	16.2033	16.1567	-0.00416105	no	-	AT2G39730 (E=2e-259) RCA | RCA (RUBISCO ACTIVASE); ADP binding / ATP binding / enzyme regulator/ ribulose-1,5-bisphosphate carboxylase/oxygenase activator	-	-	-	-	-	GO:0097159//organic cyclic compound binding;GO:1901363//heterocyclic compound binding;GO:0003674//molecular_function;GO:1901265//nucleoside phosphate binding;GO:0036094//small molecule binding;GO:0000166//nucleotide binding;GO:0005488//binding	-
Bra005020	11.3333	6.22667	-0.86404	no	28.5467	9.12667	-1.64516	yes	7.56667	2.87	-1.39861	yes	-	AT2G39720 (E=7e-079) RHC2A | RHC2A; protein binding / zinc ion binding	-	-	-	-	-	GO:0005515//protein binding;GO:0003674//molecular_function;GO:0005488//binding	-
Bra005023	8.82667	1.04333	-3.08067	yes	14.37	1.27667	-3.49261	yes	1.53333	0.45	-1.76867	no	-	AT1G53750 (E=8e-136) RPT1A | RPT1A (REGULATORY PARTICLE TRIPLE-A 1A); ATPase	Genetic Information Processing	Folding, sorting and degradation	ko03050//Proteasome	K03061	-	GO:1901265//nucleoside phosphate binding;GO:0003674//molecular_function;GO:0097159//organic cyclic compound binding;GO:0005488//binding;GO:0000166//nucleotide binding;GO:0016787//hydrolase activity;GO:1901363//heterocyclic compound binding;GO:0036094//small molecule binding;GO:0003824//catalytic activity	-
Bra005028	36.6833	74.3867	1.01992	yes	7.30667	8.32333	0.187948	no	2.52333	3.57	0.500593	no	-	AT2G39640 (E=1e-194) | glycosyl hydrolase family 17 protein	-	-	-	-	-	GO:0016787//hydrolase activity;GO:0003674//molecular_function;GO:0003824//catalytic activity	GO:0008152//metabolic process;GO:0005975//carbohydrate metabolic process;GO:0044238//primary metabolic process;GO:0071704//organic substance metabolic process;GO:0008150//biological_process
Bra005031	5.34333	18.1267	1.7623	yes	6.07333	17.8667	1.55671	yes	1.9	5.87667	1.629	yes	ATGGT-IB	AT2G39550 (E=2e-172) ATGGT-IB, GGB, PGGT-I | PGGT-I; CAAX-protein geranylgeranyltransferase/ protein heterodimerization	-	-	-	-	-	GO:0016740//transferase activity;GO:0003674//molecular_function;GO:0003824//catalytic activity	GO:0065007//biological regulation;GO:0044260//cellular macromolecule metabolic process;GO:0007154//cell communication;GO:0051716//cellular response to stimulus;GO:0009628//response to abiotic stimulus;GO:0006464//cellular protein modification process;GO:0044700//single organism signaling;GO:0009719//response to endogenous stimulus;GO:0071704//organic substance metabolic process;GO:0050896//respon…
Bra005032	0.876667	6.77	2.94906	yes	3.3	10.1767	1.62473	no	7.57667	8.04333	0.0862302	no	-	AT2G39518 (E=2e-052) | FUNCTIONS IN: molecular_function unknown; INVOLVED IN: biological_process unknown; LOCATED IN: endomembrane system; CONTAINS InterPro DOMAIN/s: Uncharacterised protein family UPF0497, trans-membrane plant (InterPro:IPR006702), Uncharacterised protein family UPF0497, trans-membrane plant subgroup (InterPro:IPR006459); BEST Arabidopsis thaliana protein match is: integral memb…	-	-	-	-	GO:0005623//cell;GO:0005575//cellular_component;GO:0005886//plasma membrane;GO:0016020//membrane;GO:0071944//cell periphery;GO:0044464//cell part	-	-
Bra005033	70.6867	300.457	2.08765	yes	207.72	623.793	1.58643	yes	162.91	168.35	0.0473886	no	-	AT2G39510 (E=2e-189) | nodulin MtN21 family protein	-	-	-	-	GO:0005575//cellular_component;GO:0016020//membrane	GO:0005215//transporter activity;GO:0003674//molecular_function	GO:0008150//biological_process;GO:0051179//localization;GO:0009987//cellular process;GO:0006810//transport;GO:0051234//establishment of localization
Bra005047	0.001	0.001	0	notest	0.001	0.001	0	notest	0.001	0.736667	9.52487	yes	-	-	-	-	-	-	-	-	-
Bra005050	5.38333	12.8	1.24957	yes	6.82	16.01	1.23113	yes	4.43333	12.6267	1.51001	yes	-	-	-	-	-	-	-	-	-
Bra005052	5.38333	12.8	1.24957	yes	6.82	16.01	1.23113	yes	4.43333	12.6267	1.51001	yes	-	-	-	-	-	-	-	-	-
Bra005058	2.02	5.69667	1.49576	yes	1.36333	1.91333	0.48895	no	1.23667	0.916667	-0.431988	no	-	AT2G39220 (E=3e-239) PLP6, PLA IIB | PLP6 (PATATIN-LIKE PROTEIN 6); nutrient reservoir	-	-	-	-	-	GO:0003674//molecular_function;GO:0016787//hydrolase activity;GO:0003824//catalytic activity	GO:0008150//biological_process;GO:0044238//primary metabolic process;GO:0071704//organic substance metabolic process;GO:0044710//single-organism metabolic process;GO:0006629//lipid metabolic process;GO:0008152//metabolic process;GO:0044699//single-organism process;GO:0009056//catabolic process
Bra005059	10.3333	9.19333	-0.168646	no	7.64333	3.85	-0.989344	no	10.3833	4.25333	-1.2876	yes	-	AT2G39210 (E=7e-272) | nodulin family protein	-	-	-	-	GO:0005575//cellular_component;GO:0016020//membrane	-	GO:0051179//localization;GO:0008150//biological_process;GO:0006810//transport;GO:0051234//establishment of localization;GO:0009987//cellular process
Bra005061	34.7333	8.66333	-2.00333	yes	8.44	2.64667	-1.67307	yes	3.78333	1.45	-1.3836	yes	-	AT2G39130 (E=1e-212) | amino acid transporter family protein	-	-	-	-	GO:0016020//membrane;GO:0005575//cellular_component	-	-
Bra005070	0.31	1.06333	1.77825	no	0.47	1	1.08927	no	1.61	0.523333	-1.62126	yes	-	AT2G38940 (E=8e-262) ATPT2, PHT1;4 | ATPT2 (ARABIDOPSIS THALIANA PHOSPHATE TRANSPORTER 2); carbohydrate transmembrane transporter/ inorganic phosphate transmembrane transporter/ phosphate transmembrane transporter/ sugar:hydrogen symporter	-	-	-	-	GO:0016020//membrane;GO:0005575//cellular_component	GO:0003674//molecular_function;GO:0005215//transporter activity	GO:0051179//localization;GO:0009987//cellular process;GO:0051234//establishment of localization;GO:0008150//biological_process;GO:0006810//transport
Bra005071	0.513333	5.65333	3.46113	yes	1.28667	4.33333	1.75184	no	5.67667	3.06667	-0.888373	no	-	AT2G38940 (E=1e-129) ATPT2, PHT1;4 | ATPT2 (ARABIDOPSIS THALIANA PHOSPHATE TRANSPORTER 2); carbohydrate transmembrane transporter/ inorganic phosphate transmembrane transporter/ phosphate transmembrane transporter/ sugar:hydrogen symporter	-	-	-	-	GO:0016020//membrane;GO:0005575//cellular_component	GO:0003674//molecular_function;GO:0005215//transporter activity	GO:0006810//transport;GO:0009987//cellular process;GO:0051179//localization;GO:0051234//establishment of localization;GO:0008150//biological_process
Bra005075	3.35667	1.11667	-1.58783	yes	9.15	2.92	-1.6478	no	0.001	0.04	5.32193	no	-	AT1G80070 (E=8e-114) SUS2, EMB33, EMB177, EMB14 | SUS2 (ABNORMAL SUSPENSOR 2)	Genetic Information Processing	Transcription	ko03040//Spliceosome	K12856	GO:0005575//cellular_component;GO:0043231//intracellular membrane-bounded organelle;GO:0005623//cell;GO:0043227//membrane-bounded organelle;GO:0005634//nucleus;GO:0043229//intracellular organelle;GO:0005622//intracellular;GO:0044464//cell part;GO:0044424//intracellular part;GO:0043226//organelle	GO:1901363//heterocyclic compound binding;GO:0097159//organic cyclic compound binding;GO:0005488//binding;GO:0003676//nucleic acid binding;GO:0003674//molecular_function	GO:0044237//cellular metabolic process;GO:0044238//primary metabolic process;GO:0046483//heterocycle metabolic process;GO:0008150//biological_process;GO:0006725//cellular aromatic compound metabolic process;GO:0006139//nucleobase-containing compound metabolic process;GO:0034641//cellular nitrogen compound metabolic process;GO:0006807//nitrogen compound metabolic process;GO:0008152//metabolic proc…
Bra005099	403.643	485.237	0.265608	no	445.083	492.357	0.145628	no	54.83	2.90667	-4.23753	yes	-	AT2G38540 (E=1e-044) LP1, LTP1, ATLTP1 | LP1; calmodulin binding	-	-	-	-	-	GO:0008289//lipid binding;GO:0003674//molecular_function;GO:0005488//binding	GO:0006810//transport;GO:0051234//establishment of localization;GO:0008150//biological_process;GO:0051179//localization
Bra005104	2.08333	0.03	-6.11779	yes	0.97	0.0233333	-5.37752	yes	3.89667	0.18	-4.43617	yes	-	AT2G38470 (E=3e-093) WRKY33, ATWRKY33 | WRKY33; transcription factor	Organismal Systems	Environmental adaptation	ko04626//Plant-pathogen interaction	K13424	-	GO:0003674//molecular_function;GO:1901363//heterocyclic compound binding;GO:0003676//nucleic acid binding;GO:0003677//DNA binding;GO:0005488//binding;GO:0003700//transcription factor activity, sequence-specific DNA binding;GO:0097159//organic cyclic compound binding;GO:0001071//nucleic acid binding transcription factor activity	GO:0008152//metabolic process;GO:0046483//heterocycle metabolic process;GO:0044238//primary metabolic process;GO:1901360//organic cyclic compound metabolic process;GO:0009058//biosynthetic process;GO:0008150//biological_process;GO:0071704//organic substance metabolic process;GO:0034641//cellular nitrogen compound metabolic process;GO:0009987//cellular process;GO:0006807//nitrogen compound metabol…
Bra005137	14.1633	7.32333	-0.951588	no	32.2033	8.22	-1.97	yes	0.001	0.001	0	notest	-	AT2G38110 (E=2e-251) ATGPAT6, GPAT6 | GPAT6 (GLYCEROL-3-PHOSPHATE ACYLTRANSFERASE 6); 1-acylglycerol-3-phosphate O-acyltransferase/ acyltransferase	Metabolism	Lipid metabolism	ko00564//Glycerophospholipid metabolism;ko00561//Glycerolipid metabolism	K13508	-	GO:0016740//transferase activity;GO:0003674//molecular_function;GO:0003824//catalytic activity	GO:0008152//metabolic process;GO:0008150//biological_process
Bra005142	0.343333	0.0433333	-2.98606	no	0.45	0.001	-8.81378	yes	0.001	0.001	0	notest	-	AT4G38940 (E=2e-066) | kelch repeat-containing F-box family protein	-	-	-	-	-	GO:0005488//binding;GO:0003674//molecular_function;GO:0005515//protein binding	-
Bra005143	33.73	56.8467	0.753043	no	2.60667	8.81333	1.75748	yes	0.246667	0.14	-0.817136	no	-	-	-	-	-	-	-	-	-
Bra005146	1.13333	0.001	-10.1464	yes	1.08333	0.0833333	-3.70044	yes	0.07	0.001	-6.12928	no	-	-	-	-	-	-	-	-	-
Bra005166	3.2	0.216667	-3.88452	yes	0.65	0.443333	-0.552048	no	1.29	1.77667	0.461802	no	-	AT2G28700 (E=8e-035) AGL46 | AGL46 (AGAMOUS-LIKE 46); DNA binding / transcription factor	-	-	-	-	GO:0005575//cellular_component;GO:0043227//membrane-bounded organelle;GO:0005622//intracellular;GO:0005623//cell;GO:0043229//intracellular organelle;GO:0044424//intracellular part;GO:0043231//intracellular membrane-bounded organelle;GO:0043226//organelle;GO:0005634//nucleus;GO:0044464//cell part	GO:0097159//organic cyclic compound binding;GO:0005515//protein binding;GO:0003677//DNA binding;GO:0003674//molecular_function;GO:0003676//nucleic acid binding;GO:0005488//binding;GO:1901363//heterocyclic compound binding	GO:0006725//cellular aromatic compound metabolic process;GO:0071704//organic substance metabolic process;GO:0006807//nitrogen compound metabolic process;GO:0046483//heterocycle metabolic process;GO:1901360//organic cyclic compound metabolic process;GO:0009987//cellular process;GO:0034641//cellular nitrogen compound metabolic process;GO:0008152//metabolic process;GO:0009058//biosynthetic process;G…
Bra005169	0.0633333	0.001	-5.98489	no	0.001	0.373333	8.54432	yes	0.0566667	0.001	-5.82443	no	-	AT2G37700 (E=5e-233) | catalytic/ iron ion binding / oxidoreductase	Metabolism	Lipid metabolism	ko00073//Cutin, suberine and wax biosynthesis	K15404	GO:0016020//membrane;GO:0005575//cellular_component	GO:0003824//catalytic activity;GO:0005488//binding;GO:0003674//molecular_function	GO:0009058//biosynthetic process;GO:0009987//cellular process;GO:0044699//single-organism process;GO:0071704//organic substance metabolic process;GO:0006629//lipid metabolic process;GO:0008150//biological_process;GO:0044710//single-organism metabolic process;GO:0008152//metabolic process;GO:0044238//primary metabolic process
Bra005173	0.04	0.001	-5.32193	no	0.001	0.001	0	notest	0.366667	0.001	-8.51833	yes	-	-	-	-	-	-	-	-	-
Bra005174	1.15	6.81333	2.56673	yes	4.01333	2.01667	-0.992828	no	6.45333	2.29333	-1.4926	yes	-	AT5G02230 (E=3e-107) | haloacid dehalogenase-like hydrolase family protein	-	-	-	-	-	GO:0016787//hydrolase activity;GO:0003674//molecular_function;GO:0003824//catalytic activity	GO:0008152//metabolic process;GO:0008150//biological_process
Bra005177	1.09333	11.95	3.45021	yes	2.06	11.7467	2.51154	yes	2.42	20.75	3.10003	yes	-	AT2G37630 (E=1e-161) ATPHAN, AS1, ATMYB91, MYB91 | AS1 (ASYMMETRIC LEAVES 1); DNA binding / protein homodimerization/ transcription factor	-	-	-	-	GO:0044464//cell part;GO:0043226//organelle;GO:0005622//intracellular;GO:0005634//nucleus;GO:0005575//cellular_component;GO:0043229//intracellular organelle;GO:0043227//membrane-bounded organelle;GO:0005623//cell;GO:0044424//intracellular part;GO:0043231//intracellular membrane-bounded organelle	GO:0003682//chromatin binding;GO:0003676//nucleic acid binding;GO:1901363//heterocyclic compound binding;GO:0003674//molecular_function;GO:0097159//organic cyclic compound binding;GO:0005488//binding;GO:0003677//DNA binding;GO:0044877//macromolecular complex binding	GO:0006139//nucleobase-containing compound metabolic process;GO:0009987//cellular process;GO:0032501//multicellular organismal process;GO:0009058//biosynthetic process;GO:0044699//single-organism process;GO:0034641//cellular nitrogen compound metabolic process;GO:0006807//nitrogen compound metabolic process;GO:0006725//cellular aromatic compound metabolic process;GO:0044237//cellular metabolic pr…
Bra005192	0.9	0.001	-9.81378	yes	0.696667	0.001	-9.44432	yes	0.176667	0.001	-7.46489	no	-	-	-	-	-	-	-	-	-
Bra005193	0.76	4.81667	2.66396	yes	3.36333	7.53	1.16276	no	7.82333	4.41333	-0.825915	no	-	AT2G37460 (E=6e-197) | nodulin MtN21 family protein	-	-	-	-	GO:0016020//membrane;GO:0005575//cellular_component	GO:0003674//molecular_function;GO:0005215//transporter activity	GO:0008150//biological_process;GO:0051234//establishment of localization;GO:0009987//cellular process;GO:0006810//transport;GO:0051179//localization
Bra005201	2.02	0.606667	-1.73538	no	3.66333	0.586667	-2.64254	yes	4.41667	3.23333	-0.449936	no	-	AT2G37390 (E=2e-085) | heavy-metal-associated domain-containing protein	-	-	-	-	-	GO:0005488//binding;GO:0003674//molecular_function	GO:0051234//establishment of localization;GO:0051179//localization;GO:0006810//transport;GO:0008150//biological_process
Bra005206	1.28333	3.27	1.34939	yes	1.12	3.97667	1.82806	no	0.68	2.42	1.8314	yes	-	-	-	-	-	-	-	-	-
Bra005207	2.53	6.02	1.25063	yes	1.17	3.92333	1.74557	yes	0.001	0.12	6.90689	yes	-	AT2G37280 (E=0.0) PDR5, ATPDR5 | PDR5 (PLEIOTROPIC DRUG RESISTANCE 5); ATPase, coupled to transmembrane movement of substances	-	-	-	-	GO:0005575//cellular_component;GO:0016020//membrane	GO:0003824//catalytic activity;GO:0097159//organic cyclic compound binding;GO:0016787//hydrolase activity;GO:0000166//nucleotide binding;GO:1901265//nucleoside phosphate binding;GO:0036094//small molecule binding;GO:0003674//molecular_function;GO:0005488//binding;GO:1901363//heterocyclic compound binding	-
Bra005208	35.4733	70.84	0.997829	no	43.42	108.453	1.32064	yes	1.92	9.18667	2.25844	yes	-	AT2G37280 (E=0.0) PDR5, ATPDR5 | PDR5 (PLEIOTROPIC DRUG RESISTANCE 5); ATPase, coupled to transmembrane movement of substances	-	-	-	-	GO:0016020//membrane;GO:0005575//cellular_component	GO:0003674//molecular_function;GO:0000166//nucleotide binding;GO:1901265//nucleoside phosphate binding;GO:0036094//small molecule binding;GO:0016787//hydrolase activity;GO:0097159//organic cyclic compound binding;GO:0003824//catalytic activity;GO:0005488//binding;GO:1901363//heterocyclic compound binding	-
Bra005210	4.86	0.376667	-3.6896	yes	6.54667	0.513333	-3.67279	yes	1.38667	0.39	-1.83007	yes	-	AT2G37260 (E=8e-101) TTG2, ATWRKY44, WRKY44, DSL1 | TTG2 (TRANSPARENT TESTA GLABRA 2); transcription factor	-	-	-	-	-	GO:0003674//molecular_function;GO:0097159//organic cyclic compound binding;GO:0001071//nucleic acid binding transcription factor activity;GO:0003676//nucleic acid binding;GO:0005488//binding;GO:0003700//transcription factor activity, sequence-specific DNA binding;GO:0003677//DNA binding;GO:1901363//heterocyclic compound binding	GO:0009987//cellular process;GO:0071704//organic substance metabolic process;GO:0044238//primary metabolic process;GO:0034641//cellular nitrogen compound metabolic process;GO:0006139//nucleobase-containing compound metabolic process;GO:0009058//biosynthetic process;GO:0006725//cellular aromatic compound metabolic process;GO:0008150//biological_process;GO:0044237//cellular metabolic process;GO:190…
Bra005212	16.19	23.5833	0.542665	no	20.57	45.82	1.15544	yes	28.0533	16.5733	-0.759308	no	-	AT2G37220 (E=1e-097) | 29 kDa ribonucleoprotein, chloroplast, putative / RNA-binding protein cp29, putative	-	-	-	-	-	GO:1901265//nucleoside phosphate binding;GO:0000166//nucleotide binding;GO:0003674//molecular_function;GO:0036094//small molecule binding;GO:0003676//nucleic acid binding;GO:0005488//binding;GO:1901363//heterocyclic compound binding;GO:0097159//organic cyclic compound binding	-
Bra005221	23.0067	14.6067	-0.655425	no	456.64	28.1133	-4.02173	yes	57.4667	32.7967	-0.809176	no	-	AT2G37040 (E=6e-113) pal1, ATPAL1 | pal1 (Phe ammonia lyase 1); phenylalanine ammonia-lyase	Metabolism	Amino acid metabolism;Biosynthesis of other secondary metabolites	ko00940//Phenylpropanoid biosynthesis;ko00360//Phenylalanine metabolism	K10775	-	GO:0003674//molecular_function;GO:0003824//catalytic activity	GO:0009058//biosynthetic process;GO:0008152//metabolic process;GO:0008150//biological_process
Bra005227	0.001	0.03	4.90689	no	0.47	0.646667	0.460361	no	0.8	2.97	1.89239	yes	-	AT2G36970 (E=4e-255) | UDP-glucoronosyl/UDP-glucosyl transferase family protein	-	-	-	-	-	GO:0003674//molecular_function;GO:0016740//transferase activity;GO:0003824//catalytic activity	GO:0008150//biological_process;GO:0008152//metabolic process
Bra005229	0.0566667	0.001	-5.82443	no	0.463333	0.001	-8.85591	yes	30.3067	29.99	-0.0151537	no	-	AT2G36970 (E=8e-247) | UDP-glucoronosyl/UDP-glucosyl transferase family protein	-	-	-	-	-	GO:0016740//transferase activity;GO:0003824//catalytic activity;GO:0003674//molecular_function	GO:0008152//metabolic process;GO:0008150//biological_process
Bra005231	0.133333	0.326667	1.29278	no	0.393333	0.45	0.194173	no	0.973333	0.163333	-2.57511	yes	-	AT2G36950 (E=3e-106) | heavy-metal-associated domain-containing protein	-	-	-	-	-	GO:0005488//binding;GO:0003674//molecular_function	GO:0051179//localization;GO:0006810//transport;GO:0008150//biological_process;GO:0051234//establishment of localization
Bra005232	28.83	16.8467	-0.775108	no	35.01	23.8567	-0.553375	no	17.1333	6.28	-1.44797	yes	-	AT2G36930 (E=3e-054) | zinc finger (C2H2 type) family protein	-	-	-	-	-	GO:0097159//organic cyclic compound binding;GO:0003674//molecular_function;GO:0005488//binding;GO:1901363//heterocyclic compound binding;GO:0003676//nucleic acid binding	-
Bra005235	19.37	11.3833	-0.766901	no	5.05	8.74	0.79135	no	0.0966667	3.46667	5.16439	yes	-	AT2G36885 (E=7e-085) | unknown protein	-	-	-	-	GO:0005623//cell;GO:0044464//cell part;GO:0005575//cellular_component;GO:0016020//membrane;GO:0071944//cell periphery;GO:0005886//plasma membrane	-	-
Bra005241	38.3433	5.91	-2.69775	yes	8.05333	6.60333	-0.286392	no	19.6767	17.3967	-0.177675	no	-	AT2G36800 (E=7e-240) DOGT1, UGT73C5 | DOGT1 (DON-GLUCOSYLTRANSFERASE 1); UDP-glycosyltransferase/ cis-zeatin O-beta-D-glucosyltransferase/ glucosyltransferase/ quercetin 4'-O-glucosyltransferase/ quercetin 7-O-glucosyltransferase/ trans-zeatin O-beta-D-glucosyltransferase/ transferase, transf	-	-	-	-	-	GO:0003824//catalytic activity;GO:0016740//transferase activity;GO:0003674//molecular_function	GO:0008150//biological_process;GO:0008152//metabolic process
Bra005242	0.001	2.37	11.2107	yes	0.001	0.72	9.49185	yes	0.001	0.803333	9.64985	yes	-	AT2G36800 (E=5e-244) DOGT1, UGT73C5 | DOGT1 (DON-GLUCOSYLTRANSFERASE 1); UDP-glycosyltransferase/ cis-zeatin O-beta-D-glucosyltransferase/ glucosyltransferase/ quercetin 4'-O-glucosyltransferase/ quercetin 7-O-glucosyltransferase/ trans-zeatin O-beta-D-glucosyltransferase/ transferase, transf	-	-	-	-	-	GO:0003824//catalytic activity;GO:0016740//transferase activity;GO:0003674//molecular_function	GO:0008150//biological_process;GO:0008152//metabolic process
Bra005243	2.89667	0.323333	-3.1633	yes	0.743333	0.001	-9.53787	yes	1.03333	0.001	-10.0131	yes	-	AT2G36770 (E=4e-209) | UDP-glucoronosyl/UDP-glucosyl transferase family protein	-	-	-	-	-	GO:0016740//transferase activity;GO:0003674//molecular_function;GO:0003824//catalytic activity	GO:0008150//biological_process;GO:0008152//metabolic process
Bra005245	0.103333	0.246667	1.25526	no	0.0733333	0.001	-6.1964	no	4.13	0.106667	-5.27496	yes	-	AT2G36780 (E=3e-241) | UDP-glucoronosyl/UDP-glucosyl transferase family protein	-	-	-	-	-	GO:0016740//transferase activity;GO:0003824//catalytic activity;GO:0003674//molecular_function	GO:0008150//biological_process;GO:0008152//metabolic process
Bra005257	4.65	2.81333	-0.72495	no	5.3	3.18	-0.736966	no	3.97667	1.54333	-1.36551	yes	-	AT2G36630 (E=2e-187) | unknown protein	-	-	-	-	GO:0005575//cellular_component;GO:0016020//membrane	-	-
Bra005267	2.71	11.01	2.02245	yes	6.16	13.5533	1.13765	no	2.00333	5.10333	1.34904	yes	-	-	-	-	-	-	-	-	-
Bra005282	5.30667	27.9733	2.39817	yes	5.29333	32.9833	2.63949	yes	4.54	2.83667	-0.678496	no	-	AT2G36320 (E=1e-065) | zinc finger (AN1-like) family protein	-	-	-	-	-	GO:0003676//nucleic acid binding;GO:0003677//DNA binding;GO:1901363//heterocyclic compound binding;GO:0003674//molecular_function;GO:0005488//binding;GO:0097159//organic cyclic compound binding	-
Bra005301	0.106667	1.74	4.02791	yes	1.24	0.47	-1.39961	no	3.61	1.27667	-1.49962	no	-	AT2G36080 (E=1e-091) | DNA-binding protein, putative	-	-	-	-	GO:0043231//intracellular membrane-bounded organelle;GO:0044424//intracellular part;GO:0043226//organelle;GO:0005634//nucleus;GO:0005575//cellular_component;GO:0043229//intracellular organelle;GO:0044464//cell part;GO:0005623//cell;GO:0005622//intracellular;GO:0043227//membrane-bounded organelle	GO:0003676//nucleic acid binding;GO:0003677//DNA binding;GO:1901363//heterocyclic compound binding;GO:0005488//binding;GO:0003674//molecular_function;GO:0097159//organic cyclic compound binding	GO:0006725//cellular aromatic compound metabolic process;GO:0071704//organic substance metabolic process;GO:0009987//cellular process;GO:0046483//heterocycle metabolic process;GO:0008150//biological_process;GO:0044238//primary metabolic process;GO:1901360//organic cyclic compound metabolic process;GO:0044237//cellular metabolic process;GO:0008152//metabolic process;GO:0006139//nucleobase-containi…
Bra005306	20.4767	42.7467	1.06183	yes	47.94	81.85	0.771753	no	6.25	15.6667	1.32577	yes	-	-	-	-	-	-	-	-	-
Bra005312	3.76333	7.37	0.969654	no	14.74	5.57667	-1.40226	yes	0.65	8.5	3.70895	yes	-	AT2G35710 (E=2e-261) | glycogenin glucosyltransferase (glycogenin)-related	-	-	-	-	-	GO:0003674//molecular_function;GO:0003824//catalytic activity;GO:0016740//transferase activity	-
Bra005314	4.52	12.75	1.4961	yes	7.18333	24.64	1.77828	yes	0.17	0.236667	0.477322	no	-	AT2G35700 (E=4e-068) ATERF38, ERF38 | ERF38 (ERF FAMILY PROTEIN 38); DNA binding / transcription factor	-	-	-	-	GO:0005634//nucleus;GO:0043226//organelle;GO:0043229//intracellular organelle;GO:0005575//cellular_component;GO:0005623//cell;GO:0043227//membrane-bounded organelle;GO:0005622//intracellular;GO:0044464//cell part;GO:0043231//intracellular membrane-bounded organelle;GO:0044424//intracellular part	GO:0003677//DNA binding;GO:0005488//binding;GO:0003674//molecular_function;GO:0003700//transcription factor activity, sequence-specific DNA binding;GO:1901363//heterocyclic compound binding;GO:0001071//nucleic acid binding transcription factor activity;GO:0097159//organic cyclic compound binding;GO:0003676//nucleic acid binding	GO:0044238//primary metabolic process;GO:0009987//cellular process;GO:0006725//cellular aromatic compound metabolic process;GO:0044237//cellular metabolic process;GO:1901360//organic cyclic compound metabolic process;GO:0008150//biological_process;GO:0006807//nitrogen compound metabolic process;GO:0009058//biosynthetic process;GO:0046483//heterocycle metabolic process;GO:0071704//organic substanc…
Bra005321	0.533333	0.001	-9.05889	yes	0.726667	0.173333	-2.06774	no	0.166667	0.001	-7.38082	no	-	AT2G35615 (E=9e-197) | aspartyl protease family protein	-	-	-	-	-	GO:0003674//molecular_function;GO:0016787//hydrolase activity;GO:0003824//catalytic activity	GO:0008152//metabolic process;GO:0043170//macromolecule metabolic process;GO:0019538//protein metabolic process;GO:0008150//biological_process;GO:0071704//organic substance metabolic process;GO:0044238//primary metabolic process
Bra005333	0.001	1.06333	10.0544	no	0.001	4.6	12.1674	yes	0.001	5.50333	12.4261	yes	-	-	-	-	-	-	-	-	-
Bra005336	0.666667	1.33	0.996389	no	0.393333	1.26333	1.68341	no	0.6	2.15667	1.84577	yes	-	AT2G35510 (E=4e-111) SRO1 | SRO1 (SIMILAR TO RCD ONE 1); NAD+ ADP-ribosyltransferase	-	-	-	-	-	GO:0016740//transferase activity;GO:0003674//molecular_function;GO:0003824//catalytic activity	-
Bra005338	13.6233	1.29667	-3.3932	yes	13.15	1.97667	-2.73392	yes	2.06333	0.506667	-2.02587	yes	-	-	-	-	-	-	-	-	-
Bra005341	0.11	8.53667	6.2781	yes	0.133333	10.8833	6.35094	yes	0.283333	2.73333	3.27009	yes	-	AT2G35450 (E=5e-173) | catalytic/ hydrolase	-	-	-	-	GO:0005623//cell;GO:0044424//intracellular part;GO:0005622//intracellular;GO:0043229//intracellular organelle;GO:0005575//cellular_component;GO:0005737//cytoplasm;GO:0044444//cytoplasmic part;GO:0043231//intracellular membrane-bounded organelle;GO:0043227//membrane-bounded organelle;GO:0043226//organelle;GO:0009536//plastid;GO:0044464//cell part	GO:0003824//catalytic activity;GO:0016787//hydrolase activity;GO:0003674//molecular_function	GO:0008152//metabolic process;GO:0008150//biological_process
Bra005348	11.47	13.8133	0.268196	no	8.09333	15.3367	0.922179	no	3.44667	8.2	1.25042	yes	-	AT2G35360 (E=8e-100) | ubiquitin family protein	-	-	-	-	-	GO:0003674//molecular_function;GO:0005515//protein binding;GO:0005488//binding	-
Bra005350	6.6	17.6567	1.41968	yes	41.83	52.7133	0.33363	no	8.08333	9.15333	0.179347	no	-	AT2G35350 (E=2e-142) PLL1 | PLL1 (POLTERGEIST LIKE 1); catalytic/ protein serine/threonine phosphatase	-	-	-	-	-	GO:0016787//hydrolase activity;GO:0003824//catalytic activity;GO:0003674//molecular_function	GO:0044238//primary metabolic process;GO:0044237//cellular metabolic process;GO:0044260//cellular macromolecule metabolic process;GO:0044267//cellular protein metabolic process;GO:0019538//protein metabolic process;GO:0036211//protein modification process;GO:0043412//macromolecule modification;GO:0043170//macromolecule metabolic process;GO:0008150//biological_process;GO:0071704//organic substance…
Bra005374	0.213333	1.88667	3.14466	yes	0.35	1.46	2.06054	no	0.28	1.32333	2.24068	yes	-	AT2G35000 (E=5e-108) | zinc finger (C3HC4-type RING finger) family protein	-	-	-	-	-	GO:0003674//molecular_function;GO:0005515//protein binding;GO:0005488//binding;GO:0003824//catalytic activity;GO:0016740//transferase activity	GO:0044763//single-organism cellular process;GO:0019538//protein metabolic process;GO:0032501//multicellular organismal process;GO:0044237//cellular metabolic process;GO:0006464//cellular protein modification process;GO:0043170//macromolecule metabolic process;GO:0009605//response to external stimulus;GO:0044267//cellular protein metabolic process;GO:0048856//anatomical structure development;GO:0…
Bra005375	15.2267	6.40333	-1.24971	yes	17.07	3.64	-2.22945	yes	0.0366667	0.0833333	1.18442	no	-	AT2G34990 (E=4e-071) | zinc finger (C3HC4-type RING finger) family protein	-	-	-	-	-	GO:0005488//binding;GO:0003674//molecular_function;GO:0005515//protein binding	GO:0006810//transport;GO:0051234//establishment of localization;GO:0051179//localization;GO:0008150//biological_process
Bra005376	4.57333	3.70667	-0.303124	no	8.08667	6.05333	-0.417815	no	1.88667	5	1.40609	yes	SETH1	AT2G34980 (E=4e-112) SETH1 | SETH1; phosphatidylinositol N-acetylglucosaminyltransferase/ transferase	Metabolism	Glycan biosynthesis and metabolism	ko00563//Glycosylphosphatidylinositol(GPI)-anchor biosynthesis	K03859	GO:0043226//organelle;GO:0016020//membrane;GO:0043227//membrane-bounded organelle;GO:0043229//intracellular organelle;GO:0044424//intracellular part;GO:0005622//intracellular;GO:0012505//endomembrane system;GO:0005737//cytoplasm;GO:0005623//cell;GO:0044444//cytoplasmic part;GO:0044464//cell part;GO:0005575//cellular_component;GO:0043231//intracellular membrane-bounded organelle;GO:0005783//endopl…	GO:0003674//molecular_function;GO:0016740//transferase activity;GO:0003824//catalytic activity	GO:0009856//pollination;GO:0071704//organic substance metabolic process;GO:0044260//cellular macromolecule metabolic process;GO:0022414//reproductive process;GO:0044703//multi-organism reproductive process;GO:0044767//single-organism developmental process;GO:0044238//primary metabolic process;GO:0000003//reproduction;GO:0040007//growth;GO:0008150//biological_process;GO:0016049//cell growth;GO:003…
Bra005378	4.08333	4.65667	0.18955	no	2.35667	2.99667	0.346611	no	1.86	5.57	1.58237	yes	-	AT2G34930 (E=0.0) | disease resistance family protein	-	-	-	-	-	GO:0005488//binding;GO:0003674//molecular_function;GO:0005515//protein binding	-
Bra005381	1.45	0.303333	-2.25708	yes	0.376667	0.07	-2.42786	no	0.09	0.001	-6.49185	no	-	AT2G34920 (E=9e-191) EDA18 | EDA18 (embryo sac development arrest 18); protein binding / zinc ion binding	-	-	-	-	-	GO:0003674//molecular_function;GO:0005515//protein binding;GO:0005488//binding	-
Bra005384	53.16	25.62	-1.05307	yes	51.51	22.5833	-1.18959	yes	0.593333	0.853333	0.524267	no	-	AT2G34890 (E=1e-279) | CTP synthase, putative / UTP--ammonia ligase, putative	Metabolism	Nucleotide metabolism	ko00240//Pyrimidine metabolism	K01937	-	GO:0003674//molecular_function;GO:0005488//binding;GO:0003824//catalytic activity;GO:0036094//small molecule binding;GO:0097159//organic cyclic compound binding;GO:1901265//nucleoside phosphate binding;GO:0000166//nucleotide binding;GO:1901363//heterocyclic compound binding	GO:0008150//biological_process;GO:1901360//organic cyclic compound metabolic process;GO:0046483//heterocycle metabolic process;GO:0006139//nucleobase-containing compound metabolic process;GO:0008152//metabolic process;GO:0009987//cellular process;GO:0044238//primary metabolic process;GO:0071704//organic substance metabolic process;GO:0006725//cellular aromatic compound metabolic process;GO:004423…
Bra005387	9.62	3.50667	-1.45594	yes	10.03	3.91667	-1.35662	no	7.20333	2.29	-1.65332	yes	MEE25	AT1G30620 (E=4e-210) HSR8, MUR4, UXE1 | MUR4 (MURUS 4); UDP-arabinose 4-epimerase/ catalytic	Metabolism	Carbohydrate metabolism	ko00520//Amino sugar and nucleotide sugar metabolism	K12448	-	GO:0003824//catalytic activity;GO:0005488//binding;GO:0003674//molecular_function	GO:0044238//primary metabolic process;GO:0008150//biological_process;GO:0009987//cellular process;GO:0005975//carbohydrate metabolic process;GO:0008152//metabolic process;GO:0071704//organic substance metabolic process
Bra005390	1.14	0.0833333	-3.774	yes	0.09	0.001	-6.49185	no	0.776667	0.63	-0.301944	no	-	AT2G34810 (E=2e-279) | FAD-binding domain-containing protein	-	-	-	-	-	GO:0036094//small molecule binding;GO:1901265//nucleoside phosphate binding;GO:0003824//catalytic activity;GO:1901363//heterocyclic compound binding;GO:0003674//molecular_function;GO:0005488//binding;GO:0097159//organic cyclic compound binding;GO:0000166//nucleotide binding	GO:0008150//biological_process;GO:0008152//metabolic process
Bra005392	0.366667	0.233333	-0.652077	no	2.51667	3.75	0.575376	no	26.2233	3.61667	-2.85812	yes	-	AT2G34790 (E=3e-273) MEE23, EDA28 | MEE23 (MATERNAL EFFECT EMBRYO ARREST 23); FAD binding / catalytic/ electron carrier/ oxidoreductase	-	-	-	-	GO:0044464//cell part;GO:0005575//cellular_component;GO:0071944//cell periphery;GO:0030312//external encapsulating structure;GO:0005623//cell;GO:0005618//cell wall	GO:1901265//nucleoside phosphate binding;GO:1901363//heterocyclic compound binding;GO:0003674//molecular_function;GO:0005488//binding;GO:0036094//small molecule binding;GO:0003824//catalytic activity;GO:0000166//nucleotide binding;GO:0097159//organic cyclic compound binding	GO:0044707//single-multicellular organism process;GO:0016043//cellular component organization;GO:0008152//metabolic process;GO:0032502//developmental process;GO:0044767//single-organism developmental process;GO:0008150//biological_process;GO:0048856//anatomical structure development;GO:0048869//cellular developmental process;GO:0007275//multicellular organism development;GO:0044763//single-organi…
Bra005394	0.0566667	2.27	5.32405	yes	3.57	5.08667	0.510796	no	0.0966667	0.001	-6.59495	no	FAH1	AT2G34770 (E=1e-126) FAH1 | FAH1 (FATTY ACID HYDROXYLASE 1); catalytic/ fatty acid alpha-hydroxylase	-	-	-	-	-	GO:0003674//molecular_function;GO:0003824//catalytic activity;GO:0005488//binding	GO:0044710//single-organism metabolic process;GO:0016265//death;GO:0008150//biological_process;GO:0071704//organic substance metabolic process;GO:0044238//primary metabolic process;GO:0006629//lipid metabolic process;GO:0051234//establishment of localization;GO:0044699//single-organism process;GO:0044763//single-organism cellular process;GO:0006810//transport;GO:0008219//cell death;GO:0009987//ce…
Bra005396	4.44333	3.83667	-0.211789	no	4.73333	3.18667	-0.570808	no	0.863333	2.30333	1.41573	yes	-	-	-	-	-	-	-	-	-
Bra005398	0.253333	0.473333	0.90182	no	3.48	9.85667	1.50201	yes	8.67	10.5433	0.282227	no	-	AT2G34710 (E=0.0) PHB, ATHB14, ATHB-14, PHB-1D | PHB (PHABULOSA); DNA binding / transcription factor	-	-	-	-	GO:0044424//intracellular part;GO:0043227//membrane-bounded organelle;GO:0043226//organelle;GO:0043229//intracellular organelle;GO:0005634//nucleus;GO:0044464//cell part;GO:0005623//cell;GO:0005575//cellular_component;GO:0043231//intracellular membrane-bounded organelle;GO:0005622//intracellular	GO:0097159//organic cyclic compound binding;GO:1901363//heterocyclic compound binding;GO:0003700//transcription factor activity, sequence-specific DNA binding;GO:0003676//nucleic acid binding;GO:0008289//lipid binding;GO:0003677//DNA binding;GO:0003674//molecular_function;GO:0005488//binding;GO:0001071//nucleic acid binding transcription factor activity	GO:1901360//organic cyclic compound metabolic process;GO:0046483//heterocycle metabolic process;GO:0044237//cellular metabolic process;GO:0006139//nucleobase-containing compound metabolic process;GO:0034641//cellular nitrogen compound metabolic process;GO:0071704//organic substance metabolic process;GO:0006725//cellular aromatic compound metabolic process;GO:0008150//biological_process;GO:0008152…
Bra005399	1.68	0.06	-4.80735	yes	12.3133	0.001	-13.5879	yes	194.397	0.513333	-8.56489	yes	-	AT2G34700 (E=5e-079) | pollen Ole e 1 allergen and extensin family protein	-	-	-	-	-	GO:0003674//molecular_function;GO:0005198//structural molecule activity	-
Bra005400	2.82	0.001	-11.4615	yes	2.60667	0.0233333	-6.80367	yes	0.0666667	0.001	-6.05889	no	-	AT1G58260 (E=2e-221) CYP79C2, CYP79C3P | CYP79C2 (CYTOCHROME P450 79C2); electron carrier/ heme binding / iron ion binding / monooxygenase/ oxygen binding	-	-	-	-	-	GO:0003674//molecular_function;GO:0003824//catalytic activity;GO:0005488//binding	GO:0008152//metabolic process;GO:0008150//biological_process
Bra005409	5.83333	0.166667	-5.12928	yes	4.55667	0.466667	-3.28751	yes	1.19	0.14	-3.08746	yes	-	-	-	-	-	-	-	-	-
Bra005410	4.33333	0.926667	-2.22535	yes	2.89333	1.18667	-1.28582	no	0.633333	0.0733333	-3.11042	yes	-	AT4G38940 (E=5e-073) | kelch repeat-containing F-box family protein	-	-	-	-	-	GO:0005488//binding;GO:0005515//protein binding;GO:0003674//molecular_function	-
Bra005411	1.70333	0.296667	-2.52145	yes	0.96	0.696667	-0.462566	no	0.26	0.001	-8.02237	no	-	AT4G38940 (E=1e-074) | kelch repeat-containing F-box family protein	-	-	-	-	-	GO:0003674//molecular_function;GO:0005515//protein binding;GO:0005488//binding	-
Bra005417	0.183333	0.206667	0.172837	no	0.176667	0.001	-7.46489	no	0.001	1.51667	10.5667	yes	-	-	-	-	-	-	-	-	-
Bra005420	1.12333	8.11667	2.8531	yes	2.4	14.1967	2.56445	yes	0.0233333	0.07	1.58496	no	-	AT2G34500 (E=2e-226) CYP710A1 | CYP710A1 (cytochrome P450, family 710, subfamily A, polypeptide 1); C-22 sterol desaturase/ oxygen binding	Metabolism	Lipid metabolism	ko00100//Steroid biosynthesis	K09832	-	GO:0003674//molecular_function;GO:0003824//catalytic activity;GO:0005488//binding	GO:0008150//biological_process;GO:0008152//metabolic process
Bra005423	2.41667	0.58	-2.05889	yes	4.59667	3.64667	-0.33401	no	1.74	0.0766667	-4.50434	yes	-	AT2G34420 (E=8e-101) LHB1B2, LHCB1.5 | LHB1B2; chlorophyll binding	Metabolism	Energy metabolism	ko00196//Photosynthesis - antenna proteins	K08912	GO:0005623//cell;GO:0005622//intracellular;GO:0044444//cytoplasmic part;GO:0009579//thylakoid;GO:0043226//organelle;GO:0009536//plastid;GO:0044424//intracellular part;GO:0005575//cellular_component;GO:0005737//cytoplasm;GO:0043229//intracellular organelle;GO:0016020//membrane;GO:0043227//membrane-bounded organelle;GO:0044464//cell part;GO:0043231//intracellular membrane-bounded organelle	GO:0003676//nucleic acid binding;GO:1901363//heterocyclic compound binding;GO:0003674//molecular_function;GO:0008135//translation factor activity, RNA binding;GO:0097159//organic cyclic compound binding;GO:0005488//binding;GO:0003723//RNA binding	GO:0044267//cellular protein metabolic process;GO:0009058//biosynthetic process;GO:0006412//translation;GO:0008150//biological_process;GO:0043412//macromolecule modification;GO:0006807//nitrogen compound metabolic process;GO:1901576//organic substance biosynthetic process;GO:0044237//cellular metabolic process;GO:0006518//peptide metabolic process;GO:0019538//protein metabolic process;GO:0008152/…
Bra005424	45.85	35.65	-0.36302	no	108.187	24.7133	-2.13016	yes	3.04	0.816667	-1.89625	yes	-	AT2G34430 (E=1e-089) LHB1B1, LHCB1.4 | LHB1B1; chlorophyll binding	Metabolism	Energy metabolism	ko00196//Photosynthesis - antenna proteins	K08912	GO:0009536//plastid;GO:0005737//cytoplasm;GO:0043229//intracellular organelle;GO:0016020//membrane;GO:0043226//organelle;GO:0044464//cell part;GO:0005622//intracellular;GO:0005575//cellular_component;GO:0009579//thylakoid;GO:0043231//intracellular membrane-bounded organelle;GO:0044424//intracellular part;GO:0043227//membrane-bounded organelle;GO:0005623//cell;GO:0044444//cytoplasmic part	GO:0005488//binding;GO:0003674//molecular_function	GO:0044237//cellular metabolic process;GO:0015979//photosynthesis;GO:0044267//cellular protein metabolic process;GO:0071704//organic substance metabolic process;GO:0043412//macromolecule modification;GO:0044238//primary metabolic process;GO:0044260//cellular macromolecule metabolic process;GO:0043170//macromolecule metabolic process;GO:0036211//protein modification process;GO:0006091//generation …
Bra005425	7.94	224.563	4.82184	yes	17.9633	325.657	4.18022	yes	0.383333	30.5133	6.3147	yes	-	AT2G34430 (E=2e-149) LHB1B1, LHCB1.4 | LHB1B1; chlorophyll binding	Metabolism	Energy metabolism	ko00196//Photosynthesis - antenna proteins	K08912	GO:0044444//cytoplasmic part;GO:0043229//intracellular organelle;GO:0005575//cellular_component;GO:0043227//membrane-bounded organelle;GO:0009536//plastid;GO:0009579//thylakoid;GO:0044424//intracellular part;GO:0043231//intracellular membrane-bounded organelle;GO:0016020//membrane;GO:0005737//cytoplasm;GO:0043226//organelle;GO:0044464//cell part;GO:0005623//cell;GO:0005622//intracellular	GO:0005488//binding;GO:0003674//molecular_function	GO:0006091//generation of precursor metabolites and energy;GO:0006464//cellular protein modification process;GO:0015979//photosynthesis;GO:0043170//macromolecule metabolic process;GO:0044238//primary metabolic process;GO:0009987//cellular process;GO:0008150//biological_process;GO:0008152//metabolic process;GO:0044267//cellular protein metabolic process;GO:0043412//macromolecule modification;GO:00…
Bra005438	370.497	182.783	-1.01933	yes	198.107	115.96	-0.77265	no	105.777	79.5867	-0.410423	no	-	AT2G34300 (E=0.0) | dehydration-responsive protein-related	-	-	-	-	GO:0012505//endomembrane system;GO:0005575//cellular_component;GO:0043229//intracellular organelle;GO:0043227//membrane-bounded organelle;GO:0005773//vacuole;GO:0044444//cytoplasmic part;GO:0005622//intracellular;GO:0044464//cell part;GO:0043226//organelle;GO:0005794//Golgi apparatus;GO:0005623//cell;GO:0005768//endosome;GO:0043231//intracellular membrane-bounded organelle;GO:0005737//cytoplasm;G…	GO:0003674//molecular_function;GO:0003824//catalytic activity;GO:0016740//transferase activity	GO:0008150//biological_process;GO:0008152//metabolic process
[truncated: 4,244 more rows]
