# Supplementary material for: Comparative transcriptome and flavonoids components analysis reveal the structural genes responsible for the yellow seed coat color of Brassica rapa L
Source: PeerJ. 2021 Mar 4;9:e10770. doi: 10.7717/peerj.10770 (PMC7937345; doi:10.7717/peerj.10770)
Supplement: Supplemental Information 11 [file peerj-09-10770-s011.xlsx]

## Sheet: Addition file 1
id	B147-10_count	B80-10_count	B147-10_fpkm	B80-10_fpkm	log2(FC)	Pvalue	FDR	significant	Description	GO Component	GO Function	GO Process
Bra000046	60.3333	12.3333	7.77667	1.65333	-2.23377	6.09929e-05	0.0013023	yes	AT2G38250 (E=3e-073) | DNA-binding protein-related	GO:0043231//intracellular membrane-bounded organelle;GO:0005622//intracellular;GO:0044464//cell part;GO:0043227//membrane-bounded organelle;GO:0044424//intracellular part;GO:0005634//nucleus;GO:0043229//intracellular organelle;GO:0043226//organelle;GO:0005623//cell;GO:0005575//cellular_component	GO:0003677//DNA binding;GO:0003676//nucleic acid binding;GO:0003674//molecular_function;GO:1901363//heterocyclic compound binding;GO:0044877//macromolecular complex binding;GO:0003682//chromatin binding;GO:0005488//binding;GO:0001071//nucleic acid binding transcription factor activity;GO:0097159//organic cyclic compound binding;GO:0003700//transcription factor activity, sequence-specific DNA bind…	GO:0009058//biosynthetic process;GO:0044237//cellular metabolic process;GO:0006139//nucleobase-containing compound metabolic process;GO:0006725//cellular aromatic compound metabolic process;GO:0046483//heterocycle metabolic process;GO:0071704//organic substance metabolic process;GO:0008152//metabolic process;GO:0008150//biological_process;GO:0006807//nitrogen compound metabolic process;GO:0044238…
Bra000057	125.333	23	9.60333	1.82667	-2.39432	7.12938e-05	0.0014925	yes	-	-	-	-
Bra000064	543	189	44.5133	16.0467	-1.47196	1.90309e-05	0.000470194	yes	AT2G38470 (E=4e-154) WRKY33, ATWRKY33 | WRKY33; transcription factor	-	GO:0003674//molecular_function;GO:0005488//binding;GO:0003677//DNA binding;GO:0003700//transcription factor activity, sequence-specific DNA binding;GO:1901363//heterocyclic compound binding;GO:0003676//nucleic acid binding;GO:0001071//nucleic acid binding transcription factor activity;GO:0097159//organic cyclic compound binding	GO:0006807//nitrogen compound metabolic process;GO:0046483//heterocycle metabolic process;GO:0044238//primary metabolic process;GO:0008152//metabolic process;GO:0006725//cellular aromatic compound metabolic process;GO:0009987//cellular process;GO:0071704//organic substance metabolic process;GO:0034641//cellular nitrogen compound metabolic process;GO:0006139//nucleobase-containing compound metabol…
Bra000109	589	123.333	46.7867	9.57333	-2.289	1.00969e-16	1.29541e-14	yes	AT2G38995 (E=2e-193) | FUNCTIONS IN: molecular_function unknown; INVOLVED IN: biological_process unknown; LOCATED IN: cellular_component unknown; CONTAINS InterPro DOMAIN/s: Protein of unknown function DUF1298 (InterPro:IPR009721), Uncharacterised protein family UPF0089 (InterPro:IPR004255); BEST Arabidopsis thaliana protein match is: WSD1; diacylglycerol O-acyltransferase/ long-chain-alcohol O-f…	-	GO:0003824//catalytic activity;GO:0003674//molecular_function;GO:0016740//transferase activity	GO:0044710//single-organism metabolic process;GO:0044699//single-organism process;GO:0006629//lipid metabolic process;GO:0071704//organic substance metabolic process;GO:0009058//biosynthetic process;GO:0008152//metabolic process;GO:0044238//primary metabolic process;GO:0008150//biological_process;GO:0009987//cellular process
Bra000137	9.66667	81	1.76333	14.1033	2.99966	3.60064e-12	2.91944e-10	yes	AT1G73260 (E=7e-037) | trypsin and protease inhibitor family protein / Kunitz family protein	-	GO:0003674//molecular_function;GO:0098772//molecular function regulator;GO:0030234//enzyme regulator activity	GO:0019538//protein metabolic process;GO:0008150//biological_process;GO:0044238//primary metabolic process;GO:0009987//cellular process;GO:0043170//macromolecule metabolic process;GO:0008152//metabolic process;GO:0071704//organic substance metabolic process
Bra000161	215	85.6667	37.6267	15.0067	-1.32615	0.000696757	0.0103721	yes	AT2G40020 (E=4e-008) | FUNCTIONS IN: molecular_function unknown; INVOLVED IN: biological_process unknown; LOCATED IN: cellular_component unknown; EXPRESSED IN: 22 plant structures; EXPRESSED DURING: 13 growth stages; CONTAINS InterPro DOMAIN/s: WIYLD domain (InterPro:IPR018848); BEST Arabidopsis thaliana protein match is: unknown protein (TAIR:AT1G45248.5); Has 5859 Blast hits to 3090 proteins in…	-	GO:0016740//transferase activity;GO:0003824//catalytic activity;GO:0003674//molecular_function	GO:0044237//cellular metabolic process;GO:0044260//cellular macromolecule metabolic process;GO:0019538//protein metabolic process;GO:0036211//protein modification process;GO:0009987//cellular process;GO:0016043//cellular component organization;GO:0044238//primary metabolic process;GO:0008150//biological_process;GO:0071840//cellular component organization or biogenesis;GO:0006464//cellular protein…
Bra000205	18.6667	5	2.14667	0.55	-1.96459	0.00129577	0.0172482	yes	AT2G40815 (E=9e-050) | FUNCTIONS IN: molecular_function unknown; INVOLVED IN: biological_process unknown; LOCATED IN: cellular_component unknown; CONTAINS InterPro DOMAIN/s: C2 calcium-dependent membrane targeting (InterPro:IPR000008).	-	GO:0003674//molecular_function;GO:0005515//protein binding;GO:0005488//binding	-
Bra000265	37.6667	4	11.6333	1.25333	-3.21442	3.77536e-05	0.000858418	yes	-	-	-	-
Bra000267	101.333	42.3333	5.94667	2.40333	-1.30704	0.00015075	0.00284962	yes	AT2G42580 (E=2e-297) TTL3, VIT | TTL3 (TETRATRICOPETIDE-REPEAT THIOREDOXIN-LIKE 3); binding / protein binding	-	GO:0005515//protein binding;GO:0003674//molecular_function;GO:0005488//binding	GO:0065007//biological regulation;GO:0008150//biological_process;GO:0019725//cellular homeostasis;GO:0065008//regulation of biological quality;GO:0044699//single-organism process;GO:0044763//single-organism cellular process;GO:0009987//cellular process;GO:0042592//homeostatic process
Bra000310	4.33333	34.3333	0.616667	4.53	2.87695	7.36287e-06	0.000203825	yes	AT2G43570 (E=5e-106) | chitinase, putative	-	GO:0003824//catalytic activity;GO:0003674//molecular_function;GO:0005488//binding;GO:0016787//hydrolase activity	GO:0009987//cellular process;GO:0071704//organic substance metabolic process;GO:0009056//catabolic process;GO:0005975//carbohydrate metabolic process;GO:0008152//metabolic process;GO:0008150//biological_process;GO:0044238//primary metabolic process
Bra000369	10	0	1.67333	0.001	-10.7085	0.000128823	0.00247764	yes	AT2G45080 (E=2e-117) cycp3;1 | cycp3;1 (cyclin p3;1); cyclin-dependent protein kinase	-	GO:0003674//molecular_function;GO:0005488//binding;GO:0005515//protein binding	GO:0044699//single-organism process;GO:0009987//cellular process;GO:0006464//cellular protein modification process;GO:0008150//biological_process;GO:0044237//cellular metabolic process;GO:0044763//single-organism cellular process;GO:0044238//primary metabolic process;GO:0007049//cell cycle;GO:0019538//protein metabolic process;GO:0008152//metabolic process;GO:0044260//cellular macromolecule metab…
Bra000397	50	20	19.64	7.9	-1.31387	0.00235008	0.0281393	yes	AT2G45695 (E=8e-040) | FUNCTIONS IN: molecular_function unknown; INVOLVED IN: biological_process unknown; LOCATED IN: cellular_component unknown; CONTAINS InterPro DOMAIN/s: Ubiquitin related modifier 1 (InterPro:IPR015221), Ubiquitin-related modifier 1 (InterPro:IPR017188), Molybdopterin synthase/thiamin biosynthesis sulphur carrier, beta-grasp (InterPro:IPR016155); BEST Arabidopsis thaliana pro…	GO:0005622//intracellular;GO:0005623//cell;GO:0005575//cellular_component;GO:0005829//cytosol;GO:0044464//cell part;GO:0005737//cytoplasm;GO:0044424//intracellular part;GO:0044444//cytoplasmic part	-	GO:0006807//nitrogen compound metabolic process;GO:0044238//primary metabolic process;GO:0006139//nucleobase-containing compound metabolic process;GO:0009987//cellular process;GO:0044267//cellular protein metabolic process;GO:0044237//cellular metabolic process;GO:0071704//organic substance metabolic process;GO:0044260//cellular macromolecule metabolic process;GO:0036211//protein modification pro…
Bra000469	26.3333	98.3333	0.736667	2.62	1.83048	3.74676e-05	0.000853738	yes	AT2G29940 (E=0.0) PDR3, ATPDR3 | PDR3 (PLEIOTROPIC DRUG RESISTANCE 3); ATPase, coupled to transmembrane movement of substances	GO:0005575//cellular_component;GO:0016020//membrane	GO:0003674//molecular_function;GO:0000166//nucleotide binding;GO:0003824//catalytic activity;GO:1901265//nucleoside phosphate binding;GO:0005488//binding;GO:0036094//small molecule binding;GO:1901363//heterocyclic compound binding;GO:0097159//organic cyclic compound binding;GO:0016787//hydrolase activity	-
Bra000474	1542	580	268.88	99.0867	-1.4402	3.79661e-10	2.36888e-08	yes	AT2G29450 (E=7e-115) ATGSTU5, ATGSTU1, AT103-1A | ATGSTU5 (ARABIDOPSIS THALIANA GLUTATHIONE S-TRANSFERASE TAU 5); glutathione binding / glutathione transferase	-	GO:0005488//binding;GO:0003674//molecular_function;GO:0005515//protein binding	-
Bra000508	232	617	22.9833	60.6467	1.39984	1.56513e-07	6.16518e-06	yes	AT2G27500 (E=4e-195) | glycosyl hydrolase family 17 protein	-	GO:0003824//catalytic activity;GO:0003674//molecular_function;GO:0016787//hydrolase activity	GO:0008150//biological_process;GO:0008152//metabolic process;GO:0071704//organic substance metabolic process;GO:0005975//carbohydrate metabolic process;GO:0044238//primary metabolic process
Bra000514	5.33333	0.333333	0.35	0.0233333	-3.90689	0.00295239	0.0338539	yes	AT1G46984 (E=2e-094) | F-box protein-related	-	GO:0003674//molecular_function;GO:0005515//protein binding;GO:0005488//binding	-
Bra000557	747	263	84.11	25.9867	-1.69451	6.69962e-05	0.00141178	yes	AT2G26150 (E=2e-155) ATHSFA2, HSFA2 | ATHSFA2; DNA binding / transcription factor	GO:0043229//intracellular organelle;GO:0044464//cell part;GO:0043231//intracellular membrane-bounded organelle;GO:0044424//intracellular part;GO:0043226//organelle;GO:0005623//cell;GO:0005575//cellular_component;GO:0005622//intracellular;GO:0005634//nucleus;GO:0043227//membrane-bounded organelle	GO:0001071//nucleic acid binding transcription factor activity;GO:0003700//transcription factor activity, sequence-specific DNA binding;GO:0003677//DNA binding;GO:0003676//nucleic acid binding;GO:0005488//binding;GO:1901363//heterocyclic compound binding;GO:0003674//molecular_function;GO:0097159//organic cyclic compound binding	GO:0019748//secondary metabolic process;GO:0044710//single-organism metabolic process;GO:0044238//primary metabolic process;GO:0009628//response to abiotic stimulus;GO:0071704//organic substance metabolic process;GO:0006950//response to stress;GO:0008152//metabolic process;GO:0050896//response to stimulus;GO:0034641//cellular nitrogen compound metabolic process;GO:0006725//cellular aromatic compo…
Bra000628	1995.33	5012.67	215.94	527.117	1.28749	3.44304e-10	2.17804e-08	yes	AT5G50750 (E=2e-209) RGP4 | RGP4 (REVERSIBLY GLYCOSYLATED POLYPEPTIDE 4); transferase, transferring hexosyl groups	GO:0005829//cytosol;GO:0005794//Golgi apparatus;GO:0043231//intracellular membrane-bounded organelle;GO:0005623//cell;GO:0044444//cytoplasmic part;GO:0043226//organelle;GO:0044464//cell part;GO:0005737//cytoplasm;GO:0005622//intracellular;GO:0044424//intracellular part;GO:0043227//membrane-bounded organelle;GO:0012505//endomembrane system;GO:0005575//cellular_component;GO:0043229//intracellular o…	GO:0003824//catalytic activity;GO:0003674//molecular_function	GO:0071704//organic substance metabolic process;GO:0009058//biosynthetic process;GO:0005975//carbohydrate metabolic process;GO:0044238//primary metabolic process;GO:0008150//biological_process;GO:0009987//cellular process;GO:0008152//metabolic process
Bra000630	309	45.6667	44.6967	6.49	-2.78388	1.50774e-05	0.000385331	yes	AT2G23580 (E=4e-112) ATMES4, MES4, ABE4 | MES4 (METHYL ESTERASE 4); hydrolase/ hydrolase, acting on ester bonds / methyl salicylate esterase	-	GO:0003824//catalytic activity;GO:0003674//molecular_function;GO:0016787//hydrolase activity	GO:0009607//response to biotic stimulus;GO:0006950//response to stress;GO:0009987//cellular process;GO:0008150//biological_process;GO:0008152//metabolic process;GO:0009605//response to external stimulus;GO:0050896//response to stimulus
Bra000631	5.66667	0	0.863333	0.001	-9.75377	0.000326327	0.00544378	yes	-	-	-	-
Bra000643	46.6667	15	15.7233	5.01667	-1.64811	0.00473557	0.0492456	yes	AT4G08230 (E=4e-038) | glycine-rich protein	-	-	GO:0044699//single-organism process;GO:0050896//response to stimulus;GO:0008150//biological_process;GO:0050789//regulation of biological process;GO:0044763//single-organism cellular process;GO:0023052//signaling;GO:0044700//single organism signaling;GO:0007154//cell communication;GO:0051716//cellular response to stimulus;GO:0065007//biological regulation;GO:0007165//signal transduction;GO:0009987…
Bra000686	54.3333	17	2.7	0.793333	-1.76696	0.00300979	0.0343518	yes	AT1G34300 (E=3e-254) | lectin protein kinase family protein	-	GO:0016740//transferase activity;GO:0036094//small molecule binding;GO:0005488//binding;GO:1901363//heterocyclic compound binding;GO:0000166//nucleotide binding;GO:0016301//kinase activity;GO:0003824//catalytic activity;GO:1901265//nucleoside phosphate binding;GO:0097159//organic cyclic compound binding;GO:0016772//transferase activity, transferring phosphorus-containing groups;GO:0003674//molecu…	GO:0044702//single organism reproductive process;GO:0044238//primary metabolic process;GO:0044703//multi-organism reproductive process;GO:0044237//cellular metabolic process;GO:0000003//reproduction;GO:0043170//macromolecule metabolic process;GO:0044763//single-organism cellular process;GO:0007154//cell communication;GO:0009856//pollination;GO:0044706//multi-multicellular organism process;GO:0071…
Bra000716	5	17.3333	0.633333	2.18667	1.7877	0.00397131	0.0430497	yes	AT1G32760 (E=8e-084) | glutaredoxin family protein	-	GO:0003674//molecular_function;GO:0003824//catalytic activity	GO:0019725//cellular homeostasis;GO:0044699//single-organism process;GO:0044763//single-organism cellular process;GO:0009987//cellular process;GO:0065007//biological regulation;GO:0042592//homeostatic process;GO:0008150//biological_process;GO:0065008//regulation of biological quality
Bra000732	5	0	0.553333	0.001	-9.11201	0.00119016	0.0161379	yes	AT4G11050 (E=9e-165) AtGH9C3 | AtGH9C3 (Arabidopsis thaliana glycosyl hydrolase 9C3); carbohydrate binding / catalytic/ hydrolase, hydrolyzing O-glycosyl compounds	-	GO:0003674//molecular_function;GO:0005488//binding;GO:0030246//carbohydrate binding;GO:0016787//hydrolase activity;GO:0003824//catalytic activity	GO:0009987//cellular process;GO:0044238//primary metabolic process;GO:0005975//carbohydrate metabolic process;GO:0008150//biological_process;GO:0008152//metabolic process;GO:0071704//organic substance metabolic process;GO:0009056//catabolic process
Bra000733	102	48	3.29333	1.50333	-1.13138	0.00272419	0.0317733	yes	-	-	-	-
Bra000735	32	0	2.45667	0.001	-11.2625	9.92276e-15	1.06373e-12	yes	AT1G64840 (E=4e-113) | F-box family protein	-	GO:0005515//protein binding;GO:0003674//molecular_function;GO:0005488//binding	-
Bra000754	5.66667	0	0.596667	0.001	-9.22078	0.000710452	0.0105269	yes	AT4G11890 (E=2e-136) | protein kinase family protein	-	GO:0005488//binding;GO:0016301//kinase activity;GO:0003824//catalytic activity;GO:1901265//nucleoside phosphate binding;GO:0003674//molecular_function;GO:0016772//transferase activity, transferring phosphorus-containing groups;GO:0097159//organic cyclic compound binding;GO:0016740//transferase activity;GO:1901363//heterocyclic compound binding;GO:0000166//nucleotide binding;GO:0036094//small mole…	GO:0009607//response to biotic stimulus;GO:0023052//signaling;GO:0065007//biological regulation;GO:0006464//cellular protein modification process;GO:0009605//response to external stimulus;GO:0036211//protein modification process;GO:0044260//cellular macromolecule metabolic process;GO:0007165//signal transduction;GO:0044238//primary metabolic process;GO:0006950//response to stress;GO:0050896//resp…
Bra000755	174.667	27.3333	24.7533	3.77	-2.71499	4.56402e-15	5.02766e-13	yes	AT4G11910 (E=5e-129) | INVOLVED IN: biological_process unknown; LOCATED IN: chloroplast; BEST Arabidopsis thaliana protein match is: NYE1 (NON-YELLOWING 1) (TAIR:AT4G22920.1); Has 130 Blast hits to 128 proteins in 45 species: Archae - 0; Bacteria - 50; Metazoa - 0; Fungi - 0; Plants - 78; Viruses - 0; Other Eukaryotes - 2 (source: NCBI BLink).	GO:0043229//intracellular organelle;GO:0044464//cell part;GO:0043227//membrane-bounded organelle;GO:0009536//plastid;GO:0009579//thylakoid;GO:0005623//cell;GO:0005737//cytoplasm;GO:0005575//cellular_component;GO:0043226//organelle;GO:0044444//cytoplasmic part;GO:0016020//membrane;GO:0044424//intracellular part;GO:0043231//intracellular membrane-bounded organelle;GO:0005622//intracellular	-	GO:0008150//biological_process;GO:0009987//cellular process;GO:0009056//catabolic process;GO:0008152//metabolic process
Bra000757	402	175	48.9233	20.72	-1.2395	2.29154e-06	7.05934e-05	yes	AT4G11960 (E=6e-135) PGRL1B | PGRL1B (PGR5-Like B)	GO:0043231//intracellular membrane-bounded organelle;GO:0005575//cellular_component;GO:0005623//cell;GO:0043229//intracellular organelle;GO:0043227//membrane-bounded organelle;GO:0009579//thylakoid;GO:0009536//plastid;GO:0005622//intracellular;GO:0016020//membrane;GO:0043226//organelle;GO:0044444//cytoplasmic part;GO:0044464//cell part;GO:0005737//cytoplasm;GO:0044424//intracellular part	-	GO:0009056//catabolic process;GO:0015979//photosynthesis;GO:0008150//biological_process;GO:0006091//generation of precursor metabolites and energy;GO:0008152//metabolic process;GO:0009987//cellular process;GO:0044237//cellular metabolic process
Bra000758	210.333	0	6.55	0.001	-12.6773	2.08043e-48	1.74899e-45	yes	AT4G12020 (E=2e-189) WRKY19, ATWRKY19, MAPKKK11 | WRKY19; transcription factor	-	GO:0000166//nucleotide binding;GO:0003674//molecular_function;GO:0097159//organic cyclic compound binding;GO:1901265//nucleoside phosphate binding;GO:0036094//small molecule binding;GO:1901363//heterocyclic compound binding;GO:0005515//protein binding;GO:0005488//binding	GO:0006950//response to stress;GO:0008150//biological_process;GO:0050896//response to stimulus
Bra000785	81.3333	181	9.66	20.4767	1.08389	0.000326511	0.00544401	yes	AT4G04020 (E=1e-129) FIB | FIB (FIBRILLIN); structural molecule	GO:0005575//cellular_component;GO:0044424//intracellular part;GO:0005623//cell;GO:0043231//intracellular membrane-bounded organelle;GO:0009536//plastid;GO:0044464//cell part;GO:0005622//intracellular;GO:0043226//organelle;GO:0043229//intracellular organelle;GO:0044444//cytoplasmic part;GO:0005737//cytoplasm;GO:0043227//membrane-bounded organelle	GO:0005198//structural molecule activity;GO:0003674//molecular_function	-
Bra000794	3.66667	25.3333	0.293333	1.99667	2.76698	2.78437e-06	8.37565e-05	yes	AT4G04460 (E=5e-247) | aspartyl protease family protein	-	GO:0016787//hydrolase activity;GO:0003674//molecular_function;GO:0003824//catalytic activity	GO:0043170//macromolecule metabolic process;GO:0019538//protein metabolic process;GO:0044238//primary metabolic process;GO:0008150//biological_process;GO:0071704//organic substance metabolic process;GO:0008152//metabolic process;GO:0006629//lipid metabolic process;GO:0044699//single-organism process;GO:0044710//single-organism metabolic process
Bra000842	11.6667	35.3333	0.793333	2.31	1.54189	0.00165096	0.0209959	yes	AT4G03190 (E=1e-291) GRH1, ATGRH1, AFB1 | GRH1 (GRR1-LIKE PROTEIN 1); auxin binding / protein binding / ubiquitin-protein ligase	-	GO:0005488//binding;GO:0003674//molecular_function;GO:0005515//protein binding	-
Bra000854	337	135.667	32.1933	12.95	-1.31381	9.17094e-06	0.000247445	yes	-	-	-	-
Bra000875	42.6667	106.667	7.79	18	1.2083	0.00417995	0.0448357	yes	AT2G02930 (E=6e-103) ATGSTF3, GST16 | ATGSTF3 (GLUTATHIONE S-TRANSFERASE F3); glutathione transferase	-	GO:0005488//binding;GO:0005515//protein binding;GO:0003674//molecular_function	-
Bra000883	123.333	47.6667	7.49333	2.82	-1.40991	0.00024875	0.00432455	yes	AT4G02390 (E=5e-298) APP, PARP1, ATPARP1 | APP (ARABIDOPSIS POLY(ADP-RIBOSE) POLYMERASE); NAD+ ADP-ribosyltransferase/ nucleic acid binding	-	GO:0016740//transferase activity;GO:0003676//nucleic acid binding;GO:0003674//molecular_function;GO:0003824//catalytic activity;GO:0097159//organic cyclic compound binding;GO:0005488//binding;GO:1901363//heterocyclic compound binding	GO:0019538//protein metabolic process;GO:0009058//biosynthetic process;GO:0071704//organic substance metabolic process;GO:0036211//protein modification process;GO:0044238//primary metabolic process;GO:0044260//cellular macromolecule metabolic process;GO:0044267//cellular protein metabolic process;GO:0006464//cellular protein modification process;GO:0005975//carbohydrate metabolic process;GO:00434…
Bra000909	29.6667	8	10.2767	2.83667	-1.8571	0.00289988	0.0334078	yes	AT4G01897 (E=1e-048) | unknown protein	GO:0005622//intracellular;GO:0005623//cell;GO:0044464//cell part;GO:0005575//cellular_component;GO:0005737//cytoplasm;GO:0044444//cytoplasmic part;GO:0005829//cytosol;GO:0044424//intracellular part	-	-
Bra000935	0	9.66667	0.001	0.716667	9.48516	0.000356697	0.00586466	yes	-	-	-	-
Bra000942	0.666667	7	0.0766667	0.893333	3.54253	0.00357634	0.0395465	yes	AT4G01070 (E=2e-151) GT72B1, UGT72B1 | GT72B1; UDP-glucosyltransferase/ UDP-glycosyltransferase/ transferase, transferring glycosyl groups	-	GO:0003824//catalytic activity;GO:0016740//transferase activity;GO:0003674//molecular_function	GO:0008152//metabolic process;GO:0008150//biological_process
Bra000990	32	97	1.49	4.31667	1.53461	4.16557e-05	0.000935817	yes	AT3G01750 (E=2e-305) | ankyrin repeat family protein	-	GO:0005515//protein binding;GO:0003674//molecular_function;GO:0005488//binding	-
Bra001009	1.66667	15.3333	0.233333	2.03	3.12102	1.10188e-05	0.000292608	yes	AT3G01290 (E=2e-140) | band 7 family protein	GO:0005575//cellular_component;GO:0016020//membrane	-	-
Bra001044	180	48.6667	14.2833	3.77	-1.9217	2.58164e-08	1.19874e-06	yes	AT3G02400 (E=9e-044) | forkhead-associated domain-containing protein / FHA domain-containing protein / AT hook motif-containing protein	-	GO:0003674//molecular_function;GO:0005515//protein binding;GO:0005488//binding	-
Bra001048	0.666667	14	0.0966667	1.87333	4.27645	1.25003e-05	0.00032813	yes	-	-	-	-
Bra001078	180.333	390	14.1033	28.5767	1.0188	0.00034022	0.00565194	yes	AT3G03470 (E=6e-248) CYP89A9 | CYP89A9; electron carrier/ heme binding / iron ion binding / monooxygenase/ oxygen binding	-	GO:0003824//catalytic activity;GO:0005488//binding;GO:0003674//molecular_function	GO:0008150//biological_process;GO:0008152//metabolic process
Bra001100	0.333333	10.6667	0.0366667	1.06333	4.85798	2.54472e-05	0.00061169	yes	AT3G04290 (E=8e-206) ATLTL1, LTL1 | LTL1 (LI-TOLERANT LIPASE 1); carboxylesterase/ hydrolase, acting on ester bonds	-	GO:0003824//catalytic activity;GO:0016787//hydrolase activity;GO:0003674//molecular_function	GO:0044699//single-organism process;GO:0008152//metabolic process;GO:0044710//single-organism metabolic process;GO:0044238//primary metabolic process;GO:0006629//lipid metabolic process;GO:0008150//biological_process;GO:0071704//organic substance metabolic process
Bra001140	150.333	74.3333	11.3067	5.25667	-1.10495	0.00094916	0.013399	yes	AT3G05220 (E=5e-026) | heavy-metal-associated domain-containing protein	-	GO:0005488//binding;GO:0003674//molecular_function	GO:0008150//biological_process;GO:0051234//establishment of localization;GO:0006810//transport;GO:0051179//localization
Bra001144	0	36.6667	0.001	4.84	12.2408	8.92923e-07	3.03784e-05	yes	AT3G05290 (E=3e-138) PNC1 | PNC1 (PEROXISOMAL ADENINE NUCLEOTIDE CARRIER 1); ADP transmembrane transporter/ ATP transmembrane transporter/ binding	GO:0042579//microbody;GO:0044464//cell part;GO:0005575//cellular_component;GO:0016020//membrane;GO:0005623//cell;GO:0043227//membrane-bounded organelle;GO:0043229//intracellular organelle;GO:0043231//intracellular membrane-bounded organelle;GO:0005777//peroxisome;GO:0044424//intracellular part;GO:0043226//organelle;GO:0005737//cytoplasm;GO:0005622//intracellular;GO:0044444//cytoplasmic part	GO:0003674//molecular_function;GO:0005215//transporter activity	GO:0019748//secondary metabolic process;GO:0071704//organic substance metabolic process;GO:0009056//catabolic process;GO:0044707//single-multicellular organism process;GO:0007275//multicellular organism development;GO:0050896//response to stimulus;GO:0006629//lipid metabolic process;GO:0044238//primary metabolic process;GO:0008150//biological_process;GO:0044767//single-organism developmental proc…
Bra001209	816	437.333	178.16	88.2567	-1.0134	0.00032448	0.00541863	yes	AT3G66656 (E=2e-058) AGL91 | AGL91; transcription factor	GO:0043227//membrane-bounded organelle;GO:0005623//cell;GO:0043226//organelle;GO:0044424//intracellular part;GO:0005622//intracellular;GO:0043231//intracellular membrane-bounded organelle;GO:0044464//cell part;GO:0005634//nucleus;GO:0043229//intracellular organelle;GO:0005575//cellular_component	GO:0005488//binding;GO:0003700//transcription factor activity, sequence-specific DNA binding;GO:0001071//nucleic acid binding transcription factor activity;GO:0003674//molecular_function;GO:0097159//organic cyclic compound binding;GO:0003676//nucleic acid binding;GO:0003677//DNA binding;GO:1901363//heterocyclic compound binding;GO:0005515//protein binding	GO:0006807//nitrogen compound metabolic process;GO:0009058//biosynthetic process;GO:0046483//heterocycle metabolic process;GO:0006725//cellular aromatic compound metabolic process;GO:0044238//primary metabolic process;GO:0008152//metabolic process;GO:0034641//cellular nitrogen compound metabolic process;GO:0006139//nucleobase-containing compound metabolic process;GO:1901360//organic cyclic compou…
Bra001223	6.66667	0.333333	0.2	0.01	-4.32193	0.00440527	0.0466273	yes	AT3G06880 (E=2e-283) | nucleotide binding	-	GO:0005488//binding;GO:0005515//protein binding;GO:0003674//molecular_function	GO:0050896//response to stimulus;GO:0050794//regulation of cellular process;GO:0051716//cellular response to stimulus;GO:0065007//biological regulation;GO:0044700//single organism signaling;GO:0008150//biological_process;GO:0007165//signal transduction;GO:0007154//cell communication;GO:0044699//single-organism process;GO:0023052//signaling;GO:0050789//regulation of biological process;GO:0009987//…
Bra001249	76.3333	34	11.5833	4.91333	-1.23728	0.00188786	0.0234668	yes	-	-	-	-
Bra001283	79.6667	280.33	5.95	20.1033	1.75647	1.17956e-08	5.82413e-07	yes	AT3G08040 (E=3e-196) FRD3, MAN1 | FRD3 (FERRIC REDUCTASE DEFECTIVE 3); antiporter/ transporter	GO:0016020//membrane;GO:0005575//cellular_component	GO:0003674//molecular_function;GO:0005215//transporter activity	GO:0008150//biological_process;GO:0051234//establishment of localization;GO:0006810//transport;GO:0051179//localization;GO:0009987//cellular process
Bra001324	2626.67	1316.33	318.797	151.357	-1.07468	4.36923e-06	0.000125408	yes	AT3G09200 (E=7e-147) | 60S acidic ribosomal protein P0 (RPP0B)	GO:0005575//cellular_component;GO:0005840//ribosome;GO:0044444//cytoplasmic part;GO:0043232//intracellular non-membrane-bounded organelle;GO:0044424//intracellular part;GO:0005737//cytoplasm;GO:0043226//organelle;GO:0005622//intracellular;GO:0043228//non-membrane-bounded organelle;GO:0032991//macromolecular complex;GO:0030529//intracellular ribonucleoprotein complex;GO:0043229//intracellular orga…	GO:0005198//structural molecule activity;GO:0003674//molecular_function	GO:0006412//translation;GO:0009059//macromolecule biosynthetic process;GO:1901576//organic substance biosynthetic process;GO:0019538//protein metabolic process;GO:1901566//organonitrogen compound biosynthetic process;GO:0006807//nitrogen compound metabolic process;GO:0043170//macromolecule metabolic process;GO:0044267//cellular protein metabolic process;GO:0010467//gene expression;GO:0044260//cel…
Bra001325	74.3333	25.3333	8.95333	3.10333	-1.52861	0.000103053	0.00205374	yes	AT3G09150 (E=1e-157) HY2, GUN3 | HY2 (ELONGATED HYPOCOTYL 2); phytochromobilin:ferredoxin oxidoreductase	-	GO:0003824//catalytic activity;GO:0003674//molecular_function;GO:0005488//binding	GO:0008152//metabolic process;GO:0008150//biological_process;GO:0009987//cellular process;GO:0009058//biosynthetic process
Bra001332	71.3333	25.6667	8.10333	2.98	-1.4432	0.00143026	0.0187199	yes	AT3G09190 (E=3e-110) | sugar binding	-	GO:0003674//molecular_function;GO:0005488//binding;GO:0030246//carbohydrate binding	-
Bra001333	34	6.33333	3.37667	0.613333	-2.46086	5.18715e-07	1.83509e-05	yes	AT3G09010 (E=2e-162) | protein kinase family protein	-	GO:0005488//binding;GO:0036094//small molecule binding;GO:0016301//kinase activity;GO:0003674//molecular_function;GO:1901265//nucleoside phosphate binding;GO:1901363//heterocyclic compound binding;GO:0097159//organic cyclic compound binding;GO:0003824//catalytic activity;GO:0016772//transferase activity, transferring phosphorus-containing groups;GO:0016740//transferase activity;GO:0000166//nucleo…	GO:0044260//cellular macromolecule metabolic process;GO:0036211//protein modification process;GO:0019538//protein metabolic process;GO:0006464//cellular protein modification process;GO:0008152//metabolic process;GO:0071704//organic substance metabolic process;GO:0044267//cellular protein metabolic process;GO:0043170//macromolecule metabolic process;GO:0008150//biological_process;GO:0043412//macro…
Bra001335	58	27	7.18	3.16	-1.18406	0.00207453	0.0253337	yes	AT3G08950 (E=3e-148) | electron transport SCO1/SenC family protein	GO:0043229//intracellular organelle;GO:0016020//membrane;GO:0005737//cytoplasm;GO:0043226//organelle;GO:0044444//cytoplasmic part;GO:0005623//cell;GO:0005575//cellular_component;GO:0043231//intracellular membrane-bounded organelle;GO:0005622//intracellular;GO:0044424//intracellular part;GO:0043227//membrane-bounded organelle;GO:0005739//mitochondrion;GO:0044464//cell part	GO:0003674//molecular_function;GO:0005488//binding	GO:0044763//single-organism cellular process;GO:0006810//transport;GO:0065008//regulation of biological quality;GO:0019725//cellular homeostasis;GO:0042592//homeostatic process;GO:0071840//cellular component organization or biogenesis;GO:0065007//biological regulation;GO:0009987//cellular process;GO:0044699//single-organism process;GO:0016043//cellular component organization;GO:0051179//localizat…
Bra001341	30.3333	595.333	2.59333	48.4567	4.22382	4.18009e-33	1.88081e-30	yes	AT3G08860 (E=2e-115) | alanine--glyoxylate aminotransferase, putative / beta-alanine-pyruvate aminotransferase, putative / AGT, putative	-	GO:0016740//transferase activity;GO:0003824//catalytic activity;GO:0003674//molecular_function;GO:0005488//binding	GO:0016043//cellular component organization;GO:0008150//biological_process;GO:0044707//single-multicellular organism process;GO:0009838//abscission;GO:0032502//developmental process;GO:0071840//cellular component organization or biogenesis;GO:0008152//metabolic process;GO:0007275//multicellular organism development;GO:0044767//single-organism developmental process;GO:0044699//single-organism proc…
Bra001349	3	20.6667	0.206667	1.38667	2.74624	0.000298892	0.00505742	yes	AT3G08660 (E=3e-231) | phototropic-responsive protein, putative	-	GO:0005515//protein binding;GO:0005488//binding;GO:0003674//molecular_function	-
Bra001354	116	44	14.4967	5.44667	-1.41228	2.30907e-05	0.000559679	yes	AT3G10330 (E=1e-169) | transcription initiation factor IIB-2 / general transcription factor TFIIB-2 (TFIIB2)	GO:0043226//organelle;GO:0043227//membrane-bounded organelle;GO:0044424//intracellular part;GO:0043229//intracellular organelle;GO:0043231//intracellular membrane-bounded organelle;GO:0005622//intracellular;GO:0005737//cytoplasm;GO:0044464//cell part;GO:0005575//cellular_component;GO:0005623//cell;GO:0005634//nucleus	GO:0005488//binding;GO:0003674//molecular_function;GO:0005515//protein binding	GO:0044238//primary metabolic process;GO:0006725//cellular aromatic compound metabolic process;GO:0006807//nitrogen compound metabolic process;GO:0008152//metabolic process;GO:0008150//biological_process;GO:0071704//organic substance metabolic process;GO:0046483//heterocycle metabolic process;GO:0009987//cellular process;GO:0009058//biosynthetic process;GO:0034641//cellular nitrogen compound meta…
Bra001392	312.15	135.667	28.0567	11.5433	-1.28128	0.000116767	0.0022801	yes	AT3G11170 (E=2e-220) FAD7, FADD | FAD7 (FATTY ACID DESATURASE 7); omega-3 fatty acid desaturase	-	GO:0003674//molecular_function;GO:0003824//catalytic activity	GO:0008150//biological_process;GO:0044238//primary metabolic process;GO:0044699//single-organism process;GO:0044710//single-organism metabolic process;GO:0008152//metabolic process;GO:0071704//organic substance metabolic process;GO:0006629//lipid metabolic process
Bra001404	3.66667	0	0.223333	0.001	-7.80305	0.00284651	0.0329353	yes	AT3G11450 (E=5e-075) | DNAJ heat shock N-terminal domain-containing protein / cell division protein-related	-	GO:0003677//DNA binding;GO:0003682//chromatin binding;GO:0005488//binding;GO:0003674//molecular_function;GO:0003676//nucleic acid binding;GO:1901363//heterocyclic compound binding;GO:0044877//macromolecular complex binding;GO:0097159//organic cyclic compound binding	-
Bra001405	105	1595.67	10.63	166.567	3.96989	4.74362e-24	1.17473e-21	yes	AT3G11480 (E=8e-185) BSMT1, ATBSMT1 | BSMT1; S-adenosylmethionine-dependent methyltransferase	-	GO:0016740//transferase activity;GO:0003824//catalytic activity;GO:0003674//molecular_function	GO:0008152//metabolic process;GO:0008150//biological_process
Bra001434	6.33333	0	0.863333	0.001	-9.75377	0.000259354	0.00447371	yes	AT4G13090 (E=1e-123) | xyloglucan:xyloglucosyl transferase, putative / xyloglucan endotransglycosylase, putative / endo-xyloglucan transferase, putative	GO:0005575//cellular_component;GO:0030312//external encapsulating structure;GO:0005623//cell;GO:0005618//cell wall;GO:0071944//cell periphery;GO:0005576//extracellular region;GO:0044464//cell part	GO:0016787//hydrolase activity;GO:0003674//molecular_function;GO:0016740//transferase activity;GO:0003824//catalytic activity	GO:0008152//metabolic process;GO:0071704//organic substance metabolic process;GO:0044238//primary metabolic process;GO:0016043//cellular component organization;GO:0005975//carbohydrate metabolic process;GO:0071840//cellular component organization or biogenesis;GO:0008150//biological_process;GO:0009987//cellular process
Bra001438	6.66667	44	0.713333	4.46	2.6444	3.40495e-07	1.25028e-05	yes	-	-	-	-
Bra001449	22.6667	4.66667	3.33333	0.696667	-2.25843	0.00030304	0.00511946	yes	-	-	-	-
Bra001457	2953.33	1025.67	196.483	61.8667	-1.66717	2.0436e-07	7.82817e-06	yes	AT3G12580 (E=2e-260) HSP70 | HSP70 (heat shock protein 70); ATP binding	-	GO:0036094//small molecule binding;GO:0003674//molecular_function;GO:0000166//nucleotide binding;GO:1901265//nucleoside phosphate binding;GO:1901363//heterocyclic compound binding;GO:0097159//organic cyclic compound binding;GO:0005488//binding	-
Bra001488	3	15.6667	0.0766667	0.416667	2.44222	0.00273606	0.0318716	yes	AT3G13080 (E=0.0) ATMRP3, MRP3 | ATMRP3; ATPase, coupled to transmembrane movement of substances / chlorophyll catabolite transporter/ glutathione S-conjugate-exporting ATPase	GO:0005575//cellular_component;GO:0016020//membrane	GO:0003674//molecular_function;GO:0003824//catalytic activity;GO:0005488//binding;GO:1901363//heterocyclic compound binding;GO:0005215//transporter activity;GO:0016787//hydrolase activity;GO:0097159//organic cyclic compound binding;GO:0036094//small molecule binding;GO:0000166//nucleotide binding;GO:1901265//nucleoside phosphate binding	GO:0008150//biological_process;GO:0006810//transport;GO:0051234//establishment of localization;GO:0009987//cellular process;GO:0051179//localization
Bra001526	83.0667	41	22.0167	10.4367	-1.07694	0.00153158	0.019729	yes	AT3G13882 (E=7e-067) | structural constituent of ribosome	GO:0043232//intracellular non-membrane-bounded organelle;GO:0005575//cellular_component;GO:0043228//non-membrane-bounded organelle;GO:0030529//intracellular ribonucleoprotein complex;GO:0005840//ribosome;GO:0043229//intracellular organelle;GO:0043226//organelle;GO:0044424//intracellular part;GO:1990904//ribonucleoprotein complex;GO:0044464//cell part;GO:0005623//cell;GO:0005622//intracellular;GO:…	GO:0005198//structural molecule activity;GO:0003674//molecular_function	GO:0044271//cellular nitrogen compound biosynthetic process;GO:0043043//peptide biosynthetic process;GO:1901576//organic substance biosynthetic process;GO:0044260//cellular macromolecule metabolic process;GO:0006412//translation;GO:0043604//amide biosynthetic process;GO:0044238//primary metabolic process;GO:1901564//organonitrogen compound metabolic process;GO:0034641//cellular nitrogen compound …
Bra001530	417	1002.33	39.16	90.5767	1.20976	2.03726e-08	9.61335e-07	yes	AT3G13920 (E=2e-232) EIF4A1, RH4, TIF4A1 | EIF4A1 (EUKARYOTIC TRANSLATION INITIATION FACTOR 4A1); ATP-dependent helicase/ translation initiation factor	-	GO:0036094//small molecule binding;GO:0097159//organic cyclic compound binding;GO:0003824//catalytic activity;GO:0005488//binding;GO:1901363//heterocyclic compound binding;GO:0003676//nucleic acid binding;GO:1901265//nucleoside phosphate binding;GO:0000166//nucleotide binding;GO:0016787//hydrolase activity;GO:0003674//molecular_function	-
Bra001537	332.667	153.333	11.1967	5.08667	-1.13828	7.41141e-06	0.000204814	yes	-	-	-	-
Bra001539	331.333	165	54.9533	26.48	-1.0533	0.000113769	0.00222837	yes	-	-	-	-
Bra001551	19	57	2.05333	5.96333	1.53815	0.000141572	0.00269688	yes	AT3G14420 (E=1e-138) | (S)-2-hydroxy-acid oxidase, peroxisomal, putative / glycolate oxidase, putative / short chain alpha-hydroxy acid oxidase, putative	GO:0043229//intracellular organelle;GO:0009536//plastid;GO:0005777//peroxisome;GO:0032991//macromolecular complex;GO:0030529//intracellular ribonucleoprotein complex;GO:0044444//cytoplasmic part;GO:0005829//cytosol;GO:0005623//cell;GO:0044424//intracellular part;GO:0016020//membrane;GO:0043231//intracellular membrane-bounded organelle;GO:0042579//microbody;GO:0005737//cytoplasm;GO:0043232//intrac…	GO:0003824//catalytic activity;GO:0000166//nucleotide binding;GO:1901363//heterocyclic compound binding;GO:0005488//binding;GO:1901265//nucleoside phosphate binding;GO:0097159//organic cyclic compound binding;GO:0036094//small molecule binding;GO:0003674//molecular_function	GO:0008150//biological_process;GO:0009719//response to endogenous stimulus;GO:0009607//response to biotic stimulus;GO:0009987//cellular process;GO:0008152//metabolic process;GO:0050896//response to stimulus;GO:0006950//response to stress;GO:0009605//response to external stimulus;GO:0009058//biosynthetic process
Bra001567	183	90	6.96333	3.23333	-1.10676	0.00193375	0.0239163	yes	AT3G14840 (E=0.0) | leucine-rich repeat family protein / protein kinase family protein	-	GO:0097159//organic cyclic compound binding;GO:0016772//transferase activity, transferring phosphorus-containing groups;GO:0000166//nucleotide binding;GO:0003824//catalytic activity;GO:1901363//heterocyclic compound binding;GO:0016740//transferase activity;GO:0036094//small molecule binding;GO:0003674//molecular_function;GO:1901265//nucleoside phosphate binding;GO:0016301//kinase activity;GO:0005…	GO:0044237//cellular metabolic process;GO:0006464//cellular protein modification process;GO:0008152//metabolic process;GO:0044267//cellular protein metabolic process;GO:0008150//biological_process;GO:0044238//primary metabolic process;GO:0071704//organic substance metabolic process;GO:0044260//cellular macromolecule metabolic process;GO:0043170//macromolecule metabolic process;GO:0036211//protein…
Bra001576	26	79	2.96667	8.71	1.55383	1.84696e-05	0.000458098	yes	AT3G14960 (E=3e-176) | galactosyltransferase family protein	GO:0012505//endomembrane system;GO:0005623//cell;GO:0005794//Golgi apparatus;GO:0005737//cytoplasm;GO:0043229//intracellular organelle;GO:0043226//organelle;GO:0044464//cell part;GO:0044424//intracellular part;GO:0043227//membrane-bounded organelle;GO:0044444//cytoplasmic part;GO:0005575//cellular_component;GO:0005622//intracellular;GO:0043231//intracellular membrane-bounded organelle;GO:0016020/…	GO:0016740//transferase activity;GO:0003824//catalytic activity;GO:0003674//molecular_function	GO:0044237//cellular metabolic process;GO:0044267//cellular protein metabolic process;GO:0044260//cellular macromolecule metabolic process;GO:0008152//metabolic process;GO:0044238//primary metabolic process;GO:0036211//protein modification process;GO:0043170//macromolecule metabolic process;GO:0005975//carbohydrate metabolic process;GO:0008150//biological_process;GO:0009058//biosynthetic process;…
Bra001577	81.6667	173	8.02333	16.98	1.08156	0.00139306	0.0183364	yes	-	-	-	-
Bra001578	133.667	342.333	14.1433	34.1367	1.2712	5.53007e-06	0.000157034	yes	-	-	-	-
Bra001579	8.66667	34.3333	0.833333	3.09	1.89064	0.000129282	0.00248499	yes	-	-	-	-
Bra001586	63.6667	167	8.09333	21.0567	1.37947	2.07284e-05	0.000508986	yes	AT3G15170 (E=6e-124) CUC1, anac054, ATNAC1 | CUC1 (CUP-SHAPED COTYLEDON1); transcription factor	GO:0043227//membrane-bounded organelle;GO:0043226//organelle;GO:0043229//intracellular organelle;GO:0043231//intracellular membrane-bounded organelle;GO:0005623//cell;GO:0044424//intracellular part;GO:0005622//intracellular;GO:0044464//cell part;GO:0005575//cellular_component;GO:0005634//nucleus	GO:0003676//nucleic acid binding;GO:1901363//heterocyclic compound binding;GO:0005488//binding;GO:0003677//DNA binding;GO:0097159//organic cyclic compound binding;GO:0003674//molecular_function	GO:0034641//cellular nitrogen compound metabolic process;GO:0006807//nitrogen compound metabolic process;GO:0044237//cellular metabolic process;GO:0008152//metabolic process;GO:0006139//nucleobase-containing compound metabolic process;GO:0008150//biological_process;GO:1901360//organic cyclic compound metabolic process;GO:0071704//organic substance metabolic process;GO:0006725//cellular aromatic c…
Bra001590	21.3333	3	1.37667	0.2	-2.78311	0.000891965	0.0127322	yes	AT3G15340 (E=1e-174) PPI2 | PPI2 (proton pump interactor 2); protein binding	GO:0043231//intracellular membrane-bounded organelle;GO:0043226//organelle;GO:0043229//intracellular organelle;GO:0012505//endomembrane system;GO:0071944//cell periphery;GO:0043227//membrane-bounded organelle;GO:0005886//plasma membrane;GO:0044464//cell part;GO:0005737//cytoplasm;GO:0044424//intracellular part;GO:0005622//intracellular;GO:0016020//membrane;GO:0005575//cellular_component;GO:004444…	-	GO:0008150//biological_process;GO:0051179//localization;GO:0006810//transport;GO:0051234//establishment of localization
Bra001591	16	58.6667	1.17667	4.09333	1.79857	7.53719e-05	0.00156353	yes	AT3G15355 (E=4e-137) UBC25, PFU1 | UBC25 (UBIQUITIN-CONJUGATING ENZYME 25); small conjugating protein ligase	-	GO:0003824//catalytic activity;GO:0003674//molecular_function	-
Bra001592	15.6667	80	3.82	18.5933	2.28314	8.00524e-08	3.37574e-06	yes	AT3G15360 (E=9e-057) ATHM4, TRX-M4, ATM4 | TRX-M4 (ARABIDOPSIS THIOREDOXIN M-TYPE 4); enzyme activator	-	GO:0003824//catalytic activity;GO:0003674//molecular_function	GO:0044699//single-organism process;GO:0044763//single-organism cellular process;GO:0019725//cellular homeostasis;GO:0008152//metabolic process;GO:0042592//homeostatic process;GO:0065008//regulation of biological quality;GO:0009987//cellular process;GO:0065007//biological regulation;GO:0008150//biological_process
Bra001596	9.66667	125.667	1.29	15.9	3.62358	8.62828e-19	1.35783e-16	yes	AT3G15500 (E=6e-100) ATNAC3, ANAC055 | ANAC055 (ARABIDOPSIS NAC DOMAIN CONTAINING PROTEIN 55); transcription factor	GO:0005622//intracellular;GO:0043226//organelle;GO:0043227//membrane-bounded organelle;GO:0043231//intracellular membrane-bounded organelle;GO:0005575//cellular_component;GO:0005623//cell;GO:0044464//cell part;GO:0044424//intracellular part;GO:0043229//intracellular organelle;GO:0005634//nucleus	GO:1901363//heterocyclic compound binding;GO:0003677//DNA binding;GO:0005488//binding;GO:0097159//organic cyclic compound binding;GO:0003674//molecular_function;GO:0003676//nucleic acid binding	GO:0009987//cellular process;GO:0044238//primary metabolic process;GO:0008150//biological_process;GO:0034641//cellular nitrogen compound metabolic process;GO:0006725//cellular aromatic compound metabolic process;GO:0046483//heterocycle metabolic process;GO:0009058//biosynthetic process;GO:0044237//cellular metabolic process;GO:0006139//nucleobase-containing compound metabolic process;GO:0006807//…
Bra001598	2	27	0.396667	5.54667	3.80562	8.28267e-08	3.4588e-06	yes	AT3G15540 (E=1e-102) IAA19, MSG2 | IAA19 (INDOLE-3-ACETIC ACID INDUCIBLE 19); transcription factor	GO:0005622//intracellular;GO:0005634//nucleus;GO:0005575//cellular_component;GO:0044464//cell part;GO:0043226//organelle;GO:0044424//intracellular part;GO:0043231//intracellular membrane-bounded organelle;GO:0043227//membrane-bounded organelle;GO:0005623//cell;GO:0043229//intracellular organelle	GO:0003674//molecular_function;GO:0005488//binding;GO:0005515//protein binding	GO:0044700//single organism signaling;GO:0008150//biological_process;GO:0009987//cellular process;GO:0044237//cellular metabolic process;GO:0009058//biosynthetic process;GO:0044238//primary metabolic process;GO:0065007//biological regulation;GO:0051716//cellular response to stimulus;GO:0050789//regulation of biological process;GO:0006725//cellular aromatic compound metabolic process;GO:0023052//s…
Bra001599	1.33333	24.6667	0.116667	2.13667	4.1949	1.21743e-09	7.00756e-08	yes	-	-	-	-
Bra001600	15	51.3333	5.22333	17.0067	1.70306	0.000105537	0.00209279	yes	AT3G15630 (E=6e-029) | unknown protein	-	-	GO:0008150//biological_process
Bra001606	9.66667	47.6667	1.75667	8.34667	2.24836	2.45572e-06	7.54332e-05	yes	-	-	-	-
Bra001615	1	13.6667	0.206667	2.67	3.69146	8.88828e-06	0.000240835	yes	AT4G14540 (E=2e-062) NF-YB3 | NF-YB3 (NUCLEAR FACTOR Y, SUBUNIT B3); transcription factor	GO:0044424//intracellular part;GO:0005575//cellular_component;GO:0044464//cell part;GO:0043231//intracellular membrane-bounded organelle;GO:0043229//intracellular organelle;GO:0043226//organelle;GO:0005622//intracellular;GO:0005623//cell;GO:0043227//membrane-bounded organelle;GO:0005634//nucleus	GO:0005515//protein binding;GO:0003677//DNA binding;GO:1901363//heterocyclic compound binding;GO:0097159//organic cyclic compound binding;GO:0003676//nucleic acid binding;GO:0005488//binding;GO:0003674//molecular_function	GO:0044237//cellular metabolic process;GO:0006139//nucleobase-containing compound metabolic process;GO:1901360//organic cyclic compound metabolic process;GO:0009987//cellular process;GO:0009058//biosynthetic process;GO:0006725//cellular aromatic compound metabolic process;GO:0006807//nitrogen compound metabolic process;GO:0046483//heterocycle metabolic process;GO:0008150//biological_process;GO:00…
Bra001617	21.98	91.8567	1.32333	5.51333	2.05875	6.76869e-06	0.000189014	yes	AT3G15990 (E=0.0) SULTR3;4 | SULTR3;4 (SULFATE TRANSPORTER 3;4); sulfate transmembrane transporter	GO:0005575//cellular_component;GO:0016020//membrane	GO:0005215//transporter activity;GO:0003674//molecular_function	GO:0009987//cellular process;GO:0051234//establishment of localization;GO:0008150//biological_process;GO:0051179//localization;GO:0006810//transport
Bra001624	0	45	0.001	5.99333	12.5491	1.06851e-16	1.36538e-14	yes	AT1G52300 (E=6e-049) | 60S ribosomal protein L37 (RPL37B)	GO:0030529//intracellular ribonucleoprotein complex;GO:0043226//organelle;GO:0005622//intracellular;GO:0044424//intracellular part;GO:0005737//cytoplasm;GO:0044444//cytoplasmic part;GO:0005575//cellular_component;GO:0005623//cell;GO:0043228//non-membrane-bounded organelle;GO:0032991//macromolecular complex;GO:0044464//cell part;GO:0043229//intracellular organelle;GO:1990904//ribonucleoprotein com…	GO:0005198//structural molecule activity;GO:0003674//molecular_function	GO:1901566//organonitrogen compound biosynthetic process;GO:0071704//organic substance metabolic process;GO:0008150//biological_process;GO:1901576//organic substance biosynthetic process;GO:1901564//organonitrogen compound metabolic process;GO:0006807//nitrogen compound metabolic process;GO:0006518//peptide metabolic process;GO:0009059//macromolecule biosynthetic process;GO:0019538//protein metab…
Bra001642	40.6667	14.6667	3.55	1.19333	-1.57282	0.000449245	0.00715076	yes	AT3G16850 (E=2e-226) | glycoside hydrolase family 28 protein / polygalacturonase (pectinase) family protein	GO:0005576//extracellular region;GO:0005575//cellular_component	GO:0016787//hydrolase activity;GO:0003674//molecular_function;GO:0003824//catalytic activity	GO:0005975//carbohydrate metabolic process;GO:0008152//metabolic process;GO:0044238//primary metabolic process;GO:0071840//cellular component organization or biogenesis;GO:0071704//organic substance metabolic process;GO:0009987//cellular process;GO:0016043//cellular component organization;GO:0008150//biological_process
Bra001663	54	114	7.74	16.3433	1.0783	0.00131762	0.0175095	yes	AT3G17440 (E=4e-144) NPSN13, ATNPSN13 | NPSN13 (NOVEL PLANT SNARE 13)	-	GO:0003674//molecular_function;GO:0005488//binding;GO:0005515//protein binding	-
Bra001670	60	19.6667	15.6233	5.15667	-1.59919	0.000545702	0.00841361	yes	AT3G17600 (E=2e-053) IAA31 | IAA31 (INDOLE-3-ACETIC ACID INDUCIBLE 31); transcription factor	GO:0005634//nucleus;GO:0005575//cellular_component;GO:0043226//organelle;GO:0005623//cell;GO:0005622//intracellular;GO:0044424//intracellular part;GO:0043227//membrane-bounded organelle;GO:0043231//intracellular membrane-bounded organelle;GO:0043229//intracellular organelle;GO:0044464//cell part	GO:0003674//molecular_function;GO:0005488//binding;GO:0005515//protein binding	GO:0050896//response to stimulus;GO:0034641//cellular nitrogen compound metabolic process;GO:0044700//single organism signaling;GO:0009058//biosynthetic process;GO:0006807//nitrogen compound metabolic process;GO:0044763//single-organism cellular process;GO:0044238//primary metabolic process;GO:0065007//biological regulation;GO:0046483//heterocycle metabolic process;GO:0009987//cellular process;GO…
Bra001671	4.66667	0	1.20667	0.001	-10.2368	0.000618587	0.00938783	yes	AT3G17609 (E=1e-058) HYH | HYH (HY5-HOMOLOG); DNA binding / transcription factor	-	GO:0003677//DNA binding;GO:0005488//binding;GO:0001071//nucleic acid binding transcription factor activity;GO:0003676//nucleic acid binding;GO:0003674//molecular_function;GO:1901363//heterocyclic compound binding;GO:0003700//transcription factor activity, sequence-specific DNA binding;GO:0097159//organic cyclic compound binding	GO:0006807//nitrogen compound metabolic process;GO:0044237//cellular metabolic process;GO:0006139//nucleobase-containing compound metabolic process;GO:0008150//biological_process;GO:0044238//primary metabolic process;GO:0046483//heterocycle metabolic process;GO:0071704//organic substance metabolic process;GO:0009058//biosynthetic process;GO:0009987//cellular process;GO:0008152//metabolic process;…
Bra001686	543	1498	59.4233	158.237	1.41298	1.29908e-08	6.35534e-07	yes	AT3G17820 (E=6e-169) ATGSKB6, GLN1.3, GLN1;3 | ATGSKB6; copper ion binding / glutamate-ammonia ligase	-	GO:0097159//organic cyclic compound binding;GO:1901363//heterocyclic compound binding;GO:0003674//molecular_function;GO:0005488//binding;GO:0036094//small molecule binding;GO:1901265//nucleoside phosphate binding;GO:0000166//nucleotide binding;GO:0003824//catalytic activity	GO:0008150//biological_process;GO:0009987//cellular process;GO:0008152//metabolic process;GO:0009058//biosynthetic process
Bra001703	56.6667	4	8.68667	0.6	-3.85577	7.00981e-14	7.01992e-12	yes	-	-	-	-
Bra001725	21.6667	63	1.59667	4.37333	1.45367	0.000270756	0.00464032	yes	AT3G18830 (E=4e-253) ATPLT5 | ATPLT5 (POLYOL TRANSPORTER 5); D-ribose transmembrane transporter/ D-xylose transmembrane transporter/ carbohydrate transmembrane transporter/ galactose transmembrane transporter/ glucose transmembrane transporter/ glycerol transmembrane transporter/ mann	GO:0016020//membrane;GO:0005623//cell;GO:0044464//cell part;GO:0005886//plasma membrane;GO:0071944//cell periphery;GO:0005575//cellular_component	GO:0003674//molecular_function;GO:0005215//transporter activity	GO:0007275//multicellular organism development;GO:0008150//biological_process;GO:0044699//single-organism process;GO:0044707//single-multicellular organism process;GO:0051234//establishment of localization;GO:0009791//post-embryonic development;GO:0032502//developmental process;GO:0044767//single-organism developmental process;GO:0009653//anatomical structure morphogenesis;GO:0051179//localizatio…
Bra001728	67.6667	29.3333	5.77	2.4	-1.26554	0.000558387	0.00859674	yes	AT3G18950 (E=5e-208) | transducin family protein / WD-40 repeat family protein	-	GO:0003674//molecular_function;GO:0005515//protein binding;GO:0005488//binding	-
Bra001734	28.3333	156.667	1.7	9.58	2.49449	1.62597e-08	7.79931e-07	yes	AT3G19100 (E=2e-289) | calcium-dependent protein kinase, putative / CDPK, putative	-	GO:0097159//organic cyclic compound binding;GO:1901265//nucleoside phosphate binding;GO:1901363//heterocyclic compound binding;GO:0036094//small molecule binding;GO:0003824//catalytic activity;GO:0003674//molecular_function;GO:0000166//nucleotide binding;GO:0016740//transferase activity;GO:0016301//kinase activity;GO:0005488//binding;GO:0016772//transferase activity, transferring phosphorus-conta…	GO:0044237//cellular metabolic process;GO:0009987//cellular process;GO:0043412//macromolecule modification;GO:0071704//organic substance metabolic process;GO:0008152//metabolic process;GO:0036211//protein modification process;GO:0044267//cellular protein metabolic process;GO:0044238//primary metabolic process;GO:0006464//cellular protein modification process;GO:0019538//protein metabolic process;…
Bra001744	63	8	19.3167	2.43667	-2.98687	7.95851e-09	4.04201e-07	yes	AT1G49760 (E=5e-018) PAB8, PABP8 | PAB8 (POLY(A) BINDING PROTEIN 8); RNA binding / translation initiation factor	-	GO:1901363//heterocyclic compound binding;GO:0003676//nucleic acid binding;GO:0003723//RNA binding;GO:0005488//binding;GO:0097159//organic cyclic compound binding;GO:0003674//molecular_function	-
Bra001752	20	165.333	2.94	23.2233	2.98169	2.577e-15	2.88859e-13	yes	AT3G19580 (E=7e-078) AZF2 | AZF2 (ARABIDOPSIS ZINC-FINGER PROTEIN 2); DNA binding / nucleic acid binding / transcription factor/ transcription repressor/ zinc ion binding	-	GO:0005488//binding;GO:0003674//molecular_function	-
Bra001781	14.3333	51.6667	0.673333	2.40333	1.83564	0.000197133	0.00355999	yes	AT3G20250 (E=2e-221) APUM5 | APUM5 (Arabidopsis Pumilio 5); RNA binding / binding	-	GO:0003723//RNA binding;GO:0003674//molecular_function;GO:0003676//nucleic acid binding;GO:0097159//organic cyclic compound binding;GO:1901363//heterocyclic compound binding;GO:0005488//binding	-
Bra001794	6.66667	0.666667	1.25	0.103333	-3.59655	0.00221922	0.0267328	yes	AT3G20570 (E=1e-076) | plastocyanin-like domain-containing protein	-	GO:0003674//molecular_function;GO:0005488//binding	-
Bra001811	3.66667	86.6667	0.34	8.16333	4.58555	2.12007e-18	3.1947e-16	yes	AT3G21110 (E=6e-216) PUR7, PURC, ATPURC | PUR7 (PURIN 7); phosphoribosylaminoimidazolesuccinocarboxamide synthase	-	GO:0003674//molecular_function;GO:0036094//small molecule binding;GO:0003824//catalytic activity;GO:0097159//organic cyclic compound binding;GO:0005488//binding;GO:0000166//nucleotide binding;GO:1901363//heterocyclic compound binding;GO:1901265//nucleoside phosphate binding	GO:0046483//heterocycle metabolic process;GO:0006807//nitrogen compound metabolic process;GO:0044238//primary metabolic process;GO:0009987//cellular process;GO:0044237//cellular metabolic process;GO:0034641//cellular nitrogen compound metabolic process;GO:0009058//biosynthetic process;GO:0006725//cellular aromatic compound metabolic process;GO:0006139//nucleobase-containing compound metabolic pro…
Bra001814	0	35.6667	0.001	3.6	11.8138	2.36675e-16	2.94196e-14	yes	AT3G21140 (E=2e-167) | FMN binding	-	GO:0000166//nucleotide binding;GO:0003824//catalytic activity;GO:0003674//molecular_function;GO:0097159//organic cyclic compound binding;GO:0005488//binding;GO:1901363//heterocyclic compound binding;GO:1901265//nucleoside phosphate binding;GO:0036094//small molecule binding	GO:0008152//metabolic process;GO:0008150//biological_process
Bra001817	47.6667	2.33333	4.88667	0.236667	-4.36792	1.60096e-14	1.67139e-12	yes	AT3G21220 (E=2e-135) ATMKK5, ATMAP2K_ALPHA, MAP2K_A, MKK5, ATMEK5, MEK5 | ATMKK5 (ARABIDOPSIS THALIANA MITOGEN-ACTIVATED PROTEIN KINASE KINASE 5); MAP kinase kinase/ kinase	GO:0043226//organelle;GO:0005737//cytoplasm;GO:0016020//membrane;GO:0044464//cell part;GO:0044424//intracellular part;GO:0043227//membrane-bounded organelle;GO:0005622//intracellular;GO:0043229//intracellular organelle;GO:0005739//mitochondrion;GO:0044444//cytoplasmic part;GO:0005575//cellular_component;GO:0043231//intracellular membrane-bounded organelle;GO:0005623//cell	GO:0016301//kinase activity;GO:0016740//transferase activity;GO:0000166//nucleotide binding;GO:0097159//organic cyclic compound binding;GO:0036094//small molecule binding;GO:0003674//molecular_function;GO:0016787//hydrolase activity;GO:0003824//catalytic activity;GO:1901363//heterocyclic compound binding;GO:0016772//transferase activity, transferring phosphorus-containing groups;GO:0005488//bindi…	GO:0008150//biological_process;GO:0043170//macromolecule metabolic process;GO:0036211//protein modification process;GO:0044260//cellular macromolecule metabolic process;GO:0044267//cellular protein metabolic process;GO:1901360//organic cyclic compound metabolic process;GO:0006810//transport;GO:0071704//organic substance metabolic process;GO:0051234//establishment of localization;GO:0006464//cellu…
Bra001819	141.333	330	9.51667	21.48	1.17447	1.37045e-05	0.000353923	yes	AT3G21230 (E=7e-258) 4CL5 | 4CL5 (4-coumarate:CoA ligase 5); 4-coumarate-CoA ligase	-	GO:0003674//molecular_function;GO:0003824//catalytic activity	GO:0006950//response to stress;GO:0009058//biosynthetic process;GO:0009987//cellular process;GO:0019748//secondary metabolic process;GO:0050896//response to stimulus;GO:0044710//single-organism metabolic process;GO:0008152//metabolic process;GO:0008150//biological_process;GO:0044699//single-organism process
Bra001822	119.667	57	22.5467	10.3567	-1.12235	0.000517444	0.00807931	yes	AT3G21270 (E=2e-067) ADOF2 | ADOF2; DNA binding / transcription factor	-	GO:0003674//molecular_function;GO:0005488//binding;GO:0003676//nucleic acid binding;GO:1901363//heterocyclic compound binding;GO:0003677//DNA binding;GO:0097159//organic cyclic compound binding	GO:0034641//cellular nitrogen compound metabolic process;GO:0006807//nitrogen compound metabolic process;GO:0006139//nucleobase-containing compound metabolic process;GO:0008152//metabolic process;GO:0046483//heterocycle metabolic process;GO:0009058//biosynthetic process;GO:0044237//cellular metabolic process;GO:0044238//primary metabolic process;GO:0009987//cellular process;GO:1901360//organic cy…
Bra001825	41	1.66667	2.95333	0.126667	-4.54324	4.71617e-07	1.69094e-05	yes	-	-	-	-
Bra001826	11.6667	0	1.39333	0.001	-10.4443	1.41885e-07	5.64465e-06	yes	AT3G21330 (E=1e-086) | basic helix-loop-helix (bHLH) family protein	-	GO:0005515//protein binding;GO:0003674//molecular_function;GO:0005488//binding	-
Bra001840	2	13.3333	0.173333	1.19	2.77934	0.00128601	0.0171537	yes	AT3G21690 (E=1e-210) | MATE efflux family protein	GO:0016020//membrane;GO:0005575//cellular_component	GO:0003674//molecular_function;GO:0005215//transporter activity	GO:0008150//biological_process;GO:0009987//cellular process;GO:0051234//establishment of localization;GO:0051179//localization;GO:0006810//transport
Bra001845	120.667	12	9.76	0.846667	-3.52702	1.7088e-10	1.12555e-08	yes	AT3G21760 (E=1e-224) | UDP-glucoronosyl/UDP-glucosyl transferase family protein	-	GO:0003674//molecular_function;GO:0003824//catalytic activity;GO:0016740//transferase activity	GO:0008150//biological_process;GO:0008152//metabolic process
Bra001852	194.667	39.3333	28.6	5.52667	-2.37153	2.95195e-08	1.35493e-06	yes	-	-	-	-
Bra001891	122	361.667	10.19	28.9433	1.50608	4.16981e-07	1.50518e-05	yes	AT3G22890 (E=3e-252) APS1 | APS1 (ATP SULFURYLASE 1); sulfate adenylyltransferase (ATP)	-	GO:0003674//molecular_function;GO:0003824//catalytic activity;GO:0016740//transferase activity	GO:0008150//biological_process;GO:0009987//cellular process;GO:0008152//metabolic process
Bra001899	7	0	1.53333	0.001	-10.5825	0.000286086	0.00487951	yes	AT3G23030 (E=1e-081) IAA2 | IAA2 (INDOLE-3-ACETIC ACID INDUCIBLE 2); transcription factor	GO:0043226//organelle;GO:0005575//cellular_component;GO:0005634//nucleus;GO:0043227//membrane-bounded organelle;GO:0005623//cell;GO:0044464//cell part;GO:0005622//intracellular;GO:0044424//intracellular part;GO:0043229//intracellular organelle;GO:0043231//intracellular membrane-bounded organelle	GO:0005515//protein binding;GO:0005488//binding;GO:0003674//molecular_function	GO:0009058//biosynthetic process;GO:0050896//response to stimulus;GO:0044763//single-organism cellular process;GO:0006807//nitrogen compound metabolic process;GO:0071704//organic substance metabolic process;GO:0065007//biological regulation;GO:0009987//cellular process;GO:0044238//primary metabolic process;GO:0046483//heterocycle metabolic process;GO:0008150//biological_process;GO:0006139//nucleo…
Bra001903	2	21	0.106667	1.13	3.40514	1.14737e-06	3.81412e-05	yes	AT3G16030 (E=1e-191) CES101 | CES101 (CALLUS EXPRESSION OF RBCS 101); ATP binding / carbohydrate binding / kinase/ protein kinase/ protein serine/threonine kinase/ protein tyrosine kinase/ sugar binding	-	GO:0003824//catalytic activity;GO:0097159//organic cyclic compound binding;GO:0005488//binding;GO:0016740//transferase activity;GO:0016772//transferase activity, transferring phosphorus-containing groups;GO:1901265//nucleoside phosphate binding;GO:0000166//nucleotide binding;GO:0036094//small molecule binding;GO:1901363//heterocyclic compound binding;GO:0003674//molecular_function;GO:0016301//kin…	GO:0019538//protein metabolic process;GO:0006464//cellular protein modification process;GO:0044260//cellular macromolecule metabolic process;GO:0036211//protein modification process;GO:0071704//organic substance metabolic process;GO:0009987//cellular process;GO:0008150//biological_process;GO:0043170//macromolecule metabolic process;GO:0008152//metabolic process;GO:0043412//macromolecule modificat…
Bra001905	25.3333	7	9.53	2.50333	-1.92863	0.000343434	0.00568463	yes	-	-	-	-
Bra001937	53.3333	441	3.7	29.4533	2.99283	3.4738e-27	1.08798e-24	yes	AT3G23920 (E=1e-263) BAM1, BMY7, TR-BAMY | BAM1 (BETA-AMYLASE 1); beta-amylase	-	GO:0003674//molecular_function;GO:0003824//catalytic activity;GO:0016787//hydrolase activity	GO:0008150//biological_process;GO:0009056//catabolic process;GO:0008152//metabolic process;GO:0044238//primary metabolic process;GO:0005975//carbohydrate metabolic process;GO:0071704//organic substance metabolic process
Bra001953	48	13	9.52	2.64667	-1.84679	0.000126978	0.00244954	yes	AT2G15970 (E=2e-070) COR413-PM1, WCOR413, WCOR413-LIKE, ATCOR413-PM1, FL3-5A3 | COR413-PM1	GO:0016020//membrane;GO:0005575//cellular_component	-	-
Bra001986	45.3333	286	5.66	33.64	2.5713	6.95814e-07	2.40828e-05	yes	AT5G42180 (E=1e-156) | peroxidase 64 (PER64) (P64) (PRXR4)	-	GO:0003674//molecular_function;GO:0005488//binding;GO:0003824//catalytic activity	GO:0050896//response to stimulus;GO:0008150//biological_process;GO:0006950//response to stress;GO:0008152//metabolic process
Bra002003	41.3333	12.6667	3.92667	1.21667	-1.69037	0.00280342	0.0325074	yes	AT2G16900 (E=1e-114) | FUNCTIONS IN: molecular_function unknown; INVOLVED IN: biological_process unknown; LOCATED IN: plasma membrane; EXPRESSED IN: 24 plant structures; EXPRESSED DURING: 13 growth stages; CONTAINS InterPro DOMAIN/s: Phospholipase-like, arabidopsis (InterPro:IPR007942); BEST Arabidopsis thaliana protein match is: unknown protein (TAIR:AT4G35110.4); Has 353 Blast hits to 254 prote…	-	GO:0003674//molecular_function;GO:0003682//chromatin binding;GO:0005488//binding;GO:0044877//macromolecular complex binding	GO:0071840//cellular component organization or biogenesis;GO:0016043//cellular component organization;GO:0044763//single-organism cellular process;GO:0009987//cellular process;GO:0008152//metabolic process;GO:0007049//cell cycle;GO:0044699//single-organism process;GO:0008150//biological_process
Bra002046	18	88.6667	1.77333	8.92667	2.33166	4.35495e-08	1.94306e-06	yes	AT3G11520 (E=5e-142) CYCB1;3, CYC2 | CYCB1;3 (CYCLIN B1;3); cyclin-dependent protein kinase regulator	GO:0043227//membrane-bounded organelle;GO:0005575//cellular_component;GO:0005623//cell;GO:0044464//cell part;GO:0005634//nucleus;GO:0044424//intracellular part;GO:0043226//organelle;GO:0005622//intracellular;GO:0043231//intracellular membrane-bounded organelle;GO:0043229//intracellular organelle	GO:0005488//binding;GO:0005515//protein binding;GO:0003674//molecular_function	GO:0048731//system development;GO:0044699//single-organism process;GO:0003006//developmental process involved in reproduction;GO:0044237//cellular metabolic process;GO:0071840//cellular component organization or biogenesis;GO:0043412//macromolecule modification;GO:0090304//nucleic acid metabolic process;GO:0006259//DNA metabolic process;GO:0043170//macromolecule metabolic process;GO:0032501//mult…
Bra002063	67.6667	24.3333	4.36	1.5	-1.53937	0.0018354	0.0229845	yes	AT2G17480 (E=9e-251) MLO8, ATMLO8 | MLO8 (MILDEW RESISTANCE LOCUS O 8); calmodulin binding	GO:0016020//membrane;GO:0005575//cellular_component	GO:0005515//protein binding;GO:0005488//binding;GO:0003674//molecular_function	GO:0009607//response to biotic stimulus;GO:0006950//response to stress;GO:0050896//response to stimulus;GO:0008150//biological_process
Bra002101	229.333	61.6667	28.0167	7.52667	-1.8962	3.75187e-10	2.35014e-08	yes	AT5G17710 (E=2e-105) EMB1241 | EMB1241 (embryo defective 1241); adenyl-nucleotide exchange factor/ chaperone binding / protein binding / protein homodimerization	GO:0005575//cellular_component;GO:0005623//cell;GO:0043226//organelle;GO:0044444//cytoplasmic part;GO:0005739//mitochondrion;GO:0043231//intracellular membrane-bounded organelle;GO:0005622//intracellular;GO:0044464//cell part;GO:0044424//intracellular part;GO:0043229//intracellular organelle;GO:0043227//membrane-bounded organelle;GO:0005737//cytoplasm	GO:0005515//protein binding;GO:0097159//organic cyclic compound binding;GO:0000166//nucleotide binding;GO:0030234//enzyme regulator activity;GO:0003674//molecular_function;GO:0036094//small molecule binding;GO:1901265//nucleoside phosphate binding;GO:1901363//heterocyclic compound binding;GO:0098772//molecular function regulator;GO:0005488//binding	GO:0009987//cellular process;GO:0008150//biological_process
Bra002132	99.3333	36	12.3333	4.57333	-1.43124	0.000427905	0.00687236	yes	AT5G18090 (E=2e-085) | transcriptional factor B3 family protein	GO:0005634//nucleus;GO:0005575//cellular_component;GO:0005622//intracellular;GO:0005623//cell;GO:0044424//intracellular part;GO:0043226//organelle;GO:0044464//cell part;GO:0043227//membrane-bounded organelle;GO:0043231//intracellular membrane-bounded organelle;GO:0043229//intracellular organelle	GO:0003674//molecular_function;GO:0003677//DNA binding;GO:0097159//organic cyclic compound binding;GO:1901363//heterocyclic compound binding;GO:0003676//nucleic acid binding;GO:0005488//binding	GO:0006725//cellular aromatic compound metabolic process;GO:0008152//metabolic process;GO:0009058//biosynthetic process;GO:0034641//cellular nitrogen compound metabolic process;GO:0071704//organic substance metabolic process;GO:0044237//cellular metabolic process;GO:0006139//nucleobase-containing compound metabolic process;GO:1901360//organic cyclic compound metabolic process;GO:0009987//cellular…
Bra002137	255.667	23.3333	29.0233	2.58333	-3.48991	3.71979e-25	1.02442e-22	yes	AT5G18140 (E=5e-112) | DNAJ heat shock N-terminal domain-containing protein	GO:0044444//cytoplasmic part;GO:0044424//intracellular part;GO:0043229//intracellular organelle;GO:0005622//intracellular;GO:0009536//plastid;GO:0043227//membrane-bounded organelle;GO:0005575//cellular_component;GO:0043231//intracellular membrane-bounded organelle;GO:0005623//cell;GO:0043226//organelle;GO:0005737//cytoplasm;GO:0044464//cell part	-	-
Bra002174	74.6667	7.33333	8.19	0.83	-3.30268	7.49336e-11	5.17025e-09	yes	AT5G18630 (E=2e-176) | lipase class 3 family protein	-	GO:0003824//catalytic activity;GO:0003674//molecular_function;GO:0016787//hydrolase activity	GO:0044238//primary metabolic process;GO:0008150//biological_process;GO:0008152//metabolic process;GO:0044699//single-organism process;GO:0071704//organic substance metabolic process;GO:0044710//single-organism metabolic process;GO:0006629//lipid metabolic process
Bra002235	56.6667	18.6667	1.98333	0.646667	-1.61683	0.000151284	0.00285803	yes	AT5G19420 (E=0.0) | Ran GTPase binding / chromatin binding / zinc ion binding	-	GO:0005488//binding;GO:0003674//molecular_function	-
Bra002238	40.3333	8.33333	3.81667	0.803333	-2.24824	7.67312e-06	0.000211133	yes	AT5G19460 (E=2e-134) atnudt20 | atnudt20 (Arabidopsis thaliana Nudix hydrolase homolog 20); hydrolase	-	GO:0003674//molecular_function;GO:0003824//catalytic activity;GO:0016787//hydrolase activity	-
Bra002239	112.667	37	20.7067	7.11333	-1.5415	0.00434738	0.0461577	yes	AT5G19480 (E=2e-054) | unknown protein	-	-	GO:0009058//biosynthetic process;GO:0005975//carbohydrate metabolic process;GO:0008150//biological_process;GO:0009987//cellular process;GO:0008152//metabolic process;GO:0044238//primary metabolic process;GO:0071704//organic substance metabolic process
Bra002245	619.667	3211.67	59.6567	294.503	2.30353	2.00894e-24	5.26045e-22	yes	AT5G19550 (E=7e-220) ASP2, AAT2 | ASP2 (ASPARTATE AMINOTRANSFERASE 2); L-aspartate:2-oxoglutarate aminotransferase	-	GO:0003674//molecular_function;GO:0003824//catalytic activity;GO:0005488//binding;GO:0016740//transferase activity	GO:0008150//biological_process;GO:0009987//cellular process;GO:0009058//biosynthetic process;GO:0008152//metabolic process
Bra002260	0.556667	763.937	0.0566667	69.05	10.2509	2.45072e-79	6.52422e-76	yes	AT5G19770 (E=3e-139) TUA3 | TUA3; structural constituent of cytoskeleton	GO:0043228//non-membrane-bounded organelle;GO:0043226//organelle;GO:0005575//cellular_component;GO:0044424//intracellular part;GO:0044464//cell part;GO:0043232//intracellular non-membrane-bounded organelle;GO:0005856//cytoskeleton;GO:0005623//cell;GO:0005622//intracellular;GO:0043229//intracellular organelle	GO:0003674//molecular_function;GO:0036094//small molecule binding;GO:0000166//nucleotide binding;GO:0005198//structural molecule activity;GO:1901265//nucleoside phosphate binding;GO:0003824//catalytic activity;GO:0016787//hydrolase activity;GO:1901363//heterocyclic compound binding;GO:0005488//binding;GO:0097159//organic cyclic compound binding	GO:0009987//cellular process;GO:0008150//biological_process;GO:0016043//cellular component organization;GO:0071840//cellular component organization or biogenesis
Bra002261	2757.44	931.063	240.087	81.2067	-1.56389	3.31189e-10	2.09924e-08	yes	AT5G19770 (E=6e-236) TUA3 | TUA3; structural constituent of cytoskeleton	GO:0043229//intracellular organelle;GO:0043228//non-membrane-bounded organelle;GO:0043232//intracellular non-membrane-bounded organelle;GO:0005623//cell;GO:0043226//organelle;GO:0005622//intracellular;GO:0044424//intracellular part;GO:0005575//cellular_component;GO:0005856//cytoskeleton;GO:0044464//cell part	GO:0000166//nucleotide binding;GO:0005488//binding;GO:0005198//structural molecule activity;GO:0003824//catalytic activity;GO:0016787//hydrolase activity;GO:0003674//molecular_function;GO:1901363//heterocyclic compound binding;GO:0036094//small molecule binding;GO:1901265//nucleoside phosphate binding;GO:0097159//organic cyclic compound binding	GO:0016043//cellular component organization;GO:0009987//cellular process;GO:0008150//biological_process;GO:0071840//cellular component organization or biogenesis
Bra002267	39.29	2.33333	3.37	0.2	-4.07468	6.43946e-11	4.47206e-09	yes	AT3G26010 (E=3e-100) | F-box family protein	-	GO:0005488//binding;GO:0003674//molecular_function;GO:0005515//protein binding	-
Bra002281	243	842.333	13.09	43.7667	1.74137	1.77522e-14	1.84727e-12	yes	-	-	-	-
Bra002290	589.44	2082.67	101.41	340.107	1.74579	1.31548e-14	1.39615e-12	yes	AT5G20290 (E=4e-087) | 40S ribosomal protein S8 (RPS8A)	GO:0005622//intracellular;GO:0043228//non-membrane-bounded organelle;GO:0044444//cytoplasmic part;GO:0044424//intracellular part;GO:0043226//organelle;GO:0005737//cytoplasm;GO:0043229//intracellular organelle;GO:1990904//ribonucleoprotein complex;GO:0043232//intracellular non-membrane-bounded organelle;GO:0005575//cellular_component;GO:0005840//ribosome;GO:0030529//intracellular ribonucleoprotein…	GO:0003674//molecular_function;GO:0005198//structural molecule activity	GO:0043603//cellular amide metabolic process;GO:0009058//biosynthetic process;GO:1901576//organic substance biosynthetic process;GO:0019538//protein metabolic process;GO:0009987//cellular process;GO:0043170//macromolecule metabolic process;GO:0043043//peptide biosynthetic process;GO:0008152//metabolic process;GO:0034641//cellular nitrogen compound metabolic process;GO:0044238//primary metabolic p…
Bra002320	31	74.3333	2.23667	4.99	1.15769	0.00375538	0.04117	yes	-	-	-	-
Bra002334	109	38.6667	12.3167	4.24333	-1.53734	1.48206e-05	0.000379677	yes	AT5G20850 (E=1e-189) ATRAD51, RAD51 | ATRAD51; ATP binding / DNA binding / DNA-dependent ATPase/ damaged DNA binding / nucleoside-triphosphatase/ nucleotide binding / protein binding / sequence-specific DNA binding	-	GO:0016787//hydrolase activity;GO:0097159//organic cyclic compound binding;GO:0000166//nucleotide binding;GO:1901265//nucleoside phosphate binding;GO:0036094//small molecule binding;GO:0003676//nucleic acid binding;GO:1901363//heterocyclic compound binding;GO:0005488//binding;GO:0003677//DNA binding;GO:0003824//catalytic activity;GO:0003674//molecular_function	GO:0071704//organic substance metabolic process;GO:0046483//heterocycle metabolic process;GO:0044238//primary metabolic process;GO:0006259//DNA metabolic process;GO:0090304//nucleic acid metabolic process;GO:0044260//cellular macromolecule metabolic process;GO:0034641//cellular nitrogen compound metabolic process;GO:0006725//cellular aromatic compound metabolic process;GO:0009058//biosynthetic pr…
Bra002347	0	11.3333	0.001	0.326667	8.35168	5.31298e-07	1.87545e-05	yes	AT5G20960 (E=0.0) AAO1, AO1, ATAO, ATAO1 | AAO1 (ARABIDOPSIS ALDEHYDE OXIDASE 1); aldehyde oxidase/ indole-3-acetaldehyde oxidase	-	GO:0036094//small molecule binding;GO:0003674//molecular_function;GO:0005488//binding;GO:1901363//heterocyclic compound binding;GO:0000166//nucleotide binding;GO:1901265//nucleoside phosphate binding;GO:0097159//organic cyclic compound binding;GO:0003824//catalytic activity	GO:0008152//metabolic process;GO:0008150//biological_process
Bra002349	1234.67	2843.99	28.0933	64.78	1.20532	0.00117219	0.0159077	yes	AT5G20980 (E=0.0) ATMS3 | ATMS3 (methionine synthase 3); 5-methyltetrahydropteroyltriglutamate-homocysteine S-methyltransferase/ methionine synthase	-	GO:0097159//organic cyclic compound binding;GO:0005488//binding;GO:0016740//transferase activity;GO:0003676//nucleic acid binding;GO:0003824//catalytic activity;GO:0005515//protein binding;GO:0003674//molecular_function;GO:1901363//heterocyclic compound binding	GO:0009058//biosynthetic process;GO:0008152//metabolic process;GO:0009987//cellular process;GO:0008150//biological_process
Bra002355	1686.33	699.667	115.28	45.7733	-1.33256	8.54762e-10	5.05671e-08	yes	AT5G21100 (E=1e-267) | L-ascorbate oxidase, putative	GO:0005576//extracellular region;GO:0005575//cellular_component	GO:0003824//catalytic activity;GO:0003674//molecular_function;GO:0005488//binding	GO:0008150//biological_process;GO:0008152//metabolic process
Bra002396	111.667	324.333	20.8867	58.1367	1.47687	7.085e-07	2.44689e-05	yes	-	-	-	-
Bra002400	240.333	545.667	33.5267	73.15	1.12555	8.15841e-05	0.00167715	yes	AT5G22250 (E=6e-131) | CCR4-NOT transcription complex protein, putative	GO:0005623//cell;GO:0005634//nucleus;GO:0043226//organelle;GO:0044424//intracellular part;GO:0043231//intracellular membrane-bounded organelle;GO:0043229//intracellular organelle;GO:0005622//intracellular;GO:0044464//cell part;GO:0005575//cellular_component;GO:0043227//membrane-bounded organelle	GO:1901363//heterocyclic compound binding;GO:0003674//molecular_function;GO:0097159//organic cyclic compound binding;GO:0003676//nucleic acid binding;GO:0005488//binding	-
Bra002416	1.33333	33.3333	0.103333	2.55333	4.627	4.87719e-12	3.90493e-10	yes	AT5G22500 (E=6e-239) FAR1 | FAR1 (FATTY ACID REDUCTASE 1); fatty acyl-CoA reductase (alcohol-forming)/ oxidoreductase, acting on the CH-CH group of donors	-	GO:0003674//molecular_function;GO:0003824//catalytic activity	-
Bra002422	44.3333	123.667	15.5167	41.28	1.41162	3.76462e-05	0.000856584	yes	-	-	-	-
Bra002447	451	77.6667	52.0733	9.38	-2.47288	0.00233282	0.0279536	yes	AT5G22990 (E=7e-097) | zinc finger (C2H2 type) family protein	-	GO:0001071//nucleic acid binding transcription factor activity;GO:0003700//transcription factor activity, sequence-specific DNA binding;GO:0003674//molecular_function;GO:0005488//binding	GO:0006807//nitrogen compound metabolic process;GO:0006725//cellular aromatic compound metabolic process;GO:0006139//nucleobase-containing compound metabolic process;GO:0046483//heterocycle metabolic process;GO:0008150//biological_process;GO:0009058//biosynthetic process;GO:0044238//primary metabolic process;GO:0009987//cellular process;GO:1901360//organic cyclic compound metabolic process;GO:004…
Bra002480	165.667	57.6667	22.57	7.89	-1.51631	0.000381395	0.00622111	yes	AT5G60440 (E=1e-049) AGL62 | AGL62 (Agamous-like 62); DNA binding / transcription factor	GO:0005622//intracellular;GO:0005623//cell;GO:0043231//intracellular membrane-bounded organelle;GO:0043227//membrane-bounded organelle;GO:0044424//intracellular part;GO:0044464//cell part;GO:0043226//organelle;GO:0005634//nucleus;GO:0005575//cellular_component;GO:0043229//intracellular organelle	GO:0005488//binding;GO:1901363//heterocyclic compound binding;GO:0003677//DNA binding;GO:0005515//protein binding;GO:0003674//molecular_function;GO:0097159//organic cyclic compound binding;GO:0003676//nucleic acid binding	GO:1901360//organic cyclic compound metabolic process;GO:0008152//metabolic process;GO:0071704//organic substance metabolic process;GO:0009987//cellular process;GO:0006139//nucleobase-containing compound metabolic process;GO:0008150//biological_process;GO:0006807//nitrogen compound metabolic process;GO:0009058//biosynthetic process;GO:0044238//primary metabolic process;GO:0034641//cellular nitrog…
Bra002525	4.66667	0	1.91667	0.001	-10.9044	0.00129492	0.0172482	yes	-	-	-	-
Bra002578	112.55	21	11.9533	2.12	-2.49528	0.000124426	0.00240466	yes	AT4G17200 (E=8e-097) | F-box family protein	-	GO:0005515//protein binding;GO:0005488//binding;GO:0003674//molecular_function	-
Bra002622	28.6667	95.3333	3.26667	10.0367	1.61939	0.000278513	0.00476815	yes	AT5G58730 (E=1e-155) | pfkB-type carbohydrate kinase family protein	-	GO:1901363//heterocyclic compound binding;GO:0016740//transferase activity;GO:0003674//molecular_function;GO:0036094//small molecule binding;GO:1901265//nucleoside phosphate binding;GO:0016301//kinase activity;GO:0016772//transferase activity, transferring phosphorus-containing groups;GO:0097159//organic cyclic compound binding;GO:0000166//nucleotide binding;GO:0003824//catalytic activity;GO:0005…	GO:0009987//cellular process;GO:0009058//biosynthetic process;GO:0008150//biological_process;GO:0008152//metabolic process
Bra002635	0	4.66667	0.001	0.353333	8.46489	0.000947932	0.0133935	yes	AT1G07150 (E=5e-097) MAPKKK13 | MAPKKK13; ATP binding / kinase/ protein kinase/ protein serine/threonine kinase	-	GO:0016740//transferase activity;GO:0003824//catalytic activity;GO:0000166//nucleotide binding;GO:0016301//kinase activity;GO:0003674//molecular_function;GO:0036094//small molecule binding;GO:0016772//transferase activity, transferring phosphorus-containing groups;GO:1901265//nucleoside phosphate binding;GO:0005488//binding;GO:0097159//organic cyclic compound binding;GO:1901363//heterocyclic comp…	GO:0071704//organic substance metabolic process;GO:0044260//cellular macromolecule metabolic process;GO:0008152//metabolic process;GO:0043170//macromolecule metabolic process;GO:0008150//biological_process;GO:0036211//protein modification process;GO:0044238//primary metabolic process;GO:0043412//macromolecule modification;GO:0019538//protein metabolic process;GO:0044267//cellular protein metaboli…
Bra002658	32.6667	74.5733	2.28333	5.19	1.18459	0.00262762	0.0307479	yes	AT5G58350 (E=2e-243) WNK4, ZIK2 | WNK4 (WITH NO K (=LYSINE) 4); kinase/ protein kinase	-	GO:0036094//small molecule binding;GO:0003674//molecular_function;GO:0005488//binding;GO:1901265//nucleoside phosphate binding;GO:0016301//kinase activity;GO:0003824//catalytic activity;GO:0097159//organic cyclic compound binding;GO:0016772//transferase activity, transferring phosphorus-containing groups;GO:0016740//transferase activity;GO:1901363//heterocyclic compound binding;GO:0000166//nucleo…	GO:0044237//cellular metabolic process;GO:0043170//macromolecule metabolic process;GO:0036211//protein modification process;GO:0019538//protein metabolic process;GO:0043412//macromolecule modification;GO:0008152//metabolic process;GO:0008150//biological_process;GO:0044267//cellular protein metabolic process;GO:0006464//cellular protein modification process;GO:0009987//cellular process;GO:0044238/…
Bra002676	102.667	49.6667	5.33667	2.42667	-1.13696	0.00309012	0.0350184	yes	AT5G58170 (E=0.0) SVL5 | SVL5 (SHV3-LIKE 5); glycerophosphodiester phosphodiesterase/ phosphoric diester hydrolase	-	GO:0003824//catalytic activity;GO:0003674//molecular_function;GO:0016787//hydrolase activity	GO:0008150//biological_process;GO:0071704//organic substance metabolic process;GO:0005975//carbohydrate metabolic process;GO:0009987//cellular process;GO:0044238//primary metabolic process;GO:0044699//single-organism process;GO:0008152//metabolic process;GO:0006629//lipid metabolic process;GO:0044710//single-organism metabolic process
Bra002697	8.33333	0.666667	2.02333	0.146667	-3.78612	0.000343295	0.00568463	yes	AT5G57780 (E=1e-067) | EXPRESSED IN: 18 plant structures; EXPRESSED DURING: 12 growth stages; BEST Arabidopsis thaliana protein match is: transcription factor (TAIR:AT4G30410.2); Has 70 Blast hits to 70 proteins in 6 species: Archae - 0; Bacteria - 0; Metazoa - 0; Fungi - 0; Plants - 70; Viruses - 0; Other Eukaryotes - 0 (source: NCBI BLink).	-	GO:0005488//binding;GO:0005515//protein binding;GO:0003674//molecular_function	-
Bra002711	57.3333	23.6667	10.9	4.49667	-1.2774	0.00439369	0.0465697	yes	-	-	-	-
Bra002712	181	30.3333	17.2333	3.04333	-2.50148	3.988e-09	2.11981e-07	yes	AT5G57630 (E=2e-191) CIPK21, SnRK3.4 | CIPK21 (CBL-interacting protein kinase 21); ATP binding / kinase/ protein kinase/ protein serine/threonine kinase	-	GO:0016301//kinase activity;GO:0000166//nucleotide binding;GO:0036094//small molecule binding;GO:0003824//catalytic activity;GO:0003674//molecular_function;GO:0016740//transferase activity;GO:1901363//heterocyclic compound binding;GO:0097159//organic cyclic compound binding;GO:1901265//nucleoside phosphate binding;GO:0005488//binding;GO:0016772//transferase activity, transferring phosphorus-conta…	GO:0044763//single-organism cellular process;GO:0044237//cellular metabolic process;GO:0044260//cellular macromolecule metabolic process;GO:0009987//cellular process;GO:0008150//biological_process;GO:0043412//macromolecule modification;GO:0044700//single organism signaling;GO:0044238//primary metabolic process;GO:0044699//single-organism process;GO:0071704//organic substance metabolic process;GO:…
Bra002764	57.6667	165.667	3.95667	10.9267	1.4655	2.632e-05	0.000630773	yes	-	-	-	-
Bra002860	457.333	64	64.5533	8.64	-2.90139	2.35111e-15	2.65401e-13	yes	-	-	-	-
Bra002895	4.33333	16	0.4	1.43	1.83794	0.00427537	0.0455725	yes	AT2G21950 (E=1e-042) SKIP6 | SKIP6 (SKP1 interacting partner 6); ubiquitin-protein ligase	-	GO:0003674//molecular_function;GO:0005515//protein binding;GO:0005488//binding	-
Bra002916	59.6667	20.6667	6.78667	2.21333	-1.61648	0.000107415	0.00212344	yes	-	-	-	-
Bra002919	47.3333	203.667	4.81333	19.7267	2.03504	6.18864e-10	3.73729e-08	yes	AT5G55250 (E=2e-214) IAMT1 | IAMT1 (IAA CARBOXYLMETHYLTRANSFERASE 1); S-adenosylmethionine-dependent methyltransferase/ indole acetic acid carboxyl methyltransferase	-	GO:0003674//molecular_function;GO:0005515//protein binding;GO:0003824//catalytic activity;GO:0005488//binding;GO:0016740//transferase activity	GO:0044767//single-organism developmental process;GO:0008152//metabolic process;GO:0044238//primary metabolic process;GO:0044699//single-organism process;GO:0044707//single-multicellular organism process;GO:0009058//biosynthetic process;GO:0007275//multicellular organism development;GO:0032502//developmental process;GO:0009987//cellular process;GO:0008150//biological_process;GO:0071704//organic s…
Bra002975	2.33333	11.6667	0.706667	3.29	2.21899	0.00445039	0.0469073	yes	-	-	-	-
Bra002994	24	4.33333	3.49667	0.636667	-2.45737	9.16135e-06	0.000247395	yes	-	-	-	-
Bra003025	5	0	0.71	0.001	-9.47168	0.000880614	0.0126153	yes	-	-	-	-
Bra003177	330.583	21	53.48	3.53	-3.92126	6.52996e-26	1.86256e-23	yes	AT3G54300 (E=2e-125) ATVAMP727, VAMP727 | ATVAMP727 (VESICLE-ASSOCIATED MEMBRANE PROTEIN 727)	GO:0016020//membrane;GO:0005575//cellular_component	-	GO:0006810//transport;GO:0051179//localization;GO:0051234//establishment of localization;GO:0008150//biological_process
Bra003210	13	61.3333	3.06	13.5467	2.14633	1.2612e-06	4.1451e-05	yes	AT3G55380 (E=8e-085) UBC14 | UBC14 (ubiquitin-conjugating enzyme 14); ubiquitin-protein ligase	-	GO:0003824//catalytic activity;GO:0003674//molecular_function	-
Bra003212	26.3333	6.66667	2.26333	0.58	-1.96432	0.000165279	0.00306442	yes	AT3G55430 (E=7e-224) | glycosyl hydrolase family 17 protein / beta-1,3-glucanase, putative	-	GO:0003674//molecular_function;GO:0016787//hydrolase activity;GO:0003824//catalytic activity	GO:0071704//organic substance metabolic process;GO:0008152//metabolic process;GO:0044238//primary metabolic process;GO:0005975//carbohydrate metabolic process;GO:0008150//biological_process
Bra003219	5	55.6667	0.66	7.48	3.5025	1.62974e-09	9.18229e-08	yes	-	-	-	-
Bra003221	1.33333	16	0.163333	1.79333	3.45675	5.80792e-05	0.00124523	yes	AT3G55800 (E=3e-144) SBPASE | SBPASE (sedoheptulose-bisphosphatase); phosphoric ester hydrolase/ sedoheptulose-bisphosphatase	-	GO:0003674//molecular_function;GO:0003824//catalytic activity;GO:0016787//hydrolase activity	GO:0071704//organic substance metabolic process;GO:0044238//primary metabolic process;GO:0008150//biological_process;GO:0008152//metabolic process;GO:0005975//carbohydrate metabolic process
Bra003279	18.3333	61	3.59	12.16	1.76009	0.00337057	0.0376976	yes	AT3G57390 (E=7e-063) AGL18 | AGL18; transcription factor	GO:0043226//organelle;GO:0043231//intracellular membrane-bounded organelle;GO:0005575//cellular_component;GO:0043229//intracellular organelle;GO:0044464//cell part;GO:0005634//nucleus;GO:0005623//cell;GO:0044424//intracellular part;GO:0043227//membrane-bounded organelle;GO:0005622//intracellular	GO:0003674//molecular_function;GO:0003700//transcription factor activity, sequence-specific DNA binding;GO:0001071//nucleic acid binding transcription factor activity	GO:0006725//cellular aromatic compound metabolic process;GO:0008152//metabolic process;GO:1901360//organic cyclic compound metabolic process;GO:0006139//nucleobase-containing compound metabolic process;GO:0034641//cellular nitrogen compound metabolic process;GO:0009058//biosynthetic process;GO:0006807//nitrogen compound metabolic process;GO:0071704//organic substance metabolic process;GO:0009987/…
Bra003340	254.333	580.333	31.91	70.5067	1.14375	2.84967e-07	1.05978e-05	yes	AT3G58500 (E=3e-186) PP2A-3, EP7 | PP2A-3 (PROTEIN PHOSPHATASE 2A-3); protein serine/threonine phosphatase	-	GO:0016787//hydrolase activity;GO:0003674//molecular_function;GO:0003824//catalytic activity	GO:0036211//protein modification process;GO:0043412//macromolecule modification;GO:0044238//primary metabolic process;GO:0009987//cellular process;GO:0071704//organic substance metabolic process;GO:0008150//biological_process;GO:0019538//protein metabolic process;GO:0008152//metabolic process;GO:0043170//macromolecule metabolic process;GO:0044267//cellular protein metabolic process;GO:0006464//ce…
Bra003358	51	116	5.93667	12.9433	1.12448	0.000457519	0.00725715	yes	-	-	-	-
Bra003376	143.667	7	27.55	1.35667	-4.34391	6.53344e-25	1.75393e-22	yes	AT3G59440 (E=4e-097) | calcium-binding protein, putative	-	GO:0005488//binding;GO:0003674//molecular_function	-
Bra003387	71	174.667	8.21	19.5367	1.25073	1.58096e-05	0.000401156	yes	AT2G43770 (E=7e-183) | transducin family protein / WD-40 repeat family protein	-	GO:0005488//binding;GO:0003674//molecular_function;GO:0005515//protein binding	-
Bra003396	60.3333	13.3333	8.88667	2.01667	-2.13967	0.000777261	0.011364	yes	AT3G59960 (E=2e-067) ASHH4, SDG24 | ASHH4 (HISTONE-LYSINE N-METHYLTRANSFERASE ASHH4); histone-lysine N-methyltransferase	GO:0043227//membrane-bounded organelle;GO:0044424//intracellular part;GO:0043229//intracellular organelle;GO:0005623//cell;GO:0044464//cell part;GO:0043231//intracellular membrane-bounded organelle;GO:0005575//cellular_component;GO:0005622//intracellular;GO:0043226//organelle;GO:0005634//nucleus	GO:0005515//protein binding;GO:0003824//catalytic activity;GO:0003674//molecular_function;GO:0016740//transferase activity;GO:0005488//binding	GO:0009987//cellular process;GO:0008150//biological_process;GO:0019538//protein metabolic process;GO:0044267//cellular protein metabolic process;GO:0006464//cellular protein modification process;GO:0044238//primary metabolic process;GO:0044237//cellular metabolic process;GO:0044260//cellular macromolecule metabolic process;GO:0016043//cellular component organization;GO:0036211//protein modificati…
Bra003401	175.333	61.3333	13.3267	4.55	-1.55038	3.03894e-07	1.12566e-05	yes	AT3G60130 (E=2e-263) BGLU16 | BGLU16 (BETA GLUCOSIDASE 16); catalytic/ cation binding / hydrolase, hydrolyzing O-glycosyl compounds	-	GO:0003674//molecular_function;GO:0003824//catalytic activity;GO:0016787//hydrolase activity	GO:0008152//metabolic process;GO:0071704//organic substance metabolic process;GO:0005975//carbohydrate metabolic process;GO:0008150//biological_process;GO:0044238//primary metabolic process
Bra003428	825.667	214.333	143.997	36.2267	-1.99091	1.5188e-18	2.32151e-16	yes	AT3G60820 (E=5e-121) PBF1 | PBF1; peptidase/ threonine-type endopeptidase	GO:0043226//organelle;GO:0005623//cell;GO:0044464//cell part;GO:0005575//cellular_component;GO:0043229//intracellular organelle;GO:0005622//intracellular;GO:0005634//nucleus;GO:0044424//intracellular part;GO:0005737//cytoplasm;GO:0043227//membrane-bounded organelle;GO:0043231//intracellular membrane-bounded organelle	GO:0016787//hydrolase activity;GO:0003674//molecular_function;GO:0003824//catalytic activity	GO:0009987//cellular process;GO:0008150//biological_process;GO:0071704//organic substance metabolic process;GO:0044238//primary metabolic process;GO:0043170//macromolecule metabolic process;GO:0008152//metabolic process;GO:0009056//catabolic process;GO:0019538//protein metabolic process
Bra003432	13.6667	65	1.3	5.79333	2.15588	4.09369e-05	0.000922263	yes	-	-	-	-
Bra003433	15.3333	1.66667	2.63667	0.266667	-3.30561	1.54323e-05	0.000393141	yes	AT3G60910 (E=4e-067) | catalytic/ methyltransferase	-	GO:0003824//catalytic activity;GO:0016740//transferase activity;GO:0003674//molecular_function	GO:0008152//metabolic process;GO:0008150//biological_process
Bra003461	62.3333	23.0767	15.6067	5.53333	-1.49594	9.12453e-05	0.0018531	yes	-	-	-	-
Bra003480	14.6667	158.667	1.27333	13.5867	3.41551	4.5956e-18	6.7037e-16	yes	-	-	-	-
Bra003526	654.333	1593	28.3967	66.42	1.2259	6.30624e-08	2.7298e-06	yes	AT3G45140 (E=0.0) LOX2, ATLOX2 | LOX2 (LIPOXYGENASE 2); lipoxygenase	-	GO:0003674//molecular_function;GO:0005515//protein binding;GO:0005488//binding;GO:0003824//catalytic activity	GO:0044710//single-organism metabolic process;GO:0006629//lipid metabolic process;GO:0044699//single-organism process;GO:0044238//primary metabolic process;GO:0008150//biological_process;GO:0008152//metabolic process;GO:0009058//biosynthetic process;GO:0009987//cellular process;GO:0071704//organic substance metabolic process
Bra003535	803.333	87.6667	42.3367	4.48667	-3.23819	1.37844e-23	3.33604e-21	yes	AT1G79840 (E=0.0) GL2 | GL2 (GLABRA 2); DNA binding / transcription factor	GO:0044424//intracellular part;GO:0005622//intracellular;GO:0044464//cell part;GO:0043229//intracellular organelle;GO:0005623//cell;GO:0005634//nucleus;GO:0043226//organelle;GO:0043227//membrane-bounded organelle;GO:0005575//cellular_component;GO:0043231//intracellular membrane-bounded organelle	GO:0097159//organic cyclic compound binding;GO:0008289//lipid binding;GO:0001071//nucleic acid binding transcription factor activity;GO:0005488//binding;GO:0003700//transcription factor activity, sequence-specific DNA binding;GO:0003677//DNA binding;GO:1901363//heterocyclic compound binding;GO:0003674//molecular_function;GO:0003676//nucleic acid binding	GO:0006807//nitrogen compound metabolic process;GO:0044237//cellular metabolic process;GO:0071704//organic substance metabolic process;GO:0006139//nucleobase-containing compound metabolic process;GO:0006725//cellular aromatic compound metabolic process;GO:0009058//biosynthetic process;GO:0009987//cellular process;GO:0008152//metabolic process;GO:0008150//biological_process;GO:0044238//primary met…
Bra003549	16.1933	3.14667	1.28333	0.22	-2.54432	0.000658885	0.00989598	yes	AT1G80080 (E=2e-207) TMM, AtRLP17 | TMM (TOO MANY MOUTHS); protein binding / receptor	GO:0016020//membrane;GO:0005575//cellular_component	GO:0060089//molecular transducer activity;GO:0003674//molecular_function;GO:0005488//binding;GO:0005515//protein binding;GO:0004872//receptor activity	GO:0009653//anatomical structure morphogenesis;GO:0048856//anatomical structure development;GO:0044700//single organism signaling;GO:0009908//flower development;GO:0023052//signaling;GO:0032501//multicellular organismal process;GO:0051716//cellular response to stimulus;GO:0009719//response to endogenous stimulus;GO:0000003//reproduction;GO:0044702//single organism reproductive process;GO:0061458/…
Bra003570	22.3333	6	1.89667	0.47	-2.01273	0.000249445	0.00433321	yes	AT1G80510 (E=4e-158) | amino acid transporter family protein	GO:0016020//membrane;GO:0005575//cellular_component	-	-
Bra003571	5.33333	24.3333	1.10333	4.87667	2.14403	0.000106705	0.00211202	yes	-	-	-	-
Bra003583	498.667	217.667	73.49	32.51	-1.17666	0.000424229	0.00681711	yes	-	-	-	-
Bra003592	2314.33	1066.67	548.713	254.887	-1.1062	0.000105844	0.00209627	yes	-	-	-	-
Bra003609	206	95.3333	9.77	4.5	-1.11843	0.000132392	0.00253409	yes	AT1G79490 (E=0.0) EMB2217 | EMB2217 (embryo defective 2217)	GO:0005575//cellular_component;GO:0043229//intracellular organelle;GO:0043227//membrane-bounded organelle;GO:0005622//intracellular;GO:0005623//cell;GO:0044424//intracellular part;GO:0043231//intracellular membrane-bounded organelle;GO:0044444//cytoplasmic part;GO:0005737//cytoplasm;GO:0005739//mitochondrion;GO:0043226//organelle;GO:0044464//cell part	GO:0005488//binding;GO:0005515//protein binding;GO:0003674//molecular_function	GO:0007275//multicellular organism development;GO:0008150//biological_process;GO:0032501//multicellular organismal process;GO:0032502//developmental process;GO:0044767//single-organism developmental process;GO:0009987//cellular process;GO:0044707//single-multicellular organism process;GO:0044699//single-organism process;GO:0000003//reproduction;GO:0030154//cell differentiation;GO:0044763//single-…
Bra003615	22.3333	57.9633	1.71	4.4	1.36351	0.0017199	0.0217599	yes	AT1G79270 (E=2e-210) ECT8 | ECT8 (evolutionarily conserved C-terminal region 8)	-	GO:0097159//organic cyclic compound binding;GO:0003723//RNA binding;GO:1901363//heterocyclic compound binding;GO:0003674//molecular_function;GO:0003676//nucleic acid binding;GO:0005488//binding	-
Bra003635	76	2	6.94667	0.166667	-5.38128	8.04228e-13	7.04149e-11	yes	-	-	-	-
Bra003650	15.3333	4	1.25	0.316667	-1.98089	0.0010319	0.0143389	yes	AT1G78290 (E=1e-155) | serine/threonine protein kinase, putative	GO:0044424//intracellular part;GO:0043229//intracellular organelle;GO:0005622//intracellular;GO:0043231//intracellular membrane-bounded organelle;GO:0043226//organelle;GO:0044464//cell part;GO:0005623//cell;GO:0005575//cellular_component;GO:0005634//nucleus;GO:0005737//cytoplasm;GO:0043227//membrane-bounded organelle	GO:1901265//nucleoside phosphate binding;GO:1901363//heterocyclic compound binding;GO:0000166//nucleotide binding;GO:0003674//molecular_function;GO:0016301//kinase activity;GO:0036094//small molecule binding;GO:0003824//catalytic activity;GO:0005488//binding;GO:0016740//transferase activity;GO:0097159//organic cyclic compound binding;GO:0016772//transferase activity, transferring phosphorus-conta…	GO:0006950//response to stress;GO:0008150//biological_process;GO:0036211//protein modification process;GO:0043412//macromolecule modification;GO:0009628//response to abiotic stimulus;GO:0044238//primary metabolic process;GO:0044260//cellular macromolecule metabolic process;GO:0009987//cellular process;GO:0044267//cellular protein metabolic process;GO:0008152//metabolic process;GO:0050896//respons…
Bra003655	65.6667	1.66667	11.07	0.29	-5.25446	2.73802e-10	1.75288e-08	yes	-	-	-	-
Bra003658	7.66667	1	0.87	0.123333	-2.81845	0.00228685	0.0274956	yes	-	-	-	-
Bra003661	0.333333	43	0.09	10.38	6.84967	1.35199e-14	1.42544e-12	yes	-	-	-	-
Bra003670	50	15.3333	2.13333	0.626667	-1.76734	9.92333e-05	0.00199002	yes	AT1G77760 (E=0.0) NIA1, GNR1, NR1 | NIA1 (NITRATE REDUCTASE 1); nitrate reductase	-	GO:0097159//organic cyclic compound binding;GO:0005488//binding;GO:0036094//small molecule binding;GO:0003824//catalytic activity;GO:0003674//molecular_function;GO:1901265//nucleoside phosphate binding;GO:1901363//heterocyclic compound binding;GO:0000166//nucleotide binding	GO:0009987//cellular process;GO:0008152//metabolic process;GO:0009058//biosynthetic process;GO:0008150//biological_process
Bra003692	194.667	64.3333	21.0233	6.86	-1.61571	4.58734e-08	2.03821e-06	yes	AT1G77000 (E=2e-185) ATSKP2;2, SKP2B | SKP2B; ubiquitin-protein ligase	-	GO:0003674//molecular_function;GO:0005515//protein binding;GO:0005488//binding	-
Bra003713	226.333	38	39.95	6.50667	-2.6182	8.07893e-12	6.24914e-10	yes	-	-	-	-
Bra003728	68.3333	218	6.48	19.4133	1.58298	1.68321e-06	5.32923e-05	yes	-	-	-	-
Bra003733	47.3333	413.333	4.16667	35.7867	3.10246	1.18692e-26	3.57712e-24	yes	AT1G76010 (E=5e-085) | nucleic acid binding	-	GO:0003676//nucleic acid binding;GO:0003674//molecular_function;GO:0005488//binding;GO:0097159//organic cyclic compound binding;GO:1901363//heterocyclic compound binding	-
Bra003736	3925	1984.33	422.457	209.547	-1.01153	6.52605e-07	2.28348e-05	yes	AT1G75900 (E=8e-163) | family II extracellular lipase 3 (EXL3)	-	GO:0003674//molecular_function;GO:0016787//hydrolase activity;GO:0003824//catalytic activity	GO:0044710//single-organism metabolic process;GO:0044238//primary metabolic process;GO:0071704//organic substance metabolic process;GO:0006629//lipid metabolic process;GO:0044699//single-organism process;GO:0008150//biological_process;GO:0008152//metabolic process
Bra003739	91	7.66667	18.21	1.56667	-3.53896	2.21771e-15	2.52124e-13	yes	AT1G75840 (E=2e-099) ARAC5, ATGP3, ROP4, ATROP4 | ARAC5 (RAC-LIKE GTP BINDING PROTEIN 5); GTP binding / GTPase	GO:0005622//intracellular;GO:0005623//cell;GO:0005575//cellular_component;GO:0044464//cell part;GO:0016020//membrane	GO:0005488//binding;GO:0036094//small molecule binding;GO:0097159//organic cyclic compound binding;GO:0003674//molecular_function;GO:0000166//nucleotide binding;GO:1901265//nucleoside phosphate binding;GO:1901363//heterocyclic compound binding	GO:0050896//response to stimulus;GO:0050789//regulation of biological process;GO:0007154//cell communication;GO:0044763//single-organism cellular process;GO:0044700//single organism signaling;GO:0051716//cellular response to stimulus;GO:0009987//cellular process;GO:0008150//biological_process;GO:0065007//biological regulation;GO:0044699//single-organism process;GO:0050794//regulation of cellular …
Bra003773	4	0	1.44	0.001	-10.4919	0.00285902	0.0330442	yes	AT1G64105 (E=8e-023) ANAC027 | ANAC027 (Arabidopsis NAC domain containing protein 27); transcription factor	GO:0005634//nucleus;GO:0043231//intracellular membrane-bounded organelle;GO:0043229//intracellular organelle;GO:0043227//membrane-bounded organelle;GO:0005575//cellular_component;GO:0005622//intracellular;GO:0044464//cell part;GO:0005623//cell;GO:0044424//intracellular part;GO:0043226//organelle	GO:1901363//heterocyclic compound binding;GO:0003677//DNA binding;GO:0003676//nucleic acid binding;GO:0005488//binding;GO:0003674//molecular_function;GO:0097159//organic cyclic compound binding	GO:0044237//cellular metabolic process;GO:0071704//organic substance metabolic process;GO:0009987//cellular process;GO:1901360//organic cyclic compound metabolic process;GO:0008150//biological_process;GO:0044238//primary metabolic process;GO:0046483//heterocycle metabolic process;GO:0008152//metabolic process;GO:0009058//biosynthetic process;GO:0006139//nucleobase-containing compound metabolic pr…
Bra003780	13	44.6667	2.66333	8.6	1.6911	0.000355041	0.00584263	yes	AT1G74930 (E=3e-052) ORA47 | ORA47; DNA binding / transcription factor	GO:0043227//membrane-bounded organelle;GO:0005623//cell;GO:0005634//nucleus;GO:0043226//organelle;GO:0043231//intracellular membrane-bounded organelle;GO:0044424//intracellular part;GO:0005575//cellular_component;GO:0044464//cell part;GO:0043229//intracellular organelle;GO:0005622//intracellular	GO:0003700//transcription factor activity, sequence-specific DNA binding;GO:0097159//organic cyclic compound binding;GO:0003676//nucleic acid binding;GO:0003677//DNA binding;GO:1901363//heterocyclic compound binding;GO:0003674//molecular_function;GO:0005488//binding;GO:0001071//nucleic acid binding transcription factor activity	GO:0009987//cellular process;GO:0008150//biological_process;GO:0006807//nitrogen compound metabolic process;GO:0009058//biosynthetic process;GO:0044238//primary metabolic process;GO:1901360//organic cyclic compound metabolic process;GO:0034641//cellular nitrogen compound metabolic process;GO:0071704//organic substance metabolic process;GO:0046483//heterocycle metabolic process;GO:0008152//metabol…
Bra003787	59	18.6667	4.68333	1.39667	-1.74555	4.81224e-05	0.00106242	yes	AT1G74750 (E=9e-265) | pentatricopeptide (PPR) repeat-containing protein	-	GO:0003674//molecular_function;GO:0005488//binding;GO:0005515//protein binding	-
Bra003824	177.317	663.73	14.8033	52.0267	1.81333	1.53055e-11	1.13974e-09	yes	AT1G73880 (E=4e-237) UGT89B1 | UGT89B1 (UDP-GLUCOSYL TRANSFERASE 89B1); UDP-glycosyltransferase/ quercetin 3-O-glucosyltransferase/ quercetin 4'-O-glucosyltransferase/ quercetin 7-O-glucosyltransferase/ transferase, transferring glycosyl groups / transferase, transferring hexosyl group	-	GO:0003674//molecular_function;GO:0003824//catalytic activity;GO:0016740//transferase activity	GO:0008152//metabolic process;GO:0008150//biological_process
Bra003825	0	6.33333	0.001	0.253333	7.98489	0.000177466	0.00325637	yes	AT1G73860 (E=0.0) | ATP binding / microtubule motor	GO:0005622//intracellular;GO:0005575//cellular_component;GO:0005856//cytoskeleton;GO:0043228//non-membrane-bounded organelle;GO:0005623//cell;GO:0044464//cell part;GO:0044424//intracellular part;GO:0043232//intracellular non-membrane-bounded organelle;GO:0043226//organelle;GO:0043229//intracellular organelle	GO:0005515//protein binding;GO:1901363//heterocyclic compound binding;GO:1901265//nucleoside phosphate binding;GO:0016787//hydrolase activity;GO:0016817//hydrolase activity, acting on acid anhydrides;GO:0017111//nucleoside-triphosphatase activity;GO:0097159//organic cyclic compound binding;GO:0016462//pyrophosphatase activity;GO:0036094//small molecule binding;GO:0000166//nucleotide binding;GO:00…	GO:0008150//biological_process;GO:0009987//cellular process
Bra003834	7.66667	29.6667	0.593333	2.33	1.97342	0.000243418	0.00424931	yes	AT1G73670 (E=7e-252) ATMPK15 | ATMPK15; MAP kinase/ kinase	-	GO:0003674//molecular_function;GO:0000166//nucleotide binding;GO:0016740//transferase activity;GO:0016301//kinase activity;GO:0003824//catalytic activity;GO:0004871//signal transducer activity;GO:0036094//small molecule binding;GO:0016772//transferase activity, transferring phosphorus-containing groups;GO:1901363//heterocyclic compound binding;GO:0097159//organic cyclic compound binding;GO:000548…	GO:0036211//protein modification process;GO:0050789//regulation of biological process;GO:0043412//macromolecule modification;GO:0051716//cellular response to stimulus;GO:0007165//signal transduction;GO:0050896//response to stimulus;GO:0008150//biological_process;GO:0019538//protein metabolic process;GO:0044237//cellular metabolic process;GO:0009987//cellular process;GO:0043170//macromolecule meta…
Bra003835	8.33333	91.6667	1.35	14.36	3.41102	1.03546e-11	7.89473e-10	yes	AT1G73655 (E=3e-100) | FK506 binding / peptidyl-prolyl cis-trans isomerase	-	GO:0003674//molecular_function;GO:0003824//catalytic activity	GO:0044267//cellular protein metabolic process;GO:0044238//primary metabolic process;GO:0008150//biological_process;GO:0005975//carbohydrate metabolic process;GO:0043170//macromolecule metabolic process;GO:0071704//organic substance metabolic process;GO:0044237//cellular metabolic process;GO:0009987//cellular process;GO:0008152//metabolic process;GO:0044260//cellular macromolecule metabolic proce…
Bra003847	28.3333	6.33333	5	1.08667	-2.20202	5.4942e-05	0.00118673	yes	-	-	-	-
Bra003850	9	53.6667	1.79333	9.56	2.41437	0.000127408	0.00245487	yes	AT1G73260 (E=5e-079) | trypsin and protease inhibitor family protein / Kunitz family protein	-	GO:0003674//molecular_function;GO:0098772//molecular function regulator;GO:0030234//enzyme regulator activity	GO:0071704//organic substance metabolic process;GO:0044238//primary metabolic process;GO:0008152//metabolic process;GO:0009987//cellular process;GO:0043170//macromolecule metabolic process;GO:0008150//biological_process;GO:0019538//protein metabolic process
Bra003859	428	5.66667	82.27	0.943333	-6.44645	1.69822e-54	2.17006e-51	yes	AT1G73030 (E=7e-093) VPS46.2 | VPS46.2	-	-	GO:0006810//transport;GO:0051179//localization;GO:0051234//establishment of localization;GO:0008150//biological_process
Bra003860	11	0	0.64	0.001	-9.32193	3.05133e-06	9.1186e-05	yes	-	-	-	-
Bra003861	30.6667	82	1.75	4.71	1.42837	0.000301127	0.00508984	yes	AT1G72990 (E=3e-262) BGAL17 | BGAL17 (beta-galactosidase 17); beta-galactosidase/ catalytic/ cation binding	-	GO:0003824//catalytic activity;GO:0003674//molecular_function;GO:0016787//hydrolase activity	GO:0005975//carbohydrate metabolic process;GO:0009791//post-embryonic development;GO:0008150//biological_process;GO:0019538//protein metabolic process;GO:0043412//macromolecule modification;GO:0043170//macromolecule metabolic process;GO:0044237//cellular metabolic process;GO:0044238//primary metabolic process;GO:0007275//multicellular organism development;GO:0044767//single-organism developmental…
Bra003869	1151.33	155.333	83.85	10.89	-2.94481	7.11526e-29	2.31943e-26	yes	-	-	-	-
Bra003886	13	3.33333	1.55667	0.376667	-2.0471	0.00306198	0.0347859	yes	AT1G72210 (E=3e-123) | basic helix-loop-helix (bHLH) family protein (bHLH096)	-	GO:0005515//protein binding;GO:0005488//binding;GO:0003674//molecular_function	-
Bra003889	730	191.333	29.4	7.64333	-1.94354	8.84867e-16	1.0431e-13	yes	AT1G72180 (E=0.0) | leucine-rich repeat transmembrane protein kinase, putative	GO:0016020//membrane;GO:0005575//cellular_component	GO:0005488//binding;GO:1901265//nucleoside phosphate binding;GO:0005515//protein binding;GO:1901363//heterocyclic compound binding;GO:0016772//transferase activity, transferring phosphorus-containing groups;GO:0097159//organic cyclic compound binding;GO:0036094//small molecule binding;GO:0003824//catalytic activity;GO:0016301//kinase activity;GO:0003674//molecular_function;GO:0016740//transferase…	GO:0009987//cellular process;GO:0044267//cellular protein metabolic process;GO:0044260//cellular macromolecule metabolic process;GO:0043412//macromolecule modification;GO:0008150//biological_process;GO:0019538//protein metabolic process;GO:0044238//primary metabolic process;GO:0044237//cellular metabolic process;GO:0036211//protein modification process;GO:0071704//organic substance metabolic proc…
Bra003892	3	43.6667	0.226667	3.22	3.82842	4.75731e-12	3.81852e-10	yes	AT1G72150 (E=3e-181) PATL1 | PATL1 (PATELLIN 1); transporter	GO:0016020//membrane;GO:0005575//cellular_component	-	GO:0051234//establishment of localization;GO:0008150//biological_process;GO:0006810//transport;GO:0051179//localization
Bra003894	21	58	1.48333	4.17333	1.49236	0.00109893	0.0150736	yes	AT1G72140 (E=1e-244) | proton-dependent oligopeptide transport (POT) family protein	GO:0043227//membrane-bounded organelle;GO:0016020//membrane;GO:0044464//cell part;GO:0005773//vacuole;GO:0044444//cytoplasmic part;GO:0044424//intracellular part;GO:0005737//cytoplasm;GO:0005575//cellular_component;GO:0005622//intracellular;GO:0043231//intracellular membrane-bounded organelle;GO:0005623//cell;GO:0043229//intracellular organelle;GO:0043226//organelle	GO:0005215//transporter activity;GO:0003674//molecular_function	GO:0008150//biological_process;GO:0051234//establishment of localization;GO:0051179//localization;GO:0006810//transport
Bra003896	1.33333	15	0.103333	1.09333	3.40336	3.11672e-06	9.27928e-05	yes	AT1G72130 (E=1e-221) | proton-dependent oligopeptide transport (POT) family protein	GO:0016020//membrane;GO:0005575//cellular_component	GO:0005215//transporter activity;GO:0003674//molecular_function	GO:0006810//transport;GO:0051179//localization;GO:0008150//biological_process;GO:0051234//establishment of localization
Bra003897	1	17.6667	0.0733333	1.26	4.10281	1.27004e-06	4.16131e-05	yes	AT1G72130 (E=1e-205) | proton-dependent oligopeptide transport (POT) family protein	GO:0005575//cellular_component;GO:0016020//membrane	GO:0003674//molecular_function;GO:0005215//transporter activity	GO:0008150//biological_process;GO:0051179//localization;GO:0051234//establishment of localization;GO:0006810//transport
Bra003898	97.6667	4	6.81333	0.283333	-4.58779	1.279e-21	2.76074e-19	yes	AT1G72125 (E=1e-226) | transporter	GO:0005575//cellular_component;GO:0016020//membrane	GO:0003674//molecular_function;GO:0005215//transporter activity	GO:0006810//transport;GO:0008150//biological_process;GO:0051179//localization;GO:0051234//establishment of localization
Bra003899	136	35.3333	13.91	3.82	-1.86448	0.000251122	0.00435524	yes	AT1G72050 (E=8e-124) TFIIIA | TFIIIA (TRANSCRIPTION FACTOR IIIA); 5S rDNA binding / 5S rRNA binding / nucleic acid binding / transcription factor/ zinc ion binding	-	GO:0005488//binding;GO:0003676//nucleic acid binding;GO:1901363//heterocyclic compound binding;GO:0003674//molecular_function;GO:0097159//organic cyclic compound binding	-
Bra003906	43	413	3.27	29.1567	3.15646	1.41058e-18	2.16647e-16	yes	AT1G71880 (E=2e-229) SUC1, ATSUC1 | SUC1 (Sucrose-proton symporter 1); carbohydrate transmembrane transporter/ sucrose:hydrogen symporter/ sugar:hydrogen symporter	GO:0016020//membrane;GO:0005886//plasma membrane;GO:0044464//cell part;GO:0005623//cell;GO:0071944//cell periphery;GO:0005575//cellular_component	GO:0003674//molecular_function;GO:0005215//transporter activity	GO:0008150//biological_process;GO:0006810//transport;GO:0051179//localization;GO:0051234//establishment of localization;GO:0009987//cellular process
Bra003909	1624	325.333	131.743	26.4467	-2.31657	2.06545e-18	3.12715e-16	yes	AT2G46960 (E=8e-132) CYP709B1 | CYP709B1; electron carrier/ heme binding / iron ion binding / monooxygenase/ oxygen binding	-	GO:0003674//molecular_function;GO:0003824//catalytic activity;GO:0005488//binding	GO:0008150//biological_process;GO:0008152//metabolic process
Bra003962	147.667	32.6667	11.4433	2.60667	-2.13423	2.67767e-05	0.000640535	yes	AT1G70200 (E=2e-081) | RNA recognition motif (RRM)-containing protein	GO:0005575//cellular_component;GO:0005737//cytoplasm;GO:0043229//intracellular organelle;GO:0044444//cytoplasmic part;GO:0043226//organelle;GO:0043231//intracellular membrane-bounded organelle;GO:0005622//intracellular;GO:0005623//cell;GO:0044424//intracellular part;GO:0043227//membrane-bounded organelle;GO:0009536//plastid;GO:0044464//cell part	GO:0000166//nucleotide binding;GO:0003674//molecular_function;GO:0036094//small molecule binding;GO:0097159//organic cyclic compound binding;GO:0005488//binding;GO:1901265//nucleoside phosphate binding;GO:0003676//nucleic acid binding;GO:1901363//heterocyclic compound binding	GO:1901360//organic cyclic compound metabolic process;GO:0008152//metabolic process;GO:0034641//cellular nitrogen compound metabolic process;GO:0071840//cellular component organization or biogenesis;GO:0016043//cellular component organization;GO:0051179//localization;GO:0044238//primary metabolic process;GO:0006810//transport;GO:0009987//cellular process;GO:0046483//heterocycle metabolic process;…
Bra003965	2.66667	13.6667	0.273333	1.32333	2.27544	0.000819351	0.0118874	yes	AT1G70170 (E=5e-198) MMP | MMP (MATRIX METALLOPROTEINASE); metalloendopeptidase/ metallopeptidase	GO:0005575//cellular_component	GO:0016787//hydrolase activity;GO:0003674//molecular_function;GO:0003824//catalytic activity;GO:0005488//binding	GO:0071704//organic substance metabolic process;GO:0043170//macromolecule metabolic process;GO:0044238//primary metabolic process;GO:0008152//metabolic process;GO:0019538//protein metabolic process;GO:0008150//biological_process
Bra003975	106.333	321	14.39	41.2333	1.51874	4.23807e-06	0.000122635	yes	-	-	-	-
Bra003979	70.3333	398.333	7.92667	44.0733	2.47512	3.63883e-19	6.08618e-17	yes	AT1G69870 (E=1e-132) | proton-dependent oligopeptide transport (POT) family protein	GO:0016020//membrane;GO:0005575//cellular_component	GO:0003674//molecular_function;GO:0005215//transporter activity	GO:0051234//establishment of localization;GO:0006810//transport;GO:0051179//localization;GO:0008150//biological_process
Bra003985	0	12.6667	0.001	3.42333	11.7412	3.958e-07	1.43521e-05	yes	AT5G02960 (E=3e-066) | 40S ribosomal protein S23 (RPS23B)	GO:0043229//intracellular organelle;GO:0044424//intracellular part;GO:1990904//ribonucleoprotein complex;GO:0044444//cytoplasmic part;GO:0030529//intracellular ribonucleoprotein complex;GO:0043232//intracellular non-membrane-bounded organelle;GO:0043226//organelle;GO:0044464//cell part;GO:0043228//non-membrane-bounded organelle;GO:0005737//cytoplasm;GO:0032991//macromolecular complex;GO:0005840//…	GO:0005198//structural molecule activity;GO:0003674//molecular_function	GO:0006807//nitrogen compound metabolic process;GO:0008150//biological_process;GO:0043603//cellular amide metabolic process;GO:0044267//cellular protein metabolic process;GO:0043604//amide biosynthetic process;GO:0044237//cellular metabolic process;GO:0071704//organic substance metabolic process;GO:0044260//cellular macromolecule metabolic process;GO:0008152//metabolic process;GO:0043170//macromo…
Bra003988	387.333	67	31.4767	5.1	-2.62571	1.39992e-17	1.97884e-15	yes	-	-	-	-
Bra003998	0	10.6667	0.001	1.66667	10.7027	5.04454e-07	1.79409e-05	yes	AT1G69490 (E=2e-116) NAP, ANAC029, ATNAP | NAP (NAC-like, activated by AP3/PI); transcription factor	GO:0043226//organelle;GO:0005622//intracellular;GO:0044464//cell part;GO:0044424//intracellular part;GO:0005634//nucleus;GO:0043229//intracellular organelle;GO:0005575//cellular_component;GO:0005623//cell;GO:0043227//membrane-bounded organelle;GO:0043231//intracellular membrane-bounded organelle	GO:0003676//nucleic acid binding;GO:0003674//molecular_function;GO:0005488//binding;GO:0097159//organic cyclic compound binding;GO:0003677//DNA binding;GO:1901363//heterocyclic compound binding	GO:0044237//cellular metabolic process;GO:0044238//primary metabolic process;GO:0008152//metabolic process;GO:1901360//organic cyclic compound metabolic process;GO:0006807//nitrogen compound metabolic process;GO:0009058//biosynthetic process;GO:0071704//organic substance metabolic process;GO:0006139//nucleobase-containing compound metabolic process;GO:0008150//biological_process;GO:0034641//cellu…
Bra004016	29	62.6667	1.08	2.34333	1.11753	0.00413971	0.0444528	yes	AT1G68750 (E=0.0) ATPPC4 | ATPPC4; phosphoenolpyruvate carboxylase	-	GO:0003824//catalytic activity;GO:0003674//molecular_function	GO:0009987//cellular process;GO:0008150//biological_process;GO:0008152//metabolic process;GO:0044237//cellular metabolic process;GO:0006091//generation of precursor metabolites and energy
Bra004024	2	30.3333	0.486667	7.50333	3.94653	5.80561e-07	2.03809e-05	yes	AT1G68660 (E=7e-080) | FUNCTIONS IN: molecular_function unknown; INVOLVED IN: protein catabolic process; EXPRESSED IN: 23 plant structures; EXPRESSED DURING: 14 growth stages; CONTAINS InterPro DOMAIN/s: Adaptor protein ClpS, core (InterPro:IPR003769), Ribosomal protein L7/L12, C-terminal/adaptor protein ClpS-like (InterPro:IPR014719); Has 513 Blast hits to 513 proteins in 129 species: Archae - 0…	-	-	GO:0019538//protein metabolic process;GO:0008150//biological_process;GO:0071704//organic substance metabolic process;GO:0044238//primary metabolic process;GO:0008152//metabolic process;GO:0009056//catabolic process;GO:0043170//macromolecule metabolic process
Bra004026	5.33333	49.6667	0.646667	5.5	3.08834	3.07727e-06	9.17893e-05	yes	AT1G68620 (E=4e-151) | hydrolase	-	GO:0003824//catalytic activity;GO:0016787//hydrolase activity;GO:0003674//molecular_function	GO:0008150//biological_process;GO:0008152//metabolic process
Bra004029	159.667	426.667	10.15	26.5867	1.38922	3.28228e-07	1.2108e-05	yes	AT1G68580 (E=3e-134) | agenet domain-containing protein / bromo-adjacent homology (BAH) domain-containing protein	-	GO:0003682//chromatin binding;GO:0005488//binding;GO:0003677//DNA binding;GO:0003674//molecular_function;GO:0044877//macromolecular complex binding;GO:1901363//heterocyclic compound binding;GO:0097159//organic cyclic compound binding;GO:0003676//nucleic acid binding	-
Bra004030	19	0	1.25	0.001	-10.2877	1.17622e-10	7.87747e-09	yes	AT1G68570 (E=1e-299) | proton-dependent oligopeptide transport (POT) family protein	GO:0005575//cellular_component;GO:0016020//membrane	GO:0005215//transporter activity;GO:0003674//molecular_function	GO:0051179//localization;GO:0008150//biological_process;GO:0006810//transport;GO:0051234//establishment of localization
Bra004033	148	307.667	18.3167	37.06	1.01671	0.000123581	0.00239268	yes	AT1G68550 (E=4e-070) | AP2 domain-containing transcription factor, putative	GO:0043231//intracellular membrane-bounded organelle;GO:0044424//intracellular part;GO:0005622//intracellular;GO:0043227//membrane-bounded organelle;GO:0005575//cellular_component;GO:0043226//organelle;GO:0044464//cell part;GO:0043229//intracellular organelle;GO:0005634//nucleus;GO:0005623//cell	GO:1901363//heterocyclic compound binding;GO:0097159//organic cyclic compound binding;GO:0003700//transcription factor activity, sequence-specific DNA binding;GO:0003674//molecular_function;GO:0003676//nucleic acid binding;GO:0001071//nucleic acid binding transcription factor activity;GO:0003677//DNA binding;GO:0005488//binding	GO:0009058//biosynthetic process;GO:0008150//biological_process;GO:0034641//cellular nitrogen compound metabolic process;GO:0006139//nucleobase-containing compound metabolic process;GO:0044238//primary metabolic process;GO:0009987//cellular process;GO:0071704//organic substance metabolic process;GO:0006725//cellular aromatic compound metabolic process;GO:1901360//organic cyclic compound metabolic…
Bra004034	1515.67	748.333	120.87	57.1367	-1.08097	7.43391e-07	2.56462e-05	yes	AT1G68530 (E=6e-279) CUT1, POP1, CER6, G2, KCS6 | KCS6 (3-KETOACYL-COA SYNTHASE 6); catalytic/ transferase, transferring acyl groups other than amino-acyl groups	GO:0043227//membrane-bounded organelle;GO:0043226//organelle;GO:0005737//cytoplasm;GO:0016020//membrane;GO:0044464//cell part;GO:0012505//endomembrane system;GO:0005575//cellular_component;GO:0005623//cell;GO:0043231//intracellular membrane-bounded organelle;GO:0044444//cytoplasmic part;GO:0005783//endoplasmic reticulum;GO:0005622//intracellular;GO:0043229//intracellular organelle;GO:0044424//int…	GO:0003824//catalytic activity;GO:0016740//transferase activity;GO:0003674//molecular_function	GO:0016043//cellular component organization;GO:0009058//biosynthetic process;GO:0061458//reproductive system development;GO:0032501//multicellular organismal process;GO:0050896//response to stimulus;GO:0006725//cellular aromatic compound metabolic process;GO:0030154//cell differentiation;GO:0009607//response to biotic stimulus;GO:0009056//catabolic process;GO:0009791//post-embryonic development;G…
Bra004036	178.667	91.3333	39.4067	19.3833	-1.02362	0.000314342	0.00527028	yes	-	-	-	-
Bra004052	8.66667	0.333333	0.94	0.0366667	-4.68012	2.83605e-05	0.000670932	yes	-	-	-	-
Bra004053	1225	379.333	76.7167	23.6467	-1.6979	6.18372e-12	4.85369e-10	yes	AT1G68060 (E=4e-242) ATMAP70-1 | ATMAP70-1 (microtubule-associated proteins 70-1); microtubule binding	-	GO:0005488//binding;GO:0003674//molecular_function;GO:0005515//protein binding	GO:0008150//biological_process;GO:0009987//cellular process;GO:0071840//cellular component organization or biogenesis;GO:0016043//cellular component organization
Bra004055	2	15.2433	0.206667	1.54667	2.90378	8.13435e-05	0.00167436	yes	AT1G68010 (E=5e-209) HPR | HPR; glycerate dehydrogenase/ poly(U) binding	-	GO:0000166//nucleotide binding;GO:1901265//nucleoside phosphate binding;GO:0097159//organic cyclic compound binding;GO:0003824//catalytic activity;GO:1901363//heterocyclic compound binding;GO:0036094//small molecule binding;GO:0005488//binding;GO:0003674//molecular_function	GO:0008152//metabolic process;GO:0008150//biological_process
Bra004058	6.37667	55.17	0.24	2.06667	3.1062	1.2213e-09	7.01722e-08	yes	AT3G45140 (E=0.0) LOX2, ATLOX2 | LOX2 (LIPOXYGENASE 2); lipoxygenase	-	GO:0003674//molecular_function;GO:0005488//binding;GO:0003824//catalytic activity;GO:0005515//protein binding	GO:0009987//cellular process;GO:0044699//single-organism process;GO:0008150//biological_process;GO:0008152//metabolic process;GO:0006629//lipid metabolic process;GO:0009058//biosynthetic process;GO:0071704//organic substance metabolic process;GO:0044710//single-organism metabolic process;GO:0044238//primary metabolic process
Bra004059	0	9.33333	0.001	0.406667	8.6677	1.90313e-06	5.97223e-05	yes	AT3G45140 (E=0.0) LOX2, ATLOX2 | LOX2 (LIPOXYGENASE 2); lipoxygenase	-	GO:0003674//molecular_function;GO:0005488//binding;GO:0003824//catalytic activity;GO:0005515//protein binding	GO:0008152//metabolic process;GO:0009987//cellular process;GO:0044699//single-organism process;GO:0071704//organic substance metabolic process;GO:0009058//biosynthetic process;GO:0044238//primary metabolic process;GO:0044710//single-organism metabolic process;GO:0008150//biological_process;GO:0006629//lipid metabolic process
Bra004064	3.33333	19	0.21	1.17333	2.48215	3.29636e-05	0.000766975	yes	-	-	-	-
Bra004075	312.333	34.6667	60.6	6.09667	-3.31323	1.93698e-19	3.30903e-17	yes	AT1G67740 (E=5e-053) PSBY, YCF32 | PSBY	GO:0005622//intracellular;GO:0005623//cell;GO:0044464//cell part;GO:0009579//thylakoid;GO:0005575//cellular_component;GO:0016020//membrane;GO:0044424//intracellular part	GO:0003674//molecular_function;GO:0005488//binding	GO:0008150//biological_process;GO:0008152//metabolic process;GO:0015979//photosynthesis;GO:0009987//cellular process;GO:0044237//cellular metabolic process
Bra004078	88	39	4.82333	2.13667	-1.17467	0.00128401	0.0171341	yes	AT1G67690 (E=0.0) | metalloendopeptidase	-	GO:0003824//catalytic activity;GO:0016787//hydrolase activity;GO:0005488//binding;GO:0003674//molecular_function	GO:0071704//organic substance metabolic process;GO:0008150//biological_process;GO:0044238//primary metabolic process;GO:0008152//metabolic process;GO:0043170//macromolecule metabolic process;GO:0019538//protein metabolic process
Bra004079	107.667	36.6667	6.53	2.16333	-1.59383	2.77157e-06	8.35925e-05	yes	AT1G67680 (E=2e-274) | 7S RNA binding	GO:0005575//cellular_component;GO:0005622//intracellular;GO:0044424//intracellular part;GO:0005623//cell;GO:0044464//cell part;GO:0005737//cytoplasm	GO:0005488//binding;GO:0097159//organic cyclic compound binding;GO:0003676//nucleic acid binding;GO:0003674//molecular_function;GO:1901363//heterocyclic compound binding;GO:0005515//protein binding;GO:0003723//RNA binding	GO:0051234//establishment of localization;GO:0051179//localization;GO:0071840//cellular component organization or biogenesis;GO:0008150//biological_process;GO:0006810//transport;GO:0016043//cellular component organization;GO:0009987//cellular process
Bra004099	10.6667	2.66667	0.483333	0.113333	-2.09245	0.00394718	0.04289	yes	AT1G67220 (E=8e-259) HAC02, HAC2, ATHPCAT1 | HAC2 (HISTONE ACETYLTRANSFERASE OF THE CBP FAMILY 2); DNA binding / histone acetyltransferase/ transcription cofactor	GO:0043226//organelle;GO:0043229//intracellular organelle;GO:0005623//cell;GO:0005634//nucleus;GO:0044424//intracellular part;GO:0043231//intracellular membrane-bounded organelle;GO:0043227//membrane-bounded organelle;GO:0005575//cellular_component;GO:0044464//cell part;GO:0005622//intracellular	GO:0003674//molecular_function;GO:0003824//catalytic activity;GO:0016740//transferase activity;GO:0005515//protein binding;GO:0005488//binding	GO:0008152//metabolic process;GO:1901360//organic cyclic compound metabolic process;GO:0006139//nucleobase-containing compound metabolic process;GO:0008150//biological_process;GO:0043412//macromolecule modification;GO:0009058//biosynthetic process;GO:0071840//cellular component organization or biogenesis;GO:0044260//cellular macromolecule metabolic process;GO:0019538//protein metabolic process;GO…
Bra004106	0.333333	12.6667	0.19	6.93333	5.18948	1.5316e-06	4.90266e-05	yes	AT1G64750 (E=5e-007) ATDSS1(I) | ATDSS1(I) (ARABIDOPSIS THALIANA DELETION OF SUV3 SUPRESSOR 1(I))	GO:0044464//cell part;GO:0005575//cellular_component;GO:0005622//intracellular;GO:0005623//cell	-	GO:0009987//cellular process;GO:0006810//transport;GO:0051179//localization;GO:0008150//biological_process;GO:0008152//metabolic process;GO:0051234//establishment of localization;GO:0071840//cellular component organization or biogenesis;GO:0016043//cellular component organization
Bra004108	245.667	93.3333	29.85	11.7167	-1.34917	0.00017015	0.00314379	yes	-	-	-	-
Bra004109	29.6667	8	2.07	0.506667	-2.03052	0.000227702	0.00401002	yes	AT1G65060 (E=1e-253) 4CL3 | 4CL3; 4-coumarate-CoA ligase	-	GO:0003824//catalytic activity;GO:0003674//molecular_function	GO:0048856//anatomical structure development;GO:0008150//biological_process;GO:0044699//single-organism process;GO:0009628//response to abiotic stimulus;GO:0007275//multicellular organism development;GO:0044767//single-organism developmental process;GO:0032502//developmental process;GO:0032501//multicellular organismal process;GO:0071840//cellular component organization or biogenesis;GO:0050896//…
Bra004111	2	17.6667	0.32	2.67	3.0607	0.000209414	0.00374157	yes	AT1G43080 (E=9e-123) | glycoside hydrolase family 28 protein / polygalacturonase (pectinase) family protein	GO:0005576//extracellular region;GO:0005575//cellular_component	GO:0003824//catalytic activity;GO:0016787//hydrolase activity;GO:0003674//molecular_function	GO:0008150//biological_process;GO:0071840//cellular component organization or biogenesis;GO:0044238//primary metabolic process;GO:0009987//cellular process;GO:0005975//carbohydrate metabolic process;GO:0016043//cellular component organization;GO:0071704//organic substance metabolic process;GO:0008152//metabolic process
Bra004113	98	231.333	8.80667	20	1.18333	3.01088e-05	0.000708812	yes	AT1G65320 (E=7e-199) | CBS domain-containing protein	GO:0044464//cell part;GO:0043226//organelle;GO:0043229//intracellular organelle;GO:0043231//intracellular membrane-bounded organelle;GO:0005623//cell;GO:0005575//cellular_component;GO:0044424//intracellular part;GO:0005773//vacuole;GO:0005737//cytoplasm;GO:0043227//membrane-bounded organelle;GO:0044444//cytoplasmic part;GO:0005622//intracellular	GO:1901363//heterocyclic compound binding;GO:0097159//organic cyclic compound binding;GO:0005488//binding;GO:0000166//nucleotide binding;GO:0036094//small molecule binding;GO:0003674//molecular_function;GO:1901265//nucleoside phosphate binding	-
Bra004116	278	125.333	13.4	6.20333	-1.11112	0.0012177	0.0164207	yes	AT1G65470 (E=1e-257) FAS1, NFB2 | FAS1 (FASCIATA 1); histone binding	GO:0005575//cellular_component	-	GO:0008150//biological_process;GO:0071840//cellular component organization or biogenesis;GO:0034641//cellular nitrogen compound metabolic process;GO:0007049//cell cycle;GO:0044763//single-organism cellular process;GO:0044237//cellular metabolic process;GO:0046483//heterocycle metabolic process;GO:0030154//cell differentiation;GO:0048869//cellular developmental process;GO:0044260//cellular macromo…
Bra004117	153	31.6667	34.0267	7	-2.28124	3.27903e-10	2.08669e-08	yes	AT4G20370 (E=2e-085) TSF | TSF (TWIN SISTER OF FT); phosphatidylethanolamine binding	-	GO:0008289//lipid binding;GO:0005488//binding;GO:0003674//molecular_function	GO:0090567//reproductive shoot system development;GO:0003006//developmental process involved in reproduction;GO:0022414//reproductive process;GO:0048856//anatomical structure development;GO:0044767//single-organism developmental process;GO:0009791//post-embryonic development;GO:0009628//response to abiotic stimulus;GO:0044699//single-organism process;GO:0048731//system development;GO:0000003//rep…
Bra004126	2187.67	5714.67	464.637	1147.15	1.30388	2.30569e-08	1.08003e-06	yes	-	-	-	-
Bra004127	312.333	153.667	17.4767	8.39667	-1.05754	0.000155477	0.00291996	yes	AT1G65730 (E=0.0) YSL7 | YSL7 (YELLOW STRIPE LIKE 7); oligopeptide transporter	GO:0071944//cell periphery;GO:0005886//plasma membrane;GO:0005575//cellular_component;GO:0016020//membrane;GO:0005623//cell;GO:0044464//cell part	-	GO:0009987//cellular process;GO:0051179//localization;GO:0006810//transport;GO:0051234//establishment of localization;GO:0008150//biological_process
Bra004143	137	32	23.5367	5.77333	-2.02743	0.000554729	0.00854454	yes	AT1G66070 (E=2e-069) | translation initiation factor-related	GO:0005737//cytoplasm;GO:0044424//intracellular part;GO:0005622//intracellular;GO:0044464//cell part;GO:0005575//cellular_component;GO:0005623//cell	GO:0003723//RNA binding;GO:0003676//nucleic acid binding;GO:1901363//heterocyclic compound binding;GO:0003674//molecular_function;GO:0008135//translation factor activity, RNA binding;GO:0097159//organic cyclic compound binding;GO:0005488//binding	GO:0043170//macromolecule metabolic process;GO:0008152//metabolic process;GO:0071840//cellular component organization or biogenesis;GO:0044249//cellular biosynthetic process;GO:0008150//biological_process;GO:0044238//primary metabolic process;GO:0043604//amide biosynthetic process;GO:1901576//organic substance biosynthetic process;GO:0019538//protein metabolic process;GO:0043043//peptide biosynth…
Bra004161	61.6667	7	13.34	1.63	-3.03281	0.000111156	0.00218792	yes	AT1G66360 (E=3e-083) | C2 domain-containing protein	-	GO:0005488//binding;GO:0005515//protein binding;GO:0003674//molecular_function	GO:0040007//growth;GO:0048856//anatomical structure development;GO:0009653//anatomical structure morphogenesis;GO:0000003//reproduction;GO:0009856//pollination;GO:0044767//single-organism developmental process;GO:0009987//cellular process;GO:0032502//developmental process;GO:0032501//multicellular organismal process;GO:0048869//cellular developmental process;GO:0044706//multi-multicellular organi…
Bra004170	18.3333	57.3333	3.21	9.4	1.55009	0.000198471	0.0035801	yes	AT1G66480 (E=8e-090) PMI2 | PMI2 (plastid movement impaired 2)	GO:0005623//cell;GO:0071944//cell periphery;GO:0016020//membrane;GO:0044464//cell part;GO:0005886//plasma membrane;GO:0005575//cellular_component	-	GO:0009987//cellular process;GO:0009058//biosynthetic process;GO:0008150//biological_process;GO:0008152//metabolic process
Bra004171	214.333	25	37.18	4.35333	-3.09433	8.34185e-20	1.46422e-17	yes	AT1G66500 (E=3e-051) | zinc finger (C2H2-type) family protein	-	GO:0005488//binding;GO:0003674//molecular_function	-
Bra004172	185.333	16.6667	19.08	1.77333	-3.42753	1.76908e-12	1.4951e-10	yes	AT1G66510 (E=8e-124) | AAR2 protein family	-	-	GO:0009987//cellular process;GO:0050896//response to stimulus;GO:0044238//primary metabolic process;GO:0044763//single-organism cellular process;GO:0044699//single-organism process;GO:0006950//response to stress;GO:0044237//cellular metabolic process;GO:0009628//response to abiotic stimulus;GO:0008150//biological_process;GO:0034641//cellular nitrogen compound metabolic process;GO:0006139//nucleob…
Bra004179	5	0	0.34	0.001	-8.40939	0.0020558	0.0251627	yes	AT4G21380 (E=5e-176) ARK3 | ARK3 (A. THALIANA RECEPTOR KINASE 3); kinase/ transmembrane receptor protein serine/threonine kinase	-	GO:0016740//transferase activity;GO:0003674//molecular_function;GO:0003824//catalytic activity;GO:0016301//kinase activity;GO:0016772//transferase activity, transferring phosphorus-containing groups	GO:0022414//reproductive process;GO:0044706//multi-multicellular organism process;GO:0044699//single-organism process;GO:0000003//reproduction;GO:0009856//pollination;GO:0044763//single-organism cellular process;GO:0009875//pollen-pistil interaction;GO:0044703//multi-organism reproductive process;GO:0009987//cellular process;GO:0032501//multicellular organismal process;GO:0051704//multi-organism …
Bra004183	3	31.6667	0.343333	3.40667	3.31068	1.23459e-07	4.9548e-06	yes	AT1G66700 (E=5e-160) PXMT1 | PXMT1; S-adenosylmethionine-dependent methyltransferase	-	GO:0003824//catalytic activity;GO:0003674//molecular_function;GO:0016740//transferase activity	GO:0008150//biological_process;GO:0008152//metabolic process
Bra004185	103.667	0	3.74	0.001	-11.8688	6.85601e-33	2.95976e-30	yes	AT1G66730 (E=9e-181) | ATP dependent DNA ligase family protein	-	GO:1901265//nucleoside phosphate binding;GO:0097159//organic cyclic compound binding;GO:0016787//hydrolase activity;GO:0005488//binding;GO:0036094//small molecule binding;GO:0000166//nucleotide binding;GO:0003674//molecular_function;GO:0003824//catalytic activity;GO:1901363//heterocyclic compound binding	GO:0009987//cellular process;GO:0044260//cellular macromolecule metabolic process;GO:0008152//metabolic process;GO:0046483//heterocycle metabolic process;GO:0044238//primary metabolic process;GO:0044237//cellular metabolic process;GO:0006950//response to stress;GO:0008150//biological_process;GO:0034641//cellular nitrogen compound metabolic process;GO:0006139//nucleobase-containing compound metabo…
Bra004190	0	4.33333	0.001	1.20333	10.2328	0.00264154	0.0308883	yes	-	-	-	-
Bra004235	49	128.667	3.92	9.96	1.34529	1.69693e-05	0.000425846	yes	-	-	-	-
Bra004237	3.66667	49	0.44	5.80333	3.72131	5.05595e-12	4.03794e-10	yes	-	-	-	-
Bra004241	48.6667	8	4.89667	0.82	-2.5781	6.69168e-08	2.87329e-06	yes	AT1G67660 (E=5e-102) | DNA binding / nuclease	-	GO:0097159//organic cyclic compound binding;GO:0016787//hydrolase activity;GO:0003677//DNA binding;GO:0004518//nuclease activity;GO:0005488//binding;GO:0003676//nucleic acid binding;GO:0003824//catalytic activity;GO:1901363//heterocyclic compound binding;GO:0016788//hydrolase activity, acting on ester bonds;GO:0003674//molecular_function	GO:1901360//organic cyclic compound metabolic process;GO:0008152//metabolic process;GO:0071704//organic substance metabolic process;GO:0044237//cellular metabolic process;GO:0046483//heterocycle metabolic process;GO:0006807//nitrogen compound metabolic process;GO:0008150//biological_process;GO:0006725//cellular aromatic compound metabolic process;GO:0006139//nucleobase-containing compound metabol…
Bra004260	175.333	396	15.4767	33.87	1.12991	2.695e-06	8.17612e-05	yes	AT1G67800 (E=5e-182) | copine-related	-	GO:0005488//binding;GO:0005515//protein binding;GO:0003674//molecular_function	GO:0043412//macromolecule modification;GO:0050789//regulation of biological process;GO:0065007//biological regulation;GO:0044699//single-organism process;GO:0036211//protein modification process;GO:0006464//cellular protein modification process;GO:0044700//single organism signaling;GO:0008150//biological_process;GO:0044267//cellular protein metabolic process;GO:0050896//response to stimulus;GO:00…
Bra004262	243.667	11.6667	24.4033	1.18667	-4.36209	8.66522e-23	2.00594e-20	yes	-	-	-	-
Bra004267	23.6667	84.6667	4.69667	15.83	1.75295	0.000167085	0.00309432	yes	-	-	-	-
Bra004270	660	232.333	30.8567	10.4567	-1.56116	1.10165e-11	8.35944e-10	yes	AT1G67950 (E=4e-115) | RNA recognition motif (RRM)-containing protein	-	GO:0003676//nucleic acid binding;GO:0000166//nucleotide binding;GO:1901265//nucleoside phosphate binding;GO:0036094//small molecule binding;GO:1901363//heterocyclic compound binding;GO:0005488//binding;GO:0003674//molecular_function;GO:0097159//organic cyclic compound binding	GO:0009856//pollination;GO:0032501//multicellular organismal process;GO:0044706//multi-multicellular organism process;GO:0000003//reproduction;GO:0044707//single-multicellular organism process;GO:0044699//single-organism process;GO:0022414//reproductive process;GO:0008150//biological_process;GO:0044767//single-organism developmental process;GO:0032502//developmental process;GO:0051704//multi-orga…
Bra004271	29.3333	4.33333	4.33667	0.643333	-2.75295	2.14883e-06	6.65178e-05	yes	AT1G67940 (E=2e-127) ATNAP3 | ATNAP3; transporter	GO:0005623//cell;GO:0016020//membrane;GO:0005575//cellular_component;GO:0043226//organelle;GO:0043231//intracellular membrane-bounded organelle;GO:0044444//cytoplasmic part;GO:0005622//intracellular;GO:0005773//vacuole;GO:0044424//intracellular part;GO:0005886//plasma membrane;GO:0043229//intracellular organelle;GO:0005737//cytoplasm;GO:0044464//cell part;GO:0071944//cell periphery;GO:0043227//me…	GO:1901363//heterocyclic compound binding;GO:0005488//binding;GO:0003674//molecular_function;GO:0036094//small molecule binding;GO:0016787//hydrolase activity;GO:0005215//transporter activity;GO:0097159//organic cyclic compound binding;GO:1901265//nucleoside phosphate binding;GO:0000166//nucleotide binding;GO:0003824//catalytic activity	GO:0006810//transport;GO:0051179//localization;GO:0051234//establishment of localization;GO:0008150//biological_process
Bra004272	367	140	37.2267	13.9133	-1.41987	2.53544e-06	7.76579e-05	yes	AT1G67970 (E=1e-136) AT-HSFA8, HSFA8 | AT-HSFA8; DNA binding / transcription factor	GO:0043231//intracellular membrane-bounded organelle;GO:0043229//intracellular organelle;GO:0044464//cell part;GO:0005634//nucleus;GO:0043226//organelle;GO:0005622//intracellular;GO:0043227//membrane-bounded organelle;GO:0005623//cell;GO:0044424//intracellular part;GO:0005575//cellular_component	GO:0005488//binding;GO:0001071//nucleic acid binding transcription factor activity;GO:0003700//transcription factor activity, sequence-specific DNA binding;GO:0003674//molecular_function;GO:0097159//organic cyclic compound binding;GO:1901363//heterocyclic compound binding;GO:0003676//nucleic acid binding;GO:0003677//DNA binding	GO:0050896//response to stimulus;GO:0071704//organic substance metabolic process;GO:0008152//metabolic process;GO:0006725//cellular aromatic compound metabolic process;GO:0006139//nucleobase-containing compound metabolic process;GO:1901360//organic cyclic compound metabolic process;GO:0044238//primary metabolic process;GO:0046483//heterocycle metabolic process;GO:0009058//biosynthetic process;GO:…
Bra004274	48.8267	12.6667	8.29	2.22	-1.90081	4.61989e-05	0.00102562	yes	AT1G68000 (E=3e-108) ATPIS1, ATPIS | ATPIS1 (PHOSPHATIDYLINOSITOL SYNTHASE 1); CDP-diacylglycerol-inositol 3-phosphatidyltransferase	GO:0005575//cellular_component;GO:0016020//membrane	GO:0003674//molecular_function;GO:0016740//transferase activity;GO:0003824//catalytic activity	GO:0006629//lipid metabolic process;GO:0044238//primary metabolic process;GO:0008150//biological_process;GO:0071704//organic substance metabolic process;GO:0044699//single-organism process;GO:0008152//metabolic process;GO:0044710//single-organism metabolic process;GO:0009058//biosynthetic process;GO:0009987//cellular process
Bra004275	71.6667	162.423	7.25333	15.2767	1.07461	0.0016753	0.0212462	yes	AT1G68010 (E=9e-208) HPR | HPR; glycerate dehydrogenase/ poly(U) binding	-	GO:0005488//binding;GO:0097159//organic cyclic compound binding;GO:0003824//catalytic activity;GO:0000166//nucleotide binding;GO:0003674//molecular_function;GO:0036094//small molecule binding;GO:1901265//nucleoside phosphate binding;GO:1901363//heterocyclic compound binding	GO:0008152//metabolic process;GO:0008150//biological_process
Bra004284	233.333	58.6667	27.8767	6.68667	-2.0597	4.64423e-12	3.73714e-10	yes	-	-	-	-
Bra004296	40.6667	14.6667	9.64333	3.3	-1.54707	0.000306901	0.00516286	yes	-	-	-	-
Bra004299	23.3333	0	4.9	0.001	-12.2586	1.61046e-12	1.36829e-10	yes	-	-	-	-
Bra004310	1406.33	293.667	117.52	24.0033	-2.2916	1.96711e-22	4.52095e-20	yes	-	-	-	-
Bra004316	22.37	6.66667	2.76667	0.783333	-1.82045	0.00293484	0.0337132	yes	AT1G68540 (E=1e-171) | oxidoreductase family protein	-	GO:0005488//binding;GO:0003674//molecular_function;GO:0003824//catalytic activity	GO:0009987//cellular process;GO:0008152//metabolic process;GO:0008150//biological_process
Bra004332	25.6667	87.6667	0.833333	2.84333	1.77062	2.74178e-05	0.000652675	yes	AT1G68710 (E=0.0) | haloacid dehalogenase-like hydrolase family protein	GO:0005575//cellular_component;GO:0016020//membrane	GO:0016787//hydrolase activity;GO:0097159//organic cyclic compound binding;GO:0005215//transporter activity;GO:1901363//heterocyclic compound binding;GO:0005488//binding;GO:1901265//nucleoside phosphate binding;GO:0036094//small molecule binding;GO:0003674//molecular_function;GO:0003824//catalytic activity;GO:0000166//nucleotide binding	GO:0006810//transport;GO:0051179//localization;GO:0051234//establishment of localization;GO:0008150//biological_process;GO:0071840//cellular component organization or biogenesis;GO:0009987//cellular process;GO:0016043//cellular component organization
Bra004333	227.333	23.3333	24.0633	2.38667	-3.33377	1.09122e-21	2.38767e-19	yes	AT1G68730 (E=6e-053) | zinc finger (DNL type) family protein	-	GO:0005488//binding;GO:0003674//molecular_function	-
Bra004343	0.333333	6.66667	0.04	0.683333	4.09452	0.0030163	0.0344138	yes	AT1G68850 (E=9e-183) | peroxidase, putative	GO:0005576//extracellular region;GO:0005575//cellular_component	GO:0005488//binding;GO:0003674//molecular_function;GO:0003824//catalytic activity	GO:0008150//biological_process;GO:0050896//response to stimulus;GO:0008152//metabolic process;GO:0006950//response to stress
Bra004356	22	50	1.13333	2.52	1.15285	0.00289228	0.0333563	yes	AT1G69020 (E=1e-144) | prolyl oligopeptidase family protein	GO:0009536//plastid;GO:0044424//intracellular part;GO:0043227//membrane-bounded organelle;GO:0043231//intracellular membrane-bounded organelle;GO:0005623//cell;GO:0005622//intracellular;GO:0044464//cell part;GO:0005737//cytoplasm;GO:0043226//organelle;GO:0005575//cellular_component;GO:0044444//cytoplasmic part;GO:0043229//intracellular organelle	GO:0003674//molecular_function;GO:0005488//binding;GO:0005515//protein binding;GO:0003824//catalytic activity;GO:0016787//hydrolase activity	GO:0019538//protein metabolic process;GO:0044238//primary metabolic process;GO:0071704//organic substance metabolic process;GO:0043170//macromolecule metabolic process;GO:0008150//biological_process;GO:0008152//metabolic process
Bra004363	16.6667	3.33333	2.17667	0.403333	-2.43208	9.73208e-05	0.00195781	yes	AT1G69170 (E=7e-043) | squamosa promoter-binding protein-like 6 (SPL6)	GO:0005622//intracellular;GO:0005634//nucleus;GO:0044424//intracellular part;GO:0005575//cellular_component;GO:0005623//cell;GO:0043226//organelle;GO:0043231//intracellular membrane-bounded organelle;GO:0044464//cell part;GO:0043227//membrane-bounded organelle;GO:0043229//intracellular organelle	GO:0003677//DNA binding;GO:0003674//molecular_function;GO:0097159//organic cyclic compound binding;GO:0003676//nucleic acid binding;GO:0005488//binding;GO:1901363//heterocyclic compound binding	-
Bra004376	41.6667	0	4.87667	0.001	-12.2517	3.69185e-17	4.99746e-15	yes	AT1G69370 (E=5e-106) CM3, cm-3 | CM3 (chorismate mutase 3); chorismate mutase	-	GO:0003674//molecular_function;GO:0003824//catalytic activity	GO:0008150//biological_process;GO:0009058//biosynthetic process;GO:0009987//cellular process;GO:0008152//metabolic process
Bra004385	29	145.333	4.28667	20.0733	2.22735	2.00061e-05	0.000492763	yes	AT1G69490 (E=1e-130) NAP, ANAC029, ATNAP | NAP (NAC-like, activated by AP3/PI); transcription factor	GO:0043226//organelle;GO:0043229//intracellular organelle;GO:0043231//intracellular membrane-bounded organelle;GO:0043227//membrane-bounded organelle;GO:0005634//nucleus;GO:0044424//intracellular part;GO:0044464//cell part;GO:0005622//intracellular;GO:0005623//cell;GO:0005575//cellular_component	GO:0097159//organic cyclic compound binding;GO:0005488//binding;GO:1901363//heterocyclic compound binding;GO:0003674//molecular_function;GO:0003677//DNA binding;GO:0003676//nucleic acid binding	GO:0034641//cellular nitrogen compound metabolic process;GO:0044238//primary metabolic process;GO:0008152//metabolic process;GO:0046483//heterocycle metabolic process;GO:0009058//biosynthetic process;GO:0009987//cellular process;GO:0006725//cellular aromatic compound metabolic process;GO:1901360//organic cyclic compound metabolic process;GO:0008150//biological_process;GO:0006807//nitrogen compoun…
Bra004389	8.33333	29.3333	1.05	3.70667	1.81973	0.000450913	0.00716538	yes	AT1G69523 (E=2e-103) | UbiE/COQ5 methyltransferase family protein	-	GO:0003824//catalytic activity;GO:0003674//molecular_function;GO:0016740//transferase activity	GO:0008152//metabolic process;GO:0008150//biological_process
Bra004488	1.33333	22.3333	0.13	2.1	4.01381	1.50868e-08	7.31357e-07	yes	AT3G60960 (E=1e-065) | pentatricopeptide (PPR) repeat-containing protein	-	GO:0005515//protein binding;GO:0005488//binding;GO:0003674//molecular_function	-
Bra004499	20.3333	67.6667	2.46667	7.88333	1.67624	9.58685e-06	0.000258013	yes	AT2G46890 (E=2e-170) | oxidoreductase, acting on the CH-CH group of donors	GO:0044424//intracellular part;GO:0005623//cell;GO:0016020//membrane;GO:0005575//cellular_component;GO:0005622//intracellular;GO:0005737//cytoplasm;GO:0044464//cell part	GO:0003824//catalytic activity;GO:0003674//molecular_function	GO:0044238//primary metabolic process;GO:0006629//lipid metabolic process;GO:0008152//metabolic process;GO:0044710//single-organism metabolic process;GO:0008150//biological_process;GO:0071704//organic substance metabolic process;GO:0044699//single-organism process
Bra004502	3.66667	0	0.67	0.001	-9.38802	0.0044906	0.0472363	yes	AT2G46860 (E=2e-111) AtPPa3 | AtPPa3 (Arabidopsis thaliana pyrophosphorylase 3); inorganic diphosphatase/ pyrophosphatase	GO:0044424//intracellular part;GO:0005575//cellular_component;GO:0005737//cytoplasm;GO:0005622//intracellular;GO:0005623//cell;GO:0044464//cell part	GO:0003674//molecular_function;GO:0003824//catalytic activity;GO:0005488//binding;GO:0016787//hydrolase activity	GO:0008152//metabolic process;GO:0008150//biological_process;GO:0009987//cellular process
Bra004503	285.333	52.3333	20.82	3.65667	-2.50937	3.09197e-06	9.21418e-05	yes	AT2G46830 (E=2e-117) CCA1 | CCA1 (CIRCADIAN CLOCK ASSOCIATED 1); DNA binding / transcription activator/ transcription factor/ transcription repressor	GO:0044464//cell part;GO:0005623//cell;GO:0005634//nucleus;GO:0043226//organelle;GO:0043227//membrane-bounded organelle;GO:0043229//intracellular organelle;GO:0005575//cellular_component;GO:0005622//intracellular;GO:0043231//intracellular membrane-bounded organelle;GO:0044424//intracellular part	GO:0003674//molecular_function;GO:0003682//chromatin binding;GO:0003677//DNA binding;GO:0005488//binding;GO:0003676//nucleic acid binding;GO:1901363//heterocyclic compound binding;GO:0097159//organic cyclic compound binding;GO:0003700//transcription factor activity, sequence-specific DNA binding;GO:0001071//nucleic acid binding transcription factor activity;GO:0044877//macromolecular complex bind…	GO:0006725//cellular aromatic compound metabolic process;GO:0009987//cellular process;GO:0044707//single-multicellular organism process;GO:0032501//multicellular organismal process;GO:0006807//nitrogen compound metabolic process;GO:1901360//organic cyclic compound metabolic process;GO:0044699//single-organism process;GO:0007275//multicellular organism development;GO:0032502//developmental process…
Bra004507	256.667	23.3333	25.0233	2.21333	-3.49898	4.56839e-11	3.2288e-09	yes	AT2G46790 (E=1e-085) APRR9, PRR9, TL1 | APRR9 (ARABIDOPSIS PSEUDO-RESPONSE REGULATOR 9); protein binding / transcription regulator/ two-component response regulator	-	GO:0004871//signal transducer activity;GO:0003677//DNA binding;GO:0097159//organic cyclic compound binding;GO:0005488//binding;GO:0003674//molecular_function;GO:0003676//nucleic acid binding;GO:0005515//protein binding;GO:1901363//heterocyclic compound binding	GO:1901360//organic cyclic compound metabolic process;GO:0006807//nitrogen compound metabolic process;GO:0044763//single-organism cellular process;GO:0007154//cell communication;GO:0051716//cellular response to stimulus;GO:0071704//organic substance metabolic process;GO:0044699//single-organism process;GO:0006139//nucleobase-containing compound metabolic process;GO:0007165//signal transduction;GO…
Bra004518	37.6667	2.33333	10.8567	0.59	-4.20172	8.27377e-10	4.90378e-08	yes	AT2G46650 (E=3e-058) B5 #1, ATCB5-C, CB5-C | CB5-C (CYTOCHROME B5 ISOFORM C); heme binding	-	GO:0005488//binding;GO:0003674//molecular_function	-
Bra004530	12.3333	46	0.83	3.03667	1.87131	0.000342564	0.00568201	yes	AT2G46530 (E=4e-271) ARF11 | ARF11 (AUXIN RESPONSE FACTOR 11); transcription factor	GO:0044424//intracellular part;GO:0005622//intracellular;GO:0043229//intracellular organelle;GO:0043226//organelle;GO:0043231//intracellular membrane-bounded organelle;GO:0044464//cell part;GO:0005634//nucleus;GO:0005623//cell;GO:0005575//cellular_component;GO:0043227//membrane-bounded organelle	GO:0001071//nucleic acid binding transcription factor activity;GO:0003677//DNA binding;GO:0003676//nucleic acid binding;GO:0097159//organic cyclic compound binding;GO:0003700//transcription factor activity, sequence-specific DNA binding;GO:1901363//heterocyclic compound binding;GO:0003674//molecular_function;GO:0005488//binding;GO:0005515//protein binding	GO:0007165//signal transduction;GO:0050896//response to stimulus;GO:0009987//cellular process;GO:0044699//single-organism process;GO:0044238//primary metabolic process;GO:0009058//biosynthetic process;GO:0008152//metabolic process;GO:0008150//biological_process;GO:0044237//cellular metabolic process;GO:0006807//nitrogen compound metabolic process;GO:0023052//signaling;GO:0006725//cellular aromati…
Bra004541	124.333	17.6667	7.18667	0.986667	-2.86469	1.80779e-14	1.87505e-12	yes	-	-	-	-
Bra004552	19	6.66667	1.77667	0.6	-1.56614	0.00418236	0.0448357	yes	AT2G46250 (E=2e-103) | myosin heavy chain-related	-	-	GO:0006725//cellular aromatic compound metabolic process;GO:0008152//metabolic process;GO:0044237//cellular metabolic process;GO:0046483//heterocycle metabolic process;GO:0009987//cellular process;GO:0071704//organic substance metabolic process;GO:0034641//cellular nitrogen compound metabolic process;GO:0006807//nitrogen compound metabolic process;GO:0044238//primary metabolic process;GO:0006139/…
Bra004558	30.3333	2.66667	3.42333	0.29	-3.56128	4.65324e-08	2.06462e-06	yes	-	-	-	-
Bra004560	24.6667	250.667	2.18333	21.0133	3.2667	7.11478e-19	1.14215e-16	yes	AT2G46210 (E=5e-261) | delta-8 sphingolipid desaturase, putative	GO:0043227//membrane-bounded organelle;GO:0044444//cytoplasmic part;GO:0044424//intracellular part;GO:0005623//cell;GO:0043226//organelle;GO:0005622//intracellular;GO:0016020//membrane;GO:0043231//intracellular membrane-bounded organelle;GO:0005575//cellular_component;GO:0005737//cytoplasm;GO:0005783//endoplasmic reticulum;GO:0043229//intracellular organelle;GO:0012505//endomembrane system;GO:004…	GO:0005488//binding;GO:0003824//catalytic activity;GO:0003674//molecular_function	GO:0009987//cellular process;GO:0009058//biosynthetic process;GO:0008150//biological_process;GO:0044699//single-organism process;GO:0008152//metabolic process;GO:0050896//response to stimulus;GO:0044710//single-organism metabolic process;GO:0071704//organic substance metabolic process;GO:0006950//response to stress;GO:0044238//primary metabolic process;GO:0009628//response to abiotic stimulus;GO:…
Bra004564	340.667	119	60.2833	20.0167	-1.59056	1.6233e-09	9.16218e-08	yes	AT2G46150 (E=3e-077) | FUNCTIONS IN: molecular_function unknown; INVOLVED IN: biological_process unknown; LOCATED IN: plasma membrane; EXPRESSED IN: 15 plant structures; EXPRESSED DURING: 7 growth stages; CONTAINS InterPro DOMAIN/s: Harpin-induced 1 (InterPro:IPR010847); BEST Arabidopsis thaliana protein match is: unknown protein (TAIR:AT3G54200.1); Has 137 Blast hits to 136 proteins in 12 specie…	GO:0005575//cellular_component;GO:0005886//plasma membrane;GO:0005623//cell;GO:0016020//membrane;GO:0071944//cell periphery;GO:0044464//cell part	-	-
Bra004565	48	12.3333	10.98	2.65667	-2.04719	0.0001317	0.00252539	yes	AT2G46140 (E=8e-082) | late embryogenesis abundant protein, putative / LEA protein, putative	-	-	GO:0006950//response to stress;GO:0009628//response to abiotic stimulus;GO:0050896//response to stimulus;GO:0008150//biological_process
Bra004571	98	13.3333	6.16667	0.843333	-2.87032	1.09224e-11	8.30778e-10	yes	AT2G40460 (E=1e-187) | proton-dependent oligopeptide transport (POT) family protein	GO:0005575//cellular_component;GO:0016020//membrane	GO:0003674//molecular_function;GO:0005215//transporter activity	GO:0006810//transport;GO:0051179//localization;GO:0008150//biological_process;GO:0051234//establishment of localization
Bra004590	3582.67	1759	148.027	73.1033	-1.01785	2.91182e-05	0.000686503	yes	AT2G40840 (E=0.0) DPE2 | DPE2 (DISPROPORTIONATING ENZYME 2); 4-alpha-glucanotransferase/ heteroglycan binding	GO:0005623//cell;GO:0044444//cytoplasmic part;GO:0044464//cell part;GO:0005575//cellular_component;GO:0005829//cytosol;GO:0044424//intracellular part;GO:0005622//intracellular;GO:0005737//cytoplasm	GO:0005488//binding;GO:0030246//carbohydrate binding;GO:0003674//molecular_function;GO:0016740//transferase activity;GO:0003824//catalytic activity	GO:0009056//catabolic process;GO:0016043//cellular component organization;GO:0044237//cellular metabolic process;GO:0008150//biological_process;GO:0071840//cellular component organization or biogenesis;GO:0009987//cellular process;GO:0005975//carbohydrate metabolic process;GO:0008152//metabolic process;GO:0044238//primary metabolic process;GO:0009058//biosynthetic process;GO:0071704//organic subs…
Bra004593	8	0.333333	1.24667	0.0566667	-4.45943	0.000253106	0.00438012	yes	AT2G40970 (E=3e-091) | myb family transcription factor	GO:0043229//intracellular organelle;GO:0005622//intracellular;GO:0043231//intracellular membrane-bounded organelle;GO:0044464//cell part;GO:0005575//cellular_component;GO:0044424//intracellular part;GO:0043226//organelle;GO:0005634//nucleus;GO:0043227//membrane-bounded organelle;GO:0005623//cell	GO:0044877//macromolecular complex binding;GO:0097159//organic cyclic compound binding;GO:0003682//chromatin binding;GO:0001071//nucleic acid binding transcription factor activity;GO:0005488//binding;GO:0003674//molecular_function;GO:0003700//transcription factor activity, sequence-specific DNA binding;GO:1901363//heterocyclic compound binding;GO:0003677//DNA binding;GO:0003676//nucleic acid bind…	GO:0006950//response to stress;GO:0006725//cellular aromatic compound metabolic process;GO:0044237//cellular metabolic process;GO:0034641//cellular nitrogen compound metabolic process;GO:0009058//biosynthetic process;GO:1901360//organic cyclic compound metabolic process;GO:0071704//organic substance metabolic process;GO:0008150//biological_process;GO:0046483//heterocycle metabolic process;GO:0050…
Bra004602	302	130	40.39	17.4633	-1.20967	1.74606e-05	0.000436118	yes	AT2G41160 (E=3e-114) | ubiquitin-associated (UBA)/TS-N domain-containing protein	GO:0016020//membrane;GO:0005575//cellular_component	GO:0003674//molecular_function;GO:0005515//protein binding;GO:0016787//hydrolase activity;GO:0005488//binding;GO:0003824//catalytic activity	-
Bra004621	0.666667	21.6667	0.233333	6.98667	4.90414	3.27164e-09	1.75657e-07	yes	-	-	-	-
Bra004622	79.6667	3.33333	5.7	0.25	-4.51096	2.73281e-15	3.05253e-13	yes	AT2G41450 (E=2e-093) | N-acetyltransferase	-	GO:0016740//transferase activity;GO:0003824//catalytic activity;GO:0003674//molecular_function	-
Bra004626	47	156.333	1.25333	4.02667	1.68382	1.1244e-07	4.54687e-06	yes	AT2G41520 (E=1e-277) | DNAJ heat shock N-terminal domain-containing protein	GO:0043226//organelle;GO:0005575//cellular_component;GO:0005737//cytoplasm;GO:0043231//intracellular membrane-bounded organelle;GO:0009536//plastid;GO:0044464//cell part;GO:0043227//membrane-bounded organelle;GO:0005622//intracellular;GO:0043229//intracellular organelle;GO:0044424//intracellular part;GO:0005623//cell;GO:0044444//cytoplasmic part	GO:0005515//protein binding;GO:0003824//catalytic activity;GO:0003674//molecular_function;GO:1901265//nucleoside phosphate binding;GO:0036094//small molecule binding;GO:1901363//heterocyclic compound binding;GO:0097159//organic cyclic compound binding;GO:0000166//nucleotide binding;GO:0005488//binding	GO:0009987//cellular process;GO:0008152//metabolic process;GO:0008150//biological_process
Bra004630	280	137	35.9733	17.1767	-1.06648	0.000122929	0.00238151	yes	AT2G41630 (E=6e-095) TFIIB | TFIIB (TRANSCRIPTION FACTOR II B); RNA polymerase II transcription factor/ protein binding / transcription regulator/ translation initiation factor/ zinc ion binding	-	GO:0003674//molecular_function;GO:0005488//binding;GO:0005515//protein binding	GO:0008150//biological_process;GO:0006725//cellular aromatic compound metabolic process;GO:0009058//biosynthetic process;GO:0044237//cellular metabolic process;GO:0071704//organic substance metabolic process;GO:1901360//organic cyclic compound metabolic process;GO:0008152//metabolic process;GO:0009987//cellular process;GO:0006139//nucleobase-containing compound metabolic process;GO:0006807//nitro…
Bra004641	168.667	86.3333	15.9533	7.86333	-1.02064	0.000506156	0.00792631	yes	AT2G41710 (E=5e-164) | ovule development protein, putative	GO:0043226//organelle;GO:0005623//cell;GO:0005575//cellular_component;GO:0044424//intracellular part;GO:0044464//cell part;GO:0043231//intracellular membrane-bounded organelle;GO:0043227//membrane-bounded organelle;GO:0043229//intracellular organelle;GO:0005634//nucleus;GO:0005622//intracellular	GO:0003700//transcription factor activity, sequence-specific DNA binding;GO:0001071//nucleic acid binding transcription factor activity;GO:0097159//organic cyclic compound binding;GO:0003676//nucleic acid binding;GO:0005488//binding;GO:0003677//DNA binding;GO:0003674//molecular_function;GO:1901363//heterocyclic compound binding	GO:0044707//single-multicellular organism process;GO:0006807//nitrogen compound metabolic process;GO:0009058//biosynthetic process;GO:0008150//biological_process;GO:0009987//cellular process;GO:0006139//nucleobase-containing compound metabolic process;GO:0044767//single-organism developmental process;GO:0007275//multicellular organism development;GO:0032501//multicellular organismal process;GO:00…
Bra004642	27.3333	197.667	1.31667	9.08667	2.78686	3.92207e-17	5.28669e-15	yes	AT2G41720 (E=0.0) EMB2654 | EMB2654 (EMBRYO DEFECTIVE 2654)	-	GO:0003674//molecular_function;GO:0005488//binding;GO:0005515//protein binding	-
Bra004668	73	8	10.6567	1.11	-3.26312	3.85794e-13	3.51294e-11	yes	AT2G42070 (E=3e-118) ATNUDT23, ATNUDX23 | ATNUDX23 (ARABIDOPSIS THALIANA NUDIX HYDROLASE HOMOLOG 23); FAD diphosphatase/ hydrolase	-	GO:0003824//catalytic activity;GO:0003674//molecular_function;GO:0016787//hydrolase activity	-
Bra004669	20	6.33333	2.94667	0.926667	-1.66896	0.00406666	0.0438696	yes	-	-	-	-
Bra004673	95.3333	30.3333	26.31	8.49667	-1.63064	0.000855288	0.0123077	yes	-	-	-	-
Bra004676	22.3333	233.333	1.41667	14.4533	3.35083	3.7625e-24	9.46431e-22	yes	AT2G42230 (E=3e-207) | tubulin-specific chaperone C-related	-	-	GO:0016043//cellular component organization;GO:0009987//cellular process;GO:0032502//developmental process;GO:0048856//anatomical structure development;GO:0008150//biological_process;GO:0071840//cellular component organization or biogenesis;GO:0009653//anatomical structure morphogenesis
Bra004715	1703.33	583	163.83	52.84	-1.6325	2.65942e-10	1.70941e-08	yes	-	-	-	-
Bra004720	108.333	28	8.28333	2.09333	-1.98441	2.01103e-06	6.26164e-05	yes	AT2G42790 (E=4e-271) CSY3 | CSY3 (citrate synthase 3); citrate (SI)-synthase	GO:0005623//cell;GO:0005737//cytoplasm;GO:0005622//intracellular;GO:0043231//intracellular membrane-bounded organelle;GO:0005777//peroxisome;GO:0005575//cellular_component;GO:0043226//organelle;GO:0044444//cytoplasmic part;GO:0042579//microbody;GO:0044464//cell part;GO:0043229//intracellular organelle;GO:0044424//intracellular part;GO:0043227//membrane-bounded organelle	GO:0016740//transferase activity;GO:0003674//molecular_function;GO:0003824//catalytic activity	GO:0006950//response to stress;GO:0043170//macromolecule metabolic process;GO:0009056//catabolic process;GO:0016043//cellular component organization;GO:0044238//primary metabolic process;GO:0071840//cellular component organization or biogenesis;GO:0006629//lipid metabolic process;GO:0009987//cellular process;GO:0005975//carbohydrate metabolic process;GO:0006091//generation of precursor metabolite…
Bra004726	145.333	51	23.7567	8.03667	-1.56366	3.94274e-07	1.43131e-05	yes	AT2G42670 (E=5e-122) | unknown protein	-	GO:0003674//molecular_function;GO:0003824//catalytic activity	GO:0008150//biological_process;GO:0008152//metabolic process
Bra004728	34.3333	128.667	1.80333	6.75	1.90422	4.04035e-08	1.81283e-06	yes	AT2G42890 (E=8e-167) AML2 | AML2 (ARABIDOPSIS-MEI2-LIKE 2); RNA binding / nucleic acid binding / nucleotide binding	-	GO:0097159//organic cyclic compound binding;GO:0005488//binding;GO:0003676//nucleic acid binding;GO:0000166//nucleotide binding;GO:0003674//molecular_function;GO:1901363//heterocyclic compound binding;GO:1901265//nucleoside phosphate binding;GO:0036094//small molecule binding	-
Bra004739	0	5.33333	0.001	0.383333	8.58246	0.000475295	0.00750725	yes	AT2G43050 (E=5e-212) ATPMEPCRD | ATPMEPCRD; enzyme inhibitor/ pectinesterase	GO:0071944//cell periphery;GO:0044464//cell part;GO:0005618//cell wall;GO:0005623//cell;GO:0005575//cellular_component;GO:0030312//external encapsulating structure	GO:0003674//molecular_function;GO:0003824//catalytic activity;GO:0030234//enzyme regulator activity;GO:0016787//hydrolase activity;GO:0098772//molecular function regulator	GO:0008152//metabolic process;GO:0071704//organic substance metabolic process;GO:0044238//primary metabolic process;GO:0071840//cellular component organization or biogenesis;GO:0009056//catabolic process;GO:0005975//carbohydrate metabolic process;GO:0016043//cellular component organization;GO:0009987//cellular process;GO:0008150//biological_process
Bra004745	69.3333	155	9.68	21.2267	1.1328	0.000216207	0.00383933	yes	-	-	-	-
Bra004748	19	2.66667	2.39667	0.353333	-2.76193	2.67875e-05	0.000640535	yes	AT2G43140 (E=8e-087) | DNA binding / transcription factor	-	GO:0005515//protein binding;GO:0003674//molecular_function;GO:0005488//binding	-
Bra004753	6.33333	0.333333	0.443333	0.0266667	-4.05528	0.00406299	0.0438649	yes	-	-	-	-
Bra004755	17.6667	1.33333	1.63333	0.133333	-3.61471	1.19441e-06	3.93772e-05	yes	AT2G43260 (E=5e-162) | F-box family protein / S locus-related	-	GO:0003674//molecular_function;GO:0005488//binding;GO:0005515//protein binding	-
Bra004771	1	10.6667	0.143333	1.33333	3.21759	0.000923875	0.0131291	yes	AT2G43570 (E=2e-110) | chitinase, putative	GO:0071944//cell periphery;GO:0030312//external encapsulating structure;GO:0005576//extracellular region;GO:0044464//cell part;GO:0005618//cell wall;GO:0005623//cell;GO:0005575//cellular_component	GO:0003674//molecular_function;GO:0003824//catalytic activity;GO:0005488//binding;GO:0016787//hydrolase activity	GO:0008150//biological_process;GO:0009987//cellular process;GO:0071704//organic substance metabolic process;GO:0009056//catabolic process;GO:0005975//carbohydrate metabolic process;GO:0044238//primary metabolic process;GO:0008152//metabolic process
Bra004784	26.3333	74.6667	2.61333	7.22	1.46611	8.05727e-05	0.00165956	yes	AT2G43790 (E=1e-220) ATMPK6, MPK6, MAPK6 | ATMPK6 (ARABIDOPSIS THALIANA MAP KINASE 6); MAP kinase/ kinase	-	GO:0016740//transferase activity;GO:0036094//small molecule binding;GO:0016772//transferase activity, transferring phosphorus-containing groups;GO:0005488//binding;GO:0003674//molecular_function;GO:0003824//catalytic activity;GO:0097159//organic cyclic compound binding;GO:1901265//nucleoside phosphate binding;GO:1901363//heterocyclic compound binding;GO:0016301//kinase activity;GO:0000166//nucleo…	GO:0044699//single-organism process;GO:0044763//single-organism cellular process;GO:0044267//cellular protein metabolic process;GO:0065007//biological regulation;GO:0008150//biological_process;GO:0043170//macromolecule metabolic process;GO:0023052//signaling;GO:0009987//cellular process;GO:0007154//cell communication;GO:0051716//cellular response to stimulus;GO:0043412//macromolecule modification…
Bra004797	22.3333	4.66667	1.74667	0.376667	-2.21324	0.00349162	0.0387573	yes	AT2G43990 (E=8e-067) | unknown protein	-	-	GO:0022414//reproductive process;GO:0044260//cellular macromolecule metabolic process;GO:0071704//organic substance metabolic process;GO:0048608//reproductive structure development;GO:0032502//developmental process;GO:0044238//primary metabolic process;GO:0006464//cellular protein modification process;GO:0044702//single organism reproductive process;GO:0043412//macromolecule modification;GO:00905…
Bra004807	65	6.33333	5.95	0.526667	-3.49793	1.37066e-10	9.08443e-09	yes	AT2G44130 (E=1e-095) | kelch repeat-containing F-box family protein	-	GO:0005488//binding;GO:0003674//molecular_function;GO:0005515//protein binding	-
Bra004812	574.667	242.667	52.7967	21.9867	-1.26382	8.81455e-08	3.62873e-06	yes	-	-	-	-
Bra004815	20.6667	6.66667	2.36	0.74	-1.67319	0.00454179	0.0476492	yes	-	-	-	-
Bra004817	104	4.33333	7.62	0.296667	-4.68288	5.13438e-20	9.26683e-18	yes	-	-	-	-
Bra004835	251.333	1036	19.2867	78.24	2.0203	4.31137e-19	7.13633e-17	yes	AT2G44450 (E=9e-265) BGLU15 | BGLU15 (BETA GLUCOSIDASE 15); catalytic/ cation binding / hydrolase, hydrolyzing O-glycosyl compounds	-	GO:0003824//catalytic activity;GO:0003674//molecular_function;GO:0016787//hydrolase activity	GO:0071704//organic substance metabolic process;GO:0008152//metabolic process;GO:0005975//carbohydrate metabolic process;GO:0008150//biological_process;GO:0044238//primary metabolic process
Bra004836	35	0.333333	2.76667	0.02	-7.11201	3.41101e-11	2.44323e-09	yes	AT2G44450 (E=3e-247) BGLU15 | BGLU15 (BETA GLUCOSIDASE 15); catalytic/ cation binding / hydrolase, hydrolyzing O-glycosyl compounds	-	GO:0003824//catalytic activity;GO:0016787//hydrolase activity;GO:0003674//molecular_function	GO:0008150//biological_process;GO:0005975//carbohydrate metabolic process;GO:0008152//metabolic process;GO:0071704//organic substance metabolic process;GO:0044238//primary metabolic process
Bra004837	7.66667	33.3333	0.26	1.13	2.11974	5.57647e-05	0.00120136	yes	AT2G44460 (E=6e-267) BGLU28 | BGLU28 (BETA GLUCOSIDASE 28); catalytic/ cation binding / hydrolase, hydrolyzing O-glycosyl compounds	GO:0016020//membrane;GO:0005575//cellular_component	GO:0003824//catalytic activity;GO:0016787//hydrolase activity;GO:0003674//molecular_function	GO:0005975//carbohydrate metabolic process;GO:0008152//metabolic process;GO:0071704//organic substance metabolic process;GO:0008150//biological_process;GO:0044238//primary metabolic process
Bra004839	0	7.33333	0.001	0.736667	9.52487	0.00116435	0.0158215	yes	AT2G44490 (E=1e-220) PEN2, BGLU26 | PEN2 (PENETRATION 2); hydrolase, hydrolyzing O-glycosyl compounds / thioglucosidase	GO:0005777//peroxisome;GO:0044444//cytoplasmic part;GO:0043231//intracellular membrane-bounded organelle;GO:0044464//cell part;GO:0005575//cellular_component;GO:0042579//microbody;GO:0005623//cell;GO:0016020//membrane;GO:0043226//organelle;GO:0043227//membrane-bounded organelle;GO:0043229//intracellular organelle;GO:0005737//cytoplasm;GO:0005622//intracellular;GO:0009536//plastid;GO:0044424//intr…	GO:0016787//hydrolase activity;GO:0003674//molecular_function;GO:0003824//catalytic activity	GO:0044237//cellular metabolic process;GO:0006950//response to stress;GO:0051234//establishment of localization;GO:0051716//cellular response to stimulus;GO:0071704//organic substance metabolic process;GO:0015979//photosynthesis;GO:0065008//regulation of biological quality;GO:0005975//carbohydrate metabolic process;GO:0006810//transport;GO:0044763//single-organism cellular process;GO:0019748//sec…
Bra004841	183	449.667	13.7267	32.5367	1.24509	0.000295053	0.00501104	yes	-	-	-	-
Bra004844	0	414.503	0.001	29.78	14.8621	3.11001e-37	1.65587e-34	yes	AT2G44560 (E=2e-212) AtGH9B11 | AtGH9B11 (Arabidopsis thaliana glycosyl hydrolase 9B11); catalytic/ hydrolase, hydrolyzing O-glycosyl compounds	-	GO:0016787//hydrolase activity;GO:0003824//catalytic activity;GO:0003674//molecular_function	GO:0071704//organic substance metabolic process;GO:0009056//catabolic process;GO:0008152//metabolic process;GO:0044238//primary metabolic process;GO:0005975//carbohydrate metabolic process;GO:0009987//cellular process;GO:0008150//biological_process
Bra004856	112.667	241	16.79	34.5533	1.04122	9.52626e-05	0.00192368	yes	AT2G44680 (E=6e-098) CKB4 | CKB4 (CASEIN KINASE II BETA SUBUNIT 4); protein serine/threonine kinase	GO:0005622//intracellular;GO:0005623//cell;GO:0005575//cellular_component;GO:0044464//cell part	GO:0030234//enzyme regulator activity;GO:0003674//molecular_function;GO:0098772//molecular function regulator	GO:0009987//cellular process;GO:0071704//organic substance metabolic process;GO:0044237//cellular metabolic process;GO:0019538//protein metabolic process;GO:0006464//cellular protein modification process;GO:0044238//primary metabolic process;GO:0008152//metabolic process;GO:0043170//macromolecule metabolic process;GO:0008150//biological_process;GO:0036211//protein modification process;GO:0043412/…
Bra004857	0	13.3333	0.001	2.46	11.2644	1.64879e-07	6.44703e-06	yes	AT2G44690 (E=3e-098) ARAC9, ATROP8, ROP8 | ARAC9; GTP binding	GO:0005886//plasma membrane;GO:0016020//membrane;GO:0005622//intracellular;GO:0071944//cell periphery;GO:0044464//cell part;GO:0005623//cell;GO:0005575//cellular_component	GO:0036094//small molecule binding;GO:0003674//molecular_function;GO:0097159//organic cyclic compound binding;GO:0005488//binding;GO:1901363//heterocyclic compound binding;GO:0000166//nucleotide binding;GO:1901265//nucleoside phosphate binding	GO:0071840//cellular component organization or biogenesis;GO:0051716//cellular response to stimulus;GO:0008150//biological_process;GO:0044767//single-organism developmental process;GO:0009653//anatomical structure morphogenesis;GO:0007165//signal transduction;GO:0048869//cellular developmental process;GO:0007154//cell communication;GO:0030154//cell differentiation;GO:0050896//response to stimulus…
Bra004859	71.6667	314	9.25667	38.8267	2.06848	1.28427e-13	1.23205e-11	yes	AT2G44730 (E=1e-046) | transcription factor	-	GO:0003674//molecular_function;GO:0044877//macromolecular complex binding;GO:0003682//chromatin binding;GO:0005488//binding	-
Bra004872	154	64	8.65667	3.44333	-1.33001	3.44791e-05	0.00079586	yes	AT2G44830 (E=5e-262) | protein kinase, putative	-	GO:1901363//heterocyclic compound binding;GO:0036094//small molecule binding;GO:0097159//organic cyclic compound binding;GO:0016740//transferase activity;GO:1901265//nucleoside phosphate binding;GO:0003824//catalytic activity;GO:0005488//binding;GO:0016301//kinase activity;GO:0016772//transferase activity, transferring phosphorus-containing groups;GO:0000166//nucleotide binding;GO:0003674//molecu…	GO:0071704//organic substance metabolic process;GO:0044267//cellular protein metabolic process;GO:0044237//cellular metabolic process;GO:0006464//cellular protein modification process;GO:0044260//cellular macromolecule metabolic process;GO:0036211//protein modification process;GO:0019538//protein metabolic process;GO:0044238//primary metabolic process;GO:0009987//cellular process;GO:0008152//meta…
Bra004881	220	74	13.2067	4.43333	-1.5748	9.318e-07	3.15666e-05	yes	AT2G44980 (E=5e-215) | transcription regulatory protein SNF2, putative	-	GO:0036094//small molecule binding;GO:0003677//DNA binding;GO:0000166//nucleotide binding;GO:0097159//organic cyclic compound binding;GO:0003676//nucleic acid binding;GO:0016787//hydrolase activity;GO:1901265//nucleoside phosphate binding;GO:1901363//heterocyclic compound binding;GO:0005488//binding;GO:0003824//catalytic activity;GO:0003674//molecular_function	-
Bra004892	1693.33	3701	52.25	108.51	1.05433	8.76865e-06	0.000238444	yes	AT2G40360 (E=0.0) | transducin family protein / WD-40 repeat family protein	GO:0043233//organelle lumen;GO:0044422//organelle part;GO:0005623//cell;GO:0071944//cell periphery;GO:0043232//intracellular non-membrane-bounded organelle;GO:0043227//membrane-bounded organelle;GO:0044446//intracellular organelle part;GO:0005575//cellular_component;GO:0005622//intracellular;GO:0005618//cell wall;GO:0043226//organelle;GO:0005634//nucleus;GO:0043231//intracellular membrane-bounded…	GO:0003824//catalytic activity;GO:0030234//enzyme regulator activity;GO:0016787//hydrolase activity;GO:0003674//molecular_function;GO:0005515//protein binding;GO:0098772//molecular function regulator;GO:0005488//binding	GO:0006139//nucleobase-containing compound metabolic process;GO:0009987//cellular process;GO:0071704//organic substance metabolic process;GO:0005975//carbohydrate metabolic process;GO:0006807//nitrogen compound metabolic process;GO:0071840//cellular component organization or biogenesis;GO:0009056//catabolic process;GO:0016043//cellular component organization;GO:0008152//metabolic process;GO:00346…
Bra004894	141.667	338.333	13.7033	31.22	1.18794	3.93802e-06	0.000114576	yes	-	-	-	-
Bra004907	10.6667	42.6667	1.31333	5.28333	2.00822	1.43038e-05	0.000367618	yes	AT2G45400 (E=2e-132) BEN1 | BEN1; binding / catalytic/ coenzyme binding / oxidoreductase, acting on CH-OH group of donors	-	GO:0003824//catalytic activity;GO:0005488//binding;GO:0003674//molecular_function	GO:0009987//cellular process;GO:0008150//biological_process;GO:0008152//metabolic process
Bra004910	8.66667	47.6667	1.36333	6.86333	2.33177	8.76982e-06	0.000238444	yes	-	-	-	-
Bra004914	467.667	226	21.07	10.11	-1.05941	2.77196e-05	0.000658876	yes	AT2G45460 (E=0.0) | forkhead-associated domain-containing protein / FHA domain-containing protein	-	GO:0005488//binding;GO:0005515//protein binding;GO:0001071//nucleic acid binding transcription factor activity;GO:0003700//transcription factor activity, sequence-specific DNA binding;GO:0003674//molecular_function	GO:0009987//cellular process;GO:0046483//heterocycle metabolic process;GO:0009058//biosynthetic process;GO:1901360//organic cyclic compound metabolic process;GO:0006725//cellular aromatic compound metabolic process;GO:0008152//metabolic process;GO:0044237//cellular metabolic process;GO:0044238//primary metabolic process;GO:0008150//biological_process;GO:0006807//nitrogen compound metabolic proces…
Bra004921	44.6667	3	3.38333	0.216667	-3.9649	2.6614e-12	2.19693e-10	yes	AT2G45580 (E=1e-212) CYP76C3 | CYP76C3; electron carrier/ heme binding / iron ion binding / monooxygenase/ oxygen binding	-	GO:0005488//binding;GO:0003824//catalytic activity;GO:0003674//molecular_function	GO:0008150//biological_process;GO:0008152//metabolic process
Bra004922	4.66667	19.2533	0.573333	2.38	2.05352	0.000727444	0.0107339	yes	-	-	-	-
Bra004931	89.3333	40.6667	6.49667	2.83	-1.1989	0.00100219	0.0140089	yes	AT2G45720 (E=4e-233) | armadillo/beta-catenin repeat family protein	-	GO:0003674//molecular_function;GO:0005488//binding;GO:0005515//protein binding	-
Bra004933	200.333	90.3333	12.3	5.4	-1.18763	4.56879e-05	0.0010164	yes	AT2G45750 (E=0.0) | dehydration-responsive family protein	-	GO:0003674//molecular_function;GO:0003824//catalytic activity;GO:0016740//transferase activity	GO:0008152//metabolic process;GO:0008150//biological_process
Bra004954	268	82.3333	38.7867	12.0167	-1.69052	3.30644e-08	1.50681e-06	yes	AT2G45990 (E=2e-136) | unknown protein	GO:0043229//intracellular organelle;GO:0009536//plastid;GO:0043227//membrane-bounded organelle;GO:0043231//intracellular membrane-bounded organelle;GO:0043226//organelle;GO:0044424//intracellular part;GO:0005575//cellular_component;GO:0005623//cell;GO:0044444//cytoplasmic part;GO:0005737//cytoplasm;GO:0044464//cell part;GO:0005622//intracellular	-	GO:0008152//metabolic process;GO:0015979//photosynthesis;GO:0009058//biosynthetic process;GO:0071840//cellular component organization or biogenesis;GO:0008150//biological_process;GO:0016043//cellular component organization;GO:0044237//cellular metabolic process;GO:0006091//generation of precursor metabolites and energy;GO:0009987//cellular process
Bra004955	59.3333	0.333333	11.2033	0.0666667	-7.39275	6.91076e-20	1.22651e-17	yes	-	-	-	-
Bra004989	185.667	467.333	26.1633	61.89	1.24216	8.06208e-06	0.000220885	yes	AT2G40100 (E=1e-133) LHCB4.3 | LHCB4.3 (light harvesting complex PSII); chlorophyll binding	GO:0043231//intracellular membrane-bounded organelle;GO:0005575//cellular_component;GO:0016020//membrane;GO:0005622//intracellular;GO:0044464//cell part;GO:0009579//thylakoid;GO:0005623//cell;GO:0043229//intracellular organelle;GO:0043226//organelle;GO:0044424//intracellular part;GO:0044444//cytoplasmic part;GO:0043227//membrane-bounded organelle;GO:0009536//plastid;GO:0005737//cytoplasm	GO:0005488//binding;GO:0003674//molecular_function	GO:0006807//nitrogen compound metabolic process;GO:0008152//metabolic process;GO:0015979//photosynthesis;GO:0043412//macromolecule modification;GO:0071704//organic substance metabolic process;GO:0046483//heterocycle metabolic process;GO:0006725//cellular aromatic compound metabolic process;GO:1901360//organic cyclic compound metabolic process;GO:0006139//nucleobase-containing compound metabolic p…
Bra005013	153.333	52.6667	24.0033	7.93667	-1.59663	6.4349e-07	2.25405e-05	yes	AT2G39795 (E=2e-093) | mitochondrial glycoprotein family protein / MAM33 family protein	GO:0043226//organelle;GO:0005739//mitochondrion;GO:0043227//membrane-bounded organelle;GO:0005575//cellular_component;GO:0044444//cytoplasmic part;GO:0005622//intracellular;GO:0043229//intracellular organelle;GO:0044464//cell part;GO:0043231//intracellular membrane-bounded organelle;GO:0044424//intracellular part;GO:0005623//cell;GO:0005737//cytoplasm	-	-
Bra005018	1020	470.333	57.2667	25.5567	-1.164	3.94994e-08	1.77725e-06	yes	AT2G39750 (E=0.0) | dehydration-responsive family protein	-	GO:0003824//catalytic activity;GO:0003674//molecular_function;GO:0016740//transferase activity	GO:0008150//biological_process;GO:0008152//metabolic process
Bra005019	307.623	154.48	25.5433	11.8967	-1.10239	0.00120767	0.0163406	yes	AT2G39730 (E=2e-259) RCA | RCA (RUBISCO ACTIVASE); ADP binding / ATP binding / enzyme regulator/ ribulose-1,5-bisphosphate carboxylase/oxygenase activator	-	GO:0097159//organic cyclic compound binding;GO:1901363//heterocyclic compound binding;GO:0003674//molecular_function;GO:1901265//nucleoside phosphate binding;GO:0036094//small molecule binding;GO:0000166//nucleotide binding;GO:0005488//binding	-
Bra005023	53.73	6.67333	8.82667	1.04333	-3.08067	3.90182e-07	1.41968e-05	yes	AT1G53750 (E=8e-136) RPT1A | RPT1A (REGULATORY PARTICLE TRIPLE-A 1A); ATPase	-	GO:1901265//nucleoside phosphate binding;GO:0003674//molecular_function;GO:0097159//organic cyclic compound binding;GO:0005488//binding;GO:0000166//nucleotide binding;GO:0016787//hydrolase activity;GO:1901363//heterocyclic compound binding;GO:0036094//small molecule binding;GO:0003824//catalytic activity	-
Bra005028	421.667	914.667	36.6833	74.3867	1.01992	0.000290189	0.00493912	yes	AT2G39640 (E=1e-194) | glycosyl hydrolase family 17 protein	-	GO:0016787//hydrolase activity;GO:0003674//molecular_function;GO:0003824//catalytic activity	GO:0008152//metabolic process;GO:0005975//carbohydrate metabolic process;GO:0044238//primary metabolic process;GO:0071704//organic substance metabolic process;GO:0008150//biological_process
Bra005031	45	156.667	5.34333	18.1267	1.7623	1.56067e-08	7.53127e-07	yes	AT2G39550 (E=2e-172) ATGGT-IB, GGB, PGGT-I | PGGT-I; CAAX-protein geranylgeranyltransferase/ protein heterodimerization	-	GO:0016740//transferase activity;GO:0003674//molecular_function;GO:0003824//catalytic activity	GO:0065007//biological regulation;GO:0044260//cellular macromolecule metabolic process;GO:0007154//cell communication;GO:0051716//cellular response to stimulus;GO:0009628//response to abiotic stimulus;GO:0006464//cellular protein modification process;GO:0044700//single organism signaling;GO:0009719//response to endogenous stimulus;GO:0071704//organic substance metabolic process;GO:0050896//respon…
Bra005032	4	30	0.876667	6.77	2.94906	2.33333e-06	7.18117e-05	yes	AT2G39518 (E=2e-052) | FUNCTIONS IN: molecular_function unknown; INVOLVED IN: biological_process unknown; LOCATED IN: endomembrane system; CONTAINS InterPro DOMAIN/s: Uncharacterised protein family UPF0497, trans-membrane plant (InterPro:IPR006702), Uncharacterised protein family UPF0497, trans-membrane plant subgroup (InterPro:IPR006459); BEST Arabidopsis thaliana protein match is: integral memb…	GO:0005623//cell;GO:0005575//cellular_component;GO:0005886//plasma membrane;GO:0016020//membrane;GO:0071944//cell periphery;GO:0044464//cell part	-	-
Bra005033	677.667	2901.67	70.6867	300.457	2.08765	1.20977e-16	1.53973e-14	yes	AT2G39510 (E=2e-189) | nodulin MtN21 family protein	GO:0005575//cellular_component;GO:0016020//membrane	GO:0005215//transporter activity;GO:0003674//molecular_function	GO:0008150//biological_process;GO:0051179//localization;GO:0009987//cellular process;GO:0006810//transport;GO:0051234//establishment of localization
Bra005050	137.333	331.833	5.38333	12.8	1.24957	1.91461e-06	5.99648e-05	yes	-	-	-	-
Bra005052	137.333	331.833	5.38333	12.8	1.24957	1.91229e-06	5.99509e-05	yes	-	-	-	-
Bra005058	25.3333	76	2.02	5.69667	1.49576	0.000441	0.00703705	yes	AT2G39220 (E=3e-239) PLP6, PLA IIB | PLP6 (PATATIN-LIKE PROTEIN 6); nutrient reservoir	-	GO:0003674//molecular_function;GO:0016787//hydrolase activity;GO:0003824//catalytic activity	GO:0008150//biological_process;GO:0044238//primary metabolic process;GO:0071704//organic substance metabolic process;GO:0044710//single-organism metabolic process;GO:0006629//lipid metabolic process;GO:0008152//metabolic process;GO:0044699//single-organism process;GO:0009056//catabolic process
Bra005061	417	102	34.7333	8.66333	-2.00333	7.75321e-10	4.60379e-08	yes	AT2G39130 (E=1e-212) | amino acid transporter family protein	GO:0016020//membrane;GO:0005575//cellular_component	-	-
Bra005071	6.50333	73.5367	0.513333	5.65333	3.46113	3.32043e-11	2.38369e-09	yes	AT2G38940 (E=1e-129) ATPT2, PHT1;4 | ATPT2 (ARABIDOPSIS THALIANA PHOSPHATE TRANSPORTER 2); carbohydrate transmembrane transporter/ inorganic phosphate transmembrane transporter/ phosphate transmembrane transporter/ sugar:hydrogen symporter	GO:0016020//membrane;GO:0005575//cellular_component	GO:0003674//molecular_function;GO:0005215//transporter activity	GO:0006810//transport;GO:0009987//cellular process;GO:0051179//localization;GO:0051234//establishment of localization;GO:0008150//biological_process
Bra005075	23	8.33333	3.35667	1.11667	-1.58783	0.00468021	0.0488448	yes	AT1G80070 (E=8e-114) SUS2, EMB33, EMB177, EMB14 | SUS2 (ABNORMAL SUSPENSOR 2)	GO:0005575//cellular_component;GO:0043231//intracellular membrane-bounded organelle;GO:0005623//cell;GO:0043227//membrane-bounded organelle;GO:0005634//nucleus;GO:0043229//intracellular organelle;GO:0005622//intracellular;GO:0044464//cell part;GO:0044424//intracellular part;GO:0043226//organelle	GO:1901363//heterocyclic compound binding;GO:0097159//organic cyclic compound binding;GO:0005488//binding;GO:0003676//nucleic acid binding;GO:0003674//molecular_function	GO:0044237//cellular metabolic process;GO:0044238//primary metabolic process;GO:0046483//heterocycle metabolic process;GO:0008150//biological_process;GO:0006725//cellular aromatic compound metabolic process;GO:0006139//nucleobase-containing compound metabolic process;GO:0034641//cellular nitrogen compound metabolic process;GO:0006807//nitrogen compound metabolic process;GO:0008152//metabolic proc…
Bra005104	24.3333	0.333333	2.08333	0.03	-6.11779	1.11696e-11	8.45555e-10	yes	AT2G38470 (E=3e-093) WRKY33, ATWRKY33 | WRKY33; transcription factor	-	GO:0003674//molecular_function;GO:1901363//heterocyclic compound binding;GO:0003676//nucleic acid binding;GO:0003677//DNA binding;GO:0005488//binding;GO:0003700//transcription factor activity, sequence-specific DNA binding;GO:0097159//organic cyclic compound binding;GO:0001071//nucleic acid binding transcription factor activity	GO:0008152//metabolic process;GO:0046483//heterocycle metabolic process;GO:0044238//primary metabolic process;GO:1901360//organic cyclic compound metabolic process;GO:0009058//biosynthetic process;GO:0008150//biological_process;GO:0071704//organic substance metabolic process;GO:0034641//cellular nitrogen compound metabolic process;GO:0009987//cellular process;GO:0006807//nitrogen compound metabol…
Bra005146	10	0	1.13333	0.001	-10.1464	1.49074e-06	4.80072e-05	yes	-	-	-	-
Bra005166	10.6667	0.666667	3.2	0.216667	-3.88452	0.000950767	0.0134157	yes	AT2G28700 (E=8e-035) AGL46 | AGL46 (AGAMOUS-LIKE 46); DNA binding / transcription factor	GO:0005575//cellular_component;GO:0043227//membrane-bounded organelle;GO:0005622//intracellular;GO:0005623//cell;GO:0043229//intracellular organelle;GO:0044424//intracellular part;GO:0043231//intracellular membrane-bounded organelle;GO:0043226//organelle;GO:0005634//nucleus;GO:0044464//cell part	GO:0097159//organic cyclic compound binding;GO:0005515//protein binding;GO:0003677//DNA binding;GO:0003674//molecular_function;GO:0003676//nucleic acid binding;GO:0005488//binding;GO:1901363//heterocyclic compound binding	GO:0006725//cellular aromatic compound metabolic process;GO:0071704//organic substance metabolic process;GO:0006807//nitrogen compound metabolic process;GO:0046483//heterocycle metabolic process;GO:1901360//organic cyclic compound metabolic process;GO:0009987//cellular process;GO:0034641//cellular nitrogen compound metabolic process;GO:0008152//metabolic process;GO:0009058//biosynthetic process;G…
Bra005174	8	48.6667	1.15	6.81333	2.56673	8.64944e-06	0.000235965	yes	AT5G02230 (E=3e-107) | haloacid dehalogenase-like hydrolase family protein	-	GO:0016787//hydrolase activity;GO:0003674//molecular_function;GO:0003824//catalytic activity	GO:0008152//metabolic process;GO:0008150//biological_process
Bra005177	10	112	1.09333	11.95	3.45021	6.54595e-16	7.83209e-14	yes	AT2G37630 (E=1e-161) ATPHAN, AS1, ATMYB91, MYB91 | AS1 (ASYMMETRIC LEAVES 1); DNA binding / protein homodimerization/ transcription factor	GO:0044464//cell part;GO:0043226//organelle;GO:0005622//intracellular;GO:0005634//nucleus;GO:0005575//cellular_component;GO:0043229//intracellular organelle;GO:0043227//membrane-bounded organelle;GO:0005623//cell;GO:0044424//intracellular part;GO:0043231//intracellular membrane-bounded organelle	GO:0003682//chromatin binding;GO:0003676//nucleic acid binding;GO:1901363//heterocyclic compound binding;GO:0003674//molecular_function;GO:0097159//organic cyclic compound binding;GO:0005488//binding;GO:0003677//DNA binding;GO:0044877//macromolecular complex binding	GO:0006139//nucleobase-containing compound metabolic process;GO:0009987//cellular process;GO:0032501//multicellular organismal process;GO:0009058//biosynthetic process;GO:0044699//single-organism process;GO:0034641//cellular nitrogen compound metabolic process;GO:0006807//nitrogen compound metabolic process;GO:0006725//cellular aromatic compound metabolic process;GO:0044237//cellular metabolic pr…
Bra005192	6.66667	0	0.9	0.001	-9.81378	5.88258e-05	0.00125871	yes	-	-	-	-
Bra005193	7.33333	49	0.76	4.81667	2.66396	1.36838e-08	6.67395e-07	yes	AT2G37460 (E=6e-197) | nodulin MtN21 family protein	GO:0016020//membrane;GO:0005575//cellular_component	GO:0003674//molecular_function;GO:0005215//transporter activity	GO:0008150//biological_process;GO:0051234//establishment of localization;GO:0009987//cellular process;GO:0006810//transport;GO:0051179//localization
Bra005206	35.3333	89.3333	1.28333	3.27	1.34939	0.00250987	0.0296243	yes	-	-	-	-
Bra005207	92.3333	218.93	2.53	6.02	1.25063	7.74948e-05	0.00160297	yes	AT2G37280 (E=0.0) PDR5, ATPDR5 | PDR5 (PLEIOTROPIC DRUG RESISTANCE 5); ATPase, coupled to transmembrane movement of substances	GO:0005575//cellular_component;GO:0016020//membrane	GO:0003824//catalytic activity;GO:0097159//organic cyclic compound binding;GO:0016787//hydrolase activity;GO:0000166//nucleotide binding;GO:1901265//nucleoside phosphate binding;GO:0036094//small molecule binding;GO:0003674//molecular_function;GO:0005488//binding;GO:1901363//heterocyclic compound binding	-
Bra005210	51.3333	4.33333	4.86	0.376667	-3.6896	1.42179e-11	1.06372e-09	yes	AT2G37260 (E=8e-101) TTG2, ATWRKY44, WRKY44, DSL1 | TTG2 (TRANSPARENT TESTA GLABRA 2); transcription factor	-	GO:0003674//molecular_function;GO:0097159//organic cyclic compound binding;GO:0001071//nucleic acid binding transcription factor activity;GO:0003676//nucleic acid binding;GO:0005488//binding;GO:0003700//transcription factor activity, sequence-specific DNA binding;GO:0003677//DNA binding;GO:1901363//heterocyclic compound binding	GO:0009987//cellular process;GO:0071704//organic substance metabolic process;GO:0044238//primary metabolic process;GO:0034641//cellular nitrogen compound metabolic process;GO:0006139//nucleobase-containing compound metabolic process;GO:0009058//biosynthetic process;GO:0006725//cellular aromatic compound metabolic process;GO:0008150//biological_process;GO:0044237//cellular metabolic process;GO:190…
Bra005241	497	76.3333	38.3433	5.91	-2.69775	1.02296e-10	6.90896e-09	yes	AT2G36800 (E=7e-240) DOGT1, UGT73C5 | DOGT1 (DON-GLUCOSYLTRANSFERASE 1); UDP-glycosyltransferase/ cis-zeatin O-beta-D-glucosyltransferase/ glucosyltransferase/ quercetin 4'-O-glucosyltransferase/ quercetin 7-O-glucosyltransferase/ trans-zeatin O-beta-D-glucosyltransferase/ transferase, transf	-	GO:0003824//catalytic activity;GO:0016740//transferase activity;GO:0003674//molecular_function	GO:0008150//biological_process;GO:0008152//metabolic process
Bra005242	0	29.3333	0.001	2.37	11.2107	3.75118e-09	2.00729e-07	yes	AT2G36800 (E=5e-244) DOGT1, UGT73C5 | DOGT1 (DON-GLUCOSYLTRANSFERASE 1); UDP-glycosyltransferase/ cis-zeatin O-beta-D-glucosyltransferase/ glucosyltransferase/ quercetin 4'-O-glucosyltransferase/ quercetin 7-O-glucosyltransferase/ trans-zeatin O-beta-D-glucosyltransferase/ transferase, transf	-	GO:0003824//catalytic activity;GO:0016740//transferase activity;GO:0003674//molecular_function	GO:0008150//biological_process;GO:0008152//metabolic process
Bra005243	35	3.66667	2.89667	0.323333	-3.1633	0.000245877	0.00428521	yes	AT2G36770 (E=4e-209) | UDP-glucoronosyl/UDP-glucosyl transferase family protein	-	GO:0016740//transferase activity;GO:0003674//molecular_function;GO:0003824//catalytic activity	GO:0008150//biological_process;GO:0008152//metabolic process
Bra005267	28.3333	122.333	2.71	11.01	2.02245	8.62136e-08	3.57686e-06	yes	-	-	-	-
Bra005282	22	122	5.30667	27.9733	2.39817	5.17015e-11	3.60623e-09	yes	AT2G36320 (E=1e-065) | zinc finger (AN1-like) family protein	-	GO:0003676//nucleic acid binding;GO:0003677//DNA binding;GO:1901363//heterocyclic compound binding;GO:0003674//molecular_function;GO:0005488//binding;GO:0097159//organic cyclic compound binding	-
Bra005301	0.666667	11.6667	0.106667	1.74	4.02791	1.67965e-05	0.000422173	yes	AT2G36080 (E=1e-091) | DNA-binding protein, putative	GO:0043231//intracellular membrane-bounded organelle;GO:0044424//intracellular part;GO:0043226//organelle;GO:0005634//nucleus;GO:0005575//cellular_component;GO:0043229//intracellular organelle;GO:0044464//cell part;GO:0005623//cell;GO:0005622//intracellular;GO:0043227//membrane-bounded organelle	GO:0003676//nucleic acid binding;GO:0003677//DNA binding;GO:1901363//heterocyclic compound binding;GO:0005488//binding;GO:0003674//molecular_function;GO:0097159//organic cyclic compound binding	GO:0006725//cellular aromatic compound metabolic process;GO:0071704//organic substance metabolic process;GO:0009987//cellular process;GO:0046483//heterocycle metabolic process;GO:0008150//biological_process;GO:0044238//primary metabolic process;GO:1901360//organic cyclic compound metabolic process;GO:0044237//cellular metabolic process;GO:0008152//metabolic process;GO:0006139//nucleobase-containi…
Bra005306	232	503.667	20.4767	42.7467	1.06183	5.29852e-05	0.00115304	yes	-	-	-	-
Bra005314	23.6667	70.3333	4.52	12.75	1.4961	0.000100428	0.00201146	yes	AT2G35700 (E=4e-068) ATERF38, ERF38 | ERF38 (ERF FAMILY PROTEIN 38); DNA binding / transcription factor	GO:0005634//nucleus;GO:0043226//organelle;GO:0043229//intracellular organelle;GO:0005575//cellular_component;GO:0005623//cell;GO:0043227//membrane-bounded organelle;GO:0005622//intracellular;GO:0044464//cell part;GO:0043231//intracellular membrane-bounded organelle;GO:0044424//intracellular part	GO:0003677//DNA binding;GO:0005488//binding;GO:0003674//molecular_function;GO:0003700//transcription factor activity, sequence-specific DNA binding;GO:1901363//heterocyclic compound binding;GO:0001071//nucleic acid binding transcription factor activity;GO:0097159//organic cyclic compound binding;GO:0003676//nucleic acid binding	GO:0044238//primary metabolic process;GO:0009987//cellular process;GO:0006725//cellular aromatic compound metabolic process;GO:0044237//cellular metabolic process;GO:1901360//organic cyclic compound metabolic process;GO:0008150//biological_process;GO:0006807//nitrogen compound metabolic process;GO:0009058//biosynthetic process;GO:0046483//heterocycle metabolic process;GO:0071704//organic substanc…
Bra005321	6	0	0.533333	0.001	-9.05889	0.000481831	0.00759377	yes	AT2G35615 (E=9e-197) | aspartyl protease family protein	-	GO:0003674//molecular_function;GO:0016787//hydrolase activity;GO:0003824//catalytic activity	GO:0008152//metabolic process;GO:0043170//macromolecule metabolic process;GO:0019538//protein metabolic process;GO:0008150//biological_process;GO:0071704//organic substance metabolic process;GO:0044238//primary metabolic process
Bra005338	68.3333	7	13.6233	1.29667	-3.3932	3.10585e-13	2.85935e-11	yes	-	-	-	-
Bra005341	1	77	0.11	8.53667	6.2781	2.3887e-22	5.41202e-20	yes	AT2G35450 (E=5e-173) | catalytic/ hydrolase	GO:0005623//cell;GO:0044424//intracellular part;GO:0005622//intracellular;GO:0043229//intracellular organelle;GO:0005575//cellular_component;GO:0005737//cytoplasm;GO:0044444//cytoplasmic part;GO:0043231//intracellular membrane-bounded organelle;GO:0043227//membrane-bounded organelle;GO:0043226//organelle;GO:0009536//plastid;GO:0044464//cell part	GO:0003824//catalytic activity;GO:0016787//hydrolase activity;GO:0003674//molecular_function	GO:0008152//metabolic process;GO:0008150//biological_process
Bra005350	125.333	347	6.6	17.6567	1.41968	1.90382e-07	7.34536e-06	yes	AT2G35350 (E=2e-142) PLL1 | PLL1 (POLTERGEIST LIKE 1); catalytic/ protein serine/threonine phosphatase	-	GO:0016787//hydrolase activity;GO:0003824//catalytic activity;GO:0003674//molecular_function	GO:0044238//primary metabolic process;GO:0044237//cellular metabolic process;GO:0044260//cellular macromolecule metabolic process;GO:0044267//cellular protein metabolic process;GO:0019538//protein metabolic process;GO:0036211//protein modification process;GO:0043412//macromolecule modification;GO:0043170//macromolecule metabolic process;GO:0008150//biological_process;GO:0071704//organic substance…
Bra005374	2	19.6667	0.213333	1.88667	3.14466	3.30103e-05	0.000767502	yes	AT2G35000 (E=5e-108) | zinc finger (C3HC4-type RING finger) family protein	-	GO:0003674//molecular_function;GO:0005515//protein binding;GO:0005488//binding;GO:0003824//catalytic activity;GO:0016740//transferase activity	GO:0044763//single-organism cellular process;GO:0019538//protein metabolic process;GO:0032501//multicellular organismal process;GO:0044237//cellular metabolic process;GO:0006464//cellular protein modification process;GO:0043170//macromolecule metabolic process;GO:0009605//response to external stimulus;GO:0044267//cellular protein metabolic process;GO:0048856//anatomical structure development;GO:0…
Bra005375	121.333	55.3333	15.2267	6.40333	-1.24971	0.00086242	0.0123824	yes	AT2G34990 (E=4e-071) | zinc finger (C3HC4-type RING finger) family protein	-	GO:0005488//binding;GO:0003674//molecular_function;GO:0005515//protein binding	GO:0006810//transport;GO:0051234//establishment of localization;GO:0051179//localization;GO:0008150//biological_process
Bra005381	24.3333	5	1.45	0.303333	-2.25708	4.36665e-05	0.000976187	yes	AT2G34920 (E=9e-191) EDA18 | EDA18 (embryo sac development arrest 18); protein binding / zinc ion binding	-	GO:0003674//molecular_function;GO:0005515//protein binding;GO:0005488//binding	-
Bra005384	838	403.667	53.16	25.62	-1.05307	0.00334835	0.0375189	yes	AT2G34890 (E=1e-279) | CTP synthase, putative / UTP--ammonia ligase, putative	-	GO:0003674//molecular_function;GO:0005488//binding;GO:0003824//catalytic activity;GO:0036094//small molecule binding;GO:0097159//organic cyclic compound binding;GO:1901265//nucleoside phosphate binding;GO:0000166//nucleotide binding;GO:1901363//heterocyclic compound binding	GO:0008150//biological_process;GO:1901360//organic cyclic compound metabolic process;GO:0046483//heterocycle metabolic process;GO:0006139//nucleobase-containing compound metabolic process;GO:0008152//metabolic process;GO:0009987//cellular process;GO:0044238//primary metabolic process;GO:0071704//organic substance metabolic process;GO:0006725//cellular aromatic compound metabolic process;GO:004423…
Bra005387	113.333	40.6667	9.62	3.50667	-1.45594	0.000161595	0.0030136	yes	AT1G30620 (E=4e-210) HSR8, MUR4, UXE1 | MUR4 (MURUS 4); UDP-arabinose 4-epimerase/ catalytic	-	GO:0003824//catalytic activity;GO:0005488//binding;GO:0003674//molecular_function	GO:0044238//primary metabolic process;GO:0008150//biological_process;GO:0009987//cellular process;GO:0005975//carbohydrate metabolic process;GO:0008152//metabolic process;GO:0071704//organic substance metabolic process
Bra005390	15.6667	1.33333	1.14	0.0833333	-3.774	2.04319e-06	6.34323e-05	yes	AT2G34810 (E=2e-279) | FAD-binding domain-containing protein	-	GO:0036094//small molecule binding;GO:1901265//nucleoside phosphate binding;GO:0003824//catalytic activity;GO:1901363//heterocyclic compound binding;GO:0003674//molecular_function;GO:0005488//binding;GO:0097159//organic cyclic compound binding;GO:0000166//nucleotide binding	GO:0008150//biological_process;GO:0008152//metabolic process
Bra005394	0.333333	14	0.0566667	2.27	5.32405	9.81401e-08	4.01432e-06	yes	AT2G34770 (E=1e-126) FAH1 | FAH1 (FATTY ACID HYDROXYLASE 1); catalytic/ fatty acid alpha-hydroxylase	-	GO:0003674//molecular_function;GO:0003824//catalytic activity;GO:0005488//binding	GO:0044710//single-organism metabolic process;GO:0016265//death;GO:0008150//biological_process;GO:0071704//organic substance metabolic process;GO:0044238//primary metabolic process;GO:0006629//lipid metabolic process;GO:0051234//establishment of localization;GO:0044699//single-organism process;GO:0044763//single-organism cellular process;GO:0006810//transport;GO:0008219//cell death;GO:0009987//ce…
Bra005399	7.33333	0.333333	1.68	0.06	-4.80735	0.000974912	0.0137261	yes	AT2G34700 (E=5e-079) | pollen Ole e 1 allergen and extensin family protein	-	GO:0003674//molecular_function;GO:0005198//structural molecule activity	-
Bra005400	38.6667	0	2.82	0.001	-11.4615	2.52827e-15	2.84395e-13	yes	AT1G58260 (E=2e-221) CYP79C2, CYP79C3P | CYP79C2 (CYTOCHROME P450 79C2); electron carrier/ heme binding / iron ion binding / monooxygenase/ oxygen binding	-	GO:0003674//molecular_function;GO:0003824//catalytic activity;GO:0005488//binding	GO:0008152//metabolic process;GO:0008150//biological_process
Bra005409	26	0.666667	5.83333	0.166667	-5.12928	3.05589e-11	2.20369e-09	yes	-	-	-	-
Bra005410	39.6667	8.66667	4.33333	0.926667	-2.22535	1.4323e-05	0.000367817	yes	AT4G38940 (E=5e-073) | kelch repeat-containing F-box family protein	-	GO:0005488//binding;GO:0005515//protein binding;GO:0003674//molecular_function	-
Bra005411	24.3333	4	1.70333	0.296667	-2.52145	2.22116e-05	0.000540419	yes	AT4G38940 (E=1e-074) | kelch repeat-containing F-box family protein	-	GO:0003674//molecular_function;GO:0005515//protein binding;GO:0005488//binding	-
Bra005420	14.3333	107.333	1.12333	8.11667	2.8531	2.09821e-13	1.97727e-11	yes	AT2G34500 (E=2e-226) CYP710A1 | CYP710A1 (cytochrome P450, family 710, subfamily A, polypeptide 1); C-22 sterol desaturase/ oxygen binding	-	GO:0003674//molecular_function;GO:0003824//catalytic activity;GO:0005488//binding	GO:0008150//biological_process;GO:0008152//metabolic process
Bra005423	30.17	7.70333	2.41667	0.58	-2.05889	0.000150001	0.00283883	yes	AT2G34420 (E=8e-101) LHB1B2, LHCB1.5 | LHB1B2; chlorophyll binding	GO:0005623//cell;GO:0005622//intracellular;GO:0044444//cytoplasmic part;GO:0009579//thylakoid;GO:0043226//organelle;GO:0009536//plastid;GO:0044424//intracellular part;GO:0005575//cellular_component;GO:0005737//cytoplasm;GO:0043229//intracellular organelle;GO:0016020//membrane;GO:0043227//membrane-bounded organelle;GO:0044464//cell part;GO:0043231//intracellular membrane-bounded organelle	GO:0003676//nucleic acid binding;GO:1901363//heterocyclic compound binding;GO:0003674//molecular_function;GO:0008135//translation factor activity, RNA binding;GO:0097159//organic cyclic compound binding;GO:0005488//binding;GO:0003723//RNA binding	GO:0044267//cellular protein metabolic process;GO:0009058//biosynthetic process;GO:0006412//translation;GO:0008150//biological_process;GO:0043412//macromolecule modification;GO:0006807//nitrogen compound metabolic process;GO:1901576//organic substance biosynthetic process;GO:0044237//cellular metabolic process;GO:0006518//peptide metabolic process;GO:0019538//protein metabolic process;GO:0008152/…
Bra005425	53.3367	1620.79	7.94	224.563	4.82184	4.50389e-42	3.19736e-39	yes	AT2G34430 (E=2e-149) LHB1B1, LHCB1.4 | LHB1B1; chlorophyll binding	GO:0044444//cytoplasmic part;GO:0043229//intracellular organelle;GO:0005575//cellular_component;GO:0043227//membrane-bounded organelle;GO:0009536//plastid;GO:0009579//thylakoid;GO:0044424//intracellular part;GO:0043231//intracellular membrane-bounded organelle;GO:0016020//membrane;GO:0005737//cytoplasm;GO:0043226//organelle;GO:0044464//cell part;GO:0005623//cell;GO:0005622//intracellular	GO:0005488//binding;GO:0003674//molecular_function	GO:0006091//generation of precursor metabolites and energy;GO:0006464//cellular protein modification process;GO:0015979//photosynthesis;GO:0043170//macromolecule metabolic process;GO:0044238//primary metabolic process;GO:0009987//cellular process;GO:0008150//biological_process;GO:0008152//metabolic process;GO:0044267//cellular protein metabolic process;GO:0043412//macromolecule modification;GO:00…
Bra005438	7268	3616	370.497	182.783	-1.01933	2.68383e-06	8.16471e-05	yes	AT2G34300 (E=0.0) | dehydration-responsive protein-related	GO:0012505//endomembrane system;GO:0005575//cellular_component;GO:0043229//intracellular organelle;GO:0043227//membrane-bounded organelle;GO:0005773//vacuole;GO:0044444//cytoplasmic part;GO:0005622//intracellular;GO:0044464//cell part;GO:0043226//organelle;GO:0005794//Golgi apparatus;GO:0005623//cell;GO:0005768//endosome;GO:0043231//intracellular membrane-bounded organelle;GO:0005737//cytoplasm;G…	GO:0003674//molecular_function;GO:0003824//catalytic activity;GO:0016740//transferase activity	GO:0008150//biological_process;GO:0008152//metabolic process
Bra005448	25	60.6667	1.84	4.30667	1.22687	0.00140153	0.0184252	yes	-	-	-	-
Bra005485	9	51.6667	0.923333	5.43	2.55603	8.75602e-06	0.000238444	yes	AT2G33560 (E=2e-163) | spindle checkpoint protein-related	-	-	GO:0044238//primary metabolic process;GO:0071840//cellular component organization or biogenesis;GO:0008152//metabolic process;GO:0044763//single-organism cellular process;GO:0016043//cellular component organization;GO:0044699//single-organism process;GO:0071704//organic substance metabolic process;GO:0009056//catabolic process;GO:0043170//macromolecule metabolic process;GO:0007049//cell cycle;GO:…
Bra005498	21	0	3.2	0.001	-11.6439	8.72427e-07	2.984e-05	yes	-	-	-	-
Bra005509	15	0	2.09	0.001	-11.0293	5.93587e-09	3.06345e-07	yes	AT1G30300 (E=4e-035) | unknown protein	-	GO:0003824//catalytic activity;GO:0003674//molecular_function;GO:0016787//hydrolase activity	-
Bra005521	27.6667	0	1.25	0.001	-10.2877	8.81314e-13	7.62993e-11	yes	AT1G04700 (E=6e-160) | protein kinase family protein	-	GO:0003674//molecular_function;GO:1901363//heterocyclic compound binding;GO:1901265//nucleoside phosphate binding;GO:0016740//transferase activity;GO:0005488//binding;GO:0036094//small molecule binding;GO:0000166//nucleotide binding;GO:0005515//protein binding;GO:0003824//catalytic activity;GO:0016301//kinase activity;GO:0016772//transferase activity, transferring phosphorus-containing groups;GO:…	GO:0009987//cellular process;GO:0043412//macromolecule modification;GO:0036211//protein modification process;GO:0019538//protein metabolic process;GO:0008150//biological_process;GO:0044267//cellular protein metabolic process;GO:0008152//metabolic process;GO:0044238//primary metabolic process;GO:0044237//cellular metabolic process;GO:0044260//cellular macromolecule metabolic process;GO:0071704//or…
Bra005522	1656.42	3855.73	139.937	308.59	1.14092	2.75087e-07	1.02783e-05	yes	AT2G33150 (E=2e-228) PKT3, PED1, KAT2 | PKT3 (PEROXISOMAL 3-KETOACYL-COA THIOLASE 3); acetyl-CoA C-acyltransferase	-	GO:0003824//catalytic activity;GO:0016740//transferase activity;GO:0003674//molecular_function	GO:0008152//metabolic process;GO:0008150//biological_process
Bra005526	8.66667	46.3333	1.21333	5.97667	2.30037	1.34412e-05	0.000347968	yes	AT1G43670 (E=1e-089) | fructose-1,6-bisphosphatase, putative / D-fructose-1,6-bisphosphate 1-phosphohydrolase, putative / FBPase, putative	-	GO:0003674//molecular_function;GO:0016787//hydrolase activity;GO:0003824//catalytic activity	GO:0008150//biological_process;GO:0005975//carbohydrate metabolic process;GO:0071704//organic substance metabolic process;GO:0008152//metabolic process;GO:0044238//primary metabolic process
Bra005527	721	207.667	34.7633	10.14	-1.77751	1.41294e-06	4.58251e-05	yes	AT2G33060 (E=4e-307) AtRLP27 | AtRLP27 (Receptor Like Protein 27); kinase/ protein binding	-	GO:0005488//binding;GO:0005515//protein binding;GO:0003674//molecular_function	-
Bra005530	0	5.66667	0.001	0.266667	8.05889	0.00021787	0.00386242	yes	AT2G33050 (E=0.0) AtRLP26 | AtRLP26 (Receptor Like Protein 26); kinase/ protein binding	-	GO:0005515//protein binding;GO:0003674//molecular_function;GO:0005488//binding	-
Bra005535	1.66667	35.6667	0.11	2.21	4.32847	2.1549e-10	1.40205e-08	yes	-	-	-	-
Bra005538	2.66667	50.3333	0.546667	10.4767	4.26037	1.47678e-13	1.41249e-11	yes	-	-	-	-
Bra005539	289	73	17.16	4.39667	-1.96457	2.08174e-08	9.7943e-07	yes	-	-	-	-
Bra005552	0.333333	38.3333	0.0233333	2.62667	6.8147	2.42513e-13	2.25869e-11	yes	AT2G32850 (E=5e-177) | protein kinase family protein	-	GO:0016772//transferase activity, transferring phosphorus-containing groups;GO:1901363//heterocyclic compound binding;GO:0016740//transferase activity;GO:0003674//molecular_function;GO:0016301//kinase activity;GO:0005488//binding;GO:0000166//nucleotide binding;GO:0003824//catalytic activity;GO:0097159//organic cyclic compound binding;GO:1901265//nucleoside phosphate binding;GO:0036094//small mole…	GO:0071704//organic substance metabolic process;GO:0008152//metabolic process;GO:0006464//cellular protein modification process;GO:0044238//primary metabolic process;GO:0008150//biological_process;GO:0043412//macromolecule modification;GO:0043170//macromolecule metabolic process;GO:0044260//cellular macromolecule metabolic process;GO:0019538//protein metabolic process;GO:0044237//cellular metabol…
Bra005582	0	4.33333	0.001	0.646667	9.33688	0.00169729	0.0214994	yes	AT2G32300 (E=6e-076) UCC1 | UCC1 (UCLACYANIN 1); copper ion binding / electron carrier	-	GO:0003674//molecular_function;GO:0005488//binding	-
Bra005584	81.6667	37	9.85667	4.37333	-1.17237	0.00279303	0.0324043	yes	-	-	-	-
Bra005610	398.667	177.333	27.7067	11.4	-1.2812	1.35003e-05	0.000349216	yes	AT2G32120 (E=7e-258) HSP70T-2 | HSP70T-2 (HEAT-SHOCK PROTEIN 70T-2); ATP binding	-	GO:1901265//nucleoside phosphate binding;GO:0097159//organic cyclic compound binding;GO:0036094//small molecule binding;GO:0000166//nucleotide binding;GO:0003674//molecular_function;GO:0005488//binding;GO:1901363//heterocyclic compound binding	GO:0050896//response to stimulus;GO:0009987//cellular process;GO:0009628//response to abiotic stimulus;GO:0006950//response to stress;GO:0008150//biological_process
Bra005622	51	0.666667	7.32333	0.11	-6.05693	1.46761e-15	1.69871e-13	yes	AT2G31960 (E=2e-048) ATGSL03, GSL03, ATGSL3 | ATGSL03 (GLUCAN SYNTHASE-LIKE 3); 1,3-beta-glucan synthase/ transferase, transferring glycosyl groups	-	GO:0003674//molecular_function;GO:0003824//catalytic activity;GO:0016740//transferase activity	-
Bra005638	113.667	365.667	3.84	12.1567	1.66257	3.49385e-10	2.20037e-08	yes	AT2G31830 (E=0.0) | endonuclease/exonuclease/phosphatase family protein	-	GO:0003674//molecular_function;GO:0005198//structural molecule activity;GO:0005515//protein binding;GO:0005488//binding	GO:0008152//metabolic process;GO:0044238//primary metabolic process;GO:0044710//single-organism metabolic process;GO:0009987//cellular process;GO:0044699//single-organism process;GO:0008150//biological_process;GO:0071704//organic substance metabolic process;GO:0006629//lipid metabolic process
Bra005640	84.6667	179	7.41333	15.3167	1.04691	0.00024607	0.00428624	yes	AT2G31810 (E=7e-138) | acetolactate synthase small subunit, putative	-	GO:0003674//molecular_function;GO:0016740//transferase activity;GO:0003824//catalytic activity;GO:0005488//binding	GO:0009987//cellular process;GO:0009058//biosynthetic process;GO:0008150//biological_process;GO:0008152//metabolic process
Bra005642	12.3333	1.33333	0.933333	0.103333	-3.17509	4.47382e-05	0.000998131	yes	AT2G31760 (E=1e-176) | zinc finger protein-related	-	GO:0003824//catalytic activity;GO:0005515//protein binding;GO:0016740//transferase activity;GO:0005488//binding;GO:0003676//nucleic acid binding;GO:0097159//organic cyclic compound binding;GO:1901363//heterocyclic compound binding;GO:0003674//molecular_function	GO:0043170//macromolecule metabolic process;GO:0008152//metabolic process;GO:0044237//cellular metabolic process;GO:0019538//protein metabolic process;GO:0043412//macromolecule modification;GO:0044267//cellular protein metabolic process;GO:0006464//cellular protein modification process;GO:0036211//protein modification process;GO:0008150//biological_process;GO:0044260//cellular macromolecule metab…
Bra005662	86.6667	225.667	5.31	13.68	1.36528	1.65457e-06	5.24372e-05	yes	AT5G01930 (E=8e-237) | (1-4)-beta-mannan endohydrolase, putative	-	GO:0008135//translation factor activity, RNA binding;GO:0003674//molecular_function;GO:0097159//organic cyclic compound binding;GO:1901363//heterocyclic compound binding;GO:0003676//nucleic acid binding;GO:0005488//binding;GO:0003824//catalytic activity;GO:0003723//RNA binding;GO:0016787//hydrolase activity	GO:0032502//developmental process;GO:0005975//carbohydrate metabolic process;GO:0044237//cellular metabolic process;GO:0044707//single-multicellular organism process;GO:0071704//organic substance metabolic process;GO:0010467//gene expression;GO:0044699//single-organism process;GO:0043170//macromolecule metabolic process;GO:1901576//organic substance biosynthetic process;GO:0009059//macromolecule …
Bra005725	7.66667	24.6667	0.746667	2.32333	1.63766	0.000812517	0.0118039	yes	AT5G02460 (E=3e-107) | Dof-type zinc finger domain-containing protein	-	GO:0005488//binding;GO:0097159//organic cyclic compound binding;GO:0003676//nucleic acid binding;GO:1901363//heterocyclic compound binding;GO:0003674//molecular_function;GO:0003677//DNA binding	GO:0009987//cellular process;GO:0044237//cellular metabolic process;GO:0044238//primary metabolic process;GO:0046483//heterocycle metabolic process;GO:0008152//metabolic process;GO:0006139//nucleobase-containing compound metabolic process;GO:0034641//cellular nitrogen compound metabolic process;GO:0006807//nitrogen compound metabolic process;GO:0006725//cellular aromatic compound metabolic proces…
Bra005819	344.333	835	23.0467	53.6433	1.21884	3.94991e-08	1.77725e-06	yes	AT5G04770 (E=4e-275) ATCAT6, CAT6 | CAT6 (CATIONIC AMINO ACID TRANSPORTER 6); amino acid transmembrane transporter/ basic amino acid transmembrane transporter/ cationic amino acid transmembrane transporter	GO:0044464//cell part;GO:0005886//plasma membrane;GO:0016020//membrane;GO:0005623//cell;GO:0005575//cellular_component;GO:0071944//cell periphery	GO:0005215//transporter activity;GO:0003674//molecular_function	GO:0008150//biological_process;GO:0051179//localization;GO:0006810//transport;GO:0009987//cellular process;GO:0051234//establishment of localization
Bra005826	14.6667	2	1.57667	0.23	-2.77717	0.000280008	0.00479118	yes	AT5G04890 (E=4e-080) RTM2 | RTM2 (RESTRICTED TEV MOVEMENT 2)	GO:0044464//cell part;GO:0005575//cellular_component;GO:0016020//membrane;GO:0071944//cell periphery;GO:0005623//cell;GO:0005886//plasma membrane	-	GO:0009987//cellular process;GO:0008150//biological_process;GO:0051234//establishment of localization;GO:0050896//response to stimulus;GO:0009607//response to biotic stimulus;GO:0006810//transport;GO:0051179//localization;GO:0009605//response to external stimulus
Bra005901	98	248.667	10.2633	25.9333	1.33731	6.47481e-06	0.000181283	yes	-	-	-	-
Bra005910	20.3333	77	3.14	11.5467	1.87864	6.82838e-05	0.00143324	yes	-	-	-	-
Bra005928	1198	452	62.06	23.3967	-1.40736	0.000922395	0.0131138	yes	AT5G07210 (E=1e-175) ARR21 | ARR21 (ARABIDOPSIS RESPONSE REGULATOR 21); transcription factor/ two-component response regulator	-	GO:0003677//DNA binding;GO:0097159//organic cyclic compound binding;GO:0003674//molecular_function;GO:0003682//chromatin binding;GO:0044877//macromolecular complex binding;GO:0005488//binding;GO:0004871//signal transducer activity;GO:0003676//nucleic acid binding;GO:1901363//heterocyclic compound binding	GO:0006725//cellular aromatic compound metabolic process;GO:0044238//primary metabolic process;GO:0044763//single-organism cellular process;GO:0034641//cellular nitrogen compound metabolic process;GO:0008152//metabolic process;GO:0007154//cell communication;GO:0023052//signaling;GO:0009987//cellular process;GO:0044699//single-organism process;GO:0065007//biological regulation;GO:0071704//organic …
Bra005936	0	9	0.001	1.17667	10.2005	6.959e-05	0.0014597	yes	AT5G07460 (E=2e-105) PMSR2, ATMSRA2 | PMSR2 (PEPTIDEMETHIONINE SULFOXIDE REDUCTASE 2); oxidoreductase, acting on sulfur group of donors, disulfide as acceptor / peptide-methionine-(S)-S-oxide reductase	-	GO:0003824//catalytic activity;GO:0003674//molecular_function	GO:0044238//primary metabolic process;GO:0050896//response to stimulus;GO:0071704//organic substance metabolic process;GO:0008150//biological_process;GO:0019538//protein metabolic process;GO:0043170//macromolecule metabolic process;GO:0008152//metabolic process;GO:0006950//response to stress;GO:0009987//cellular process
Bra005947	22.6667	5.66667	2.06667	0.526667	-1.97234	0.00177553	0.0223512	yes	AT5G07610 (E=1e-141) | F-box family protein	-	GO:0003674//molecular_function;GO:0005488//binding;GO:0005515//protein binding	-
Bra006011	5	0.333333	0.423333	0.03	-3.81876	0.00274288	0.0319329	yes	AT5G02910 (E=5e-087) | F-box family protein	-	GO:0005515//protein binding;GO:0003674//molecular_function;GO:0005488//binding	-
Bra006016	6.66667	76.3333	0.543333	5.98	3.46024	3.86566e-11	2.75653e-09	yes	AT5G09220 (E=2e-245) AAP2 | AAP2 (AMINO ACID PERMEASE 2); amino acid transmembrane transporter	GO:0016020//membrane;GO:0005575//cellular_component	-	-
Bra006018	4.39	0	1.22	0.001	-10.2527	0.002106	0.025669	yes	-	-	-	-
Bra006059	138.333	36.3333	11.13	2.79333	-1.99439	1.70532e-09	9.54084e-08	yes	AT5G44050 (E=7e-233) | MATE efflux family protein	GO:0016020//membrane;GO:0005575//cellular_component	GO:0003674//molecular_function;GO:0005215//transporter activity	GO:0051179//localization;GO:0051234//establishment of localization;GO:0008150//biological_process;GO:0006810//transport;GO:0009987//cellular process
Bra006097	23	67.6667	1.32	3.87667	1.55428	0.000191432	0.00347668	yes	AT5G11470 (E=2e-079) | DNA binding / nucleic acid binding	-	GO:0005488//binding;GO:0003677//DNA binding;GO:0044877//macromolecular complex binding;GO:0097159//organic cyclic compound binding;GO:0003682//chromatin binding;GO:0000166//nucleotide binding;GO:1901363//heterocyclic compound binding;GO:0003676//nucleic acid binding;GO:1901265//nucleoside phosphate binding;GO:0036094//small molecule binding;GO:0003674//molecular_function	-
Bra006107	1260.29	2951.08	82.9567	189.98	1.19542	9.95303e-08	4.06598e-06	yes	AT5G11670 (E=0.0) ATNADP-ME2 | ATNADP-ME2 (NADP-malic enzyme 2); malate dehydrogenase (oxaloacetate-decarboxylating) (NADP+)/ malic enzyme/ oxidoreductase, acting on NADH or NADPH, NAD or NADP as acceptor	-	GO:0097159//organic cyclic compound binding;GO:0003674//molecular_function;GO:1901363//heterocyclic compound binding;GO:0003824//catalytic activity;GO:0036094//small molecule binding;GO:0000166//nucleotide binding;GO:1901265//nucleoside phosphate binding;GO:0005488//binding	GO:0008152//metabolic process;GO:0009987//cellular process;GO:0008150//biological_process
Bra006126	33.6667	151	6.71	28.9433	2.10885	1.86615e-10	1.22164e-08	yes	AT5G11900 (E=1e-104) | eukaryotic translation initiation factor SUI1 family protein	GO:0005737//cytoplasm;GO:0044424//intracellular part;GO:0043226//organelle;GO:0043229//intracellular organelle;GO:0030529//intracellular ribonucleoprotein complex;GO:0005840//ribosome;GO:1990904//ribonucleoprotein complex;GO:0005575//cellular_component;GO:0043228//non-membrane-bounded organelle;GO:0043232//intracellular non-membrane-bounded organelle;GO:0032991//macromolecular complex;GO:0044444/…	GO:1901363//heterocyclic compound binding;GO:0008135//translation factor activity, RNA binding;GO:0003674//molecular_function;GO:0003676//nucleic acid binding;GO:0003723//RNA binding;GO:0097159//organic cyclic compound binding;GO:0005488//binding	GO:0044237//cellular metabolic process;GO:0044249//cellular biosynthetic process;GO:0044238//primary metabolic process;GO:0034641//cellular nitrogen compound metabolic process;GO:0044260//cellular macromolecule metabolic process;GO:0044271//cellular nitrogen compound biosynthetic process;GO:0019538//protein metabolic process;GO:0009058//biosynthetic process;GO:0006412//translation;GO:1901564//org…
Bra006127	503.333	96	66.6067	12.4833	-2.41566	1.37063e-20	2.60631e-18	yes	-	-	-	-
Bra006137	133.333	40.6667	36.8867	9.95667	-1.88936	5.53114e-05	0.0011931	yes	-	-	-	-
Bra006140	0.666667	10.6667	0.0366667	0.59	4.00817	3.066e-05	0.000720195	yes	AT5G12080 (E=3e-222) MSL10 | MSL10 (MECHANOSENSITIVE CHANNEL OF SMALL CONDUCTANCE-LIKE 10); mechanically-gated ion channel	GO:0016020//membrane;GO:0005575//cellular_component	-	GO:0051179//localization;GO:0006810//transport;GO:0051234//establishment of localization;GO:0009987//cellular process;GO:0008150//biological_process
Bra006146	842.333	0.333333	28.5933	0.0133333	-11.0664	8.13259e-55	1.08252e-51	yes	AT5G11250 (E=6e-206) | disease resistance protein (TIR-NBS-LRR class), putative	-	GO:0000166//nucleotide binding;GO:0005515//protein binding;GO:0036094//small molecule binding;GO:0003824//catalytic activity;GO:0005488//binding;GO:0097159//organic cyclic compound binding;GO:1901363//heterocyclic compound binding;GO:0003674//molecular_function;GO:0016787//hydrolase activity;GO:1901265//nucleoside phosphate binding	GO:0050896//response to stimulus;GO:0051716//cellular response to stimulus;GO:0008150//biological_process;GO:0007154//cell communication;GO:0023052//signaling;GO:0050794//regulation of cellular process;GO:0044699//single-organism process;GO:0007165//signal transduction;GO:0006950//response to stress;GO:0065007//biological regulation;GO:0044763//single-organism cellular process;GO:0044700//single …
Bra006148	164.333	30.3333	28.6033	5.46667	-2.38745	8.71295e-05	0.00177628	yes	-	-	-	-
Bra006151	24.6667	5.33333	1.60333	0.333333	-2.26604	0.000133471	0.00255169	yes	-	-	-	-
Bra006153	26.3467	4.33333	2.85667	0.396667	-2.84833	2.1486e-05	0.000524766	yes	AT4G22050 (E=6e-084) | aspartyl protease family protein	-	GO:0003674//molecular_function;GO:0016787//hydrolase activity;GO:0003824//catalytic activity	GO:0019538//protein metabolic process;GO:0008152//metabolic process;GO:0008150//biological_process;GO:0071704//organic substance metabolic process;GO:0043170//macromolecule metabolic process;GO:0044238//primary metabolic process
Bra006155	657.317	29.3333	85.8967	3.38333	-4.66608	5.24491e-31	1.92591e-28	yes	AT4G22050 (E=4e-080) | aspartyl protease family protein	-	GO:0016787//hydrolase activity;GO:0003824//catalytic activity;GO:0003674//molecular_function	GO:0008152//metabolic process;GO:0044238//primary metabolic process;GO:0019538//protein metabolic process;GO:0071704//organic substance metabolic process;GO:0043170//macromolecule metabolic process;GO:0008150//biological_process
Bra006182	232	85.3333	35.1533	12.7867	-1.45902	2.0702e-07	7.91084e-06	yes	AT5G13120 (E=1e-118) | peptidyl-prolyl cis-trans isomerase cyclophilin-type family protein	GO:0043227//membrane-bounded organelle;GO:0044464//cell part;GO:0043229//intracellular organelle;GO:0005623//cell;GO:0009536//plastid;GO:0043226//organelle;GO:0009579//thylakoid;GO:0005622//intracellular;GO:0005575//cellular_component;GO:0044444//cytoplasmic part;GO:0016020//membrane;GO:0044424//intracellular part;GO:0043231//intracellular membrane-bounded organelle;GO:0005737//cytoplasm	GO:0003824//catalytic activity;GO:0005488//binding;GO:0005515//protein binding;GO:0003674//molecular_function	GO:0044238//primary metabolic process;GO:0044260//cellular macromolecule metabolic process;GO:0044237//cellular metabolic process;GO:0036211//protein modification process;GO:0009987//cellular process;GO:0071704//organic substance metabolic process;GO:0043412//macromolecule modification;GO:0008152//metabolic process;GO:0043170//macromolecule metabolic process;GO:0006464//cellular protein modificat…
Bra006184	22	6	1.94	0.45	-2.10806	0.00259212	0.0304105	yes	AT5G13160 (E=5e-197) PBS1 | PBS1 (avrPphB susceptible 1); kinase/ protein serine/threonine kinase	-	GO:0000166//nucleotide binding;GO:0003824//catalytic activity;GO:0003674//molecular_function;GO:0016772//transferase activity, transferring phosphorus-containing groups;GO:0036094//small molecule binding;GO:0005488//binding;GO:0016740//transferase activity;GO:0097159//organic cyclic compound binding;GO:1901265//nucleoside phosphate binding;GO:0016301//kinase activity;GO:1901363//heterocyclic comp…	GO:0044238//primary metabolic process;GO:0008150//biological_process;GO:0009987//cellular process;GO:0019538//protein metabolic process;GO:0008152//metabolic process;GO:0044267//cellular protein metabolic process;GO:0044237//cellular metabolic process;GO:0043412//macromolecule modification;GO:0006464//cellular protein modification process;GO:0036211//protein modification process;GO:0043170//macro…
Bra006185	0.666667	14	0.0866667	1.69	4.2854	9.53357e-07	3.21944e-05	yes	AT5G13170 (E=8e-116) SAG29 | SAG29 (SENESCENCE-ASSOCIATED PROTEIN 29)	GO:0044464//cell part;GO:0005623//cell;GO:0005575//cellular_component;GO:0005886//plasma membrane;GO:0016020//membrane;GO:0071944//cell periphery	-	GO:0051234//establishment of localization;GO:0006810//transport;GO:0051179//localization;GO:0008150//biological_process
Bra006197	610.333	119	54.5233	10.5767	-2.36599	1.51668e-20	2.85012e-18	yes	AT5G13420 (E=5e-198) | transaldolase, putative	GO:0005622//intracellular;GO:0005623//cell;GO:0044464//cell part;GO:0005737//cytoplasm;GO:0005575//cellular_component;GO:0044424//intracellular part	GO:0003824//catalytic activity;GO:0016740//transferase activity;GO:0003674//molecular_function	GO:0006807//nitrogen compound metabolic process;GO:0006725//cellular aromatic compound metabolic process;GO:0005975//carbohydrate metabolic process;GO:0006139//nucleobase-containing compound metabolic process;GO:0008152//metabolic process;GO:0044237//cellular metabolic process;GO:0034641//cellular nitrogen compound metabolic process;GO:0044238//primary metabolic process;GO:1901360//organic cyclic…
Bra006200	622.333	267.667	99.5	41.2633	-1.26984	1.11825e-08	5.53853e-07	yes	AT5G13450 (E=8e-107) | ATP synthase delta chain, mitochondrial, putative / H(+)-transporting two-sector ATPase, delta (OSCP) subunit, putative	-	GO:0005215//transporter activity;GO:0003674//molecular_function;GO:0003824//catalytic activity;GO:0016787//hydrolase activity	GO:0046483//heterocycle metabolic process;GO:0006139//nucleobase-containing compound metabolic process;GO:0006807//nitrogen compound metabolic process;GO:0008152//metabolic process;GO:0009987//cellular process;GO:0044237//cellular metabolic process;GO:1901360//organic cyclic compound metabolic process;GO:0006725//cellular aromatic compound metabolic process;GO:0051234//establishment of localizati…
Bra006205	1052.67	261	25.6633	6.15333	-2.06027	6.53023e-20	1.16545e-17	yes	AT5G13530 (E=0.0) KEG | KEG (KEEP ON GOING); protein binding / protein kinase/ ubiquitin-protein ligase	GO:0005575//cellular_component;GO:0044424//intracellular part;GO:0043229//intracellular organelle;GO:0044464//cell part;GO:0005623//cell;GO:0005622//intracellular;GO:0044444//cytoplasmic part;GO:0005794//Golgi apparatus;GO:0005737//cytoplasm;GO:0043226//organelle;GO:0012505//endomembrane system;GO:0043227//membrane-bounded organelle;GO:0043231//intracellular membrane-bounded organelle	GO:1901265//nucleoside phosphate binding;GO:0036094//small molecule binding;GO:0016301//kinase activity;GO:0003824//catalytic activity;GO:0016740//transferase activity;GO:0097159//organic cyclic compound binding;GO:1901363//heterocyclic compound binding;GO:0016772//transferase activity, transferring phosphorus-containing groups;GO:0003674//molecular_function;GO:0005515//protein binding;GO:0000166…	GO:1901360//organic cyclic compound metabolic process;GO:0008150//biological_process;GO:0009056//catabolic process;GO:0006464//cellular protein modification process;GO:0007154//cell communication;GO:0006725//cellular aromatic compound metabolic process;GO:0050794//regulation of cellular process;GO:0009987//cellular process;GO:0044700//single organism signaling;GO:0006950//response to stress;GO:00…
Bra006224	419.667	2	41.9	0.186667	-7.81034	6.46003e-52	6.65716e-49	yes	AT5G13930 (E=2e-216) CHS, TT4, ATCHS | TT4 (TRANSPARENT TESTA 4); naringenin-chalcone synthase	-	GO:0003824//catalytic activity;GO:0003674//molecular_function;GO:0016740//transferase activity	GO:0008152//metabolic process;GO:0008150//biological_process;GO:0009058//biosynthetic process
Bra006244	33	88.6667	1.69	4.3	1.34731	0.00392122	0.042695	yes	AT5G14230 (E=0.0) | protein binding	-	GO:0003674//molecular_function;GO:0005488//binding;GO:0005515//protein binding	-
Bra006245	42	6	6.55	0.906667	-2.85285	3.61271e-06	0.000106174	yes	-	-	-	-
Bra006247	113.667	239.333	10.2933	20.7767	1.01325	0.000226193	0.00399445	yes	AT5G14310 (E=5e-191) AtCXE16 | AtCXE16 (Arabidopsis thaliana carboxyesterase 16); hydrolase	-	GO:0003674//molecular_function;GO:0016787//hydrolase activity;GO:0003824//catalytic activity	GO:0008150//biological_process;GO:0008152//metabolic process
Bra006256	17	84	1.66667	8.2	2.29866	1.60798e-07	6.31062e-06	yes	AT5G14480 (E=8e-218) | glycosyl transferase family 17 protein	GO:0005575//cellular_component;GO:0016020//membrane	GO:0003824//catalytic activity;GO:0016740//transferase activity;GO:0003674//molecular_function	GO:0044237//cellular metabolic process;GO:0044267//cellular protein metabolic process;GO:0009987//cellular process;GO:0044238//primary metabolic process;GO:0008150//biological_process;GO:0019538//protein metabolic process;GO:0043412//macromolecule modification;GO:0043170//macromolecule metabolic process;GO:0009058//biosynthetic process;GO:0008152//metabolic process;GO:0005975//carbohydrate metabo…
Bra006262	469.333	126	38.36	10.1567	-1.91718	3.07459e-11	2.21218e-09	yes	AT5G14590 (E=3e-250) | isocitrate dehydrogenase, putative / NADP+ isocitrate dehydrogenase, putative	GO:0005737//cytoplasm;GO:0005575//cellular_component;GO:0044444//cytoplasmic part;GO:0005739//mitochondrion;GO:0044464//cell part;GO:0043229//intracellular organelle;GO:0043226//organelle;GO:0043227//membrane-bounded organelle;GO:0005623//cell;GO:0044424//intracellular part;GO:0005622//intracellular;GO:0009579//thylakoid;GO:0043231//intracellular membrane-bounded organelle;GO:0009536//plastid	GO:1901363//heterocyclic compound binding;GO:0097159//organic cyclic compound binding;GO:0000166//nucleotide binding;GO:0036094//small molecule binding;GO:0003674//molecular_function;GO:1901265//nucleoside phosphate binding;GO:0005488//binding;GO:0003824//catalytic activity	GO:0008150//biological_process;GO:0008152//metabolic process;GO:0044237//cellular metabolic process;GO:0006091//generation of precursor metabolites and energy;GO:0009987//cellular process
Bra006263	778.023	160.88	74.7833	15.1733	-2.30118	1.47493e-17	2.07569e-15	yes	AT5G14640 (E=2e-234) ATSK13, SK13 | SK13 (SHAGGY-LIKE KINASE 13); ATP binding / protein kinase/ protein serine/threonine kinase	GO:0005829//cytosol;GO:0005623//cell;GO:0005575//cellular_component;GO:0005737//cytoplasm;GO:0044424//intracellular part;GO:0044444//cytoplasmic part;GO:0044464//cell part;GO:0005622//intracellular	GO:0003674//molecular_function;GO:0016772//transferase activity, transferring phosphorus-containing groups;GO:0036094//small molecule binding;GO:0000166//nucleotide binding;GO:1901265//nucleoside phosphate binding;GO:0016740//transferase activity;GO:1901363//heterocyclic compound binding;GO:0097159//organic cyclic compound binding;GO:0016301//kinase activity;GO:0005488//binding;GO:0003824//cataly…	GO:0019538//protein metabolic process;GO:0044238//primary metabolic process;GO:0071704//organic substance metabolic process;GO:0008150//biological_process;GO:0043170//macromolecule metabolic process;GO:0044260//cellular macromolecule metabolic process;GO:0006464//cellular protein modification process;GO:0044267//cellular protein metabolic process;GO:0008152//metabolic process;GO:0043412//macromol…
Bra006266	1.5	84.3333	0.373333	20.58	5.78463	6.93347e-21	1.35887e-18	yes	-	-	-	-
Bra006268	1.5	84.3333	0.373333	20.58	5.78463	6.90316e-21	1.35887e-18	yes	-	-	-	-
Bra006272	24	57.3333	5.08	11.75	1.20976	0.00410144	0.0441458	yes	AT5G14910 (E=1e-072) | heavy-metal-associated domain-containing protein	-	GO:0003674//molecular_function;GO:0005488//binding	GO:0006810//transport;GO:0051179//localization;GO:0051234//establishment of localization;GO:0008150//biological_process
Bra006287	133.333	42.3333	8.56333	2.71667	-1.65633	2.86126e-06	8.59077e-05	yes	AT5G15170 (E=0.0) | tyrosyl-DNA phosphodiesterase-related	GO:0005575//cellular_component;GO:0044424//intracellular part;GO:0043226//organelle;GO:0005623//cell;GO:0043231//intracellular membrane-bounded organelle;GO:0043227//membrane-bounded organelle;GO:0005634//nucleus;GO:0044464//cell part;GO:0043229//intracellular organelle;GO:0005622//intracellular	GO:0003824//catalytic activity;GO:0005515//protein binding;GO:0016787//hydrolase activity;GO:0005488//binding;GO:0003674//molecular_function	GO:0006259//DNA metabolic process;GO:0034641//cellular nitrogen compound metabolic process;GO:0044767//single-organism developmental process;GO:1901360//organic cyclic compound metabolic process;GO:0007275//multicellular organism development;GO:0044699//single-organism process;GO:0044237//cellular metabolic process;GO:0009791//post-embryonic development;GO:0006950//response to stress;GO:0006807//…
Bra006288	5.33333	0	1.79	0.001	-10.8057	0.000355174	0.00584263	yes	-	-	-	-
Bra006290	77.6667	11	19.7267	2.64	-2.90154	2.59711e-10	1.67611e-08	yes	AT5G15220 (E=5e-072) | ribosomal protein L27 family protein	GO:0044444//cytoplasmic part;GO:1990904//ribonucleoprotein complex;GO:0005575//cellular_component;GO:0005737//cytoplasm;GO:0005840//ribosome;GO:0044424//intracellular part;GO:0043229//intracellular organelle;GO:0005623//cell;GO:0043226//organelle;GO:0030529//intracellular ribonucleoprotein complex;GO:0032991//macromolecular complex;GO:0005622//intracellular;GO:0044464//cell part;GO:0043232//intra…	GO:0005198//structural molecule activity;GO:0003674//molecular_function	GO:0008152//metabolic process;GO:0008150//biological_process;GO:0043604//amide biosynthetic process;GO:0043603//cellular amide metabolic process;GO:0044271//cellular nitrogen compound biosynthetic process;GO:0044260//cellular macromolecule metabolic process;GO:0044267//cellular protein metabolic process;GO:0006412//translation;GO:0009059//macromolecule biosynthetic process;GO:0043043//peptide bio…
Bra006300	17.6667	4	5.83	1.34	-2.12126	0.00113596	0.0154884	yes	AT5G15460 (E=9e-046) MUB2 | MUB2 (MEMBRANE-ANCHORED UBIQUITIN-FOLD PROTEIN 2)	-	GO:0005488//binding;GO:0005515//protein binding;GO:0003674//molecular_function	GO:0071704//organic substance metabolic process;GO:0051234//establishment of localization;GO:0009987//cellular process;GO:0009058//biosynthetic process;GO:0006810//transport;GO:0051179//localization;GO:0008152//metabolic process;GO:0044238//primary metabolic process;GO:0008150//biological_process;GO:0005975//carbohydrate metabolic process
Bra006301	144.667	67.3333	10.59	4.74667	-1.15772	0.000164723	0.00305945	yes	AT5G15470 (E=3e-279) GAUT14 | GAUT14 (Galacturonosyltransferase 14); polygalacturonate 4-alpha-galacturonosyltransferase/ transferase, transferring glycosyl groups / transferase, transferring hexosyl groups	GO:0043226//organelle;GO:0005794//Golgi apparatus;GO:0043229//intracellular organelle;GO:0016020//membrane;GO:0005622//intracellular;GO:0044444//cytoplasmic part;GO:0005623//cell;GO:0005737//cytoplasm;GO:0044464//cell part;GO:0044424//intracellular part;GO:0043231//intracellular membrane-bounded organelle;GO:0043227//membrane-bounded organelle;GO:0012505//endomembrane system;GO:0005575//cellular_…	GO:0003674//molecular_function;GO:0003824//catalytic activity;GO:0016740//transferase activity	GO:0009058//biosynthetic process;GO:0044238//primary metabolic process;GO:0071840//cellular component organization or biogenesis;GO:0005975//carbohydrate metabolic process;GO:0071704//organic substance metabolic process;GO:0008152//metabolic process;GO:0008150//biological_process;GO:0016043//cellular component organization;GO:0009987//cellular process
Bra006314	49.6667	20.3333	6.05333	2.32	-1.3836	0.0010988	0.0150736	yes	AT5G15640 (E=1e-163) | mitochondrial substrate carrier family protein	GO:0016020//membrane;GO:0005575//cellular_component	-	GO:0051179//localization;GO:0009987//cellular process;GO:0008150//biological_process;GO:0051234//establishment of localization;GO:0006810//transport
Bra006328	46.31	208.12	3.04333	14.17	2.21912	3.42221e-05	0.00079107	yes	AT5G14640 (E=5e-185) ATSK13, SK13 | SK13 (SHAGGY-LIKE KINASE 13); ATP binding / protein kinase/ protein serine/threonine kinase	-	GO:1901363//heterocyclic compound binding;GO:0003824//catalytic activity;GO:0000166//nucleotide binding;GO:0005488//binding;GO:0016301//kinase activity;GO:0036094//small molecule binding;GO:1901265//nucleoside phosphate binding;GO:0097159//organic cyclic compound binding;GO:0003674//molecular_function;GO:0016772//transferase activity, transferring phosphorus-containing groups;GO:0016740//transfer…	GO:0006464//cellular protein modification process;GO:0019538//protein metabolic process;GO:0071704//organic substance metabolic process;GO:0044267//cellular protein metabolic process;GO:0044260//cellular macromolecule metabolic process;GO:0043170//macromolecule metabolic process;GO:0043412//macromolecule modification;GO:0044238//primary metabolic process;GO:0009987//cellular process;GO:0008150//b…
Bra006340	355.247	766.667	71.67	150.9	1.07415	8.44053e-05	0.00172515	yes	AT5G16130 (E=4e-100) | 40S ribosomal protein S7 (RPS7C)	GO:0005737//cytoplasm;GO:0044464//cell part;GO:0043228//non-membrane-bounded organelle;GO:0005622//intracellular;GO:0043232//intracellular non-membrane-bounded organelle;GO:0044444//cytoplasmic part;GO:0032991//macromolecular complex;GO:0044424//intracellular part;GO:0005575//cellular_component;GO:0043226//organelle;GO:0043229//intracellular organelle;GO:0005623//cell;GO:0030529//intracellular ri…	GO:0003674//molecular_function;GO:0005198//structural molecule activity	GO:0043603//cellular amide metabolic process;GO:0044260//cellular macromolecule metabolic process;GO:0008152//metabolic process;GO:0010467//gene expression;GO:0044237//cellular metabolic process;GO:0034641//cellular nitrogen compound metabolic process;GO:0043043//peptide biosynthetic process;GO:0008150//biological_process;GO:0034645//cellular macromolecule biosynthetic process;GO:0043170//macromo…
Bra006351	143.333	6.33333	30.61	1.21667	-4.653	1.78813e-20	3.34057e-18	yes	-	-	-	-
Bra006352	140.333	0	17.8733	0.001	-14.1255	1.54578e-31	5.94958e-29	yes	AT5G16390 (E=6e-088) CAC1, CAC1A, BCCP, BCCP1 | CAC1 (CHLOROPLASTIC ACETYLCOENZYME A CARBOXYLASE 1); acetyl-CoA carboxylase/ biotin binding	GO:0044464//cell part;GO:0005622//intracellular;GO:0044424//intracellular part;GO:0005575//cellular_component;GO:0005623//cell;GO:0005737//cytoplasm	GO:0003674//molecular_function;GO:0003824//catalytic activity	GO:0044238//primary metabolic process;GO:0008150//biological_process;GO:0044710//single-organism metabolic process;GO:0071704//organic substance metabolic process;GO:0044699//single-organism process;GO:0009058//biosynthetic process;GO:0009987//cellular process;GO:0006629//lipid metabolic process;GO:0008152//metabolic process
Bra006367	731.333	46.6667	36.7933	2.34667	-3.97076	1.14718e-20	2.19448e-18	yes	-	-	-	-
Bra006369	24	0.333333	2.38	0.0266667	-6.47978	2.09235e-09	1.15844e-07	yes	AT5G05780 (E=3e-045) RPN8A, AE3, ATHMOV34 | RPN8A (RP NON-ATPASE SUBUNIT 8A)	-	GO:0005488//binding;GO:1901363//heterocyclic compound binding;GO:0005515//protein binding;GO:0036094//small molecule binding;GO:0003674//molecular_function;GO:0000166//nucleotide binding;GO:0097159//organic cyclic compound binding;GO:1901265//nucleoside phosphate binding	-
Bra006375	69.6667	174.333	4.36	10.6833	1.29296	0.000170794	0.00315145	yes	AT2G20790 (E=9e-280) | protein binding	GO:0005575//cellular_component;GO:0005622//intracellular;GO:0044424//intracellular part;GO:0005623//cell;GO:0044464//cell part;GO:0005737//cytoplasm;GO:0016020//membrane	-	GO:0008150//biological_process;GO:0051234//establishment of localization;GO:0006810//transport;GO:0051179//localization
Bra006380	37	11	13.9533	4.05333	-1.78343	0.000203342	0.00365148	yes	-	-	-	-
Bra006381	45	21	4.08333	1.83333	-1.15528	0.00349531	0.0387578	yes	AT5G16990 (E=2e-167) | NADP-dependent oxidoreductase, putative	-	GO:0003824//catalytic activity;GO:0003674//molecular_function;GO:0005488//binding	GO:0008152//metabolic process;GO:0008150//biological_process
Bra006386	390.667	30.3333	68.2967	4.90333	-3.79998	1.53725e-21	3.25224e-19	yes	-	-	-	-
Bra006387	37.0533	0	6.51667	0.001	-12.6699	1.04482e-13	1.03018e-11	yes	-	-	-	-
Bra006388	9.94667	0	1.75667	0.001	-10.7786	7.71373e-06	0.000212068	yes	-	-	-	-
Bra006389	57.6667	6	6.76	0.663333	-3.34922	1.71367e-08	8.17089e-07	yes	-	-	-	-
Bra006390	102	27.3333	6.93333	1.89667	-1.87008	1.16594e-05	0.000308081	yes	-	-	-	-
Bra006397	164	400.333	12.5033	30.7033	1.29608	2.64278e-05	0.000632879	yes	AT5G17330 (E=1e-274) GAD, GAD1 | GAD; calmodulin binding / glutamate decarboxylase	-	GO:0005488//binding;GO:0003674//molecular_function;GO:0003824//catalytic activity	GO:0008152//metabolic process;GO:0009987//cellular process;GO:0008150//biological_process
Bra006398	437	129	139.977	38.0033	-1.88099	4.74882e-09	2.48698e-07	yes	-	-	-	-
Bra006400	49	251.667	14.9033	73.9833	2.31157	0.00275544	0.0320441	yes	-	-	-	-
Bra006424	25	57.6667	6.15	14.45	1.23241	0.00434761	0.0461577	yes	AT5G17840 (E=2e-067) | chaperone protein dnaJ-related	-	GO:0005488//binding;GO:0005515//protein binding;GO:0003674//molecular_function	-
Bra006427	177.33	0.333333	16.4333	0.0233333	-9.46002	2.02564e-30	7.27092e-28	yes	AT5G17900 (E=9e-119) | FUNCTIONS IN: molecular_function unknown; INVOLVED IN: biological_process unknown; LOCATED IN: extracellular region; CONTAINS InterPro DOMAIN/s: Micro-fibrillar-associated 1, C-terminal (InterPro:IPR009730); BEST Arabidopsis thaliana protein match is: unknown protein (TAIR:AT4G08580.1); Has 36643 Blast hits to 21191 proteins in 1090 species: Archae - 183; Bacteria - 2726; M…	GO:0005575//cellular_component;GO:0044421//extracellular region part;GO:0005576//extracellular region;GO:0031012//extracellular matrix;GO:0005578//proteinaceous extracellular matrix	-	-
Bra006441	252.333	84.3333	38.0967	11.7267	-1.69987	9.22864e-05	0.00187186	yes	-	-	-	-
Bra006461	8.66667	42	0.84	3.93	2.22607	3.06508e-06	9.15112e-05	yes	-	-	-	-
Bra006543	75	201.667	11.5733	30.0833	1.37816	5.57698e-05	0.00120136	yes	AT5G20150 (E=5e-103) ATSPX1, SPX1 | SPX1 (SPX DOMAIN GENE 1)	-	-	GO:0007154//cell communication;GO:0044763//single-organism cellular process;GO:0009991//response to extracellular stimulus;GO:0044699//single-organism process;GO:0009605//response to external stimulus;GO:0009987//cellular process;GO:0008150//biological_process;GO:0006950//response to stress;GO:0050896//response to stimulus
Bra006587	617.667	49.6667	36.6767	3.00667	-3.60863	0.000127675	0.00245853	yes	AT5G20940 (E=6e-226) | glycosyl hydrolase family 3 protein	-	GO:0003674//molecular_function;GO:0016787//hydrolase activity;GO:0003824//catalytic activity	GO:0005975//carbohydrate metabolic process;GO:0071704//organic substance metabolic process;GO:0044238//primary metabolic process;GO:0008152//metabolic process;GO:0008150//biological_process
Bra006652	24.6667	1.33333	7.11333	0.336667	-4.40113	8.42692e-09	4.25959e-07	yes	-	-	-	-
Bra006664	8.17333	24.63	1.16667	3.29667	1.49862	0.0030602	0.034778	yes	AT3G01280 (E=5e-137) VDAC1, ATVDAC1 | VDAC1 (VOLTAGE DEPENDENT ANION CHANNEL 1); voltage-gated anion channel	GO:0005737//cytoplasm;GO:0005622//intracellular;GO:0044444//cytoplasmic part;GO:0043231//intracellular membrane-bounded organelle;GO:0043229//intracellular organelle;GO:0016020//membrane;GO:0043226//organelle;GO:0005575//cellular_component;GO:0044424//intracellular part;GO:0005739//mitochondrion;GO:0044464//cell part;GO:0043227//membrane-bounded organelle;GO:0005623//cell	GO:0003674//molecular_function;GO:0005215//transporter activity	GO:0006810//transport;GO:0008150//biological_process;GO:0051234//establishment of localization;GO:0051179//localization;GO:0009987//cellular process
Bra006716	192.333	86.6667	26.8633	11.8433	-1.18156	0.000344547	0.00569715	yes	AT5G59480 (E=1e-144) | haloacid dehalogenase-like hydrolase family protein	-	GO:0003824//catalytic activity;GO:0003674//molecular_function;GO:0016787//hydrolase activity	GO:0008152//metabolic process;GO:0008150//biological_process
Bra006721	4.33333	17	1.46333	5.51667	1.91454	0.00124434	0.0166953	yes	AT5G59320 (E=7e-054) LTP3 | LTP3 (LIPID TRANSFER PROTEIN 3); lipid binding	GO:0030312//external encapsulating structure;GO:0005576//extracellular region;GO:0044464//cell part;GO:0005623//cell;GO:0005618//cell wall;GO:0071944//cell periphery;GO:0005575//cellular_component	GO:0003674//molecular_function;GO:0008289//lipid binding;GO:0005488//binding	GO:0050896//response to stimulus;GO:0006810//transport;GO:0051179//localization;GO:0008150//biological_process;GO:0006950//response to stress;GO:0051234//establishment of localization;GO:0009628//response to abiotic stimulus
Bra006743	1.33333	7.66667	0.1	0.553333	2.46815	0.00468569	0.0488701	yes	AT5G58860 (E=2e-282) CYP86A1, CYP86 | CYP86A1 (CYTOCHROME P450 86 A1); fatty acid (omega-1)-hydroxylase/ oxygen binding	GO:0043231//intracellular membrane-bounded organelle;GO:0043229//intracellular organelle;GO:0005623//cell;GO:0005773//vacuole;GO:0005575//cellular_component;GO:0005622//intracellular;GO:0043227//membrane-bounded organelle;GO:0044424//intracellular part;GO:0005737//cytoplasm;GO:0044464//cell part;GO:0044444//cytoplasmic part;GO:0043226//organelle	GO:0003674//molecular_function;GO:0005488//binding;GO:0003824//catalytic activity	GO:0008152//metabolic process;GO:0006810//transport;GO:0044699//single-organism process;GO:0051234//establishment of localization;GO:0009987//cellular process;GO:0009058//biosynthetic process;GO:0071704//organic substance metabolic process;GO:0019748//secondary metabolic process;GO:0044238//primary metabolic process;GO:0008150//biological_process;GO:0006629//lipid metabolic process;GO:0044710//si…
Bra006809	42.6667	7	4.29333	0.723333	-2.56937	1.77777e-05	0.000442655	yes	AT5G57630 (E=8e-138) CIPK21, SnRK3.4 | CIPK21 (CBL-interacting protein kinase 21); ATP binding / kinase/ protein kinase/ protein serine/threonine kinase	-	GO:0036094//small molecule binding;GO:0005488//binding;GO:0016772//transferase activity, transferring phosphorus-containing groups;GO:1901265//nucleoside phosphate binding;GO:0003674//molecular_function;GO:1901363//heterocyclic compound binding;GO:0000166//nucleotide binding;GO:0016740//transferase activity;GO:0097159//organic cyclic compound binding;GO:0003824//catalytic activity;GO:0016301//kin…	GO:0036211//protein modification process;GO:0065007//biological regulation;GO:0044260//cellular macromolecule metabolic process;GO:0006464//cellular protein modification process;GO:0043170//macromolecule metabolic process;GO:0008152//metabolic process;GO:0050794//regulation of cellular process;GO:0044238//primary metabolic process;GO:0043412//macromolecule modification;GO:0019538//protein metabol…
Bra006891	35	14.6667	15.0467	6.23333	-1.27137	0.00440106	0.0466273	yes	-	-	-	-
Bra006905	63.6133	15.5267	22.54	5.55	-2.02193	1.14834e-05	0.000303934	yes	AT3G52180 (E=3e-040) ATPTPKIS1, DSP4, SEX4 | SEX4 (STARCH-EXCESS 4); polysaccharide binding / protein tyrosine/serine/threonine phosphatase	-	GO:0016787//hydrolase activity;GO:0003824//catalytic activity;GO:0003674//molecular_function	GO:0071704//organic substance metabolic process;GO:0005975//carbohydrate metabolic process;GO:0044238//primary metabolic process;GO:0008152//metabolic process;GO:0008150//biological_process;GO:0009987//cellular process
Bra006908	2029.05	935.473	225.05	102.457	-1.13523	2.27212e-07	8.65138e-06	yes	AT3G52180 (E=8e-142) ATPTPKIS1, DSP4, SEX4 | SEX4 (STARCH-EXCESS 4); polysaccharide binding / protein tyrosine/serine/threonine phosphatase	-	GO:0003674//molecular_function;GO:0003824//catalytic activity;GO:0016787//hydrolase activity	GO:0006464//cellular protein modification process;GO:0009987//cellular process;GO:0044237//cellular metabolic process;GO:0044238//primary metabolic process;GO:0043412//macromolecule modification;GO:0043170//macromolecule metabolic process;GO:0019538//protein metabolic process;GO:0008150//biological_process;GO:0005975//carbohydrate metabolic process;GO:0044267//cellular protein metabolic process;G…
Bra006927	6.33333	26.6667	1.18	4.83667	2.03523	0.000216869	0.00384894	yes	-	-	-	-
Bra006951	2	55	0.176667	4.36667	4.62743	2.31146e-10	1.49785e-08	yes	AT3G52820 (E=3e-228) ATPAP22, PAP22 | PAP22 (PURPLE ACID PHOSPHATASE 22); acid phosphatase/ protein serine/threonine phosphatase	-	GO:0016787//hydrolase activity;GO:0003824//catalytic activity;GO:0005488//binding;GO:0003674//molecular_function	GO:0006725//cellular aromatic compound metabolic process;GO:0050896//response to stimulus;GO:0009058//biosynthetic process;GO:0034641//cellular nitrogen compound metabolic process;GO:0044710//single-organism metabolic process;GO:0006950//response to stress;GO:0009991//response to extracellular stimulus;GO:0008152//metabolic process;GO:0008150//biological_process;GO:0006807//nitrogen compound meta…
Bra006992	6.66667	23.6667	0.706667	2.47	1.80541	0.000357911	0.00587857	yes	AT3G53350 (E=1e-123) | myosin heavy chain-related	GO:0005634//nucleus;GO:0043232//intracellular non-membrane-bounded organelle;GO:0005575//cellular_component;GO:0043228//non-membrane-bounded organelle;GO:0005622//intracellular;GO:0043227//membrane-bounded organelle;GO:0043226//organelle;GO:0043231//intracellular membrane-bounded organelle;GO:0005623//cell;GO:0043229//intracellular organelle;GO:0044464//cell part;GO:0005856//cytoskeleton;GO:00444…	-	GO:0009987//cellular process;GO:0071840//cellular component organization or biogenesis;GO:0016043//cellular component organization;GO:0008150//biological_process
Bra007070	2797.67	1016.67	254.957	89.8367	-1.50488	1.85426e-09	1.03199e-07	yes	AT3G54400 (E=2e-204) | aspartyl protease family protein	-	GO:0016787//hydrolase activity;GO:0003674//molecular_function;GO:0003824//catalytic activity	GO:0008152//metabolic process;GO:0071704//organic substance metabolic process;GO:0008150//biological_process;GO:0043170//macromolecule metabolic process;GO:0044238//primary metabolic process;GO:0019538//protein metabolic process
Bra007100	8	31.6667	1.09333	4.12667	1.91624	6.53694e-05	0.00138206	yes	AT3G54820 (E=2e-148) PIP2D, PIP2;5 | PIP2;5 (PLASMA MEMBRANE INTRINSIC PROTEIN 2;5); water channel	GO:0016020//membrane;GO:0005575//cellular_component	GO:0003674//molecular_function;GO:0005215//transporter activity	GO:0006810//transport;GO:0051234//establishment of localization;GO:0051179//localization;GO:0008150//biological_process
Bra007142	146	38.3333	22.6967	5.95	-1.93152	1.29897e-08	6.35534e-07	yes	AT3G55120 (E=2e-107) TT5, A11, CFI | TT5 (TRANSPARENT TESTA 5); chalcone isomerase	-	GO:0003824//catalytic activity;GO:0003674//molecular_function	GO:0008150//biological_process;GO:0009058//biosynthetic process;GO:0008152//metabolic process
Bra007145	67	2	8.70333	0.253333	-5.10246	2.48647e-17	3.39457e-15	yes	AT3G55120 (E=1e-043) TT5, A11, CFI | TT5 (TRANSPARENT TESTA 5); chalcone isomerase	-	GO:0003674//molecular_function;GO:0003824//catalytic activity	GO:0008152//metabolic process;GO:0009058//biosynthetic process;GO:0008150//biological_process
Bra007155	48.3333	117.667	10.44	24.66	1.24005	0.000175158	0.00321955	yes	-	-	-	-
Bra007177	303	101.667	25.3633	8.05333	-1.65509	3.85581e-05	0.000873186	yes	-	-	-	-
Bra007232	5	17	0.963333	3.08333	1.67838	0.00307755	0.0349255	yes	-	-	-	-
Bra007252	90.6667	39	7.16	3.03667	-1.23747	0.00100283	0.0140089	yes	AT3G56570 (E=1e-188) | SET domain-containing protein	-	GO:0003674//molecular_function;GO:0003824//catalytic activity;GO:0005488//binding;GO:0005515//protein binding;GO:0016740//transferase activity	GO:0019538//protein metabolic process;GO:0008152//metabolic process;GO:0044260//cellular macromolecule metabolic process;GO:0044238//primary metabolic process;GO:0036211//protein modification process;GO:0009987//cellular process;GO:0008150//biological_process;GO:0043412//macromolecule modification;GO:0071704//organic substance metabolic process;GO:0006464//cellular protein modification process;GO…
Bra007293	558.07	142	59.5467	14.9967	-1.98938	8.06732e-13	7.04149e-11	yes	AT3G57020 (E=6e-178) | strictosidine synthase family protein	-	GO:0003674//molecular_function;GO:0003824//catalytic activity	GO:0009058//biosynthetic process;GO:0008150//biological_process;GO:0008152//metabolic process
Bra007354	0	546	0.001	49.17	15.5855	2.25875e-77	5.55061e-74	yes	-	-	-	-
Bra007375	97.3333	43.6667	7.88333	3.39	-1.21752	0.000255145	0.00441063	yes	-	-	-	-
Bra007378	32.6667	84.6667	5.07	12.4667	1.29802	0.000368128	0.00602162	yes	AT3G58070 (E=4e-090) GIS | GIS (GLABROUS INFLORESCENCE STEMS); nucleic acid binding / transcription factor/ zinc ion binding	-	GO:0003674//molecular_function;GO:0005488//binding	-
Bra007405	127.333	35.6667	7.43333	2	-1.89401	2.12541e-08	9.98504e-07	yes	AT3G58620 (E=1e-279) TTL4 | TTL4 (Tetratricopetide-repeat Thioredoxin-Like 4); binding	-	GO:0003674//molecular_function;GO:0005515//protein binding;GO:0005488//binding	GO:0044238//primary metabolic process;GO:0044763//single-organism cellular process;GO:0006629//lipid metabolic process;GO:0065007//biological regulation;GO:0006950//response to stress;GO:0008150//biological_process;GO:0009628//response to abiotic stimulus;GO:0019725//cellular homeostasis;GO:0009058//biosynthetic process;GO:0042592//homeostatic process;GO:0044710//single-organism metabolic process…
Bra007416	9.33333	0	0.816667	0.001	-9.6736	1.52499e-06	4.89129e-05	yes	AT3G58750 (E=2e-133) CSY2 | CSY2 (citrate synthase 2); citrate (SI)-synthase	-	GO:0016740//transferase activity;GO:0003674//molecular_function;GO:0003824//catalytic activity	GO:0008152//metabolic process;GO:0009987//cellular process;GO:0006091//generation of precursor metabolites and energy;GO:0044237//cellular metabolic process;GO:0008150//biological_process;GO:0071704//organic substance metabolic process;GO:0005975//carbohydrate metabolic process;GO:0044238//primary metabolic process
Bra007458	57.6667	120.333	2.99	5.99333	1.00321	0.00177473	0.0223512	yes	AT2G43410 (E=3e-192) FPA | FPA; RNA binding	-	GO:1901265//nucleoside phosphate binding;GO:0005488//binding;GO:0003676//nucleic acid binding;GO:0003674//molecular_function;GO:0097159//organic cyclic compound binding;GO:1901363//heterocyclic compound binding;GO:0036094//small molecule binding;GO:0000166//nucleotide binding	-
Bra007475	956.667	260.333	96.7033	25.83	-1.90452	2.55844e-08	1.18969e-06	yes	AT2G43790 (E=9e-129) ATMPK6, MPK6, MAPK6 | ATMPK6 (ARABIDOPSIS THALIANA MAP KINASE 6); MAP kinase/ kinase	-	GO:0036094//small molecule binding;GO:0003824//catalytic activity;GO:0016740//transferase activity;GO:0000166//nucleotide binding;GO:0016301//kinase activity;GO:1901363//heterocyclic compound binding;GO:0003674//molecular_function;GO:0005488//binding;GO:0016772//transferase activity, transferring phosphorus-containing groups;GO:0097159//organic cyclic compound binding;GO:1901265//nucleoside phosp…	GO:0009987//cellular process;GO:0044238//primary metabolic process;GO:0044237//cellular metabolic process;GO:0071704//organic substance metabolic process;GO:0006464//cellular protein modification process;GO:0044260//cellular macromolecule metabolic process;GO:0036211//protein modification process;GO:0008152//metabolic process;GO:0043170//macromolecule metabolic process;GO:0043412//macromolecule m…
Bra007476	19.6667	4.66667	1.91667	0.39	-2.29705	0.00100487	0.0140305	yes	AT2G43790 (E=3e-128) ATMPK6, MPK6, MAPK6 | ATMPK6 (ARABIDOPSIS THALIANA MAP KINASE 6); MAP kinase/ kinase	-	GO:0016301//kinase activity;GO:0000166//nucleotide binding;GO:1901363//heterocyclic compound binding;GO:0003674//molecular_function;GO:0036094//small molecule binding;GO:0097159//organic cyclic compound binding;GO:0016772//transferase activity, transferring phosphorus-containing groups;GO:0016740//transferase activity;GO:0003824//catalytic activity;GO:1901265//nucleoside phosphate binding;GO:0005…	GO:0019538//protein metabolic process;GO:0044238//primary metabolic process;GO:0008152//metabolic process;GO:0043412//macromolecule modification;GO:0044267//cellular protein metabolic process;GO:0043170//macromolecule metabolic process;GO:0044237//cellular metabolic process;GO:0009987//cellular process;GO:0044260//cellular macromolecule metabolic process;GO:0006464//cellular protein modification …
Bra007486	0	3.66667	0.001	0.85	9.73132	0.00470176	0.0489698	yes	AT4G34470 (E=2e-025) ASK12 | ASK12 (ARABIDOPSIS SKP1-LIKE 12); protein binding / ubiquitin-protein ligase	-	-	GO:0008152//metabolic process;GO:0071704//organic substance metabolic process;GO:0043170//macromolecule metabolic process;GO:0009056//catabolic process;GO:0044238//primary metabolic process;GO:0019538//protein metabolic process;GO:0009987//cellular process;GO:0008150//biological_process
Bra007493	60.3333	23.3333	5.32	1.95	-1.44795	0.000233179	0.0040862	yes	AT3G59920 (E=1e-239) ATGDI2 | ATGDI2 (RAB GDP DISSOCIATION INHIBITOR 2); RAB GDP-dissociation inhibitor	-	GO:0003674//molecular_function;GO:0003824//catalytic activity;GO:0098772//molecular function regulator;GO:0030234//enzyme regulator activity	GO:0051716//cellular response to stimulus;GO:0044699//single-organism process;GO:0044700//single organism signaling;GO:0044763//single-organism cellular process;GO:0051179//localization;GO:0007165//signal transduction;GO:0009987//cellular process;GO:0050896//response to stimulus;GO:0065007//biological regulation;GO:0008152//metabolic process;GO:0050789//regulation of biological process;GO:0023052…
Bra007503	19.3333	5.66667	1.44667	0.413333	-1.80735	0.000966627	0.0136155	yes	AT3G49130 (E=6e-014) | RNA binding	-	GO:0097159//organic cyclic compound binding;GO:0003676//nucleic acid binding;GO:0003674//molecular_function;GO:1901363//heterocyclic compound binding;GO:0005488//binding;GO:0003723//RNA binding	GO:0044237//cellular metabolic process;GO:1901360//organic cyclic compound metabolic process;GO:0008150//biological_process;GO:0008152//metabolic process;GO:0006725//cellular aromatic compound metabolic process;GO:0046483//heterocycle metabolic process;GO:0009987//cellular process;GO:0044238//primary metabolic process;GO:0071704//organic substance metabolic process;GO:0006807//nitrogen compound m…
Bra007504	235.333	559.333	31.88	70.9733	1.15463	1.08011e-05	0.000287782	yes	AT3G60080 (E=1e-083) | zinc finger (C3HC4-type RING finger) family protein	-	GO:0005488//binding;GO:0003674//molecular_function;GO:0005515//protein binding	-
Bra007508	26.6667	82	2.01	6.09333	1.60004	9.3419e-06	0.000251845	yes	AT3G60130 (E=5e-266) BGLU16 | BGLU16 (BETA GLUCOSIDASE 16); catalytic/ cation binding / hydrolase, hydrolyzing O-glycosyl compounds	-	GO:0003824//catalytic activity;GO:0016787//hydrolase activity;GO:0003674//molecular_function	GO:0071704//organic substance metabolic process;GO:0044238//primary metabolic process;GO:0005975//carbohydrate metabolic process;GO:0008152//metabolic process;GO:0008150//biological_process
Bra007513	120.667	32.6667	7.49667	2.08	-1.84967	1.56476e-05	0.000397675	yes	AT3G60190 (E=0.0) ADL4, ADLP2, EDR3, DRP1E, ADL1E | ADL1E (ARABIDOPSIS DYNAMIN-LIKE 1E); GTP binding / GTPase	-	GO:0016787//hydrolase activity;GO:0005488//binding;GO:1901363//heterocyclic compound binding;GO:0003824//catalytic activity;GO:0097159//organic cyclic compound binding;GO:0000166//nucleotide binding;GO:0036094//small molecule binding;GO:0003674//molecular_function;GO:1901265//nucleoside phosphate binding	-
Bra007526	23.3333	1.66667	3.39667	0.22	-3.94854	5.93403e-08	2.57916e-06	yes	AT3G61090 (E=8e-029) | unknown protein	GO:0005737//cytoplasm;GO:0005623//cell;GO:0043227//membrane-bounded organelle;GO:0005622//intracellular;GO:0043229//intracellular organelle;GO:0042579//microbody;GO:0043226//organelle;GO:0044424//intracellular part;GO:0005575//cellular_component;GO:0044464//cell part;GO:0043231//intracellular membrane-bounded organelle;GO:0044444//cytoplasmic part;GO:0005777//peroxisome	-	GO:0008152//metabolic process;GO:0008150//biological_process
Bra007541	107.667	7.66667	32.07	2.37667	-3.75421	3.06883e-16	3.79988e-14	yes	-	-	-	-
Bra007544	2.33333	13.6667	0.4	2.34	2.54844	0.0011535	0.0157008	yes	AT3G60550 (E=3e-115) CYCP3;2 | CYCP3;2 (cyclin p3;2); cyclin-dependent protein kinase	-	GO:0005515//protein binding;GO:0003674//molecular_function;GO:0005488//binding	GO:0071704//organic substance metabolic process;GO:0044763//single-organism cellular process;GO:0044699//single-organism process;GO:0008150//biological_process;GO:0044260//cellular macromolecule metabolic process;GO:0006464//cellular protein modification process;GO:0043412//macromolecule modification;GO:0007049//cell cycle;GO:0044237//cellular metabolic process;GO:0043170//macromolecule metabolic…
Bra007558	17.6667	4	1.44333	0.296667	-2.28249	0.0008593	0.0123487	yes	AT3G60790 (E=1e-100) | F-box protein-related	-	GO:0003674//molecular_function;GO:0005515//protein binding;GO:0005488//binding	-
Bra007589	71.3333	13	14.3033	2.64667	-2.4341	2.09594e-07	7.99961e-06	yes	AT3G61260 (E=2e-057) | DNA-binding family protein / remorin family protein	GO:0005886//plasma membrane;GO:0043231//intracellular membrane-bounded organelle;GO:0043227//membrane-bounded organelle;GO:0071944//cell periphery;GO:0044444//cytoplasmic part;GO:0044464//cell part;GO:0005737//cytoplasm;GO:0005622//intracellular;GO:0016020//membrane;GO:0043226//organelle;GO:0005773//vacuole;GO:0005623//cell;GO:0043229//intracellular organelle;GO:0005575//cellular_component;GO:004…	-	-
Bra007600	11.6667	1	1.01333	0.0866667	-3.54749	0.000460642	0.00729943	yes	AT3G61390 (E=1e-163) | U-box domain-containing protein	GO:0005622//intracellular;GO:0044464//cell part;GO:0005575//cellular_component;GO:0005623//cell	GO:0016740//transferase activity;GO:0003674//molecular_function;GO:0003824//catalytic activity	GO:0044237//cellular metabolic process;GO:0008152//metabolic process;GO:0044267//cellular protein metabolic process;GO:0044238//primary metabolic process;GO:0009987//cellular process;GO:0006464//cellular protein modification process;GO:0008150//biological_process;GO:0019538//protein metabolic process;GO:0043170//macromolecule metabolic process;GO:0044260//cellular macromolecule metabolic process;…
Bra007603	0	16	0.001	2.11	11.043	2.51793e-09	1.37736e-07	yes	AT3G61430 (E=1e-162) PIP1A, ATPIP1, PIP1, PIP1;1 | PIP1A (PLASMA MEMBRANE INTRINSIC PROTEIN 1A); water channel	GO:0016020//membrane;GO:0005575//cellular_component	GO:0005215//transporter activity;GO:0003674//molecular_function	GO:0051234//establishment of localization;GO:0006810//transport;GO:0051179//localization;GO:0008150//biological_process
Bra007604	104.333	413.333	11.1367	42.9467	1.94723	4.79195e-13	4.31221e-11	yes	AT3G61440 (E=2e-181) ATCYSC1, ARATH;BSAS3;1, CYSC1 | CYSC1 (CYSTEINE SYNTHASE C1); L-3-cyanoalanine synthase/ cysteine synthase	GO:0005575//cellular_component;GO:0044464//cell part;GO:0044444//cytoplasmic part;GO:0043227//membrane-bounded organelle;GO:0044424//intracellular part;GO:0043229//intracellular organelle;GO:0005622//intracellular;GO:0005737//cytoplasm;GO:0043231//intracellular membrane-bounded organelle;GO:0043226//organelle;GO:0005739//mitochondrion;GO:0005623//cell	GO:0016740//transferase activity;GO:0003824//catalytic activity;GO:0003674//molecular_function	GO:0008150//biological_process;GO:0009058//biosynthetic process;GO:0008152//metabolic process;GO:0009987//cellular process
Bra007616	75.3333	161.333	7.37667	14.9267	1.01685	0.00205156	0.0251397	yes	AT3G61590 (E=6e-184) HWS, HS | HWS (HAWAIIAN SKIRT); ubiquitin-protein ligase	GO:0005622//intracellular;GO:0044464//cell part;GO:0005623//cell;GO:0005575//cellular_component	GO:0005488//binding;GO:0003674//molecular_function;GO:0005515//protein binding	GO:0044699//single-organism process;GO:0008152//metabolic process;GO:0050896//response to stimulus;GO:0044238//primary metabolic process;GO:0043170//macromolecule metabolic process;GO:0044763//single-organism cellular process;GO:0019538//protein metabolic process;GO:0006950//response to stress;GO:0008150//biological_process;GO:0071704//organic substance metabolic process;GO:0007049//cell cycle;GO…
Bra007630	41	111.667	4.40333	11.54	1.38998	2.81895e-05	0.000667562	yes	AT3G61750 (E=8e-108) | auxin-responsive protein -related	GO:0016020//membrane;GO:0005575//cellular_component	-	-
Bra007644	182.667	67.6667	25.5367	9.61	-1.40996	0.00133898	0.0177416	yes	AT2G46810 (E=2e-070) | basic helix-loop-helix (bHLH) family protein	-	GO:0003700//transcription factor activity, sequence-specific DNA binding;GO:0005515//protein binding;GO:0001071//nucleic acid binding transcription factor activity;GO:0003674//molecular_function;GO:0005488//binding	GO:0046483//heterocycle metabolic process;GO:0008152//metabolic process;GO:0008150//biological_process;GO:0071704//organic substance metabolic process;GO:0044238//primary metabolic process;GO:0006725//cellular aromatic compound metabolic process;GO:1901360//organic cyclic compound metabolic process;GO:0006807//nitrogen compound metabolic process;GO:0034641//cellular nitrogen compound metabolic pr…
Bra007647	10.3333	38.6667	3.41667	11.9733	1.80916	0.000117692	0.00229395	yes	AT3G61980 (E=1e-038) | serine protease inhibitor, Kazal-type family protein	GO:0005623//cell;GO:0005886//plasma membrane;GO:0005575//cellular_component;GO:0016020//membrane;GO:0044464//cell part;GO:0071944//cell periphery	-	GO:0050896//response to stimulus;GO:0009719//response to endogenous stimulus;GO:0008150//biological_process
Bra007652	161.333	415	28.2233	68.5533	1.28034	0.000111662	0.00219382	yes	AT3G62020 (E=6e-117) GLP10 | GLP10 (GERMIN-LIKE PROTEIN 10); manganese ion binding / nutrient reservoir	GO:0005623//cell;GO:0044464//cell part;GO:0005618//cell wall;GO:0071944//cell periphery;GO:0030312//external encapsulating structure;GO:0005576//extracellular region;GO:0005575//cellular_component	GO:0003674//molecular_function;GO:0005488//binding	GO:0071704//organic substance metabolic process;GO:0008150//biological_process;GO:0044238//primary metabolic process;GO:0009987//cellular process;GO:0008152//metabolic process;GO:0009058//biosynthetic process;GO:0005975//carbohydrate metabolic process
Bra007656	1.66667	41.6667	0.276667	6.99667	4.66045	1.66221e-09	9.32749e-08	yes	AT3G62040 (E=3e-110) | catalytic/ hydrolase	-	GO:0003674//molecular_function;GO:0003824//catalytic activity;GO:0016787//hydrolase activity	GO:0051234//establishment of localization;GO:0006810//transport;GO:0051179//localization;GO:0008150//biological_process;GO:0008152//metabolic process
Bra007657	50.6667	173	4.83	16.0267	1.73038	2.75805e-07	1.02931e-05	yes	AT3G62060 (E=1e-200) | pectinacetylesterase family protein	-	GO:0016787//hydrolase activity;GO:0003674//molecular_function;GO:0003824//catalytic activity	-
Bra007680	73.6667	36.3333	7.17667	3.49333	-1.03871	0.00432589	0.0459971	yes	AT5G03970 (E=1e-089) | F-box family protein	-	GO:0005515//protein binding;GO:0005488//binding;GO:0003674//molecular_function	-
Bra007697	125	428.333	15.5533	51.6267	1.73089	4.58882e-09	2.41109e-07	yes	-	-	-	-
Bra007712	15	1.33333	1.39	0.126667	-3.45598	4.34858e-06	0.000124928	yes	AT3G62910 (E=3e-195) APG3 | APG3 (ALBINO AND PALE GREEN); translation release factor/ translation release factor, codon specific	GO:0044464//cell part;GO:0005575//cellular_component;GO:0005737//cytoplasm;GO:0044424//intracellular part;GO:0005622//intracellular;GO:0005623//cell	GO:0008135//translation factor activity, RNA binding;GO:0097159//organic cyclic compound binding;GO:0003676//nucleic acid binding;GO:0003723//RNA binding;GO:1901363//heterocyclic compound binding;GO:0003674//molecular_function;GO:0005488//binding	GO:1901566//organonitrogen compound biosynthetic process;GO:0043604//amide biosynthetic process;GO:0010467//gene expression;GO:0009987//cellular process;GO:0044249//cellular biosynthetic process;GO:0043043//peptide biosynthetic process;GO:0009058//biosynthetic process;GO:0071704//organic substance metabolic process;GO:1901564//organonitrogen compound metabolic process;GO:0016043//cellular compone…
Bra007725	29.3333	64	2.98667	6.31333	1.07987	0.0044481	0.0469073	yes	AT1G59560 (E=3e-074) ZCF61 | ZCF61; protein binding / zinc ion binding	-	GO:0003674//molecular_function;GO:0016740//transferase activity;GO:0005488//binding;GO:0003824//catalytic activity;GO:0005515//protein binding	GO:0071840//cellular component organization or biogenesis;GO:0009987//cellular process;GO:0044260//cellular macromolecule metabolic process;GO:0008152//metabolic process;GO:0043170//macromolecule metabolic process;GO:0071704//organic substance metabolic process;GO:0044237//cellular metabolic process;GO:0043412//macromolecule modification;GO:0006464//cellular protein modification process;GO:004423…
Bra007726	58	26.6667	9.02	4.11333	-1.13282	0.00358835	0.0396296	yes	-	-	-	-
Bra007729	4.33333	28.6667	0.753333	4.92333	2.70828	5.44433e-07	1.91758e-05	yes	AT3G63120 (E=1e-089) CYCP1;1 | CYCP1;1 (cyclin p1;1); cyclin-dependent protein kinase	-	GO:0005488//binding;GO:0003674//molecular_function;GO:0005515//protein binding	GO:0009987//cellular process;GO:0009791//post-embryonic development;GO:0008152//metabolic process;GO:0007275//multicellular organism development;GO:0044238//primary metabolic process;GO:0036211//protein modification process;GO:0043170//macromolecule metabolic process;GO:0043412//macromolecule modification;GO:0044237//cellular metabolic process;GO:0071704//organic substance metabolic process;GO:00…
Bra007732	91.6667	12.3333	12.64	1.57333	-3.0061	7.21104e-12	5.60496e-10	yes	AT3G63170 (E=4e-106) | chalcone isomerase	-	GO:0003674//molecular_function;GO:0003824//catalytic activity	-
Bra007775	73	184.667	5.90667	14.2267	1.26818	0.000345292	0.00570357	yes	AT2G25940 (E=1e-237) ALPHA-VPE, ALPHAVPE | ALPHA-VPE (alpha-vacuolar processing enzyme); cysteine-type endopeptidase	-	GO:0016787//hydrolase activity;GO:0003674//molecular_function;GO:0003824//catalytic activity	GO:0071704//organic substance metabolic process;GO:0009987//cellular process;GO:0008150//biological_process;GO:0044238//primary metabolic process;GO:0008152//metabolic process;GO:0043170//macromolecule metabolic process;GO:0019538//protein metabolic process
Bra007780	63.6667	20	8.39	2.68	-1.64644	0.000199606	0.00359853	yes	-	-	-	-
Bra007786	0.666667	7.66667	0.04	0.44	3.45943	0.000925685	0.0131489	yes	AT5G59260 (E=4e-159) | lectin protein kinase, putative	-	GO:0016301//kinase activity;GO:0016772//transferase activity, transferring phosphorus-containing groups;GO:0003674//molecular_function;GO:0005488//binding;GO:0003824//catalytic activity;GO:1901265//nucleoside phosphate binding;GO:0036094//small molecule binding;GO:0000166//nucleotide binding;GO:0030246//carbohydrate binding;GO:0016740//transferase activity;GO:0097159//organic cyclic compound bind…	GO:0044260//cellular macromolecule metabolic process;GO:0008150//biological_process;GO:0019538//protein metabolic process;GO:0036211//protein modification process;GO:0043412//macromolecule modification;GO:0044238//primary metabolic process;GO:0044237//cellular metabolic process;GO:0043170//macromolecule metabolic process;GO:0009987//cellular process;GO:0071704//organic substance metabolic process…
Bra007790	77.6667	40.3333	5.11667	2.55667	-1.00094	0.00431418	0.0458943	yes	-	-	-	-
Bra007801	44	3.66667	3.53333	0.28	-3.65753	4.8852e-11	3.44509e-09	yes	AT2G25360 (E=1e-097) | zinc finger protein-related	-	GO:0005488//binding;GO:0003824//catalytic activity;GO:0016740//transferase activity;GO:0005515//protein binding;GO:0003674//molecular_function	GO:0071704//organic substance metabolic process;GO:0009987//cellular process;GO:0043170//macromolecule metabolic process;GO:0008152//metabolic process;GO:0036211//protein modification process;GO:0044237//cellular metabolic process;GO:0044267//cellular protein metabolic process;GO:0044238//primary metabolic process;GO:0019538//protein metabolic process;GO:0044260//cellular macromolecule metabolic …
Bra007816	1476.67	789.667	59.32	29.56	-1.00487	6.17725e-05	0.00131559	yes	AT2G25140 (E=0.0) HSP98.7, CLPB-M, CLPB4 | CLPB4 (CASEIN LYTIC PROTEINASE B4); ATP binding / ATPase/ nucleoside-triphosphatase/ nucleotide binding / protein binding	GO:0005623//cell;GO:0044464//cell part;GO:0005575//cellular_component;GO:0009536//plastid;GO:0005622//intracellular;GO:0044444//cytoplasmic part;GO:0043227//membrane-bounded organelle;GO:0043226//organelle;GO:0005737//cytoplasm;GO:0043231//intracellular membrane-bounded organelle;GO:0043229//intracellular organelle;GO:0044424//intracellular part;GO:0005739//mitochondrion	GO:0016787//hydrolase activity;GO:0036094//small molecule binding;GO:0003674//molecular_function;GO:0003824//catalytic activity;GO:1901265//nucleoside phosphate binding;GO:0000166//nucleotide binding;GO:0005488//binding;GO:0097159//organic cyclic compound binding;GO:1901363//heterocyclic compound binding	GO:0008150//biological_process;GO:0008152//metabolic process;GO:0009987//cellular process;GO:0071704//organic substance metabolic process;GO:0009628//response to abiotic stimulus;GO:0019538//protein metabolic process;GO:0050896//response to stimulus;GO:0043170//macromolecule metabolic process;GO:0044238//primary metabolic process;GO:0006950//response to stress
Bra007817	95	202.333	8.19333	16.4767	1.0079	0.00186459	0.0232702	yes	AT2G25130 (E=1e-144) | armadillo/beta-catenin repeat family protein	-	GO:0003674//molecular_function;GO:0005515//protein binding;GO:0005488//binding	-
Bra007818	97.6667	42.6667	17.1933	7.61667	-1.17462	0.00476818	0.0495203	yes	AT2G25110 (E=3e-106) SDF2 | SDF2 (STROMAL CELL-DERIVED FACTOR 2-LIKE PROTEIN PRECURSOR)	GO:0016020//membrane;GO:0005575//cellular_component	-	-
Bra007821	61	0.333333	13.3667	0.0766667	-7.44582	1.01451e-21	2.25066e-19	yes	AT2G25060 (E=2e-076) | plastocyanin-like domain-containing protein	GO:0005623//cell;GO:0005886//plasma membrane;GO:0005575//cellular_component;GO:0071944//cell periphery;GO:0044464//cell part;GO:0016020//membrane	GO:0005488//binding;GO:0003674//molecular_function	GO:0044763//single-organism cellular process;GO:0008150//biological_process;GO:0044267//cellular protein metabolic process;GO:0044699//single-organism process;GO:0007049//cell cycle;GO:0071704//organic substance metabolic process;GO:0006464//cellular protein modification process;GO:0019538//protein metabolic process;GO:0044260//cellular macromolecule metabolic process;GO:0009987//cellular process…
Bra007840	111	33.6667	5.09	1.56667	-1.69997	7.45223e-06	0.000205764	yes	AT2G24650 (E=5e-086) | DNA binding / transcription factor	GO:0043229//intracellular organelle;GO:0043231//intracellular membrane-bounded organelle;GO:0005623//cell;GO:0043227//membrane-bounded organelle;GO:0005575//cellular_component;GO:0043226//organelle;GO:0044424//intracellular part;GO:0005634//nucleus;GO:0005622//intracellular;GO:0044464//cell part	GO:1901363//heterocyclic compound binding;GO:0097159//organic cyclic compound binding;GO:0000166//nucleotide binding;GO:0003677//DNA binding;GO:0003676//nucleic acid binding;GO:0003674//molecular_function;GO:0036094//small molecule binding;GO:0005488//binding;GO:1901265//nucleoside phosphate binding	GO:0034641//cellular nitrogen compound metabolic process;GO:0006139//nucleobase-containing compound metabolic process;GO:0006807//nitrogen compound metabolic process;GO:0044237//cellular metabolic process;GO:0008152//metabolic process;GO:0046483//heterocycle metabolic process;GO:0009987//cellular process;GO:0044238//primary metabolic process;GO:0071704//organic substance metabolic process;GO:1901…
Bra007850	9.33333	0.333333	1.91667	0.0766667	-4.64386	1.29477e-05	0.00033683	yes	-	-	-	-
Bra007856	336	153.273	28.5533	12.86	-1.15077	7.22772e-06	0.000200257	yes	-	-	-	-
Bra007857	63	14	3.12667	0.623333	-2.32655	8.08124e-06	0.00022122	yes	AT2G24370 (E=0.0) | ATP binding / kinase/ protein kinase/ protein serine/threonine kinase	-	GO:1901363//heterocyclic compound binding;GO:0003824//catalytic activity;GO:0016301//kinase activity;GO:1901265//nucleoside phosphate binding;GO:0097159//organic cyclic compound binding;GO:0036094//small molecule binding;GO:0003674//molecular_function;GO:0016772//transferase activity, transferring phosphorus-containing groups;GO:0000166//nucleotide binding;GO:0005488//binding;GO:0016740//transfer…	GO:0043412//macromolecule modification;GO:0008150//biological_process;GO:0044238//primary metabolic process;GO:0050896//response to stimulus;GO:0008152//metabolic process;GO:0009987//cellular process;GO:0044237//cellular metabolic process;GO:0006464//cellular protein modification process;GO:0044260//cellular macromolecule metabolic process;GO:0071704//organic substance metabolic process;GO:000695…
Bra007901	40.6667	17	4.68	1.93	-1.27791	0.00246018	0.029195	yes	AT1G70210 (E=3e-146) CYCD1;1 | CYCD1;1 (CYCLIN D1;1); cyclin-dependent protein kinase regulator	GO:0005622//intracellular;GO:0043227//membrane-bounded organelle;GO:0043231//intracellular membrane-bounded organelle;GO:0043229//intracellular organelle;GO:0005634//nucleus;GO:0043226//organelle;GO:0044424//intracellular part;GO:0044464//cell part;GO:0005623//cell;GO:0005575//cellular_component	GO:0003674//molecular_function;GO:0005515//protein binding;GO:0005488//binding	GO:0009791//post-embryonic development;GO:0090304//nucleic acid metabolic process;GO:0044699//single-organism process;GO:0071704//organic substance metabolic process;GO:0044238//primary metabolic process;GO:0006464//cellular protein modification process;GO:0044707//single-multicellular organism process;GO:0006807//nitrogen compound metabolic process;GO:0019538//protein metabolic process;GO:003464…
Bra007924	173.333	913.333	18.2667	90.5167	2.30897	5.16325e-07	1.82866e-05	yes	AT1G70560 (E=7e-192) WEI8, TAA1, SAV3 | TAA1 (TRYPTOPHAN AMINOTRANSFERASE OF ARABIDOPSIS 1); L-alanine:2-oxoglutarate aminotransferase/ L-glutamine:2-oxoglutarate aminotransferase/ L-leucine:2-oxoglutarate aminotransferase/ L-methionine:2-oxoglutarate aminotransferase/ L-phenylalanine:2-oxoglut	-	GO:0003674//molecular_function;GO:0003824//catalytic activity;GO:0005488//binding	GO:0008152//metabolic process;GO:0008150//biological_process
Bra007927	32	2.33333	8.35333	0.633333	-3.72132	7.57716e-10	4.51604e-08	yes	-	-	-	-
Bra007991	3.33333	15	0.253333	1.11667	2.14009	0.000538224	0.00833856	yes	AT1G71880 (E=2e-219) SUC1, ATSUC1 | SUC1 (Sucrose-proton symporter 1); carbohydrate transmembrane transporter/ sucrose:hydrogen symporter/ sugar:hydrogen symporter	GO:0044464//cell part;GO:0016020//membrane;GO:0005623//cell;GO:0071944//cell periphery;GO:0005886//plasma membrane;GO:0005575//cellular_component	GO:0005215//transporter activity;GO:0003674//molecular_function	GO:0051234//establishment of localization;GO:0006810//transport;GO:0051179//localization;GO:0008150//biological_process;GO:0009987//cellular process
Bra008028	23.3333	6.33333	2.97667	0.766667	-1.95703	0.00121437	0.0163896	yes	AT1G72310 (E=9e-104) ATL3 | ATL3; protein binding / zinc ion binding	-	GO:0003674//molecular_function;GO:0005488//binding;GO:0005515//protein binding	-
Bra008038	94	21.6667	8.04	1.76	-2.19162	2.09511e-06	6.49178e-05	yes	AT1G72540 (E=3e-186) | protein kinase, putative	-	GO:0097159//organic cyclic compound binding;GO:1901363//heterocyclic compound binding;GO:0016740//transferase activity;GO:0016772//transferase activity, transferring phosphorus-containing groups;GO:0005488//binding;GO:0003674//molecular_function;GO:1901265//nucleoside phosphate binding;GO:0003824//catalytic activity;GO:0000166//nucleotide binding;GO:0016301//kinase activity;GO:0036094//small mole…	GO:0008150//biological_process;GO:0036211//protein modification process;GO:0043170//macromolecule metabolic process;GO:0044237//cellular metabolic process;GO:0006464//cellular protein modification process;GO:0019538//protein metabolic process;GO:0044260//cellular macromolecule metabolic process;GO:0043412//macromolecule modification;GO:0008152//metabolic process;GO:0044238//primary metabolic proc…
Bra008051	35	92.3333	2.61667	6.65	1.34562	0.000139668	0.00266378	yes	AT1G72810 (E=3e-270) | threonine synthase, putative	-	GO:0003674//molecular_function;GO:0005488//binding;GO:0003824//catalytic activity	GO:0009058//biosynthetic process;GO:0008152//metabolic process;GO:0008150//biological_process;GO:0009987//cellular process
Bra008066	9	35	1.19667	4.66333	1.96234	0.000234468	0.00410439	yes	AT1G73010 (E=2e-139) | phosphatase	-	GO:0003674//molecular_function;GO:0016787//hydrolase activity;GO:0003824//catalytic activity	GO:0009987//cellular process;GO:0008152//metabolic process;GO:0008150//biological_process
Bra008087	1.33333	9	0.1	0.67	2.74416	0.00211334	0.0257387	yes	AT1G73220 (E=1e-256) AtOCT1 | AtOCT1 (Arabidopsis thaliana ORGANIC CATION/CARNITINE TRANSPORTER1); carbohydrate transmembrane transporter/ carnitine transporter/ transporter	GO:0016020//membrane;GO:0005575//cellular_component	GO:0003674//molecular_function;GO:0005215//transporter activity	GO:0006810//transport;GO:0008150//biological_process;GO:0051179//localization;GO:0009987//cellular process;GO:0051234//establishment of localization
Bra008173	15.3333	60	1.32333	5.10667	1.94821	1.08348e-05	0.000288439	yes	AT1G74960 (E=1e-111) FAB1, KAS2 | FAB1 (FATTY ACID BIOSYNTHESIS 1); 3-oxoacyl-[acyl-carrier-protein] synthase/ fatty-acid synthase	-	GO:0016740//transferase activity;GO:0003674//molecular_function;GO:0003824//catalytic activity	GO:0008150//biological_process;GO:0006629//lipid metabolic process;GO:0044699//single-organism process;GO:0008152//metabolic process;GO:0009987//cellular process;GO:0009058//biosynthetic process;GO:0071704//organic substance metabolic process;GO:0044710//single-organism metabolic process;GO:0044238//primary metabolic process
Bra008188	19.6667	50	3.59333	8.57333	1.25453	0.00254433	0.0299599	yes	AT1G75270 (E=5e-099) DHAR2 | DHAR2 (DEHYDROASCORBATE REDUCTASE 2); glutathione binding / glutathione dehydrogenase (ascorbate)	GO:0044464//cell part;GO:0005886//plasma membrane;GO:0071944//cell periphery;GO:0005829//cytosol;GO:0044424//intracellular part;GO:0016020//membrane;GO:0005737//cytoplasm;GO:0005622//intracellular;GO:0044444//cytoplasmic part;GO:0005575//cellular_component;GO:0005623//cell	GO:0005488//binding;GO:0003824//catalytic activity;GO:0005515//protein binding;GO:0003674//molecular_function	GO:0019748//secondary metabolic process;GO:0044260//cellular macromolecule metabolic process;GO:0009987//cellular process;GO:0008150//biological_process;GO:0043170//macromolecule metabolic process;GO:0009056//catabolic process;GO:0036211//protein modification process;GO:0044238//primary metabolic process;GO:0044699//single-organism process;GO:0044237//cellular metabolic process;GO:0044710//single…
Bra008201	6	0.666667	0.593333	0.07	-3.08342	0.00359753	0.0396983	yes	AT1G75500 (E=5e-201) | nodulin MtN21 family protein	GO:0005575//cellular_component;GO:0016020//membrane	GO:0005215//transporter activity;GO:0003674//molecular_function	GO:0006810//transport;GO:0051234//establishment of localization;GO:0009987//cellular process;GO:0051179//localization;GO:0008150//biological_process
Bra008224	36	133	4.32667	15.69	1.85852	1.58616e-07	6.23267e-06	yes	-	-	-	-
Bra008260	35	8.33333	2.51667	0.586667	-2.1009	2.70932e-05	0.000646393	yes	AT1G76430 (E=1e-255) | phosphate transporter family protein	GO:0005575//cellular_component;GO:0016020//membrane	GO:0005215//transporter activity;GO:0003674//molecular_function	GO:0008150//biological_process;GO:0051179//localization;GO:0051234//establishment of localization;GO:0009987//cellular process;GO:0006810//transport
Bra008262	60.6667	176.667	8.42	23.2067	1.46265	0.000159335	0.00297841	yes	AT1G76500 (E=1e-055) SOB3, AHL29 | SOB3 (SUPPRESSOR OF PHYB-4#3); DNA binding	-	GO:0097159//organic cyclic compound binding;GO:0003676//nucleic acid binding;GO:0005488//binding;GO:1901363//heterocyclic compound binding;GO:0003674//molecular_function;GO:0003677//DNA binding	-
Bra008272	58	14.3333	8.61667	2.2	-1.96963	9.42729e-06	0.000253933	yes	-	-	-	-
Bra008299	39.6667	173.333	2.23667	9.67333	2.11266	3.49899e-10	2.20037e-08	yes	AT1G77280 (E=2e-193) | protein kinase family protein	-	GO:0000166//nucleotide binding;GO:1901363//heterocyclic compound binding;GO:0016301//kinase activity;GO:0036094//small molecule binding;GO:0005488//binding;GO:0016772//transferase activity, transferring phosphorus-containing groups;GO:0016740//transferase activity;GO:1901265//nucleoside phosphate binding;GO:0097159//organic cyclic compound binding;GO:0003674//molecular_function;GO:0003824//cataly…	GO:0008150//biological_process;GO:0044237//cellular metabolic process;GO:0044267//cellular protein metabolic process;GO:0009987//cellular process;GO:0044238//primary metabolic process;GO:0044260//cellular macromolecule metabolic process;GO:0006950//response to stress;GO:0071704//organic substance metabolic process;GO:0050896//response to stimulus;GO:0043412//macromolecule modification;GO:0008152/…
Bra008350	115	37.3333	8.25	2.56333	-1.68637	5.75674e-06	0.000162748	yes	AT1G78160 (E=2e-182) APUM7 | APUM7 (Arabidopsis Pumilio 7); RNA binding / binding	-	GO:0003676//nucleic acid binding;GO:0003723//RNA binding;GO:1901363//heterocyclic compound binding;GO:0003674//molecular_function;GO:0097159//organic cyclic compound binding;GO:0005488//binding	-
Bra008367	2.39333	18.66	0.286667	2.29667	3.0021	0.000103748	0.0020663	yes	-	-	-	-
Bra008406	4.33333	21.0367	0.376667	1.86333	2.30653	0.00123379	0.0165816	yes	AT1G79270 (E=6e-114) ECT8 | ECT8 (evolutionarily conserved C-terminal region 8)	-	GO:0003676//nucleic acid binding;GO:0003674//molecular_function;GO:1901363//heterocyclic compound binding;GO:0003723//RNA binding;GO:0005488//binding;GO:0097159//organic cyclic compound binding	-
Bra008518	0.333333	5	0.106667	1.59	3.89785	0.00437001	0.0463648	yes	AT4G00305 (E=2e-052) | zinc finger (C3HC4-type RING finger) family protein	-	GO:0005515//protein binding;GO:0003674//molecular_function;GO:0005488//binding	-
Bra008537	0	27.3767	0.001	4.61667	12.1726	1.88237e-09	1.04581e-07	yes	-	-	-	-
Bra008570	1099.67	472.667	199.19	82.94	-1.26401	1.02291e-07	4.16278e-06	yes	AT5G17220 (E=4e-094) ATGSTF12, GST26, TT19 | ATGSTF12 (ARABIDOPSIS THALIANA GLUTATHIONE S-TRANSFERASE PHI 12); glutathione transferase	-	GO:0003674//molecular_function;GO:0005515//protein binding;GO:0005488//binding	-
Bra008579	45.6667	5.33333	9.18667	1.08333	-3.08406	1.68603e-07	6.5846e-06	yes	AT5G17060 (E=1e-107) ATARFB1B | ATARFB1B; GTP binding	GO:0005575//cellular_component;GO:0044464//cell part;GO:0005622//intracellular;GO:0005623//cell	GO:0005488//binding;GO:1901363//heterocyclic compound binding;GO:1901265//nucleoside phosphate binding;GO:0097159//organic cyclic compound binding;GO:0036094//small molecule binding;GO:0003674//molecular_function;GO:0000166//nucleotide binding	GO:0044238//primary metabolic process;GO:0043412//macromolecule modification;GO:0050896//response to stimulus;GO:0009987//cellular process;GO:0044260//cellular macromolecule metabolic process;GO:0051716//cellular response to stimulus;GO:0044237//cellular metabolic process;GO:0065007//biological regulation;GO:0044267//cellular protein metabolic process;GO:0050794//regulation of cellular process;GO…
Bra008638	0	4.33333	0.001	0.35	8.45121	0.00332451	0.0372649	yes	-	-	-	-
Bra008644	12	0.333333	1.39333	0.03	-5.53743	1.93657e-06	6.0463e-05	yes	-	-	-	-
Bra008659	45.6667	19.3333	2.83	1.18667	-1.25389	0.00355987	0.0393916	yes	AT5G16000 (E=3e-292) NIK1 | NIK1 (NSP-INTERACTING KINASE 1); kinase	GO:0016020//membrane;GO:0005575//cellular_component	GO:0016740//transferase activity;GO:0000166//nucleotide binding;GO:1901265//nucleoside phosphate binding;GO:0036094//small molecule binding;GO:1901363//heterocyclic compound binding;GO:0003674//molecular_function;GO:0005515//protein binding;GO:0003824//catalytic activity;GO:0016301//kinase activity;GO:0097159//organic cyclic compound binding;GO:0005488//binding;GO:0016772//transferase activity, t…	GO:0044237//cellular metabolic process;GO:0043412//macromolecule modification;GO:0009987//cellular process;GO:0044238//primary metabolic process;GO:0044260//cellular macromolecule metabolic process;GO:0006464//cellular protein modification process;GO:0008150//biological_process;GO:0008152//metabolic process;GO:0043170//macromolecule metabolic process;GO:0044267//cellular protein metabolic process…
Bra008697	8.66667	0	1.82333	0.001	-10.8324	7.73989e-05	0.00160245	yes	-	-	-	-
Bra008717	1	7.33333	0.136667	1.03	2.91391	0.00399417	0.0432415	yes	AT5G15150 (E=4e-116) ATHB-3, HAT7, ATHB3 | ATHB-3 (ARABIDOPSIS THALIANA HOMEOBOX 3); DNA binding / sequence-specific DNA binding / transcription factor	GO:0043231//intracellular membrane-bounded organelle;GO:0005575//cellular_component;GO:0043227//membrane-bounded organelle;GO:0043226//organelle;GO:0005634//nucleus;GO:0005623//cell;GO:0043229//intracellular organelle;GO:0005622//intracellular;GO:0044424//intracellular part;GO:0044464//cell part	GO:1901363//heterocyclic compound binding;GO:0097159//organic cyclic compound binding;GO:0003676//nucleic acid binding;GO:0003674//molecular_function;GO:0001071//nucleic acid binding transcription factor activity;GO:0003677//DNA binding;GO:0003700//transcription factor activity, sequence-specific DNA binding;GO:0005488//binding	GO:0008150//biological_process;GO:0044238//primary metabolic process;GO:0034641//cellular nitrogen compound metabolic process;GO:0009987//cellular process;GO:0044237//cellular metabolic process;GO:0046483//heterocycle metabolic process;GO:1901360//organic cyclic compound metabolic process;GO:0006725//cellular aromatic compound metabolic process;GO:0008152//metabolic process;GO:0071704//organic su…
Bra008726	79	162	1.94667	4.00667	1.0414	0.00330346	0.0370679	yes	AT5G15070 (E=0.0) | acid phosphatase/ oxidoreductase/ transition metal ion binding	-	GO:0097159//organic cyclic compound binding;GO:0036094//small molecule binding;GO:0005488//binding;GO:1901363//heterocyclic compound binding;GO:0003824//catalytic activity;GO:0016301//kinase activity;GO:0000166//nucleotide binding;GO:0016772//transferase activity, transferring phosphorus-containing groups;GO:0016787//hydrolase activity;GO:0003674//molecular_function;GO:0016740//transferase activi…	GO:0008150//biological_process;GO:0006464//cellular protein modification process;GO:0044267//cellular protein metabolic process;GO:0043170//macromolecule metabolic process;GO:0043412//macromolecule modification;GO:0036211//protein modification process;GO:0008152//metabolic process;GO:0009987//cellular process;GO:0071704//organic substance metabolic process;GO:0019538//protein metabolic process;GO…
Bra008728	75.3333	34	5.25	2.38333	-1.13934	0.0018986	0.0235728	yes	AT5G14940 (E=1e-233) | proton-dependent oligopeptide transport (POT) family protein	GO:0005575//cellular_component;GO:0016020//membrane	GO:0003674//molecular_function;GO:0005215//transporter activity	GO:0051179//localization;GO:0006810//transport;GO:0008150//biological_process;GO:0051234//establishment of localization
Bra008761	46	120.333	4.83	12.5767	1.38065	6.62447e-05	0.00139871	yes	-	-	-	-
Bra008776	35.3333	123.667	2.37	7.94	1.74425	3.3441e-07	1.22935e-05	yes	-	-	-	-
Bra008781	53.6667	18.6667	7.47333	2.55667	-1.54749	0.000161034	0.0030049	yes	AT5G14080 (E=9e-124) | pentatricopeptide (PPR) repeat-containing protein	GO:0044444//cytoplasmic part;GO:0044464//cell part;GO:0044424//intracellular part;GO:0043226//organelle;GO:0043227//membrane-bounded organelle;GO:0005623//cell;GO:0043229//intracellular organelle;GO:0005622//intracellular;GO:0005737//cytoplasm;GO:0009536//plastid;GO:0043231//intracellular membrane-bounded organelle;GO:0005575//cellular_component	GO:0005515//protein binding;GO:0003674//molecular_function;GO:0005488//binding	GO:0000003//reproduction;GO:0007275//multicellular organism development;GO:0008150//biological_process;GO:0032502//developmental process;GO:0044707//single-multicellular organism process;GO:0050896//response to stimulus;GO:0044699//single-organism process;GO:0009791//post-embryonic development;GO:0009628//response to abiotic stimulus;GO:0044767//single-organism developmental process;GO:0032501//m…
Bra008788	15.6667	1	3.03333	0.203333	-3.89899	0.000160315	0.00299499	yes	AT5G14000 (E=5e-077) anac084 | anac084 (Arabidopsis NAC domain containing protein 84); transcription factor	GO:0044424//intracellular part;GO:0043231//intracellular membrane-bounded organelle;GO:0043226//organelle;GO:0043229//intracellular organelle;GO:0043227//membrane-bounded organelle;GO:0005575//cellular_component;GO:0005622//intracellular;GO:0044464//cell part;GO:0005623//cell;GO:0005634//nucleus	GO:0003677//DNA binding;GO:1901363//heterocyclic compound binding;GO:0003674//molecular_function;GO:0097159//organic cyclic compound binding;GO:0003676//nucleic acid binding;GO:0005488//binding	GO:0009987//cellular process;GO:0006725//cellular aromatic compound metabolic process;GO:0009058//biosynthetic process;GO:0044237//cellular metabolic process;GO:0006807//nitrogen compound metabolic process;GO:0008150//biological_process;GO:0008152//metabolic process;GO:0046483//heterocycle metabolic process;GO:0034641//cellular nitrogen compound metabolic process;GO:0071704//organic substance met…
Bra008789	13.6667	0.666667	0.783333	0.0366667	-4.41709	1.63851e-06	5.20833e-05	yes	AT5G13990 (E=8e-293) ATEXO70C2 | ATEXO70C2 (exocyst subunit EXO70 family protein C2); protein binding	GO:0005575//cellular_component;GO:0044424//intracellular part;GO:0005623//cell;GO:0005622//intracellular;GO:0005737//cytoplasm;GO:0044464//cell part	-	GO:0051234//establishment of localization;GO:0008150//biological_process;GO:0006810//transport;GO:0051179//localization;GO:0009987//cellular process
Bra008792	1581.67	227.667	157.387	21.7667	-2.85412	5.50786e-30	1.89198e-27	yes	AT5G13930 (E=4e-219) CHS, TT4, ATCHS | TT4 (TRANSPARENT TESTA 4); naringenin-chalcone synthase	-	GO:0003824//catalytic activity;GO:0003674//molecular_function;GO:0016740//transferase activity	GO:0008150//biological_process;GO:0009058//biosynthetic process;GO:0008152//metabolic process
Bra008817	75.3333	9.66667	4.04333	0.49	-3.04469	1.15868e-11	8.75062e-10	yes	AT5G13580 (E=0.0) | ABC transporter family protein	GO:0016020//membrane;GO:0005575//cellular_component	GO:1901265//nucleoside phosphate binding;GO:0005488//binding;GO:0097159//organic cyclic compound binding;GO:0036094//small molecule binding;GO:0000166//nucleotide binding;GO:1901363//heterocyclic compound binding;GO:0003824//catalytic activity;GO:0003674//molecular_function;GO:0016787//hydrolase activity	GO:0044710//single-organism metabolic process;GO:0008150//biological_process;GO:0009987//cellular process;GO:0008152//metabolic process;GO:0019748//secondary metabolic process;GO:0044699//single-organism process;GO:0009058//biosynthetic process
Bra008835	1.33333	17	0.246667	2.95667	3.58334	1.11393e-06	3.7107e-05	yes	AT5G13330 (E=7e-051) Rap2.6L | Rap2.6L (related to AP2 6L); DNA binding / transcription factor	GO:0044424//intracellular part;GO:0005623//cell;GO:0043229//intracellular organelle;GO:0043227//membrane-bounded organelle;GO:0044464//cell part;GO:0043231//intracellular membrane-bounded organelle;GO:0005575//cellular_component;GO:0043226//organelle;GO:0005634//nucleus;GO:0005622//intracellular	GO:0097159//organic cyclic compound binding;GO:0003674//molecular_function;GO:0003700//transcription factor activity, sequence-specific DNA binding;GO:1901363//heterocyclic compound binding;GO:0005488//binding;GO:0001071//nucleic acid binding transcription factor activity;GO:0003676//nucleic acid binding;GO:0003677//DNA binding	GO:0006725//cellular aromatic compound metabolic process;GO:0008150//biological_process;GO:1901360//organic cyclic compound metabolic process;GO:0008152//metabolic process;GO:0009058//biosynthetic process;GO:0006807//nitrogen compound metabolic process;GO:0006139//nucleobase-containing compound metabolic process;GO:0009987//cellular process;GO:0044238//primary metabolic process;GO:0044237//cellul…
Bra008850	12	53.6667	2.17667	9.95	2.19258	1.04621e-05	0.000280153	yes	AT5G13170 (E=4e-086) SAG29 | SAG29 (SENESCENCE-ASSOCIATED PROTEIN 29)	GO:0071944//cell periphery;GO:0005886//plasma membrane;GO:0005623//cell;GO:0044464//cell part;GO:0005575//cellular_component;GO:0016020//membrane	-	GO:0051234//establishment of localization;GO:0008150//biological_process;GO:0006810//transport;GO:0051179//localization
Bra008852	7.66667	0.333333	0.47	0.0166667	-4.81762	0.0016129	0.0205856	yes	AT5G13150 (E=3e-230) ATEXO70C1 | ATEXO70C1 (exocyst subunit EXO70 family protein C1); protein binding	GO:0005622//intracellular;GO:0005737//cytoplasm;GO:0044464//cell part;GO:0044424//intracellular part;GO:0005623//cell;GO:0005575//cellular_component	-	GO:0009987//cellular process;GO:0008150//biological_process;GO:0051234//establishment of localization;GO:0051179//localization;GO:0006810//transport
Bra008853	39.3333	4.33333	6.44333	0.67	-3.26557	1.27468e-07	5.10288e-06	yes	-	-	-	-
Bra008854	12.3333	2.66667	0.763333	0.17	-2.16678	0.00402469	0.0435397	yes	-	-	-	-
Bra008873	166.667	580.333	13.45	44.3867	1.72252	6.31526e-12	4.94479e-10	yes	AT5G12890 (E=7e-206) | UDP-glucoronosyl/UDP-glucosyl transferase family protein	-	GO:0003674//molecular_function;GO:0016740//transferase activity;GO:0003824//catalytic activity	GO:0008152//metabolic process;GO:0008150//biological_process
Bra008882	1	8.66667	0.0866667	0.64	2.88452	0.00464817	0.0486057	yes	-	-	-	-
Bra008890	359	181	8.12333	3.88	-1.06602	3.05958e-05	0.000719215	yes	AT5G12400 (E=9e-254) | PHD finger transcription factor, putative	-	GO:0005488//binding;GO:0003674//molecular_function;GO:0005515//protein binding	GO:0065007//biological regulation;GO:0044700//single organism signaling;GO:0008150//biological_process;GO:0007154//cell communication;GO:0050896//response to stimulus;GO:0050794//regulation of cellular process;GO:0007165//signal transduction;GO:0044699//single-organism process;GO:0009987//cellular process;GO:0044763//single-organism cellular process;GO:0050789//regulation of biological process;GO…
Bra008900	414.333	152.333	62.1067	21.7633	-1.51285	5.7298e-09	2.96668e-07	yes	AT5G12310 (E=1e-074) | zinc finger (C3HC4-type RING finger) family protein	-	GO:0005515//protein binding;GO:0003674//molecular_function;GO:0005488//binding	-
Bra008907	66	205	8.21333	24.2533	1.56214	1.55003e-07	6.11323e-06	yes	AT5G12210 (E=2e-167) | geranylgeranyl transferase type II beta subunit, putative / RAB geranylgeranyltransferase beta subunit, putative	GO:0005622//intracellular;GO:0005575//cellular_component;GO:0044444//cytoplasmic part;GO:0044464//cell part;GO:0005737//cytoplasm;GO:0044424//intracellular part;GO:0005829//cytosol;GO:0005623//cell	GO:0003824//catalytic activity;GO:0003674//molecular_function;GO:0016740//transferase activity	GO:0008152//metabolic process;GO:0044238//primary metabolic process;GO:0071704//organic substance metabolic process;GO:0043170//macromolecule metabolic process;GO:0009987//cellular process;GO:0044267//cellular protein metabolic process;GO:0043412//macromolecule modification;GO:0019538//protein metabolic process;GO:0036211//protein modification process;GO:0044237//cellular metabolic process;GO:000…
Bra008915	0.333333	11.3333	0.06	1.85667	4.95161	2.26954e-06	6.99833e-05	yes	AT5G12110 (E=2e-085) | elongation factor 1B alpha-subunit 1 (eEF1Balpha1)	GO:0005737//cytoplasm;GO:0005623//cell;GO:0044424//intracellular part;GO:0044464//cell part;GO:0005622//intracellular;GO:0005575//cellular_component	GO:0008135//translation factor activity, RNA binding;GO:0005488//binding;GO:1901363//heterocyclic compound binding;GO:0003676//nucleic acid binding;GO:0003723//RNA binding;GO:0097159//organic cyclic compound binding;GO:0003674//molecular_function	GO:0034645//cellular macromolecule biosynthetic process;GO:1901566//organonitrogen compound biosynthetic process;GO:0006518//peptide metabolic process;GO:0019538//protein metabolic process;GO:0043043//peptide biosynthetic process;GO:0044238//primary metabolic process;GO:0034641//cellular nitrogen compound metabolic process;GO:0009987//cellular process;GO:0044237//cellular metabolic process;GO:000…
Bra008916	97.6667	39	4.65333	1.85667	-1.32555	0.0033646	0.0376481	yes	AT5G12100 (E=0.0) | pentatricopeptide (PPR) repeat-containing protein	-	GO:0003674//molecular_function;GO:0005515//protein binding;GO:0005488//binding	-
Bra008921	0	10.6667	0.001	0.556667	9.12067	9.89671e-07	3.328e-05	yes	AT5G12000 (E=2e-297) | kinase	-	GO:0016740//transferase activity;GO:1901265//nucleoside phosphate binding;GO:1901363//heterocyclic compound binding;GO:0000166//nucleotide binding;GO:0005488//binding;GO:0016301//kinase activity;GO:0016772//transferase activity, transferring phosphorus-containing groups;GO:0097159//organic cyclic compound binding;GO:0036094//small molecule binding;GO:0003674//molecular_function;GO:0003824//cataly…	GO:0006950//response to stress;GO:0050896//response to stimulus;GO:0044237//cellular metabolic process;GO:0008152//metabolic process;GO:0071704//organic substance metabolic process;GO:0044238//primary metabolic process;GO:0006464//cellular protein modification process;GO:0036211//protein modification process;GO:0043412//macromolecule modification;GO:0008150//biological_process;GO:0019538//protein…
Bra008928	269	29.3333	52.85	5.44667	-3.27846	1.27331e-21	2.76074e-19	yes	AT5G11900 (E=3e-097) | eukaryotic translation initiation factor SUI1 family protein	GO:0005840//ribosome;GO:0043229//intracellular organelle;GO:0005622//intracellular;GO:0030529//intracellular ribonucleoprotein complex;GO:0044424//intracellular part;GO:0005623//cell;GO:0043228//non-membrane-bounded organelle;GO:1990904//ribonucleoprotein complex;GO:0005575//cellular_component;GO:0032991//macromolecular complex;GO:0044444//cytoplasmic part;GO:0005737//cytoplasm;GO:0043232//intrac…	GO:0005488//binding;GO:0003674//molecular_function;GO:0003676//nucleic acid binding;GO:0008135//translation factor activity, RNA binding;GO:0003723//RNA binding;GO:1901363//heterocyclic compound binding;GO:0097159//organic cyclic compound binding	GO:0071704//organic substance metabolic process;GO:0008150//biological_process;GO:0008152//metabolic process;GO:1901576//organic substance biosynthetic process;GO:1901564//organonitrogen compound metabolic process;GO:0043043//peptide biosynthetic process;GO:0034641//cellular nitrogen compound metabolic process;GO:0006807//nitrogen compound metabolic process;GO:0009987//cellular process;GO:0019538…
Bra008929	18.3333	56.3333	2.42	7.17	1.56697	0.000117671	0.00229395	yes	-	-	-	-
Bra008939	5.91	71.3333	1.07	12.6633	3.56497	1.04708e-09	6.09292e-08	yes	AT4G11630 (E=3e-078) | ribosomal protein L19 family protein	GO:0043228//non-membrane-bounded organelle;GO:0005575//cellular_component;GO:0043226//organelle;GO:0005623//cell;GO:0032991//macromolecular complex;GO:0043232//intracellular non-membrane-bounded organelle;GO:0005840//ribosome;GO:0005737//cytoplasm;GO:0030529//intracellular ribonucleoprotein complex;GO:1990904//ribonucleoprotein complex;GO:0043229//intracellular organelle;GO:0044444//cytoplasmic p…	GO:0005198//structural molecule activity;GO:0003674//molecular_function	GO:0034645//cellular macromolecule biosynthetic process;GO:0006807//nitrogen compound metabolic process;GO:0043604//amide biosynthetic process;GO:1901576//organic substance biosynthetic process;GO:0006518//peptide metabolic process;GO:0044267//cellular protein metabolic process;GO:0044238//primary metabolic process;GO:1901564//organonitrogen compound metabolic process;GO:0009058//biosynthetic pro…
Bra008940	10	46	6.09333	26.1767	2.10298	1.51458e-05	0.000386768	yes	-	-	-	-
Bra008942	11.3333	0.333333	1.54333	0.0466667	-5.04751	2.60123e-06	7.92928e-05	yes	AT5G11710 (E=5e-034) | epsin N-terminal homology (ENTH) domain-containing protein / clathrin assembly protein-related	GO:0044424//intracellular part;GO:0044464//cell part;GO:0043232//intracellular non-membrane-bounded organelle;GO:0043226//organelle;GO:0005794//Golgi apparatus;GO:0043227//membrane-bounded organelle;GO:0005856//cytoskeleton;GO:0005737//cytoplasm;GO:0005622//intracellular;GO:0005575//cellular_component;GO:0043229//intracellular organelle;GO:0044444//cytoplasmic part;GO:0005623//cell;GO:0009579//th…	GO:0005488//binding;GO:0003674//molecular_function;GO:0005515//protein binding	GO:0051234//establishment of localization;GO:0051179//localization;GO:0008150//biological_process;GO:0006810//transport
Bra008948	82.3333	9.66667	12.5633	1.45333	-3.11178	7.32658e-13	6.46561e-11	yes	-	-	-	-
Bra008951	9.66667	0.666667	0.69	0.05	-3.7866	0.000145847	0.00276954	yes	-	-	-	-
Bra008955	623.333	293.667	22.01	9.67	-1.18657	2.74384e-05	0.000652679	yes	-	-	-	-
Bra008979	72.01	160.967	4.49	9.77	1.12164	0.000988821	0.0138849	yes	AT5G11240 (E=8e-298) | transducin family protein / WD-40 repeat family protein	-	GO:0003674//molecular_function;GO:0005515//protein binding;GO:0005488//binding	-
Bra008982	596.267	154.53	85.76	21.9967	-1.96302	1.94757e-12	1.63299e-10	yes	-	-	-	-
Bra008984	50.4033	17.48	4.57667	1.63333	-1.48648	0.00069253	0.0103188	yes	AT5G11200 (E=5e-102) | DEAD/DEAH box helicase, putative	-	GO:0016787//hydrolase activity;GO:0005488//binding;GO:1901363//heterocyclic compound binding;GO:0036094//small molecule binding;GO:1901265//nucleoside phosphate binding;GO:0000166//nucleotide binding;GO:0003676//nucleic acid binding;GO:0097159//organic cyclic compound binding;GO:0003674//molecular_function;GO:0003824//catalytic activity	-
Bra008991	224.333	477	39.9833	80.3533	1.00696	0.000170447	0.00314745	yes	-	-	-	-
Bra008993	72	4	18.61	1.06	-4.13394	7.32251e-15	7.98378e-13	yes	-	-	-	-
Bra009003	16.3333	105	1.45333	8.97333	2.62628	5.91684e-11	4.11807e-09	yes	AT5G10930 (E=1e-144) CIPK5, SnRK3.24 | CIPK5 (CBL-INTERACTING PROTEIN KINASE 5); ATP binding / kinase/ protein kinase/ protein serine/threonine kinase	-	GO:0016772//transferase activity, transferring phosphorus-containing groups;GO:1901265//nucleoside phosphate binding;GO:0016301//kinase activity;GO:1901363//heterocyclic compound binding;GO:0003674//molecular_function;GO:0005488//binding;GO:0003824//catalytic activity;GO:0000166//nucleotide binding;GO:0097159//organic cyclic compound binding;GO:0016740//transferase activity;GO:0036094//small mole…	GO:0071704//organic substance metabolic process;GO:0050789//regulation of biological process;GO:0008150//biological_process;GO:0051716//cellular response to stimulus;GO:0043412//macromolecule modification;GO:0044267//cellular protein metabolic process;GO:0044237//cellular metabolic process;GO:0044699//single-organism process;GO:0065007//biological regulation;GO:0009987//cellular process;GO:000715…
Bra009019	63	167.78	4.88	12.77	1.38781	3.17041e-05	0.000741448	yes	AT5G10610 (E=2e-236) CYP81K1 | CYP81K1; electron carrier/ heme binding / iron ion binding / monooxygenase/ oxygen binding	-	GO:0003674//molecular_function;GO:0005488//binding;GO:0003824//catalytic activity	GO:0008152//metabolic process;GO:0008150//biological_process
Bra009020	156	1198.55	12.4233	89.3433	2.84631	3.26836e-20	5.96635e-18	yes	AT5G10610 (E=3e-235) CYP81K1 | CYP81K1; electron carrier/ heme binding / iron ion binding / monooxygenase/ oxygen binding	-	GO:0003674//molecular_function;GO:0003824//catalytic activity;GO:0005488//binding	GO:0008150//biological_process;GO:0008152//metabolic process
Bra009030	475.667	110.333	16.4733	3.77	-2.1275	1.8553e-07	7.17546e-06	yes	-	-	-	-
Bra009036	13	0	1.41	0.001	-10.4615	3.28779e-07	1.21144e-05	yes	AT5G10410 (E=1e-128) | epsin N-terminal homology (ENTH) domain-containing protein / clathrin assembly protein-related	-	GO:0005488//binding;GO:0008289//lipid binding;GO:0003674//molecular_function	-
Bra009037	277.667	76.3333	37.16	9.64333	-1.94615	1.21783e-10	8.1391e-09	yes	AT5G10380 (E=1e-055) RING1 | RING1; protein binding / ubiquitin-protein ligase/ zinc ion binding	GO:0005623//cell;GO:0044464//cell part;GO:0071944//cell periphery;GO:0005575//cellular_component;GO:0016020//membrane;GO:0005886//plasma membrane	GO:0005488//binding;GO:0003824//catalytic activity;GO:0016740//transferase activity;GO:0003674//molecular_function;GO:0005515//protein binding	GO:0065007//biological regulation;GO:0007154//cell communication;GO:0050794//regulation of cellular process;GO:0006807//nitrogen compound metabolic process;GO:0034641//cellular nitrogen compound metabolic process;GO:0008152//metabolic process;GO:0009058//biosynthetic process;GO:0009607//response to biotic stimulus;GO:0008219//cell death;GO:0044699//single-organism process;GO:0006464//cellular pro…
Bra009048	803.333	391.667	99.6833	47.14	-1.0804	0.000211311	0.00376494	yes	AT5G10230 (E=1e-157) ANNAT7, ANN7 | ANNAT7 (ANNEXIN ARABIDOPSIS 7); calcium ion binding / calcium-dependent phospholipid binding	-	GO:0005488//binding;GO:0008289//lipid binding;GO:0003674//molecular_function	-
Bra009053	17.4367	1	1.91667	0.0966667	-4.30944	6.9452e-07	2.40641e-05	yes	-	-	-	-
Bra009057	25.6667	133	2.70333	14.3867	2.41192	3.04443e-07	1.12566e-05	yes	AT5G10100 (E=1e-163) | trehalose-6-phosphate phosphatase, putative	-	GO:0003674//molecular_function;GO:0003824//catalytic activity;GO:0016787//hydrolase activity	GO:0044238//primary metabolic process;GO:0008152//metabolic process;GO:0009058//biosynthetic process;GO:0005975//carbohydrate metabolic process;GO:0008150//biological_process;GO:0009987//cellular process;GO:0071704//organic substance metabolic process
Bra009071	0.333333	10.3333	0.0566667	1.64667	4.8609	6.20419e-06	0.000174165	yes	-	-	-	-
Bra009075	0	13.6667	0.001	1.6	10.6439	5.14775e-06	0.00014683	yes	AT2G19930 (E=5e-046) | RNA-dependent RNA polymerase family protein	-	GO:0003674//molecular_function;GO:0016740//transferase activity;GO:0003824//catalytic activity	GO:0008150//biological_process;GO:0008152//metabolic process;GO:0006807//nitrogen compound metabolic process;GO:0046483//heterocycle metabolic process;GO:0009987//cellular process;GO:1901360//organic cyclic compound metabolic process;GO:0006139//nucleobase-containing compound metabolic process;GO:0034641//cellular nitrogen compound metabolic process;GO:0009058//biosynthetic process;GO:0006725//ce…
Bra009080	62.6667	24.6667	26.3333	10.5233	-1.3233	0.000860336	0.012358	yes	AT5G09830 (E=1e-029) | BolA-like family protein	GO:0044464//cell part;GO:0005634//nucleus;GO:0043231//intracellular membrane-bounded organelle;GO:0043227//membrane-bounded organelle;GO:0005622//intracellular;GO:0005623//cell;GO:0043229//intracellular organelle;GO:0005575//cellular_component;GO:0005737//cytoplasm;GO:0043226//organelle;GO:0044424//intracellular part	-	GO:0043170//macromolecule metabolic process;GO:0008152//metabolic process;GO:0006259//DNA metabolic process;GO:0006139//nucleobase-containing compound metabolic process;GO:0044237//cellular metabolic process;GO:0044238//primary metabolic process;GO:0009987//cellular process;GO:0008150//biological_process;GO:0050896//response to stimulus;GO:0046483//heterocycle metabolic process;GO:1901360//organi…
Bra009089	73.9633	152.333	3.48667	7.04333	1.01441	0.0012908	0.0172103	yes	AT5G05130 (E=9e-271) | SNF2 domain-containing protein / helicase domain-containing protein / RING finger domain-containing protein	-	GO:0036094//small molecule binding;GO:0016787//hydrolase activity;GO:0097159//organic cyclic compound binding;GO:0003676//nucleic acid binding;GO:1901363//heterocyclic compound binding;GO:0000166//nucleotide binding;GO:0005488//binding;GO:0003824//catalytic activity;GO:0003674//molecular_function;GO:1901265//nucleoside phosphate binding;GO:0003677//DNA binding;GO:0005515//protein binding	-
Bra009093	10	28.3333	0.676667	1.86333	1.46137	0.00388985	0.0424113	yes	-	-	-	-
Bra009096	1	8.33333	0.283333	2.13333	2.91254	0.002864	0.0330779	yes	AT5G05220 (E=8e-049) | unknown protein	GO:0005623//cell;GO:0005622//intracellular;GO:0044464//cell part;GO:0043231//intracellular membrane-bounded organelle;GO:0009536//plastid;GO:0044424//intracellular part;GO:0043229//intracellular organelle;GO:0005575//cellular_component;GO:0043226//organelle;GO:0043227//membrane-bounded organelle;GO:0005737//cytoplasm;GO:0044444//cytoplasmic part	-	-
Bra009113	40.6667	8.33333	7.81667	1.46333	-2.4173	1.26453e-06	4.15178e-05	yes	-	-	-	-
Bra009124	5.33333	17.3333	0.826667	2.54	1.61945	0.00330303	0.0370679	yes	-	-	-	-
Bra009127	39.6667	110.667	2.48	6.94667	1.48598	3.85671e-05	0.000873186	yes	AT3G11240 (E=2e-203) ATE2 | ATE2 (ARGININE-TRNA PROTEIN TRANSFERASE 2); arginyltransferase	GO:0044464//cell part;GO:0005575//cellular_component;GO:0044424//intracellular part;GO:0005737//cytoplasm;GO:0005622//intracellular;GO:0005623//cell	GO:0003824//catalytic activity;GO:0016740//transferase activity;GO:1901265//nucleoside phosphate binding;GO:0000166//nucleotide binding;GO:1901363//heterocyclic compound binding;GO:0005488//binding;GO:0097159//organic cyclic compound binding;GO:0036094//small molecule binding;GO:0003674//molecular_function	GO:0044260//cellular macromolecule metabolic process;GO:0051234//establishment of localization;GO:0006810//transport;GO:0050896//response to stimulus;GO:0034641//cellular nitrogen compound metabolic process;GO:0006807//nitrogen compound metabolic process;GO:0006725//cellular aromatic compound metabolic process;GO:0007275//multicellular organism development;GO:0009056//catabolic process;GO:0009987…
Bra009136	6.66667	33.6667	0.65	3.2	2.29956	3.90682e-06	0.000113875	yes	AT5G05810 (E=7e-126) ATL43 | ATL43; protein binding / zinc ion binding	-	GO:0005515//protein binding;GO:0003674//molecular_function;GO:0005488//binding	-
Bra009141	79.3333	4.66667	2.93333	0.18	-4.02647	3.25869e-12	2.65567e-10	yes	AT5G22690 (E=3e-236) | disease resistance protein (TIR-NBS-LRR class), putative	-	GO:1901265//nucleoside phosphate binding;GO:0000166//nucleotide binding;GO:0003824//catalytic activity;GO:0005488//binding;GO:1901363//heterocyclic compound binding;GO:0036094//small molecule binding;GO:0016787//hydrolase activity;GO:0005515//protein binding;GO:0097159//organic cyclic compound binding;GO:0003674//molecular_function	GO:0065007//biological regulation;GO:0007165//signal transduction;GO:0044763//single-organism cellular process;GO:0008150//biological_process;GO:0009987//cellular process;GO:0007154//cell communication;GO:0050789//regulation of biological process;GO:0044699//single-organism process;GO:0044700//single organism signaling;GO:0006950//response to stress;GO:0050794//regulation of cellular process;GO:0…
Bra009143	1	25.3333	0.09	2.10667	4.54889	3.15179e-09	1.70079e-07	yes	AT5G05870 (E=6e-198) UGT76C1 | UGT76C1 (UDP-glucosyl transferase 76C1); UDP-glycosyltransferase/ cis-zeatin O-beta-D-glucosyltransferase/ cytokinin 7-beta-glucosyltransferase/ cytokinin 9-beta-glucosyltransferase/ trans-zeatin O-beta-D-glucosyltransferase/ transferase, transferring gly	-	GO:0003674//molecular_function;GO:0016740//transferase activity;GO:0003824//catalytic activity	GO:0008152//metabolic process;GO:0008150//biological_process
Bra009150	67.6667	168.333	7.14333	17.9	1.32529	6.34122e-05	0.00134782	yes	AT5G05920 (E=2e-207) DHS, EDA22 | DHS (DEOXYHYPUSINE SYNTHASE)	-	-	GO:0008152//metabolic process;GO:0009058//biosynthetic process;GO:0044267//cellular protein metabolic process;GO:0044767//single-organism developmental process;GO:0043412//macromolecule modification;GO:0007275//multicellular organism development;GO:0044238//primary metabolic process;GO:0036211//protein modification process;GO:0009987//cellular process;GO:0006464//cellular protein modification pro…
Bra009156	57.6667	136	2.75	6.25	1.18442	0.000115799	0.00226387	yes	AT5G05980 (E=2e-260) ATDFB, DFB | ATDFB (A. THALIANA DHFS-FPGS HOMOLOG B); tetrahydrofolylpolyglutamate synthase	-	GO:0036094//small molecule binding;GO:0003824//catalytic activity;GO:0005488//binding;GO:0097159//organic cyclic compound binding;GO:1901265//nucleoside phosphate binding;GO:0000166//nucleotide binding;GO:0003674//molecular_function;GO:1901363//heterocyclic compound binding	GO:0009987//cellular process;GO:0008152//metabolic process;GO:0009058//biosynthetic process;GO:0008150//biological_process
Bra009158	67.6667	503	2.77	19.6	2.8229	6.48006e-25	1.75393e-22	yes	AT5G06050 (E=0.0) | dehydration-responsive protein-related	GO:0005622//intracellular;GO:0005737//cytoplasm;GO:0044464//cell part;GO:0044424//intracellular part;GO:0005575//cellular_component;GO:0005623//cell	GO:0008135//translation factor activity, RNA binding;GO:0097159//organic cyclic compound binding;GO:0000166//nucleotide binding;GO:0036094//small molecule binding;GO:0003676//nucleic acid binding;GO:0003824//catalytic activity;GO:0003674//molecular_function;GO:0005488//binding;GO:0003723//RNA binding;GO:0016740//transferase activity;GO:1901363//heterocyclic compound binding;GO:1901265//nucleoside…	GO:0071704//organic substance metabolic process;GO:0044260//cellular macromolecule metabolic process;GO:0034645//cellular macromolecule biosynthetic process;GO:0044267//cellular protein metabolic process;GO:0009058//biosynthetic process;GO:0019538//protein metabolic process;GO:0008150//biological_process;GO:0043170//macromolecule metabolic process;GO:1901566//organonitrogen compound biosynthetic …
Bra009159	0	4	0.001	0.57	9.15482	0.00355055	0.0393157	yes	AT5G06060 (E=1e-117) | tropinone reductase, putative / tropine dehydrogenase, putative	-	GO:0003674//molecular_function;GO:0003824//catalytic activity	GO:0008150//biological_process;GO:0008152//metabolic process
Bra009165	0.333333	27	0.09	6.75667	6.23024	8.76251e-12	6.72902e-10	yes	AT3G11510 (E=3e-063) | 40S ribosomal protein S14 (RPS14B)	GO:0005623//cell;GO:0005840//ribosome;GO:0043232//intracellular non-membrane-bounded organelle;GO:0005737//cytoplasm;GO:0044444//cytoplasmic part;GO:1990904//ribonucleoprotein complex;GO:0043228//non-membrane-bounded organelle;GO:0044464//cell part;GO:0030529//intracellular ribonucleoprotein complex;GO:0005622//intracellular;GO:0044424//intracellular part;GO:0043226//organelle;GO:0005575//cellula…	GO:0005198//structural molecule activity;GO:0003674//molecular_function	GO:0009058//biosynthetic process;GO:1901566//organonitrogen compound biosynthetic process;GO:0044271//cellular nitrogen compound biosynthetic process;GO:0006807//nitrogen compound metabolic process;GO:0008152//metabolic process;GO:0009059//macromolecule biosynthetic process;GO:0006412//translation;GO:0034641//cellular nitrogen compound metabolic process;GO:0006518//peptide metabolic process;GO:00…
Bra009167	312	100.333	24.6867	7.83667	-1.65542	2.77748e-09	1.50644e-07	yes	AT5G43610 (E=2e-199) ATSUC6 | ATSUC6 (Sucrose-proton symporter 6); carbohydrate transmembrane transporter/ sucrose:hydrogen symporter/ sugar:hydrogen symporter	GO:0005886//plasma membrane;GO:0071944//cell periphery;GO:0044464//cell part;GO:0005623//cell;GO:0005575//cellular_component;GO:0016020//membrane	GO:0003674//molecular_function;GO:0005215//transporter activity	GO:0006810//transport;GO:0051179//localization;GO:0051234//establishment of localization;GO:0009987//cellular process;GO:0008150//biological_process
Bra009182	25.3333	3.33333	4.62	0.55	-3.07039	7.78028e-07	2.67257e-05	yes	AT5G06300 (E=4e-109) | carboxy-lyase	GO:0044464//cell part;GO:0044444//cytoplasmic part;GO:0005737//cytoplasm;GO:0044424//intracellular part;GO:0005829//cytosol;GO:0005622//intracellular;GO:0005623//cell;GO:0005575//cellular_component	-	GO:0006810//transport;GO:0009605//response to external stimulus;GO:0051234//establishment of localization;GO:0044699//single-organism process;GO:0009991//response to extracellular stimulus;GO:0009987//cellular process;GO:0007154//cell communication;GO:0008150//biological_process;GO:0006950//response to stress;GO:0051179//localization;GO:0009719//response to endogenous stimulus;GO:0044763//single-…
Bra009188	91	229.667	13.71	33.25	1.27813	4.03778e-06	0.000117265	yes	-	-	-	-
Bra009199	177.333	75.6667	33.67	13.54	-1.31424	0.000310697	0.00521573	yes	AT5G06500 (E=1e-034) AGL96 | AGL96 (AGAMOUS-LIKE 96); DNA binding / transcription factor	GO:0044424//intracellular part;GO:0043227//membrane-bounded organelle;GO:0043226//organelle;GO:0043231//intracellular membrane-bounded organelle;GO:0005622//intracellular;GO:0005575//cellular_component;GO:0005623//cell;GO:0044464//cell part;GO:0005634//nucleus;GO:0043229//intracellular organelle	GO:0097159//organic cyclic compound binding;GO:0005488//binding;GO:0003676//nucleic acid binding;GO:0003677//DNA binding;GO:1901363//heterocyclic compound binding;GO:0005515//protein binding;GO:0003674//molecular_function	GO:0044237//cellular metabolic process;GO:0008152//metabolic process;GO:0044238//primary metabolic process;GO:1901360//organic cyclic compound metabolic process;GO:0006725//cellular aromatic compound metabolic process;GO:0009987//cellular process;GO:0009058//biosynthetic process;GO:0006807//nitrogen compound metabolic process;GO:0034641//cellular nitrogen compound metabolic process;GO:0046483//he…
Bra009202	72.6667	0.666667	26.4967	0.263333	-6.65278	1.85137e-21	3.8656e-19	yes	-	-	-	-
Bra009203	429	40.6667	22.3567	2.15333	-3.37606	2.37053e-22	5.40921e-20	yes	AT5G06530 (E=0.0) | ABC transporter family protein	GO:0016020//membrane;GO:0005575//cellular_component	GO:0003824//catalytic activity;GO:0036094//small molecule binding;GO:1901363//heterocyclic compound binding;GO:0000166//nucleotide binding;GO:0097159//organic cyclic compound binding;GO:0016787//hydrolase activity;GO:1901265//nucleoside phosphate binding;GO:0005488//binding;GO:0003674//molecular_function	-
Bra009204	11.6667	39.3333	0.88	2.89667	1.71882	0.000146019	0.00277003	yes	AT5G06540 (E=2e-260) | pentatricopeptide (PPR) repeat-containing protein	-	GO:0005515//protein binding;GO:0003674//molecular_function;GO:0005488//binding	-
Bra009220	118.333	507.667	13.4267	55.93	2.05852	2.53922e-11	1.84779e-09	yes	AT5G06720 (E=1e-149) | peroxidase, putative	GO:0005737//cytoplasm;GO:0044444//cytoplasmic part;GO:0005623//cell;GO:0005575//cellular_component;GO:0043231//intracellular membrane-bounded organelle;GO:0044464//cell part;GO:0044424//intracellular part;GO:0043226//organelle;GO:0005794//Golgi apparatus;GO:0005622//intracellular;GO:0012505//endomembrane system;GO:0043229//intracellular organelle;GO:0043227//membrane-bounded organelle	GO:0003674//molecular_function;GO:0003824//catalytic activity;GO:0005488//binding	GO:0032502//developmental process;GO:0090567//reproductive shoot system development;GO:0048731//system development;GO:0044699//single-organism process;GO:0022414//reproductive process;GO:0048367//shoot system development;GO:0009791//post-embryonic development;GO:0003006//developmental process involved in reproduction;GO:0006950//response to stress;GO:0009607//response to biotic stimulus;GO:000815…
Bra009221	239.333	27.6667	25.94	2.67333	-3.27847	4.95735e-14	5.01163e-12	yes	AT5G06730 (E=2e-148) | peroxidase, putative	GO:0043226//organelle;GO:0044444//cytoplasmic part;GO:0005737//cytoplasm;GO:0005622//intracellular;GO:0044424//intracellular part;GO:0005623//cell;GO:0043229//intracellular organelle;GO:0044464//cell part;GO:0043227//membrane-bounded organelle;GO:0005773//vacuole;GO:0043231//intracellular membrane-bounded organelle;GO:0005575//cellular_component;GO:0016020//membrane	GO:0005488//binding;GO:0003674//molecular_function;GO:0003824//catalytic activity	GO:0008150//biological_process;GO:0008152//metabolic process;GO:0050896//response to stimulus;GO:0006950//response to stress
Bra009226	32.6667	91.6667	4.11	11.5067	1.48526	4.17208e-05	0.000936622	yes	AT5G06780 (E=1e-125) | emsy N terminus domain-containing protein / ENT domain-containing protein	-	-	GO:0008152//metabolic process;GO:0008150//biological_process;GO:0009987//cellular process;GO:0009058//biosynthetic process;GO:0044238//primary metabolic process;GO:0071704//organic substance metabolic process;GO:0005975//carbohydrate metabolic process
Bra009228	100.667	5.33333	10.5	0.56	-4.22882	6.75152e-19	1.08931e-16	yes	AT5G06800 (E=2e-122) | myb family transcription factor	-	GO:0003677//DNA binding;GO:0003674//molecular_function;GO:0005488//binding;GO:0003676//nucleic acid binding;GO:1901363//heterocyclic compound binding;GO:0097159//organic cyclic compound binding;GO:0003682//chromatin binding;GO:0044877//macromolecular complex binding	-
Bra009231	65	23	3.73667	1.25333	-1.57598	9.69247e-05	0.00195354	yes	AT5G06820 (E=1e-148) SRF2 | SRF2 (STRUBBELIG-RECEPTOR FAMILY 2); ATP binding / kinase/ protein serine/threonine kinase	-	GO:0016301//kinase activity;GO:0003824//catalytic activity;GO:0000166//nucleotide binding;GO:0016772//transferase activity, transferring phosphorus-containing groups;GO:0097159//organic cyclic compound binding;GO:0005488//binding;GO:0003674//molecular_function;GO:0016740//transferase activity;GO:1901265//nucleoside phosphate binding;GO:1901363//heterocyclic compound binding;GO:0036094//small mole…	GO:0044267//cellular protein metabolic process;GO:0008150//biological_process;GO:0044260//cellular macromolecule metabolic process;GO:0043412//macromolecule modification;GO:0071704//organic substance metabolic process;GO:0009987//cellular process;GO:0006464//cellular protein modification process;GO:0044238//primary metabolic process;GO:0036211//protein modification process;GO:0044237//cellular me…
Bra009235	1228.67	609	141.603	69.4267	-1.02829	0.000342742	0.00568202	yes	AT5G06860 (E=6e-138) PGIP1, ATPGIP1 | PGIP1 (POLYGALACTURONASE INHIBITING PROTEIN 1); protein binding	-	GO:0005488//binding;GO:0005515//protein binding;GO:0003674//molecular_function	-
Bra009236	365.667	150	41.5633	17.17	-1.27542	0.00103069	0.0143284	yes	AT5G06860 (E=5e-138) PGIP1, ATPGIP1 | PGIP1 (POLYGALACTURONASE INHIBITING PROTEIN 1); protein binding	-	GO:0003674//molecular_function;GO:0005488//binding;GO:0005515//protein binding	-
Bra009238	225	4.66667	26.27	0.476667	-5.78429	2.26716e-35	1.09737e-32	yes	AT5G06860 (E=4e-133) PGIP1, ATPGIP1 | PGIP1 (POLYGALACTURONASE INHIBITING PROTEIN 1); protein binding	-	GO:0005515//protein binding;GO:0005488//binding;GO:0003674//molecular_function	-
Bra009242	93.3333	0.333333	22.7267	0.0866667	-8.03469	9.45823e-29	3.05205e-26	yes	-	-	-	-
Bra009261	123	43.6667	23.54	8.11333	-1.53675	3.85112e-06	0.00011256	yes	AT5G07460 (E=1e-101) PMSR2, ATMSRA2 | PMSR2 (PEPTIDEMETHIONINE SULFOXIDE REDUCTASE 2); oxidoreductase, acting on sulfur group of donors, disulfide as acceptor / peptide-methionine-(S)-S-oxide reductase	-	GO:0003824//catalytic activity;GO:0003674//molecular_function	GO:0043170//macromolecule metabolic process;GO:0019538//protein metabolic process;GO:0008152//metabolic process;GO:0006950//response to stress;GO:0008150//biological_process;GO:0071704//organic substance metabolic process;GO:0009987//cellular process;GO:0050896//response to stimulus;GO:0044238//primary metabolic process
Bra009268	71	254.333	9.82333	33.76	1.78103	3.0334e-08	1.38634e-06	yes	AT5G07370 (E=2e-144) IPK2a, ATIPK2A | IPK2a (INOSITOL POLYPHOSPHATE KINASE 2 ALPHA); inositol or phosphatidylinositol kinase/ inositol trisphosphate 6-kinase	GO:0005737//cytoplasm;GO:0044464//cell part;GO:0005623//cell;GO:0005886//plasma membrane;GO:0071944//cell periphery;GO:0043229//intracellular organelle;GO:0044444//cytoplasmic part;GO:0005634//nucleus;GO:0043231//intracellular membrane-bounded organelle;GO:0005829//cytosol;GO:0005622//intracellular;GO:0043226//organelle;GO:0016020//membrane;GO:0005575//cellular_component;GO:0043227//membrane-boun…	GO:0003824//catalytic activity;GO:0016772//transferase activity, transferring phosphorus-containing groups;GO:0016740//transferase activity;GO:0016301//kinase activity;GO:0003674//molecular_function	GO:0048856//anatomical structure development;GO:0005975//carbohydrate metabolic process;GO:0044763//single-organism cellular process;GO:0044703//multi-organism reproductive process;GO:0071704//organic substance metabolic process;GO:0040007//growth;GO:0016049//cell growth;GO:0008150//biological_process;GO:0009653//anatomical structure morphogenesis;GO:0016043//cellular component organization;GO:00…
Bra009295	69	271.667	9.10333	34.71	1.93088	1.65876e-09	9.32749e-08	yes	AT3G12480 (E=5e-077) NF-YC11 | NF-YC11 (NUCLEAR FACTOR Y, SUBUNIT C11); DNA binding / transcription factor	GO:0043231//intracellular membrane-bounded organelle;GO:0005622//intracellular;GO:0043229//intracellular organelle;GO:0005634//nucleus;GO:0044464//cell part;GO:0044424//intracellular part;GO:0043227//membrane-bounded organelle;GO:0005575//cellular_component;GO:0043226//organelle;GO:0005623//cell	GO:0005515//protein binding;GO:1901363//heterocyclic compound binding;GO:0003676//nucleic acid binding;GO:0097159//organic cyclic compound binding;GO:0003677//DNA binding;GO:0003674//molecular_function;GO:0005488//binding	-
Bra009302	203.333	39.6667	27.8633	5.30333	-2.3934	4.85272e-07	1.73795e-05	yes	-	-	-	-
Bra009305	71	164.667	6.12667	13.21	1.10846	0.000804095	0.0117135	yes	AT5G07720 (E=1e-232) | galactosyl transferase GMA12/MNN10 family protein	GO:0005575//cellular_component;GO:0016020//membrane	GO:0003824//catalytic activity;GO:0016740//transferase activity;GO:0003674//molecular_function	GO:0071704//organic substance metabolic process;GO:0009987//cellular process;GO:0008152//metabolic process;GO:0044238//primary metabolic process;GO:0005975//carbohydrate metabolic process;GO:0008150//biological_process
Bra009309	48.6667	113.333	3.83667	9.12	1.24918	0.00198431	0.0244297	yes	AT5G07820 (E=1e-078) | FUNCTIONS IN: molecular_function unknown; INVOLVED IN: biological_process unknown; LOCATED IN: cellular_component unknown; EXPRESSED IN: 11 plant structures; EXPRESSED DURING: 8 growth stages; CONTAINS InterPro DOMAIN/s: Calmodulin-binding, plant (InterPro:IPR012417); BEST Arabidopsis thaliana protein match is: chromosome scaffold protein-related (TAIR:AT5G61260.1); Has 109…	-	GO:0005515//protein binding;GO:0003674//molecular_function;GO:0005488//binding	-
Bra009310	828	187	69.0633	15.1367	-2.18987	3.95651e-16	4.84271e-14	yes	AT5G07830 (E=2e-224) AtGUS2 | AtGUS2 (Arabidopsis thaliana glucuronidase 2); beta-glucuronidase	GO:0005618//cell wall;GO:0005575//cellular_component;GO:0016020//membrane;GO:0005623//cell;GO:0030312//external encapsulating structure;GO:0071944//cell periphery;GO:0044464//cell part	GO:0003674//molecular_function;GO:0003824//catalytic activity;GO:0016787//hydrolase activity	GO:0071704//organic substance metabolic process;GO:0040007//growth;GO:0008152//metabolic process;GO:0032502//developmental process;GO:0044763//single-organism cellular process;GO:0009653//anatomical structure morphogenesis;GO:0048856//anatomical structure development;GO:0044238//primary metabolic process;GO:0016043//cellular component organization;GO:0016049//cell growth;GO:0009987//cellular proc…
Bra009311	59.6667	132.667	2.28667	5.08667	1.15347	0.000936141	0.0132738	yes	AT5G07890 (E=1e-135) | myosin heavy chain-related	-	GO:0005515//protein binding;GO:0003674//molecular_function;GO:0005488//binding	-
Bra009313	50	147.667	9.08333	25.5667	1.49297	0.000200953	0.00361671	yes	AT5G08000 (E=2e-052) E13L3, PDCB2 | E13L3 (GLUCAN ENDO-1,3-BETA-GLUCOSIDASE-LIKE PROTEIN 3); callose binding / polysaccharide binding	GO:0016020//membrane;GO:0005575//cellular_component;GO:0044464//cell part;GO:0071944//cell periphery;GO:0005623//cell;GO:0005886//plasma membrane	GO:0005488//binding;GO:0003674//molecular_function;GO:0030246//carbohydrate binding	-
Bra009316	0	47.6667	0.001	4.93667	12.2693	1.0533e-15	1.22805e-13	yes	AT5G08030 (E=2e-186) | glycerophosphoryl diester phosphodiesterase family protein	-	GO:0003824//catalytic activity;GO:0003674//molecular_function;GO:0016787//hydrolase activity	GO:0006629//lipid metabolic process;GO:0044699//single-organism process;GO:0009987//cellular process;GO:0071704//organic substance metabolic process;GO:0005975//carbohydrate metabolic process;GO:0008150//biological_process;GO:0044238//primary metabolic process;GO:0044710//single-organism metabolic process;GO:0008152//metabolic process
Bra009336	170.967	481.333	19.2233	52.06	1.43732	1.62024e-09	9.16112e-08	yes	AT5G08300 (E=1e-188) | succinyl-CoA ligase (GDP-forming) alpha-chain, mitochondrial, putative / succinyl-CoA synthetase, alpha chain, putative / SCS-alpha, putative	-	GO:0016740//transferase activity;GO:0003824//catalytic activity;GO:0005488//binding;GO:0003674//molecular_function	GO:0008152//metabolic process;GO:0008150//biological_process
Bra009343	0	11.3333	0.001	4.42667	12.112	2.56487e-06	7.83338e-05	yes	-	-	-	-
Bra009344	339.667	930.667	22.25	62.5933	1.4922	1.65263e-06	5.24278e-05	yes	AT5G08500 (E=2e-314) | transmembrane CLPTM1 family protein	GO:0016020//membrane;GO:0005575//cellular_component	-	GO:0008152//metabolic process;GO:0050896//response to stimulus;GO:0007049//cell cycle;GO:0006950//response to stress;GO:0071704//organic substance metabolic process;GO:0016043//cellular component organization;GO:0034641//cellular nitrogen compound metabolic process;GO:0006139//nucleobase-containing compound metabolic process;GO:0071840//cellular component organization or biogenesis;GO:0008150//bi…
Bra009352	403	938.667	30.81	67.9467	1.141	7.58067e-06	0.000208769	yes	AT5G08570 (E=6e-282) | pyruvate kinase, putative	-	GO:0016772//transferase activity, transferring phosphorus-containing groups;GO:0016740//transferase activity;GO:0003674//molecular_function;GO:0003824//catalytic activity;GO:0005488//binding;GO:0016301//kinase activity	GO:0046483//heterocycle metabolic process;GO:1901360//organic cyclic compound metabolic process;GO:0006725//cellular aromatic compound metabolic process;GO:0005975//carbohydrate metabolic process;GO:0009987//cellular process;GO:0044237//cellular metabolic process;GO:0044238//primary metabolic process;GO:0006807//nitrogen compound metabolic process;GO:0034641//cellular nitrogen compound metabolic …
Bra009353	145.667	60	14.9767	6.03333	-1.31169	1.20654e-05	0.00031802	yes	AT5G08580 (E=1e-189) | calcium-binding EF hand family protein	-	GO:0005488//binding;GO:0003674//molecular_function	-
Bra009365	682.333	1837.67	40.49	105.22	1.37777	8.87433e-07	3.02561e-05	yes	AT5G08730 (E=3e-124) | IBR domain-containing protein	-	GO:0003676//nucleic acid binding;GO:0016740//transferase activity;GO:1901363//heterocyclic compound binding;GO:0003674//molecular_function;GO:0097159//organic cyclic compound binding;GO:0003824//catalytic activity;GO:0005488//binding	GO:0019538//protein metabolic process;GO:0044238//primary metabolic process;GO:0071704//organic substance metabolic process;GO:0008150//biological_process;GO:0008152//metabolic process;GO:0044237//cellular metabolic process;GO:0009987//cellular process;GO:0044260//cellular macromolecule metabolic process;GO:0006464//cellular protein modification process;GO:0036211//protein modification process;GO…
Bra009369	13	133	1.21333	11.9933	3.30518	7.08179e-16	8.41022e-14	yes	AT5G08780 (E=3e-123) | histone H1/H5 family protein	GO:0005622//intracellular;GO:0043231//intracellular membrane-bounded organelle;GO:0005575//cellular_component;GO:0043229//intracellular organelle;GO:0043226//organelle;GO:0043227//membrane-bounded organelle;GO:0044464//cell part;GO:0005634//nucleus;GO:0005623//cell;GO:0044424//intracellular part	GO:0003677//DNA binding;GO:1901363//heterocyclic compound binding;GO:0097159//organic cyclic compound binding;GO:0003674//molecular_function;GO:0005488//binding;GO:0003676//nucleic acid binding	GO:0016043//cellular component organization;GO:0008150//biological_process;GO:0009987//cellular process;GO:0071840//cellular component organization or biogenesis
Bra009370	198.667	499	27.66	66.06	1.25598	1.43883e-06	4.64571e-05	yes	AT5G08790 (E=1e-144) ATAF2, anac081 | ATAF2; transcription activator	GO:0043227//membrane-bounded organelle;GO:0043229//intracellular organelle;GO:0043226//organelle;GO:0044464//cell part;GO:0005623//cell;GO:0005634//nucleus;GO:0005575//cellular_component;GO:0043231//intracellular membrane-bounded organelle;GO:0044424//intracellular part;GO:0005622//intracellular	GO:0003676//nucleic acid binding;GO:0003674//molecular_function;GO:1901363//heterocyclic compound binding;GO:0005488//binding;GO:0003677//DNA binding;GO:0097159//organic cyclic compound binding	GO:0044237//cellular metabolic process;GO:0006725//cellular aromatic compound metabolic process;GO:0009058//biosynthetic process;GO:0034641//cellular nitrogen compound metabolic process;GO:0009987//cellular process;GO:0046483//heterocycle metabolic process;GO:0008152//metabolic process;GO:1901360//organic cyclic compound metabolic process;GO:0044238//primary metabolic process;GO:0006807//nitrogen…
Bra009371	1.66667	21.6667	0.133333	1.7	3.67243	1.17536e-06	3.88295e-05	yes	AT5G09220 (E=3e-241) AAP2 | AAP2 (AMINO ACID PERMEASE 2); amino acid transmembrane transporter	GO:0016020//membrane;GO:0005575//cellular_component	-	-
Bra009375	0	4.33333	0.001	0.423333	8.72565	0.00132078	0.0175442	yes	AT5G09280 (E=4e-141) | pectate lyase family protein	-	GO:0003674//molecular_function;GO:0003824//catalytic activity;GO:0005488//binding	GO:0008152//metabolic process;GO:0009056//catabolic process;GO:0071704//organic substance metabolic process;GO:0044238//primary metabolic process;GO:0005975//carbohydrate metabolic process;GO:0008150//biological_process
Bra009376	0.61	9.33333	0.213333	3.11333	3.86728	7.71318e-05	0.00159796	yes	-	-	-	-
Bra009379	496.333	1511	43.0633	125.703	1.54549	1.43457e-10	9.48837e-09	yes	AT5G09330 (E=7e-138) anac082 | anac082 (Arabidopsis NAC domain containing protein 82); transcription factor	GO:0005575//cellular_component;GO:0043231//intracellular membrane-bounded organelle;GO:0043227//membrane-bounded organelle;GO:0005634//nucleus;GO:0043229//intracellular organelle;GO:0043226//organelle;GO:0005623//cell;GO:0044464//cell part;GO:0044424//intracellular part;GO:0005622//intracellular	GO:1901363//heterocyclic compound binding;GO:0005488//binding;GO:0003677//DNA binding;GO:0097159//organic cyclic compound binding;GO:0003674//molecular_function;GO:0003676//nucleic acid binding	GO:0044238//primary metabolic process;GO:0009058//biosynthetic process;GO:0034641//cellular nitrogen compound metabolic process;GO:0008150//biological_process;GO:0006139//nucleobase-containing compound metabolic process;GO:1901360//organic cyclic compound metabolic process;GO:0009987//cellular process;GO:0008152//metabolic process;GO:0044237//cellular metabolic process;GO:0046483//heterocycle met…
Bra009388	0	8	0.001	1.11667	10.125	0.000202222	0.00363545	yes	-	-	-	-
Bra009389	22.3333	54.6667	3.01	7.02333	1.22239	0.0023692	0.028294	yes	-	-	-	-
Bra009392	327	808.333	60.14	144.06	1.26027	9.43489e-09	4.7391e-07	yes	AT4G32210 (E=2e-079) SDH3-2 | SDH3-2; succinate dehydrogenase	-	GO:0003674//molecular_function;GO:0003824//catalytic activity	-
Bra009400	1.34667	74.14	0.0933333	4.85333	5.70044	1.22599e-13	1.17968e-11	yes	AT5G09760 (E=4e-240) | pectinesterase family protein	GO:0044464//cell part;GO:0005575//cellular_component;GO:0005623//cell;GO:0005618//cell wall;GO:0030312//external encapsulating structure;GO:0071944//cell periphery	GO:0003674//molecular_function;GO:0003824//catalytic activity;GO:0098772//molecular function regulator;GO:0016787//hydrolase activity;GO:0030234//enzyme regulator activity	GO:0071840//cellular component organization or biogenesis;GO:0005975//carbohydrate metabolic process;GO:0008150//biological_process;GO:0008152//metabolic process;GO:0016043//cellular component organization;GO:0071704//organic substance metabolic process;GO:0009987//cellular process;GO:0009056//catabolic process;GO:0044238//primary metabolic process
Bra009403	70.3333	27.6667	10.7367	4.03667	-1.41131	0.000164216	0.00305358	yes	AT5G09790 (E=7e-130) ATXR5, SDG15 | ATXR5; DNA binding / protein binding	GO:0005623//cell;GO:0009536//plastid;GO:0005575//cellular_component;GO:0043226//organelle;GO:0044464//cell part;GO:0043227//membrane-bounded organelle;GO:0005622//intracellular;GO:0044424//intracellular part;GO:0043229//intracellular organelle;GO:0043231//intracellular membrane-bounded organelle;GO:0044444//cytoplasmic part;GO:0005737//cytoplasm;GO:0005634//nucleus	GO:0005488//binding;GO:0016740//transferase activity;GO:0003824//catalytic activity;GO:0003674//molecular_function;GO:0005515//protein binding	GO:0008150//biological_process;GO:0044267//cellular protein metabolic process;GO:0009987//cellular process;GO:0036211//protein modification process;GO:0006725//cellular aromatic compound metabolic process;GO:0006139//nucleobase-containing compound metabolic process;GO:0044707//single-multicellular organism process;GO:0043170//macromolecule metabolic process;GO:0044260//cellular macromolecule meta…
Bra009409	47.6667	140	2.82333	7.82333	1.47038	2.1297e-05	0.000521343	yes	AT5G04940 (E=1e-273) SUVH1 | SUVH1 (SU(VAR)3-9 HOMOLOG 1); histone methyltransferase	GO:0043226//organelle;GO:0005622//intracellular;GO:0043227//membrane-bounded organelle;GO:0005623//cell;GO:0044424//intracellular part;GO:0005634//nucleus;GO:0044464//cell part;GO:0005575//cellular_component;GO:0043231//intracellular membrane-bounded organelle;GO:0043229//intracellular organelle	GO:0005488//binding;GO:0003674//molecular_function;GO:0005515//protein binding;GO:0003824//catalytic activity;GO:0016740//transferase activity	GO:0071840//cellular component organization or biogenesis;GO:0016043//cellular component organization;GO:0044237//cellular metabolic process;GO:0008150//biological_process;GO:0006464//cellular protein modification process;GO:0071704//organic substance metabolic process;GO:0043170//macromolecule metabolic process;GO:0043412//macromolecule modification;GO:0044267//cellular protein metabolic process…
Bra009419	5.33333	0	2.09667	0.001	-11.0339	0.00122269	0.0164741	yes	-	-	-	-
Bra009421	963	394	51.1033	20.28	-1.33336	1.57548e-09	8.92379e-08	yes	-	-	-	-
Bra009428	98.3333	33.3333	14.63	4.79	-1.61083	1.64453e-06	5.22228e-05	yes	AT5G04820 (E=2e-089) ATOFP13, OFP13 | OFP13 (ARABIDOPSIS THALIANA OVATE FAMILY PROTEIN 13)	-	-	GO:0009987//cellular process;GO:0071704//organic substance metabolic process;GO:0046483//heterocycle metabolic process;GO:0009058//biosynthetic process;GO:0006139//nucleobase-containing compound metabolic process;GO:0008150//biological_process;GO:0034641//cellular nitrogen compound metabolic process;GO:0006725//cellular aromatic compound metabolic process;GO:0044238//primary metabolic process;GO:…
Bra009435	168.333	15.6667	12.4833	1.10333	-3.50006	2.28865e-21	4.65689e-19	yes	AT5G04710 (E=1e-262) | aspartyl aminopeptidase, putative	GO:0005622//intracellular;GO:0043226//organelle;GO:0005575//cellular_component;GO:0043227//membrane-bounded organelle;GO:0009536//plastid;GO:0044444//cytoplasmic part;GO:0044464//cell part;GO:0005623//cell;GO:0043229//intracellular organelle;GO:0043231//intracellular membrane-bounded organelle;GO:0005737//cytoplasm;GO:0044424//intracellular part	GO:0003674//molecular_function;GO:0016787//hydrolase activity;GO:0003824//catalytic activity;GO:0005488//binding	GO:0008152//metabolic process;GO:0044238//primary metabolic process;GO:0071704//organic substance metabolic process;GO:0008150//biological_process;GO:0043170//macromolecule metabolic process;GO:0019538//protein metabolic process
Bra009471	129	27.6667	18.4967	4.19	-2.14224	4.36291e-05	0.000976033	yes	AT5G04270 (E=7e-119) | zinc ion binding	GO:0005575//cellular_component;GO:0016020//membrane	GO:0005488//binding;GO:0016740//transferase activity;GO:0003674//molecular_function;GO:0003824//catalytic activity	-
Bra009484	294	108.41	48.7667	17.6367	-1.46732	6.80732e-05	0.00143164	yes	AT5G04120 (E=3e-121) | phosphoglycerate/bisphosphoglycerate mutase family protein	-	GO:0003824//catalytic activity;GO:0003674//molecular_function	GO:0008150//biological_process;GO:0008152//metabolic process
Bra009513	201.667	831.667	21.9133	86.91	1.98771	3.11518e-18	4.6073e-16	yes	AT5G03740 (E=2e-031) HD2C, HDT3 | HD2C (HISTONE DEACETYLASE 2C); histone deacetylase/ nucleic acid binding / transcription repressor/ zinc ion binding	GO:0043233//organelle lumen;GO:0005730//nucleolus;GO:0005575//cellular_component;GO:0044422//organelle part;GO:0043228//non-membrane-bounded organelle;GO:0044464//cell part;GO:0005622//intracellular;GO:0043232//intracellular non-membrane-bounded organelle;GO:0044428//nuclear part;GO:0005634//nucleus;GO:0031981//nuclear lumen;GO:0043227//membrane-bounded organelle;GO:0043226//organelle;GO:0043231/…	GO:0005488//binding;GO:0003674//molecular_function	GO:0044238//primary metabolic process;GO:0036211//protein modification process;GO:0009987//cellular process;GO:0032501//multicellular organismal process;GO:0006464//cellular protein modification process;GO:0044707//single-multicellular organism process;GO:0044267//cellular protein metabolic process;GO:0009628//response to abiotic stimulus;GO:0044260//cellular macromolecule metabolic process;GO:00…
Bra009548	2239	1040	178.637	85.36	-1.0654	0.000594639	0.00905018	yes	AT5G03160 (E=8e-218) ATP58IPK | ATP58IPK (ARABIDOPSIS HOMOLOG OF MAMALLIAN P58IPK); binding / heat shock protein binding	GO:0005783//endoplasmic reticulum;GO:0043227//membrane-bounded organelle;GO:0044464//cell part;GO:0005737//cytoplasm;GO:0044444//cytoplasmic part;GO:0005622//intracellular;GO:0005886//plasma membrane;GO:0016020//membrane;GO:0005575//cellular_component;GO:0043229//intracellular organelle;GO:0005623//cell;GO:0071944//cell periphery;GO:0043231//intracellular membrane-bounded organelle;GO:0043226//or…	GO:0005515//protein binding;GO:0003674//molecular_function;GO:0005488//binding	GO:0009628//response to abiotic stimulus;GO:0008150//biological_process;GO:0050896//response to stimulus;GO:0009987//cellular process;GO:0006950//response to stress
Bra009576	163	398.667	12.1333	27.6367	1.18761	2.68393e-05	0.000641293	yes	AT5G02620 (E=1e-249) | ankyrin repeat family protein	GO:0012505//endomembrane system;GO:0043226//organelle;GO:0044444//cytoplasmic part;GO:0043227//membrane-bounded organelle;GO:0005783//endoplasmic reticulum;GO:0043229//intracellular organelle;GO:0071944//cell periphery;GO:0005623//cell;GO:0005622//intracellular;GO:0016020//membrane;GO:0044464//cell part;GO:0005886//plasma membrane;GO:0044424//intracellular part;GO:0005575//cellular_component;GO:0…	GO:0005488//binding;GO:0005515//protein binding;GO:0003674//molecular_function	-
Bra009590	0.333333	12	0.11	3.91	5.15159	1.26832e-05	0.000331842	yes	-	-	-	-
Bra009611	92.3333	32.6667	8.87	3.14333	-1.49664	5.17404e-05	0.00113057	yes	AT5G02130 (E=8e-152) NDP1 | NDP1 (RANDOM POTATO CDNA CLONE); binding	-	GO:0003674//molecular_function;GO:0005488//binding;GO:0005515//protein binding	-
Bra009630	6.33333	35	0.72	3.57667	2.31255	0.000261241	0.00449899	yes	-	-	-	-
Bra009656	102.333	10.3333	26.6533	2.53	-3.39711	1.4189e-15	1.6483e-13	yes	-	-	-	-
Bra009665	73	27.6667	4.02667	1.5	-1.42462	0.000164143	0.00305358	yes	-	-	-	-
Bra009679	83.6667	26.3333	20.3133	6.17333	-1.71831	6.09994e-06	0.000171388	yes	AT5G23395 (E=1e-049) | FUNCTIONS IN: molecular_function unknown; INVOLVED IN: biological_process unknown; LOCATED IN: chloroplast; CONTAINS InterPro DOMAIN/s: CHCH (InterPro:IPR010625); Has 224 Blast hits to 224 proteins in 106 species: Archae - 0; Bacteria - 0; Metazoa - 109; Fungi - 94; Plants - 20; Viruses - 0; Other Eukaryotes - 1 (source: NCBI BLink).	GO:0005777//peroxisome;GO:0005622//intracellular;GO:0043227//membrane-bounded organelle;GO:0042579//microbody;GO:0005575//cellular_component;GO:0043226//organelle;GO:0044444//cytoplasmic part;GO:0005737//cytoplasm;GO:0005739//mitochondrion;GO:0043231//intracellular membrane-bounded organelle;GO:0043229//intracellular organelle;GO:0044464//cell part;GO:0044424//intracellular part;GO:0005623//cell	-	GO:0016043//cellular component organization;GO:0051234//establishment of localization;GO:0008150//biological_process;GO:0006810//transport;GO:0009987//cellular process;GO:0071840//cellular component organization or biogenesis;GO:0051179//localization
Bra009681	10	1.66667	2.44667	0.353333	-2.79172	0.000475028	0.00750725	yes	AT5G23420 (E=6e-017) HMGB6 | HMGB6; transcription factor	-	-	GO:0009987//cellular process;GO:0016043//cellular component organization;GO:0071840//cellular component organization or biogenesis;GO:0008150//biological_process
Bra009682	0	11.2667	0.001	3.03667	11.5683	9.85632e-07	3.31791e-05	yes	AT3G24495 (E=3e-029) MSH7, MSH6-2, ATMSH7 | MSH7 (MUTS HOMOLOG 7); ATP binding / damaged DNA binding / mismatched DNA binding	-	GO:0016740//transferase activity;GO:0036094//small molecule binding;GO:0000166//nucleotide binding;GO:1901363//heterocyclic compound binding;GO:0003676//nucleic acid binding;GO:0003674//molecular_function;GO:1901265//nucleoside phosphate binding;GO:0005488//binding;GO:0003824//catalytic activity;GO:0097159//organic cyclic compound binding;GO:0003677//DNA binding	GO:0006950//response to stress;GO:0006807//nitrogen compound metabolic process;GO:1901360//organic cyclic compound metabolic process;GO:0050896//response to stimulus;GO:0071704//organic substance metabolic process;GO:0044237//cellular metabolic process;GO:0044260//cellular macromolecule metabolic process;GO:0044238//primary metabolic process;GO:0034641//cellular nitrogen compound metabolic proces…
Bra009683	347.333	922	14.9733	39.4867	1.39897	1.66427e-09	9.32749e-08	yes	AT5G23430 (E=0.0) | transducin family protein / WD-40 repeat family protein	GO:0044464//cell part;GO:0043226//organelle;GO:0005622//intracellular;GO:0005737//cytoplasm;GO:0005575//cellular_component;GO:0043232//intracellular non-membrane-bounded organelle;GO:0044424//intracellular part;GO:0005856//cytoskeleton;GO:0043228//non-membrane-bounded organelle;GO:0043229//intracellular organelle;GO:0005623//cell	GO:0003674//molecular_function;GO:0005515//protein binding;GO:0005488//binding	GO:0009987//cellular process;GO:0008150//biological_process
Bra009691	5.34	18	0.63	2.05	1.7022	0.00469827	0.0489533	yes	AT5G23530 (E=2e-162) AtCXE18 | AtCXE18 (Arabidopsis thaliana carboxyesterase 18); carboxylesterase	-	GO:0016787//hydrolase activity;GO:0003674//molecular_function;GO:0003824//catalytic activity	GO:0008152//metabolic process;GO:0008150//biological_process
Bra009697	463.667	179.047	19.7033	7.3	-1.43247	1.29014e-09	7.38618e-08	yes	AT5G23580 (E=5e-253) CDPK9, ATCDPK9, CPK12, ATCPK12 | CDPK9 (CALMODULIN-LIKE DOMAIN PROTEIN KINASE 9); ATP binding / calcium ion binding / calmodulin-dependent protein kinase/ kinase/ protein kinase/ protein serine/threonine kinase	-	GO:1901265//nucleoside phosphate binding;GO:0036094//small molecule binding;GO:0097159//organic cyclic compound binding;GO:1901363//heterocyclic compound binding;GO:0003674//molecular_function;GO:0003824//catalytic activity;GO:0005488//binding;GO:0016772//transferase activity, transferring phosphorus-containing groups;GO:0016740//transferase activity;GO:0000166//nucleotide binding;GO:0016301//kin…	GO:0008150//biological_process;GO:0043170//macromolecule metabolic process;GO:0044260//cellular macromolecule metabolic process;GO:0071704//organic substance metabolic process;GO:0036211//protein modification process;GO:0044267//cellular protein metabolic process;GO:0019538//protein metabolic process;GO:0008152//metabolic process;GO:0009987//cellular process;GO:0006464//cellular protein modificat…
Bra009700	126	463.667	17.3633	60.5433	1.80192	6.63564e-08	2.8569e-06	yes	AT5G23660 (E=1e-144) MTN3 | MTN3 (Arabidopsis homolog of Medicago truncatula MTN3)	GO:0071944//cell periphery;GO:0044464//cell part;GO:0016020//membrane;GO:0005886//plasma membrane;GO:0005623//cell;GO:0005575//cellular_component	-	GO:0008150//biological_process;GO:0006810//transport;GO:0051234//establishment of localization;GO:0051179//localization
Bra009714	88.6667	6	5.27	0.37	-3.83221	5.24484e-14	5.28554e-12	yes	AT5G23910 (E=4e-090) | ATP binding / microtubule motor	GO:0043232//intracellular non-membrane-bounded organelle;GO:0044424//intracellular part;GO:0005856//cytoskeleton;GO:0044464//cell part;GO:0043229//intracellular organelle;GO:0005623//cell;GO:0005575//cellular_component;GO:0043228//non-membrane-bounded organelle;GO:0005622//intracellular;GO:0043226//organelle	GO:0036094//small molecule binding;GO:0016462//pyrophosphatase activity;GO:0003676//nucleic acid binding;GO:0003824//catalytic activity;GO:1901265//nucleoside phosphate binding;GO:0005515//protein binding;GO:0003677//DNA binding;GO:0003674//molecular_function;GO:0097159//organic cyclic compound binding;GO:0005488//binding;GO:0003774//motor activity;GO:0017111//nucleoside-triphosphatase activity;G…	GO:0006950//response to stress;GO:0090304//nucleic acid metabolic process;GO:0044238//primary metabolic process;GO:0034641//cellular nitrogen compound metabolic process;GO:0046483//heterocycle metabolic process;GO:0050896//response to stimulus;GO:0008150//biological_process;GO:0009987//cellular process;GO:1901360//organic cyclic compound metabolic process;GO:0044237//cellular metabolic process;GO…
Bra009716	1787.84	556.333	152.18	44.4933	-1.77412	2.40832e-11	1.76459e-09	yes	AT5G23940 (E=7e-226) EMB3009 | EMB3009 (embryo defective 3009); transferase/ transferase, transferring acyl groups other than amino-acyl groups	-	GO:0003674//molecular_function;GO:0016740//transferase activity;GO:0003824//catalytic activity	-
Bra009722	54	19.6667	3.82333	1.30333	-1.55262	0.000436173	0.00697745	yes	AT5G24010 (E=8e-265) | protein kinase family protein	GO:0044464//cell part;GO:0005575//cellular_component;GO:0016020//membrane;GO:0005886//plasma membrane;GO:0071944//cell periphery;GO:0005623//cell	GO:0016772//transferase activity, transferring phosphorus-containing groups;GO:0016301//kinase activity;GO:0097159//organic cyclic compound binding;GO:0005488//binding;GO:1901363//heterocyclic compound binding;GO:0016740//transferase activity;GO:0003674//molecular_function;GO:1901265//nucleoside phosphate binding;GO:0036094//small molecule binding;GO:0000166//nucleotide binding;GO:0003824//cataly…	GO:0008152//metabolic process;GO:0043170//macromolecule metabolic process;GO:0044238//primary metabolic process;GO:0048856//anatomical structure development;GO:0043412//macromolecule modification;GO:0044237//cellular metabolic process;GO:0006464//cellular protein modification process;GO:0016043//cellular component organization;GO:0071840//cellular component organization or biogenesis;GO:0044260//…
Bra009726	18	2.33333	3.17	0.463333	-2.77436	0.000303792	0.00512404	yes	-	-	-	-
Bra009738	1	77	0.0766667	5.59333	6.18897	4.28437e-23	1.01384e-20	yes	AT5G24150 (E=3e-218) SQP1, SQE5 | SQP1; squalene monooxygenase	GO:0016020//membrane;GO:0005575//cellular_component	GO:0000166//nucleotide binding;GO:0036094//small molecule binding;GO:0097159//organic cyclic compound binding;GO:1901363//heterocyclic compound binding;GO:0003674//molecular_function;GO:0003824//catalytic activity;GO:0005488//binding;GO:1901265//nucleoside phosphate binding	GO:0008150//biological_process;GO:0008152//metabolic process
Bra009747	783	346.333	47.3533	19.98	-1.24491	1.63441e-07	6.4065e-06	yes	AT5G24300 (E=0.0) SSI1, SSI, ATSS1 | SSI1 (SUPPRESSOR OF SALICYLIC ACID INSENSITIVITY 1); starch synthase/ transferase, transferring glycosyl groups	GO:0044444//cytoplasmic part;GO:0043229//intracellular organelle;GO:0005622//intracellular;GO:0005737//cytoplasm;GO:0009536//plastid;GO:0043226//organelle;GO:0044424//intracellular part;GO:0043231//intracellular membrane-bounded organelle;GO:0044464//cell part;GO:0005623//cell;GO:0005575//cellular_component;GO:0043227//membrane-bounded organelle	GO:0003674//molecular_function;GO:0003824//catalytic activity;GO:0016740//transferase activity	GO:0005975//carbohydrate metabolic process;GO:0006629//lipid metabolic process;GO:0009058//biosynthetic process;GO:0044710//single-organism metabolic process;GO:0008152//metabolic process;GO:0009628//response to abiotic stimulus;GO:0009987//cellular process;GO:0071704//organic substance metabolic process;GO:0044238//primary metabolic process;GO:0050896//response to stimulus;GO:0006950//response t…
Bra009755	51	0	4.95333	0.001	-12.2742	2.27448e-17	3.13192e-15	yes	AT1G27540 (E=4e-092) | F-box family protein	-	GO:0003674//molecular_function;GO:0005515//protein binding;GO:0005488//binding	-
Bra009757	188	64	13.59	4.38	-1.63354	1.56157e-06	4.9886e-05	yes	-	-	-	-
Bra009762	30	0.333333	3.63667	0.0333333	-6.76951	1.08488e-13	1.05987e-11	yes	-	-	-	-
Bra009763	5221	1647.67	796.853	237.053	-1.7491	1.44734e-11	1.0803e-09	yes	AT5G24420 (E=2e-113) | glucosamine/galactosamine-6-phosphate isomerase-related	-	GO:0003824//catalytic activity;GO:0016787//hydrolase activity;GO:0003674//molecular_function	GO:1901360//organic cyclic compound metabolic process;GO:0044237//cellular metabolic process;GO:0006725//cellular aromatic compound metabolic process;GO:0009987//cellular process;GO:0044238//primary metabolic process;GO:0034641//cellular nitrogen compound metabolic process;GO:0006139//nucleobase-containing compound metabolic process;GO:0005975//carbohydrate metabolic process;GO:0071704//organic s…
Bra009765	15	84	1.03667	5.68667	2.45563	6.86403e-10	4.12177e-08	yes	AT5G24430 (E=3e-260) | calcium-dependent protein kinase, putative / CDPK, putative	-	GO:0005488//binding;GO:0097159//organic cyclic compound binding;GO:0016740//transferase activity;GO:0016301//kinase activity;GO:1901363//heterocyclic compound binding;GO:0016772//transferase activity, transferring phosphorus-containing groups;GO:0000166//nucleotide binding;GO:1901265//nucleoside phosphate binding;GO:0003674//molecular_function;GO:0003824//catalytic activity;GO:0036094//small mole…	GO:0071704//organic substance metabolic process;GO:0044238//primary metabolic process;GO:0009987//cellular process;GO:0044260//cellular macromolecule metabolic process;GO:0044267//cellular protein metabolic process;GO:0008152//metabolic process;GO:0006464//cellular protein modification process;GO:0043170//macromolecule metabolic process;GO:0043412//macromolecule modification;GO:0036211//protein m…
Bra009770	223.333	16.6667	25.96	1.86667	-3.79775	2.03026e-26	6.00542e-24	yes	AT5G24520 (E=1e-176) TTG1, TTG | TTG1 (TRANSPARENT TESTA GLABRA 1); DNA binding / nucleotide binding / protein binding	GO:0043227//membrane-bounded organelle;GO:0044464//cell part;GO:0043229//intracellular organelle;GO:0043226//organelle;GO:0005634//nucleus;GO:0005737//cytoplasm;GO:0044424//intracellular part;GO:0043231//intracellular membrane-bounded organelle;GO:0005575//cellular_component;GO:0005623//cell;GO:0005622//intracellular	GO:0003674//molecular_function;GO:1901363//heterocyclic compound binding;GO:0003676//nucleic acid binding;GO:0003677//DNA binding;GO:0005488//binding;GO:0097159//organic cyclic compound binding;GO:0005515//protein binding	GO:0008150//biological_process;GO:0044767//single-organism developmental process;GO:0044699//single-organism process;GO:0044763//single-organism cellular process;GO:0044707//single-multicellular organism process;GO:0007275//multicellular organism development;GO:0032501//multicellular organismal process;GO:0048869//cellular developmental process;GO:0030154//cell differentiation;GO:0009987//cellula…
Bra009771	1	12	0.0966667	1.06667	3.46395	5.08315e-05	0.00111452	yes	AT5G24530 (E=2e-169) DMR6 | DMR6 (DOWNY MILDEW RESISTANT 6); oxidoreductase/ oxidoreductase, acting on paired donors, with incorporation or reduction of molecular oxygen, 2-oxoglutarate as one donor, and incorporation of one atom each of oxygen into both donors	-	GO:0005488//binding;GO:0003824//catalytic activity;GO:0003674//molecular_function	GO:0008150//biological_process;GO:0008152//metabolic process
Bra009773	0	14.6667	0.001	1.80667	10.8191	4.23094e-09	2.23777e-07	yes	AT5G24580 (E=2e-074) | copper-binding family protein	-	GO:0003674//molecular_function;GO:0005488//binding	GO:0008150//biological_process;GO:0051179//localization;GO:0051234//establishment of localization;GO:0006810//transport
Bra009776	124.333	54.3333	32.7767	13.83	-1.24487	8.33243e-05	0.00170524	yes	-	-	-	-
Bra009777	486.333	61.6667	47.1167	5.85333	-3.00891	3.96887e-29	1.32073e-26	yes	-	-	-	-
Bra009778	103	30	10.15	2.9	-1.80735	2.77596e-06	8.35925e-05	yes	AT5G24630 (E=6e-046) BIN4 | BIN4 (brassinosteroid-insensitive4); double-stranded DNA binding	GO:0005634//nucleus;GO:0043226//organelle;GO:0005622//intracellular;GO:0043229//intracellular organelle;GO:0044464//cell part;GO:0043227//membrane-bounded organelle;GO:0005575//cellular_component;GO:0044424//intracellular part;GO:0005623//cell;GO:0043231//intracellular membrane-bounded organelle	GO:0003676//nucleic acid binding;GO:0003674//molecular_function;GO:1901363//heterocyclic compound binding;GO:0005488//binding;GO:0097159//organic cyclic compound binding;GO:0003677//DNA binding	GO:0048856//anatomical structure development;GO:0009058//biosynthetic process;GO:0034641//cellular nitrogen compound metabolic process;GO:0030154//cell differentiation;GO:0044707//single-multicellular organism process;GO:0006725//cellular aromatic compound metabolic process;GO:0044767//single-organism developmental process;GO:0006139//nucleobase-containing compound metabolic process;GO:0048869//c…
Bra009793	69.3333	27	9.23	3.64667	-1.33975	0.00187591	0.0233636	yes	AT5G24800 (E=1e-098) ATBZIP9, BZO2H2, BZIP9 | BZIP9 (BASIC LEUCINE ZIPPER 9); DNA binding / protein heterodimerization/ transcription factor	-	GO:0003700//transcription factor activity, sequence-specific DNA binding;GO:0005488//binding;GO:0003674//molecular_function;GO:0097159//organic cyclic compound binding;GO:0003676//nucleic acid binding;GO:1901363//heterocyclic compound binding;GO:0001071//nucleic acid binding transcription factor activity;GO:0003677//DNA binding	GO:0009987//cellular process;GO:0071704//organic substance metabolic process;GO:0009058//biosynthetic process;GO:1901360//organic cyclic compound metabolic process;GO:0046483//heterocycle metabolic process;GO:0044237//cellular metabolic process;GO:0034641//cellular nitrogen compound metabolic process;GO:0008152//metabolic process;GO:0006807//nitrogen compound metabolic process;GO:0006139//nucleob…
Bra009810	28	5.33333	2.20333	0.4	-2.46162	2.56247e-06	7.83338e-05	yes	AT5G25050 (E=2e-242) | integral membrane transporter family protein	GO:0016020//membrane;GO:0005575//cellular_component	-	GO:0051179//localization;GO:0051234//establishment of localization;GO:0006810//transport;GO:0008150//biological_process
Bra009816	28.3333	4	2.18333	0.286667	-2.92909	4.58765e-06	0.000131323	yes	-	-	GO:0003674//molecular_function;GO:0003824//catalytic activity	GO:0008150//biological_process;GO:0008152//metabolic process
Bra009817	361	0	27.9333	0.001	-14.7697	6.96958e-41	4.63854e-38	yes	AT5G25120 (E=2e-234) CYP71B11 | CYP71B11; electron carrier/ heme binding / iron ion binding / monooxygenase/ oxygen binding	-	GO:0003824//catalytic activity;GO:0005488//binding;GO:0003674//molecular_function	GO:0008152//metabolic process;GO:0008150//biological_process
Bra009826	1233.67	511.333	116.317	46.53	-1.32182	3.20934e-09	1.72893e-07	yes	AT5G25220 (E=4e-150) KNAT3 | KNAT3 (KNOTTED1-LIKE HOMEOBOX GENE 3); transcription activator/ transcription factor	GO:0043226//organelle;GO:0005634//nucleus;GO:0005829//cytosol;GO:0044424//intracellular part;GO:0043231//intracellular membrane-bounded organelle;GO:0005623//cell;GO:0005737//cytoplasm;GO:0005575//cellular_component;GO:0043227//membrane-bounded organelle;GO:0044464//cell part;GO:0005622//intracellular;GO:0044444//cytoplasmic part;GO:0043229//intracellular organelle	GO:1901363//heterocyclic compound binding;GO:0003677//DNA binding;GO:0005488//binding;GO:0001071//nucleic acid binding transcription factor activity;GO:0003676//nucleic acid binding;GO:0003674//molecular_function;GO:0003700//transcription factor activity, sequence-specific DNA binding;GO:0097159//organic cyclic compound binding	GO:0006807//nitrogen compound metabolic process;GO:0044707//single-multicellular organism process;GO:1901360//organic cyclic compound metabolic process;GO:0008150//biological_process;GO:0032502//developmental process;GO:0044767//single-organism developmental process;GO:0044237//cellular metabolic process;GO:0032501//multicellular organismal process;GO:0071704//organic substance metabolic process;…
Bra009830	558	131.667	20.8	4.71	-2.14278	1.25105e-18	1.93073e-16	yes	AT5G11110 (E=0.0) SPS1, ATSPS2F, KNS2 | ATSPS2F (SUCROSE PHOSPHATE SYNTHASE 2F); sucrose-phosphate synthase	-	GO:0016740//transferase activity;GO:0003824//catalytic activity;GO:0003674//molecular_function	GO:0071704//organic substance metabolic process;GO:0044238//primary metabolic process;GO:0008152//metabolic process;GO:0005975//carbohydrate metabolic process;GO:0009058//biosynthetic process;GO:0008150//biological_process;GO:0009987//cellular process
Bra009842	92.3333	38.6667	13.3867	5.21333	-1.36052	0.000231393	0.00406159	yes	AT5G25470 (E=3e-083) | DNA binding	GO:0005634//nucleus;GO:0043229//intracellular organelle;GO:0043231//intracellular membrane-bounded organelle;GO:0005623//cell;GO:0044424//intracellular part;GO:0005575//cellular_component;GO:0043226//organelle;GO:0043227//membrane-bounded organelle;GO:0044464//cell part;GO:0005622//intracellular	GO:0097159//organic cyclic compound binding;GO:0005488//binding;GO:1901363//heterocyclic compound binding;GO:0003674//molecular_function;GO:0003677//DNA binding;GO:0003676//nucleic acid binding	GO:0009987//cellular process;GO:0071704//organic substance metabolic process;GO:0044237//cellular metabolic process;GO:0009058//biosynthetic process;GO:0006807//nitrogen compound metabolic process;GO:1901360//organic cyclic compound metabolic process;GO:0006725//cellular aromatic compound metabolic process;GO:0044238//primary metabolic process;GO:0034641//cellular nitrogen compound metabolic proc…
Bra009852	117.667	54.6667	10.92	5.16	-1.08153	0.00250548	0.0295935	yes	AT5G25580 (E=5e-122) | FUNCTIONS IN: molecular_function unknown; INVOLVED IN: biological_process unknown; LOCATED IN: cellular_component unknown; EXPRESSED IN: 17 plant structures; EXPRESSED DURING: 8 growth stages; BEST Arabidopsis thaliana protein match is: aminoacyl-tRNA synthetase family (TAIR:AT1G18950.1); Has 138 Blast hits to 138 proteins in 63 species: Archae - 0; Bacteria - 4; Metazoa - …	-	-	GO:0071704//organic substance metabolic process;GO:0022414//reproductive process;GO:0044699//single-organism process;GO:0019222//regulation of metabolic process;GO:0044237//cellular metabolic process;GO:0016043//cellular component organization;GO:0044763//single-organism cellular process;GO:0048856//anatomical structure development;GO:0044260//cellular macromolecule metabolic process;GO:0060255//…
Bra009854	7.66667	28.6667	0.753333	2.89667	1.94303	0.00102163	0.0142209	yes	-	-	-	-
Bra009856	0.333333	9.66667	0.0333333	0.846667	4.66676	3.47159e-05	0.000799591	yes	AT5G25620 (E=2e-211) YUC6 | YUC6 (YUCCA6); FAD binding / NADP or NADPH binding / flavin-containing monooxygenase/ monooxygenase/ oxidoreductase	-	GO:0005488//binding;GO:0097159//organic cyclic compound binding;GO:0003824//catalytic activity;GO:0000166//nucleotide binding;GO:1901265//nucleoside phosphate binding;GO:0003674//molecular_function;GO:1901363//heterocyclic compound binding;GO:0036094//small molecule binding	GO:0008150//biological_process;GO:0008152//metabolic process
Bra009866	398	79	26.2733	4.87667	-2.42963	8.08179e-15	8.78167e-13	yes	AT5G25880 (E=0.0) ATNADP-ME3 | ATNADP-ME3 (NADP-malic enzyme 3); malate dehydrogenase (oxaloacetate-decarboxylating) (NADP+)/ malic enzyme/ oxidoreductase, acting on NADH or NADPH, NAD or NADP as acceptor	GO:0005829//cytosol;GO:0005575//cellular_component;GO:0044424//intracellular part;GO:0005737//cytoplasm;GO:0005622//intracellular;GO:0044444//cytoplasmic part;GO:0044464//cell part;GO:0005623//cell	GO:0097159//organic cyclic compound binding;GO:1901265//nucleoside phosphate binding;GO:0003824//catalytic activity;GO:0036094//small molecule binding;GO:0000166//nucleotide binding;GO:0003674//molecular_function;GO:0005488//binding;GO:1901363//heterocyclic compound binding	GO:0043170//macromolecule metabolic process;GO:0051704//multi-organism process;GO:0044238//primary metabolic process;GO:0044706//multi-multicellular organism process;GO:0071840//cellular component organization or biogenesis;GO:0009056//catabolic process;GO:0030154//cell differentiation;GO:0009653//anatomical structure morphogenesis;GO:0009058//biosynthetic process;GO:0019538//protein metabolic pr…
Bra009931	554.667	1332.67	34.0567	79.4233	1.22163	3.7105e-08	1.67423e-06	yes	AT5G27920 (E=4e-298) | F-box family protein	-	GO:0005488//binding;GO:0005515//protein binding;GO:0003674//molecular_function	-
Bra009945	304.333	147.333	33.41	16.7033	-1.00014	0.00291403	0.0335465	yes	AT5G27740 (E=8e-187) EMB2775 | EMB2775 (EMBRYO DEFECTIVE 2775); DNA binding / nucleoside-triphosphatase/ nucleotide binding	-	GO:0016787//hydrolase activity;GO:1901265//nucleoside phosphate binding;GO:0003824//catalytic activity;GO:0003674//molecular_function;GO:1901363//heterocyclic compound binding;GO:0097159//organic cyclic compound binding;GO:0003677//DNA binding;GO:0036094//small molecule binding;GO:0000166//nucleotide binding;GO:0003676//nucleic acid binding;GO:0005488//binding	GO:0009058//biosynthetic process;GO:0071704//organic substance metabolic process;GO:0006725//cellular aromatic compound metabolic process;GO:0043170//macromolecule metabolic process;GO:0044237//cellular metabolic process;GO:0044260//cellular macromolecule metabolic process;GO:0044238//primary metabolic process;GO:0006139//nucleobase-containing compound metabolic process;GO:0008150//biological_pro…
Bra009948	38	4.33333	1.6	0.19	-3.074	6.87422e-07	2.387e-05	yes	AT5G27680 (E=9e-168) RECQSIM | RECQSIM (Arabidopsis RecQ helicase sim); ATP binding / ATP-dependent helicase/ helicase/ nucleic acid binding	-	GO:0003676//nucleic acid binding;GO:1901265//nucleoside phosphate binding;GO:0097159//organic cyclic compound binding;GO:0000166//nucleotide binding;GO:0003824//catalytic activity;GO:0003674//molecular_function;GO:1901363//heterocyclic compound binding;GO:0005488//binding;GO:0036094//small molecule binding;GO:0016787//hydrolase activity	GO:1901360//organic cyclic compound metabolic process;GO:0007049//cell cycle;GO:0043170//macromolecule metabolic process;GO:0006725//cellular aromatic compound metabolic process;GO:0046483//heterocycle metabolic process;GO:0044237//cellular metabolic process;GO:0008152//metabolic process;GO:0006259//DNA metabolic process;GO:0044763//single-organism cellular process;GO:0006950//response to stress;…
Bra009951	11.3333	35.3333	0.633333	1.90667	1.59002	0.000541862	0.00838678	yes	AT5G27600 (E=0.0) LACS7, ATLACS7 | LACS7 (LONG-CHAIN ACYL-COA SYNTHETASE 7); long-chain-fatty-acid-CoA ligase/ protein binding	GO:0042579//microbody;GO:0005575//cellular_component;GO:0005623//cell;GO:0043227//membrane-bounded organelle;GO:0043226//organelle;GO:0005737//cytoplasm;GO:0043231//intracellular membrane-bounded organelle;GO:0005777//peroxisome;GO:0044464//cell part;GO:0005622//intracellular;GO:0044444//cytoplasmic part;GO:0043229//intracellular organelle;GO:0044424//intracellular part	GO:0003674//molecular_function;GO:0003824//catalytic activity	GO:0008150//biological_process;GO:0006725//cellular aromatic compound metabolic process;GO:0008152//metabolic process;GO:1901360//organic cyclic compound metabolic process;GO:0071840//cellular component organization or biogenesis;GO:0009607//response to biotic stimulus;GO:0009605//response to external stimulus;GO:0016043//cellular component organization;GO:0044763//single-organism cellular proces…
Bra009959	19.0667	0	2.16	0.001	-11.0768	9.18645e-11	6.21759e-09	yes	AT1G70580 (E=7e-082) AOAT2, GGT2 | AOAT2 (ALANINE-2-OXOGLUTARATE AMINOTRANSFERASE 2); L-alanine:2-oxoglutarate aminotransferase/ glycine:2-oxoglutarate aminotransferase	-	GO:0003824//catalytic activity;GO:0005488//binding;GO:0003674//molecular_function	GO:0008152//metabolic process;GO:0008150//biological_process
Bra009978	968	461.333	70.88	32.4267	-1.1282	7.53163e-07	2.58994e-05	yes	-	-	-	-
Bra009980	27.3333	8.66667	1.68333	0.553333	-1.6051	0.00231662	0.0278116	yes	AT5G27950 (E=1e-279) | kinesin motor protein-related	GO:0005623//cell;GO:0044464//cell part;GO:0043226//organelle;GO:0044424//intracellular part;GO:0043232//intracellular non-membrane-bounded organelle;GO:0005856//cytoskeleton;GO:0005575//cellular_component;GO:0043228//non-membrane-bounded organelle;GO:0005622//intracellular;GO:0043229//intracellular organelle	GO:1901363//heterocyclic compound binding;GO:1901265//nucleoside phosphate binding;GO:0097159//organic cyclic compound binding;GO:0003774//motor activity;GO:0016817//hydrolase activity, acting on acid anhydrides;GO:0036094//small molecule binding;GO:0017111//nucleoside-triphosphatase activity;GO:0016787//hydrolase activity;GO:0003674//molecular_function;GO:0000166//nucleotide binding;GO:0005515//…	GO:0050896//response to stimulus;GO:0006810//transport;GO:0008152//metabolic process;GO:0071840//cellular component organization or biogenesis;GO:0044699//single-organism process;GO:0051234//establishment of localization;GO:0016265//death;GO:0016043//cellular component organization;GO:0008150//biological_process;GO:0009987//cellular process;GO:0009058//biosynthetic process;GO:0006950//response to…
Bra010038	353.333	750.333	17.8133	35.98	1.01424	2.61903e-05	0.000628608	yes	AT5G49360 (E=0.0) BXL1, ATBXL1 | BXL1 (BETA-XYLOSIDASE 1); hydrolase, hydrolyzing O-glycosyl compounds	-	GO:0016787//hydrolase activity;GO:0003674//molecular_function;GO:0003824//catalytic activity	GO:0005975//carbohydrate metabolic process;GO:0071704//organic substance metabolic process;GO:0044238//primary metabolic process;GO:0008152//metabolic process;GO:0008150//biological_process
Bra010076	99	21.3333	19.0867	4.28667	-2.15464	2.73355e-06	8.2695e-05	yes	AT5G62360 (E=6e-064) | invertase/pectin methylesterase inhibitor family protein	-	GO:0003674//molecular_function;GO:0003824//catalytic activity;GO:0030234//enzyme regulator activity;GO:0098772//molecular function regulator;GO:0016787//hydrolase activity	GO:0008150//biological_process
Bra010105	87.3333	31.3333	35.5367	13.07	-1.44305	0.0015831	0.0202782	yes	-	-	-	-
Bra010126	117.333	36.3333	15.6267	4.79333	-1.70491	2.77492e-07	1.0344e-05	yes	AT5G62840 (E=2e-146) | phosphoglycerate/bisphosphoglycerate mutase family protein	-	-	GO:0044767//single-organism developmental process;GO:0048856//anatomical structure development;GO:0044238//primary metabolic process;GO:1901360//organic cyclic compound metabolic process;GO:0034641//cellular nitrogen compound metabolic process;GO:0044707//single-multicellular organism process;GO:0008150//biological_process;GO:0006807//nitrogen compound metabolic process;GO:0008152//metabolic proc…
Bra010127	1.66667	24	0.416667	5.91667	3.82782	2.70509e-08	1.25242e-06	yes	-	-	-	-
Bra010165	168	394	10.97	24.9367	1.18471	1.88052e-05	0.000465448	yes	AT1G32450 (E=0.0) NRT1.5 | NRT1.5 (NITRATE TRANSPORTER 1.5); nitrate transmembrane transporter/ transporter	GO:0016020//membrane;GO:0005575//cellular_component	GO:0003674//molecular_function;GO:0005215//transporter activity	GO:0051234//establishment of localization;GO:0006810//transport;GO:0051179//localization;GO:0008150//biological_process
Bra010178	1238.67	484.667	80.5667	30.1867	-1.41627	9.07978e-10	5.35479e-08	yes	AT1G32640 (E=5e-263) ATMYC2, RD22BP1, JAI1, JIN1, MYC2, ZBF1 | MYC2; DNA binding / transcription activator/ transcription factor	GO:0043231//intracellular membrane-bounded organelle;GO:0005575//cellular_component;GO:0005622//intracellular;GO:0043227//membrane-bounded organelle;GO:0044464//cell part;GO:0044424//intracellular part;GO:0043229//intracellular organelle;GO:0005623//cell;GO:0043226//organelle;GO:0005634//nucleus	GO:1901363//heterocyclic compound binding;GO:0097159//organic cyclic compound binding;GO:0003674//molecular_function;GO:0005488//binding;GO:0003677//DNA binding;GO:0001071//nucleic acid binding transcription factor activity;GO:0003700//transcription factor activity, sequence-specific DNA binding;GO:0003676//nucleic acid binding;GO:0005515//protein binding	GO:0008219//cell death;GO:0006950//response to stress;GO:0051179//localization;GO:0007154//cell communication;GO:0065007//biological regulation;GO:0006807//nitrogen compound metabolic process;GO:0050794//regulation of cellular process;GO:0006810//transport;GO:0051234//establishment of localization;GO:0044237//cellular metabolic process;GO:0009058//biosynthetic process;GO:0050896//response to stim…
Bra010274	41	14.3333	2.89	0.986667	-1.55043	0.00082326	0.011922	yes	-	-	-	-
Bra010319	69.3333	195	6.05333	16.8967	1.48094	0.00278335	0.0323452	yes	AT2G25150 (E=3e-159) | transferase family protein	-	GO:0016740//transferase activity;GO:0003824//catalytic activity;GO:0003674//molecular_function	-
Bra010350	57.3333	124.667	15.6367	31.91	1.02908	0.00217961	0.0264049	yes	AT4G28750 (E=4e-043) PSAE-1 | PSAE-1 (PSA E1 KNOCKOUT); catalytic	GO:0044464//cell part;GO:0005622//intracellular;GO:0005575//cellular_component;GO:0016020//membrane;GO:0044424//intracellular part;GO:0005623//cell;GO:0009579//thylakoid	-	GO:0008150//biological_process;GO:0008152//metabolic process;GO:0044237//cellular metabolic process;GO:0015979//photosynthesis;GO:0009987//cellular process
Bra010357	57	0	6.93667	0.001	-12.76	1.80341e-21	3.79025e-19	yes	-	-	-	-
Bra010439	386	142	15.5633	5.72667	-1.44238	0.000592536	0.00902335	yes	AT1G64280 (E=5e-190) NPR1, SAI1, NIM1, ATNPR1 | NPR1 (NONEXPRESSER OF PR GENES 1); protein binding / transcription activator	GO:0005622//intracellular;GO:0044424//intracellular part;GO:0005623//cell;GO:0005575//cellular_component;GO:0043229//intracellular organelle;GO:0043226//organelle;GO:0043231//intracellular membrane-bounded organelle;GO:0044464//cell part;GO:0005634//nucleus;GO:0043227//membrane-bounded organelle	GO:0005515//protein binding;GO:0003674//molecular_function;GO:0005488//binding	GO:0009987//cellular process;GO:0016043//cellular component organization;GO:0071840//cellular component organization or biogenesis;GO:0008150//biological_process
Bra010461	4.66667	19.3433	0.7	2.9	2.05063	0.000844451	0.0121884	yes	AT4G25480 (E=4e-046) DREB1A, CBF3, ATCBF3 | DREB1A (DEHYDRATION RESPONSE ELEMENT B1A); DNA binding / transcription activator/ transcription factor	GO:0043229//intracellular organelle;GO:0043231//intracellular membrane-bounded organelle;GO:0005622//intracellular;GO:0044464//cell part;GO:0043226//organelle;GO:0043227//membrane-bounded organelle;GO:0005623//cell;GO:0044424//intracellular part;GO:0005634//nucleus;GO:0005575//cellular_component	GO:0003677//DNA binding;GO:0003674//molecular_function;GO:0005488//binding;GO:0097159//organic cyclic compound binding;GO:0003676//nucleic acid binding;GO:0001071//nucleic acid binding transcription factor activity;GO:0003700//transcription factor activity, sequence-specific DNA binding;GO:1901363//heterocyclic compound binding	GO:0006807//nitrogen compound metabolic process;GO:0071704//organic substance metabolic process;GO:0008150//biological_process;GO:0044238//primary metabolic process;GO:0044237//cellular metabolic process;GO:0034641//cellular nitrogen compound metabolic process;GO:0006139//nucleobase-containing compound metabolic process;GO:0046483//heterocycle metabolic process;GO:0009987//cellular process;GO:000…
Bra010500	56.6667	173.333	2.81	8.51	1.59859	2.40391e-06	7.39128e-05	yes	AT4G24190 (E=8e-191) SHD, HSP90.7 | SHD (SHEPHERD); ATP binding / unfolded protein binding	-	GO:1901265//nucleoside phosphate binding;GO:0036094//small molecule binding;GO:0000166//nucleotide binding;GO:0097159//organic cyclic compound binding;GO:0005515//protein binding;GO:0003674//molecular_function;GO:1901363//heterocyclic compound binding;GO:0005488//binding	GO:0009987//cellular process;GO:0006950//response to stress;GO:0008150//biological_process;GO:0050896//response to stimulus
Bra010535	317.667	78.3333	39.9033	10.35	-1.94688	1.87183e-06	5.8798e-05	yes	AT4G35420 (E=1e-102) | dihydroflavonol 4-reductase family / dihydrokaempferol 4-reductase family	GO:0043227//membrane-bounded organelle;GO:0005575//cellular_component;GO:0005783//endoplasmic reticulum;GO:0044424//intracellular part;GO:0043231//intracellular membrane-bounded organelle;GO:0044464//cell part;GO:0005622//intracellular;GO:0043226//organelle;GO:0012505//endomembrane system;GO:0005623//cell;GO:0043229//intracellular organelle;GO:0044444//cytoplasmic part;GO:0005737//cytoplasm	GO:0003674//molecular_function;GO:0003824//catalytic activity;GO:0005488//binding	GO:0032501//multicellular organismal process;GO:0009653//anatomical structure morphogenesis;GO:0032502//developmental process;GO:0000003//reproduction;GO:0016043//cellular component organization;GO:0007275//multicellular organism development;GO:0044699//single-organism process;GO:0071840//cellular component organization or biogenesis;GO:0009987//cellular process;GO:0044767//single-organism develo…
Bra010568	34	124	3.25667	11.3467	1.8008	8.14611e-05	0.0016757	yes	AT4G36680 (E=1e-171) | pentatricopeptide (PPR) repeat-containing protein	GO:0044444//cytoplasmic part;GO:0043227//membrane-bounded organelle;GO:0043226//organelle;GO:0043229//intracellular organelle;GO:0044424//intracellular part;GO:0005622//intracellular;GO:0044464//cell part;GO:0005737//cytoplasm;GO:0043231//intracellular membrane-bounded organelle;GO:0005623//cell;GO:0005575//cellular_component;GO:0005739//mitochondrion	GO:0003674//molecular_function;GO:0005515//protein binding;GO:0005488//binding	GO:0051179//localization;GO:0008150//biological_process;GO:0016043//cellular component organization;GO:0009987//cellular process;GO:0006810//transport;GO:0051234//establishment of localization;GO:0071840//cellular component organization or biogenesis
Bra010577	118.667	269.333	14.04	30.6667	1.12713	1.82999e-05	0.000454949	yes	AT4G36870 (E=1e-137) BLH2, SAW1 | BLH2 (BEL1-LIKE HOMEODOMAIN 2); DNA binding / transcription factor	GO:0005623//cell;GO:0043227//membrane-bounded organelle;GO:0005575//cellular_component;GO:0043229//intracellular organelle;GO:0043231//intracellular membrane-bounded organelle;GO:0043226//organelle;GO:0044424//intracellular part;GO:0005622//intracellular;GO:0044464//cell part;GO:0005634//nucleus	GO:0003700//transcription factor activity, sequence-specific DNA binding;GO:0097159//organic cyclic compound binding;GO:0001071//nucleic acid binding transcription factor activity;GO:0005488//binding;GO:0003674//molecular_function;GO:1901363//heterocyclic compound binding;GO:0003677//DNA binding;GO:0003676//nucleic acid binding	GO:0008152//metabolic process;GO:0009058//biosynthetic process;GO:0006139//nucleobase-containing compound metabolic process;GO:1901360//organic cyclic compound metabolic process;GO:0071704//organic substance metabolic process;GO:0009987//cellular process;GO:0008150//biological_process;GO:0046483//heterocycle metabolic process;GO:0006725//cellular aromatic compound metabolic process;GO:0044237//ce…
Bra010590	22.3333	6.66667	0.88	0.276667	-1.66935	0.00449595	0.0472771	yes	AT2G14080 (E=3e-181) | disease resistance protein (TIR-NBS-LRR class), putative	-	GO:0005515//protein binding;GO:0005488//binding;GO:0036094//small molecule binding;GO:0003824//catalytic activity;GO:0000166//nucleotide binding;GO:0003674//molecular_function;GO:0097159//organic cyclic compound binding;GO:0016787//hydrolase activity;GO:1901363//heterocyclic compound binding;GO:1901265//nucleoside phosphate binding	GO:0007165//signal transduction;GO:0044699//single-organism process;GO:0023052//signaling;GO:0044700//single organism signaling;GO:0051716//cellular response to stimulus;GO:0007154//cell communication;GO:0050789//regulation of biological process;GO:0009987//cellular process;GO:0050896//response to stimulus;GO:0008150//biological_process;GO:0065007//biological regulation;GO:0044763//single-organis…
Bra010593	48	132.667	6.18	15.9967	1.37209	6.12117e-05	0.00130539	yes	AT4G37260 (E=3e-130) MYB73, ATMYB73 | MYB73 (MYB DOMAIN PROTEIN 73); DNA binding / transcription factor	-	GO:0003682//chromatin binding;GO:0044877//macromolecular complex binding;GO:0005488//binding;GO:0003677//DNA binding;GO:0003674//molecular_function;GO:0097159//organic cyclic compound binding;GO:0003676//nucleic acid binding;GO:1901363//heterocyclic compound binding	-
Bra010606	2.66667	22	0.226667	1.76667	2.96239	0.000128525	0.00247341	yes	AT4G37650 (E=1e-224) SHR, SGR7 | SHR (SHORT ROOT); protein binding / sequence-specific DNA binding / transcription factor	GO:0043226//organelle;GO:0043231//intracellular membrane-bounded organelle;GO:0043229//intracellular organelle;GO:0005634//nucleus;GO:0005622//intracellular;GO:0044424//intracellular part;GO:0005575//cellular_component;GO:0043227//membrane-bounded organelle;GO:0005623//cell;GO:0044464//cell part	GO:1901363//heterocyclic compound binding;GO:0003676//nucleic acid binding;GO:0003674//molecular_function;GO:0003700//transcription factor activity, sequence-specific DNA binding;GO:0003677//DNA binding;GO:0005488//binding;GO:0097159//organic cyclic compound binding;GO:0001071//nucleic acid binding transcription factor activity	GO:0044237//cellular metabolic process;GO:0071704//organic substance metabolic process;GO:0044767//single-organism developmental process;GO:0032501//multicellular organismal process;GO:0044707//single-multicellular organism process;GO:0008150//biological_process;GO:0046483//heterocycle metabolic process;GO:0032502//developmental process;GO:1901360//organic cyclic compound metabolic process;GO:000…
Bra010632	0.666667	20.6667	0.19	5.31667	4.80645	3.07861e-05	0.000722624	yes	-	-	-	-
Bra010653	617.543	189.813	53.0033	17.01	-1.6397	0.000526386	0.00817895	yes	-	-	-	-
Bra010657	6.33333	32.6667	0.97	4.79667	2.30598	3.76859e-06	0.000110248	yes	AT4G39780 (E=8e-066) | AP2 domain-containing transcription factor, putative	GO:0043226//organelle;GO:0005634//nucleus;GO:0043231//intracellular membrane-bounded organelle;GO:0005623//cell;GO:0043229//intracellular organelle;GO:0044464//cell part;GO:0005622//intracellular;GO:0043227//membrane-bounded organelle;GO:0044424//intracellular part;GO:0005575//cellular_component	GO:0097159//organic cyclic compound binding;GO:0003674//molecular_function;GO:0003700//transcription factor activity, sequence-specific DNA binding;GO:0003677//DNA binding;GO:0003676//nucleic acid binding;GO:0001071//nucleic acid binding transcription factor activity;GO:1901363//heterocyclic compound binding;GO:0005488//binding	GO:0071704//organic substance metabolic process;GO:0008152//metabolic process;GO:0034641//cellular nitrogen compound metabolic process;GO:0044238//primary metabolic process;GO:0008150//biological_process;GO:0046483//heterocycle metabolic process;GO:0006807//nitrogen compound metabolic process;GO:1901360//organic cyclic compound metabolic process;GO:0006725//cellular aromatic compound metabolic pr…
Bra010672	0.666667	23	0.05	1.45667	4.8646	2.30579e-05	0.000559308	yes	AT4G39640 (E=9e-223) GGT1 | GGT1 (GAMMA-GLUTAMYL TRANSPEPTIDASE 1); gamma-glutamyltransferase/ glutathione gamma-glutamylcysteinyltransferase	-	GO:0003824//catalytic activity;GO:0016740//transferase activity;GO:0003674//molecular_function	GO:0008150//biological_process;GO:0008152//metabolic process;GO:0009987//cellular process
Bra010697	1	7.33333	0.173333	1.24	2.83872	0.00293436	0.0337132	yes	-	-	-	-
Bra010717	94.1367	238.17	9.40667	21.38	1.18451	0.00282581	0.0327314	yes	AT4G38970 (E=3e-218) | fructose-bisphosphate aldolase, putative	-	GO:0003674//molecular_function;GO:0003824//catalytic activity	GO:0005975//carbohydrate metabolic process;GO:0046483//heterocycle metabolic process;GO:0071704//organic substance metabolic process;GO:0006139//nucleobase-containing compound metabolic process;GO:0008152//metabolic process;GO:0008150//biological_process;GO:0006091//generation of precursor metabolites and energy;GO:0009987//cellular process;GO:0034641//cellular nitrogen compound metabolic process…
Bra010724	4	719.667	0.183333	32.8133	7.48367	3.86269e-07	1.40704e-05	yes	AT1G73490 (E=1e-024) | RNA recognition motif (RRM)-containing protein	-	GO:0003674//molecular_function;GO:0003676//nucleic acid binding;GO:0000166//nucleotide binding;GO:1901265//nucleoside phosphate binding;GO:0016787//hydrolase activity;GO:0005488//binding;GO:1901363//heterocyclic compound binding;GO:0036094//small molecule binding;GO:0097159//organic cyclic compound binding;GO:0003824//catalytic activity	GO:0019538//protein metabolic process;GO:0008152//metabolic process;GO:0044238//primary metabolic process;GO:0071704//organic substance metabolic process;GO:0008150//biological_process;GO:0043170//macromolecule metabolic process
Bra010727	129.333	1531.67	10.8367	120.197	3.4714	3.32024e-08	1.51095e-06	yes	-	-	-	-
Bra010752	104	39.6667	12.6233	5.05667	-1.31983	0.00394542	0.0428855	yes	AT4G14220 (E=1e-041) RHF1A | RHF1A (RING-H2 GROUP F1A); protein binding / ubiquitin-protein ligase/ zinc ion binding	GO:0005575//cellular_component;GO:0016020//membrane	GO:0003824//catalytic activity;GO:0005488//binding;GO:0005515//protein binding;GO:0016740//transferase activity;GO:0003674//molecular_function	GO:0044763//single-organism cellular process;GO:0007154//cell communication;GO:0044699//single-organism process;GO:1901360//organic cyclic compound metabolic process;GO:0051179//localization;GO:0050789//regulation of biological process;GO:0050896//response to stimulus;GO:0044267//cellular protein metabolic process;GO:0008219//cell death;GO:0044260//cellular macromolecule metabolic process;GO:0051…
Bra010768	14.4	60.8133	1.88	7.55333	2.00638	0.000807089	0.0117464	yes	-	-	-	-
Bra010783	3.66667	26.3333	0.31	2.25	2.85958	0.000155864	0.00292208	yes	AT1G30270 (E=3e-200) CIPK23, SnRK3.23, ATCIPK23, LKS1 | CIPK23 (CBL-INTERACTING PROTEIN KINASE 23); kinase/ protein binding / protein serine/threonine kinase	-	GO:0003674//molecular_function;GO:1901265//nucleoside phosphate binding;GO:1901363//heterocyclic compound binding;GO:0016772//transferase activity, transferring phosphorus-containing groups;GO:0000166//nucleotide binding;GO:0036094//small molecule binding;GO:0016740//transferase activity;GO:0003824//catalytic activity;GO:0016301//kinase activity;GO:0097159//organic cyclic compound binding;GO:0005…	GO:0065007//biological regulation;GO:0043412//macromolecule modification;GO:0044763//single-organism cellular process;GO:0044260//cellular macromolecule metabolic process;GO:0043170//macromolecule metabolic process;GO:0009987//cellular process;GO:0050896//response to stimulus;GO:0051716//cellular response to stimulus;GO:0036211//protein modification process;GO:0050789//regulation of biological pr…
Bra010786	60	141	2.93	6.58	1.16719	0.00279351	0.0324043	yes	AT1G30240 (E=0.0) | unknown protein	-	GO:0003674//molecular_function;GO:0005488//binding	-
Bra010787	195	648	32.47	102.697	1.66121	8.31473e-05	0.0017038	yes	AT1G30230 (E=3e-091) | elongation factor 1-beta / EF-1-beta	GO:0044424//intracellular part;GO:0044464//cell part;GO:0005623//cell;GO:0005737//cytoplasm;GO:0005622//intracellular;GO:0005575//cellular_component	GO:0008135//translation factor activity, RNA binding;GO:0097159//organic cyclic compound binding;GO:0003674//molecular_function;GO:0005488//binding;GO:0003723//RNA binding;GO:1901363//heterocyclic compound binding;GO:0003676//nucleic acid binding	GO:0043604//amide biosynthetic process;GO:0034641//cellular nitrogen compound metabolic process;GO:1901564//organonitrogen compound metabolic process;GO:1901566//organonitrogen compound biosynthetic process;GO:0008152//metabolic process;GO:0044260//cellular macromolecule metabolic process;GO:0044249//cellular biosynthetic process;GO:0071704//organic substance metabolic process;GO:0034645//cellula…
Bra010788	88	14.6667	6.70333	1.13	-2.56856	7.36199e-09	3.76298e-07	yes	AT1G30220 (E=3e-248) ATINT2, INT2 | INT2 (INOSITOL TRANSPORTER 2); carbohydrate transmembrane transporter/ sugar:hydrogen symporter	GO:0005886//plasma membrane;GO:0016020//membrane;GO:0005575//cellular_component;GO:0005623//cell;GO:0044464//cell part;GO:0071944//cell periphery	GO:0003674//molecular_function;GO:0005215//transporter activity	GO:0051234//establishment of localization;GO:0009987//cellular process;GO:0051179//localization;GO:0006810//transport;GO:0008150//biological_process
Bra010791	122.667	305	13.39	31.8033	1.24802	0.00107378	0.014773	yes	-	-	-	-
Bra010820	12.6667	2	1.35333	0.193333	-2.80735	0.000141096	0.0026894	yes	AT1G29670 (E=2e-184) | GDSL-motif lipase/hydrolase family protein	-	GO:0003674//molecular_function;GO:0016787//hydrolase activity;GO:0003824//catalytic activity	GO:0008152//metabolic process;GO:0008150//biological_process;GO:0006629//lipid metabolic process;GO:0044710//single-organism metabolic process;GO:0071704//organic substance metabolic process;GO:0044238//primary metabolic process;GO:0044699//single-organism process
Bra010895	38	7.33333	12.0767	2.35667	-2.3574	5.27054e-05	0.00114773	yes	AT1G02250 (E=1e-007) anac005 | anac005 (Arabidopsis NAC domain containing protein 5); transcription factor	GO:0043231//intracellular membrane-bounded organelle;GO:0005634//nucleus;GO:0043227//membrane-bounded organelle;GO:0044464//cell part;GO:0043229//intracellular organelle;GO:0044424//intracellular part;GO:0043226//organelle;GO:0005622//intracellular;GO:0005575//cellular_component;GO:0005623//cell	GO:0003676//nucleic acid binding;GO:0005488//binding;GO:0003677//DNA binding;GO:0097159//organic cyclic compound binding;GO:0003674//molecular_function;GO:1901363//heterocyclic compound binding	GO:0009987//cellular process;GO:1901360//organic cyclic compound metabolic process;GO:0044238//primary metabolic process;GO:0009058//biosynthetic process;GO:0008152//metabolic process;GO:0008150//biological_process;GO:0006807//nitrogen compound metabolic process;GO:0046483//heterocycle metabolic process;GO:0071704//organic substance metabolic process;GO:0006139//nucleobase-containing compound met…
Bra010911	38.3333	83.6667	2.90667	6.03333	1.05359	0.00425313	0.045381	yes	AT1G27960 (E=8e-187) ECT9 | ECT9 (evolutionarily conserved C-terminal region 9)	-	GO:0003676//nucleic acid binding;GO:0003674//molecular_function;GO:0097159//organic cyclic compound binding;GO:0003723//RNA binding;GO:0005488//binding;GO:1901363//heterocyclic compound binding	GO:0009987//cellular process;GO:0036211//protein modification process;GO:0071704//organic substance metabolic process;GO:0044238//primary metabolic process;GO:0044260//cellular macromolecule metabolic process;GO:0043170//macromolecule metabolic process;GO:0043412//macromolecule modification;GO:0008152//metabolic process;GO:0006464//cellular protein modification process;GO:0008150//biological_proc…
Bra010958	10.3333	32	0.686667	2.00667	1.54712	0.00207149	0.0253062	yes	AT1G24280 (E=1e-265) G6PD3 | G6PD3 (GLUCOSE-6-PHOSPHATE DEHYDROGENASE 3); glucose-6-phosphate dehydrogenase	-	GO:1901363//heterocyclic compound binding;GO:0003824//catalytic activity;GO:1901265//nucleoside phosphate binding;GO:0000166//nucleotide binding;GO:0036094//small molecule binding;GO:0005488//binding;GO:0097159//organic cyclic compound binding;GO:0003674//molecular_function	GO:0044237//cellular metabolic process;GO:0071704//organic substance metabolic process;GO:0006725//cellular aromatic compound metabolic process;GO:0005975//carbohydrate metabolic process;GO:0046483//heterocycle metabolic process;GO:1901360//organic cyclic compound metabolic process;GO:0044238//primary metabolic process;GO:0006807//nitrogen compound metabolic process;GO:0006139//nucleobase-contain…
[truncated: 1,799 more rows]
