# Supplementary material for: Comparative transcriptome and flavonoids components analysis reveal the structural genes responsible for the yellow seed coat color of Brassica rapa L
Source: PeerJ. 2021 Mar 4;9:e10770. doi: 10.7717/peerj.10770 (PMC7937345; doi:10.7717/peerj.10770)
Supplement: Supplemental Information 12 [file peerj-09-10770-s012.xlsx]

## Sheet: Addition file 2
id	B147-14_count	B80-14_count	B147-14_fpkm	B80-14_fpkm	log2(FC)	Pvalue	FDR	significant	Description	GO Component	GO Function	GO Process
Bra000002	15.3333	62	1.52	6.17667	2.02276	0.000380221	0.00890628	yes	AT2G37460 (E=5e-184) | nodulin MtN21 family protein	GO:0016020//membrane;GO:0005575//cellular_component	GO:0003674//molecular_function;GO:0005215//transporter activity	GO:0008150//biological_process;GO:0009987//cellular process;GO:0051179//localization;GO:0006810//transport;GO:0051234//establishment of localization
Bra000014	7	0	0.406667	0.001	-8.6677	0.000503727	0.0111517	yes	AT2G37700 (E=2e-284) | catalytic/ iron ion binding / oxidoreductase	GO:0005575//cellular_component;GO:0016020//membrane	GO:0003824//catalytic activity;GO:0003674//molecular_function;GO:0005488//binding	GO:0071704//organic substance metabolic process;GO:0009987//cellular process;GO:0044710//single-organism metabolic process;GO:0006629//lipid metabolic process;GO:0044699//single-organism process;GO:0008152//metabolic process;GO:0009058//biosynthetic process;GO:0044238//primary metabolic process;GO:0008150//biological_process
Bra000046	24.3333	6.33333	2.99333	0.79	-1.92183	0.00300979	0.046967	yes	AT2G38250 (E=3e-073) | DNA-binding protein-related	GO:0043231//intracellular membrane-bounded organelle;GO:0005622//intracellular;GO:0044464//cell part;GO:0043227//membrane-bounded organelle;GO:0044424//intracellular part;GO:0005634//nucleus;GO:0043229//intracellular organelle;GO:0043226//organelle;GO:0005623//cell;GO:0005575//cellular_component	GO:0003677//DNA binding;GO:0003676//nucleic acid binding;GO:0003674//molecular_function;GO:1901363//heterocyclic compound binding;GO:0044877//macromolecular complex binding;GO:0003682//chromatin binding;GO:0005488//binding;GO:0001071//nucleic acid binding transcription factor activity;GO:0097159//organic cyclic compound binding;GO:0003700//transcription factor activity, sequence-specific DNA bind…	GO:0009058//biosynthetic process;GO:0044237//cellular metabolic process;GO:0006139//nucleobase-containing compound metabolic process;GO:0006725//cellular aromatic compound metabolic process;GO:0046483//heterocycle metabolic process;GO:0071704//organic substance metabolic process;GO:0008152//metabolic process;GO:0008150//biological_process;GO:0006807//nitrogen compound metabolic process;GO:0044238…
Bra000090	851	372	98.9233	42.7333	-1.21095	0.0012582	0.0235406	yes	AT2G38750 (E=9e-152) ANNAT4 | ANNAT4 (ANNEXIN ARABIDOPSIS 4); calcium ion binding / calcium-dependent phospholipid binding	-	GO:0003674//molecular_function;GO:0005488//binding;GO:0008289//lipid binding	-
Bra000124	4.33333	27.3333	0.256667	1.79333	2.80468	0.00219243	0.0361971	yes	AT2G39210 (E=3e-292) | nodulin family protein	GO:0016020//membrane;GO:0005575//cellular_component	-	GO:0051179//localization;GO:0051234//establishment of localization;GO:0009987//cellular process;GO:0006810//transport;GO:0008150//biological_process
Bra000195	948.667	335.333	105.767	36.9633	-1.51672	0.000962072	0.0189654	yes	AT2G40620 (E=3e-085) | bZIP transcription factor family protein	-	GO:0005488//binding;GO:0003677//DNA binding;GO:0003674//molecular_function;GO:0003700//transcription factor activity, sequence-specific DNA binding;GO:1901363//heterocyclic compound binding;GO:0097159//organic cyclic compound binding;GO:0003676//nucleic acid binding;GO:0001071//nucleic acid binding transcription factor activity	GO:0008152//metabolic process;GO:0006725//cellular aromatic compound metabolic process;GO:0046483//heterocycle metabolic process;GO:0034641//cellular nitrogen compound metabolic process;GO:0009987//cellular process;GO:0044238//primary metabolic process;GO:0006139//nucleobase-containing compound metabolic process;GO:0044237//cellular metabolic process;GO:0008150//biological_process;GO:1901360//org…
Bra000332	27.3333	102	2.61333	9.71	1.89358	0.000247939	0.00626871	yes	AT2G43870 (E=1e-209) | polygalacturonase, putative / pectinase, putative	GO:0005575//cellular_component;GO:0005576//extracellular region	GO:0003824//catalytic activity;GO:0016787//hydrolase activity;GO:0003674//molecular_function	GO:0009987//cellular process;GO:0044238//primary metabolic process;GO:0005975//carbohydrate metabolic process;GO:0016043//cellular component organization;GO:0071704//organic substance metabolic process;GO:0008152//metabolic process;GO:0071840//cellular component organization or biogenesis;GO:0008150//biological_process
Bra000364	767.333	349.667	149.277	66.79	-1.16028	0.00203423	0.0341904	yes	AT2G44790 (E=2e-032) UCC2 | UCC2 (UCLACYANIN 2); copper ion binding / electron carrier	-	GO:0005488//binding;GO:0003674//molecular_function	-
Bra000406	222.333	82	22.5833	8.33333	-1.43829	0.000800046	0.016215	yes	-	-	-	-
Bra000584	17.3833	75.3333	1.29333	5.54333	2.09966	0.000403794	0.00936023	yes	AT2G21050 (E=2e-259) | amino acid permease, putative	GO:0005575//cellular_component;GO:0016020//membrane	-	-
Bra000615	6803.33	15675	679.147	1625.8	1.25935	0.000364964	0.00862979	yes	AT5G50260 (E=4e-183) | cysteine proteinase, putative	GO:0005773//vacuole;GO:0044464//cell part;GO:0044444//cytoplasmic part;GO:0044424//intracellular part;GO:0005737//cytoplasm;GO:0043226//organelle;GO:0071944//cell periphery;GO:0043227//membrane-bounded organelle;GO:0030312//external encapsulating structure;GO:0005618//cell wall;GO:0005575//cellular_component;GO:0005623//cell;GO:0043229//intracellular organelle;GO:0043231//intracellular membrane-b…	GO:0003674//molecular_function;GO:0003824//catalytic activity;GO:0016787//hydrolase activity	GO:0030154//cell differentiation;GO:0009791//post-embryonic development;GO:0009987//cellular process;GO:0007275//multicellular organism development;GO:0032502//developmental process;GO:0003006//developmental process involved in reproduction;GO:0009908//flower development;GO:0044702//single organism reproductive process;GO:0048608//reproductive structure development;GO:0008219//cell death;GO:00905…
Bra000630	907	85.6667	132.47	11.7233	-3.49821	2.72769e-09	2.18815e-07	yes	AT2G23580 (E=4e-112) ATMES4, MES4, ABE4 | MES4 (METHYL ESTERASE 4); hydrolase/ hydrolase, acting on ester bonds / methyl salicylate esterase	-	GO:0003824//catalytic activity;GO:0003674//molecular_function;GO:0016787//hydrolase activity	GO:0009607//response to biotic stimulus;GO:0006950//response to stress;GO:0009987//cellular process;GO:0008150//biological_process;GO:0008152//metabolic process;GO:0009605//response to external stimulus;GO:0050896//response to stimulus
Bra000631	70.6667	2.66667	9.58	0.38	-4.65595	1.82247e-08	1.26517e-06	yes	-	-	-	-
Bra000638	1.33333	12.6667	0.12	1.17	3.2854	0.000725649	0.0150739	yes	AT4G08150 (E=9e-163) KNAT1, BP, BP1 | KNAT1 (KNOTTED-LIKE FROM ARABIDOPSIS THALIANA); transcription factor	GO:0043226//organelle;GO:0043231//intracellular membrane-bounded organelle;GO:0005623//cell;GO:0005622//intracellular;GO:0044464//cell part;GO:0043227//membrane-bounded organelle;GO:0044424//intracellular part;GO:0005634//nucleus;GO:0005575//cellular_component;GO:0043229//intracellular organelle	GO:0003674//molecular_function;GO:0003677//DNA binding;GO:0005488//binding;GO:0003700//transcription factor activity, sequence-specific DNA binding;GO:0003676//nucleic acid binding;GO:1901363//heterocyclic compound binding;GO:0097159//organic cyclic compound binding;GO:0001071//nucleic acid binding transcription factor activity	GO:0022414//reproductive process;GO:0090567//reproductive shoot system development;GO:0032502//developmental process;GO:0048856//anatomical structure development;GO:0000003//reproduction;GO:0034641//cellular nitrogen compound metabolic process;GO:0044699//single-organism process;GO:0006725//cellular aromatic compound metabolic process;GO:0044707//single-multicellular organism process;GO:0046483//…
Bra000639	1509	677.667	71.5833	31.66	-1.17696	7.33617e-05	0.00222752	yes	AT4G08180 (E=0.0) ORP1C | ORP1C (OSBP(OXYSTEROL BINDING PROTEIN)-RELATED PROTEIN 1C); oxysterol binding / phosphoinositide binding	-	GO:0003674//molecular_function;GO:0005488//binding;GO:0008289//lipid binding	-
Bra000668	63.3333	6.66667	7.07	0.786667	-3.16789	9.2827e-07	4.59734e-05	yes	AT4G38940 (E=1e-055) | kelch repeat-containing F-box family protein	-	GO:0005488//binding;GO:0003674//molecular_function;GO:0005515//protein binding	-
Bra000688	1089	516	112.143	52.5367	-1.09395	0.000235078	0.00600901	yes	AT4G09670 (E=7e-189) | oxidoreductase family protein	-	GO:0003824//catalytic activity;GO:0003674//molecular_function	GO:0008150//biological_process;GO:0008152//metabolic process
Bra000732	8.66667	0	0.91	0.001	-9.82972	5.47329e-05	0.00173994	yes	AT4G11050 (E=9e-165) AtGH9C3 | AtGH9C3 (Arabidopsis thaliana glycosyl hydrolase 9C3); carbohydrate binding / catalytic/ hydrolase, hydrolyzing O-glycosyl compounds	-	GO:0003674//molecular_function;GO:0005488//binding;GO:0030246//carbohydrate binding;GO:0016787//hydrolase activity;GO:0003824//catalytic activity	GO:0009987//cellular process;GO:0044238//primary metabolic process;GO:0005975//carbohydrate metabolic process;GO:0008150//biological_process;GO:0008152//metabolic process;GO:0071704//organic substance metabolic process;GO:0009056//catabolic process
Bra000735	60.6667	0	4.36333	0.001	-12.0912	9.82938e-17	1.98352e-14	yes	AT1G64840 (E=4e-113) | F-box family protein	-	GO:0005515//protein binding;GO:0003674//molecular_function;GO:0005488//binding	-
Bra000755	448.333	95	59.77	12.5867	-2.24753	7.01671e-09	5.2648e-07	yes	AT4G11910 (E=5e-129) | INVOLVED IN: biological_process unknown; LOCATED IN: chloroplast; BEST Arabidopsis thaliana protein match is: NYE1 (NON-YELLOWING 1) (TAIR:AT4G22920.1); Has 130 Blast hits to 128 proteins in 45 species: Archae - 0; Bacteria - 50; Metazoa - 0; Fungi - 0; Plants - 78; Viruses - 0; Other Eukaryotes - 2 (source: NCBI BLink).	GO:0043229//intracellular organelle;GO:0044464//cell part;GO:0043227//membrane-bounded organelle;GO:0009536//plastid;GO:0009579//thylakoid;GO:0005623//cell;GO:0005737//cytoplasm;GO:0005575//cellular_component;GO:0043226//organelle;GO:0044444//cytoplasmic part;GO:0016020//membrane;GO:0044424//intracellular part;GO:0043231//intracellular membrane-bounded organelle;GO:0005622//intracellular	-	GO:0008150//biological_process;GO:0009987//cellular process;GO:0009056//catabolic process;GO:0008152//metabolic process
Bra000758	175	0.333333	5.08667	0.01	-8.99058	2.26622e-25	8.87075e-23	yes	AT4G12020 (E=2e-189) WRKY19, ATWRKY19, MAPKKK11 | WRKY19; transcription factor	-	GO:0000166//nucleotide binding;GO:0003674//molecular_function;GO:0097159//organic cyclic compound binding;GO:1901265//nucleoside phosphate binding;GO:0036094//small molecule binding;GO:1901363//heterocyclic compound binding;GO:0005515//protein binding;GO:0005488//binding	GO:0006950//response to stress;GO:0008150//biological_process;GO:0050896//response to stimulus
Bra000785	190.667	448.667	21.6733	49.57	1.19355	0.00109934	0.0211215	yes	AT4G04020 (E=1e-129) FIB | FIB (FIBRILLIN); structural molecule	GO:0005575//cellular_component;GO:0044424//intracellular part;GO:0005623//cell;GO:0043231//intracellular membrane-bounded organelle;GO:0009536//plastid;GO:0044464//cell part;GO:0005622//intracellular;GO:0043226//organelle;GO:0043229//intracellular organelle;GO:0044444//cytoplasmic part;GO:0005737//cytoplasm;GO:0043227//membrane-bounded organelle	GO:0005198//structural molecule activity;GO:0003674//molecular_function	-
Bra000840	26.6667	124.333	3.27667	15.0833	2.20265	0.000494162	0.0109889	yes	AT4G03210 (E=4e-157) XTH9 | XTH9 (XYLOGLUCAN ENDOTRANSGLUCOSYLASE/HYDROLASE 9); hydrolase, acting on glycosyl bonds / xyloglucan:xyloglucosyl transferase	GO:0005575//cellular_component;GO:0071944//cell periphery;GO:0005576//extracellular region;GO:0030312//external encapsulating structure;GO:0005623//cell;GO:0005618//cell wall;GO:0044464//cell part	GO:0016787//hydrolase activity;GO:0003824//catalytic activity;GO:0016740//transferase activity;GO:0003674//molecular_function	GO:0071840//cellular component organization or biogenesis;GO:0008152//metabolic process;GO:0071704//organic substance metabolic process;GO:0005975//carbohydrate metabolic process;GO:0016043//cellular component organization;GO:0044238//primary metabolic process;GO:0008150//biological_process;GO:0009987//cellular process
Bra000843	5853.67	2412.67	494.617	199.633	-1.30896	2.0023e-05	0.000718815	yes	AT1G65670 (E=1e-182) CYP702A1 | CYP702A1; electron carrier/ heme binding / iron ion binding / monooxygenase/ oxygen binding	-	GO:0005488//binding;GO:0003824//catalytic activity;GO:0003674//molecular_function	GO:0008150//biological_process;GO:0009056//catabolic process;GO:0008152//metabolic process;GO:0009058//biosynthetic process;GO:0009987//cellular process
Bra000927	19.3333	88.3333	3.16333	14.2733	2.1738	4.09718e-05	0.00135553	yes	-	-	-	-
Bra001014	48.3333	12.3333	9.13333	2.37	-1.94625	0.00142365	0.0258898	yes	AT3G16510 (E=2e-041) | C2 domain-containing protein	-	GO:0003674//molecular_function;GO:0005488//binding;GO:0005515//protein binding	-
Bra001029	34	3.33333	3.57667	0.35	-3.35319	6.23225e-07	3.22419e-05	yes	AT4G38940 (E=1e-074) | kelch repeat-containing F-box family protein	-	GO:0005488//binding;GO:0005515//protein binding;GO:0003674//molecular_function	-
Bra001044	213	91	15.8767	6.82	-1.21906	0.0013114	0.0242271	yes	AT3G02400 (E=9e-044) | forkhead-associated domain-containing protein / FHA domain-containing protein / AT hook motif-containing protein	-	GO:0003674//molecular_function;GO:0005515//protein binding;GO:0005488//binding	-
Bra001055	10.6667	56	1.84	9.26333	2.33183	0.000308545	0.00752576	yes	AT3G02580 (E=1e-056) STE1, DWF7, BUL1 | STE1 (STEROL 1); C-5 sterol desaturase	-	GO:0005488//binding;GO:0003674//molecular_function;GO:0003824//catalytic activity	GO:0006629//lipid metabolic process;GO:0044699//single-organism process;GO:0009987//cellular process;GO:0008150//biological_process;GO:0044710//single-organism metabolic process;GO:0008152//metabolic process;GO:0071704//organic substance metabolic process;GO:0009058//biosynthetic process;GO:0044238//primary metabolic process
Bra001090	528.333	83	24.4067	3.88667	-2.65067	1.21014e-11	1.35573e-09	yes	AT3G03780 (E=3e-241) ATMS2 | AtMS2; 5-methyltetrahydropteroyltriglutamate-homocysteine S-methyltransferase/ methionine synthase	GO:0005622//intracellular;GO:0043229//intracellular organelle;GO:0071944//cell periphery;GO:0005886//plasma membrane;GO:0009536//plastid;GO:0005623//cell;GO:0005829//cytosol;GO:0005575//cellular_component;GO:0016020//membrane;GO:0044424//intracellular part;GO:0043226//organelle;GO:0044444//cytoplasmic part;GO:0043227//membrane-bounded organelle;GO:0005576//extracellular region;GO:0043231//intrace…	GO:0003674//molecular_function;GO:0016740//transferase activity;GO:0005488//binding;GO:0003824//catalytic activity	GO:0008152//metabolic process;GO:0009987//cellular process;GO:0008150//biological_process;GO:0009058//biosynthetic process
Bra001099	2489.33	240	640.717	62.52	-3.3573	9.40439e-26	3.72609e-23	yes	AT3G04280 (E=1e-051) ARR22 | ARR22 (ARABIDOPSIS RESPONSE REGULATOR 22); phosphohistidine phosphatase/ transcription regulator/ two-component response regulator	-	GO:0003674//molecular_function;GO:0004871//signal transducer activity	GO:0071704//organic substance metabolic process;GO:0034641//cellular nitrogen compound metabolic process;GO:0023052//signaling;GO:0008150//biological_process;GO:0006139//nucleobase-containing compound metabolic process;GO:0050789//regulation of biological process;GO:0006725//cellular aromatic compound metabolic process;GO:0044238//primary metabolic process;GO:0050896//response to stimulus;GO:0044…
Bra001144	0.666667	59.3333	0.0733333	6.89667	6.55529	2.59415e-06	0.000114203	yes	AT3G05290 (E=3e-138) PNC1 | PNC1 (PEROXISOMAL ADENINE NUCLEOTIDE CARRIER 1); ADP transmembrane transporter/ ATP transmembrane transporter/ binding	GO:0042579//microbody;GO:0044464//cell part;GO:0005575//cellular_component;GO:0016020//membrane;GO:0005623//cell;GO:0043227//membrane-bounded organelle;GO:0043229//intracellular organelle;GO:0043231//intracellular membrane-bounded organelle;GO:0005777//peroxisome;GO:0044424//intracellular part;GO:0043226//organelle;GO:0005737//cytoplasm;GO:0005622//intracellular;GO:0044444//cytoplasmic part	GO:0003674//molecular_function;GO:0005215//transporter activity	GO:0019748//secondary metabolic process;GO:0071704//organic substance metabolic process;GO:0009056//catabolic process;GO:0044707//single-multicellular organism process;GO:0007275//multicellular organism development;GO:0050896//response to stimulus;GO:0006629//lipid metabolic process;GO:0044238//primary metabolic process;GO:0008150//biological_process;GO:0044767//single-organism developmental proc…
Bra001283	604.667	1232.31	42.1867	85.38	1.01711	0.000808956	0.0163752	yes	AT3G08040 (E=3e-196) FRD3, MAN1 | FRD3 (FERRIC REDUCTASE DEFECTIVE 3); antiporter/ transporter	GO:0016020//membrane;GO:0005575//cellular_component	GO:0003674//molecular_function;GO:0005215//transporter activity	GO:0008150//biological_process;GO:0051234//establishment of localization;GO:0006810//transport;GO:0051179//localization;GO:0009987//cellular process
Bra001324	3124.33	1400	360.727	159.197	-1.1801	6.75585e-05	0.00208048	yes	AT3G09200 (E=7e-147) | 60S acidic ribosomal protein P0 (RPP0B)	GO:0005575//cellular_component;GO:0005840//ribosome;GO:0044444//cytoplasmic part;GO:0043232//intracellular non-membrane-bounded organelle;GO:0044424//intracellular part;GO:0005737//cytoplasm;GO:0043226//organelle;GO:0005622//intracellular;GO:0043228//non-membrane-bounded organelle;GO:0032991//macromolecular complex;GO:0030529//intracellular ribonucleoprotein complex;GO:0043229//intracellular orga…	GO:0005198//structural molecule activity;GO:0003674//molecular_function	GO:0006412//translation;GO:0009059//macromolecule biosynthetic process;GO:1901576//organic substance biosynthetic process;GO:0019538//protein metabolic process;GO:1901566//organonitrogen compound biosynthetic process;GO:0006807//nitrogen compound metabolic process;GO:0043170//macromolecule metabolic process;GO:0044267//cellular protein metabolic process;GO:0010467//gene expression;GO:0044260//cel…
Bra001333	38.6667	7.66667	3.64667	0.733333	-2.31404	0.000114976	0.00329696	yes	AT3G09010 (E=2e-162) | protein kinase family protein	-	GO:0005488//binding;GO:0036094//small molecule binding;GO:0016301//kinase activity;GO:0003674//molecular_function;GO:1901265//nucleoside phosphate binding;GO:1901363//heterocyclic compound binding;GO:0097159//organic cyclic compound binding;GO:0003824//catalytic activity;GO:0016772//transferase activity, transferring phosphorus-containing groups;GO:0016740//transferase activity;GO:0000166//nucleo…	GO:0044260//cellular macromolecule metabolic process;GO:0036211//protein modification process;GO:0019538//protein metabolic process;GO:0006464//cellular protein modification process;GO:0008152//metabolic process;GO:0071704//organic substance metabolic process;GO:0044267//cellular protein metabolic process;GO:0043170//macromolecule metabolic process;GO:0008150//biological_process;GO:0043412//macro…
Bra001341	354	1194.67	27.8767	97.6033	1.80787	1.53555e-05	0.000572117	yes	AT3G08860 (E=2e-115) | alanine--glyoxylate aminotransferase, putative / beta-alanine-pyruvate aminotransferase, putative / AGT, putative	-	GO:0016740//transferase activity;GO:0003824//catalytic activity;GO:0003674//molecular_function;GO:0005488//binding	GO:0016043//cellular component organization;GO:0008150//biological_process;GO:0044707//single-multicellular organism process;GO:0009838//abscission;GO:0032502//developmental process;GO:0071840//cellular component organization or biogenesis;GO:0008152//metabolic process;GO:0007275//multicellular organism development;GO:0044767//single-organism developmental process;GO:0044699//single-organism proc…
Bra001402	153	40.6667	11.3433	3.05667	-1.89181	8.75863e-06	0.000343671	yes	-	-	-	-
Bra001405	498	2374	45.2233	222.833	2.30083	0.00224894	0.0369579	yes	AT3G11480 (E=8e-185) BSMT1, ATBSMT1 | BSMT1; S-adenosylmethionine-dependent methyltransferase	-	GO:0016740//transferase activity;GO:0003824//catalytic activity;GO:0003674//molecular_function	GO:0008152//metabolic process;GO:0008150//biological_process
Bra001440	9	33.6667	0.78	2.90333	1.89616	0.00150668	0.0270295	yes	AT3G12240 (E=6e-160) SCPL15 | SCPL15 (serine carboxypeptidase-like 15); serine-type carboxypeptidase	-	GO:0003824//catalytic activity;GO:0003674//molecular_function;GO:0016787//hydrolase activity	GO:0019538//protein metabolic process;GO:0071704//organic substance metabolic process;GO:0044238//primary metabolic process;GO:0008150//biological_process;GO:0008152//metabolic process;GO:0043170//macromolecule metabolic process
Bra001457	4739	1746.67	305.11	106.137	-1.52341	0.000416229	0.00957711	yes	AT3G12580 (E=2e-260) HSP70 | HSP70 (heat shock protein 70); ATP binding	-	GO:0036094//small molecule binding;GO:0003674//molecular_function;GO:0000166//nucleotide binding;GO:1901265//nucleoside phosphate binding;GO:1901363//heterocyclic compound binding;GO:0097159//organic cyclic compound binding;GO:0005488//binding	-
Bra001460	285	764.667	28.7167	75.2433	1.38968	1.83987e-05	0.000668628	yes	AT3G12610 (E=7e-184) DRT100 | DRT100 (DNA-DAMAGE REPAIR/TOLERATION 100); nucleotide binding / protein binding	-	GO:0005488//binding;GO:0003674//molecular_function;GO:0005515//protein binding	-
Bra001480	3	16.3333	0.386667	2.21	2.51488	0.00219258	0.0361971	yes	AT3G12977 (E=3e-118) | DNA binding	GO:0005634//nucleus;GO:0005575//cellular_component;GO:0043229//intracellular organelle;GO:0043227//membrane-bounded organelle;GO:0005622//intracellular;GO:0043226//organelle;GO:0044464//cell part;GO:0044424//intracellular part;GO:0043231//intracellular membrane-bounded organelle;GO:0005623//cell	GO:0003676//nucleic acid binding;GO:0003674//molecular_function;GO:0005488//binding;GO:1901363//heterocyclic compound binding;GO:0003677//DNA binding;GO:0097159//organic cyclic compound binding	GO:0071704//organic substance metabolic process;GO:0009058//biosynthetic process;GO:0034641//cellular nitrogen compound metabolic process;GO:0006807//nitrogen compound metabolic process;GO:1901360//organic cyclic compound metabolic process;GO:0006139//nucleobase-containing compound metabolic process;GO:0009987//cellular process;GO:0008152//metabolic process;GO:0008150//biological_process;GO:00067…
Bra001530	547	1195	49.0833	105.8	1.10803	0.000234382	0.00599593	yes	AT3G13920 (E=2e-232) EIF4A1, RH4, TIF4A1 | EIF4A1 (EUKARYOTIC TRANSLATION INITIATION FACTOR 4A1); ATP-dependent helicase/ translation initiation factor	-	GO:0036094//small molecule binding;GO:0097159//organic cyclic compound binding;GO:0003824//catalytic activity;GO:0005488//binding;GO:1901363//heterocyclic compound binding;GO:0003676//nucleic acid binding;GO:1901265//nucleoside phosphate binding;GO:0000166//nucleotide binding;GO:0016787//hydrolase activity;GO:0003674//molecular_function	-
Bra001546	1508	670.333	95.9133	43.0767	-1.15482	0.000766206	0.0156835	yes	AT1G53840 (E=6e-213) ATPME1 | ATPME1; pectinesterase	GO:0005623//cell;GO:0044464//cell part;GO:0030312//external encapsulating structure;GO:0005575//cellular_component;GO:0005618//cell wall;GO:0071944//cell periphery	GO:0098772//molecular function regulator;GO:0016787//hydrolase activity;GO:0030234//enzyme regulator activity;GO:0003674//molecular_function;GO:0003824//catalytic activity	GO:0071704//organic substance metabolic process;GO:0044238//primary metabolic process;GO:0016043//cellular component organization;GO:0008152//metabolic process;GO:0005975//carbohydrate metabolic process;GO:0009056//catabolic process;GO:0071840//cellular component organization or biogenesis;GO:0008150//biological_process;GO:0009987//cellular process
Bra001547	20.3333	1.33333	1.3	0.0833333	-3.96347	1.50767e-05	0.000562374	yes	AT3G14310 (E=1e-291) ATPME3 | ATPME3; pectinesterase	GO:0005623//cell;GO:0005575//cellular_component;GO:0044464//cell part;GO:0071944//cell periphery;GO:0030312//external encapsulating structure;GO:0005618//cell wall	GO:0098772//molecular function regulator;GO:0030234//enzyme regulator activity;GO:0003824//catalytic activity;GO:0016787//hydrolase activity;GO:0003674//molecular_function	GO:0071704//organic substance metabolic process;GO:0009987//cellular process;GO:0071840//cellular component organization or biogenesis;GO:0005975//carbohydrate metabolic process;GO:0016043//cellular component organization;GO:0008152//metabolic process;GO:0044238//primary metabolic process;GO:0008150//biological_process;GO:0009056//catabolic process
Bra001578	168.333	417.333	16.89	41.3367	1.29125	0.000264221	0.00659314	yes	-	-	-	-
Bra001579	36.3333	97	3.33333	8.75	1.39232	0.00226007	0.0371194	yes	-	-	-	-
Bra001586	67	180	7.86667	21.73	1.46586	0.00178928	0.0309541	yes	AT3G15170 (E=6e-124) CUC1, anac054, ATNAC1 | CUC1 (CUP-SHAPED COTYLEDON1); transcription factor	GO:0043227//membrane-bounded organelle;GO:0043226//organelle;GO:0043229//intracellular organelle;GO:0043231//intracellular membrane-bounded organelle;GO:0005623//cell;GO:0044424//intracellular part;GO:0005622//intracellular;GO:0044464//cell part;GO:0005575//cellular_component;GO:0005634//nucleus	GO:0003676//nucleic acid binding;GO:1901363//heterocyclic compound binding;GO:0005488//binding;GO:0003677//DNA binding;GO:0097159//organic cyclic compound binding;GO:0003674//molecular_function	GO:0034641//cellular nitrogen compound metabolic process;GO:0006807//nitrogen compound metabolic process;GO:0044237//cellular metabolic process;GO:0008152//metabolic process;GO:0006139//nucleobase-containing compound metabolic process;GO:0008150//biological_process;GO:1901360//organic cyclic compound metabolic process;GO:0071704//organic substance metabolic process;GO:0006725//cellular aromatic c…
Bra001598	0.666667	11.3333	0.123333	2.24667	4.18715	0.000534434	0.0117557	yes	AT3G15540 (E=1e-102) IAA19, MSG2 | IAA19 (INDOLE-3-ACETIC ACID INDUCIBLE 19); transcription factor	GO:0005622//intracellular;GO:0005634//nucleus;GO:0005575//cellular_component;GO:0044464//cell part;GO:0043226//organelle;GO:0044424//intracellular part;GO:0043231//intracellular membrane-bounded organelle;GO:0043227//membrane-bounded organelle;GO:0005623//cell;GO:0043229//intracellular organelle	GO:0003674//molecular_function;GO:0005488//binding;GO:0005515//protein binding	GO:0044700//single organism signaling;GO:0008150//biological_process;GO:0009987//cellular process;GO:0044237//cellular metabolic process;GO:0009058//biosynthetic process;GO:0044238//primary metabolic process;GO:0065007//biological regulation;GO:0051716//cellular response to stimulus;GO:0050789//regulation of biological process;GO:0006725//cellular aromatic compound metabolic process;GO:0023052//s…
Bra001599	0	8.33333	0.001	0.786667	9.61961	0.00232398	0.0379606	yes	-	-	-	-
Bra001600	26.3333	93	8.63	30.08	1.80137	0.000165452	0.00447449	yes	AT3G15630 (E=6e-029) | unknown protein	-	-	GO:0008150//biological_process
Bra001617	32.14	175.667	1.79667	9.64	2.42371	3.93621e-06	0.000166299	yes	AT3G15990 (E=0.0) SULTR3;4 | SULTR3;4 (SULFATE TRANSPORTER 3;4); sulfate transmembrane transporter	GO:0005575//cellular_component;GO:0016020//membrane	GO:0005215//transporter activity;GO:0003674//molecular_function	GO:0009987//cellular process;GO:0051234//establishment of localization;GO:0008150//biological_process;GO:0051179//localization;GO:0006810//transport
Bra001624	0	61.6667	0.001	8.38	13.0327	5.49626e-17	1.13738e-14	yes	AT1G52300 (E=6e-049) | 60S ribosomal protein L37 (RPL37B)	GO:0030529//intracellular ribonucleoprotein complex;GO:0043226//organelle;GO:0005622//intracellular;GO:0044424//intracellular part;GO:0005737//cytoplasm;GO:0044444//cytoplasmic part;GO:0005575//cellular_component;GO:0005623//cell;GO:0043228//non-membrane-bounded organelle;GO:0032991//macromolecular complex;GO:0044464//cell part;GO:0043229//intracellular organelle;GO:1990904//ribonucleoprotein com…	GO:0005198//structural molecule activity;GO:0003674//molecular_function	GO:1901566//organonitrogen compound biosynthetic process;GO:0071704//organic substance metabolic process;GO:0008150//biological_process;GO:1901576//organic substance biosynthetic process;GO:1901564//organonitrogen compound metabolic process;GO:0006807//nitrogen compound metabolic process;GO:0006518//peptide metabolic process;GO:0009059//macromolecule biosynthetic process;GO:0019538//protein metab…
Bra001636	645.333	289.667	180.767	80.1167	-1.17395	0.000127129	0.0035514	yes	-	-	-	-
Bra001665	105.667	11.3333	8.53667	1	-3.09367	2.57142e-06	0.000113355	yes	AT3G17510 (E=3e-221) CIPK1, SnRK3.16 | CIPK1 (CBL-INTERACTING PROTEIN KINASE 1); kinase/ protein binding	-	GO:1901363//heterocyclic compound binding;GO:0003824//catalytic activity;GO:0016772//transferase activity, transferring phosphorus-containing groups;GO:0005488//binding;GO:0097159//organic cyclic compound binding;GO:0000166//nucleotide binding;GO:0036094//small molecule binding;GO:0016301//kinase activity;GO:0016740//transferase activity;GO:0003674//molecular_function;GO:1901265//nucleoside phosp…	GO:0006464//cellular protein modification process;GO:0044238//primary metabolic process;GO:0019538//protein metabolic process;GO:0044699//single-organism process;GO:0050896//response to stimulus;GO:0043170//macromolecule metabolic process;GO:0044267//cellular protein metabolic process;GO:0007165//signal transduction;GO:0043412//macromolecule modification;GO:0008152//metabolic process;GO:0008150//…
Bra001677	13.6667	0.88	2.19	0.146667	-3.90032	0.000187542	0.0049984	yes	AT3G17650 (E=8e-128) YSL5, PDE321 | YSL5 (YELLOW STRIPE LIKE 5); oligopeptide transporter	-	-	GO:0009987//cellular process;GO:0051234//establishment of localization;GO:0051179//localization;GO:0006810//transport;GO:0008150//biological_process
Bra001692	165	346.667	10.3833	21.4367	1.04581	0.0015318	0.0273894	yes	AT3G17970 (E=7e-267) atToc64-III | atToc64-III (Arabidopsis thaliana translocon at the outer membrane of chloroplasts 64-III); binding / carbon-nitrogen ligase, with glutamine as amido-N-donor	GO:0005622//intracellular;GO:0005623//cell;GO:0044444//cytoplasmic part;GO:0043226//organelle;GO:0044464//cell part;GO:0005737//cytoplasm;GO:0043231//intracellular membrane-bounded organelle;GO:0043229//intracellular organelle;GO:0009536//plastid;GO:0044424//intracellular part;GO:0005575//cellular_component;GO:0043227//membrane-bounded organelle;GO:0016020//membrane	GO:0003674//molecular_function;GO:0005488//binding;GO:0003824//catalytic activity;GO:0005515//protein binding	GO:0046483//heterocycle metabolic process;GO:0071704//organic substance metabolic process;GO:0006725//cellular aromatic compound metabolic process;GO:0008152//metabolic process;GO:0034641//cellular nitrogen compound metabolic process;GO:0009058//biosynthetic process;GO:0006807//nitrogen compound metabolic process;GO:0006139//nucleobase-containing compound metabolic process;GO:0044237//cellular me…
Bra001697	1	11	0.106667	1.14333	3.42206	0.00275668	0.0437526	yes	-	-	-	-
Bra001703	63.3333	9	9.28	1.33667	-2.79549	1.04479e-06	5.08907e-05	yes	-	-	-	-
Bra001728	116.333	24.3333	9.51333	1.97667	-2.26688	2.93061e-06	0.00012746	yes	AT3G18950 (E=5e-208) | transducin family protein / WD-40 repeat family protein	-	GO:0003674//molecular_function;GO:0005515//protein binding;GO:0005488//binding	-
Bra001734	49.3333	467.667	2.68333	25.6967	3.25948	1.85507e-08	1.28506e-06	yes	AT3G19100 (E=2e-289) | calcium-dependent protein kinase, putative / CDPK, putative	-	GO:0097159//organic cyclic compound binding;GO:1901265//nucleoside phosphate binding;GO:1901363//heterocyclic compound binding;GO:0036094//small molecule binding;GO:0003824//catalytic activity;GO:0003674//molecular_function;GO:0000166//nucleotide binding;GO:0016740//transferase activity;GO:0016301//kinase activity;GO:0005488//binding;GO:0016772//transferase activity, transferring phosphorus-conta…	GO:0044237//cellular metabolic process;GO:0009987//cellular process;GO:0043412//macromolecule modification;GO:0071704//organic substance metabolic process;GO:0008152//metabolic process;GO:0036211//protein modification process;GO:0044267//cellular protein metabolic process;GO:0044238//primary metabolic process;GO:0006464//cellular protein modification process;GO:0019538//protein metabolic process;…
Bra001752	27.6667	155	3.78333	21.5533	2.51018	1.94127e-06	8.85814e-05	yes	AT3G19580 (E=7e-078) AZF2 | AZF2 (ARABIDOPSIS ZINC-FINGER PROTEIN 2); DNA binding / nucleic acid binding / transcription factor/ transcription repressor/ zinc ion binding	-	GO:0005488//binding;GO:0003674//molecular_function	-
Bra001799	0	5.66667	0.001	1.42	10.4717	0.000480927	0.0107313	yes	-	-	-	-
Bra001811	6.66667	105.667	0.576667	9.31333	4.01349	5.13726e-12	6.00376e-10	yes	AT3G21110 (E=6e-216) PUR7, PURC, ATPURC | PUR7 (PURIN 7); phosphoribosylaminoimidazolesuccinocarboxamide synthase	-	GO:0003674//molecular_function;GO:0036094//small molecule binding;GO:0003824//catalytic activity;GO:0097159//organic cyclic compound binding;GO:0005488//binding;GO:0000166//nucleotide binding;GO:1901363//heterocyclic compound binding;GO:1901265//nucleoside phosphate binding	GO:0046483//heterocycle metabolic process;GO:0006807//nitrogen compound metabolic process;GO:0044238//primary metabolic process;GO:0009987//cellular process;GO:0044237//cellular metabolic process;GO:0034641//cellular nitrogen compound metabolic process;GO:0009058//biosynthetic process;GO:0006725//cellular aromatic compound metabolic process;GO:0006139//nucleobase-containing compound metabolic pro…
Bra001814	1	39.3333	0.09	3.77	5.3885	2.96226e-09	2.35884e-07	yes	AT3G21140 (E=2e-167) | FMN binding	-	GO:0000166//nucleotide binding;GO:0003824//catalytic activity;GO:0003674//molecular_function;GO:0097159//organic cyclic compound binding;GO:0005488//binding;GO:1901363//heterocyclic compound binding;GO:1901265//nucleoside phosphate binding;GO:0036094//small molecule binding	GO:0008152//metabolic process;GO:0008150//biological_process
Bra001817	731.333	3.33333	71.74	0.306667	-7.86996	7.63302e-56	1.65326e-52	yes	AT3G21220 (E=2e-135) ATMKK5, ATMAP2K_ALPHA, MAP2K_A, MKK5, ATMEK5, MEK5 | ATMKK5 (ARABIDOPSIS THALIANA MITOGEN-ACTIVATED PROTEIN KINASE KINASE 5); MAP kinase kinase/ kinase	GO:0043226//organelle;GO:0005737//cytoplasm;GO:0016020//membrane;GO:0044464//cell part;GO:0044424//intracellular part;GO:0043227//membrane-bounded organelle;GO:0005622//intracellular;GO:0043229//intracellular organelle;GO:0005739//mitochondrion;GO:0044444//cytoplasmic part;GO:0005575//cellular_component;GO:0043231//intracellular membrane-bounded organelle;GO:0005623//cell	GO:0016301//kinase activity;GO:0016740//transferase activity;GO:0000166//nucleotide binding;GO:0097159//organic cyclic compound binding;GO:0036094//small molecule binding;GO:0003674//molecular_function;GO:0016787//hydrolase activity;GO:0003824//catalytic activity;GO:1901363//heterocyclic compound binding;GO:0016772//transferase activity, transferring phosphorus-containing groups;GO:0005488//bindi…	GO:0008150//biological_process;GO:0043170//macromolecule metabolic process;GO:0036211//protein modification process;GO:0044260//cellular macromolecule metabolic process;GO:0044267//cellular protein metabolic process;GO:1901360//organic cyclic compound metabolic process;GO:0006810//transport;GO:0071704//organic substance metabolic process;GO:0051234//establishment of localization;GO:0006464//cellu…
Bra001818	240.667	93.6667	27.4567	10.5333	-1.38219	0.000478768	0.0106979	yes	AT3G21220 (E=1e-162) ATMKK5, ATMAP2K_ALPHA, MAP2K_A, MKK5, ATMEK5, MEK5 | ATMKK5 (ARABIDOPSIS THALIANA MITOGEN-ACTIVATED PROTEIN KINASE KINASE 5); MAP kinase kinase/ kinase	-	GO:0016301//kinase activity;GO:0036094//small molecule binding;GO:1901363//heterocyclic compound binding;GO:0016740//transferase activity;GO:1901265//nucleoside phosphate binding;GO:0003824//catalytic activity;GO:0000166//nucleotide binding;GO:0005488//binding;GO:0097159//organic cyclic compound binding;GO:0003674//molecular_function;GO:0016772//transferase activity, transferring phosphorus-conta…	GO:0043412//macromolecule modification;GO:0044237//cellular metabolic process;GO:0008150//biological_process;GO:0044267//cellular protein metabolic process;GO:0009987//cellular process;GO:0044260//cellular macromolecule metabolic process;GO:0019538//protein metabolic process;GO:0044238//primary metabolic process;GO:0006464//cellular protein modification process;GO:0071704//organic substance metab…
Bra001842	813.333	206.333	140.737	35.4667	-1.98846	1.53571e-10	1.45462e-08	yes	-	-	-	-
Bra001845	127.667	11	9.86333	0.846667	-3.54221	8.06864e-08	4.97423e-06	yes	AT3G21760 (E=1e-224) | UDP-glucoronosyl/UDP-glucosyl transferase family protein	-	GO:0003674//molecular_function;GO:0003824//catalytic activity;GO:0016740//transferase activity	GO:0008150//biological_process;GO:0008152//metabolic process
Bra001888	45.6667	14.6667	7.66	2.43333	-1.65441	0.00290797	0.0457426	yes	AT3G22845 (E=3e-107) | emp24/gp25L/p24 protein-related	GO:0016020//membrane;GO:0005575//cellular_component	-	GO:0006810//transport;GO:0008150//biological_process;GO:0051179//localization;GO:0051234//establishment of localization
Bra001903	2.33333	18.6667	0.116667	0.923333	2.98446	0.000798421	0.0161922	yes	AT3G16030 (E=1e-191) CES101 | CES101 (CALLUS EXPRESSION OF RBCS 101); ATP binding / carbohydrate binding / kinase/ protein kinase/ protein serine/threonine kinase/ protein tyrosine kinase/ sugar binding	-	GO:0003824//catalytic activity;GO:0097159//organic cyclic compound binding;GO:0005488//binding;GO:0016740//transferase activity;GO:0016772//transferase activity, transferring phosphorus-containing groups;GO:1901265//nucleoside phosphate binding;GO:0000166//nucleotide binding;GO:0036094//small molecule binding;GO:1901363//heterocyclic compound binding;GO:0003674//molecular_function;GO:0016301//kin…	GO:0019538//protein metabolic process;GO:0006464//cellular protein modification process;GO:0044260//cellular macromolecule metabolic process;GO:0036211//protein modification process;GO:0071704//organic substance metabolic process;GO:0009987//cellular process;GO:0008150//biological_process;GO:0043170//macromolecule metabolic process;GO:0008152//metabolic process;GO:0043412//macromolecule modificat…
Bra001905	71.6667	21.3333	26.13	7.77	-1.74972	0.000944102	0.018703	yes	-	-	-	-
Bra001915	8	0.333333	1.95667	0.0766667	-4.67365	0.000374945	0.00880809	yes	AT3G23605 (E=4e-037) | UBX domain-containing protein	-	GO:0003674//molecular_function;GO:0005515//protein binding;GO:0005488//binding	-
Bra001937	85.3333	416	5.6	27.41	2.2912	7.04638e-11	7.044e-09	yes	AT3G23920 (E=1e-263) BAM1, BMY7, TR-BAMY | BAM1 (BETA-AMYLASE 1); beta-amylase	-	GO:0003674//molecular_function;GO:0003824//catalytic activity;GO:0016787//hydrolase activity	GO:0008150//biological_process;GO:0009056//catabolic process;GO:0008152//metabolic process;GO:0044238//primary metabolic process;GO:0005975//carbohydrate metabolic process;GO:0071704//organic substance metabolic process
Bra001983	21	4.33333	2.30333	0.46	-2.32402	0.0019189	0.032685	yes	-	-	-	-
Bra001986	25	208.667	2.92	24.08	3.0438	5.21558e-10	4.60459e-08	yes	AT5G42180 (E=1e-156) | peroxidase 64 (PER64) (P64) (PRXR4)	-	GO:0003674//molecular_function;GO:0005488//binding;GO:0003824//catalytic activity	GO:0050896//response to stimulus;GO:0008150//biological_process;GO:0006950//response to stress;GO:0008152//metabolic process
Bra002002	17	92.6667	1.73	9.30667	2.42749	3.19535e-05	0.00109163	yes	AT2G16890 (E=7e-143) | UDP-glucoronosyl/UDP-glucosyl transferase family protein	-	GO:0003674//molecular_function;GO:0016740//transferase activity;GO:0003824//catalytic activity	GO:0008152//metabolic process;GO:0008150//biological_process
Bra002039	23	4	1.64333	0.28	-2.55313	0.000335303	0.00809335	yes	-	-	-	-
Bra002046	158.667	347.333	14.9733	32.14	1.10197	0.00176352	0.0305642	yes	AT3G11520 (E=5e-142) CYCB1;3, CYC2 | CYCB1;3 (CYCLIN B1;3); cyclin-dependent protein kinase regulator	GO:0043227//membrane-bounded organelle;GO:0005575//cellular_component;GO:0005623//cell;GO:0044464//cell part;GO:0005634//nucleus;GO:0044424//intracellular part;GO:0043226//organelle;GO:0005622//intracellular;GO:0043231//intracellular membrane-bounded organelle;GO:0043229//intracellular organelle	GO:0005488//binding;GO:0005515//protein binding;GO:0003674//molecular_function	GO:0048731//system development;GO:0044699//single-organism process;GO:0003006//developmental process involved in reproduction;GO:0044237//cellular metabolic process;GO:0071840//cellular component organization or biogenesis;GO:0043412//macromolecule modification;GO:0090304//nucleic acid metabolic process;GO:0006259//DNA metabolic process;GO:0043170//macromolecule metabolic process;GO:0032501//mult…
Bra002080	1082.33	168.333	253.793	40.1467	-2.6603	1.02136e-15	1.82324e-13	yes	-	-	-	-
Bra002085	0.666667	8.33333	0.0266667	0.316667	3.56986	0.0029293	0.0459622	yes	AT1G45616 (E=1e-233) AtRLP6 | AtRLP6 (Receptor Like Protein 6); protein binding	-	GO:0005488//binding;GO:0005515//protein binding;GO:0003674//molecular_function	-
Bra002098	219.333	63.3333	32.39	9.02333	-1.84382	0.00121849	0.0228962	yes	-	-	-	-
Bra002101	255.333	64.6667	29.3633	7.31667	-2.00476	5.75669e-06	0.000236446	yes	AT5G17710 (E=2e-105) EMB1241 | EMB1241 (embryo defective 1241); adenyl-nucleotide exchange factor/ chaperone binding / protein binding / protein homodimerization	GO:0005575//cellular_component;GO:0005623//cell;GO:0043226//organelle;GO:0044444//cytoplasmic part;GO:0005739//mitochondrion;GO:0043231//intracellular membrane-bounded organelle;GO:0005622//intracellular;GO:0044464//cell part;GO:0044424//intracellular part;GO:0043229//intracellular organelle;GO:0043227//membrane-bounded organelle;GO:0005737//cytoplasm	GO:0005515//protein binding;GO:0097159//organic cyclic compound binding;GO:0000166//nucleotide binding;GO:0030234//enzyme regulator activity;GO:0003674//molecular_function;GO:0036094//small molecule binding;GO:1901265//nucleoside phosphate binding;GO:1901363//heterocyclic compound binding;GO:0098772//molecular function regulator;GO:0005488//binding	GO:0009987//cellular process;GO:0008150//biological_process
Bra002137	247	25.3333	26.29	2.74	-3.26227	9.76092e-14	1.36104e-11	yes	AT5G18140 (E=5e-112) | DNAJ heat shock N-terminal domain-containing protein	GO:0044444//cytoplasmic part;GO:0044424//intracellular part;GO:0043229//intracellular organelle;GO:0005622//intracellular;GO:0009536//plastid;GO:0043227//membrane-bounded organelle;GO:0005575//cellular_component;GO:0043231//intracellular membrane-bounded organelle;GO:0005623//cell;GO:0043226//organelle;GO:0005737//cytoplasm;GO:0044464//cell part	-	-
Bra002174	73.6667	9.66667	7.43	1.01333	-2.87425	1.62666e-06	7.52829e-05	yes	AT5G18630 (E=2e-176) | lipase class 3 family protein	-	GO:0003824//catalytic activity;GO:0003674//molecular_function;GO:0016787//hydrolase activity	GO:0044238//primary metabolic process;GO:0008150//biological_process;GO:0008152//metabolic process;GO:0044699//single-organism process;GO:0071704//organic substance metabolic process;GO:0044710//single-organism metabolic process;GO:0006629//lipid metabolic process
Bra002235	42.0067	11	1.4	0.356667	-1.97278	0.00108967	0.020973	yes	AT5G19420 (E=0.0) | Ran GTPase binding / chromatin binding / zinc ion binding	-	GO:0005488//binding;GO:0003674//molecular_function	-
Bra002238	27.6667	5.33333	2.48667	0.456667	-2.445	0.000211494	0.00551906	yes	AT5G19460 (E=2e-134) atnudt20 | atnudt20 (Arabidopsis thaliana Nudix hydrolase homolog 20); hydrolase	-	GO:0003674//molecular_function;GO:0003824//catalytic activity;GO:0016787//hydrolase activity	-
Bra002245	927.333	3476.67	85.3633	315.997	1.88822	2.90867e-10	2.64705e-08	yes	AT5G19550 (E=7e-220) ASP2, AAT2 | ASP2 (ASPARTATE AMINOTRANSFERASE 2); L-aspartate:2-oxoglutarate aminotransferase	-	GO:0003674//molecular_function;GO:0003824//catalytic activity;GO:0005488//binding;GO:0016740//transferase activity	GO:0008150//biological_process;GO:0009987//cellular process;GO:0009058//biosynthetic process;GO:0008152//metabolic process
Bra002260	3.13	1202.63	0.286667	107.443	8.54999	2.04145e-71	9.47496e-68	yes	AT5G19770 (E=3e-139) TUA3 | TUA3; structural constituent of cytoskeleton	GO:0043228//non-membrane-bounded organelle;GO:0043226//organelle;GO:0005575//cellular_component;GO:0044424//intracellular part;GO:0044464//cell part;GO:0043232//intracellular non-membrane-bounded organelle;GO:0005856//cytoskeleton;GO:0005623//cell;GO:0005622//intracellular;GO:0043229//intracellular organelle	GO:0003674//molecular_function;GO:0036094//small molecule binding;GO:0000166//nucleotide binding;GO:0005198//structural molecule activity;GO:1901265//nucleoside phosphate binding;GO:0003824//catalytic activity;GO:0016787//hydrolase activity;GO:1901363//heterocyclic compound binding;GO:0005488//binding;GO:0097159//organic cyclic compound binding	GO:0009987//cellular process;GO:0008150//biological_process;GO:0016043//cellular component organization;GO:0071840//cellular component organization or biogenesis
Bra002261	3079.54	1061	252.743	86.4333	-1.54801	2.34072e-08	1.60438e-06	yes	AT5G19770 (E=6e-236) TUA3 | TUA3; structural constituent of cytoskeleton	GO:0043229//intracellular organelle;GO:0043228//non-membrane-bounded organelle;GO:0043232//intracellular non-membrane-bounded organelle;GO:0005623//cell;GO:0043226//organelle;GO:0005622//intracellular;GO:0044424//intracellular part;GO:0005575//cellular_component;GO:0005856//cytoskeleton;GO:0044464//cell part	GO:0000166//nucleotide binding;GO:0005488//binding;GO:0005198//structural molecule activity;GO:0003824//catalytic activity;GO:0016787//hydrolase activity;GO:0003674//molecular_function;GO:1901363//heterocyclic compound binding;GO:0036094//small molecule binding;GO:1901265//nucleoside phosphate binding;GO:0097159//organic cyclic compound binding	GO:0016043//cellular component organization;GO:0009987//cellular process;GO:0008150//biological_process;GO:0071840//cellular component organization or biogenesis
Bra002267	31.81	0.333333	2.55	0.03	-6.40939	3.93686e-09	3.07463e-07	yes	AT3G26010 (E=3e-100) | F-box family protein	-	GO:0005488//binding;GO:0003674//molecular_function;GO:0005515//protein binding	-
Bra002281	481.333	1082	24.5833	54.7567	1.15535	6.79575e-05	0.00209079	yes	-	-	-	-
Bra002286	340.333	150.667	15.0867	6.58667	-1.19565	0.00130365	0.024121	yes	AT5G20250 (E=0.0) DIN10 | DIN10 (DARK INDUCIBLE 10); hydrolase, hydrolyzing O-glycosyl compounds	-	GO:0003824//catalytic activity;GO:0003674//molecular_function	GO:0008150//biological_process;GO:0008152//metabolic process
Bra002290	837.98	2530.54	137.303	407.17	1.56826	1.75514e-07	1.01464e-05	yes	AT5G20290 (E=4e-087) | 40S ribosomal protein S8 (RPS8A)	GO:0005622//intracellular;GO:0043228//non-membrane-bounded organelle;GO:0044444//cytoplasmic part;GO:0044424//intracellular part;GO:0043226//organelle;GO:0005737//cytoplasm;GO:0043229//intracellular organelle;GO:1990904//ribonucleoprotein complex;GO:0043232//intracellular non-membrane-bounded organelle;GO:0005575//cellular_component;GO:0005840//ribosome;GO:0030529//intracellular ribonucleoprotein…	GO:0003674//molecular_function;GO:0005198//structural molecule activity	GO:0043603//cellular amide metabolic process;GO:0009058//biosynthetic process;GO:1901576//organic substance biosynthetic process;GO:0019538//protein metabolic process;GO:0009987//cellular process;GO:0043170//macromolecule metabolic process;GO:0043043//peptide biosynthetic process;GO:0008152//metabolic process;GO:0034641//cellular nitrogen compound metabolic process;GO:0044238//primary metabolic p…
Bra002322	1019.67	358	151.167	54.0233	-1.48449	1.76177e-05	0.000643848	yes	-	-	-	-
Bra002347	1.33333	23.3333	0.0366667	0.62	4.07973	1.38454e-06	6.56678e-05	yes	AT5G20960 (E=0.0) AAO1, AO1, ATAO, ATAO1 | AAO1 (ARABIDOPSIS ALDEHYDE OXIDASE 1); aldehyde oxidase/ indole-3-acetaldehyde oxidase	-	GO:0036094//small molecule binding;GO:0003674//molecular_function;GO:0005488//binding;GO:1901363//heterocyclic compound binding;GO:0000166//nucleotide binding;GO:1901265//nucleoside phosphate binding;GO:0097159//organic cyclic compound binding;GO:0003824//catalytic activity	GO:0008152//metabolic process;GO:0008150//biological_process
Bra002355	693	186.333	46.0267	12.2367	-1.91126	8.47488e-07	4.24908e-05	yes	AT5G21100 (E=1e-267) | L-ascorbate oxidase, putative	GO:0005576//extracellular region;GO:0005575//cellular_component	GO:0003824//catalytic activity;GO:0003674//molecular_function;GO:0005488//binding	GO:0008150//biological_process;GO:0008152//metabolic process
Bra002357	1334.67	254.333	86.2567	16.29	-2.40465	1.94645e-15	3.34594e-13	yes	AT5G21105 (E=2e-296) | L-ascorbate oxidase/ copper ion binding / oxidoreductase	GO:0005575//cellular_component;GO:0005576//extracellular region	GO:0005488//binding;GO:0003674//molecular_function;GO:0003824//catalytic activity	GO:0008150//biological_process;GO:0008152//metabolic process
Bra002383	642	218.333	60.07	20.7533	-1.5333	7.81277e-07	3.94144e-05	yes	AT5G22020 (E=1e-198) | strictosidine synthase family protein	GO:0005783//endoplasmic reticulum;GO:0044424//intracellular part;GO:0005623//cell;GO:0005737//cytoplasm;GO:0043231//intracellular membrane-bounded organelle;GO:0043226//organelle;GO:0005575//cellular_component;GO:0044464//cell part;GO:0005622//intracellular;GO:0012505//endomembrane system;GO:0043229//intracellular organelle;GO:0044444//cytoplasmic part;GO:0043227//membrane-bounded organelle	GO:0003674//molecular_function;GO:0003824//catalytic activity	GO:0009058//biosynthetic process;GO:0008150//biological_process;GO:0008152//metabolic process
Bra002423	1922.67	892.333	165.003	76.4567	-1.10978	0.00041838	0.00960619	yes	AT5G22630 (E=8e-221) ADT5 | ADT5 (arogenate dehydratase 5); arogenate dehydratase/ prephenate dehydratase	-	GO:0003674//molecular_function;GO:0003824//catalytic activity;GO:0005488//binding	GO:0009987//cellular process;GO:0009058//biosynthetic process;GO:0008152//metabolic process;GO:0008150//biological_process
Bra002513	0	8	0.001	0.84	9.71425	0.00179272	0.0309807	yes	AT5G60080 (E=2e-078) | protein kinase family protein	-	GO:0003824//catalytic activity;GO:0016772//transferase activity, transferring phosphorus-containing groups;GO:1901363//heterocyclic compound binding;GO:1901265//nucleoside phosphate binding;GO:0000166//nucleotide binding;GO:0003674//molecular_function;GO:0016301//kinase activity;GO:0005488//binding;GO:0016740//transferase activity;GO:0097159//organic cyclic compound binding;GO:0036094//small mole…	GO:0008152//metabolic process;GO:0044267//cellular protein metabolic process;GO:0044237//cellular metabolic process;GO:0071704//organic substance metabolic process;GO:0006464//cellular protein modification process;GO:0019538//protein metabolic process;GO:0044260//cellular macromolecule metabolic process;GO:0036211//protein modification process;GO:0008150//biological_process;GO:0009987//cellular p…
Bra002518	14.3333	66.3333	1.43	7.30667	2.3532	0.00167771	0.0294156	yes	-	-	-	-
Bra002617	0.666667	11.6667	0.253333	4.14333	4.03168	0.000595202	0.0128148	yes	-	-	-	-
Bra002631	1	25.3333	0.0966667	2.77333	4.84246	7.66321e-05	0.00231385	yes	AT5G58630 (E=9e-098) | unknown protein	-	GO:0003674//molecular_function;GO:0005488//binding;GO:0005515//protein binding	-
Bra002642	165	32.3333	33.2333	6.61333	-2.32918	3.90177e-07	2.11274e-05	yes	-	-	-	-
Bra002671	242.333	105	47.5333	19.8333	-1.26101	0.00131694	0.0242964	yes	AT5G58110 (E=5e-085) | ATPase activator/ chaperone binding	-	GO:0030234//enzyme regulator activity;GO:0005488//binding;GO:0003674//molecular_function;GO:0005515//protein binding;GO:0098772//molecular function regulator	GO:0008150//biological_process
Bra002822	837.897	339.72	62.86	25.52	-1.30051	3.46369e-05	0.00117099	yes	AT5G56350 (E=3e-275) | pyruvate kinase, putative	-	GO:0016772//transferase activity, transferring phosphorus-containing groups;GO:0016301//kinase activity;GO:0005488//binding;GO:0016740//transferase activity;GO:0003824//catalytic activity;GO:0003674//molecular_function	GO:0006091//generation of precursor metabolites and energy;GO:0044238//primary metabolic process;GO:0005975//carbohydrate metabolic process;GO:0034641//cellular nitrogen compound metabolic process;GO:0009056//catabolic process;GO:0044237//cellular metabolic process;GO:0006725//cellular aromatic compound metabolic process;GO:0046483//heterocycle metabolic process;GO:0006807//nitrogen compound meta…
Bra002860	2198.33	176	287.92	22.8733	-3.65393	3.74392e-27	1.64373e-24	yes	-	-	-	-
Bra002873	214	65.3333	12.2433	3.52333	-1.79698	0.000299182	0.0073249	yes	AT5G55830 (E=0.0) | lectin protein kinase, putative	GO:0005886//plasma membrane;GO:0071944//cell periphery;GO:0044464//cell part;GO:0005575//cellular_component;GO:0016020//membrane;GO:0005623//cell	GO:0016301//kinase activity;GO:0003674//molecular_function;GO:0003824//catalytic activity;GO:0016772//transferase activity, transferring phosphorus-containing groups;GO:0030246//carbohydrate binding;GO:1901363//heterocyclic compound binding;GO:0005488//binding;GO:0097159//organic cyclic compound binding;GO:1901265//nucleoside phosphate binding;GO:0016740//transferase activity;GO:0036094//small mo…	GO:0008150//biological_process;GO:0043412//macromolecule modification;GO:0008152//metabolic process;GO:0019538//protein metabolic process;GO:0016043//cellular component organization;GO:0009987//cellular process;GO:0036211//protein modification process;GO:0006464//cellular protein modification process;GO:0044699//single-organism process;GO:0044267//cellular protein metabolic process;GO:0007049//ce…
Bra002910	57.3333	16.3333	6.28333	1.78333	-1.81695	0.000618586	0.0132132	yes	AT5G55350 (E=8e-141) | membrane bound O-acyl transferase (MBOAT) family protein / wax synthase-related	-	GO:0016740//transferase activity;GO:0003674//molecular_function;GO:0003824//catalytic activity	-
Bra002919	1653	332.333	157.9	31.48	-2.3265	1.22531e-12	1.54899e-10	yes	AT5G55250 (E=2e-214) IAMT1 | IAMT1 (IAA CARBOXYLMETHYLTRANSFERASE 1); S-adenosylmethionine-dependent methyltransferase/ indole acetic acid carboxyl methyltransferase	-	GO:0003674//molecular_function;GO:0005515//protein binding;GO:0003824//catalytic activity;GO:0005488//binding;GO:0016740//transferase activity	GO:0044767//single-organism developmental process;GO:0008152//metabolic process;GO:0044238//primary metabolic process;GO:0044699//single-organism process;GO:0044707//single-multicellular organism process;GO:0009058//biosynthetic process;GO:0007275//multicellular organism development;GO:0032502//developmental process;GO:0009987//cellular process;GO:0008150//biological_process;GO:0071704//organic s…
Bra002927	551.417	154	44.1167	12.14	-1.86156	2.60658e-09	2.09617e-07	yes	AT5G55180 (E=5e-213) | glycosyl hydrolase family 17 protein	-	GO:0016787//hydrolase activity;GO:0003824//catalytic activity;GO:0003674//molecular_function	GO:0044238//primary metabolic process;GO:0008150//biological_process;GO:0005975//carbohydrate metabolic process;GO:0071704//organic substance metabolic process;GO:0008152//metabolic process
Bra003001	29.6667	6.33333	1.57	0.356667	-2.13812	0.00132084	0.0243546	yes	AT5G54250 (E=0.0) ATCNGC4, CNGC4, HLM1, DND2 | ATCNGC4 (CYCLIC NUCLEOTIDE-GATED CATION CHANNEL 4); calmodulin binding / cation channel/ cation transmembrane transporter/ cyclic nucleotide binding	GO:0016020//membrane;GO:0005575//cellular_component	GO:0005215//transporter activity;GO:0003674//molecular_function	GO:0051179//localization;GO:0008150//biological_process;GO:0009987//cellular process;GO:0006810//transport;GO:0051234//establishment of localization
Bra003021	13.6667	0	2.4	0.001	-11.2288	5.30201e-07	2.77387e-05	yes	AT5G54060 (E=6e-081) UF3GT | UF3GT (udp-glucose:flavonoid 3-O-glucosyltransferase); transferase, transferring glycosyl groups	-	GO:0003674//molecular_function;GO:0003824//catalytic activity;GO:0016740//transferase activity	GO:0008152//metabolic process;GO:0008150//biological_process
Bra003126	4879.72	629.333	258.97	32.85	-2.97882	8.4791e-17	1.72173e-14	yes	AT3G53260 (E=0.0) PAL2, ATPAL2 | PAL2; phenylalanine ammonia-lyase	GO:0005623//cell;GO:0005622//intracellular;GO:0005575//cellular_component;GO:0044464//cell part;GO:0044424//intracellular part;GO:0005737//cytoplasm	GO:0003824//catalytic activity;GO:0003674//molecular_function	GO:0019748//secondary metabolic process;GO:0009056//catabolic process;GO:0009987//cellular process;GO:0008150//biological_process;GO:0044710//single-organism metabolic process;GO:0008152//metabolic process;GO:0009058//biosynthetic process;GO:0044699//single-organism process
Bra003177	182.333	26.6667	26.4567	3.94	-2.74736	0.000552504	0.0120634	yes	AT3G54300 (E=2e-125) ATVAMP727, VAMP727 | ATVAMP727 (VESICLE-ASSOCIATED MEMBRANE PROTEIN 727)	GO:0016020//membrane;GO:0005575//cellular_component	-	GO:0006810//transport;GO:0051179//localization;GO:0051234//establishment of localization;GO:0008150//biological_process
Bra003196	163	58.3333	21.51	7.73333	-1.47585	0.00161378	0.0285412	yes	AT3G54820 (E=7e-157) PIP2D, PIP2;5 | PIP2;5 (PLASMA MEMBRANE INTRINSIC PROTEIN 2;5); water channel	GO:0005575//cellular_component;GO:0016020//membrane	GO:0005215//transporter activity;GO:0003674//molecular_function	GO:0051234//establishment of localization;GO:0051179//localization;GO:0008150//biological_process;GO:0006810//transport
Bra003209	112.333	21.6667	18.4	3.66333	-2.32848	3.4401e-05	0.00116544	yes	AT3G55120 (E=2e-090) TT5, A11, CFI | TT5 (TRANSPARENT TESTA 5); chalcone isomerase	-	GO:0003824//catalytic activity;GO:0003674//molecular_function	GO:0008150//biological_process;GO:0008152//metabolic process;GO:0009058//biosynthetic process
Bra003212	73.3333	23	6.05	1.85	-1.70941	0.000655456	0.0138096	yes	AT3G55430 (E=7e-224) | glycosyl hydrolase family 17 protein / beta-1,3-glucanase, putative	-	GO:0003674//molecular_function;GO:0016787//hydrolase activity;GO:0003824//catalytic activity	GO:0071704//organic substance metabolic process;GO:0008152//metabolic process;GO:0044238//primary metabolic process;GO:0005975//carbohydrate metabolic process;GO:0008150//biological_process
Bra003245	14.6667	44.6667	1.43667	4.40667	1.61696	0.00210421	0.0351858	yes	AT3G56620 (E=1e-149) | integral membrane family protein / nodulin MtN21-related	GO:0005575//cellular_component;GO:0016020//membrane	GO:0005215//transporter activity;GO:0003674//molecular_function	GO:0006810//transport;GO:0051234//establishment of localization;GO:0008150//biological_process;GO:0051179//localization;GO:0009987//cellular process
Bra003248	66.7	3.33333	4.38667	0.226667	-4.27448	3.75733e-09	2.9486e-07	yes	AT3G56700 (E=4e-126) FAR6 | FAR6 (FATTY ACID REDUCTASE 6); fatty acyl-CoA reductase (alcohol-forming)/ oxidoreductase, acting on the CH-CH group of donors, NAD or NADP as acceptor	-	GO:0003674//molecular_function;GO:0003824//catalytic activity	-
Bra003255	458.3	15.6667	29.8833	0.993333	-4.91092	1.91074e-15	3.30203e-13	yes	AT3G56700 (E=2e-127) FAR6 | FAR6 (FATTY ACID REDUCTASE 6); fatty acyl-CoA reductase (alcohol-forming)/ oxidoreductase, acting on the CH-CH group of donors, NAD or NADP as acceptor	-	GO:0003824//catalytic activity;GO:0003674//molecular_function	-
Bra003263	2595.33	1200	264.9	122.25	-1.11561	0.00142402	0.0258898	yes	AT3G57020 (E=5e-184) | strictosidine synthase family protein	-	GO:0003824//catalytic activity;GO:0003674//molecular_function	GO:0008150//biological_process;GO:0008152//metabolic process;GO:0009058//biosynthetic process
Bra003280	0.333333	10	0.02	0.653333	5.02975	0.000135335	0.00376124	yes	-	-	-	-
Bra003289	24.76	122.327	1.71333	8.24667	2.26701	3.22468e-06	0.000138948	yes	AT3G57610 (E=5e-231) ADSS | ADSS (ADENYLOSUCCINATE SYNTHASE); adenylosuccinate synthase	GO:0043229//intracellular organelle;GO:0043226//organelle;GO:0043227//membrane-bounded organelle;GO:0005737//cytoplasm;GO:0043231//intracellular membrane-bounded organelle;GO:0005623//cell;GO:0009536//plastid;GO:0044464//cell part;GO:0044424//intracellular part;GO:0044444//cytoplasmic part;GO:0005622//intracellular;GO:0005575//cellular_component	GO:0003824//catalytic activity;GO:0000166//nucleotide binding;GO:0003674//molecular_function;GO:1901363//heterocyclic compound binding;GO:0036094//small molecule binding;GO:0097159//organic cyclic compound binding;GO:1901265//nucleoside phosphate binding;GO:0005488//binding	GO:0009987//cellular process;GO:0044237//cellular metabolic process;GO:0006139//nucleobase-containing compound metabolic process;GO:0008150//biological_process;GO:0006807//nitrogen compound metabolic process;GO:0034641//cellular nitrogen compound metabolic process;GO:0044238//primary metabolic process;GO:0006725//cellular aromatic compound metabolic process;GO:0009058//biosynthetic process;GO:000…
Bra003339	319.667	116.333	28.5667	10.4633	-1.44899	6.85719e-05	0.00210488	yes	AT3G58490 (E=1e-214) | phosphatidic acid phosphatase family protein / PAP2 family protein	GO:0044444//cytoplasmic part;GO:0005575//cellular_component;GO:0005623//cell;GO:0005737//cytoplasm;GO:0005783//endoplasmic reticulum;GO:0043229//intracellular organelle;GO:0043226//organelle;GO:0005622//intracellular;GO:0043227//membrane-bounded organelle;GO:0016020//membrane;GO:0044424//intracellular part;GO:0012505//endomembrane system;GO:0043231//intracellular membrane-bounded organelle;GO:004…	GO:0003824//catalytic activity;GO:0003674//molecular_function	GO:0044238//primary metabolic process;GO:0071704//organic substance metabolic process;GO:0009987//cellular process;GO:0009719//response to endogenous stimulus;GO:0008150//biological_process;GO:0008152//metabolic process;GO:0044699//single-organism process;GO:0006629//lipid metabolic process;GO:0050896//response to stimulus;GO:0044710//single-organism metabolic process
Bra003340	292.333	679	34.6633	80.51	1.21576	2.77797e-05	0.000961167	yes	AT3G58500 (E=3e-186) PP2A-3, EP7 | PP2A-3 (PROTEIN PHOSPHATASE 2A-3); protein serine/threonine phosphatase	-	GO:0016787//hydrolase activity;GO:0003674//molecular_function;GO:0003824//catalytic activity	GO:0036211//protein modification process;GO:0043412//macromolecule modification;GO:0044238//primary metabolic process;GO:0009987//cellular process;GO:0071704//organic substance metabolic process;GO:0008150//biological_process;GO:0019538//protein metabolic process;GO:0008152//metabolic process;GO:0043170//macromolecule metabolic process;GO:0044267//cellular protein metabolic process;GO:0006464//ce…
Bra003359	1.33333	10.3333	0.186667	1.43667	2.94419	0.00155647	0.0277543	yes	AT3G58840 (E=3e-021) | LOCATED IN: mitochondrion, plastid; EXPRESSED IN: 21 plant structures; EXPRESSED DURING: 9 growth stages; BEST Arabidopsis thaliana protein match is: myosin heavy chain-related (TAIR:AT1G06530.1); Has 122842 Blast hits to 54311 proteins in 2061 species: Archae - 1832; Bacteria - 13809; Metazoa - 62057; Fungi - 8845; Plants - 4054; Viruses - 676; Other Eukaryotes - 31569 (so…	GO:0044444//cytoplasmic part;GO:0005575//cellular_component;GO:0043229//intracellular organelle;GO:0044424//intracellular part;GO:0043231//intracellular membrane-bounded organelle;GO:0043227//membrane-bounded organelle;GO:0016020//membrane;GO:0009536//plastid;GO:0044464//cell part;GO:0042579//microbody;GO:0043226//organelle;GO:0005737//cytoplasm;GO:0005739//mitochondrion;GO:0005622//intracellular…	-	GO:0016043//cellular component organization;GO:0008150//biological_process;GO:0071840//cellular component organization or biogenesis;GO:0009987//cellular process
Bra003361	3747	505.333	273.01	37.1433	-2.87778	2.36318e-18	5.4841e-16	yes	AT3G59030 (E=7e-251) TT12, ATTT12 | TT12 (TRANSPARENT TESTA 12); antiporter/ solute:hydrogen antiporter/ transmembrane transporter/ transporter	GO:0005575//cellular_component;GO:0016020//membrane;GO:0043231//intracellular membrane-bounded organelle;GO:0043226//organelle;GO:0044424//intracellular part;GO:0043229//intracellular organelle;GO:0005737//cytoplasm;GO:0044444//cytoplasmic part;GO:0005773//vacuole;GO:0044464//cell part;GO:0005622//intracellular;GO:0005623//cell;GO:0043227//membrane-bounded organelle	GO:0003674//molecular_function;GO:0005215//transporter activity	GO:0009791//post-embryonic development;GO:0044699//single-organism process;GO:0009058//biosynthetic process;GO:0051234//establishment of localization;GO:0032502//developmental process;GO:0032501//multicellular organismal process;GO:0044707//single-multicellular organism process;GO:0008152//metabolic process;GO:0007275//multicellular organism development;GO:0006810//transport;GO:0044710//single-or…
Bra003376	69	9.66667	12.0867	1.80333	-2.74468	3.20436e-05	0.00109355	yes	AT3G59440 (E=4e-097) | calcium-binding protein, putative	-	GO:0005488//binding;GO:0003674//molecular_function	-
Bra003387	69	174.667	7.48	19.3	1.36749	0.00054336	0.0119198	yes	AT2G43770 (E=7e-183) | transducin family protein / WD-40 repeat family protein	-	GO:0005488//binding;GO:0003674//molecular_function;GO:0005515//protein binding	-
Bra003401	261.333	57.3333	18.95	4.16	-2.18754	1.0521e-08	7.71593e-07	yes	AT3G60130 (E=2e-263) BGLU16 | BGLU16 (BETA GLUCOSIDASE 16); catalytic/ cation binding / hydrolase, hydrolyzing O-glycosyl compounds	-	GO:0003674//molecular_function;GO:0003824//catalytic activity;GO:0016787//hydrolase activity	GO:0008152//metabolic process;GO:0071704//organic substance metabolic process;GO:0005975//carbohydrate metabolic process;GO:0008150//biological_process;GO:0044238//primary metabolic process
Bra003428	818.333	242.333	134.933	40.2033	-1.74686	2.14592e-09	1.76503e-07	yes	AT3G60820 (E=5e-121) PBF1 | PBF1; peptidase/ threonine-type endopeptidase	GO:0043226//organelle;GO:0005623//cell;GO:0044464//cell part;GO:0005575//cellular_component;GO:0043229//intracellular organelle;GO:0005622//intracellular;GO:0005634//nucleus;GO:0044424//intracellular part;GO:0005737//cytoplasm;GO:0043227//membrane-bounded organelle;GO:0043231//intracellular membrane-bounded organelle	GO:0016787//hydrolase activity;GO:0003674//molecular_function;GO:0003824//catalytic activity	GO:0009987//cellular process;GO:0008150//biological_process;GO:0071704//organic substance metabolic process;GO:0044238//primary metabolic process;GO:0043170//macromolecule metabolic process;GO:0008152//metabolic process;GO:0009056//catabolic process;GO:0019538//protein metabolic process
Bra003430	11.3333	0.666667	0.7	0.04	-4.12928	0.000114437	0.00329022	yes	-	-	-	-
Bra003432	1783	4436.33	157.593	376.81	1.25763	0.0005446	0.0119309	yes	-	-	-	-
Bra003465	101	37.6667	10.11	3.8	-1.41171	0.0011998	0.0226298	yes	-	-	-	-
Bra003480	12	122.333	0.973333	10.09	3.37385	1.60682e-10	1.50879e-08	yes	-	-	-	-
Bra003535	1502.67	83.6667	74.3567	4.16333	-4.15865	4.79219e-36	3.89233e-33	yes	AT1G79840 (E=0.0) GL2 | GL2 (GLABRA 2); DNA binding / transcription factor	GO:0044424//intracellular part;GO:0005622//intracellular;GO:0044464//cell part;GO:0043229//intracellular organelle;GO:0005623//cell;GO:0005634//nucleus;GO:0043226//organelle;GO:0043227//membrane-bounded organelle;GO:0005575//cellular_component;GO:0043231//intracellular membrane-bounded organelle	GO:0097159//organic cyclic compound binding;GO:0008289//lipid binding;GO:0001071//nucleic acid binding transcription factor activity;GO:0005488//binding;GO:0003700//transcription factor activity, sequence-specific DNA binding;GO:0003677//DNA binding;GO:1901363//heterocyclic compound binding;GO:0003674//molecular_function;GO:0003676//nucleic acid binding	GO:0006807//nitrogen compound metabolic process;GO:0044237//cellular metabolic process;GO:0071704//organic substance metabolic process;GO:0006139//nucleobase-containing compound metabolic process;GO:0006725//cellular aromatic compound metabolic process;GO:0009058//biosynthetic process;GO:0009987//cellular process;GO:0008152//metabolic process;GO:0008150//biological_process;GO:0044238//primary met…
Bra003546	638.667	298.333	97.0933	45.13	-1.10529	0.000260214	0.00650315	yes	AT1G80040 (E=8e-075) | unknown protein	-	GO:0005488//binding;GO:0003674//molecular_function;GO:0005515//protein binding	-
Bra003619	18.3333	0	2.43	0.001	-11.2467	6.84895e-06	0.000277058	yes	AT1G79180 (E=1e-098) ATMYB63, MYB63 | MYB63 (MYB DOMAIN PROTEIN 63); DNA binding / transcription activator/ transcription factor	-	GO:0005488//binding;GO:0097159//organic cyclic compound binding;GO:1901363//heterocyclic compound binding;GO:0003674//molecular_function;GO:0044877//macromolecular complex binding;GO:0003676//nucleic acid binding;GO:0003682//chromatin binding;GO:0003677//DNA binding	-
Bra003631	3.33333	133	0.57	22.45	5.29961	2.44542e-16	4.72912e-14	yes	-	-	-	-
Bra003635	11606	3.66667	978.163	0.32	-11.5778	1.18815e-92	3.86019e-88	yes	-	-	-	-
Bra003651	57.3333	18	7.9	2.42	-1.70685	0.00149336	0.02685	yes	AT1G78260 (E=2e-073) | RNA recognition motif (RRM)-containing protein	-	GO:0036094//small molecule binding;GO:1901265//nucleoside phosphate binding;GO:0005488//binding;GO:0097159//organic cyclic compound binding;GO:0000166//nucleotide binding;GO:1901363//heterocyclic compound binding;GO:0003676//nucleic acid binding;GO:0003674//molecular_function	-
Bra003654	34.3333	5.33333	1.35	0.216667	-2.63941	6.36076e-05	0.00197756	yes	-	-	-	-
Bra003655	9.66667	0.333333	1.56	0.05	-4.96347	0.000100342	0.00293431	yes	-	-	-	-
Bra003658	21.3333	0.333333	2.29	0.04	-5.8392	1.04967e-07	6.36243e-06	yes	-	-	-	-
Bra003661	0	50	0.001	12.3367	13.5907	3.29948e-14	4.82869e-12	yes	-	-	-	-
Bra003692	185	53	18.76	5.49333	-1.77191	2.5869e-05	0.00090344	yes	AT1G77000 (E=2e-185) ATSKP2;2, SKP2B | SKP2B; ubiquitin-protein ligase	-	GO:0003674//molecular_function;GO:0005515//protein binding;GO:0005488//binding	-
Bra003693	59.6667	160.333	4.77667	13.5267	1.50173	0.00201821	0.0340091	yes	AT1G76990 (E=9e-248) ACR3 | ACR3; amino acid binding	-	GO:0003674//molecular_function;GO:0005488//binding	GO:0008150//biological_process;GO:0008152//metabolic process
Bra003713	533.333	53.3333	88.8167	8.85	-3.32708	7.95175e-19	1.94244e-16	yes	-	-	-	-
Bra003720	73	18.3333	14.9567	3.79333	-1.97925	0.000836392	0.0168466	yes	AT1G76410 (E=2e-061) ATL8 | ATL8; protein binding / zinc ion binding	-	GO:0005488//binding;GO:0003674//molecular_function;GO:0005515//protein binding	-
Bra003724	9	0	0.736667	0.001	-9.52487	1.97846e-05	0.000711831	yes	AT1G76360 (E=1e-189) | protein kinase, putative	-	GO:1901363//heterocyclic compound binding;GO:0016772//transferase activity, transferring phosphorus-containing groups;GO:0016740//transferase activity;GO:0003824//catalytic activity;GO:0000166//nucleotide binding;GO:0003674//molecular_function;GO:0036094//small molecule binding;GO:0005488//binding;GO:0016301//kinase activity;GO:0097159//organic cyclic compound binding;GO:1901265//nucleoside phosp…	GO:0019538//protein metabolic process;GO:0008150//biological_process;GO:0006464//cellular protein modification process;GO:0044267//cellular protein metabolic process;GO:0009987//cellular process;GO:0044260//cellular macromolecule metabolic process;GO:0043412//macromolecule modification;GO:0071704//organic substance metabolic process;GO:0043170//macromolecule metabolic process;GO:0036211//protein …
Bra003732	1393	686	263.177	130.297	-1.01423	0.000226717	0.00586449	yes	AT1G76180 (E=2e-017) ERD14 | ERD14 (EARLY RESPONSE TO DEHYDRATION 14); calcium ion binding	-	-	GO:0050896//response to stimulus;GO:0006950//response to stress;GO:0009628//response to abiotic stimulus;GO:0008150//biological_process
Bra003733	60	527.667	5.01667	43.9	3.12942	2.80317e-19	7.17103e-17	yes	AT1G76010 (E=5e-085) | nucleic acid binding	-	GO:0003676//nucleic acid binding;GO:0003674//molecular_function;GO:0005488//binding;GO:0097159//organic cyclic compound binding;GO:1901363//heterocyclic compound binding	-
Bra003739	91.3333	10	16.8267	1.82333	-3.2061	1.01374e-07	6.15615e-06	yes	AT1G75840 (E=2e-099) ARAC5, ATGP3, ROP4, ATROP4 | ARAC5 (RAC-LIKE GTP BINDING PROTEIN 5); GTP binding / GTPase	GO:0005622//intracellular;GO:0005623//cell;GO:0005575//cellular_component;GO:0044464//cell part;GO:0016020//membrane	GO:0005488//binding;GO:0036094//small molecule binding;GO:0097159//organic cyclic compound binding;GO:0003674//molecular_function;GO:0000166//nucleotide binding;GO:1901265//nucleoside phosphate binding;GO:1901363//heterocyclic compound binding	GO:0050896//response to stimulus;GO:0050789//regulation of biological process;GO:0007154//cell communication;GO:0044763//single-organism cellular process;GO:0044700//single organism signaling;GO:0051716//cellular response to stimulus;GO:0009987//cellular process;GO:0008150//biological_process;GO:0065007//biological regulation;GO:0044699//single-organism process;GO:0050794//regulation of cellular …
Bra003787	75.6667	24.3333	5.64	1.84333	-1.61338	0.000843896	0.0169557	yes	AT1G74750 (E=9e-265) | pentatricopeptide (PPR) repeat-containing protein	-	GO:0003674//molecular_function;GO:0005488//binding;GO:0005515//protein binding	-
Bra003807	5607	2389.67	236.433	95.06	-1.31452	0.00307349	0.0476406	yes	AT1G74310 (E=0.0) ATHSP101, HSP101, HOT1 | ATHSP101 (ARABIDOPSIS THALIANA HEAT SHOCK PROTEIN 101); ATP binding / ATPase/ nucleoside-triphosphatase/ nucleotide binding / protein binding	-	GO:0003824//catalytic activity;GO:0097159//organic cyclic compound binding;GO:0036094//small molecule binding;GO:0003674//molecular_function;GO:1901265//nucleoside phosphate binding;GO:0000166//nucleotide binding;GO:1901363//heterocyclic compound binding;GO:0016787//hydrolase activity;GO:0005488//binding	GO:0008152//metabolic process;GO:0008150//biological_process;GO:0043170//macromolecule metabolic process;GO:0044238//primary metabolic process;GO:0019538//protein metabolic process;GO:0071704//organic substance metabolic process
Bra003825	0	12.6667	0.001	0.44	8.78136	1.30122e-05	0.000492144	yes	AT1G73860 (E=0.0) | ATP binding / microtubule motor	GO:0005622//intracellular;GO:0005575//cellular_component;GO:0005856//cytoskeleton;GO:0043228//non-membrane-bounded organelle;GO:0005623//cell;GO:0044464//cell part;GO:0044424//intracellular part;GO:0043232//intracellular non-membrane-bounded organelle;GO:0043226//organelle;GO:0043229//intracellular organelle	GO:0005515//protein binding;GO:1901363//heterocyclic compound binding;GO:1901265//nucleoside phosphate binding;GO:0016787//hydrolase activity;GO:0016817//hydrolase activity, acting on acid anhydrides;GO:0017111//nucleoside-triphosphatase activity;GO:0097159//organic cyclic compound binding;GO:0016462//pyrophosphatase activity;GO:0036094//small molecule binding;GO:0000166//nucleotide binding;GO:00…	GO:0008150//biological_process;GO:0009987//cellular process
Bra003835	6.66667	74.6667	1.03333	11.52	3.47876	8.73417e-07	4.3589e-05	yes	AT1G73655 (E=3e-100) | FK506 binding / peptidyl-prolyl cis-trans isomerase	-	GO:0003674//molecular_function;GO:0003824//catalytic activity	GO:0044267//cellular protein metabolic process;GO:0044238//primary metabolic process;GO:0008150//biological_process;GO:0005975//carbohydrate metabolic process;GO:0043170//macromolecule metabolic process;GO:0071704//organic substance metabolic process;GO:0044237//cellular metabolic process;GO:0009987//cellular process;GO:0008152//metabolic process;GO:0044260//cellular macromolecule metabolic proce…
Bra003843	208.667	72.3333	20.54	6.72333	-1.61119	0.000691165	0.0144314	yes	-	-	-	-
Bra003847	50.3333	9.66667	8.39667	1.59	-2.40079	2.59506e-05	0.000904624	yes	-	-	-	-
Bra003850	873.667	77	160.073	13.7667	-3.53948	3.46698e-24	1.23779e-21	yes	AT1G73260 (E=5e-079) | trypsin and protease inhibitor family protein / Kunitz family protein	-	GO:0003674//molecular_function;GO:0098772//molecular function regulator;GO:0030234//enzyme regulator activity	GO:0071704//organic substance metabolic process;GO:0044238//primary metabolic process;GO:0008152//metabolic process;GO:0009987//cellular process;GO:0043170//macromolecule metabolic process;GO:0008150//biological_process;GO:0019538//protein metabolic process
Bra003859	475	2	87.0233	0.35	-7.9579	4.70985e-41	4.78182e-38	yes	AT1G73030 (E=7e-093) VPS46.2 | VPS46.2	-	-	GO:0006810//transport;GO:0051179//localization;GO:0051234//establishment of localization;GO:0008150//biological_process
Bra003861	9.33333	62	0.48	3.32667	2.79297	3.13209e-05	0.0010734	yes	AT1G72990 (E=3e-262) BGAL17 | BGAL17 (beta-galactosidase 17); beta-galactosidase/ catalytic/ cation binding	-	GO:0003824//catalytic activity;GO:0003674//molecular_function;GO:0016787//hydrolase activity	GO:0005975//carbohydrate metabolic process;GO:0009791//post-embryonic development;GO:0008150//biological_process;GO:0019538//protein metabolic process;GO:0043412//macromolecule modification;GO:0043170//macromolecule metabolic process;GO:0044237//cellular metabolic process;GO:0044238//primary metabolic process;GO:0007275//multicellular organism development;GO:0044767//single-organism developmental…
Bra003869	1555.33	168	108.293	11.51	-3.23398	1.70192e-23	5.75975e-21	yes	-	-	-	-
Bra003892	12	63.3333	0.86	4.37333	2.34632	1.34e-05	0.000504466	yes	AT1G72150 (E=3e-181) PATL1 | PATL1 (PATELLIN 1); transporter	GO:0016020//membrane;GO:0005575//cellular_component	-	GO:0051234//establishment of localization;GO:0008150//biological_process;GO:0006810//transport;GO:0051179//localization
Bra003896	0.666667	46	0.0466667	3.15	6.07682	1.7072e-11	1.88017e-09	yes	AT1G72130 (E=1e-221) | proton-dependent oligopeptide transport (POT) family protein	GO:0016020//membrane;GO:0005575//cellular_component	GO:0005215//transporter activity;GO:0003674//molecular_function	GO:0006810//transport;GO:0051179//localization;GO:0008150//biological_process;GO:0051234//establishment of localization
Bra003897	2	115.667	0.133333	7.82667	5.87529	6.50417e-16	1.18716e-13	yes	AT1G72130 (E=1e-205) | proton-dependent oligopeptide transport (POT) family protein	GO:0005575//cellular_component;GO:0016020//membrane	GO:0003674//molecular_function;GO:0005215//transporter activity	GO:0008150//biological_process;GO:0051179//localization;GO:0051234//establishment of localization;GO:0006810//transport
Bra003898	167.333	2.33333	10.9033	0.146667	-6.21608	7.21551e-21	2.07456e-18	yes	AT1G72125 (E=1e-226) | transporter	GO:0005575//cellular_component;GO:0016020//membrane	GO:0003674//molecular_function;GO:0005215//transporter activity	GO:0006810//transport;GO:0008150//biological_process;GO:0051179//localization;GO:0051234//establishment of localization
Bra003899	130	28.6667	12.3833	2.72667	-2.18319	0.000123805	0.00348856	yes	AT1G72050 (E=8e-124) TFIIIA | TFIIIA (TRANSCRIPTION FACTOR IIIA); 5S rDNA binding / 5S rRNA binding / nucleic acid binding / transcription factor/ zinc ion binding	-	GO:0005488//binding;GO:0003676//nucleic acid binding;GO:1901363//heterocyclic compound binding;GO:0003674//molecular_function;GO:0097159//organic cyclic compound binding	-
Bra003909	1007	253.333	76.2267	19.3567	-1.97747	2.497e-08	1.69363e-06	yes	AT2G46960 (E=8e-132) CYP709B1 | CYP709B1; electron carrier/ heme binding / iron ion binding / monooxygenase/ oxygen binding	-	GO:0003674//molecular_function;GO:0003824//catalytic activity;GO:0005488//binding	GO:0008150//biological_process;GO:0008152//metabolic process
Bra003953	57.6667	14.3333	4.83333	1.14333	-2.07977	0.000201376	0.00530616	yes	AT3G29670 (E=3e-158) | transferase family protein	-	GO:0016740//transferase activity;GO:0003824//catalytic activity;GO:0003674//molecular_function	-
Bra003954	0	6.68	0.001	1.41667	10.4683	0.000267888	0.00667474	yes	AT1G70490 (E=6e-095) ATARFA1D, ARFA1D | ARFA1D; GTP binding / phospholipase activator/ protein binding	GO:0005622//intracellular;GO:0005575//cellular_component;GO:0044464//cell part;GO:0005623//cell	GO:1901363//heterocyclic compound binding;GO:0003674//molecular_function;GO:0097159//organic cyclic compound binding;GO:0005488//binding;GO:0000166//nucleotide binding;GO:1901265//nucleoside phosphate binding;GO:0036094//small molecule binding	GO:0008150//biological_process;GO:0044699//single-organism process;GO:0023052//signaling;GO:0051716//cellular response to stimulus;GO:0050789//regulation of biological process;GO:0044700//single organism signaling;GO:0065007//biological regulation;GO:0007154//cell communication;GO:0044763//single-organism cellular process;GO:0009987//cellular process;GO:0007165//signal transduction;GO:0050794//re…
Bra003960	94	22.6667	8.79333	2.13333	-2.0433	2.30427e-05	0.000817668	yes	AT1G70230 (E=5e-183) | unknown protein	GO:0044444//cytoplasmic part;GO:0012505//endomembrane system;GO:0005575//cellular_component;GO:0043227//membrane-bounded organelle;GO:0043229//intracellular organelle;GO:0043226//organelle;GO:0005623//cell;GO:0044424//intracellular part;GO:0005622//intracellular;GO:0043231//intracellular membrane-bounded organelle;GO:0044464//cell part;GO:0005794//Golgi apparatus;GO:0005737//cytoplasm	GO:0003824//catalytic activity;GO:0016740//transferase activity;GO:0003674//molecular_function	GO:0008150//biological_process;GO:0044238//primary metabolic process;GO:0071704//organic substance metabolic process;GO:0008152//metabolic process;GO:0009987//cellular process;GO:0005975//carbohydrate metabolic process
Bra003975	40.3333	141.667	5.41	18.8467	1.80061	0.000583627	0.0126073	yes	-	-	-	-
Bra003979	45.6667	421	4.91	46.24	3.23535	3.50237e-16	6.69345e-14	yes	AT1G69870 (E=1e-132) | proton-dependent oligopeptide transport (POT) family protein	GO:0016020//membrane;GO:0005575//cellular_component	GO:0003674//molecular_function;GO:0005215//transporter activity	GO:0051234//establishment of localization;GO:0006810//transport;GO:0051179//localization;GO:0008150//biological_process
Bra003981	0	7.33333	0.001	1.39	10.4409	0.00320769	0.049274	yes	-	-	-	-
Bra003988	472.333	69.6667	36.8867	5.38	-2.77742	1.72491e-14	2.62432e-12	yes	-	-	-	-
Bra004023	1	10.6667	0.403333	4.22333	3.38834	0.000393695	0.00918877	yes	AT1G68680 (E=6e-027) | unknown protein	GO:0043229//intracellular organelle;GO:0044444//cytoplasmic part;GO:0043226//organelle;GO:0005737//cytoplasm;GO:0043231//intracellular membrane-bounded organelle;GO:0005739//mitochondrion;GO:0044424//intracellular part;GO:0016020//membrane;GO:0005622//intracellular;GO:0009536//plastid;GO:0005575//cellular_component;GO:0044464//cell part;GO:0005623//cell;GO:0043227//membrane-bounded organelle	-	GO:0008152//metabolic process;GO:0009987//cellular process;GO:0008150//biological_process;GO:0009058//biosynthetic process
Bra004024	6.66667	31.6667	1.52667	7.36333	2.26997	0.000428712	0.00977432	yes	AT1G68660 (E=7e-080) | FUNCTIONS IN: molecular_function unknown; INVOLVED IN: protein catabolic process; EXPRESSED IN: 23 plant structures; EXPRESSED DURING: 14 growth stages; CONTAINS InterPro DOMAIN/s: Adaptor protein ClpS, core (InterPro:IPR003769), Ribosomal protein L7/L12, C-terminal/adaptor protein ClpS-like (InterPro:IPR014719); Has 513 Blast hits to 513 proteins in 129 species: Archae - 0…	-	-	GO:0019538//protein metabolic process;GO:0008150//biological_process;GO:0071704//organic substance metabolic process;GO:0044238//primary metabolic process;GO:0008152//metabolic process;GO:0009056//catabolic process;GO:0043170//macromolecule metabolic process
Bra004029	163.667	525.333	9.68667	31.5067	1.70158	1.87969e-07	1.08087e-05	yes	AT1G68580 (E=3e-134) | agenet domain-containing protein / bromo-adjacent homology (BAH) domain-containing protein	-	GO:0003682//chromatin binding;GO:0005488//binding;GO:0003677//DNA binding;GO:0003674//molecular_function;GO:0044877//macromolecular complex binding;GO:1901363//heterocyclic compound binding;GO:0097159//organic cyclic compound binding;GO:0003676//nucleic acid binding	-
Bra004030	22	0	1.34667	0.001	-10.3952	6.06139e-09	4.61191e-07	yes	AT1G68570 (E=1e-299) | proton-dependent oligopeptide transport (POT) family protein	GO:0005575//cellular_component;GO:0016020//membrane	GO:0005215//transporter activity;GO:0003674//molecular_function	GO:0051179//localization;GO:0008150//biological_process;GO:0006810//transport;GO:0051234//establishment of localization
Bra004034	3874.33	968	288.297	72.3067	-1.99535	1.68484e-12	2.11231e-10	yes	AT1G68530 (E=6e-279) CUT1, POP1, CER6, G2, KCS6 | KCS6 (3-KETOACYL-COA SYNTHASE 6); catalytic/ transferase, transferring acyl groups other than amino-acyl groups	GO:0043227//membrane-bounded organelle;GO:0043226//organelle;GO:0005737//cytoplasm;GO:0016020//membrane;GO:0044464//cell part;GO:0012505//endomembrane system;GO:0005575//cellular_component;GO:0005623//cell;GO:0043231//intracellular membrane-bounded organelle;GO:0044444//cytoplasmic part;GO:0005783//endoplasmic reticulum;GO:0005622//intracellular;GO:0043229//intracellular organelle;GO:0044424//int…	GO:0003824//catalytic activity;GO:0016740//transferase activity;GO:0003674//molecular_function	GO:0016043//cellular component organization;GO:0009058//biosynthetic process;GO:0061458//reproductive system development;GO:0032501//multicellular organismal process;GO:0050896//response to stimulus;GO:0006725//cellular aromatic compound metabolic process;GO:0030154//cell differentiation;GO:0009607//response to biotic stimulus;GO:0009056//catabolic process;GO:0009791//post-embryonic development;G…
Bra004052	11.6667	1	1.19667	0.103333	-3.53364	0.000370291	0.00872398	yes	-	-	-	-
Bra004053	838.333	297	50.2633	17.7033	-1.50549	4.62421e-06	0.000192857	yes	AT1G68060 (E=4e-242) ATMAP70-1 | ATMAP70-1 (microtubule-associated proteins 70-1); microtubule binding	-	GO:0005488//binding;GO:0003674//molecular_function;GO:0005515//protein binding	GO:0008150//biological_process;GO:0009987//cellular process;GO:0071840//cellular component organization or biogenesis;GO:0016043//cellular component organization
Bra004057	413	987.51	17.6233	42.11	1.25668	0.00107356	0.0207119	yes	AT3G45140 (E=0.0) LOX2, ATLOX2 | LOX2 (LIPOXYGENASE 2); lipoxygenase	-	GO:0003674//molecular_function;GO:0003824//catalytic activity;GO:0005488//binding;GO:0005515//protein binding	GO:0009987//cellular process;GO:0009058//biosynthetic process;GO:0008150//biological_process;GO:0071704//organic substance metabolic process;GO:0044699//single-organism process;GO:0006629//lipid metabolic process;GO:0044238//primary metabolic process;GO:0008152//metabolic process;GO:0044710//single-organism metabolic process
Bra004058	0.333333	11.12	0.0133333	0.41	4.94251	0.000101871	0.00297633	yes	AT3G45140 (E=0.0) LOX2, ATLOX2 | LOX2 (LIPOXYGENASE 2); lipoxygenase	-	GO:0003674//molecular_function;GO:0005488//binding;GO:0003824//catalytic activity;GO:0005515//protein binding	GO:0009987//cellular process;GO:0044699//single-organism process;GO:0008150//biological_process;GO:0008152//metabolic process;GO:0006629//lipid metabolic process;GO:0009058//biosynthetic process;GO:0071704//organic substance metabolic process;GO:0044710//single-organism metabolic process;GO:0044238//primary metabolic process
Bra004059	0	30.3333	0.001	1.26333	10.303	1.05146e-10	1.02341e-08	yes	AT3G45140 (E=0.0) LOX2, ATLOX2 | LOX2 (LIPOXYGENASE 2); lipoxygenase	-	GO:0003674//molecular_function;GO:0005488//binding;GO:0003824//catalytic activity;GO:0005515//protein binding	GO:0008152//metabolic process;GO:0009987//cellular process;GO:0044699//single-organism process;GO:0071704//organic substance metabolic process;GO:0009058//biosynthetic process;GO:0044238//primary metabolic process;GO:0044710//single-organism metabolic process;GO:0008150//biological_process;GO:0006629//lipid metabolic process
Bra004064	9.33333	36.6667	0.53	2.07	1.96557	0.00297988	0.0465897	yes	-	-	-	-
Bra004066	0.666667	25.6667	0.0933333	3.69	5.30508	4.49867e-08	2.92315e-06	yes	-	-	-	-
Bra004075	626.333	47.6667	117.49	8.55333	-3.77991	2.13682e-19	5.50976e-17	yes	AT1G67740 (E=5e-053) PSBY, YCF32 | PSBY	GO:0005622//intracellular;GO:0005623//cell;GO:0044464//cell part;GO:0009579//thylakoid;GO:0005575//cellular_component;GO:0016020//membrane;GO:0044424//intracellular part	GO:0003674//molecular_function;GO:0005488//binding	GO:0008150//biological_process;GO:0008152//metabolic process;GO:0015979//photosynthesis;GO:0009987//cellular process;GO:0044237//cellular metabolic process
Bra004079	217.333	43.3333	12.5567	2.45	-2.3576	1.24261e-08	8.89232e-07	yes	AT1G67680 (E=2e-274) | 7S RNA binding	GO:0005575//cellular_component;GO:0005622//intracellular;GO:0044424//intracellular part;GO:0005623//cell;GO:0044464//cell part;GO:0005737//cytoplasm	GO:0005488//binding;GO:0097159//organic cyclic compound binding;GO:0003676//nucleic acid binding;GO:0003674//molecular_function;GO:1901363//heterocyclic compound binding;GO:0005515//protein binding;GO:0003723//RNA binding	GO:0051234//establishment of localization;GO:0051179//localization;GO:0071840//cellular component organization or biogenesis;GO:0008150//biological_process;GO:0006810//transport;GO:0016043//cellular component organization;GO:0009987//cellular process
Bra004093	154.667	9.66667	18.75	1.21333	-3.94984	1.07773e-08	7.86843e-07	yes	AT1G67330 (E=4e-140) | unknown protein	-	-	GO:0009058//biosynthetic process;GO:0008152//metabolic process;GO:0008150//biological_process;GO:0005975//carbohydrate metabolic process;GO:0044238//primary metabolic process;GO:0071704//organic substance metabolic process;GO:0009987//cellular process
Bra004106	0.333333	20	0.17	9.81667	5.85163	8.46633e-06	0.000333113	yes	AT1G64750 (E=5e-007) ATDSS1(I) | ATDSS1(I) (ARABIDOPSIS THALIANA DELETION OF SUV3 SUPRESSOR 1(I))	GO:0044464//cell part;GO:0005575//cellular_component;GO:0005622//intracellular;GO:0005623//cell	-	GO:0009987//cellular process;GO:0006810//transport;GO:0051179//localization;GO:0008150//biological_process;GO:0008152//metabolic process;GO:0051234//establishment of localization;GO:0071840//cellular component organization or biogenesis;GO:0016043//cellular component organization
Bra004109	1072.67	8	72.14	0.52	-7.11614	2.92734e-51	5.59449e-48	yes	AT1G65060 (E=1e-253) 4CL3 | 4CL3; 4-coumarate-CoA ligase	-	GO:0003824//catalytic activity;GO:0003674//molecular_function	GO:0048856//anatomical structure development;GO:0008150//biological_process;GO:0044699//single-organism process;GO:0009628//response to abiotic stimulus;GO:0007275//multicellular organism development;GO:0044767//single-organism developmental process;GO:0032502//developmental process;GO:0032501//multicellular organismal process;GO:0071840//cellular component organization or biogenesis;GO:0050896//…
Bra004111	1	9.33333	0.16	1.38	3.10852	0.00173062	0.030132	yes	AT1G43080 (E=9e-123) | glycoside hydrolase family 28 protein / polygalacturonase (pectinase) family protein	GO:0005576//extracellular region;GO:0005575//cellular_component	GO:0003824//catalytic activity;GO:0016787//hydrolase activity;GO:0003674//molecular_function	GO:0008150//biological_process;GO:0071840//cellular component organization or biogenesis;GO:0044238//primary metabolic process;GO:0009987//cellular process;GO:0005975//carbohydrate metabolic process;GO:0016043//cellular component organization;GO:0071704//organic substance metabolic process;GO:0008152//metabolic process
Bra004117	260.333	10.3333	53.62	2.19333	-4.61157	5.21216e-17	1.0925e-14	yes	AT4G20370 (E=2e-085) TSF | TSF (TWIN SISTER OF FT); phosphatidylethanolamine binding	-	GO:0008289//lipid binding;GO:0005488//binding;GO:0003674//molecular_function	GO:0090567//reproductive shoot system development;GO:0003006//developmental process involved in reproduction;GO:0022414//reproductive process;GO:0048856//anatomical structure development;GO:0044767//single-organism developmental process;GO:0009791//post-embryonic development;GO:0009628//response to abiotic stimulus;GO:0044699//single-organism process;GO:0048731//system development;GO:0000003//rep…
Bra004126	1830.67	4113.67	372.793	829.33	1.15357	6.18329e-05	0.00192422	yes	-	-	-	-
Bra004170	133.333	46.6667	22.32	7.88	-1.50207	0.00238644	0.0387707	yes	AT1G66480 (E=8e-090) PMI2 | PMI2 (plastid movement impaired 2)	GO:0005623//cell;GO:0071944//cell periphery;GO:0016020//membrane;GO:0044464//cell part;GO:0005886//plasma membrane;GO:0005575//cellular_component	-	GO:0009987//cellular process;GO:0009058//biosynthetic process;GO:0008150//biological_process;GO:0008152//metabolic process
Bra004171	378.333	21.6667	62.8	3.71	-4.08127	5.48753e-17	1.13738e-14	yes	AT1G66500 (E=3e-051) | zinc finger (C2H2-type) family protein	-	GO:0005488//binding;GO:0003674//molecular_function	-
Bra004179	5.33333	0	0.346667	0.001	-8.43741	0.00160923	0.0284921	yes	AT4G21380 (E=5e-176) ARK3 | ARK3 (A. THALIANA RECEPTOR KINASE 3); kinase/ transmembrane receptor protein serine/threonine kinase	-	GO:0016740//transferase activity;GO:0003674//molecular_function;GO:0003824//catalytic activity;GO:0016301//kinase activity;GO:0016772//transferase activity, transferring phosphorus-containing groups	GO:0022414//reproductive process;GO:0044706//multi-multicellular organism process;GO:0044699//single-organism process;GO:0000003//reproduction;GO:0009856//pollination;GO:0044763//single-organism cellular process;GO:0009875//pollen-pistil interaction;GO:0044703//multi-organism reproductive process;GO:0009987//cellular process;GO:0032501//multicellular organismal process;GO:0051704//multi-organism …
Bra004185	91.6667	1.66667	3.08333	0.06	-5.68338	2.52448e-15	4.22772e-13	yes	AT1G66730 (E=9e-181) | ATP dependent DNA ligase family protein	-	GO:1901265//nucleoside phosphate binding;GO:0097159//organic cyclic compound binding;GO:0016787//hydrolase activity;GO:0005488//binding;GO:0036094//small molecule binding;GO:0000166//nucleotide binding;GO:0003674//molecular_function;GO:0003824//catalytic activity;GO:1901363//heterocyclic compound binding	GO:0009987//cellular process;GO:0044260//cellular macromolecule metabolic process;GO:0008152//metabolic process;GO:0046483//heterocycle metabolic process;GO:0044238//primary metabolic process;GO:0044237//cellular metabolic process;GO:0006950//response to stress;GO:0008150//biological_process;GO:0034641//cellular nitrogen compound metabolic process;GO:0006139//nucleobase-containing compound metabo…
Bra004235	58.6667	139.333	4.45	10.6233	1.25536	0.00166759	0.0292674	yes	-	-	-	-
Bra004237	17.6667	113.953	2.07667	13.0233	2.64876	4.67203e-08	3.0237e-06	yes	-	-	-	-
Bra004241	76.3333	15	7.31	1.43333	-2.3505	2.06685e-05	0.000740352	yes	AT1G67660 (E=5e-102) | DNA binding / nuclease	-	GO:0097159//organic cyclic compound binding;GO:0016787//hydrolase activity;GO:0003677//DNA binding;GO:0004518//nuclease activity;GO:0005488//binding;GO:0003676//nucleic acid binding;GO:0003824//catalytic activity;GO:1901363//heterocyclic compound binding;GO:0016788//hydrolase activity, acting on ester bonds;GO:0003674//molecular_function	GO:1901360//organic cyclic compound metabolic process;GO:0008152//metabolic process;GO:0071704//organic substance metabolic process;GO:0044237//cellular metabolic process;GO:0046483//heterocycle metabolic process;GO:0006807//nitrogen compound metabolic process;GO:0008150//biological_process;GO:0006725//cellular aromatic compound metabolic process;GO:0006139//nucleobase-containing compound metabol…
Bra004262	475.333	7.33333	45.0633	0.686667	-6.0362	4.30766e-34	2.85615e-31	yes	-	-	-	-
Bra004270	558	265.333	24.8733	11.7833	-1.07785	0.000224771	0.00582344	yes	AT1G67950 (E=4e-115) | RNA recognition motif (RRM)-containing protein	-	GO:0003676//nucleic acid binding;GO:0000166//nucleotide binding;GO:1901265//nucleoside phosphate binding;GO:0036094//small molecule binding;GO:1901363//heterocyclic compound binding;GO:0005488//binding;GO:0003674//molecular_function;GO:0097159//organic cyclic compound binding	GO:0009856//pollination;GO:0032501//multicellular organismal process;GO:0044706//multi-multicellular organism process;GO:0000003//reproduction;GO:0044707//single-multicellular organism process;GO:0044699//single-organism process;GO:0022414//reproductive process;GO:0008150//biological_process;GO:0044767//single-organism developmental process;GO:0032502//developmental process;GO:0051704//multi-orga…
Bra004271	33.3333	5	4.71333	0.666667	-2.82171	0.000431066	0.00981423	yes	AT1G67940 (E=2e-127) ATNAP3 | ATNAP3; transporter	GO:0005623//cell;GO:0016020//membrane;GO:0005575//cellular_component;GO:0043226//organelle;GO:0043231//intracellular membrane-bounded organelle;GO:0044444//cytoplasmic part;GO:0005622//intracellular;GO:0005773//vacuole;GO:0044424//intracellular part;GO:0005886//plasma membrane;GO:0043229//intracellular organelle;GO:0005737//cytoplasm;GO:0044464//cell part;GO:0071944//cell periphery;GO:0043227//me…	GO:1901363//heterocyclic compound binding;GO:0005488//binding;GO:0003674//molecular_function;GO:0036094//small molecule binding;GO:0016787//hydrolase activity;GO:0005215//transporter activity;GO:0097159//organic cyclic compound binding;GO:1901265//nucleoside phosphate binding;GO:0000166//nucleotide binding;GO:0003824//catalytic activity	GO:0006810//transport;GO:0051179//localization;GO:0051234//establishment of localization;GO:0008150//biological_process
Bra004284	263.667	79.6667	29.44	8.84333	-1.73512	2.27041e-06	0.000101463	yes	-	-	-	-
Bra004299	14.6667	0	3.03	0.001	-11.5651	1.55882e-06	7.2326e-05	yes	-	-	-	-
Bra004310	979.333	254.333	77.8567	20.1667	-1.94885	2.19186e-11	2.37371e-09	yes	-	-	-	-
Bra004319	1319.09	153.667	52.2967	6.02	-3.11888	6.15725e-15	1.00524e-12	yes	AT1G68560 (E=0.0) ATXYL1, XYL1 | XYL1 (ALPHA-XYLOSIDASE 1); alpha-N-arabinofuranosidase/ hydrolase, hydrolyzing O-glycosyl compounds / xylan 1,4-beta-xylosidase	-	GO:0003674//molecular_function;GO:0030246//carbohydrate binding;GO:0003824//catalytic activity;GO:0005488//binding;GO:0016787//hydrolase activity	GO:0008152//metabolic process;GO:0005975//carbohydrate metabolic process;GO:0071704//organic substance metabolic process;GO:0008150//biological_process;GO:0044238//primary metabolic process
Bra004333	1515.33	66	155.72	6.59	-4.56253	3.0435e-32	1.86567e-29	yes	AT1G68730 (E=6e-053) | zinc finger (DNL type) family protein	-	GO:0005488//binding;GO:0003674//molecular_function	-
Bra004348	108.667	272.667	8.29667	20.8233	1.3276	0.000697247	0.014526	yes	AT1G68920 (E=1e-163) | basic helix-loop-helix (bHLH) family protein	-	GO:0005515//protein binding;GO:0005488//binding;GO:0003674//molecular_function	-
Bra004356	26.3333	81.3333	1.27333	3.97	1.64053	0.00052544	0.0115657	yes	AT1G69020 (E=1e-144) | prolyl oligopeptidase family protein	GO:0009536//plastid;GO:0044424//intracellular part;GO:0043227//membrane-bounded organelle;GO:0043231//intracellular membrane-bounded organelle;GO:0005623//cell;GO:0005622//intracellular;GO:0044464//cell part;GO:0005737//cytoplasm;GO:0043226//organelle;GO:0005575//cellular_component;GO:0044444//cytoplasmic part;GO:0043229//intracellular organelle	GO:0003674//molecular_function;GO:0005488//binding;GO:0005515//protein binding;GO:0003824//catalytic activity;GO:0016787//hydrolase activity	GO:0019538//protein metabolic process;GO:0044238//primary metabolic process;GO:0071704//organic substance metabolic process;GO:0043170//macromolecule metabolic process;GO:0008150//biological_process;GO:0008152//metabolic process
Bra004362	6.33333	0	0.683333	0.001	-9.41645	0.00198056	0.0335227	yes	-	-	-	-
Bra004363	19	3	2.35667	0.356667	-2.7241	0.000907563	0.0180673	yes	AT1G69170 (E=7e-043) | squamosa promoter-binding protein-like 6 (SPL6)	GO:0005622//intracellular;GO:0005634//nucleus;GO:0044424//intracellular part;GO:0005575//cellular_component;GO:0005623//cell;GO:0043226//organelle;GO:0043231//intracellular membrane-bounded organelle;GO:0044464//cell part;GO:0043227//membrane-bounded organelle;GO:0043229//intracellular organelle	GO:0003677//DNA binding;GO:0003674//molecular_function;GO:0097159//organic cyclic compound binding;GO:0003676//nucleic acid binding;GO:0005488//binding;GO:1901363//heterocyclic compound binding	-
Bra004365	66.3333	228.333	3.92333	13.43	1.77531	4.58178e-05	0.00149156	yes	AT1G69200 (E=4e-258) | kinase	GO:0005623//cell;GO:0043229//intracellular organelle;GO:0044424//intracellular part;GO:0044444//cytoplasmic part;GO:0005575//cellular_component;GO:0005622//intracellular;GO:0043226//organelle;GO:0005737//cytoplasm;GO:0043231//intracellular membrane-bounded organelle;GO:0009536//plastid;GO:0043227//membrane-bounded organelle;GO:0044464//cell part	-	GO:0034641//cellular nitrogen compound metabolic process;GO:1901360//organic cyclic compound metabolic process;GO:0071840//cellular component organization or biogenesis;GO:0009058//biosynthetic process;GO:0046483//heterocycle metabolic process;GO:0006807//nitrogen compound metabolic process;GO:0008152//metabolic process;GO:0071704//organic substance metabolic process;GO:0008150//biological_proces…
Bra004376	58	1.66667	6.3	0.173333	-5.18373	1.02268e-11	1.15831e-09	yes	AT1G69370 (E=5e-106) CM3, cm-3 | CM3 (chorismate mutase 3); chorismate mutase	-	GO:0003674//molecular_function;GO:0003824//catalytic activity	GO:0008150//biological_process;GO:0009058//biosynthetic process;GO:0009987//cellular process;GO:0008152//metabolic process
Bra004439	122	11.3333	21.2367	1.98667	-3.41814	6.75712e-09	5.08176e-07	yes	AT2G47670 (E=3e-063) | invertase/pectin methylesterase inhibitor family protein	-	GO:0016787//hydrolase activity;GO:0030234//enzyme regulator activity;GO:0003674//molecular_function;GO:0003824//catalytic activity;GO:0098772//molecular function regulator	GO:0008150//biological_process
Bra004484	4.66667	0	0.13	0.001	-7.02237	0.00238047	0.0387082	yes	AT2G47000 (E=0.0) MDR4, PGP4, ABCB4, ATPGP4 | ABCB4 (ATP BINDING CASSETTE SUBFAMILY B4); ATPase, coupled to transmembrane movement of substances / xenobiotic-transporting ATPase	GO:0016020//membrane;GO:0005575//cellular_component	GO:0005215//transporter activity;GO:1901265//nucleoside phosphate binding;GO:0016787//hydrolase activity;GO:0036094//small molecule binding;GO:0003674//molecular_function;GO:1901363//heterocyclic compound binding;GO:0005488//binding;GO:0000166//nucleotide binding;GO:0003824//catalytic activity;GO:0097159//organic cyclic compound binding	GO:0051234//establishment of localization;GO:0051179//localization;GO:0008150//biological_process;GO:0009987//cellular process;GO:0006810//transport
Bra004488	2	33	0.183333	3.06667	4.06413	1.47031e-06	6.90304e-05	yes	AT3G60960 (E=1e-065) | pentatricopeptide (PPR) repeat-containing protein	-	GO:0005515//protein binding;GO:0005488//binding;GO:0003674//molecular_function	-
Bra004507	233.667	51.6667	20.85	4.63	-2.17096	2.80624e-07	1.55584e-05	yes	AT2G46790 (E=1e-085) APRR9, PRR9, TL1 | APRR9 (ARABIDOPSIS PSEUDO-RESPONSE REGULATOR 9); protein binding / transcription regulator/ two-component response regulator	-	GO:0004871//signal transducer activity;GO:0003677//DNA binding;GO:0097159//organic cyclic compound binding;GO:0005488//binding;GO:0003674//molecular_function;GO:0003676//nucleic acid binding;GO:0005515//protein binding;GO:1901363//heterocyclic compound binding	GO:1901360//organic cyclic compound metabolic process;GO:0006807//nitrogen compound metabolic process;GO:0044763//single-organism cellular process;GO:0007154//cell communication;GO:0051716//cellular response to stimulus;GO:0071704//organic substance metabolic process;GO:0044699//single-organism process;GO:0006139//nucleobase-containing compound metabolic process;GO:0007165//signal transduction;GO…
Bra004518	217.667	1.33333	61.0233	0.403333	-7.24124	4.08285e-25	1.56056e-22	yes	AT2G46650 (E=3e-058) B5 #1, ATCB5-C, CB5-C | CB5-C (CYTOCHROME B5 ISOFORM C); heme binding	-	GO:0005488//binding;GO:0003674//molecular_function	-
Bra004527	1362.67	631.667	127.937	60.2567	-1.08624	0.000424077	0.00970271	yes	-	-	-	-
Bra004538	135	312	13.5967	31.5933	1.21637	0.0022262	0.0366398	yes	-	-	-	-
Bra004541	90.6667	28.3333	4.97333	1.51	-1.71966	0.000731308	0.0151506	yes	-	-	-	-
Bra004558	31.6667	0.666667	3.26333	0.0666667	-5.61324	9.82056e-08	5.97491e-06	yes	-	-	-	-
Bra004564	302.333	72.3333	51.8367	12.3767	-2.06635	1.92285e-06	8.78642e-05	yes	AT2G46150 (E=3e-077) | FUNCTIONS IN: molecular_function unknown; INVOLVED IN: biological_process unknown; LOCATED IN: plasma membrane; EXPRESSED IN: 15 plant structures; EXPRESSED DURING: 7 growth stages; CONTAINS InterPro DOMAIN/s: Harpin-induced 1 (InterPro:IPR010847); BEST Arabidopsis thaliana protein match is: unknown protein (TAIR:AT3G54200.1); Has 137 Blast hits to 136 proteins in 12 specie…	GO:0005575//cellular_component;GO:0005886//plasma membrane;GO:0005623//cell;GO:0016020//membrane;GO:0071944//cell periphery;GO:0044464//cell part	-	-
Bra004571	172.333	6.33333	10.3833	0.363333	-4.83683	3.64234e-18	8.33353e-16	yes	AT2G40460 (E=1e-187) | proton-dependent oligopeptide transport (POT) family protein	GO:0005575//cellular_component;GO:0016020//membrane	GO:0003674//molecular_function;GO:0005215//transporter activity	GO:0006810//transport;GO:0051179//localization;GO:0008150//biological_process;GO:0051234//establishment of localization
Bra004626	42.3333	163.667	1.04333	4.14	1.98843	1.55351e-05	0.000578143	yes	AT2G41520 (E=1e-277) | DNAJ heat shock N-terminal domain-containing protein	GO:0043226//organelle;GO:0005575//cellular_component;GO:0005737//cytoplasm;GO:0043231//intracellular membrane-bounded organelle;GO:0009536//plastid;GO:0044464//cell part;GO:0043227//membrane-bounded organelle;GO:0005622//intracellular;GO:0043229//intracellular organelle;GO:0044424//intracellular part;GO:0005623//cell;GO:0044444//cytoplasmic part	GO:0005515//protein binding;GO:0003824//catalytic activity;GO:0003674//molecular_function;GO:1901265//nucleoside phosphate binding;GO:0036094//small molecule binding;GO:1901363//heterocyclic compound binding;GO:0097159//organic cyclic compound binding;GO:0000166//nucleotide binding;GO:0005488//binding	GO:0009987//cellular process;GO:0008152//metabolic process;GO:0008150//biological_process
Bra004642	23.6667	233	1.04333	10.4433	3.32331	2.99008e-12	3.59795e-10	yes	AT2G41720 (E=0.0) EMB2654 | EMB2654 (EMBRYO DEFECTIVE 2654)	-	GO:0003674//molecular_function;GO:0005488//binding;GO:0005515//protein binding	-
Bra004668	92	14	12.8	1.89333	-2.75714	7.30031e-08	4.54367e-06	yes	AT2G42070 (E=3e-118) ATNUDT23, ATNUDX23 | ATNUDX23 (ARABIDOPSIS THALIANA NUDIX HYDROLASE HOMOLOG 23); FAD diphosphatase/ hydrolase	-	GO:0003824//catalytic activity;GO:0003674//molecular_function;GO:0016787//hydrolase activity	-
Bra004676	29.6667	329.667	1.77333	19.8033	3.48121	1.11547e-14	1.75075e-12	yes	AT2G42230 (E=3e-207) | tubulin-specific chaperone C-related	-	-	GO:0016043//cellular component organization;GO:0009987//cellular process;GO:0032502//developmental process;GO:0048856//anatomical structure development;GO:0008150//biological_process;GO:0071840//cellular component organization or biogenesis;GO:0009653//anatomical structure morphogenesis
Bra004720	203.333	23	14.6	1.73333	-3.07435	2.29623e-09	1.87443e-07	yes	AT2G42790 (E=4e-271) CSY3 | CSY3 (citrate synthase 3); citrate (SI)-synthase	GO:0005623//cell;GO:0005737//cytoplasm;GO:0005622//intracellular;GO:0043231//intracellular membrane-bounded organelle;GO:0005777//peroxisome;GO:0005575//cellular_component;GO:0043226//organelle;GO:0044444//cytoplasmic part;GO:0042579//microbody;GO:0044464//cell part;GO:0043229//intracellular organelle;GO:0044424//intracellular part;GO:0043227//membrane-bounded organelle	GO:0016740//transferase activity;GO:0003674//molecular_function;GO:0003824//catalytic activity	GO:0006950//response to stress;GO:0043170//macromolecule metabolic process;GO:0009056//catabolic process;GO:0016043//cellular component organization;GO:0044238//primary metabolic process;GO:0071840//cellular component organization or biogenesis;GO:0006629//lipid metabolic process;GO:0009987//cellular process;GO:0005975//carbohydrate metabolic process;GO:0006091//generation of precursor metabolite…
Bra004726	237	44.6667	36.8267	6.99333	-2.3967	9.4736e-10	8.14253e-08	yes	AT2G42670 (E=5e-122) | unknown protein	-	GO:0003674//molecular_function;GO:0003824//catalytic activity	GO:0008150//biological_process;GO:0008152//metabolic process
Bra004728	24	196	1.17	9.81667	3.06872	3.53383e-09	2.78666e-07	yes	AT2G42890 (E=8e-167) AML2 | AML2 (ARABIDOPSIS-MEI2-LIKE 2); RNA binding / nucleic acid binding / nucleotide binding	-	GO:0097159//organic cyclic compound binding;GO:0005488//binding;GO:0003676//nucleic acid binding;GO:0000166//nucleotide binding;GO:0003674//molecular_function;GO:1901363//heterocyclic compound binding;GO:1901265//nucleoside phosphate binding;GO:0036094//small molecule binding	-
Bra004737	1078.33	499.333	81.7233	37.55	-1.12194	5.14218e-05	0.00165083	yes	AT2G43020 (E=7e-280) ATPAO2 | ATPAO2 (Polyamine oxidase 2); amine oxidase/ electron carrier/ oxidoreductase	-	GO:0003674//molecular_function;GO:0003824//catalytic activity	GO:0008150//biological_process;GO:0008152//metabolic process
Bra004740	402	174	94.7633	41.4467	-1.19307	0.00212379	0.0353845	yes	AT2G43060 (E=7e-051) | transcription factor	-	GO:0005488//binding;GO:0003674//molecular_function;GO:0005515//protein binding	-
Bra004745	60.3333	180.333	7.72667	23.7633	1.62082	0.000228271	0.00589529	yes	-	-	-	-
Bra004755	23.6667	1.33333	2.00333	0.103333	-4.27702	2.28243e-05	0.000812201	yes	AT2G43260 (E=5e-162) | F-box family protein / S locus-related	-	GO:0003674//molecular_function;GO:0005488//binding;GO:0005515//protein binding	-
Bra004774	158	25.6667	16.4767	2.73667	-2.58993	6.99236e-08	4.36875e-06	yes	AT4G38940 (E=5e-066) | kelch repeat-containing F-box family protein	-	GO:0003674//molecular_function;GO:0005515//protein binding;GO:0005488//binding	-
Bra004776	465	203	26.9067	11.9967	-1.16533	0.00180539	0.0311333	yes	AT2G43680 (E=1e-141) IQD14 | IQD14; calmodulin binding	-	GO:0005515//protein binding;GO:0003674//molecular_function;GO:0005488//binding	-
Bra004784	19.3333	170.667	1.82	15.8567	3.12308	3.19256e-10	2.8812e-08	yes	AT2G43790 (E=1e-220) ATMPK6, MPK6, MAPK6 | ATMPK6 (ARABIDOPSIS THALIANA MAP KINASE 6); MAP kinase/ kinase	-	GO:0016740//transferase activity;GO:0036094//small molecule binding;GO:0016772//transferase activity, transferring phosphorus-containing groups;GO:0005488//binding;GO:0003674//molecular_function;GO:0003824//catalytic activity;GO:0097159//organic cyclic compound binding;GO:1901265//nucleoside phosphate binding;GO:1901363//heterocyclic compound binding;GO:0016301//kinase activity;GO:0000166//nucleo…	GO:0044699//single-organism process;GO:0044763//single-organism cellular process;GO:0044267//cellular protein metabolic process;GO:0065007//biological regulation;GO:0008150//biological_process;GO:0043170//macromolecule metabolic process;GO:0023052//signaling;GO:0009987//cellular process;GO:0007154//cell communication;GO:0051716//cellular response to stimulus;GO:0043412//macromolecule modification…
Bra004797	21.3333	3.66667	1.54333	0.256667	-2.58808	0.000578995	0.0125323	yes	AT2G43990 (E=8e-067) | unknown protein	-	-	GO:0022414//reproductive process;GO:0044260//cellular macromolecule metabolic process;GO:0071704//organic substance metabolic process;GO:0048608//reproductive structure development;GO:0032502//developmental process;GO:0044238//primary metabolic process;GO:0006464//cellular protein modification process;GO:0044702//single organism reproductive process;GO:0043412//macromolecule modification;GO:00905…
Bra004807	25.3333	3	2.14	0.246667	-3.11698	6.37973e-05	0.00198156	yes	AT2G44130 (E=1e-095) | kelch repeat-containing F-box family protein	-	GO:0005488//binding;GO:0003674//molecular_function;GO:0005515//protein binding	-
Bra004835	128	486	9.46333	35.8533	1.92169	1.09839e-08	8.00122e-07	yes	AT2G44450 (E=9e-265) BGLU15 | BGLU15 (BETA GLUCOSIDASE 15); catalytic/ cation binding / hydrolase, hydrolyzing O-glycosyl compounds	-	GO:0003824//catalytic activity;GO:0003674//molecular_function;GO:0016787//hydrolase activity	GO:0071704//organic substance metabolic process;GO:0008152//metabolic process;GO:0005975//carbohydrate metabolic process;GO:0008150//biological_process;GO:0044238//primary metabolic process
Bra004837	221.667	867.667	7.05	26.9067	1.93227	2.58239e-07	1.44157e-05	yes	AT2G44460 (E=6e-267) BGLU28 | BGLU28 (BETA GLUCOSIDASE 28); catalytic/ cation binding / hydrolase, hydrolyzing O-glycosyl compounds	GO:0016020//membrane;GO:0005575//cellular_component	GO:0003824//catalytic activity;GO:0016787//hydrolase activity;GO:0003674//molecular_function	GO:0005975//carbohydrate metabolic process;GO:0008152//metabolic process;GO:0071704//organic substance metabolic process;GO:0008150//biological_process;GO:0044238//primary metabolic process
Bra004843	53.3333	164.667	11.4167	35.7767	1.64788	0.000232009	0.0059587	yes	-	-	-	-
Bra004844	0	23.6667	0.001	1.82333	10.8324	4.13305e-09	3.20474e-07	yes	AT2G44560 (E=2e-212) AtGH9B11 | AtGH9B11 (Arabidopsis thaliana glycosyl hydrolase 9B11); catalytic/ hydrolase, hydrolyzing O-glycosyl compounds	-	GO:0016787//hydrolase activity;GO:0003824//catalytic activity;GO:0003674//molecular_function	GO:0071704//organic substance metabolic process;GO:0009056//catabolic process;GO:0008152//metabolic process;GO:0044238//primary metabolic process;GO:0005975//carbohydrate metabolic process;GO:0009987//cellular process;GO:0008150//biological_process
Bra004846	163	29.6667	12.9433	2.37667	-2.4452	3.11922e-05	0.00107125	yes	AT2G44560 (E=2e-220) AtGH9B11 | AtGH9B11 (Arabidopsis thaliana glycosyl hydrolase 9B11); catalytic/ hydrolase, hydrolyzing O-glycosyl compounds	-	GO:0016787//hydrolase activity;GO:0003824//catalytic activity;GO:0003674//molecular_function	GO:0044238//primary metabolic process;GO:0008150//biological_process;GO:0009056//catabolic process;GO:0005975//carbohydrate metabolic process;GO:0008152//metabolic process;GO:0071704//organic substance metabolic process;GO:0009987//cellular process
Bra004859	97.6667	363	11.92	44.12	1.88805	2.61921e-08	1.76547e-06	yes	AT2G44730 (E=1e-046) | transcription factor	-	GO:0003674//molecular_function;GO:0044877//macromolecular complex binding;GO:0003682//chromatin binding;GO:0005488//binding	-
Bra004872	298.667	115.667	15.9667	6.1	-1.38818	9.23091e-05	0.00273136	yes	AT2G44830 (E=5e-262) | protein kinase, putative	-	GO:1901363//heterocyclic compound binding;GO:0036094//small molecule binding;GO:0097159//organic cyclic compound binding;GO:0016740//transferase activity;GO:1901265//nucleoside phosphate binding;GO:0003824//catalytic activity;GO:0005488//binding;GO:0016301//kinase activity;GO:0016772//transferase activity, transferring phosphorus-containing groups;GO:0000166//nucleotide binding;GO:0003674//molecu…	GO:0071704//organic substance metabolic process;GO:0044267//cellular protein metabolic process;GO:0044237//cellular metabolic process;GO:0006464//cellular protein modification process;GO:0044260//cellular macromolecule metabolic process;GO:0036211//protein modification process;GO:0019538//protein metabolic process;GO:0044238//primary metabolic process;GO:0009987//cellular process;GO:0008152//meta…
Bra004874	89.3333	25	11.3667	3.11	-1.86982	0.000517282	0.0114171	yes	AT2G44910 (E=2e-088) ATHB4, ATHB-4 | ATHB4 (ARABIDOPSIS THALIANA HOMEOBOX-LEUCINE ZIPPER PROTEIN 4); DNA binding / transcription factor	GO:0044424//intracellular part;GO:0005634//nucleus;GO:0043229//intracellular organelle;GO:0005623//cell;GO:0043226//organelle;GO:0005622//intracellular;GO:0005575//cellular_component;GO:0043227//membrane-bounded organelle;GO:0044464//cell part;GO:0043231//intracellular membrane-bounded organelle	GO:0097159//organic cyclic compound binding;GO:1901363//heterocyclic compound binding;GO:0001071//nucleic acid binding transcription factor activity;GO:0003674//molecular_function;GO:0003676//nucleic acid binding;GO:0003677//DNA binding;GO:0003700//transcription factor activity, sequence-specific DNA binding;GO:0005488//binding	GO:0034641//cellular nitrogen compound metabolic process;GO:0006139//nucleobase-containing compound metabolic process;GO:0006807//nitrogen compound metabolic process;GO:0046483//heterocycle metabolic process;GO:0044238//primary metabolic process;GO:0009987//cellular process;GO:0008152//metabolic process;GO:0044237//cellular metabolic process;GO:0006725//cellular aromatic compound metabolic proces…
Bra004898	1281.33	583.667	64.7967	29.6433	-1.12821	0.000116929	0.00334412	yes	AT2G45290 (E=0.0) | transketolase, putative	GO:0043231//intracellular membrane-bounded organelle;GO:0044444//cytoplasmic part;GO:0044464//cell part;GO:0009536//plastid;GO:0043229//intracellular organelle;GO:0005622//intracellular;GO:0043226//organelle;GO:0043227//membrane-bounded organelle;GO:0044424//intracellular part;GO:0005737//cytoplasm;GO:0005575//cellular_component;GO:0005623//cell	GO:0016740//transferase activity;GO:0003674//molecular_function;GO:0003824//catalytic activity	GO:0008152//metabolic process;GO:0008150//biological_process
Bra004907	2.33333	16.6667	0.28	2.02333	2.85324	0.000413301	0.00952998	yes	AT2G45400 (E=2e-132) BEN1 | BEN1; binding / catalytic/ coenzyme binding / oxidoreductase, acting on CH-OH group of donors	-	GO:0003824//catalytic activity;GO:0005488//binding;GO:0003674//molecular_function	GO:0009987//cellular process;GO:0008150//biological_process;GO:0008152//metabolic process
Bra004915	1000.33	386.333	91.3867	34.49	-1.40581	9.96265e-05	0.00291863	yes	AT2G45470 (E=2e-155) FLA8, AGP8 | FLA8 (FASCICLIN-LIKE ARABINOGALACTAN PROTEIN 8)	GO:0005623//cell;GO:0071944//cell periphery;GO:0005575//cellular_component;GO:0016020//membrane;GO:0030312//external encapsulating structure;GO:0005886//plasma membrane;GO:0005576//extracellular region;GO:0044464//cell part;GO:0005618//cell wall	-	-
Bra004921	26	4	1.86667	0.276667	-2.75424	0.000200831	0.00530042	yes	AT2G45580 (E=1e-212) CYP76C3 | CYP76C3; electron carrier/ heme binding / iron ion binding / monooxygenase/ oxygen binding	-	GO:0005488//binding;GO:0003824//catalytic activity;GO:0003674//molecular_function	GO:0008150//biological_process;GO:0008152//metabolic process
Bra004942	12	0	0.65	0.001	-9.3443	0.000747386	0.015378	yes	-	-	-	-
Bra004954	305.333	96.3333	41.5633	13.2033	-1.65441	3.13146e-06	0.00013547	yes	AT2G45990 (E=2e-136) | unknown protein	GO:0043229//intracellular organelle;GO:0009536//plastid;GO:0043227//membrane-bounded organelle;GO:0043231//intracellular membrane-bounded organelle;GO:0043226//organelle;GO:0044424//intracellular part;GO:0005575//cellular_component;GO:0005623//cell;GO:0044444//cytoplasmic part;GO:0005737//cytoplasm;GO:0044464//cell part;GO:0005622//intracellular	-	GO:0008152//metabolic process;GO:0015979//photosynthesis;GO:0009058//biosynthetic process;GO:0071840//cellular component organization or biogenesis;GO:0008150//biological_process;GO:0016043//cellular component organization;GO:0044237//cellular metabolic process;GO:0006091//generation of precursor metabolites and energy;GO:0009987//cellular process
Bra004955	54	1.66667	9.83	0.273333	-5.16846	2.95091e-11	3.12287e-09	yes	-	-	-	-
Bra004966	265	1512.33	17.9533	103.83	2.5319	4.96243e-11	5.05406e-09	yes	AT2G40370 (E=2e-283) LAC5 | LAC5 (laccase 5); laccase	GO:0005576//extracellular region;GO:0005575//cellular_component	GO:0003674//molecular_function;GO:0003824//catalytic activity;GO:0005488//binding	GO:0044710//single-organism metabolic process;GO:0019748//secondary metabolic process;GO:0008150//biological_process;GO:0009987//cellular process;GO:0009056//catabolic process;GO:0044699//single-organism process;GO:0008152//metabolic process
Bra005013	148.333	47.3333	22.0533	6.82	-1.69315	0.000134507	0.00374187	yes	AT2G39795 (E=2e-093) | mitochondrial glycoprotein family protein / MAM33 family protein	GO:0043226//organelle;GO:0005739//mitochondrion;GO:0043227//membrane-bounded organelle;GO:0005575//cellular_component;GO:0044444//cytoplasmic part;GO:0005622//intracellular;GO:0043229//intracellular organelle;GO:0044464//cell part;GO:0043231//intracellular membrane-bounded organelle;GO:0044424//intracellular part;GO:0005623//cell;GO:0005737//cytoplasm	-	-
Bra005018	1130.33	522.333	60.7233	27.9567	-1.11906	0.000123721	0.00348856	yes	AT2G39750 (E=0.0) | dehydration-responsive family protein	-	GO:0003824//catalytic activity;GO:0003674//molecular_function;GO:0016740//transferase activity	GO:0008150//biological_process;GO:0008152//metabolic process
Bra005019	382.54	97.7267	30.0667	7.55333	-1.99298	1.27552e-08	9.08778e-07	yes	AT2G39730 (E=2e-259) RCA | RCA (RUBISCO ACTIVASE); ADP binding / ATP binding / enzyme regulator/ ribulose-1,5-bisphosphate carboxylase/oxygenase activator	-	GO:0097159//organic cyclic compound binding;GO:1901363//heterocyclic compound binding;GO:0003674//molecular_function;GO:1901265//nucleoside phosphate binding;GO:0036094//small molecule binding;GO:0000166//nucleotide binding;GO:0005488//binding	-
Bra005020	259.667	85	28.5467	9.12667	-1.64516	5.02572e-05	0.00162307	yes	AT2G39720 (E=7e-079) RHC2A | RHC2A; protein binding / zinc ion binding	-	GO:0005515//protein binding;GO:0003674//molecular_function;GO:0005488//binding	-
Bra005023	93.47	8.68667	14.37	1.27667	-3.49261	1.4643e-09	1.23247e-07	yes	AT1G53750 (E=8e-136) RPT1A | RPT1A (REGULATORY PARTICLE TRIPLE-A 1A); ATPase	-	GO:1901265//nucleoside phosphate binding;GO:0003674//molecular_function;GO:0097159//organic cyclic compound binding;GO:0005488//binding;GO:0000166//nucleotide binding;GO:0016787//hydrolase activity;GO:1901363//heterocyclic compound binding;GO:0036094//small molecule binding;GO:0003824//catalytic activity	-
Bra005031	54.3333	160.667	6.07333	17.8667	1.55671	0.000133621	0.00372333	yes	AT2G39550 (E=2e-172) ATGGT-IB, GGB, PGGT-I | PGGT-I; CAAX-protein geranylgeranyltransferase/ protein heterodimerization	-	GO:0016740//transferase activity;GO:0003674//molecular_function;GO:0003824//catalytic activity	GO:0065007//biological regulation;GO:0044260//cellular macromolecule metabolic process;GO:0007154//cell communication;GO:0051716//cellular response to stimulus;GO:0009628//response to abiotic stimulus;GO:0006464//cellular protein modification process;GO:0044700//single organism signaling;GO:0009719//response to endogenous stimulus;GO:0071704//organic substance metabolic process;GO:0050896//respon…
Bra005033	2159.52	6204.33	207.72	623.793	1.58643	7.04838e-05	0.00215019	yes	AT2G39510 (E=2e-189) | nodulin MtN21 family protein	GO:0005575//cellular_component;GO:0016020//membrane	GO:0005215//transporter activity;GO:0003674//molecular_function	GO:0008150//biological_process;GO:0051179//localization;GO:0009987//cellular process;GO:0006810//transport;GO:0051234//establishment of localization
Bra005050	184.667	431.5	6.82	16.01	1.23113	0.000168955	0.00455177	yes	-	-	-	-
Bra005052	184.667	431.5	6.82	16.01	1.23113	0.00016897	0.00455177	yes	-	-	-	-
Bra005061	106.333	33.3333	8.44	2.64667	-1.67307	0.000410788	0.0094855	yes	AT2G39130 (E=1e-212) | amino acid transporter family protein	GO:0016020//membrane;GO:0005575//cellular_component	-	-
Bra005104	12.6667	0.333333	0.97	0.0233333	-5.37752	0.00215844	0.0357916	yes	AT2G38470 (E=3e-093) WRKY33, ATWRKY33 | WRKY33; transcription factor	-	GO:0003674//molecular_function;GO:1901363//heterocyclic compound binding;GO:0003676//nucleic acid binding;GO:0003677//DNA binding;GO:0005488//binding;GO:0003700//transcription factor activity, sequence-specific DNA binding;GO:0097159//organic cyclic compound binding;GO:0001071//nucleic acid binding transcription factor activity	GO:0008152//metabolic process;GO:0046483//heterocycle metabolic process;GO:0044238//primary metabolic process;GO:1901360//organic cyclic compound metabolic process;GO:0009058//biosynthetic process;GO:0008150//biological_process;GO:0071704//organic substance metabolic process;GO:0034641//cellular nitrogen compound metabolic process;GO:0009987//cellular process;GO:0006807//nitrogen compound metabol…
Bra005137	431.667	110.333	32.2033	8.22	-1.97	1.47036e-08	1.03399e-06	yes	AT2G38110 (E=2e-251) ATGPAT6, GPAT6 | GPAT6 (GLYCEROL-3-PHOSPHATE ACYLTRANSFERASE 6); 1-acylglycerol-3-phosphate O-acyltransferase/ acyltransferase	-	GO:0016740//transferase activity;GO:0003674//molecular_function;GO:0003824//catalytic activity	GO:0008152//metabolic process;GO:0008150//biological_process
Bra005142	4.33333	0	0.45	0.001	-8.81378	0.00303842	0.0473177	yes	AT4G38940 (E=2e-066) | kelch repeat-containing F-box family protein	-	GO:0005488//binding;GO:0003674//molecular_function;GO:0005515//protein binding	-
Bra005143	52.3333	166	2.60667	8.81333	1.75748	0.00128291	0.0238327	yes	-	-	-	-
Bra005146	10	0.666667	1.08333	0.0833333	-3.70044	0.000312835	0.00761326	yes	-	-	-	-
Bra005169	0	6.33333	0.001	0.373333	8.54432	0.000282327	0.00695943	yes	AT2G37700 (E=5e-233) | catalytic/ iron ion binding / oxidoreductase	GO:0016020//membrane;GO:0005575//cellular_component	GO:0003824//catalytic activity;GO:0005488//binding;GO:0003674//molecular_function	GO:0009058//biosynthetic process;GO:0009987//cellular process;GO:0044699//single-organism process;GO:0071704//organic substance metabolic process;GO:0006629//lipid metabolic process;GO:0008150//biological_process;GO:0044710//single-organism metabolic process;GO:0008152//metabolic process;GO:0044238//primary metabolic process
Bra005177	20	114	2.06	11.7467	2.51154	7.36331e-08	4.57412e-06	yes	AT2G37630 (E=1e-161) ATPHAN, AS1, ATMYB91, MYB91 | AS1 (ASYMMETRIC LEAVES 1); DNA binding / protein homodimerization/ transcription factor	GO:0044464//cell part;GO:0043226//organelle;GO:0005622//intracellular;GO:0005634//nucleus;GO:0005575//cellular_component;GO:0043229//intracellular organelle;GO:0043227//membrane-bounded organelle;GO:0005623//cell;GO:0044424//intracellular part;GO:0043231//intracellular membrane-bounded organelle	GO:0003682//chromatin binding;GO:0003676//nucleic acid binding;GO:1901363//heterocyclic compound binding;GO:0003674//molecular_function;GO:0097159//organic cyclic compound binding;GO:0005488//binding;GO:0003677//DNA binding;GO:0044877//macromolecular complex binding	GO:0006139//nucleobase-containing compound metabolic process;GO:0009987//cellular process;GO:0032501//multicellular organismal process;GO:0009058//biosynthetic process;GO:0044699//single-organism process;GO:0034641//cellular nitrogen compound metabolic process;GO:0006807//nitrogen compound metabolic process;GO:0006725//cellular aromatic compound metabolic process;GO:0044237//cellular metabolic pr…
Bra005192	5.66667	0	0.696667	0.001	-9.44432	0.00291013	0.0457426	yes	-	-	-	-
Bra005201	26.3333	4.33333	3.66333	0.586667	-2.64254	0.0011876	0.0224456	yes	AT2G37390 (E=2e-085) | heavy-metal-associated domain-containing protein	-	GO:0005488//binding;GO:0003674//molecular_function	GO:0051234//establishment of localization;GO:0051179//localization;GO:0006810//transport;GO:0008150//biological_process
Bra005207	44.6667	150.527	1.17	3.92333	1.74557	3.33517e-05	0.00113344	yes	AT2G37280 (E=0.0) PDR5, ATPDR5 | PDR5 (PLEIOTROPIC DRUG RESISTANCE 5); ATPase, coupled to transmembrane movement of substances	GO:0005575//cellular_component;GO:0016020//membrane	GO:0003824//catalytic activity;GO:0097159//organic cyclic compound binding;GO:0016787//hydrolase activity;GO:0000166//nucleotide binding;GO:1901265//nucleoside phosphate binding;GO:0036094//small molecule binding;GO:0003674//molecular_function;GO:0005488//binding;GO:1901363//heterocyclic compound binding	-
Bra005208	1663	4171.47	43.42	108.453	1.32064	3.12922e-06	0.00013547	yes	AT2G37280 (E=0.0) PDR5, ATPDR5 | PDR5 (PLEIOTROPIC DRUG RESISTANCE 5); ATPase, coupled to transmembrane movement of substances	GO:0016020//membrane;GO:0005575//cellular_component	GO:0003674//molecular_function;GO:0000166//nucleotide binding;GO:1901265//nucleoside phosphate binding;GO:0036094//small molecule binding;GO:0016787//hydrolase activity;GO:0097159//organic cyclic compound binding;GO:0003824//catalytic activity;GO:0005488//binding;GO:1901363//heterocyclic compound binding	-
Bra005210	74.3333	5.66667	6.54667	0.513333	-3.67279	1.48235e-08	1.04018e-06	yes	AT2G37260 (E=8e-101) TTG2, ATWRKY44, WRKY44, DSL1 | TTG2 (TRANSPARENT TESTA GLABRA 2); transcription factor	-	GO:0003674//molecular_function;GO:0097159//organic cyclic compound binding;GO:0001071//nucleic acid binding transcription factor activity;GO:0003676//nucleic acid binding;GO:0005488//binding;GO:0003700//transcription factor activity, sequence-specific DNA binding;GO:0003677//DNA binding;GO:1901363//heterocyclic compound binding	GO:0009987//cellular process;GO:0071704//organic substance metabolic process;GO:0044238//primary metabolic process;GO:0034641//cellular nitrogen compound metabolic process;GO:0006139//nucleobase-containing compound metabolic process;GO:0009058//biosynthetic process;GO:0006725//cellular aromatic compound metabolic process;GO:0008150//biological_process;GO:0044237//cellular metabolic process;GO:190…
Bra005212	158	356	20.57	45.82	1.15544	0.000539055	0.0118334	yes	AT2G37220 (E=1e-097) | 29 kDa ribonucleoprotein, chloroplast, putative / RNA-binding protein cp29, putative	-	GO:1901265//nucleoside phosphate binding;GO:0000166//nucleotide binding;GO:0003674//molecular_function;GO:0036094//small molecule binding;GO:0003676//nucleic acid binding;GO:0005488//binding;GO:1901363//heterocyclic compound binding;GO:0097159//organic cyclic compound binding	-
Bra005221	4532.33	284.333	456.64	28.1133	-4.02173	2.18301e-24	8.05951e-22	yes	AT2G37040 (E=6e-113) pal1, ATPAL1 | pal1 (Phe ammonia lyase 1); phenylalanine ammonia-lyase	-	GO:0003674//molecular_function;GO:0003824//catalytic activity	GO:0009058//biosynthetic process;GO:0008152//metabolic process;GO:0008150//biological_process
Bra005229	6.33333	0	0.463333	0.001	-8.85591	0.00291066	0.0457426	yes	AT2G36970 (E=8e-247) | UDP-glucoronosyl/UDP-glucosyl transferase family protein	-	GO:0016740//transferase activity;GO:0003824//catalytic activity;GO:0003674//molecular_function	GO:0008152//metabolic process;GO:0008150//biological_process
Bra005242	0	9.66667	0.001	0.72	9.49185	0.000144705	0.00398417	yes	AT2G36800 (E=5e-244) DOGT1, UGT73C5 | DOGT1 (DON-GLUCOSYLTRANSFERASE 1); UDP-glycosyltransferase/ cis-zeatin O-beta-D-glucosyltransferase/ glucosyltransferase/ quercetin 4'-O-glucosyltransferase/ quercetin 7-O-glucosyltransferase/ trans-zeatin O-beta-D-glucosyltransferase/ transferase, transf	-	GO:0003824//catalytic activity;GO:0016740//transferase activity;GO:0003674//molecular_function	GO:0008150//biological_process;GO:0008152//metabolic process
Bra005243	9.66667	0	0.743333	0.001	-9.53787	0.00011929	0.00339074	yes	AT2G36770 (E=4e-209) | UDP-glucoronosyl/UDP-glucosyl transferase family protein	-	GO:0016740//transferase activity;GO:0003674//molecular_function;GO:0003824//catalytic activity	GO:0008150//biological_process;GO:0008152//metabolic process
Bra005282	22.6667	144.333	5.29333	32.9833	2.63949	8.44357e-08	5.17591e-06	yes	AT2G36320 (E=1e-065) | zinc finger (AN1-like) family protein	-	GO:0003676//nucleic acid binding;GO:0003677//DNA binding;GO:1901363//heterocyclic compound binding;GO:0003674//molecular_function;GO:0005488//binding;GO:0097159//organic cyclic compound binding	-
Bra005312	194.333	76.3333	14.74	5.57667	-1.40226	0.00157115	0.0279393	yes	AT2G35710 (E=2e-261) | glycogenin glucosyltransferase (glycogenin)-related	-	GO:0003674//molecular_function;GO:0003824//catalytic activity;GO:0016740//transferase activity	-
Bra005314	38.6667	135	7.18333	24.64	1.77828	0.000239218	0.00608609	yes	AT2G35700 (E=4e-068) ATERF38, ERF38 | ERF38 (ERF FAMILY PROTEIN 38); DNA binding / transcription factor	GO:0005634//nucleus;GO:0043226//organelle;GO:0043229//intracellular organelle;GO:0005575//cellular_component;GO:0005623//cell;GO:0043227//membrane-bounded organelle;GO:0005622//intracellular;GO:0044464//cell part;GO:0043231//intracellular membrane-bounded organelle;GO:0044424//intracellular part	GO:0003677//DNA binding;GO:0005488//binding;GO:0003674//molecular_function;GO:0003700//transcription factor activity, sequence-specific DNA binding;GO:1901363//heterocyclic compound binding;GO:0001071//nucleic acid binding transcription factor activity;GO:0097159//organic cyclic compound binding;GO:0003676//nucleic acid binding	GO:0044238//primary metabolic process;GO:0009987//cellular process;GO:0006725//cellular aromatic compound metabolic process;GO:0044237//cellular metabolic process;GO:1901360//organic cyclic compound metabolic process;GO:0008150//biological_process;GO:0006807//nitrogen compound metabolic process;GO:0009058//biosynthetic process;GO:0046483//heterocycle metabolic process;GO:0071704//organic substanc…
Bra005333	0	11.3333	0.001	4.6	12.1674	1.003e-05	0.000388398	yes	-	-	-	-
Bra005338	68.3333	10.3333	13.15	1.97667	-2.73392	1.15176e-06	5.55184e-05	yes	-	-	-	-
Bra005341	1.33333	101.667	0.133333	10.8833	6.35094	3.70143e-17	7.85986e-15	yes	AT2G35450 (E=5e-173) | catalytic/ hydrolase	GO:0005623//cell;GO:0044424//intracellular part;GO:0005622//intracellular;GO:0043229//intracellular organelle;GO:0005575//cellular_component;GO:0005737//cytoplasm;GO:0044444//cytoplasmic part;GO:0043231//intracellular membrane-bounded organelle;GO:0043227//membrane-bounded organelle;GO:0043226//organelle;GO:0009536//plastid;GO:0044464//cell part	GO:0003824//catalytic activity;GO:0016787//hydrolase activity;GO:0003674//molecular_function	GO:0008152//metabolic process;GO:0008150//biological_process
Bra005375	141.667	31.6667	17.07	3.64	-2.22945	4.76218e-06	0.000198357	yes	AT2G34990 (E=4e-071) | zinc finger (C3HC4-type RING finger) family protein	-	GO:0005488//binding;GO:0003674//molecular_function;GO:0005515//protein binding	GO:0006810//transport;GO:0051234//establishment of localization;GO:0051179//localization;GO:0008150//biological_process
Bra005384	867.667	387.667	51.51	22.5833	-1.18959	0.00136221	0.024913	yes	AT2G34890 (E=1e-279) | CTP synthase, putative / UTP--ammonia ligase, putative	-	GO:0003674//molecular_function;GO:0005488//binding;GO:0003824//catalytic activity;GO:0036094//small molecule binding;GO:0097159//organic cyclic compound binding;GO:1901265//nucleoside phosphate binding;GO:0000166//nucleotide binding;GO:1901363//heterocyclic compound binding	GO:0008150//biological_process;GO:1901360//organic cyclic compound metabolic process;GO:0046483//heterocycle metabolic process;GO:0006139//nucleobase-containing compound metabolic process;GO:0008152//metabolic process;GO:0009987//cellular process;GO:0044238//primary metabolic process;GO:0071704//organic substance metabolic process;GO:0006725//cellular aromatic compound metabolic process;GO:004423…
Bra005398	81.3333	233.667	3.48	9.85667	1.50201	0.00125858	0.0235406	yes	AT2G34710 (E=0.0) PHB, ATHB14, ATHB-14, PHB-1D | PHB (PHABULOSA); DNA binding / transcription factor	GO:0044424//intracellular part;GO:0043227//membrane-bounded organelle;GO:0043226//organelle;GO:0043229//intracellular organelle;GO:0005634//nucleus;GO:0044464//cell part;GO:0005623//cell;GO:0005575//cellular_component;GO:0043231//intracellular membrane-bounded organelle;GO:0005622//intracellular	GO:0097159//organic cyclic compound binding;GO:1901363//heterocyclic compound binding;GO:0003700//transcription factor activity, sequence-specific DNA binding;GO:0003676//nucleic acid binding;GO:0008289//lipid binding;GO:0003677//DNA binding;GO:0003674//molecular_function;GO:0005488//binding;GO:0001071//nucleic acid binding transcription factor activity	GO:1901360//organic cyclic compound metabolic process;GO:0046483//heterocycle metabolic process;GO:0044237//cellular metabolic process;GO:0006139//nucleobase-containing compound metabolic process;GO:0034641//cellular nitrogen compound metabolic process;GO:0071704//organic substance metabolic process;GO:0006725//cellular aromatic compound metabolic process;GO:0008150//biological_process;GO:0008152…
Bra005399	58	0	12.3133	0.001	-13.5879	1.17359e-14	1.81565e-12	yes	AT2G34700 (E=5e-079) | pollen Ole e 1 allergen and extensin family protein	-	GO:0003674//molecular_function;GO:0005198//structural molecule activity	-
Bra005400	37.3333	0.333333	2.60667	0.0233333	-6.80367	8.49207e-12	9.68066e-10	yes	AT1G58260 (E=2e-221) CYP79C2, CYP79C3P | CYP79C2 (CYTOCHROME P450 79C2); electron carrier/ heme binding / iron ion binding / monooxygenase/ oxygen binding	-	GO:0003674//molecular_function;GO:0003824//catalytic activity;GO:0005488//binding	GO:0008152//metabolic process;GO:0008150//biological_process
Bra005409	22.3333	2.33333	4.55667	0.466667	-3.28751	0.00239928	0.0389258	yes	-	-	-	-
Bra005420	32	192	2.4	14.1967	2.56445	8.70109e-10	7.4984e-08	yes	AT2G34500 (E=2e-226) CYP710A1 | CYP710A1 (cytochrome P450, family 710, subfamily A, polypeptide 1); C-22 sterol desaturase/ oxygen binding	-	GO:0003674//molecular_function;GO:0003824//catalytic activity;GO:0005488//binding	GO:0008150//biological_process;GO:0008152//metabolic process
Bra005424	466.113	110.373	108.187	24.7133	-2.13016	2.20987e-08	1.52111e-06	yes	AT2G34430 (E=1e-089) LHB1B1, LHCB1.4 | LHB1B1; chlorophyll binding	GO:0009536//plastid;GO:0005737//cytoplasm;GO:0043229//intracellular organelle;GO:0016020//membrane;GO:0043226//organelle;GO:0044464//cell part;GO:0005622//intracellular;GO:0005575//cellular_component;GO:0009579//thylakoid;GO:0043231//intracellular membrane-bounded organelle;GO:0044424//intracellular part;GO:0043227//membrane-bounded organelle;GO:0005623//cell;GO:0044444//cytoplasmic part	GO:0005488//binding;GO:0003674//molecular_function	GO:0044237//cellular metabolic process;GO:0015979//photosynthesis;GO:0044267//cellular protein metabolic process;GO:0071704//organic substance metabolic process;GO:0043412//macromolecule modification;GO:0044238//primary metabolic process;GO:0044260//cellular macromolecule metabolic process;GO:0043170//macromolecule metabolic process;GO:0036211//protein modification process;GO:0006091//generation …
Bra005425	128.293	2378.55	17.9633	325.657	4.18022	2.90642e-32	1.8159e-29	yes	AT2G34430 (E=2e-149) LHB1B1, LHCB1.4 | LHB1B1; chlorophyll binding	GO:0044444//cytoplasmic part;GO:0043229//intracellular organelle;GO:0005575//cellular_component;GO:0043227//membrane-bounded organelle;GO:0009536//plastid;GO:0009579//thylakoid;GO:0044424//intracellular part;GO:0043231//intracellular membrane-bounded organelle;GO:0016020//membrane;GO:0005737//cytoplasm;GO:0043226//organelle;GO:0044464//cell part;GO:0005623//cell;GO:0005622//intracellular	GO:0005488//binding;GO:0003674//molecular_function	GO:0006091//generation of precursor metabolites and energy;GO:0006464//cellular protein modification process;GO:0015979//photosynthesis;GO:0043170//macromolecule metabolic process;GO:0044238//primary metabolic process;GO:0009987//cellular process;GO:0008150//biological_process;GO:0008152//metabolic process;GO:0044267//cellular protein metabolic process;GO:0043412//macromolecule modification;GO:00…
Bra005457	528.333	192.333	51.58	19.3133	-1.41721	0.00018807	0.00500427	yes	-	-	-	-
Bra005472	186	38.6667	37.9333	7.85	-2.2727	1.95795e-05	0.000706016	yes	-	-	-	-
Bra005485	13.6667	65.6667	1.30667	6.28	2.26487	0.000155838	0.00425464	yes	AT2G33560 (E=2e-163) | spindle checkpoint protein-related	-	-	GO:0044238//primary metabolic process;GO:0071840//cellular component organization or biogenesis;GO:0008152//metabolic process;GO:0044763//single-organism cellular process;GO:0016043//cellular component organization;GO:0044699//single-organism process;GO:0071704//organic substance metabolic process;GO:0009056//catabolic process;GO:0043170//macromolecule metabolic process;GO:0007049//cell cycle;GO:…
Bra005498	16.3333	0	2.27667	0.001	-11.1527	1.97535e-05	0.000711499	yes	-	-	-	-
Bra005521	42.3333	0	1.82	0.001	-10.8297	1.97755e-12	2.43365e-10	yes	AT1G04700 (E=6e-160) | protein kinase family protein	-	GO:0003674//molecular_function;GO:1901363//heterocyclic compound binding;GO:1901265//nucleoside phosphate binding;GO:0016740//transferase activity;GO:0005488//binding;GO:0036094//small molecule binding;GO:0000166//nucleotide binding;GO:0005515//protein binding;GO:0003824//catalytic activity;GO:0016301//kinase activity;GO:0016772//transferase activity, transferring phosphorus-containing groups;GO:…	GO:0009987//cellular process;GO:0043412//macromolecule modification;GO:0036211//protein modification process;GO:0019538//protein metabolic process;GO:0008150//biological_process;GO:0044267//cellular protein metabolic process;GO:0008152//metabolic process;GO:0044238//primary metabolic process;GO:0044237//cellular metabolic process;GO:0044260//cellular macromolecule metabolic process;GO:0071704//or…
Bra005535	5	43.3333	0.313333	2.71333	3.1143	3.58155e-07	1.95237e-05	yes	-	-	-	-
Bra005538	2.66667	49.6667	0.506667	9.62667	4.24793	9.60381e-06	0.000374123	yes	-	-	-	-
Bra005539	352.333	98.6667	19.95	5.61667	-1.8286	6.65176e-07	3.39794e-05	yes	-	-	-	-
Bra005552	0.333333	49.6667	0.0233333	3.1	7.05373	1.82077e-13	2.4855e-11	yes	AT2G32850 (E=5e-177) | protein kinase family protein	-	GO:0016772//transferase activity, transferring phosphorus-containing groups;GO:1901363//heterocyclic compound binding;GO:0016740//transferase activity;GO:0003674//molecular_function;GO:0016301//kinase activity;GO:0005488//binding;GO:0000166//nucleotide binding;GO:0003824//catalytic activity;GO:0097159//organic cyclic compound binding;GO:1901265//nucleoside phosphate binding;GO:0036094//small mole…	GO:0071704//organic substance metabolic process;GO:0008152//metabolic process;GO:0006464//cellular protein modification process;GO:0044238//primary metabolic process;GO:0008150//biological_process;GO:0043412//macromolecule modification;GO:0043170//macromolecule metabolic process;GO:0044260//cellular macromolecule metabolic process;GO:0019538//protein metabolic process;GO:0044237//cellular metabol…
Bra005564	259.333	77.6667	70.2967	21.4667	-1.71136	6.35105e-06	0.00025857	yes	AT2G32720 (E=7e-062) B5 #4, ATCB5-B, CB5-B | CB5-B (CYTOCHROME B5 ISOFORM B); heme binding	-	GO:0005488//binding;GO:0003674//molecular_function	-
Bra005565	104	32.3333	16.9767	5.30667	-1.67768	0.000165543	0.00447449	yes	AT2G32710 (E=8e-029) KRP4, ACK2, ICK7 | KRP4; cyclin binding / cyclin-dependent protein kinase inhibitor	GO:0005575//cellular_component;GO:0005622//intracellular;GO:0043226//organelle;GO:0043229//intracellular organelle;GO:0043231//intracellular membrane-bounded organelle;GO:0044464//cell part;GO:0005634//nucleus;GO:0044424//intracellular part;GO:0005623//cell;GO:0043227//membrane-bounded organelle	GO:0098772//molecular function regulator;GO:0030234//enzyme regulator activity;GO:0003674//molecular_function	GO:0044699//single-organism process;GO:0044763//single-organism cellular process;GO:0009987//cellular process;GO:0008150//biological_process;GO:0007049//cell cycle
Bra005585	0.666667	10	0.103333	1.46667	3.82716	0.000594123	0.0128	yes	AT2G32350 (E=3e-124) | FUNCTIONS IN: molecular_function unknown; INVOLVED IN: protein modification process; LOCATED IN: cellular_component unknown; EXPRESSED IN: flower; EXPRESSED DURING: petal differentiation and expansion stage; CONTAINS InterPro DOMAIN/s: Ubiquitin (InterPro:IPR000626); BEST Arabidopsis thaliana protein match is: ubiquitin family protein (TAIR:AT4G05230.1); Has 132 Blast hits …	-	GO:0005515//protein binding;GO:0003674//molecular_function;GO:0005488//binding	-
Bra005610	856.667	378.333	57.69	24.1067	-1.25889	0.001699	0.0297087	yes	AT2G32120 (E=7e-258) HSP70T-2 | HSP70T-2 (HEAT-SHOCK PROTEIN 70T-2); ATP binding	-	GO:1901265//nucleoside phosphate binding;GO:0097159//organic cyclic compound binding;GO:0036094//small molecule binding;GO:0000166//nucleotide binding;GO:0003674//molecular_function;GO:0005488//binding;GO:1901363//heterocyclic compound binding	GO:0050896//response to stimulus;GO:0009987//cellular process;GO:0009628//response to abiotic stimulus;GO:0006950//response to stress;GO:0008150//biological_process
Bra005622	5.66667	0.333333	0.78	0.0533333	-3.87036	0.00300796	0.046967	yes	AT2G31960 (E=2e-048) ATGSL03, GSL03, ATGSL3 | ATGSL03 (GLUCAN SYNTHASE-LIKE 3); 1,3-beta-glucan synthase/ transferase, transferring glycosyl groups	-	GO:0003674//molecular_function;GO:0003824//catalytic activity;GO:0016740//transferase activity	-
Bra005638	97.3333	431.667	3.13667	13.9467	2.15262	1.87558e-10	1.74601e-08	yes	AT2G31830 (E=0.0) | endonuclease/exonuclease/phosphatase family protein	-	GO:0003674//molecular_function;GO:0005198//structural molecule activity;GO:0005515//protein binding;GO:0005488//binding	GO:0008152//metabolic process;GO:0044238//primary metabolic process;GO:0044710//single-organism metabolic process;GO:0009987//cellular process;GO:0044699//single-organism process;GO:0008150//biological_process;GO:0071704//organic substance metabolic process;GO:0006629//lipid metabolic process
Bra005640	68.6667	186.333	5.63333	15.41	1.45181	0.000210237	0.00549509	yes	AT2G31810 (E=7e-138) | acetolactate synthase small subunit, putative	-	GO:0003674//molecular_function;GO:0016740//transferase activity;GO:0003824//catalytic activity;GO:0005488//binding	GO:0009987//cellular process;GO:0009058//biosynthetic process;GO:0008150//biological_process;GO:0008152//metabolic process
Bra005641	25	1	2.11667	0.0866667	-4.61017	1.04159e-06	5.08114e-05	yes	AT2G31790 (E=3e-216) | UDP-glucoronosyl/UDP-glucosyl transferase family protein	-	GO:0003824//catalytic activity;GO:0016740//transferase activity;GO:0003674//molecular_function	GO:0008150//biological_process;GO:0008152//metabolic process
Bra005685	673.667	176	55.79	14.7067	-1.92354	3.17645e-10	2.87464e-08	yes	AT5G01450 (E=2e-213) | protein binding / zinc ion binding	-	GO:0005488//binding;GO:0005515//protein binding;GO:0003674//molecular_function	GO:0008150//biological_process;GO:0071840//cellular component organization or biogenesis;GO:0009987//cellular process;GO:0044763//single-organism cellular process;GO:0007049//cell cycle;GO:0044699//single-organism process;GO:0016043//cellular component organization
Bra005725	5.66667	27	0.503333	2.57	2.35218	0.00131244	0.0242271	yes	AT5G02460 (E=3e-107) | Dof-type zinc finger domain-containing protein	-	GO:0005488//binding;GO:0097159//organic cyclic compound binding;GO:0003676//nucleic acid binding;GO:1901363//heterocyclic compound binding;GO:0003674//molecular_function;GO:0003677//DNA binding	GO:0009987//cellular process;GO:0044237//cellular metabolic process;GO:0044238//primary metabolic process;GO:0046483//heterocycle metabolic process;GO:0008152//metabolic process;GO:0006139//nucleobase-containing compound metabolic process;GO:0034641//cellular nitrogen compound metabolic process;GO:0006807//nitrogen compound metabolic process;GO:0006725//cellular aromatic compound metabolic proces…
Bra005841	110.667	11.6667	14.2733	1.47333	-3.27617	0.00011133	0.00320941	yes	-	-	-	-
Bra005938	17.6967	1.17333	3.60333	0.216667	-4.05578	0.000110933	0.0032008	yes	AT5G07470 (E=5e-081) PMSR3, ATMSRA3 | PMSR3 (PEPTIDEMETHIONINE SULFOXIDE REDUCTASE 3); oxidoreductase, acting on sulfur group of donors, disulfide as acceptor / peptide-methionine-(S)-S-oxide reductase	-	GO:0003824//catalytic activity;GO:0003674//molecular_function	GO:0009987//cellular process;GO:0044238//primary metabolic process;GO:0019538//protein metabolic process;GO:0043170//macromolecule metabolic process;GO:0071704//organic substance metabolic process;GO:0008150//biological_process;GO:0006950//response to stress;GO:0008152//metabolic process;GO:0050896//response to stimulus
Bra005939	79.8133	11.3867	15.9467	2.31667	-2.78313	1.09014e-07	6.58322e-06	yes	AT5G07470 (E=3e-079) PMSR3, ATMSRA3 | PMSR3 (PEPTIDEMETHIONINE SULFOXIDE REDUCTASE 3); oxidoreductase, acting on sulfur group of donors, disulfide as acceptor / peptide-methionine-(S)-S-oxide reductase	-	GO:0003674//molecular_function;GO:0003824//catalytic activity	GO:0009987//cellular process;GO:0006950//response to stress;GO:0044238//primary metabolic process;GO:0050896//response to stimulus;GO:0008152//metabolic process;GO:0043170//macromolecule metabolic process;GO:0071704//organic substance metabolic process;GO:0008150//biological_process;GO:0019538//protein metabolic process
Bra005955	84.6667	6	6.41333	0.44	-3.8655	1.0806e-06	5.23214e-05	yes	AT5G07820 (E=1e-057) | FUNCTIONS IN: molecular_function unknown; INVOLVED IN: biological_process unknown; LOCATED IN: cellular_component unknown; EXPRESSED IN: 11 plant structures; EXPRESSED DURING: 8 growth stages; CONTAINS InterPro DOMAIN/s: Calmodulin-binding, plant (InterPro:IPR012417); BEST Arabidopsis thaliana protein match is: chromosome scaffold protein-related (TAIR:AT5G61260.1); Has 109…	-	GO:0003674//molecular_function;GO:0005488//binding;GO:0005515//protein binding	-
Bra006016	18.6667	120.667	1.39667	9.37667	2.74709	4.76924e-07	2.53183e-05	yes	AT5G09220 (E=2e-245) AAP2 | AAP2 (AMINO ACID PERMEASE 2); amino acid transmembrane transporter	GO:0016020//membrane;GO:0005575//cellular_component	-	-
Bra006059	117	29.3333	9.15667	2.22	-2.04426	0.000240993	0.00612494	yes	AT5G44050 (E=7e-233) | MATE efflux family protein	GO:0016020//membrane;GO:0005575//cellular_component	GO:0003674//molecular_function;GO:0005215//transporter activity	GO:0051179//localization;GO:0051234//establishment of localization;GO:0008150//biological_process;GO:0006810//transport;GO:0009987//cellular process
Bra006095	6.33333	0	0.236667	0.001	-7.88671	0.000487473	0.0108625	yes	AT5G11250 (E=0.0) | disease resistance protein (TIR-NBS-LRR class), putative	-	GO:1901265//nucleoside phosphate binding;GO:0016787//hydrolase activity;GO:1901363//heterocyclic compound binding;GO:0097159//organic cyclic compound binding;GO:0036094//small molecule binding;GO:0003824//catalytic activity;GO:0000166//nucleotide binding;GO:0005488//binding;GO:0003674//molecular_function	GO:0050896//response to stimulus;GO:0008150//biological_process;GO:0006950//response to stress
Bra006126	39.6667	174.667	7.21333	32.5033	2.17185	2.74067e-06	0.000119841	yes	AT5G11900 (E=1e-104) | eukaryotic translation initiation factor SUI1 family protein	GO:0005737//cytoplasm;GO:0044424//intracellular part;GO:0043226//organelle;GO:0043229//intracellular organelle;GO:0030529//intracellular ribonucleoprotein complex;GO:0005840//ribosome;GO:1990904//ribonucleoprotein complex;GO:0005575//cellular_component;GO:0043228//non-membrane-bounded organelle;GO:0043232//intracellular non-membrane-bounded organelle;GO:0032991//macromolecular complex;GO:0044444/…	GO:1901363//heterocyclic compound binding;GO:0008135//translation factor activity, RNA binding;GO:0003674//molecular_function;GO:0003676//nucleic acid binding;GO:0003723//RNA binding;GO:0097159//organic cyclic compound binding;GO:0005488//binding	GO:0044237//cellular metabolic process;GO:0044249//cellular biosynthetic process;GO:0044238//primary metabolic process;GO:0034641//cellular nitrogen compound metabolic process;GO:0044260//cellular macromolecule metabolic process;GO:0044271//cellular nitrogen compound biosynthetic process;GO:0019538//protein metabolic process;GO:0009058//biosynthetic process;GO:0006412//translation;GO:1901564//org…
Bra006127	908.333	98	115.407	12.2967	-3.23039	6.58011e-23	2.18144e-20	yes	-	-	-	-
Bra006143	213.667	92.3333	63.9467	26.9333	-1.24748	0.000844944	0.0169558	yes	AT5G12190 (E=2e-064) | RNA recognition motif (RRM)-containing protein	-	GO:0097159//organic cyclic compound binding;GO:1901265//nucleoside phosphate binding;GO:0005488//binding;GO:0003676//nucleic acid binding;GO:1901363//heterocyclic compound binding;GO:0036094//small molecule binding;GO:0003674//molecular_function;GO:0000166//nucleotide binding	-
Bra006146	502.333	0	16.0667	0.001	-13.9718	6.84037e-36	5.42041e-33	yes	AT5G11250 (E=6e-206) | disease resistance protein (TIR-NBS-LRR class), putative	-	GO:0000166//nucleotide binding;GO:0005515//protein binding;GO:0036094//small molecule binding;GO:0003824//catalytic activity;GO:0005488//binding;GO:0097159//organic cyclic compound binding;GO:1901363//heterocyclic compound binding;GO:0003674//molecular_function;GO:0016787//hydrolase activity;GO:1901265//nucleoside phosphate binding	GO:0050896//response to stimulus;GO:0051716//cellular response to stimulus;GO:0008150//biological_process;GO:0007154//cell communication;GO:0023052//signaling;GO:0050794//regulation of cellular process;GO:0044699//single-organism process;GO:0007165//signal transduction;GO:0006950//response to stress;GO:0065007//biological regulation;GO:0044763//single-organism cellular process;GO:0044700//single …
Bra006151	139	21.6667	8.2	1.26333	-2.69839	2.43734e-05	0.000856072	yes	-	-	-	-
Bra006152	58.3333	192	4.08667	13.5367	1.72788	1.75245e-05	0.000641163	yes	-	-	-	-
Bra006155	102.667	0.666667	12.4133	0.0933333	-7.05528	1.65116e-13	2.27307e-11	yes	AT4G22050 (E=4e-080) | aspartyl protease family protein	-	GO:0016787//hydrolase activity;GO:0003824//catalytic activity;GO:0003674//molecular_function	GO:0008152//metabolic process;GO:0044238//primary metabolic process;GO:0019538//protein metabolic process;GO:0071704//organic substance metabolic process;GO:0043170//macromolecule metabolic process;GO:0008150//biological_process
Bra006184	24.3333	4.33333	1.97667	0.36	-2.457	0.00171685	0.0299886	yes	AT5G13160 (E=5e-197) PBS1 | PBS1 (avrPphB susceptible 1); kinase/ protein serine/threonine kinase	-	GO:0000166//nucleotide binding;GO:0003824//catalytic activity;GO:0003674//molecular_function;GO:0016772//transferase activity, transferring phosphorus-containing groups;GO:0036094//small molecule binding;GO:0005488//binding;GO:0016740//transferase activity;GO:0097159//organic cyclic compound binding;GO:1901265//nucleoside phosphate binding;GO:0016301//kinase activity;GO:1901363//heterocyclic comp…	GO:0044238//primary metabolic process;GO:0008150//biological_process;GO:0009987//cellular process;GO:0019538//protein metabolic process;GO:0008152//metabolic process;GO:0044267//cellular protein metabolic process;GO:0044237//cellular metabolic process;GO:0043412//macromolecule modification;GO:0006464//cellular protein modification process;GO:0036211//protein modification process;GO:0043170//macro…
Bra006185	40.3333	157.333	4.61333	17.97	1.96171	0.000464829	0.0104295	yes	AT5G13170 (E=8e-116) SAG29 | SAG29 (SENESCENCE-ASSOCIATED PROTEIN 29)	GO:0044464//cell part;GO:0005623//cell;GO:0005575//cellular_component;GO:0005886//plasma membrane;GO:0016020//membrane;GO:0071944//cell periphery	-	GO:0051234//establishment of localization;GO:0006810//transport;GO:0051179//localization;GO:0008150//biological_process
Bra006195	117.667	37.3333	16.85	5.58333	-1.59355	0.001527	0.0273338	yes	AT5G13330 (E=1e-058) Rap2.6L | Rap2.6L (related to AP2 6L); DNA binding / transcription factor	GO:0005622//intracellular;GO:0043231//intracellular membrane-bounded organelle;GO:0044464//cell part;GO:0043227//membrane-bounded organelle;GO:0005575//cellular_component;GO:0005634//nucleus;GO:0005623//cell;GO:0043226//organelle;GO:0043229//intracellular organelle;GO:0044424//intracellular part	GO:0097159//organic cyclic compound binding;GO:0005488//binding;GO:0003677//DNA binding;GO:1901363//heterocyclic compound binding;GO:0003674//molecular_function;GO:0001071//nucleic acid binding transcription factor activity;GO:0003700//transcription factor activity, sequence-specific DNA binding;GO:0003676//nucleic acid binding	GO:0009058//biosynthetic process;GO:1901360//organic cyclic compound metabolic process;GO:0006725//cellular aromatic compound metabolic process;GO:0009987//cellular process;GO:0008150//biological_process;GO:0034641//cellular nitrogen compound metabolic process;GO:0006139//nucleobase-containing compound metabolic process;GO:0071704//organic substance metabolic process;GO:0046483//heterocycle metab…
Bra006197	1063	227	89.6067	19.31	-2.21426	4.80517e-14	6.93845e-12	yes	AT5G13420 (E=5e-198) | transaldolase, putative	GO:0005622//intracellular;GO:0005623//cell;GO:0044464//cell part;GO:0005737//cytoplasm;GO:0005575//cellular_component;GO:0044424//intracellular part	GO:0003824//catalytic activity;GO:0016740//transferase activity;GO:0003674//molecular_function	GO:0006807//nitrogen compound metabolic process;GO:0006725//cellular aromatic compound metabolic process;GO:0005975//carbohydrate metabolic process;GO:0006139//nucleobase-containing compound metabolic process;GO:0008152//metabolic process;GO:0044237//cellular metabolic process;GO:0034641//cellular nitrogen compound metabolic process;GO:0044238//primary metabolic process;GO:1901360//organic cyclic…
Bra006198	147.333	48.6667	19.7633	6.39	-1.62894	0.000152618	0.00418079	yes	AT5G13440 (E=3e-137) | ubiquinol-cytochrome C reductase iron-sulfur subunit, mitochondrial, putative / Rieske iron-sulfur protein, putative	GO:0043226//organelle;GO:0005737//cytoplasm;GO:0016020//membrane;GO:0005623//cell;GO:0005622//intracellular;GO:0044444//cytoplasmic part;GO:0044464//cell part;GO:0005739//mitochondrion;GO:0005575//cellular_component;GO:0043231//intracellular membrane-bounded organelle;GO:0043227//membrane-bounded organelle;GO:0043229//intracellular organelle;GO:0044424//intracellular part	GO:0005488//binding;GO:0005215//transporter activity;GO:0003674//molecular_function;GO:0003824//catalytic activity	GO:0008150//biological_process;GO:0008152//metabolic process
Bra006205	1385.33	359.333	32.18	8.21	-1.97071	1.28125e-11	1.43046e-09	yes	AT5G13530 (E=0.0) KEG | KEG (KEEP ON GOING); protein binding / protein kinase/ ubiquitin-protein ligase	GO:0005575//cellular_component;GO:0044424//intracellular part;GO:0043229//intracellular organelle;GO:0044464//cell part;GO:0005623//cell;GO:0005622//intracellular;GO:0044444//cytoplasmic part;GO:0005794//Golgi apparatus;GO:0005737//cytoplasm;GO:0043226//organelle;GO:0012505//endomembrane system;GO:0043227//membrane-bounded organelle;GO:0043231//intracellular membrane-bounded organelle	GO:1901265//nucleoside phosphate binding;GO:0036094//small molecule binding;GO:0016301//kinase activity;GO:0003824//catalytic activity;GO:0016740//transferase activity;GO:0097159//organic cyclic compound binding;GO:1901363//heterocyclic compound binding;GO:0016772//transferase activity, transferring phosphorus-containing groups;GO:0003674//molecular_function;GO:0005515//protein binding;GO:0000166…	GO:1901360//organic cyclic compound metabolic process;GO:0008150//biological_process;GO:0009056//catabolic process;GO:0006464//cellular protein modification process;GO:0007154//cell communication;GO:0006725//cellular aromatic compound metabolic process;GO:0050794//regulation of cellular process;GO:0009987//cellular process;GO:0044700//single organism signaling;GO:0006950//response to stress;GO:00…
Bra006210	303.667	54.3333	23.8633	4.35333	-2.4546	2.83813e-09	2.27113e-07	yes	AT5G13700 (E=9e-237) ATPAO1, APAO, PAO1 | ATPAO1 (ARABIDOPSIS THALIANA POLYAMINE OXIDASE 1); FAD binding / polyamine oxidase	-	GO:1901363//heterocyclic compound binding;GO:0003674//molecular_function;GO:0036094//small molecule binding;GO:1901265//nucleoside phosphate binding;GO:0000166//nucleotide binding;GO:0005488//binding;GO:0003824//catalytic activity;GO:0097159//organic cyclic compound binding	GO:0008152//metabolic process;GO:0009056//catabolic process;GO:0008150//biological_process;GO:0009987//cellular process
Bra006215	709	346.333	54.4633	26.3167	-1.04931	0.000989143	0.0193826	yes	-	-	-	-
Bra006216	234.667	108.333	33.36	15.0733	-1.14612	0.00294375	0.0461358	yes	AT5G13810 (E=2e-118) | glutaredoxin family protein	-	GO:0003674//molecular_function;GO:0003824//catalytic activity	GO:0044763//single-organism cellular process;GO:0009987//cellular process;GO:0044699//single-organism process;GO:0065008//regulation of biological quality;GO:0008150//biological_process;GO:0019725//cellular homeostasis;GO:0065007//biological regulation;GO:0042592//homeostatic process
Bra006219	511.667	256.667	39.1167	19.0833	-1.03547	0.00115867	0.0220141	yes	AT5G13840 (E=2e-235) FZR3 | FZR3 (FIZZY-RELATED 3); signal transducer	-	GO:0003674//molecular_function;GO:0005488//binding;GO:0098772//molecular function regulator;GO:0005515//protein binding;GO:0030234//enzyme regulator activity	GO:0044267//cellular protein metabolic process;GO:0010468//regulation of gene expression;GO:0006139//nucleobase-containing compound metabolic process;GO:0090304//nucleic acid metabolic process;GO:0040007//growth;GO:0009653//anatomical structure morphogenesis;GO:0019538//protein metabolic process;GO:0071840//cellular component organization or biogenesis;GO:0016049//cell growth;GO:0016043//cellular…
Bra006224	10284.7	2.66667	969.417	0.27	-11.8099	4.02676e-70	1.63532e-66	yes	AT5G13930 (E=2e-216) CHS, TT4, ATCHS | TT4 (TRANSPARENT TESTA 4); naringenin-chalcone synthase	-	GO:0003824//catalytic activity;GO:0003674//molecular_function;GO:0016740//transferase activity	GO:0008152//metabolic process;GO:0008150//biological_process;GO:0009058//biosynthetic process
Bra006225	8.66667	61.6667	1.43333	10.4367	2.86421	0.000696928	0.014526	yes	-	-	-	-
Bra006244	126	477.667	6.27	23.1533	1.88468	0.000293435	0.00720591	yes	AT5G14230 (E=0.0) | protein binding	-	GO:0003674//molecular_function;GO:0005488//binding;GO:0005515//protein binding	-
Bra006245	67	13	9.53333	1.90333	-2.32445	1.61234e-05	0.000595941	yes	-	-	-	-
Bra006256	42.3333	162.333	3.98	15.45	1.95677	0.000619807	0.0132219	yes	AT5G14480 (E=8e-218) | glycosyl transferase family 17 protein	GO:0005575//cellular_component;GO:0016020//membrane	GO:0003824//catalytic activity;GO:0016740//transferase activity;GO:0003674//molecular_function	GO:0044237//cellular metabolic process;GO:0044267//cellular protein metabolic process;GO:0009987//cellular process;GO:0044238//primary metabolic process;GO:0008150//biological_process;GO:0019538//protein metabolic process;GO:0043412//macromolecule modification;GO:0043170//macromolecule metabolic process;GO:0009058//biosynthetic process;GO:0008152//metabolic process;GO:0005975//carbohydrate metabo…
Bra006262	524.333	171.333	39.7067	13.02	-1.60865	1.50116e-06	7.01746e-05	yes	AT5G14590 (E=3e-250) | isocitrate dehydrogenase, putative / NADP+ isocitrate dehydrogenase, putative	GO:0005737//cytoplasm;GO:0005575//cellular_component;GO:0044444//cytoplasmic part;GO:0005739//mitochondrion;GO:0044464//cell part;GO:0043229//intracellular organelle;GO:0043226//organelle;GO:0043227//membrane-bounded organelle;GO:0005623//cell;GO:0044424//intracellular part;GO:0005622//intracellular;GO:0009579//thylakoid;GO:0043231//intracellular membrane-bounded organelle;GO:0009536//plastid	GO:1901363//heterocyclic compound binding;GO:0097159//organic cyclic compound binding;GO:0000166//nucleotide binding;GO:0036094//small molecule binding;GO:0003674//molecular_function;GO:1901265//nucleoside phosphate binding;GO:0005488//binding;GO:0003824//catalytic activity	GO:0008150//biological_process;GO:0008152//metabolic process;GO:0044237//cellular metabolic process;GO:0006091//generation of precursor metabolites and energy;GO:0009987//cellular process
Bra006263	800.52	293.613	70.8133	26.3067	-1.42859	2.72761e-05	0.000946767	yes	AT5G14640 (E=2e-234) ATSK13, SK13 | SK13 (SHAGGY-LIKE KINASE 13); ATP binding / protein kinase/ protein serine/threonine kinase	GO:0005829//cytosol;GO:0005623//cell;GO:0005575//cellular_component;GO:0005737//cytoplasm;GO:0044424//intracellular part;GO:0044444//cytoplasmic part;GO:0044464//cell part;GO:0005622//intracellular	GO:0003674//molecular_function;GO:0016772//transferase activity, transferring phosphorus-containing groups;GO:0036094//small molecule binding;GO:0000166//nucleotide binding;GO:1901265//nucleoside phosphate binding;GO:0016740//transferase activity;GO:1901363//heterocyclic compound binding;GO:0097159//organic cyclic compound binding;GO:0016301//kinase activity;GO:0005488//binding;GO:0003824//cataly…	GO:0019538//protein metabolic process;GO:0044238//primary metabolic process;GO:0071704//organic substance metabolic process;GO:0008150//biological_process;GO:0043170//macromolecule metabolic process;GO:0044260//cellular macromolecule metabolic process;GO:0006464//cellular protein modification process;GO:0044267//cellular protein metabolic process;GO:0008152//metabolic process;GO:0043412//macromol…
Bra006266	2.33333	22.1667	0.553333	5.22667	3.23967	1.56768e-05	0.00058275	yes	-	-	-	-
Bra006267	10	0	4.31667	0.001	-12.0757	6.4481e-05	0.00199897	yes	-	-	-	-
Bra006268	2.33333	22.1667	0.553333	5.22667	3.23967	1.58075e-05	0.000585599	yes	-	-	-	-
Bra006274	11.6667	117.667	0.846667	8.95667	3.4031	0.00220621	0.036403	yes	AT5G14930 (E=1e-133) SAG101 | SAG101 (SENESCENCE-ASSOCIATED GENE 101); carboxylesterase/ triacylglycerol lipase	-	GO:0016787//hydrolase activity;GO:0003824//catalytic activity;GO:0003674//molecular_function	GO:0008150//biological_process;GO:0044710//single-organism metabolic process;GO:0044699//single-organism process;GO:0071704//organic substance metabolic process;GO:0006629//lipid metabolic process;GO:0044238//primary metabolic process;GO:0008152//metabolic process
Bra006275	9.33333	159.333	0.29	4.98333	4.10299	4.4805e-05	0.00146741	yes	AT5G14950 (E=0.0) GMII, ATGMII | GMII (GOLGI ALPHA-MANNOSIDASE II); alpha-mannosidase	-	GO:0003674//molecular_function;GO:0016787//hydrolase activity;GO:0003824//catalytic activity;GO:0005488//binding;GO:0030246//carbohydrate binding	GO:0044238//primary metabolic process;GO:0008150//biological_process;GO:0005975//carbohydrate metabolic process;GO:0008152//metabolic process;GO:0071704//organic substance metabolic process
Bra006287	103.667	32	6.10667	1.89333	-1.68946	0.00166115	0.0291725	yes	AT5G15170 (E=0.0) | tyrosyl-DNA phosphodiesterase-related	GO:0005575//cellular_component;GO:0044424//intracellular part;GO:0043226//organelle;GO:0005623//cell;GO:0043231//intracellular membrane-bounded organelle;GO:0043227//membrane-bounded organelle;GO:0005634//nucleus;GO:0044464//cell part;GO:0043229//intracellular organelle;GO:0005622//intracellular	GO:0003824//catalytic activity;GO:0005515//protein binding;GO:0016787//hydrolase activity;GO:0005488//binding;GO:0003674//molecular_function	GO:0006259//DNA metabolic process;GO:0034641//cellular nitrogen compound metabolic process;GO:0044767//single-organism developmental process;GO:1901360//organic cyclic compound metabolic process;GO:0007275//multicellular organism development;GO:0044699//single-organism process;GO:0044237//cellular metabolic process;GO:0009791//post-embryonic development;GO:0006950//response to stress;GO:0006807//…
Bra006288	7.66667	0	2.51	0.001	-11.2935	0.000145208	0.00399126	yes	-	-	-	-
Bra006290	67.6667	21.6667	15.84	5.01	-1.66069	0.00107077	0.0206862	yes	AT5G15220 (E=5e-072) | ribosomal protein L27 family protein	GO:0044444//cytoplasmic part;GO:1990904//ribonucleoprotein complex;GO:0005575//cellular_component;GO:0005737//cytoplasm;GO:0005840//ribosome;GO:0044424//intracellular part;GO:0043229//intracellular organelle;GO:0005623//cell;GO:0043226//organelle;GO:0030529//intracellular ribonucleoprotein complex;GO:0032991//macromolecular complex;GO:0005622//intracellular;GO:0044464//cell part;GO:0043232//intra…	GO:0005198//structural molecule activity;GO:0003674//molecular_function	GO:0008152//metabolic process;GO:0008150//biological_process;GO:0043604//amide biosynthetic process;GO:0043603//cellular amide metabolic process;GO:0044271//cellular nitrogen compound biosynthetic process;GO:0044260//cellular macromolecule metabolic process;GO:0044267//cellular protein metabolic process;GO:0006412//translation;GO:0009059//macromolecule biosynthetic process;GO:0043043//peptide bio…
Bra006292	28	6.66667	5.28	1.18333	-2.15768	0.00153289	0.0273939	yes	AT5G15260 (E=1e-056) | structural constituent of ribosome	GO:0030529//intracellular ribonucleoprotein complex;GO:1990904//ribonucleoprotein complex;GO:0005737//cytoplasm;GO:0044444//cytoplasmic part;GO:0043229//intracellular organelle;GO:0005622//intracellular;GO:0005623//cell;GO:0043232//intracellular non-membrane-bounded organelle;GO:0005840//ribosome;GO:0044424//intracellular part;GO:0043228//non-membrane-bounded organelle;GO:0032991//macromolecular …	GO:0003674//molecular_function;GO:0005198//structural molecule activity	GO:0044267//cellular protein metabolic process;GO:0019538//protein metabolic process;GO:0009059//macromolecule biosynthetic process;GO:0043043//peptide biosynthetic process;GO:1901576//organic substance biosynthetic process;GO:0009987//cellular process;GO:0044249//cellular biosynthetic process;GO:0043603//cellular amide metabolic process;GO:0008150//biological_process;GO:0044271//cellular nitroge…
Bra006303	463.437	1750	36.0233	132.163	1.87532	1.27724e-06	6.11356e-05	yes	AT5G15490 (E=4e-277) | UDP-glucose 6-dehydrogenase, putative	-	GO:0003674//molecular_function;GO:1901363//heterocyclic compound binding;GO:0003824//catalytic activity;GO:0097159//organic cyclic compound binding;GO:0005488//binding;GO:1901265//nucleoside phosphate binding;GO:0036094//small molecule binding;GO:0000166//nucleotide binding	GO:0008152//metabolic process;GO:0008150//biological_process
Bra006328	91.8133	359.053	5.89333	23.17	1.9751	0.00027372	0.00679366	yes	AT5G14640 (E=5e-185) ATSK13, SK13 | SK13 (SHAGGY-LIKE KINASE 13); ATP binding / protein kinase/ protein serine/threonine kinase	-	GO:1901363//heterocyclic compound binding;GO:0003824//catalytic activity;GO:0000166//nucleotide binding;GO:0005488//binding;GO:0016301//kinase activity;GO:0036094//small molecule binding;GO:1901265//nucleoside phosphate binding;GO:0097159//organic cyclic compound binding;GO:0003674//molecular_function;GO:0016772//transferase activity, transferring phosphorus-containing groups;GO:0016740//transfer…	GO:0006464//cellular protein modification process;GO:0019538//protein metabolic process;GO:0071704//organic substance metabolic process;GO:0044267//cellular protein metabolic process;GO:0044260//cellular macromolecule metabolic process;GO:0043170//macromolecule metabolic process;GO:0043412//macromolecule modification;GO:0044238//primary metabolic process;GO:0009987//cellular process;GO:0008150//b…
Bra006340	516.297	1151	100.42	221.463	1.14102	0.00297209	0.0464903	yes	AT5G16130 (E=4e-100) | 40S ribosomal protein S7 (RPS7C)	GO:0005737//cytoplasm;GO:0044464//cell part;GO:0043228//non-membrane-bounded organelle;GO:0005622//intracellular;GO:0043232//intracellular non-membrane-bounded organelle;GO:0044444//cytoplasmic part;GO:0032991//macromolecular complex;GO:0044424//intracellular part;GO:0005575//cellular_component;GO:0043226//organelle;GO:0043229//intracellular organelle;GO:0005623//cell;GO:0030529//intracellular ri…	GO:0003674//molecular_function;GO:0005198//structural molecule activity	GO:0043603//cellular amide metabolic process;GO:0044260//cellular macromolecule metabolic process;GO:0008152//metabolic process;GO:0010467//gene expression;GO:0044237//cellular metabolic process;GO:0034641//cellular nitrogen compound metabolic process;GO:0043043//peptide biosynthetic process;GO:0008150//biological_process;GO:0034645//cellular macromolecule biosynthetic process;GO:0043170//macromo…
Bra006351	246	5.33333	49.5233	1.06667	-5.53693	2.56679e-23	8.59715e-21	yes	-	-	-	-
Bra006352	206	0.666667	24.67	0.0833333	-8.20965	6.87897e-27	2.90248e-24	yes	AT5G16390 (E=6e-088) CAC1, CAC1A, BCCP, BCCP1 | CAC1 (CHLOROPLASTIC ACETYLCOENZYME A CARBOXYLASE 1); acetyl-CoA carboxylase/ biotin binding	GO:0044464//cell part;GO:0005622//intracellular;GO:0044424//intracellular part;GO:0005575//cellular_component;GO:0005623//cell;GO:0005737//cytoplasm	GO:0003674//molecular_function;GO:0003824//catalytic activity	GO:0044238//primary metabolic process;GO:0008150//biological_process;GO:0044710//single-organism metabolic process;GO:0071704//organic substance metabolic process;GO:0044699//single-organism process;GO:0009058//biosynthetic process;GO:0009987//cellular process;GO:0006629//lipid metabolic process;GO:0008152//metabolic process
Bra006367	274.333	39	12.9167	1.79	-2.8512	6.26207e-07	3.22934e-05	yes	-	-	-	-
Bra006369	37.3333	0	3.58667	0.001	-11.8084	2.96925e-10	2.69464e-08	yes	AT5G05780 (E=3e-045) RPN8A, AE3, ATHMOV34 | RPN8A (RP NON-ATPASE SUBUNIT 8A)	-	GO:0005488//binding;GO:1901363//heterocyclic compound binding;GO:0005515//protein binding;GO:0036094//small molecule binding;GO:0003674//molecular_function;GO:0000166//nucleotide binding;GO:0097159//organic cyclic compound binding;GO:1901265//nucleoside phosphate binding	-
Bra006386	434.667	24	71.29	3.91667	-4.186	2.47605e-22	7.51817e-20	yes	-	-	-	-
Bra006387	81.23	0	13.6633	0.001	-13.738	6.59536e-18	1.46765e-15	yes	-	-	-	-
Bra006388	16.1033	0	2.74667	0.001	-11.4235	1.00081e-06	4.89689e-05	yes	-	-	-	-
Bra006389	118.333	4	13.0267	0.43	-4.92099	3.91505e-16	7.39512e-14	yes	-	-	-	-
Bra006398	149	9.66667	44.9467	2.89667	-3.95575	5.27932e-14	7.58937e-12	yes	-	-	-	-
Bra006420	26.6667	93	1.36	4.67667	1.78187	0.00295609	0.0462846	yes	AT5G17790 (E=4e-251) VAR3 | VAR3 (VARIEGATED 3); binding / zinc ion binding	-	GO:0003674//molecular_function;GO:0005488//binding	-
Bra006424	38.6667	122	8.98667	28.5533	1.6678	0.00251169	0.0404372	yes	AT5G17840 (E=2e-067) | chaperone protein dnaJ-related	-	GO:0005488//binding;GO:0005515//protein binding;GO:0003674//molecular_function	-
Bra006427	242.097	0	21.2133	0.001	-14.3727	1.91917e-28	9.30628e-26	yes	AT5G17900 (E=9e-119) | FUNCTIONS IN: molecular_function unknown; INVOLVED IN: biological_process unknown; LOCATED IN: extracellular region; CONTAINS InterPro DOMAIN/s: Micro-fibrillar-associated 1, C-terminal (InterPro:IPR009730); BEST Arabidopsis thaliana protein match is: unknown protein (TAIR:AT4G08580.1); Has 36643 Blast hits to 21191 proteins in 1090 species: Archae - 183; Bacteria - 2726; M…	GO:0005575//cellular_component;GO:0044421//extracellular region part;GO:0005576//extracellular region;GO:0031012//extracellular matrix;GO:0005578//proteinaceous extracellular matrix	-	-
Bra006522	41	6.66667	7.10667	1.19	-2.57821	0.00068592	0.0143403	yes	-	-	-	-
Bra006566	199.667	53	20.8333	5.64	-1.88513	0.00101059	0.0197195	yes	-	-	-	-
Bra006587	251	19.6667	14.9033	1.20333	-3.63053	7.44268e-06	0.00029779	yes	AT5G20940 (E=6e-226) | glycosyl hydrolase family 3 protein	-	GO:0003674//molecular_function;GO:0016787//hydrolase activity;GO:0003824//catalytic activity	GO:0005975//carbohydrate metabolic process;GO:0071704//organic substance metabolic process;GO:0044238//primary metabolic process;GO:0008152//metabolic process;GO:0008150//biological_process
Bra006598	55.3333	13.3333	8.63667	2.00667	-2.10567	0.000115245	0.00330176	yes	-	-	-	-
Bra006652	58.6667	5.66667	16.16	1.46	-3.46839	6.32263e-08	3.98093e-06	yes	-	-	-	-
Bra006664	16.99	61.61	2.29	8.23667	1.84671	0.000302989	0.00740136	yes	AT3G01280 (E=5e-137) VDAC1, ATVDAC1 | VDAC1 (VOLTAGE DEPENDENT ANION CHANNEL 1); voltage-gated anion channel	GO:0005737//cytoplasm;GO:0005622//intracellular;GO:0044444//cytoplasmic part;GO:0043231//intracellular membrane-bounded organelle;GO:0043229//intracellular organelle;GO:0016020//membrane;GO:0043226//organelle;GO:0005575//cellular_component;GO:0044424//intracellular part;GO:0005739//mitochondrion;GO:0044464//cell part;GO:0043227//membrane-bounded organelle;GO:0005623//cell	GO:0003674//molecular_function;GO:0005215//transporter activity	GO:0006810//transport;GO:0008150//biological_process;GO:0051234//establishment of localization;GO:0051179//localization;GO:0009987//cellular process
Bra006816	58	174.333	6.74	19.5067	1.53315	0.00135007	0.024781	yes	AT5G57500 (E=2e-171) | transferase, transferring glycosyl groups	GO:0005794//Golgi apparatus;GO:0012505//endomembrane system;GO:0005737//cytoplasm;GO:0044424//intracellular part;GO:0043226//organelle;GO:0044464//cell part;GO:0043229//intracellular organelle;GO:0044444//cytoplasmic part;GO:0043231//intracellular membrane-bounded organelle;GO:0005622//intracellular;GO:0005575//cellular_component;GO:0016020//membrane;GO:0043227//membrane-bounded organelle;GO:0005…	GO:0003674//molecular_function;GO:0016740//transferase activity;GO:0003824//catalytic activity	GO:0008152//metabolic process;GO:0006464//cellular protein modification process;GO:0009987//cellular process;GO:0044237//cellular metabolic process;GO:0008150//biological_process;GO:0043170//macromolecule metabolic process;GO:0044267//cellular protein metabolic process;GO:0043412//macromolecule modification;GO:0071704//organic substance metabolic process;GO:0036211//protein modification process;G…
Bra006948	3133.33	1090	271.97	93.0267	-1.54773	3.78225e-08	2.48748e-06	yes	AT3G52780 (E=3e-216) ATPAP20, PAP20 | PAP20; acid phosphatase/ protein serine/threonine phosphatase	-	GO:0003674//molecular_function;GO:0016787//hydrolase activity;GO:0005488//binding;GO:0003824//catalytic activity	-
Bra006975	158.333	333.333	6.82667	14.72	1.10852	0.00192791	0.0327936	yes	AT3G53180 (E=0.0) | catalytic/ glutamate-ammonia ligase	-	GO:0003824//catalytic activity;GO:0016787//hydrolase activity;GO:0003674//molecular_function	GO:0009058//biosynthetic process;GO:0008150//biological_process;GO:0009987//cellular process;GO:0008152//metabolic process
Bra006985	2826.18	532.827	148.817	27.74	-2.4235	7.55814e-15	1.22149e-12	yes	AT3G53260 (E=0.0) PAL2, ATPAL2 | PAL2; phenylalanine ammonia-lyase	GO:0005737//cytoplasm;GO:0005623//cell;GO:0005575//cellular_component;GO:0044424//intracellular part;GO:0044464//cell part;GO:0005622//intracellular	GO:0003824//catalytic activity;GO:0003674//molecular_function	GO:0044699//single-organism process;GO:0009987//cellular process;GO:0019748//secondary metabolic process;GO:0008150//biological_process;GO:0008152//metabolic process;GO:0009058//biosynthetic process;GO:0009056//catabolic process;GO:0044710//single-organism metabolic process
Bra006992	2	13.3333	0.186667	1.31667	2.81835	0.00291162	0.0457426	yes	AT3G53350 (E=1e-123) | myosin heavy chain-related	GO:0005634//nucleus;GO:0043232//intracellular non-membrane-bounded organelle;GO:0005575//cellular_component;GO:0043228//non-membrane-bounded organelle;GO:0005622//intracellular;GO:0043227//membrane-bounded organelle;GO:0043226//organelle;GO:0043231//intracellular membrane-bounded organelle;GO:0005623//cell;GO:0043229//intracellular organelle;GO:0044464//cell part;GO:0005856//cytoskeleton;GO:00444…	-	GO:0009987//cellular process;GO:0071840//cellular component organization or biogenesis;GO:0016043//cellular component organization;GO:0008150//biological_process
Bra007054	22	5.66667	4.28667	1.12	-1.93636	0.00208346	0.0348916	yes	-	-	-	-
Bra007070	637.333	126.333	55.8	10.8567	-2.36168	3.71214e-09	2.92019e-07	yes	AT3G54400 (E=2e-204) | aspartyl protease family protein	-	GO:0016787//hydrolase activity;GO:0003674//molecular_function;GO:0003824//catalytic activity	GO:0008152//metabolic process;GO:0071704//organic substance metabolic process;GO:0008150//biological_process;GO:0043170//macromolecule metabolic process;GO:0044238//primary metabolic process;GO:0019538//protein metabolic process
Bra007111	5.66667	0	0.85	0.001	-9.73132	0.000625059	0.0133201	yes	-	-	-	-
Bra007119	364	145.667	27.6533	10.8833	-1.34533	0.000457286	0.0102957	yes	AT3G54950 (E=2e-211) PLP7, PLA IIIA | PLA IIIA (PATATIN-LIKE PROTEIN 6)	-	GO:0016787//hydrolase activity;GO:0003824//catalytic activity;GO:0003674//molecular_function	GO:0008152//metabolic process;GO:0044238//primary metabolic process;GO:0044699//single-organism process;GO:0008150//biological_process;GO:0006629//lipid metabolic process;GO:0009056//catabolic process;GO:0071704//organic substance metabolic process;GO:0044710//single-organism metabolic process
Bra007142	843.333	17.3333	121.82	2.69667	-5.49743	2.59458e-24	9.47139e-22	yes	AT3G55120 (E=2e-107) TT5, A11, CFI | TT5 (TRANSPARENT TESTA 5); chalcone isomerase	-	GO:0003824//catalytic activity;GO:0003674//molecular_function	GO:0008150//biological_process;GO:0009058//biosynthetic process;GO:0008152//metabolic process
Bra007145	306.667	0.333333	37.4867	0.04	-9.87216	8.05569e-39	7.27004e-36	yes	AT3G55120 (E=1e-043) TT5, A11, CFI | TT5 (TRANSPARENT TESTA 5); chalcone isomerase	-	GO:0003674//molecular_function;GO:0003824//catalytic activity	GO:0008152//metabolic process;GO:0009058//biosynthetic process;GO:0008150//biological_process
Bra007232	396.333	83.3333	69.3533	14.75	-2.23325	7.1731e-07	3.64135e-05	yes	-	-	-	-
Bra007303	170	61.6667	15.2133	5.46667	-1.4766	0.000323979	0.0078375	yes	AT3G57120 (E=7e-071) | protein kinase family protein	-	GO:0016301//kinase activity;GO:1901265//nucleoside phosphate binding;GO:0097159//organic cyclic compound binding;GO:0016772//transferase activity, transferring phosphorus-containing groups;GO:0016740//transferase activity;GO:1901363//heterocyclic compound binding;GO:0005488//binding;GO:0000166//nucleotide binding;GO:0003674//molecular_function;GO:0003824//catalytic activity;GO:0036094//small mole…	GO:0071704//organic substance metabolic process;GO:0044260//cellular macromolecule metabolic process;GO:0036211//protein modification process;GO:0008152//metabolic process;GO:0044237//cellular metabolic process;GO:0009987//cellular process;GO:0043170//macromolecule metabolic process;GO:0044238//primary metabolic process;GO:0008150//biological_process;GO:0043412//macromolecule modification;GO:0044…
Bra007350	2.33333	14	0.25	1.54333	2.62605	0.00126695	0.0236564	yes	AT3G57700 (E=4e-106) | protein kinase, putative	-	GO:0000166//nucleotide binding;GO:0016772//transferase activity, transferring phosphorus-containing groups;GO:0003824//catalytic activity;GO:1901265//nucleoside phosphate binding;GO:0036094//small molecule binding;GO:0097159//organic cyclic compound binding;GO:1901363//heterocyclic compound binding;GO:0003674//molecular_function;GO:0016301//kinase activity;GO:0005488//binding;GO:0016740//transfer…	GO:0006464//cellular protein modification process;GO:0044237//cellular metabolic process;GO:0019538//protein metabolic process;GO:0071704//organic substance metabolic process;GO:0008150//biological_process;GO:0044260//cellular macromolecule metabolic process;GO:0044267//cellular protein metabolic process;GO:0008152//metabolic process;GO:0044238//primary metabolic process;GO:0036211//protein modif…
Bra007354	0.666667	821.667	0.0533333	70.8633	10.3758	2.74683e-67	9.91575e-64	yes	-	-	-	-
Bra007377	252	23.6667	22.03	2.12333	-3.37507	3.24629e-10	2.92158e-08	yes	AT3G58060 (E=2e-200) | cation efflux family protein / metal tolerance protein, putative (MTPc3)	GO:0005575//cellular_component;GO:0016020//membrane	GO:0003674//molecular_function;GO:0005215//transporter activity	GO:0009987//cellular process;GO:0006810//transport;GO:0051179//localization;GO:0008150//biological_process;GO:0051234//establishment of localization
Bra007405	77	19.3333	4.25	1.06	-2.0034	3.71148e-05	0.00124183	yes	AT3G58620 (E=1e-279) TTL4 | TTL4 (Tetratricopetide-repeat Thioredoxin-Like 4); binding	-	GO:0003674//molecular_function;GO:0005515//protein binding;GO:0005488//binding	GO:0044238//primary metabolic process;GO:0044763//single-organism cellular process;GO:0006629//lipid metabolic process;GO:0065007//biological regulation;GO:0006950//response to stress;GO:0008150//biological_process;GO:0009628//response to abiotic stimulus;GO:0019725//cellular homeostasis;GO:0009058//biosynthetic process;GO:0042592//homeostatic process;GO:0044710//single-organism metabolic process…
Bra007416	13.3333	0	1.09333	0.001	-10.0945	1.2222e-06	5.88267e-05	yes	AT3G58750 (E=2e-133) CSY2 | CSY2 (citrate synthase 2); citrate (SI)-synthase	-	GO:0016740//transferase activity;GO:0003674//molecular_function;GO:0003824//catalytic activity	GO:0008152//metabolic process;GO:0009987//cellular process;GO:0006091//generation of precursor metabolites and energy;GO:0044237//cellular metabolic process;GO:0008150//biological_process;GO:0071704//organic substance metabolic process;GO:0005975//carbohydrate metabolic process;GO:0044238//primary metabolic process
Bra007482	40	0.666667	4.31333	0.0633333	-6.08969	2.55302e-08	1.72802e-06	yes	AT3G59845 (E=2e-151) | NADP-dependent oxidoreductase, putative	-	GO:0003674//molecular_function;GO:0003824//catalytic activity;GO:0005488//binding	GO:0008152//metabolic process;GO:0008150//biological_process
Bra007503	30.6667	5.66667	2.10667	0.406667	-2.37304	0.000634567	0.0134572	yes	AT3G49130 (E=6e-014) | RNA binding	-	GO:0097159//organic cyclic compound binding;GO:0003676//nucleic acid binding;GO:0003674//molecular_function;GO:1901363//heterocyclic compound binding;GO:0005488//binding;GO:0003723//RNA binding	GO:0044237//cellular metabolic process;GO:1901360//organic cyclic compound metabolic process;GO:0008150//biological_process;GO:0008152//metabolic process;GO:0006725//cellular aromatic compound metabolic process;GO:0046483//heterocycle metabolic process;GO:0009987//cellular process;GO:0044238//primary metabolic process;GO:0071704//organic substance metabolic process;GO:0006807//nitrogen compound m…
Bra007514	140.667	54	19.05	7.28333	-1.38712	0.000503008	0.0111475	yes	-	-	-	-
Bra007526	17.3333	1.66667	2.29333	0.206667	-3.47207	0.00033765	0.00813793	yes	AT3G61090 (E=8e-029) | unknown protein	GO:0005737//cytoplasm;GO:0005623//cell;GO:0043227//membrane-bounded organelle;GO:0005622//intracellular;GO:0043229//intracellular organelle;GO:0042579//microbody;GO:0043226//organelle;GO:0044424//intracellular part;GO:0005575//cellular_component;GO:0044464//cell part;GO:0043231//intracellular membrane-bounded organelle;GO:0044444//cytoplasmic part;GO:0005777//peroxisome	-	GO:0008152//metabolic process;GO:0008150//biological_process
Bra007541	57	14.6667	15.8833	4.12333	-1.94563	0.000357081	0.00849284	yes	-	-	-	-
Bra007545	13.6667	1.66667	1.67333	0.19	-3.13865	0.00315043	0.0486244	yes	AT3G60580 (E=8e-092) | zinc finger (C2H2 type) family protein	-	GO:0005488//binding;GO:0003674//molecular_function	-
Bra007572	20.6667	75	8.82	32.2667	1.87119	0.00199589	0.0337205	yes	AT3G61110 (E=8e-037) ARS27A | ARS27A (ARABIDOPSIS RIBOSOMAL PROTEIN S27); structural constituent of ribosome	GO:0005829//cytosol;GO:0043229//intracellular organelle;GO:0030529//intracellular ribonucleoprotein complex;GO:0043232//intracellular non-membrane-bounded organelle;GO:0043228//non-membrane-bounded organelle;GO:0005622//intracellular;GO:0044444//cytoplasmic part;GO:0005575//cellular_component;GO:0044424//intracellular part;GO:0071944//cell periphery;GO:0005618//cell wall;GO:0030312//external enca…	GO:0003674//molecular_function;GO:0005198//structural molecule activity;GO:0005488//binding	GO:0006807//nitrogen compound metabolic process;GO:0009987//cellular process;GO:0046483//heterocycle metabolic process;GO:0009059//macromolecule biosynthetic process;GO:1901360//organic cyclic compound metabolic process;GO:1901564//organonitrogen compound metabolic process;GO:0071704//organic substance metabolic process;GO:0044260//cellular macromolecule metabolic process;GO:0043043//peptide bios…
Bra007581	60	0.666667	11.6967	0.136667	-6.41929	2.83993e-14	4.23241e-12	yes	AT3G61190 (E=2e-047) BAP1 | BAP1 (BON ASSOCIATION PROTEIN 1); phospholipid binding / protein binding	-	GO:0003674//molecular_function;GO:0005515//protein binding;GO:0005488//binding	-
Bra007589	46.6667	9.33333	8.65667	1.69333	-2.35395	0.000231472	0.00594961	yes	AT3G61260 (E=2e-057) | DNA-binding family protein / remorin family protein	GO:0005886//plasma membrane;GO:0043231//intracellular membrane-bounded organelle;GO:0043227//membrane-bounded organelle;GO:0071944//cell periphery;GO:0044444//cytoplasmic part;GO:0044464//cell part;GO:0005737//cytoplasm;GO:0005622//intracellular;GO:0016020//membrane;GO:0043226//organelle;GO:0005773//vacuole;GO:0005623//cell;GO:0043229//intracellular organelle;GO:0005575//cellular_component;GO:004…	-	-
Bra007611	100.667	25.3333	8.01	1.88667	-2.08596	0.000189581	0.00503622	yes	AT3G61510 (E=8e-218) ACS1, AT-ACS1 | ACS1 (ACC SYNTHASE 1); 1-aminocyclopropane-1-carboxylate synthase	-	GO:0003674//molecular_function;GO:0003824//catalytic activity;GO:0005488//binding	GO:0008150//biological_process;GO:0008152//metabolic process;GO:0009058//biosynthetic process
Bra007618	65.6667	10	4.4	0.67	-2.71527	1.2777e-06	6.11356e-05	yes	AT3G61600 (E=7e-221) ATPOB1 | ATPOB1; protein binding	-	GO:0005488//binding;GO:0003674//molecular_function;GO:0005515//protein binding	-
Bra007630	21.6667	63.6667	2.17333	6.55333	1.59232	0.00176392	0.0305642	yes	AT3G61750 (E=8e-108) | auxin-responsive protein -related	GO:0016020//membrane;GO:0005575//cellular_component	-	-
Bra007634	67.6667	157.667	9.13	20.9967	1.20147	0.0027188	0.0432945	yes	AT3G61870 (E=3e-087) | unknown protein	GO:0043229//intracellular organelle;GO:0016020//membrane;GO:0044444//cytoplasmic part;GO:0009536//plastid;GO:0044464//cell part;GO:0043227//membrane-bounded organelle;GO:0009579//thylakoid;GO:0005737//cytoplasm;GO:0005622//intracellular;GO:0043226//organelle;GO:0044424//intracellular part;GO:0043231//intracellular membrane-bounded organelle;GO:0005623//cell;GO:0005575//cellular_component	-	GO:0044237//cellular metabolic process;GO:0006807//nitrogen compound metabolic process;GO:0006629//lipid metabolic process;GO:0006139//nucleobase-containing compound metabolic process;GO:0015979//photosynthesis;GO:0009058//biosynthetic process;GO:1901360//organic cyclic compound metabolic process;GO:0006091//generation of precursor metabolites and energy;GO:0044699//single-organism process;GO:004…
Bra007648	0	14	0.001	1.78333	10.8004	5.10771e-07	2.68085e-05	yes	-	-	-	-
Bra007652	241.333	880.667	41.3633	149.34	1.85218	1.36031e-07	8.03548e-06	yes	AT3G62020 (E=6e-117) GLP10 | GLP10 (GERMIN-LIKE PROTEIN 10); manganese ion binding / nutrient reservoir	GO:0005623//cell;GO:0044464//cell part;GO:0005618//cell wall;GO:0071944//cell periphery;GO:0030312//external encapsulating structure;GO:0005576//extracellular region;GO:0005575//cellular_component	GO:0003674//molecular_function;GO:0005488//binding	GO:0071704//organic substance metabolic process;GO:0008150//biological_process;GO:0044238//primary metabolic process;GO:0009987//cellular process;GO:0008152//metabolic process;GO:0009058//biosynthetic process;GO:0005975//carbohydrate metabolic process
Bra007656	3	63.6667	0.49	10.4367	4.41274	1.03673e-11	1.16953e-09	yes	AT3G62040 (E=3e-110) | catalytic/ hydrolase	-	GO:0003674//molecular_function;GO:0003824//catalytic activity;GO:0016787//hydrolase activity	GO:0051234//establishment of localization;GO:0006810//transport;GO:0051179//localization;GO:0008150//biological_process;GO:0008152//metabolic process
Bra007657	34.6667	103	3.03667	9.2	1.59915	0.00280526	0.0443936	yes	AT3G62060 (E=1e-200) | pectinacetylesterase family protein	-	GO:0016787//hydrolase activity;GO:0003674//molecular_function;GO:0003824//catalytic activity	-
Bra007668	258.333	514.333	14.6367	29.32	1.0023	0.00105968	0.0205295	yes	AT3G62200 (E=5e-128) | FUNCTIONS IN: molecular_function unknown; INVOLVED IN: biological_process unknown; LOCATED IN: cellular_component unknown; CONTAINS InterPro DOMAIN/s: Protein of unknown function DUF537 (InterPro:IPR007491); BEST Arabidopsis thaliana protein match is: EDA32 (embryo sac development arrest 32) (TAIR:AT3G62210.1); Has 3380 Blast hits to 2820 proteins in 272 species: Archae - 0…	GO:0043231//intracellular membrane-bounded organelle;GO:0043229//intracellular organelle;GO:0042579//microbody;GO:0043227//membrane-bounded organelle;GO:0005622//intracellular;GO:0005737//cytoplasm;GO:0043226//organelle;GO:0044444//cytoplasmic part;GO:0005777//peroxisome;GO:0005623//cell;GO:0005575//cellular_component;GO:0044464//cell part;GO:0044424//intracellular part	-	GO:0008152//metabolic process;GO:0008150//biological_process
Bra007729	6.66667	54.6667	1.10333	8.85	3.00381	4.27512e-07	2.28821e-05	yes	AT3G63120 (E=1e-089) CYCP1;1 | CYCP1;1 (cyclin p1;1); cyclin-dependent protein kinase	-	GO:0005488//binding;GO:0003674//molecular_function;GO:0005515//protein binding	GO:0009987//cellular process;GO:0009791//post-embryonic development;GO:0008152//metabolic process;GO:0007275//multicellular organism development;GO:0044238//primary metabolic process;GO:0036211//protein modification process;GO:0043170//macromolecule metabolic process;GO:0043412//macromolecule modification;GO:0044237//cellular metabolic process;GO:0071704//organic substance metabolic process;GO:00…
Bra007732	150	7.33333	19.4567	0.963333	-4.33609	4.66578e-16	8.71187e-14	yes	AT3G63170 (E=4e-106) | chalcone isomerase	-	GO:0003674//molecular_function;GO:0003824//catalytic activity	-
Bra007736	13.3333	1.33333	2.07667	0.216667	-3.26072	0.000760115	0.0156012	yes	AT3G63210 (E=2e-078) MARD1 | MARD1	-	-	GO:0007275//multicellular organism development;GO:0032501//multicellular organismal process;GO:0044767//single-organism developmental process;GO:0044707//single-multicellular organism process;GO:0032502//developmental process;GO:0000003//reproduction;GO:0009719//response to endogenous stimulus;GO:0050896//response to stimulus;GO:0009791//post-embryonic development;GO:0008150//biological_process;G…
Bra007739	7.33333	0	0.93	0.001	-9.86109	0.000122939	0.00347268	yes	AT3G63350 (E=2e-046) AT-HSFA7B, HSFA7B | AT-HSFA7B; DNA binding / transcription factor	GO:0005575//cellular_component;GO:0005622//intracellular;GO:0044464//cell part;GO:0043226//organelle;GO:0005634//nucleus;GO:0043227//membrane-bounded organelle;GO:0043231//intracellular membrane-bounded organelle;GO:0005623//cell;GO:0044424//intracellular part;GO:0043229//intracellular organelle	GO:0003674//molecular_function;GO:0001071//nucleic acid binding transcription factor activity;GO:1901363//heterocyclic compound binding;GO:0003676//nucleic acid binding;GO:0097159//organic cyclic compound binding;GO:0003677//DNA binding;GO:0005488//binding;GO:0003700//transcription factor activity, sequence-specific DNA binding	GO:0000003//reproduction;GO:0044707//single-multicellular organism process;GO:0006807//nitrogen compound metabolic process;GO:0044710//single-organism metabolic process;GO:0044699//single-organism process;GO:0048608//reproductive structure development;GO:0008152//metabolic process;GO:0009628//response to abiotic stimulus;GO:0006950//response to stress;GO:0032502//developmental process;GO:0006725/…
Bra007780	107.333	17	12.7533	2.05667	-2.63249	0.000255692	0.00640987	yes	-	-	-	-
Bra007801	67	7.66667	5.08	0.586667	-3.11422	2.36259e-08	1.61596e-06	yes	AT2G25360 (E=1e-097) | zinc finger protein-related	-	GO:0005488//binding;GO:0003824//catalytic activity;GO:0016740//transferase activity;GO:0005515//protein binding;GO:0003674//molecular_function	GO:0071704//organic substance metabolic process;GO:0009987//cellular process;GO:0043170//macromolecule metabolic process;GO:0008152//metabolic process;GO:0036211//protein modification process;GO:0044237//cellular metabolic process;GO:0044267//cellular protein metabolic process;GO:0044238//primary metabolic process;GO:0019538//protein metabolic process;GO:0044260//cellular macromolecule metabolic …
Bra007821	507.333	9.33333	105.363	1.88	-5.8085	1.26026e-35	9.7487e-33	yes	AT2G25060 (E=2e-076) | plastocyanin-like domain-containing protein	GO:0005623//cell;GO:0005886//plasma membrane;GO:0005575//cellular_component;GO:0071944//cell periphery;GO:0044464//cell part;GO:0016020//membrane	GO:0005488//binding;GO:0003674//molecular_function	GO:0044763//single-organism cellular process;GO:0008150//biological_process;GO:0044267//cellular protein metabolic process;GO:0044699//single-organism process;GO:0007049//cell cycle;GO:0071704//organic substance metabolic process;GO:0006464//cellular protein modification process;GO:0019538//protein metabolic process;GO:0044260//cellular macromolecule metabolic process;GO:0009987//cellular process…
Bra007840	211.667	80	9.25333	3.38333	-1.45153	0.000783573	0.0159608	yes	AT2G24650 (E=5e-086) | DNA binding / transcription factor	GO:0043229//intracellular organelle;GO:0043231//intracellular membrane-bounded organelle;GO:0005623//cell;GO:0043227//membrane-bounded organelle;GO:0005575//cellular_component;GO:0043226//organelle;GO:0044424//intracellular part;GO:0005634//nucleus;GO:0005622//intracellular;GO:0044464//cell part	GO:1901363//heterocyclic compound binding;GO:0097159//organic cyclic compound binding;GO:0000166//nucleotide binding;GO:0003677//DNA binding;GO:0003676//nucleic acid binding;GO:0003674//molecular_function;GO:0036094//small molecule binding;GO:0005488//binding;GO:1901265//nucleoside phosphate binding	GO:0034641//cellular nitrogen compound metabolic process;GO:0006139//nucleobase-containing compound metabolic process;GO:0006807//nitrogen compound metabolic process;GO:0044237//cellular metabolic process;GO:0008152//metabolic process;GO:0046483//heterocycle metabolic process;GO:0009987//cellular process;GO:0044238//primary metabolic process;GO:0071704//organic substance metabolic process;GO:1901…
Bra007850	5.66667	0	1.13333	0.001	-10.1464	0.00243484	0.0393951	yes	-	-	-	-
Bra007856	327.667	141.333	26.52	11.4733	-1.2088	0.000361352	0.00857557	yes	-	-	-	-
Bra008006	144.333	45.6667	11.5367	3.70667	-1.63803	0.000104266	0.00302454	yes	AT1G72100 (E=5e-102) | late embryogenesis abundant domain-containing protein / LEA domain-containing protein	GO:0005623//cell;GO:0005622//intracellular;GO:0005575//cellular_component;GO:0005737//cytoplasm;GO:0044424//intracellular part;GO:0044464//cell part	-	GO:0044767//single-organism developmental process;GO:0007275//multicellular organism development;GO:0044699//single-organism process;GO:0000003//reproduction;GO:0008150//biological_process;GO:0044707//single-multicellular organism process;GO:0032501//multicellular organismal process;GO:0009791//post-embryonic development;GO:0032502//developmental process
Bra008038	24	3	2.03333	0.266667	-2.93074	0.000632179	0.0134329	yes	AT1G72540 (E=3e-186) | protein kinase, putative	-	GO:0097159//organic cyclic compound binding;GO:1901363//heterocyclic compound binding;GO:0016740//transferase activity;GO:0016772//transferase activity, transferring phosphorus-containing groups;GO:0005488//binding;GO:0003674//molecular_function;GO:1901265//nucleoside phosphate binding;GO:0003824//catalytic activity;GO:0000166//nucleotide binding;GO:0016301//kinase activity;GO:0036094//small mole…	GO:0008150//biological_process;GO:0036211//protein modification process;GO:0043170//macromolecule metabolic process;GO:0044237//cellular metabolic process;GO:0006464//cellular protein modification process;GO:0019538//protein metabolic process;GO:0044260//cellular macromolecule metabolic process;GO:0043412//macromolecule modification;GO:0008152//metabolic process;GO:0044238//primary metabolic proc…
Bra008087	61.6667	211.667	4.22667	14.08	1.73606	0.00051837	0.0114333	yes	AT1G73220 (E=1e-256) AtOCT1 | AtOCT1 (Arabidopsis thaliana ORGANIC CATION/CARNITINE TRANSPORTER1); carbohydrate transmembrane transporter/ carnitine transporter/ transporter	GO:0016020//membrane;GO:0005575//cellular_component	GO:0003674//molecular_function;GO:0005215//transporter activity	GO:0006810//transport;GO:0008150//biological_process;GO:0051179//localization;GO:0009987//cellular process;GO:0051234//establishment of localization
Bra008127	854.667	305.333	97.3967	34.9233	-1.47968	6.21793e-06	0.000253787	yes	AT1G74020 (E=3e-167) SS2 | SS2 (STRICTOSIDINE SYNTHASE 2); strictosidine synthase	-	GO:0003824//catalytic activity;GO:0003674//molecular_function	GO:0008150//biological_process;GO:0008152//metabolic process;GO:0009058//biosynthetic process
Bra008139	0	5	0.001	0.233333	7.86625	0.00114257	0.0218102	yes	AT1G74360 (E=3e-312) | leucine-rich repeat transmembrane protein kinase, putative	-	GO:0005515//protein binding;GO:0005488//binding;GO:0003674//molecular_function	-
Bra008185	8	42.3333	0.996667	5.13	2.36378	0.000632902	0.0134394	yes	AT1G75240 (E=2e-092) AtHB33 | AtHB33 (ARABIDOPSIS THALIANA HOMEOBOX PROTEIN 33); DNA binding / transcription factor	-	GO:0003674//molecular_function;GO:0003677//DNA binding;GO:0005488//binding;GO:1901363//heterocyclic compound binding;GO:0097159//organic cyclic compound binding;GO:0003676//nucleic acid binding	-
Bra008227	97.3333	37.3333	18.1567	6.91	-1.39374	0.00186303	0.0319746	yes	AT1G75840 (E=2e-104) ARAC5, ATGP3, ROP4, ATROP4 | ARAC5 (RAC-LIKE GTP BINDING PROTEIN 5); GTP binding / GTPase	GO:0005623//cell;GO:0005575//cellular_component;GO:0005622//intracellular;GO:0016020//membrane;GO:0044464//cell part	GO:1901265//nucleoside phosphate binding;GO:0000166//nucleotide binding;GO:1901363//heterocyclic compound binding;GO:0005488//binding;GO:0003674//molecular_function;GO:0097159//organic cyclic compound binding;GO:0036094//small molecule binding	GO:0051716//cellular response to stimulus;GO:0044763//single-organism cellular process;GO:0050896//response to stimulus;GO:0044699//single-organism process;GO:0007154//cell communication;GO:0009987//cellular process;GO:0050794//regulation of cellular process;GO:0023052//signaling;GO:0044700//single organism signaling;GO:0007165//signal transduction;GO:0050789//regulation of biological process;GO:…
Bra008299	61	319.667	3.13	17.05	2.44554	4.04203e-07	2.18142e-05	yes	AT1G77280 (E=2e-193) | protein kinase family protein	-	GO:0000166//nucleotide binding;GO:1901363//heterocyclic compound binding;GO:0016301//kinase activity;GO:0036094//small molecule binding;GO:0005488//binding;GO:0016772//transferase activity, transferring phosphorus-containing groups;GO:0016740//transferase activity;GO:1901265//nucleoside phosphate binding;GO:0097159//organic cyclic compound binding;GO:0003674//molecular_function;GO:0003824//cataly…	GO:0008150//biological_process;GO:0044237//cellular metabolic process;GO:0044267//cellular protein metabolic process;GO:0009987//cellular process;GO:0044238//primary metabolic process;GO:0044260//cellular macromolecule metabolic process;GO:0006950//response to stress;GO:0071704//organic substance metabolic process;GO:0050896//response to stimulus;GO:0043412//macromolecule modification;GO:0008152/…
Bra008367	0.683333	11.5533	0.0766667	1.32	4.10579	9.61423e-05	0.00283445	yes	-	-	-	-
Bra008382	11.3333	0.666667	2.25	0.13	-4.11334	0.000163371	0.00442682	yes	-	-	-	-
Bra008387	11	52.3333	0.513333	2.47	2.26654	0.000764604	0.0156628	yes	AT1G78940 (E=3e-274) | protein kinase family protein	-	GO:0003824//catalytic activity;GO:0016740//transferase activity;GO:1901265//nucleoside phosphate binding;GO:0016772//transferase activity, transferring phosphorus-containing groups;GO:0003674//molecular_function;GO:0097159//organic cyclic compound binding;GO:0000166//nucleotide binding;GO:0005488//binding;GO:0036094//small molecule binding;GO:0016301//kinase activity;GO:1901363//heterocyclic comp…	GO:0008150//biological_process;GO:0043412//macromolecule modification;GO:0044238//primary metabolic process;GO:0036211//protein modification process;GO:0006464//cellular protein modification process;GO:0044237//cellular metabolic process;GO:0006950//response to stress;GO:0009987//cellular process;GO:0044260//cellular macromolecule metabolic process;GO:0071704//organic substance metabolic process;…
Bra008472	20	3	1.64	0.266667	-2.62059	0.000903272	0.018015	yes	AT1G80460 (E=4e-218) NHO1, GLI1 | NHO1 (nonhost resistance to P. s. phaseolicola 1); carbohydrate kinase/ glycerol kinase	-	GO:0003674//molecular_function;GO:0016772//transferase activity, transferring phosphorus-containing groups;GO:0016740//transferase activity;GO:0016301//kinase activity;GO:0003824//catalytic activity	GO:0071704//organic substance metabolic process;GO:0044238//primary metabolic process;GO:0008150//biological_process;GO:0009987//cellular process;GO:0008152//metabolic process;GO:0005975//carbohydrate metabolic process
Bra008570	2543.67	127.333	446.523	23.0167	-4.27798	8.23495e-23	2.67545e-20	yes	AT5G17220 (E=4e-094) ATGSTF12, GST26, TT19 | ATGSTF12 (ARABIDOPSIS THALIANA GLUTATHIONE S-TRANSFERASE PHI 12); glutathione transferase	-	GO:0003674//molecular_function;GO:0005515//protein binding;GO:0005488//binding	-
Bra008579	31	5	5.86333	0.923333	-2.6668	0.000136592	0.00379294	yes	AT5G17060 (E=1e-107) ATARFB1B | ATARFB1B; GTP binding	GO:0005575//cellular_component;GO:0044464//cell part;GO:0005622//intracellular;GO:0005623//cell	GO:0005488//binding;GO:1901363//heterocyclic compound binding;GO:1901265//nucleoside phosphate binding;GO:0097159//organic cyclic compound binding;GO:0036094//small molecule binding;GO:0003674//molecular_function;GO:0000166//nucleotide binding	GO:0044238//primary metabolic process;GO:0043412//macromolecule modification;GO:0050896//response to stimulus;GO:0009987//cellular process;GO:0044260//cellular macromolecule metabolic process;GO:0051716//cellular response to stimulus;GO:0044237//cellular metabolic process;GO:0065007//biological regulation;GO:0044267//cellular protein metabolic process;GO:0050794//regulation of cellular process;GO…
Bra008590	9.08333	0	3.42	0.001	-11.7398	7.21382e-05	0.00219242	yes	-	-	-	-
Bra008644	12.3333	0.666667	1.39333	0.07	-4.31504	7.38993e-05	0.00224175	yes	-	-	-	-
Bra008671	18.6667	0	2.43333	0.001	-11.2487	6.79187e-08	4.25166e-06	yes	AT5G15820 (E=6e-028) | zinc finger (C3HC4-type RING finger) family protein	-	GO:0005515//protein binding;GO:0003674//molecular_function;GO:0005488//binding	-
Bra008694	211.333	467.333	30.5767	65.8467	1.10668	0.000627563	0.013361	yes	AT5G15530 (E=1e-070) BCCP2, CAC1-B | BCCP2 (BIOTIN CARBOXYL CARRIER PROTEIN 2); biotin binding	GO:0005575//cellular_component;GO:0005737//cytoplasm;GO:0044424//intracellular part;GO:0005623//cell;GO:0044464//cell part;GO:0005622//intracellular	GO:0003824//catalytic activity;GO:0003674//molecular_function	GO:0008150//biological_process;GO:0009987//cellular process;GO:0071704//organic substance metabolic process;GO:0009058//biosynthetic process;GO:0044699//single-organism process;GO:0006629//lipid metabolic process;GO:0008152//metabolic process;GO:0044710//single-organism metabolic process;GO:0044238//primary metabolic process
Bra008697	11	0	2.27333	0.001	-11.1506	3.26925e-06	0.000140682	yes	-	-	-	-
Bra008698	1826	913	70.6833	34.1967	-1.04751	0.000906313	0.0180535	yes	AT5G15450 (E=0.0) APG6, CLPB3, CLPB-P | CLPB3 (CASEIN LYTIC PROTEINASE B3); ATP binding / ATPase/ nucleoside-triphosphatase/ nucleotide binding / protein binding	GO:0005622//intracellular;GO:0005575//cellular_component;GO:0005623//cell;GO:0044424//intracellular part;GO:0005737//cytoplasm;GO:0044464//cell part	GO:0003824//catalytic activity;GO:0000166//nucleotide binding;GO:0016787//hydrolase activity;GO:0036094//small molecule binding;GO:0097159//organic cyclic compound binding;GO:1901363//heterocyclic compound binding;GO:0005488//binding;GO:1901265//nucleoside phosphate binding;GO:0003674//molecular_function	GO:0043170//macromolecule metabolic process;GO:0044238//primary metabolic process;GO:0008152//metabolic process;GO:0050896//response to stimulus;GO:0019538//protein metabolic process;GO:0008150//biological_process;GO:0071704//organic substance metabolic process;GO:0009628//response to abiotic stimulus;GO:0006950//response to stress
Bra008726	113.667	259.333	2.64667	5.93	1.16386	0.00175753	0.030486	yes	AT5G15070 (E=0.0) | acid phosphatase/ oxidoreductase/ transition metal ion binding	-	GO:0097159//organic cyclic compound binding;GO:0036094//small molecule binding;GO:0005488//binding;GO:1901363//heterocyclic compound binding;GO:0003824//catalytic activity;GO:0016301//kinase activity;GO:0000166//nucleotide binding;GO:0016772//transferase activity, transferring phosphorus-containing groups;GO:0016787//hydrolase activity;GO:0003674//molecular_function;GO:0016740//transferase activi…	GO:0008150//biological_process;GO:0006464//cellular protein modification process;GO:0044267//cellular protein metabolic process;GO:0043170//macromolecule metabolic process;GO:0043412//macromolecule modification;GO:0036211//protein modification process;GO:0008152//metabolic process;GO:0009987//cellular process;GO:0071704//organic substance metabolic process;GO:0019538//protein metabolic process;GO…
Bra008734	40	10.3333	2.98333	0.78	-1.93538	0.00292984	0.0459622	yes	AT5G14860 (E=2e-235) | transferase, transferring glycosyl groups	-	GO:0016740//transferase activity;GO:0003824//catalytic activity;GO:0003674//molecular_function	GO:0008152//metabolic process;GO:0008150//biological_process
Bra008743	373.667	106	37.1733	10.53	-1.81976	3.19097e-05	0.00109128	yes	AT5G14700 (E=2e-173) | cinnamoyl-CoA reductase-related	-	GO:0003674//molecular_function;GO:0005488//binding;GO:0003824//catalytic activity	GO:0008150//biological_process;GO:0008152//metabolic process;GO:0009987//cellular process
Bra008761	60	169	5.90333	16.87	1.51486	0.000302482	0.00739453	yes	-	-	-	-
Bra008789	25	1	1.36	0.05	-4.76553	1.17606e-07	7.03667e-06	yes	AT5G13990 (E=8e-293) ATEXO70C2 | ATEXO70C2 (exocyst subunit EXO70 family protein C2); protein binding	GO:0005575//cellular_component;GO:0044424//intracellular part;GO:0005623//cell;GO:0005622//intracellular;GO:0005737//cytoplasm;GO:0044464//cell part	-	GO:0051234//establishment of localization;GO:0008150//biological_process;GO:0006810//transport;GO:0051179//localization;GO:0009987//cellular process
Bra008792	26598.4	115	2509.08	11.11	-7.81916	1.62463e-64	5.27827e-61	yes	AT5G13930 (E=4e-219) CHS, TT4, ATCHS | TT4 (TRANSPARENT TESTA 4); naringenin-chalcone synthase	-	GO:0003824//catalytic activity;GO:0003674//molecular_function;GO:0016740//transferase activity	GO:0008150//biological_process;GO:0009058//biosynthetic process;GO:0008152//metabolic process
Bra008817	90.3333	4	4.65667	0.206667	-4.49392	1.09479e-12	1.40587e-10	yes	AT5G13580 (E=0.0) | ABC transporter family protein	GO:0016020//membrane;GO:0005575//cellular_component	GO:1901265//nucleoside phosphate binding;GO:0005488//binding;GO:0097159//organic cyclic compound binding;GO:0036094//small molecule binding;GO:0000166//nucleotide binding;GO:1901363//heterocyclic compound binding;GO:0003824//catalytic activity;GO:0003674//molecular_function;GO:0016787//hydrolase activity	GO:0044710//single-organism metabolic process;GO:0008150//biological_process;GO:0009987//cellular process;GO:0008152//metabolic process;GO:0019748//secondary metabolic process;GO:0044699//single-organism process;GO:0009058//biosynthetic process
Bra008850	20.3333	118	3.59667	20.4167	2.50501	6.41232e-07	3.29115e-05	yes	AT5G13170 (E=4e-086) SAG29 | SAG29 (SENESCENCE-ASSOCIATED PROTEIN 29)	GO:0071944//cell periphery;GO:0005886//plasma membrane;GO:0005623//cell;GO:0044464//cell part;GO:0005575//cellular_component;GO:0016020//membrane	-	GO:0051234//establishment of localization;GO:0008150//biological_process;GO:0006810//transport;GO:0051179//localization
Bra008852	10	0	0.596667	0.001	-9.22078	0.000122184	0.00345487	yes	AT5G13150 (E=3e-230) ATEXO70C1 | ATEXO70C1 (exocyst subunit EXO70 family protein C1); protein binding	GO:0005622//intracellular;GO:0005737//cytoplasm;GO:0044464//cell part;GO:0044424//intracellular part;GO:0005623//cell;GO:0005575//cellular_component	-	GO:0009987//cellular process;GO:0008150//biological_process;GO:0051234//establishment of localization;GO:0051179//localization;GO:0006810//transport
Bra008881	98	559.667	7.15667	40.3233	2.49426	1.39434e-06	6.60359e-05	yes	-	-	-	-
Bra008882	15.3333	69.6667	1.15	5.51667	2.26216	0.000739469	0.0152634	yes	-	-	-	-
Bra008900	829.333	181.333	118.703	25.5867	-2.2139	1.93943e-11	2.11444e-09	yes	AT5G12310 (E=1e-074) | zinc finger (C3HC4-type RING finger) family protein	-	GO:0005515//protein binding;GO:0003674//molecular_function;GO:0005488//binding	-
Bra008907	55.3333	225.667	6.55333	26.5433	2.01805	3.41984e-07	1.87364e-05	yes	AT5G12210 (E=2e-167) | geranylgeranyl transferase type II beta subunit, putative / RAB geranylgeranyltransferase beta subunit, putative	GO:0005622//intracellular;GO:0005575//cellular_component;GO:0044444//cytoplasmic part;GO:0044464//cell part;GO:0005737//cytoplasm;GO:0044424//intracellular part;GO:0005829//cytosol;GO:0005623//cell	GO:0003824//catalytic activity;GO:0003674//molecular_function;GO:0016740//transferase activity	GO:0008152//metabolic process;GO:0044238//primary metabolic process;GO:0071704//organic substance metabolic process;GO:0043170//macromolecule metabolic process;GO:0009987//cellular process;GO:0044267//cellular protein metabolic process;GO:0043412//macromolecule modification;GO:0019538//protein metabolic process;GO:0036211//protein modification process;GO:0044237//cellular metabolic process;GO:000…
Bra008915	12.6667	91	2.05	14.4	2.81237	1.09455e-07	6.59757e-06	yes	AT5G12110 (E=2e-085) | elongation factor 1B alpha-subunit 1 (eEF1Balpha1)	GO:0005737//cytoplasm;GO:0005623//cell;GO:0044424//intracellular part;GO:0044464//cell part;GO:0005622//intracellular;GO:0005575//cellular_component	GO:0008135//translation factor activity, RNA binding;GO:0005488//binding;GO:1901363//heterocyclic compound binding;GO:0003676//nucleic acid binding;GO:0003723//RNA binding;GO:0097159//organic cyclic compound binding;GO:0003674//molecular_function	GO:0034645//cellular macromolecule biosynthetic process;GO:1901566//organonitrogen compound biosynthetic process;GO:0006518//peptide metabolic process;GO:0019538//protein metabolic process;GO:0043043//peptide biosynthetic process;GO:0044238//primary metabolic process;GO:0034641//cellular nitrogen compound metabolic process;GO:0009987//cellular process;GO:0044237//cellular metabolic process;GO:000…
Bra008920	110.333	329.667	27.29	76.6267	1.48947	0.0029033	0.0457426	yes	AT5G12020 (E=1e-064) HSP17.6II | HSP17.6II (17.6 KDA CLASS II HEAT SHOCK PROTEIN)	GO:0005575//cellular_component;GO:0044444//cytoplasmic part;GO:0005623//cell;GO:0005737//cytoplasm;GO:0005622//intracellular;GO:0044464//cell part;GO:0044424//intracellular part;GO:0005829//cytosol	GO:0003674//molecular_function;GO:0005515//protein binding;GO:0005488//binding	GO:0009987//cellular process;GO:0009628//response to abiotic stimulus;GO:0008150//biological_process;GO:0006950//response to stress;GO:0050896//response to stimulus
Bra008928	364.667	34.3333	67.61	6.44667	-3.39061	1.17055e-16	2.34754e-14	yes	AT5G11900 (E=3e-097) | eukaryotic translation initiation factor SUI1 family protein	GO:0005840//ribosome;GO:0043229//intracellular organelle;GO:0005622//intracellular;GO:0030529//intracellular ribonucleoprotein complex;GO:0044424//intracellular part;GO:0005623//cell;GO:0043228//non-membrane-bounded organelle;GO:1990904//ribonucleoprotein complex;GO:0005575//cellular_component;GO:0032991//macromolecular complex;GO:0044444//cytoplasmic part;GO:0005737//cytoplasm;GO:0043232//intrac…	GO:0005488//binding;GO:0003674//molecular_function;GO:0003676//nucleic acid binding;GO:0008135//translation factor activity, RNA binding;GO:0003723//RNA binding;GO:1901363//heterocyclic compound binding;GO:0097159//organic cyclic compound binding	GO:0071704//organic substance metabolic process;GO:0008150//biological_process;GO:0008152//metabolic process;GO:1901576//organic substance biosynthetic process;GO:1901564//organonitrogen compound metabolic process;GO:0043043//peptide biosynthetic process;GO:0034641//cellular nitrogen compound metabolic process;GO:0006807//nitrogen compound metabolic process;GO:0009987//cellular process;GO:0019538…
Bra008939	14.7467	94.6667	2.42	15.3033	2.66077	6.95932e-06	0.000280523	yes	AT4G11630 (E=3e-078) | ribosomal protein L19 family protein	GO:0043228//non-membrane-bounded organelle;GO:0005575//cellular_component;GO:0043226//organelle;GO:0005623//cell;GO:0032991//macromolecular complex;GO:0043232//intracellular non-membrane-bounded organelle;GO:0005840//ribosome;GO:0005737//cytoplasm;GO:0030529//intracellular ribonucleoprotein complex;GO:1990904//ribonucleoprotein complex;GO:0043229//intracellular organelle;GO:0044444//cytoplasmic p…	GO:0005198//structural molecule activity;GO:0003674//molecular_function	GO:0034645//cellular macromolecule biosynthetic process;GO:0006807//nitrogen compound metabolic process;GO:0043604//amide biosynthetic process;GO:1901576//organic substance biosynthetic process;GO:0006518//peptide metabolic process;GO:0044267//cellular protein metabolic process;GO:0044238//primary metabolic process;GO:1901564//organonitrogen compound metabolic process;GO:0009058//biosynthetic pro…
Bra008940	21.6667	77.3333	12.34	43.1333	1.80546	0.000250104	0.00629405	yes	-	-	-	-
Bra008942	13	0.333333	1.62	0.04	-5.33985	3.69627e-05	0.00123924	yes	AT5G11710 (E=5e-034) | epsin N-terminal homology (ENTH) domain-containing protein / clathrin assembly protein-related	GO:0044424//intracellular part;GO:0044464//cell part;GO:0043232//intracellular non-membrane-bounded organelle;GO:0043226//organelle;GO:0005794//Golgi apparatus;GO:0043227//membrane-bounded organelle;GO:0005856//cytoskeleton;GO:0005737//cytoplasm;GO:0005622//intracellular;GO:0005575//cellular_component;GO:0043229//intracellular organelle;GO:0044444//cytoplasmic part;GO:0005623//cell;GO:0009579//th…	GO:0005488//binding;GO:0003674//molecular_function;GO:0005515//protein binding	GO:0051234//establishment of localization;GO:0051179//localization;GO:0008150//biological_process;GO:0006810//transport
Bra008944	312	42.3333	35.8567	5.03	-2.83361	5.1071e-08	3.27914e-06	yes	-	-	-	-
Bra008948	83.6667	6.66667	12.0633	0.963333	-3.64645	3.51687e-10	3.14764e-08	yes	-	-	-	-
Bra008977	7.33333	0	1.61333	0.001	-10.6558	0.000180564	0.00483224	yes	AT5G11250 (E=7e-042) | disease resistance protein (TIR-NBS-LRR class), putative	-	GO:1901363//heterocyclic compound binding;GO:0000166//nucleotide binding;GO:0003674//molecular_function;GO:0036094//small molecule binding;GO:0097159//organic cyclic compound binding;GO:0005488//binding;GO:1901265//nucleoside phosphate binding	-
Bra008979	61.3333	214	3.63333	12.6833	1.80357	4.98706e-06	0.000207458	yes	AT5G11240 (E=8e-298) | transducin family protein / WD-40 repeat family protein	-	GO:0003674//molecular_function;GO:0005515//protein binding;GO:0005488//binding	-
Bra008982	330.227	66.5467	44.2967	8.94333	-2.30831	6.66117e-06	0.000270181	yes	-	-	-	-
Bra008993	143.667	57	36.19	13.8067	-1.39023	0.003194	0.049087	yes	-	-	-	-
Bra009003	21.3333	81.3333	1.83	6.96667	1.92862	4.71349e-05	0.00153137	yes	AT5G10930 (E=1e-144) CIPK5, SnRK3.24 | CIPK5 (CBL-INTERACTING PROTEIN KINASE 5); ATP binding / kinase/ protein kinase/ protein serine/threonine kinase	-	GO:0016772//transferase activity, transferring phosphorus-containing groups;GO:1901265//nucleoside phosphate binding;GO:0016301//kinase activity;GO:1901363//heterocyclic compound binding;GO:0003674//molecular_function;GO:0005488//binding;GO:0003824//catalytic activity;GO:0000166//nucleotide binding;GO:0097159//organic cyclic compound binding;GO:0016740//transferase activity;GO:0036094//small mole…	GO:0071704//organic substance metabolic process;GO:0050789//regulation of biological process;GO:0008150//biological_process;GO:0051716//cellular response to stimulus;GO:0043412//macromolecule modification;GO:0044267//cellular protein metabolic process;GO:0044237//cellular metabolic process;GO:0044699//single-organism process;GO:0065007//biological regulation;GO:0009987//cellular process;GO:000715…
Bra009019	45	195.777	3.24333	14.5467	2.16514	1.76058e-06	8.06763e-05	yes	AT5G10610 (E=2e-236) CYP81K1 | CYP81K1; electron carrier/ heme binding / iron ion binding / monooxygenase/ oxygen binding	-	GO:0003674//molecular_function;GO:0005488//binding;GO:0003824//catalytic activity	GO:0008152//metabolic process;GO:0008150//biological_process
Bra009020	427	1535.22	32.2867	114.023	1.82032	5.82962e-06	0.000238838	yes	AT5G10610 (E=3e-235) CYP81K1 | CYP81K1; electron carrier/ heme binding / iron ion binding / monooxygenase/ oxygen binding	-	GO:0003674//molecular_function;GO:0003824//catalytic activity;GO:0005488//binding	GO:0008150//biological_process;GO:0008152//metabolic process
Bra009030	562.667	188	17.92	5.89333	-1.60441	6.02019e-05	0.00188611	yes	-	-	-	-
Bra009037	401.333	65	51.46	8.24333	-2.64215	3.49901e-13	4.63998e-11	yes	AT5G10380 (E=1e-055) RING1 | RING1; protein binding / ubiquitin-protein ligase/ zinc ion binding	GO:0005623//cell;GO:0044464//cell part;GO:0071944//cell periphery;GO:0005575//cellular_component;GO:0016020//membrane;GO:0005886//plasma membrane	GO:0005488//binding;GO:0003824//catalytic activity;GO:0016740//transferase activity;GO:0003674//molecular_function;GO:0005515//protein binding	GO:0065007//biological regulation;GO:0007154//cell communication;GO:0050794//regulation of cellular process;GO:0006807//nitrogen compound metabolic process;GO:0034641//cellular nitrogen compound metabolic process;GO:0008152//metabolic process;GO:0009058//biosynthetic process;GO:0009607//response to biotic stimulus;GO:0008219//cell death;GO:0044699//single-organism process;GO:0006464//cellular pro…
Bra009048	1368.33	602	158.287	68.87	-1.20059	0.000172978	0.00464266	yes	AT5G10230 (E=1e-157) ANNAT7, ANN7 | ANNAT7 (ANNEXIN ARABIDOPSIS 7); calcium ion binding / calcium-dependent phospholipid binding	-	GO:0005488//binding;GO:0008289//lipid binding;GO:0003674//molecular_function	-
Bra009065	293	671.667	24.6467	56.4467	1.1955	0.000940463	0.0186423	yes	-	-	-	-
Bra009071	4.66667	21	0.726667	3.19333	2.1357	0.00144544	0.0261912	yes	-	-	-	-
Bra009075	0	15	0.001	1.52	10.5699	4.57081e-05	0.00148948	yes	AT2G19930 (E=5e-046) | RNA-dependent RNA polymerase family protein	-	GO:0003674//molecular_function;GO:0016740//transferase activity;GO:0003824//catalytic activity	GO:0008150//biological_process;GO:0008152//metabolic process;GO:0006807//nitrogen compound metabolic process;GO:0046483//heterocycle metabolic process;GO:0009987//cellular process;GO:1901360//organic cyclic compound metabolic process;GO:0006139//nucleobase-containing compound metabolic process;GO:0034641//cellular nitrogen compound metabolic process;GO:0009058//biosynthetic process;GO:0006725//ce…
Bra009079	13.3333	63	0.556667	2.65667	2.25473	0.000503886	0.0111517	yes	AT5G09840 (E=5e-282) | unknown protein	GO:0042579//microbody;GO:0005623//cell;GO:0043226//organelle;GO:0005739//mitochondrion;GO:0005575//cellular_component;GO:0043231//intracellular membrane-bounded organelle;GO:0043229//intracellular organelle;GO:0043227//membrane-bounded organelle;GO:0044444//cytoplasmic part;GO:0005622//intracellular;GO:0044424//intracellular part;GO:0005777//peroxisome;GO:0044464//cell part;GO:0005737//cytoplasm	-	GO:0008152//metabolic process;GO:0051179//localization;GO:0008150//biological_process;GO:0006810//transport;GO:0051234//establishment of localization
Bra009089	68.6667	190	2.99667	8.41	1.48875	0.000231279	0.00594933	yes	AT5G05130 (E=9e-271) | SNF2 domain-containing protein / helicase domain-containing protein / RING finger domain-containing protein	-	GO:0036094//small molecule binding;GO:0016787//hydrolase activity;GO:0097159//organic cyclic compound binding;GO:0003676//nucleic acid binding;GO:1901363//heterocyclic compound binding;GO:0000166//nucleotide binding;GO:0005488//binding;GO:0003824//catalytic activity;GO:0003674//molecular_function;GO:1901265//nucleoside phosphate binding;GO:0003677//DNA binding;GO:0005515//protein binding	-
Bra009101	2648	93.6667	477.613	17.0333	-4.80941	8.21184e-42	8.60627e-39	yes	AT5G05270 (E=2e-069) | chalcone-flavanone isomerase family protein	-	GO:0003824//catalytic activity;GO:0003674//molecular_function	GO:0009058//biosynthetic process;GO:0050896//response to stimulus;GO:0008152//metabolic process;GO:0008150//biological_process;GO:0009628//response to abiotic stimulus
Bra009105	36.6667	9.66667	4.89333	1.32	-1.89028	0.00152896	0.0273537	yes	AT5G05340 (E=4e-130) | peroxidase, putative	-	GO:0003674//molecular_function;GO:0005488//binding;GO:0003824//catalytic activity	GO:0008152//metabolic process;GO:0050896//response to stimulus;GO:0008150//biological_process;GO:0006950//response to stress
Bra009124	4.33333	23.6667	0.6	3.43333	2.51658	0.000499197	0.0110782	yes	-	-	-	-
Bra009126	682	298.667	56.2933	24.2367	-1.21577	4.76242e-05	0.00154417	yes	AT5G05690 (E=2e-130) CPD, CYP90A, CYP90, CBB3, DWF3, CYP90A1 | CPD (CONSTITUTIVE PHOTOMORPHOGENIC DWARF); electron carrier/ heme binding / iron ion binding / monooxygenase/ oxygen binding	-	GO:0003824//catalytic activity;GO:0005488//binding;GO:0003674//molecular_function	GO:0090567//reproductive shoot system development;GO:0048731//system development;GO:0009653//anatomical structure morphogenesis;GO:0009628//response to abiotic stimulus;GO:0044707//single-multicellular organism process;GO:0008150//biological_process;GO:0032502//developmental process;GO:0030154//cell differentiation;GO:0009058//biosynthetic process;GO:0071840//cellular component organization or bi…
Bra009136	38.6667	220	3.56	19.6633	2.46556	3.50195e-08	2.30781e-06	yes	AT5G05810 (E=7e-126) ATL43 | ATL43; protein binding / zinc ion binding	-	GO:0005515//protein binding;GO:0003674//molecular_function;GO:0005488//binding	-
Bra009141	133	5.33333	4.76667	0.183333	-4.70044	9.53767e-14	1.33564e-11	yes	AT5G22690 (E=3e-236) | disease resistance protein (TIR-NBS-LRR class), putative	-	GO:1901265//nucleoside phosphate binding;GO:0000166//nucleotide binding;GO:0003824//catalytic activity;GO:0005488//binding;GO:1901363//heterocyclic compound binding;GO:0036094//small molecule binding;GO:0016787//hydrolase activity;GO:0005515//protein binding;GO:0097159//organic cyclic compound binding;GO:0003674//molecular_function	GO:0065007//biological regulation;GO:0007165//signal transduction;GO:0044763//single-organism cellular process;GO:0008150//biological_process;GO:0009987//cellular process;GO:0007154//cell communication;GO:0050789//regulation of biological process;GO:0044699//single-organism process;GO:0044700//single organism signaling;GO:0006950//response to stress;GO:0050794//regulation of cellular process;GO:0…
Bra009143	14.6667	52.6667	1.19667	4.29333	1.84308	0.000639995	0.0135546	yes	AT5G05870 (E=6e-198) UGT76C1 | UGT76C1 (UDP-glucosyl transferase 76C1); UDP-glycosyltransferase/ cis-zeatin O-beta-D-glucosyltransferase/ cytokinin 7-beta-glucosyltransferase/ cytokinin 9-beta-glucosyltransferase/ trans-zeatin O-beta-D-glucosyltransferase/ transferase, transferring gly	-	GO:0003674//molecular_function;GO:0016740//transferase activity;GO:0003824//catalytic activity	GO:0008152//metabolic process;GO:0008150//biological_process
Bra009155	111	258.667	5.63667	13.03	1.20892	0.000638518	0.0135322	yes	AT5G05970 (E=1e-297) NEDD1 | NEDD1 (NEURAL PRECURSOR CELL EXPRESSED, DEVELOPMENTALLY DOWN-REGULATED GENE 1); nucleotide binding	GO:0005622//intracellular;GO:0005623//cell;GO:0005575//cellular_component;GO:0044464//cell part;GO:0043228//non-membrane-bounded organelle;GO:0044424//intracellular part;GO:0043229//intracellular organelle;GO:0005856//cytoskeleton;GO:0043226//organelle;GO:0043232//intracellular non-membrane-bounded organelle	GO:0003674//molecular_function;GO:0005488//binding;GO:0005515//protein binding	GO:0032501//multicellular organismal process;GO:0044699//single-organism process;GO:0044763//single-organism cellular process;GO:0016043//cellular component organization;GO:0044767//single-organism developmental process;GO:0007049//cell cycle;GO:0009987//cellular process;GO:0044707//single-multicellular organism process;GO:0008150//biological_process;GO:0071840//cellular component organization or…
Bra009158	224	709	8.71667	27.3567	1.65004	2.99787e-08	2.00407e-06	yes	AT5G06050 (E=0.0) | dehydration-responsive protein-related	GO:0005622//intracellular;GO:0005737//cytoplasm;GO:0044464//cell part;GO:0044424//intracellular part;GO:0005575//cellular_component;GO:0005623//cell	GO:0008135//translation factor activity, RNA binding;GO:0097159//organic cyclic compound binding;GO:0000166//nucleotide binding;GO:0036094//small molecule binding;GO:0003676//nucleic acid binding;GO:0003824//catalytic activity;GO:0003674//molecular_function;GO:0005488//binding;GO:0003723//RNA binding;GO:0016740//transferase activity;GO:1901363//heterocyclic compound binding;GO:1901265//nucleoside…	GO:0071704//organic substance metabolic process;GO:0044260//cellular macromolecule metabolic process;GO:0034645//cellular macromolecule biosynthetic process;GO:0044267//cellular protein metabolic process;GO:0009058//biosynthetic process;GO:0019538//protein metabolic process;GO:0008150//biological_process;GO:0043170//macromolecule metabolic process;GO:1901566//organonitrogen compound biosynthetic …
Bra009165	0	35.6667	0.001	8.65333	13.079	1.8014e-12	2.24236e-10	yes	AT3G11510 (E=3e-063) | 40S ribosomal protein S14 (RPS14B)	GO:0005623//cell;GO:0005840//ribosome;GO:0043232//intracellular non-membrane-bounded organelle;GO:0005737//cytoplasm;GO:0044444//cytoplasmic part;GO:1990904//ribonucleoprotein complex;GO:0043228//non-membrane-bounded organelle;GO:0044464//cell part;GO:0030529//intracellular ribonucleoprotein complex;GO:0005622//intracellular;GO:0044424//intracellular part;GO:0043226//organelle;GO:0005575//cellula…	GO:0005198//structural molecule activity;GO:0003674//molecular_function	GO:0009058//biosynthetic process;GO:1901566//organonitrogen compound biosynthetic process;GO:0044271//cellular nitrogen compound biosynthetic process;GO:0006807//nitrogen compound metabolic process;GO:0008152//metabolic process;GO:0009059//macromolecule biosynthetic process;GO:0006412//translation;GO:0034641//cellular nitrogen compound metabolic process;GO:0006518//peptide metabolic process;GO:00…
Bra009167	72	2.33333	5.45333	0.176667	-4.94804	1.11998e-13	1.55499e-11	yes	AT5G43610 (E=2e-199) ATSUC6 | ATSUC6 (Sucrose-proton symporter 6); carbohydrate transmembrane transporter/ sucrose:hydrogen symporter/ sugar:hydrogen symporter	GO:0005886//plasma membrane;GO:0071944//cell periphery;GO:0044464//cell part;GO:0005623//cell;GO:0005575//cellular_component;GO:0016020//membrane	GO:0003674//molecular_function;GO:0005215//transporter activity	GO:0006810//transport;GO:0051179//localization;GO:0051234//establishment of localization;GO:0009987//cellular process;GO:0008150//biological_process
Bra009169	20.3333	5.33333	0.883333	0.23	-1.94132	0.00310412	0.0480466	yes	-	-	-	-
Bra009188	98.07	233	14.1233	32.9833	1.22366	0.00106168	0.0205441	yes	-	-	-	-
Bra009191	16.6667	60.6667	0.61	2.17	1.83081	0.00110805	0.0212762	yes	AT5G06400 (E=0.0) | pentatricopeptide (PPR) repeat-containing protein	-	GO:0005488//binding;GO:0005515//protein binding;GO:0003674//molecular_function	-
Bra009202	168.333	0	55.7	0.001	-15.7654	6.18422e-21	1.79392e-18	yes	-	-	-	-
Bra009203	2535.33	18.6667	122.327	0.983333	-6.95884	8.47584e-32	4.91735e-29	yes	AT5G06530 (E=0.0) | ABC transporter family protein	GO:0016020//membrane;GO:0005575//cellular_component	GO:0003824//catalytic activity;GO:0036094//small molecule binding;GO:1901363//heterocyclic compound binding;GO:0000166//nucleotide binding;GO:0097159//organic cyclic compound binding;GO:0016787//hydrolase activity;GO:1901265//nucleoside phosphate binding;GO:0005488//binding;GO:0003674//molecular_function	-
Bra009221	717.667	14	73.6467	1.46667	-5.65001	2.85905e-44	3.44028e-41	yes	AT5G06730 (E=2e-148) | peroxidase, putative	GO:0043226//organelle;GO:0044444//cytoplasmic part;GO:0005737//cytoplasm;GO:0005622//intracellular;GO:0044424//intracellular part;GO:0005623//cell;GO:0043229//intracellular organelle;GO:0044464//cell part;GO:0043227//membrane-bounded organelle;GO:0005773//vacuole;GO:0043231//intracellular membrane-bounded organelle;GO:0005575//cellular_component;GO:0016020//membrane	GO:0005488//binding;GO:0003674//molecular_function;GO:0003824//catalytic activity	GO:0008150//biological_process;GO:0008152//metabolic process;GO:0050896//response to stimulus;GO:0006950//response to stress
Bra009226	21	90.3333	2.42667	10.89	2.16596	0.000117801	0.00336312	yes	AT5G06780 (E=1e-125) | emsy N terminus domain-containing protein / ENT domain-containing protein	-	-	GO:0008152//metabolic process;GO:0008150//biological_process;GO:0009987//cellular process;GO:0009058//biosynthetic process;GO:0044238//primary metabolic process;GO:0071704//organic substance metabolic process;GO:0005975//carbohydrate metabolic process
Bra009228	20.3333	2.33333	1.99667	0.233333	-3.09713	8.18794e-05	0.00245631	yes	AT5G06800 (E=2e-122) | myb family transcription factor	-	GO:0003677//DNA binding;GO:0003674//molecular_function;GO:0005488//binding;GO:0003676//nucleic acid binding;GO:1901363//heterocyclic compound binding;GO:0097159//organic cyclic compound binding;GO:0003682//chromatin binding;GO:0044877//macromolecular complex binding	-
Bra009236	411.667	97.3333	46.5	11.0967	-2.0671	1.48263e-06	6.94078e-05	yes	AT5G06860 (E=5e-138) PGIP1, ATPGIP1 | PGIP1 (POLYGALACTURONASE INHIBITING PROTEIN 1); protein binding	-	GO:0003674//molecular_function;GO:0005488//binding;GO:0005515//protein binding	-
Bra009237	169	42	18.82	4.72667	-1.99337	1.23407e-05	0.000468932	yes	AT5G06860 (E=5e-136) PGIP1, ATPGIP1 | PGIP1 (POLYGALACTURONASE INHIBITING PROTEIN 1); protein binding	-	GO:0005515//protein binding;GO:0003674//molecular_function;GO:0005488//binding	-
Bra009238	201	25	22.8967	2.67333	-3.09843	5.7391e-09	4.37694e-07	yes	AT5G06860 (E=4e-133) PGIP1, ATPGIP1 | PGIP1 (POLYGALACTURONASE INHIBITING PROTEIN 1); protein binding	-	GO:0005515//protein binding;GO:0005488//binding;GO:0003674//molecular_function	-
Bra009239	67.3333	175.667	3.44333	8.87333	1.36567	0.00120025	0.0226298	yes	-	-	-	-
Bra009242	69.6667	1.66667	15.2867	0.4	-5.25613	1.74914e-07	1.01298e-05	yes	-	-	-	-
Bra009254	15	138.667	1.75667	16.3167	3.21543	4.32762e-06	0.000181889	yes	AT5G07530 (E=7e-009) GRP17, ATGRP17, ATGRP-7 | GRP17 (GLYCINE RICH PROTEIN 17); lipid binding	GO:0016020//membrane;GO:0005575//cellular_component;GO:0044464//cell part;GO:0005622//intracellular;GO:0005623//cell	-	-
Bra009255	17	199	5.69	65.93	3.53443	2.38404e-10	2.188e-08	yes	AT5G07530 (E=1e-015) GRP17, ATGRP17, ATGRP-7 | GRP17 (GLYCINE RICH PROTEIN 17); lipid binding	GO:0005622//intracellular;GO:0044464//cell part;GO:0005575//cellular_component;GO:0016020//membrane;GO:0005623//cell	-	-
Bra009257	42	130.333	6.33333	19.2867	1.60657	0.000184369	0.004922	yes	AT5G07500 (E=8e-126) PEI1 | PEI1; nucleic acid binding / transcription factor/ zinc-mediated transcriptional activator	-	GO:0005488//binding;GO:0003674//molecular_function;GO:0001071//nucleic acid binding transcription factor activity;GO:0003700//transcription factor activity, sequence-specific DNA binding	GO:0007275//multicellular organism development;GO:0009790//embryo development;GO:0032501//multicellular organismal process;GO:0006725//cellular aromatic compound metabolic process;GO:0009987//cellular process;GO:0034641//cellular nitrogen compound metabolic process;GO:0044699//single-organism process;GO:0006807//nitrogen compound metabolic process;GO:0044237//cellular metabolic process;GO:0008152…
Bra009295	94	275.333	11.5267	33.9767	1.55957	8.2635e-06	0.000325816	yes	AT3G12480 (E=5e-077) NF-YC11 | NF-YC11 (NUCLEAR FACTOR Y, SUBUNIT C11); DNA binding / transcription factor	GO:0043231//intracellular membrane-bounded organelle;GO:0005622//intracellular;GO:0043229//intracellular organelle;GO:0005634//nucleus;GO:0044464//cell part;GO:0044424//intracellular part;GO:0043227//membrane-bounded organelle;GO:0005575//cellular_component;GO:0043226//organelle;GO:0005623//cell	GO:0005515//protein binding;GO:1901363//heterocyclic compound binding;GO:0003676//nucleic acid binding;GO:0097159//organic cyclic compound binding;GO:0003677//DNA binding;GO:0003674//molecular_function;GO:0005488//binding	-
Bra009305	60.3333	158.667	4.94667	13.05	1.39952	0.000844919	0.0169558	yes	AT5G07720 (E=1e-232) | galactosyl transferase GMA12/MNN10 family protein	GO:0005575//cellular_component;GO:0016020//membrane	GO:0003824//catalytic activity;GO:0016740//transferase activity;GO:0003674//molecular_function	GO:0071704//organic substance metabolic process;GO:0009987//cellular process;GO:0008152//metabolic process;GO:0044238//primary metabolic process;GO:0005975//carbohydrate metabolic process;GO:0008150//biological_process
Bra009309	10.6667	53.3333	0.786667	3.97333	2.33653	0.000245528	0.00622227	yes	AT5G07820 (E=1e-078) | FUNCTIONS IN: molecular_function unknown; INVOLVED IN: biological_process unknown; LOCATED IN: cellular_component unknown; EXPRESSED IN: 11 plant structures; EXPRESSED DURING: 8 growth stages; CONTAINS InterPro DOMAIN/s: Calmodulin-binding, plant (InterPro:IPR012417); BEST Arabidopsis thaliana protein match is: chromosome scaffold protein-related (TAIR:AT5G61260.1); Has 109…	-	GO:0005515//protein binding;GO:0003674//molecular_function;GO:0005488//binding	-
Bra009312	12392.7	3251	909.38	238.247	-1.93243	1.25128e-09	1.0598e-07	yes	AT5G07990 (E=4e-244) TT7, CYP75B1, D501 | TT7 (TRANSPARENT TESTA 7); flavonoid 3'-monooxygenase/ oxygen binding	-	GO:0005488//binding;GO:0003674//molecular_function;GO:0003824//catalytic activity	GO:0009058//biosynthetic process;GO:0008150//biological_process;GO:0050896//response to stimulus;GO:0008152//metabolic process;GO:0009628//response to abiotic stimulus
Bra009316	0.333333	34.6667	0.0333333	3.43667	6.6879	7.15534e-09	5.35645e-07	yes	AT5G08030 (E=2e-186) | glycerophosphoryl diester phosphodiesterase family protein	-	GO:0003824//catalytic activity;GO:0003674//molecular_function;GO:0016787//hydrolase activity	GO:0006629//lipid metabolic process;GO:0044699//single-organism process;GO:0009987//cellular process;GO:0071704//organic substance metabolic process;GO:0005975//carbohydrate metabolic process;GO:0008150//biological_process;GO:0044238//primary metabolic process;GO:0044710//single-organism metabolic process;GO:0008152//metabolic process
Bra009322	275.667	564	18.8767	38.2267	1.01798	0.000535453	0.0117702	yes	AT5G08130 (E=1e-197) BIM1 | BIM1; DNA binding / protein binding / transcription factor	-	GO:0005488//binding;GO:0005515//protein binding;GO:0003674//molecular_function	-
Bra009336	189.027	554	20.1267	58.7833	1.5463	4.14101e-07	2.22744e-05	yes	AT5G08300 (E=1e-188) | succinyl-CoA ligase (GDP-forming) alpha-chain, mitochondrial, putative / succinyl-CoA synthetase, alpha chain, putative / SCS-alpha, putative	-	GO:0016740//transferase activity;GO:0003824//catalytic activity;GO:0005488//binding;GO:0003674//molecular_function	GO:0008152//metabolic process;GO:0008150//biological_process
Bra009341	10.6667	72	1.06667	6.85	2.68299	2.5213e-06	0.000111752	yes	AT5G08460 (E=7e-170) | GDSL-motif lipase/hydrolase family protein	-	GO:0003824//catalytic activity;GO:0016787//hydrolase activity;GO:0003674//molecular_function	GO:1901360//organic cyclic compound metabolic process;GO:0008150//biological_process;GO:0008152//metabolic process;GO:0006629//lipid metabolic process;GO:0044238//primary metabolic process;GO:0044237//cellular metabolic process;GO:0046483//heterocycle metabolic process;GO:0009987//cellular process;GO:0009058//biosynthetic process;GO:0006725//cellular aromatic compound metabolic process;GO:0044699…
Bra009343	0	26.6667	0.001	9.05667	13.1448	8.16176e-07	4.11112e-05	yes	-	-	-	-
Bra009344	312.333	1175.67	18.83	71.84	1.93175	3.73384e-05	0.00124675	yes	AT5G08500 (E=2e-314) | transmembrane CLPTM1 family protein	GO:0016020//membrane;GO:0005575//cellular_component	-	GO:0008152//metabolic process;GO:0050896//response to stimulus;GO:0007049//cell cycle;GO:0006950//response to stress;GO:0071704//organic substance metabolic process;GO:0016043//cellular component organization;GO:0034641//cellular nitrogen compound metabolic process;GO:0006139//nucleobase-containing compound metabolic process;GO:0071840//cellular component organization or biogenesis;GO:0008150//bi…
Bra009346	20.6667	63.6667	2.54333	7.87667	1.63086	0.0016065	0.0284744	yes	AT5G08520 (E=2e-115) | myb family transcription factor	GO:0005634//nucleus;GO:0044424//intracellular part;GO:0005575//cellular_component;GO:0043231//intracellular membrane-bounded organelle;GO:0043227//membrane-bounded organelle;GO:0043226//organelle;GO:0005623//cell;GO:0044464//cell part;GO:0043229//intracellular organelle;GO:0005622//intracellular	GO:0003674//molecular_function;GO:0005488//binding;GO:0097159//organic cyclic compound binding;GO:0003676//nucleic acid binding;GO:1901363//heterocyclic compound binding;GO:0003677//DNA binding;GO:0003682//chromatin binding;GO:0044877//macromolecular complex binding	-
Bra009352	754.667	1572.67	55.3667	113.033	1.02966	0.000956921	0.0188993	yes	AT5G08570 (E=6e-282) | pyruvate kinase, putative	-	GO:0016772//transferase activity, transferring phosphorus-containing groups;GO:0016740//transferase activity;GO:0003674//molecular_function;GO:0003824//catalytic activity;GO:0005488//binding;GO:0016301//kinase activity	GO:0046483//heterocycle metabolic process;GO:1901360//organic cyclic compound metabolic process;GO:0006725//cellular aromatic compound metabolic process;GO:0005975//carbohydrate metabolic process;GO:0009987//cellular process;GO:0044237//cellular metabolic process;GO:0044238//primary metabolic process;GO:0006807//nitrogen compound metabolic process;GO:0034641//cellular nitrogen compound metabolic …
Bra009358	141.333	434	15.6033	47.74	1.61334	1.1409e-05	0.000437109	yes	AT5G08640 (E=1e-174) FLS | FLS (FLAVONOL SYNTHASE); flavonol synthase	-	GO:0005488//binding;GO:0003824//catalytic activity;GO:0003674//molecular_function	GO:0050896//response to stimulus;GO:0008150//biological_process;GO:0009628//response to abiotic stimulus;GO:0009058//biosynthetic process;GO:0008152//metabolic process
Bra009369	7.66667	158	0.633333	13.9533	4.4615	1.1918e-12	1.52442e-10	yes	AT5G08780 (E=3e-123) | histone H1/H5 family protein	GO:0005622//intracellular;GO:0043231//intracellular membrane-bounded organelle;GO:0005575//cellular_component;GO:0043229//intracellular organelle;GO:0043226//organelle;GO:0043227//membrane-bounded organelle;GO:0044464//cell part;GO:0005634//nucleus;GO:0005623//cell;GO:0044424//intracellular part	GO:0003677//DNA binding;GO:1901363//heterocyclic compound binding;GO:0097159//organic cyclic compound binding;GO:0003674//molecular_function;GO:0005488//binding;GO:0003676//nucleic acid binding	GO:0016043//cellular component organization;GO:0008150//biological_process;GO:0009987//cellular process;GO:0071840//cellular component organization or biogenesis
Bra009376	2.33333	17.3333	0.766667	5.4	2.81629	0.000445486	0.010079	yes	-	-	-	-
Bra009385	36.6667	118	4.22333	13.7133	1.69913	0.000453358	0.0102215	yes	AT5G09460 (E=7e-083) | transcription factor/ transcription regulator	-	GO:0001071//nucleic acid binding transcription factor activity;GO:0003674//molecular_function;GO:0003700//transcription factor activity, sequence-specific DNA binding	GO:0044237//cellular metabolic process;GO:0006139//nucleobase-containing compound metabolic process;GO:0044238//primary metabolic process;GO:0006807//nitrogen compound metabolic process;GO:0008152//metabolic process;GO:0008150//biological_process;GO:0034641//cellular nitrogen compound metabolic process;GO:0009987//cellular process;GO:0071704//organic substance metabolic process;GO:0006725//cellul…
Bra009387	20.6667	0	5.57	0.001	-12.4435	3.21416e-06	0.000138863	yes	-	-	-	-
Bra009389	16	62.6667	2.04	8.02	1.97503	0.000186989	0.00498775	yes	-	-	-	-
Bra009392	345	940	60.6533	164.033	1.43533	5.8583e-07	3.05016e-05	yes	AT4G32210 (E=2e-079) SDH3-2 | SDH3-2; succinate dehydrogenase	-	GO:0003674//molecular_function;GO:0003824//catalytic activity	-
Bra009401	818.99	362.65	56.9233	24.9167	-1.19191	0.00183931	0.0316176	yes	AT5G09760 (E=3e-262) | pectinesterase family protein	GO:0005623//cell;GO:0030312//external encapsulating structure;GO:0044464//cell part;GO:0005575//cellular_component;GO:0071944//cell periphery;GO:0005618//cell wall	GO:0003674//molecular_function;GO:0003824//catalytic activity;GO:0016787//hydrolase activity;GO:0030234//enzyme regulator activity;GO:0098772//molecular function regulator	GO:0009056//catabolic process;GO:0071840//cellular component organization or biogenesis;GO:0044238//primary metabolic process;GO:0008150//biological_process;GO:0008152//metabolic process;GO:0009987//cellular process;GO:0071704//organic substance metabolic process;GO:0005975//carbohydrate metabolic process;GO:0016043//cellular component organization
Bra009409	107	353.667	5.94	19.4567	1.71173	1.0645e-06	5.1619e-05	yes	AT5G04940 (E=1e-273) SUVH1 | SUVH1 (SU(VAR)3-9 HOMOLOG 1); histone methyltransferase	GO:0043226//organelle;GO:0005622//intracellular;GO:0043227//membrane-bounded organelle;GO:0005623//cell;GO:0044424//intracellular part;GO:0005634//nucleus;GO:0044464//cell part;GO:0005575//cellular_component;GO:0043231//intracellular membrane-bounded organelle;GO:0043229//intracellular organelle	GO:0005488//binding;GO:0003674//molecular_function;GO:0005515//protein binding;GO:0003824//catalytic activity;GO:0016740//transferase activity	GO:0071840//cellular component organization or biogenesis;GO:0016043//cellular component organization;GO:0044237//cellular metabolic process;GO:0008150//biological_process;GO:0006464//cellular protein modification process;GO:0071704//organic substance metabolic process;GO:0043170//macromolecule metabolic process;GO:0043412//macromolecule modification;GO:0044267//cellular protein metabolic process…
Bra009419	7.33333	0	2.71	0.001	-11.4041	0.000188044	0.00500427	yes	-	-	-	-
Bra009421	778.333	283.333	38.96	14.24	-1.45204	6.16311e-07	3.19351e-05	yes	-	-	-	-
Bra009428	168	36.6667	23.9633	5.14	-2.22099	2.41024e-07	1.36185e-05	yes	AT5G04820 (E=2e-089) ATOFP13, OFP13 | OFP13 (ARABIDOPSIS THALIANA OVATE FAMILY PROTEIN 13)	-	-	GO:0009987//cellular process;GO:0071704//organic substance metabolic process;GO:0046483//heterocycle metabolic process;GO:0009058//biosynthetic process;GO:0006139//nucleobase-containing compound metabolic process;GO:0008150//biological_process;GO:0034641//cellular nitrogen compound metabolic process;GO:0006725//cellular aromatic compound metabolic process;GO:0044238//primary metabolic process;GO:…
Bra009435	169.333	15.3333	11.7267	1.10333	-3.40985	1.46757e-11	1.6273e-09	yes	AT5G04710 (E=1e-262) | aspartyl aminopeptidase, putative	GO:0005622//intracellular;GO:0043226//organelle;GO:0005575//cellular_component;GO:0043227//membrane-bounded organelle;GO:0009536//plastid;GO:0044444//cytoplasmic part;GO:0044464//cell part;GO:0005623//cell;GO:0043229//intracellular organelle;GO:0043231//intracellular membrane-bounded organelle;GO:0005737//cytoplasm;GO:0044424//intracellular part	GO:0003674//molecular_function;GO:0016787//hydrolase activity;GO:0003824//catalytic activity;GO:0005488//binding	GO:0008152//metabolic process;GO:0044238//primary metabolic process;GO:0071704//organic substance metabolic process;GO:0008150//biological_process;GO:0043170//macromolecule metabolic process;GO:0019538//protein metabolic process
Bra009445	647	21.3333	49.65	1.65333	-4.90834	1.08276e-15	1.92228e-13	yes	AT5G04530 (E=8e-236) KCS19 | KCS19 (3-KETOACYL-COA SYNTHASE 19); acyltransferase/ catalytic/ transferase, transferring acyl groups other than amino-acyl groups	GO:0005575//cellular_component;GO:0016020//membrane	GO:0003674//molecular_function;GO:0003824//catalytic activity;GO:0016740//transferase activity	GO:0008150//biological_process;GO:0044710//single-organism metabolic process;GO:0008152//metabolic process;GO:0009058//biosynthetic process;GO:0044238//primary metabolic process;GO:0006629//lipid metabolic process;GO:0009987//cellular process;GO:0044699//single-organism process;GO:0071704//organic substance metabolic process
Bra009451	12.6667	55.3333	3.51	14.9833	2.09382	0.000167337	0.00451922	yes	-	-	-	-
Bra009475	4.58333	0.0366667	1.65	0.0133333	-6.95128	0.00276555	0.0438506	yes	AT5G04240 (E=4e-054) ELF6 | ELF6 (EARLY FLOWERING 6); transcription factor	-	GO:1901363//heterocyclic compound binding;GO:0097159//organic cyclic compound binding;GO:0003676//nucleic acid binding;GO:0005488//binding;GO:0003674//molecular_function	-
Bra009510	8.66667	0	1.47333	0.001	-10.5249	0.00068814	0.0143775	yes	AT5G03790 (E=1e-095) ATHB51, LMI1, HB51 | HB51; DNA binding / sequence-specific DNA binding / transcription factor	GO:0005575//cellular_component;GO:0043226//organelle;GO:0005622//intracellular;GO:0005623//cell;GO:0044464//cell part;GO:0043227//membrane-bounded organelle;GO:0044424//intracellular part;GO:0043229//intracellular organelle;GO:0005634//nucleus;GO:0043231//intracellular membrane-bounded organelle	GO:0097159//organic cyclic compound binding;GO:0003674//molecular_function;GO:0005488//binding;GO:1901363//heterocyclic compound binding;GO:0003677//DNA binding;GO:0003676//nucleic acid binding;GO:0001071//nucleic acid binding transcription factor activity;GO:0003700//transcription factor activity, sequence-specific DNA binding	GO:0046483//heterocycle metabolic process;GO:1901360//organic cyclic compound metabolic process;GO:0034641//cellular nitrogen compound metabolic process;GO:0044237//cellular metabolic process;GO:0008150//biological_process;GO:0009987//cellular process;GO:0006725//cellular aromatic compound metabolic process;GO:0006807//nitrogen compound metabolic process;GO:0071704//organic substance metabolic pr…
Bra009513	239	824.333	24.78	84.2133	1.76487	3.4018e-08	2.24636e-06	yes	AT5G03740 (E=2e-031) HD2C, HDT3 | HD2C (HISTONE DEACETYLASE 2C); histone deacetylase/ nucleic acid binding / transcription repressor/ zinc ion binding	GO:0043233//organelle lumen;GO:0005730//nucleolus;GO:0005575//cellular_component;GO:0044422//organelle part;GO:0043228//non-membrane-bounded organelle;GO:0044464//cell part;GO:0005622//intracellular;GO:0043232//intracellular non-membrane-bounded organelle;GO:0044428//nuclear part;GO:0005634//nucleus;GO:0031981//nuclear lumen;GO:0043227//membrane-bounded organelle;GO:0043226//organelle;GO:0043231/…	GO:0005488//binding;GO:0003674//molecular_function	GO:0044238//primary metabolic process;GO:0036211//protein modification process;GO:0009987//cellular process;GO:0032501//multicellular organismal process;GO:0006464//cellular protein modification process;GO:0044707//single-multicellular organism process;GO:0044267//cellular protein metabolic process;GO:0009628//response to abiotic stimulus;GO:0044260//cellular macromolecule metabolic process;GO:00…
Bra009521	882.333	1937.67	37.6867	82.9833	1.13877	0.000326329	0.00788847	yes	AT5G03650 (E=0.0) SBE2.2 | SBE2.2 (starch branching enzyme 2.2); 1,4-alpha-glucan branching enzyme	GO:0005623//cell;GO:0044424//intracellular part;GO:0005622//intracellular;GO:0043226//organelle;GO:0009536//plastid;GO:0005737//cytoplasm;GO:0005575//cellular_component;GO:0043231//intracellular membrane-bounded organelle;GO:0043227//membrane-bounded organelle;GO:0044464//cell part;GO:0043229//intracellular organelle;GO:0044444//cytoplasmic part	GO:0003824//catalytic activity;GO:0016740//transferase activity;GO:0003674//molecular_function;GO:0016787//hydrolase activity;GO:0005488//binding	GO:0006091//generation of precursor metabolites and energy;GO:0034641//cellular nitrogen compound metabolic process;GO:0044238//primary metabolic process;GO:0006807//nitrogen compound metabolic process;GO:0046483//heterocycle metabolic process;GO:0071704//organic substance metabolic process;GO:0044710//single-organism metabolic process;GO:0044699//single-organism process;GO:0006725//cellular arom…
Bra009576	242.667	694.333	17.13	48.7333	1.50838	8.46907e-06	0.000333113	yes	AT5G02620 (E=1e-249) | ankyrin repeat family protein	GO:0012505//endomembrane system;GO:0043226//organelle;GO:0044444//cytoplasmic part;GO:0043227//membrane-bounded organelle;GO:0005783//endoplasmic reticulum;GO:0043229//intracellular organelle;GO:0071944//cell periphery;GO:0005623//cell;GO:0005622//intracellular;GO:0016020//membrane;GO:0044464//cell part;GO:0005886//plasma membrane;GO:0044424//intracellular part;GO:0005575//cellular_component;GO:0…	GO:0005488//binding;GO:0005515//protein binding;GO:0003674//molecular_function	-
Bra009590	0.666667	11.3333	0.25	3.86333	3.94985	0.000446711	0.0100996	yes	-	-	-	-
Bra009595	9.33333	75.6667	4.35667	34.7767	2.99682	8.94449e-07	4.45019e-05	yes	AT3G09390 (E=8e-019) MT2A, ATMT-K, ATMT-1 | MT2A (METALLOTHIONEIN 2A); copper ion binding	-	GO:0003674//molecular_function;GO:0005488//binding	-
Bra009656	176	21	44.1467	5.13	-3.10527	6.6023e-11	6.62043e-09	yes	-	-	-	-
Bra009657	2367.33	1152.17	160.21	77.4133	-1.04931	0.000401902	0.00934006	yes	AT2G17200 (E=6e-206) | ubiquitin family protein	-	GO:0005515//protein binding;GO:0005488//binding;GO:0003674//molecular_function	-
Bra009665	74	22.6667	3.88333	1.16333	-1.73903	0.00028908	0.00710433	yes	-	-	-	-
Bra009679	101.667	33	23.5	7.65333	-1.6185	0.000408879	0.00944812	yes	AT5G23395 (E=1e-049) | FUNCTIONS IN: molecular_function unknown; INVOLVED IN: biological_process unknown; LOCATED IN: chloroplast; CONTAINS InterPro DOMAIN/s: CHCH (InterPro:IPR010625); Has 224 Blast hits to 224 proteins in 106 species: Archae - 0; Bacteria - 0; Metazoa - 109; Fungi - 94; Plants - 20; Viruses - 0; Other Eukaryotes - 1 (source: NCBI BLink).	GO:0005777//peroxisome;GO:0005622//intracellular;GO:0043227//membrane-bounded organelle;GO:0042579//microbody;GO:0005575//cellular_component;GO:0043226//organelle;GO:0044444//cytoplasmic part;GO:0005737//cytoplasm;GO:0005739//mitochondrion;GO:0043231//intracellular membrane-bounded organelle;GO:0043229//intracellular organelle;GO:0044464//cell part;GO:0044424//intracellular part;GO:0005623//cell	-	GO:0016043//cellular component organization;GO:0051234//establishment of localization;GO:0008150//biological_process;GO:0006810//transport;GO:0009987//cellular process;GO:0071840//cellular component organization or biogenesis;GO:0051179//localization
Bra009681	16	1.33333	3.71667	0.3	-3.63097	4.51831e-05	0.00147681	yes	AT5G23420 (E=6e-017) HMGB6 | HMGB6; transcription factor	-	-	GO:0009987//cellular process;GO:0016043//cellular component organization;GO:0071840//cellular component organization or biogenesis;GO:0008150//biological_process
Bra009682	0	16.6433	0.001	4.03333	11.9778	1.18235e-05	0.000452453	yes	AT3G24495 (E=3e-029) MSH7, MSH6-2, ATMSH7 | MSH7 (MUTS HOMOLOG 7); ATP binding / damaged DNA binding / mismatched DNA binding	-	GO:0016740//transferase activity;GO:0036094//small molecule binding;GO:0000166//nucleotide binding;GO:1901363//heterocyclic compound binding;GO:0003676//nucleic acid binding;GO:0003674//molecular_function;GO:1901265//nucleoside phosphate binding;GO:0005488//binding;GO:0003824//catalytic activity;GO:0097159//organic cyclic compound binding;GO:0003677//DNA binding	GO:0006950//response to stress;GO:0006807//nitrogen compound metabolic process;GO:1901360//organic cyclic compound metabolic process;GO:0050896//response to stimulus;GO:0071704//organic substance metabolic process;GO:0044237//cellular metabolic process;GO:0044260//cellular macromolecule metabolic process;GO:0044238//primary metabolic process;GO:0034641//cellular nitrogen compound metabolic proces…
Bra009683	276.667	747	11.1067	30.47	1.45596	7.99021e-06	0.000316578	yes	AT5G23430 (E=0.0) | transducin family protein / WD-40 repeat family protein	GO:0044464//cell part;GO:0043226//organelle;GO:0005622//intracellular;GO:0005737//cytoplasm;GO:0005575//cellular_component;GO:0043232//intracellular non-membrane-bounded organelle;GO:0044424//intracellular part;GO:0005856//cytoskeleton;GO:0043228//non-membrane-bounded organelle;GO:0043229//intracellular organelle;GO:0005623//cell	GO:0003674//molecular_function;GO:0005515//protein binding;GO:0005488//binding	GO:0009987//cellular process;GO:0008150//biological_process
Bra009707	107.667	15	19.2133	2.66333	-2.8508	6.67599e-09	5.0441e-07	yes	-	-	-	-
Bra009714	90	18.6667	4.90333	1.02667	-2.25579	0.00072927	0.0151201	yes	AT5G23910 (E=4e-090) | ATP binding / microtubule motor	GO:0043232//intracellular non-membrane-bounded organelle;GO:0044424//intracellular part;GO:0005856//cytoskeleton;GO:0044464//cell part;GO:0043229//intracellular organelle;GO:0005623//cell;GO:0005575//cellular_component;GO:0043228//non-membrane-bounded organelle;GO:0005622//intracellular;GO:0043226//organelle	GO:0036094//small molecule binding;GO:0016462//pyrophosphatase activity;GO:0003676//nucleic acid binding;GO:0003824//catalytic activity;GO:1901265//nucleoside phosphate binding;GO:0005515//protein binding;GO:0003677//DNA binding;GO:0003674//molecular_function;GO:0097159//organic cyclic compound binding;GO:0005488//binding;GO:0003774//motor activity;GO:0017111//nucleoside-triphosphatase activity;G…	GO:0006950//response to stress;GO:0090304//nucleic acid metabolic process;GO:0044238//primary metabolic process;GO:0034641//cellular nitrogen compound metabolic process;GO:0046483//heterocycle metabolic process;GO:0050896//response to stimulus;GO:0008150//biological_process;GO:0009987//cellular process;GO:1901360//organic cyclic compound metabolic process;GO:0044237//cellular metabolic process;GO…
Bra009716	573.207	188.397	47.04	14.97	-1.65181	5.16247e-06	0.00021366	yes	AT5G23940 (E=7e-226) EMB3009 | EMB3009 (embryo defective 3009); transferase/ transferase, transferring acyl groups other than amino-acyl groups	-	GO:0003674//molecular_function;GO:0016740//transferase activity;GO:0003824//catalytic activity	-
Bra009727	7.33333	0.666667	2.17667	0.186667	-3.54358	0.00216599	0.035867	yes	-	-	-	-
Bra009738	1.33333	90	0.09	6.6	6.1964	5.93978e-15	9.74634e-13	yes	AT5G24150 (E=3e-218) SQP1, SQE5 | SQP1; squalene monooxygenase	GO:0016020//membrane;GO:0005575//cellular_component	GO:0000166//nucleotide binding;GO:0036094//small molecule binding;GO:0097159//organic cyclic compound binding;GO:1901363//heterocyclic compound binding;GO:0003674//molecular_function;GO:0003824//catalytic activity;GO:0005488//binding;GO:1901265//nucleoside phosphate binding	GO:0008150//biological_process;GO:0008152//metabolic process
Bra009746	14.6667	2	1.05667	0.156667	-2.75375	0.00165662	0.0291245	yes	AT5G24290 (E=1e-064) | integral membrane family protein	GO:0005575//cellular_component;GO:0005623//cell;GO:0044464//cell part;GO:0005622//intracellular	GO:0005488//binding;GO:0005515//protein binding;GO:0003674//molecular_function;GO:0005215//transporter activity	GO:0008150//biological_process;GO:0006810//transport;GO:0051179//localization;GO:0009987//cellular process;GO:0051234//establishment of localization
Bra009755	14.6667	0	1.34333	0.001	-10.3916	3.68482e-06	0.000156492	yes	AT1G27540 (E=4e-092) | F-box family protein	-	GO:0003674//molecular_function;GO:0005515//protein binding;GO:0005488//binding	-
Bra009757	127	46	8.83	3.08333	-1.51792	0.00196302	0.0332863	yes	-	-	-	-
Bra009762	56.6667	0.666667	6.51667	0.07	-6.54064	6.28123e-14	8.95048e-12	yes	-	-	-	-
Bra009770	324.667	36.3333	36.0867	3.88667	-3.21486	2.9199e-14	4.33171e-12	yes	AT5G24520 (E=1e-176) TTG1, TTG | TTG1 (TRANSPARENT TESTA GLABRA 1); DNA binding / nucleotide binding / protein binding	GO:0043227//membrane-bounded organelle;GO:0044464//cell part;GO:0043229//intracellular organelle;GO:0043226//organelle;GO:0005634//nucleus;GO:0005737//cytoplasm;GO:0044424//intracellular part;GO:0043231//intracellular membrane-bounded organelle;GO:0005575//cellular_component;GO:0005623//cell;GO:0005622//intracellular	GO:0003674//molecular_function;GO:1901363//heterocyclic compound binding;GO:0003676//nucleic acid binding;GO:0003677//DNA binding;GO:0005488//binding;GO:0097159//organic cyclic compound binding;GO:0005515//protein binding	GO:0008150//biological_process;GO:0044767//single-organism developmental process;GO:0044699//single-organism process;GO:0044763//single-organism cellular process;GO:0044707//single-multicellular organism process;GO:0007275//multicellular organism development;GO:0032501//multicellular organismal process;GO:0048869//cellular developmental process;GO:0030154//cell differentiation;GO:0009987//cellula…
Bra009777	767.333	101.667	71.72	9.28333	-2.94966	9.38143e-18	2.07342e-15	yes	-	-	-	-
Bra009810	35	8.33333	2.61333	0.633333	-2.04485	0.000744135	0.0153305	yes	AT5G25050 (E=2e-242) | integral membrane transporter family protein	GO:0016020//membrane;GO:0005575//cellular_component	-	GO:0051179//localization;GO:0051234//establishment of localization;GO:0006810//transport;GO:0008150//biological_process
Bra009816	61.6667	6.66667	4.32	0.466667	-3.21057	7.9256e-06	0.000314786	yes	-	-	GO:0003674//molecular_function;GO:0003824//catalytic activity	GO:0008150//biological_process;GO:0008152//metabolic process
Bra009817	46.6667	0.333333	3.38	0.0233333	-7.17849	2.56021e-11	2.72717e-09	yes	AT5G25120 (E=2e-234) CYP71B11 | CYP71B11; electron carrier/ heme binding / iron ion binding / monooxygenase/ oxygen binding	-	GO:0003824//catalytic activity;GO:0005488//binding;GO:0003674//molecular_function	GO:0008152//metabolic process;GO:0008150//biological_process
Bra009830	604	188.333	21.3967	6.59667	-1.69758	1.9594e-08	1.35157e-06	yes	AT5G11110 (E=0.0) SPS1, ATSPS2F, KNS2 | ATSPS2F (SUCROSE PHOSPHATE SYNTHASE 2F); sucrose-phosphate synthase	-	GO:0016740//transferase activity;GO:0003824//catalytic activity;GO:0003674//molecular_function	GO:0071704//organic substance metabolic process;GO:0044238//primary metabolic process;GO:0008152//metabolic process;GO:0005975//carbohydrate metabolic process;GO:0009058//biosynthetic process;GO:0008150//biological_process;GO:0009987//cellular process
Bra009833	19.6667	1265.33	1.97667	125.903	5.9931	1.69528e-24	6.33078e-22	yes	AT5G25330 (E=2e-166) | unknown protein	GO:0005575//cellular_component;GO:0016020//membrane	GO:0003674//molecular_function;GO:0003824//catalytic activity;GO:0016740//transferase activity	-
Bra009842	53.6667	13.6667	7.4	1.89	-1.96914	0.000278787	0.00689832	yes	AT5G25470 (E=3e-083) | DNA binding	GO:0005634//nucleus;GO:0043229//intracellular organelle;GO:0043231//intracellular membrane-bounded organelle;GO:0005623//cell;GO:0044424//intracellular part;GO:0005575//cellular_component;GO:0043226//organelle;GO:0043227//membrane-bounded organelle;GO:0044464//cell part;GO:0005622//intracellular	GO:0097159//organic cyclic compound binding;GO:0005488//binding;GO:1901363//heterocyclic compound binding;GO:0003674//molecular_function;GO:0003677//DNA binding;GO:0003676//nucleic acid binding	GO:0009987//cellular process;GO:0071704//organic substance metabolic process;GO:0044237//cellular metabolic process;GO:0009058//biosynthetic process;GO:0006807//nitrogen compound metabolic process;GO:1901360//organic cyclic compound metabolic process;GO:0006725//cellular aromatic compound metabolic process;GO:0044238//primary metabolic process;GO:0034641//cellular nitrogen compound metabolic proc…
Bra009859	87.3333	31.6667	6.34667	2.32667	-1.44773	0.00202164	0.034014	yes	-	-	-	-
Bra009866	352.333	35.3333	22.18	2.26333	-3.29274	1.27382e-15	2.24919e-13	yes	AT5G25880 (E=0.0) ATNADP-ME3 | ATNADP-ME3 (NADP-malic enzyme 3); malate dehydrogenase (oxaloacetate-decarboxylating) (NADP+)/ malic enzyme/ oxidoreductase, acting on NADH or NADPH, NAD or NADP as acceptor	GO:0005829//cytosol;GO:0005575//cellular_component;GO:0044424//intracellular part;GO:0005737//cytoplasm;GO:0005622//intracellular;GO:0044444//cytoplasmic part;GO:0044464//cell part;GO:0005623//cell	GO:0097159//organic cyclic compound binding;GO:1901265//nucleoside phosphate binding;GO:0003824//catalytic activity;GO:0036094//small molecule binding;GO:0000166//nucleotide binding;GO:0003674//molecular_function;GO:0005488//binding;GO:1901363//heterocyclic compound binding	GO:0043170//macromolecule metabolic process;GO:0051704//multi-organism process;GO:0044238//primary metabolic process;GO:0044706//multi-multicellular organism process;GO:0071840//cellular component organization or biogenesis;GO:0009056//catabolic process;GO:0030154//cell differentiation;GO:0009653//anatomical structure morphogenesis;GO:0009058//biosynthetic process;GO:0019538//protein metabolic pr…
Bra009873	0.333333	13.3333	0.0266667	1.1	5.36632	0.00177944	0.0308003	yes	-	-	-	-
Bra009948	31	6.33333	1.22333	0.243333	-2.32981	0.00117039	0.0221719	yes	AT5G27680 (E=9e-168) RECQSIM | RECQSIM (Arabidopsis RecQ helicase sim); ATP binding / ATP-dependent helicase/ helicase/ nucleic acid binding	-	GO:0003676//nucleic acid binding;GO:1901265//nucleoside phosphate binding;GO:0097159//organic cyclic compound binding;GO:0000166//nucleotide binding;GO:0003824//catalytic activity;GO:0003674//molecular_function;GO:1901363//heterocyclic compound binding;GO:0005488//binding;GO:0036094//small molecule binding;GO:0016787//hydrolase activity	GO:1901360//organic cyclic compound metabolic process;GO:0007049//cell cycle;GO:0043170//macromolecule metabolic process;GO:0006725//cellular aromatic compound metabolic process;GO:0046483//heterocycle metabolic process;GO:0044237//cellular metabolic process;GO:0008152//metabolic process;GO:0006259//DNA metabolic process;GO:0044763//single-organism cellular process;GO:0006950//response to stress;…
Bra009959	48.58	0.336667	4.89667	0.0333333	-7.19869	2.65485e-06	0.000116717	yes	AT1G70580 (E=7e-082) AOAT2, GGT2 | AOAT2 (ALANINE-2-OXOGLUTARATE AMINOTRANSFERASE 2); L-alanine:2-oxoglutarate aminotransferase/ glycine:2-oxoglutarate aminotransferase	-	GO:0003824//catalytic activity;GO:0005488//binding;GO:0003674//molecular_function	GO:0008152//metabolic process;GO:0008150//biological_process
Bra009978	1456.67	622.667	100.19	42.7567	-1.22852	9.18746e-06	0.000359628	yes	-	-	-	-
Bra009992	49.3333	154	2.95	8.88667	1.59093	0.000217232	0.00565065	yes	AT5G28210 (E=2e-243) | mRNA capping enzyme family protein	GO:0005623//cell;GO:0043229//intracellular organelle;GO:0043226//organelle;GO:0044424//intracellular part;GO:0005634//nucleus;GO:0005622//intracellular;GO:0043231//intracellular membrane-bounded organelle;GO:0044464//cell part;GO:0043227//membrane-bounded organelle;GO:0005575//cellular_component	GO:0016787//hydrolase activity;GO:0003824//catalytic activity;GO:0016740//transferase activity;GO:0003674//molecular_function	GO:0044699//single-organism process;GO:0043412//macromolecule modification;GO:0046483//heterocycle metabolic process;GO:0006464//cellular protein modification process;GO:0044267//cellular protein metabolic process;GO:0019538//protein metabolic process;GO:0044238//primary metabolic process;GO:0044260//cellular macromolecule metabolic process;GO:0008150//biological_process;GO:0050789//regulation of…
Bra010074	7	57.6667	0.226667	1.82	3.00529	1.23151e-05	0.000468932	yes	AT5G62310 (E=0.0) IRE | IRE (INCOMPLETE ROOT HAIR ELONGATION); kinase/ protein serine/threonine kinase	-	GO:0097159//organic cyclic compound binding;GO:0036094//small molecule binding;GO:0003674//molecular_function;GO:0003824//catalytic activity;GO:0016772//transferase activity, transferring phosphorus-containing groups;GO:1901363//heterocyclic compound binding;GO:0000166//nucleotide binding;GO:0016301//kinase activity;GO:0016740//transferase activity;GO:1901265//nucleoside phosphate binding;GO:0005…	GO:0071840//cellular component organization or biogenesis;GO:0044767//single-organism developmental process;GO:0032502//developmental process;GO:0044260//cellular macromolecule metabolic process;GO:0022414//reproductive process;GO:0071704//organic substance metabolic process;GO:0032501//multicellular organismal process;GO:0009653//anatomical structure morphogenesis;GO:0000003//reproduction;GO:003…
Bra010130	71.6667	24.3333	16.4833	5.61333	-1.55408	0.00136351	0.024913	yes	-	-	-	-
Bra010178	1325	404.333	82.5933	24.9767	-1.72544	1.1393e-08	8.24381e-07	yes	AT1G32640 (E=5e-263) ATMYC2, RD22BP1, JAI1, JIN1, MYC2, ZBF1 | MYC2; DNA binding / transcription activator/ transcription factor	GO:0043231//intracellular membrane-bounded organelle;GO:0005575//cellular_component;GO:0005622//intracellular;GO:0043227//membrane-bounded organelle;GO:0044464//cell part;GO:0044424//intracellular part;GO:0043229//intracellular organelle;GO:0005623//cell;GO:0043226//organelle;GO:0005634//nucleus	GO:1901363//heterocyclic compound binding;GO:0097159//organic cyclic compound binding;GO:0003674//molecular_function;GO:0005488//binding;GO:0003677//DNA binding;GO:0001071//nucleic acid binding transcription factor activity;GO:0003700//transcription factor activity, sequence-specific DNA binding;GO:0003676//nucleic acid binding;GO:0005515//protein binding	GO:0008219//cell death;GO:0006950//response to stress;GO:0051179//localization;GO:0007154//cell communication;GO:0065007//biological regulation;GO:0006807//nitrogen compound metabolic process;GO:0050794//regulation of cellular process;GO:0006810//transport;GO:0051234//establishment of localization;GO:0044237//cellular metabolic process;GO:0009058//biosynthetic process;GO:0050896//response to stim…
Bra010193	145	348.333	8.42333	20.36	1.27327	0.000108344	0.00313444	yes	AT1G33060 (E=4e-228) ANAC014 | no apical meristem (NAM) family protein	GO:0043226//organelle;GO:0005623//cell;GO:0005575//cellular_component;GO:0005634//nucleus;GO:0043227//membrane-bounded organelle;GO:0043231//intracellular membrane-bounded organelle;GO:0044424//intracellular part;GO:0043229//intracellular organelle;GO:0044464//cell part;GO:0005622//intracellular	GO:0001071//nucleic acid binding transcription factor activity;GO:0003700//transcription factor activity, sequence-specific DNA binding;GO:0005488//binding;GO:1901363//heterocyclic compound binding;GO:0003674//molecular_function;GO:0097159//organic cyclic compound binding;GO:0003676//nucleic acid binding;GO:0003677//DNA binding	GO:0009607//response to biotic stimulus;GO:0008150//biological_process;GO:0044238//primary metabolic process;GO:0044237//cellular metabolic process;GO:0046483//heterocycle metabolic process;GO:0009058//biosynthetic process;GO:0009987//cellular process;GO:1901360//organic cyclic compound metabolic process;GO:0007275//multicellular organism development;GO:0044699//single-organism process;GO:0008152…
Bra010209	0.666667	14.6667	0.0533333	1.16667	4.45121	1.36229e-05	0.000512261	yes	AT1G33610 (E=3e-215) | protein binding	-	GO:0005488//binding;GO:0005515//protein binding;GO:0003674//molecular_function	-
Bra010281	371.667	89.3333	71.9867	17	-2.08219	5.51902e-09	4.22895e-07	yes	AT4G30590 (E=6e-056) | plastocyanin-like domain-containing protein	-	GO:0005488//binding;GO:0003674//molecular_function	-
Bra010299	21.3133	356.523	0.78	13.97	4.16271	0.000192651	0.00510526	yes	AT4G30190 (E=0.0) AHA2, PMA2 | AHA2; ATPase/ hydrogen-exporting ATPase, phosphorylative mechanism	GO:0016020//membrane;GO:0005575//cellular_component	GO:0005215//transporter activity;GO:0005488//binding;GO:0003824//catalytic activity;GO:0003674//molecular_function;GO:0016787//hydrolase activity;GO:1901265//nucleoside phosphate binding;GO:0036094//small molecule binding;GO:1901363//heterocyclic compound binding;GO:0097159//organic cyclic compound binding;GO:0000166//nucleotide binding	GO:1901360//organic cyclic compound metabolic process;GO:0006807//nitrogen compound metabolic process;GO:0009987//cellular process;GO:0051234//establishment of localization;GO:0009058//biosynthetic process;GO:0071704//organic substance metabolic process;GO:0006810//transport;GO:0006139//nucleobase-containing compound metabolic process;GO:0051179//localization;GO:0044237//cellular metabolic proces…
Bra010357	87	1	9.63667	0.113333	-6.40989	7.07095e-13	9.18912e-11	yes	-	-	-	-
Bra010446	885	14.3333	79.9833	1.33	-5.9102	1.15434e-17	2.50023e-15	yes	AT4G25870 (E=1e-190) | unknown protein	GO:0016020//membrane;GO:0005575//cellular_component	GO:0003824//catalytic activity;GO:0016740//transferase activity;GO:0003674//molecular_function	-
Bra010500	31.6667	222.667	1.47333	11.1	2.9134	1.29137e-07	7.64216e-06	yes	AT4G24190 (E=8e-191) SHD, HSP90.7 | SHD (SHEPHERD); ATP binding / unfolded protein binding	-	GO:1901265//nucleoside phosphate binding;GO:0036094//small molecule binding;GO:0000166//nucleotide binding;GO:0097159//organic cyclic compound binding;GO:0005515//protein binding;GO:0003674//molecular_function;GO:1901363//heterocyclic compound binding;GO:0005488//binding	GO:0009987//cellular process;GO:0006950//response to stress;GO:0008150//biological_process;GO:0050896//response to stimulus
Bra010535	114.333	6	13.0233	0.696667	-4.22449	9.87037e-07	4.84408e-05	yes	AT4G35420 (E=1e-102) | dihydroflavonol 4-reductase family / dihydrokaempferol 4-reductase family	GO:0043227//membrane-bounded organelle;GO:0005575//cellular_component;GO:0005783//endoplasmic reticulum;GO:0044424//intracellular part;GO:0043231//intracellular membrane-bounded organelle;GO:0044464//cell part;GO:0005622//intracellular;GO:0043226//organelle;GO:0012505//endomembrane system;GO:0005623//cell;GO:0043229//intracellular organelle;GO:0044444//cytoplasmic part;GO:0005737//cytoplasm	GO:0003674//molecular_function;GO:0003824//catalytic activity;GO:0005488//binding	GO:0032501//multicellular organismal process;GO:0009653//anatomical structure morphogenesis;GO:0032502//developmental process;GO:0000003//reproduction;GO:0016043//cellular component organization;GO:0007275//multicellular organism development;GO:0044699//single-organism process;GO:0071840//cellular component organization or biogenesis;GO:0009987//cellular process;GO:0044767//single-organism develo…
Bra010568	46.6667	140	4.22333	13.3767	1.66326	0.00152465	0.0273066	yes	AT4G36680 (E=1e-171) | pentatricopeptide (PPR) repeat-containing protein	GO:0044444//cytoplasmic part;GO:0043227//membrane-bounded organelle;GO:0043226//organelle;GO:0043229//intracellular organelle;GO:0044424//intracellular part;GO:0005622//intracellular;GO:0044464//cell part;GO:0005737//cytoplasm;GO:0043231//intracellular membrane-bounded organelle;GO:0005623//cell;GO:0005575//cellular_component;GO:0005739//mitochondrion	GO:0003674//molecular_function;GO:0005515//protein binding;GO:0005488//binding	GO:0051179//localization;GO:0008150//biological_process;GO:0016043//cellular component organization;GO:0009987//cellular process;GO:0006810//transport;GO:0051234//establishment of localization;GO:0071840//cellular component organization or biogenesis
Bra010592	3705	643	353.427	61.9533	-2.51216	3.20836e-08	2.13599e-06	yes	AT4G36880 (E=2e-186) CP1 | CP1 (CYSTEINE PROTEINASE1); cysteine-type endopeptidase/ cysteine-type peptidase	-	GO:0003824//catalytic activity;GO:0016787//hydrolase activity;GO:0003674//molecular_function	GO:0008152//metabolic process;GO:0008150//biological_process;GO:0019538//protein metabolic process;GO:0071704//organic substance metabolic process;GO:0043170//macromolecule metabolic process;GO:0044238//primary metabolic process
Bra010606	1.33333	33.6667	0.0966667	2.91	4.91186	4.30884e-05	0.0014169	yes	AT4G37650 (E=1e-224) SHR, SGR7 | SHR (SHORT ROOT); protein binding / sequence-specific DNA binding / transcription factor	GO:0043226//organelle;GO:0043231//intracellular membrane-bounded organelle;GO:0043229//intracellular organelle;GO:0005634//nucleus;GO:0005622//intracellular;GO:0044424//intracellular part;GO:0005575//cellular_component;GO:0043227//membrane-bounded organelle;GO:0005623//cell;GO:0044464//cell part	GO:1901363//heterocyclic compound binding;GO:0003676//nucleic acid binding;GO:0003674//molecular_function;GO:0003700//transcription factor activity, sequence-specific DNA binding;GO:0003677//DNA binding;GO:0005488//binding;GO:0097159//organic cyclic compound binding;GO:0001071//nucleic acid binding transcription factor activity	GO:0044237//cellular metabolic process;GO:0071704//organic substance metabolic process;GO:0044767//single-organism developmental process;GO:0032501//multicellular organismal process;GO:0044707//single-multicellular organism process;GO:0008150//biological_process;GO:0046483//heterocycle metabolic process;GO:0032502//developmental process;GO:1901360//organic cyclic compound metabolic process;GO:000…
Bra010636	1	9.66667	0.203333	1.90667	3.22913	0.00164768	0.0290144	yes	AT4G38100 (E=3e-064) | unknown protein	GO:0043227//membrane-bounded organelle;GO:0043231//intracellular membrane-bounded organelle;GO:0043229//intracellular organelle;GO:0005623//cell;GO:0009536//plastid;GO:0044444//cytoplasmic part;GO:0005737//cytoplasm;GO:0044424//intracellular part;GO:0016020//membrane;GO:0043226//organelle;GO:0005575//cellular_component;GO:0044464//cell part;GO:0009579//thylakoid;GO:0005622//intracellular	-	-
Bra010644	8.66667	55.6667	0.613333	3.85333	2.65136	0.000484302	0.0107992	yes	AT4G39950 (E=2e-283) CYP79B2 | CYP79B2; electron carrier/ heme binding / iron ion binding / monooxygenase/ oxygen binding	-	GO:0003824//catalytic activity;GO:0003674//molecular_function;GO:0005488//binding	GO:0008150//biological_process;GO:0008152//metabolic process
Bra010664	8.74667	0.73	1.54	0.123333	-3.6423	0.00171426	0.0299594	yes	AT4G13360 (E=1e-096) | catalytic	-	GO:0003674//molecular_function;GO:0016787//hydrolase activity;GO:0003824//catalytic activity	GO:0008150//biological_process;GO:0008152//metabolic process
Bra010671	105.667	255.333	4.38333	10.89	1.3129	0.000628385	0.0133697	yes	AT4G39660 (E=6e-249) AGT2 | AGT2 (ALANINE:GLYOXYLATE AMINOTRANSFERASE 2); alanine-glyoxylate transaminase/ catalytic/ pyridoxal phosphate binding / transaminase	-	GO:0016740//transferase activity;GO:0003674//molecular_function;GO:0003824//catalytic activity;GO:0005488//binding	GO:0008152//metabolic process;GO:0008150//biological_process
Bra010672	4069.33	808.667	284.813	54.75	-2.37909	3.11215e-09	2.47214e-07	yes	AT4G39640 (E=9e-223) GGT1 | GGT1 (GAMMA-GLUTAMYL TRANSPEPTIDASE 1); gamma-glutamyltransferase/ glutathione gamma-glutamylcysteinyltransferase	-	GO:0003824//catalytic activity;GO:0016740//transferase activity;GO:0003674//molecular_function	GO:0008150//biological_process;GO:0008152//metabolic process;GO:0009987//cellular process
Bra010717	259.58	620.817	24.4867	57.0667	1.22065	0.000975141	0.0191892	yes	AT4G38970 (E=3e-218) | fructose-bisphosphate aldolase, putative	-	GO:0003674//molecular_function;GO:0003824//catalytic activity	GO:0005975//carbohydrate metabolic process;GO:0046483//heterocycle metabolic process;GO:0071704//organic substance metabolic process;GO:0006139//nucleobase-containing compound metabolic process;GO:0008152//metabolic process;GO:0008150//biological_process;GO:0006091//generation of precursor metabolites and energy;GO:0009987//cellular process;GO:0034641//cellular nitrogen compound metabolic process…
Bra010724	2.33333	321.667	0.0966667	15.2033	7.29715	2.45163e-07	1.37329e-05	yes	AT1G73490 (E=1e-024) | RNA recognition motif (RRM)-containing protein	-	GO:0003674//molecular_function;GO:0003676//nucleic acid binding;GO:0000166//nucleotide binding;GO:1901265//nucleoside phosphate binding;GO:0016787//hydrolase activity;GO:0005488//binding;GO:1901363//heterocyclic compound binding;GO:0036094//small molecule binding;GO:0097159//organic cyclic compound binding;GO:0003824//catalytic activity	GO:0019538//protein metabolic process;GO:0008152//metabolic process;GO:0044238//primary metabolic process;GO:0071704//organic substance metabolic process;GO:0008150//biological_process;GO:0043170//macromolecule metabolic process
Bra010727	108	876	8.8	75.35	3.09803	1.21409e-07	7.25082e-06	yes	-	-	-	-
Bra010736	572	254.667	75.4	32.44	-1.21679	0.000277951	0.00688289	yes	AT4G38620 (E=1e-128) ATMYB4, MYB4 | MYB4; DNA binding / transcription factor	-	GO:0003682//chromatin binding;GO:1901363//heterocyclic compound binding;GO:0003674//molecular_function;GO:0044877//macromolecular complex binding;GO:0003676//nucleic acid binding;GO:0005488//binding;GO:0003677//DNA binding;GO:0097159//organic cyclic compound binding	GO:0050896//response to stimulus;GO:0008150//biological_process;GO:0006725//cellular aromatic compound metabolic process;GO:0044699//single-organism process;GO:0046483//heterocycle metabolic process;GO:0009058//biosynthetic process;GO:0019748//secondary metabolic process;GO:1901360//organic cyclic compound metabolic process;GO:0044238//primary metabolic process;GO:0071704//organic substance metab…
Bra010786	57	165	2.59333	7.78333	1.58558	0.000423977	0.00970271	yes	AT1G30240 (E=0.0) | unknown protein	-	GO:0003674//molecular_function;GO:0005488//binding	-
Bra010787	286.333	762	45.41	125.81	1.47016	0.00112023	0.0214595	yes	AT1G30230 (E=3e-091) | elongation factor 1-beta / EF-1-beta	GO:0044424//intracellular part;GO:0044464//cell part;GO:0005623//cell;GO:0005737//cytoplasm;GO:0005622//intracellular;GO:0005575//cellular_component	GO:0008135//translation factor activity, RNA binding;GO:0097159//organic cyclic compound binding;GO:0003674//molecular_function;GO:0005488//binding;GO:0003723//RNA binding;GO:1901363//heterocyclic compound binding;GO:0003676//nucleic acid binding	GO:0043604//amide biosynthetic process;GO:0034641//cellular nitrogen compound metabolic process;GO:1901564//organonitrogen compound metabolic process;GO:1901566//organonitrogen compound biosynthetic process;GO:0008152//metabolic process;GO:0044260//cellular macromolecule metabolic process;GO:0044249//cellular biosynthetic process;GO:0071704//organic substance metabolic process;GO:0034645//cellula…
Bra010793	24.3333	149.667	2.46333	16.0633	2.70509	3.9021e-05	0.0012976	yes	-	-	-	-
Bra010935	312.333	138.333	32.14	14.14	-1.18459	0.00109842	0.0211163	yes	-	-	-	-
Bra011046	994	2188.67	36.1167	79.4867	1.13805	0.000608156	0.0130332	yes	AT4G28650 (E=0.0) | leucine-rich repeat transmembrane protein kinase, putative	GO:0005575//cellular_component;GO:0016020//membrane	GO:0016772//transferase activity, transferring phosphorus-containing groups;GO:0005515//protein binding;GO:0003674//molecular_function;GO:1901363//heterocyclic compound binding;GO:0016740//transferase activity;GO:0036094//small molecule binding;GO:0005488//binding;GO:0016301//kinase activity;GO:1901265//nucleoside phosphate binding;GO:0097159//organic cyclic compound binding;GO:0003824//catalytic…	GO:0044267//cellular protein metabolic process;GO:0000003//reproduction;GO:0007165//signal transduction;GO:0007275//multicellular organism development;GO:0009790//embryo development;GO:0009605//response to external stimulus;GO:0044699//single-organism process;GO:0009607//response to biotic stimulus;GO:0003006//developmental process involved in reproduction;GO:0048367//shoot system development;GO:…
Bra011082	207	451	26.56	58.04	1.12779	0.000417449	0.00959838	yes	AT4G29080 (E=7e-082) PAP2, IAA27 | PAP2 (PHYTOCHROME-ASSOCIATED PROTEIN 2); transcription factor	GO:0005634//nucleus;GO:0043229//intracellular organelle;GO:0005622//intracellular;GO:0043227//membrane-bounded organelle;GO:0044424//intracellular part;GO:0043231//intracellular membrane-bounded organelle;GO:0044464//cell part;GO:0005623//cell;GO:0043226//organelle;GO:0005575//cellular_component	GO:0005515//protein binding;GO:0005488//binding;GO:0003674//molecular_function	GO:0034641//cellular nitrogen compound metabolic process;GO:0023052//signaling;GO:0009058//biosynthetic process;GO:0065007//biological regulation;GO:0007165//signal transduction;GO:1901360//organic cyclic compound metabolic process;GO:0044699//single-organism process;GO:0071704//organic substance metabolic process;GO:0044763//single-organism cellular process;GO:0007154//cell communication;GO:0006…
Bra011174	125.667	51.6667	6.82333	2.80667	-1.28162	0.00284625	0.0449765	yes	AT4G30210 (E=4e-310) ATR2, AR2 | ATR2 (ARABIDOPSIS P450 REDUCTASE 2); NADPH-hemoprotein reductase	-	GO:0097159//organic cyclic compound binding;GO:1901363//heterocyclic compound binding;GO:0036094//small molecule binding;GO:0003674//molecular_function;GO:1901265//nucleoside phosphate binding;GO:0000166//nucleotide binding;GO:0003824//catalytic activity;GO:0005488//binding	GO:0008150//biological_process;GO:0008152//metabolic process
Bra011271	25.6667	103.333	1.8	7.29	2.01792	1.95668e-05	0.000706016	yes	-	-	-	-
Bra011285	83	4.33333	3.13	0.15	-4.38313	3.3853e-11	3.57094e-09	yes	AT4G31610 (E=9e-084) REM1, ATREM1 | REM1 (REPRODUCTIVE MERISTEM 1); DNA binding / transcription factor	GO:0005623//cell;GO:0005634//nucleus;GO:0043227//membrane-bounded organelle;GO:0043229//intracellular organelle;GO:0044464//cell part;GO:0005622//intracellular;GO:0043231//intracellular membrane-bounded organelle;GO:0044424//intracellular part;GO:0005575//cellular_component;GO:0043226//organelle	GO:0003676//nucleic acid binding;GO:0003677//DNA binding;GO:1901363//heterocyclic compound binding;GO:0005488//binding;GO:0097159//organic cyclic compound binding;GO:0003674//molecular_function	GO:0071704//organic substance metabolic process;GO:0046483//heterocycle metabolic process;GO:0009058//biosynthetic process;GO:1901360//organic cyclic compound metabolic process;GO:0044237//cellular metabolic process;GO:0044238//primary metabolic process;GO:0008150//biological_process;GO:0006139//nucleobase-containing compound metabolic process;GO:0006725//cellular aromatic compound metabolic proc…
Bra011290	136	346	8.29	20.63	1.3153	0.000141664	0.00391564	yes	AT4G31670 (E=4e-263) UBP18 | UBP18 (UBIQUITIN-SPECIFIC PROTEASE 18); cysteine-type endopeptidase/ ubiquitin thiolesterase	-	GO:0003674//molecular_function;GO:0016787//hydrolase activity;GO:0003824//catalytic activity;GO:0005488//binding	GO:0043170//macromolecule metabolic process;GO:0036211//protein modification process;GO:0019538//protein metabolic process;GO:0008150//biological_process;GO:0009987//cellular process;GO:0009056//catabolic process;GO:0044237//cellular metabolic process;GO:0008152//metabolic process;GO:0044238//primary metabolic process;GO:0044260//cellular macromolecule metabolic process;GO:0044267//cellular prote…
Bra011299	291	76.6667	32.7967	8.48667	-1.95028	0.000894077	0.0178535	yes	AT4G31800 (E=2e-122) WRKY18, ATWRKY18 | WRKY18; transcription factor	-	GO:0003674//molecular_function;GO:0003700//transcription factor activity, sequence-specific DNA binding;GO:0001071//nucleic acid binding transcription factor activity;GO:0005488//binding;GO:0003676//nucleic acid binding;GO:1901363//heterocyclic compound binding;GO:0003677//DNA binding;GO:0097159//organic cyclic compound binding	GO:0006725//cellular aromatic compound metabolic process;GO:0071704//organic substance metabolic process;GO:0046483//heterocycle metabolic process;GO:0008152//metabolic process;GO:0006807//nitrogen compound metabolic process;GO:0009987//cellular process;GO:0044237//cellular metabolic process;GO:0008150//biological_process;GO:1901360//organic cyclic compound metabolic process;GO:0044238//primary m…
Bra011320	66.6667	155	3.40333	7.93333	1.22098	0.00165123	0.0290495	yes	AT2G25290 (E=2e-287) | binding	-	GO:0005488//binding;GO:0005515//protein binding;GO:0003674//molecular_function	-
Bra011341	446.667	149	42.23	13.7967	-1.61395	8.87519e-07	4.42249e-05	yes	AT4G32375 (E=1e-124) | glycoside hydrolase family 28 protein / polygalacturonase (pectinase) family protein	GO:0005575//cellular_component;GO:0005576//extracellular region	GO:0003674//molecular_function;GO:0003824//catalytic activity;GO:0016787//hydrolase activity	GO:0071704//organic substance metabolic process;GO:0005975//carbohydrate metabolic process;GO:0009987//cellular process;GO:0016043//cellular component organization;GO:0008152//metabolic process;GO:0044238//primary metabolic process;GO:0008150//biological_process;GO:0071840//cellular component organization or biogenesis
Bra011409	9	42.7867	0.696667	3.52	2.33703	0.000982194	0.019258	yes	-	-	-	-
Bra011491	36.9933	0.46	1.44667	0.02	-6.17659	9.70953e-11	9.5303e-09	yes	-	-	-	-
Bra011508	21.3333	77	1.03667	3.72	1.84335	0.000421886	0.00967301	yes	AT4G34220 (E=0.0) | leucine-rich repeat transmembrane protein kinase, putative	GO:0016020//membrane;GO:0005575//cellular_component	GO:0036094//small molecule binding;GO:1901265//nucleoside phosphate binding;GO:0003824//catalytic activity;GO:0003674//molecular_function;GO:1901363//heterocyclic compound binding;GO:0016772//transferase activity, transferring phosphorus-containing groups;GO:0005488//binding;GO:0097159//organic cyclic compound binding;GO:0000166//nucleotide binding;GO:0016301//kinase activity;GO:0016740//transfer…	GO:0044260//cellular macromolecule metabolic process;GO:0043170//macromolecule metabolic process;GO:0044267//cellular protein metabolic process;GO:0044237//cellular metabolic process;GO:0043412//macromolecule modification;GO:0006464//cellular protein modification process;GO:0019538//protein metabolic process;GO:0008152//metabolic process;GO:0008150//biological_process;GO:0009987//cellular process…
Bra011513	11.6667	0	0.936667	0.001	-9.87139	3.0268e-05	0.00104282	yes	AT4G34250 (E=5e-222) KCS16 | KCS16 (3-KETOACYL-COA SYNTHASE 16); acyltransferase/ catalytic/ transferase, transferring acyl groups other than amino-acyl groups	GO:0005575//cellular_component;GO:0016020//membrane	GO:0016740//transferase activity;GO:0003674//molecular_function;GO:0003824//catalytic activity	GO:0071704//organic substance metabolic process;GO:0008152//metabolic process;GO:0044238//primary metabolic process;GO:0009987//cellular process;GO:0044699//single-organism process;GO:0009058//biosynthetic process;GO:0008150//biological_process;GO:0044710//single-organism metabolic process;GO:0006629//lipid metabolic process
Bra011528	0	5	0.001	1.17667	10.2005	0.00256742	0.0411915	yes	AT3G52380 (E=1e-017) CP33, PDE322 | CP33; RNA binding	-	GO:1901363//heterocyclic compound binding;GO:0097159//organic cyclic compound binding;GO:0036094//small molecule binding;GO:0000166//nucleotide binding;GO:1901265//nucleoside phosphate binding;GO:0003674//molecular_function;GO:0005488//binding;GO:0003676//nucleic acid binding	-
Bra011552	33	8	4.49333	1.14667	-1.97034	0.00265766	0.0424716	yes	AT4G34680 (E=2e-100) | GATA transcription factor 3, putative (GATA-3)	GO:0005634//nucleus;GO:0043227//membrane-bounded organelle;GO:0043229//intracellular organelle;GO:0043226//organelle;GO:0044424//intracellular part;GO:0005623//cell;GO:0043231//intracellular membrane-bounded organelle;GO:0005575//cellular_component;GO:0005622//intracellular;GO:0044464//cell part	GO:0001071//nucleic acid binding transcription factor activity;GO:1901363//heterocyclic compound binding;GO:0003674//molecular_function;GO:0005488//binding;GO:0003700//transcription factor activity, sequence-specific DNA binding;GO:0003676//nucleic acid binding;GO:0003677//DNA binding;GO:0097159//organic cyclic compound binding	GO:0034641//cellular nitrogen compound metabolic process;GO:1901360//organic cyclic compound metabolic process;GO:0006139//nucleobase-containing compound metabolic process;GO:0044238//primary metabolic process;GO:0071704//organic substance metabolic process;GO:0008152//metabolic process;GO:0009058//biosynthetic process;GO:0044237//cellular metabolic process;GO:0008150//biological_process;GO:00099…
Bra011716	45.8333	2.55667	4.56	0.246667	-4.2084	5.004e-07	2.63097e-05	yes	-	-	-	-
Bra011735	742.333	296	98.2567	38.2167	-1.36235	5.46155e-05	0.00173791	yes	AT4G36990 (E=4e-093) HSF4, HSFB1, AT-HSFB1, ATHSF4 | HSF4 (HEAT SHOCK FACTOR 4); DNA binding / transcription factor/ transcription repressor	GO:0005634//nucleus;GO:0044464//cell part;GO:0005622//intracellular;GO:0043231//intracellular membrane-bounded organelle;GO:0043229//intracellular organelle;GO:0044424//intracellular part;GO:0005623//cell;GO:0005575//cellular_component;GO:0043227//membrane-bounded organelle;GO:0043226//organelle	GO:0003674//molecular_function;GO:0001071//nucleic acid binding transcription factor activity;GO:0003676//nucleic acid binding;GO:0003700//transcription factor activity, sequence-specific DNA binding;GO:0097159//organic cyclic compound binding;GO:0005488//binding;GO:0003677//DNA binding;GO:1901363//heterocyclic compound binding	GO:0009628//response to abiotic stimulus;GO:0071704//organic substance metabolic process;GO:0008150//biological_process;GO:0050896//response to stimulus;GO:0044237//cellular metabolic process;GO:1901360//organic cyclic compound metabolic process;GO:0046483//heterocycle metabolic process;GO:0006139//nucleobase-containing compound metabolic process;GO:0008152//metabolic process;GO:0006725//cellular…
Bra011772	43.6667	4.33333	6.85667	0.673333	-3.34811	1.22656e-07	7.31188e-06	yes	-	-	-	-
Bra011796	88.43	239.117	6.15667	16.9733	1.46305	0.000594036	0.0128	yes	AT4G37930 (E=1e-292) SHM1, STM, SHMT1 | SHM1 (SERINE TRANSHYDROXYMETHYLTRANSFERASE 1); glycine hydroxymethyltransferase/ poly(U) binding	-	GO:0003674//molecular_function;GO:0005488//binding;GO:0003824//catalytic activity;GO:0016740//transferase activity	GO:0008150//biological_process;GO:0008152//metabolic process;GO:0009987//cellular process
Bra011821	7	77.6667	0.53	5.61	3.40394	1.00983e-06	4.93361e-05	yes	AT4G39950 (E=1e-278) CYP79B2 | CYP79B2; electron carrier/ heme binding / iron ion binding / monooxygenase/ oxygen binding	-	GO:0005488//binding;GO:0003674//molecular_function;GO:0003824//catalytic activity	GO:0008152//metabolic process;GO:0008150//biological_process
Bra011881	34	97.6667	2.61667	7.4	1.4998	0.00290158	0.0457397	yes	AT4G39010 (E=3e-258) AtGH9B18 | AtGH9B18 (Arabidopsis thaliana glycosyl hydrolase 9B18); catalytic/ hydrolase, hydrolyzing O-glycosyl compounds	-	GO:0003824//catalytic activity;GO:0016787//hydrolase activity;GO:0003674//molecular_function	GO:0071704//organic substance metabolic process;GO:0009056//catabolic process;GO:0008150//biological_process;GO:0009987//cellular process;GO:0005975//carbohydrate metabolic process;GO:0008152//metabolic process;GO:0044238//primary metabolic process
Bra011907	1906.67	510.667	469.263	122.307	-1.93989	1.7861e-08	1.24525e-06	yes	AT1G55265 (E=9e-050) | unknown protein	GO:0044424//intracellular part;GO:0044464//cell part;GO:0005622//intracellular;GO:0043226//organelle;GO:0005773//vacuole;GO:0043229//intracellular organelle;GO:0043227//membrane-bounded organelle;GO:0044444//cytoplasmic part;GO:0005623//cell;GO:0005737//cytoplasm;GO:0005575//cellular_component;GO:0043231//intracellular membrane-bounded organelle	-	-
Bra011918	59.6667	151.667	6.58	16.92	1.36257	0.00252413	0.0405571	yes	AT1G55480 (E=6e-152) | binding / protein binding	GO:0005575//cellular_component;GO:0044464//cell part;GO:0043226//organelle;GO:0044424//intracellular part;GO:0043231//intracellular membrane-bounded organelle;GO:0016020//membrane;GO:0044444//cytoplasmic part;GO:0005737//cytoplasm;GO:0005622//intracellular;GO:0009536//plastid;GO:0009579//thylakoid;GO:0043229//intracellular organelle;GO:0005623//cell;GO:0043227//membrane-bounded organelle	GO:0005515//protein binding;GO:0003674//molecular_function;GO:0005488//binding	GO:0044710//single-organism metabolic process;GO:0050896//response to stimulus;GO:0044699//single-organism process;GO:0071704//organic substance metabolic process;GO:0015979//photosynthesis;GO:0044238//primary metabolic process;GO:0044237//cellular metabolic process;GO:0008152//metabolic process;GO:0008150//biological_process;GO:0006629//lipid metabolic process;GO:0009058//biosynthetic process;GO…
Bra011928	27.6667	1.66667	2.91333	0.193333	-3.91351	1.29708e-05	0.000491153	yes	AT2G28760 (E=1e-193) UXS6 | NAD-dependent epimerase/dehydratase family protein	-	GO:0003824//catalytic activity;GO:0005488//binding;GO:0003674//molecular_function	GO:0009987//cellular process;GO:0008152//metabolic process;GO:0008150//biological_process
Bra011946	1194.33	4071	51.32	177.273	1.78838	1.33016e-08	9.43573e-07	yes	AT2G28470 (E=0.0) BGAL8 | BGAL8 (beta-galactosidase 8); beta-galactosidase/ catalytic/ cation binding / sugar binding	-	GO:0030246//carbohydrate binding;GO:0003824//catalytic activity;GO:0016787//hydrolase activity;GO:0003674//molecular_function;GO:0005488//binding	GO:0008150//biological_process;GO:0005975//carbohydrate metabolic process;GO:0071704//organic substance metabolic process;GO:0008152//metabolic process;GO:0044238//primary metabolic process
Bra012022	368.667	152	84.83	34.57	-1.29505	0.000645809	0.0136511	yes	-	-	-	-
Bra012052	93	322	6.63	22.0867	1.73609	6.10558e-05	0.00190552	yes	AT2G26690 (E=5e-231) | nitrate transporter (NTP2)	GO:0005575//cellular_component;GO:0016020//membrane	GO:0003674//molecular_function;GO:0005215//transporter activity	GO:0008150//biological_process;GO:0044763//single-organism cellular process;GO:0019725//cellular homeostasis;GO:0065007//biological regulation;GO:0051179//localization;GO:0051234//establishment of localization;GO:0006810//transport;GO:0065008//regulation of biological quality;GO:0009987//cellular process;GO:0044699//single-organism process;GO:0042592//homeostatic process
Bra012074	328.333	920.67	10.6233	29.7167	1.48404	2.89627e-06	0.000126135	yes	AT3G47840 (E=1e-284) | pentatricopeptide (PPR) repeat-containing protein	-	GO:0003674//molecular_function;GO:0003824//catalytic activity;GO:0005515//protein binding;GO:0005488//binding;GO:0016787//hydrolase activity	GO:0008152//metabolic process;GO:0005975//carbohydrate metabolic process;GO:0044238//primary metabolic process;GO:0071704//organic substance metabolic process;GO:0008150//biological_process
Bra012112	154.667	28	17.1367	3.15667	-2.44061	3.29465e-07	1.81117e-05	yes	AT5G66870 (E=1e-112) ASL1, LBD36 | ASL1	-	-	GO:1901360//organic cyclic compound metabolic process;GO:0009987//cellular process;GO:0022414//reproductive process;GO:0003006//developmental process involved in reproduction;GO:0044707//single-multicellular organism process;GO:0061458//reproductive system development;GO:0032501//multicellular organismal process;GO:0044699//single-organism process;GO:0048856//anatomical structure development;GO:0…
Bra012141	495.667	213	27.04	11.57	-1.22471	0.000126081	0.0035282	yes	AT5G67200 (E=4e-298) | leucine-rich repeat transmembrane protein kinase, putative	GO:0005886//plasma membrane;GO:0005623//cell;GO:0016020//membrane;GO:0005575//cellular_component;GO:0071944//cell periphery;GO:0044464//cell part	GO:0000166//nucleotide binding;GO:0003674//molecular_function;GO:0097159//organic cyclic compound binding;GO:0003824//catalytic activity;GO:0005515//protein binding;GO:1901265//nucleoside phosphate binding;GO:0036094//small molecule binding;GO:0005488//binding;GO:0016772//transferase activity, transferring phosphorus-containing groups;GO:0016301//kinase activity;GO:1901363//heterocyclic compound …	GO:0032502//developmental process;GO:0009791//post-embryonic development;GO:0043412//macromolecule modification;GO:0010468//regulation of gene expression;GO:0060255//regulation of macromolecule metabolic process;GO:0009987//cellular process;GO:0071704//organic substance metabolic process;GO:0016043//cellular component organization;GO:0040029//regulation of gene expression, epigenetic;GO:0009653//…
Bra012143	332	35.6667	39.12	4.22333	-3.21145	4.79835e-12	5.62793e-10	yes	AT5G67210 (E=3e-152) | unknown protein	GO:0005622//intracellular;GO:0044464//cell part;GO:0044444//cytoplasmic part;GO:0043227//membrane-bounded organelle;GO:0012505//endomembrane system;GO:0005737//cytoplasm;GO:0044424//intracellular part;GO:0005575//cellular_component;GO:0043229//intracellular organelle;GO:0005623//cell;GO:0043231//intracellular membrane-bounded organelle;GO:0005794//Golgi apparatus;GO:0043226//organelle	-	GO:0008150//biological_process;GO:0044238//primary metabolic process;GO:0005975//carbohydrate metabolic process;GO:0008152//metabolic process;GO:0009987//cellular process;GO:0009058//biosynthetic process;GO:0071704//organic substance metabolic process
Bra012152	5	0	0.356667	0.001	-8.47843	0.00214288	0.0356187	yes	AT5G67310 (E=4e-182) CYP81G1 | CYP81G1; electron carrier/ heme binding / iron ion binding / monooxygenase/ oxygen binding	-	GO:0003824//catalytic activity;GO:0003674//molecular_function;GO:0005488//binding	GO:0008150//biological_process;GO:0008152//metabolic process
Bra012161	45.8333	2.55667	4.56	0.246667	-4.2084	5.00458e-07	2.63097e-05	yes	-	-	-	-
Bra012179	1276.67	377.667	113.997	33.42	-1.77021	3.38069e-06	0.00014471	yes	-	-	-	-
Bra012198	510.333	15	34.5633	1.05333	-5.03621	3.54997e-11	3.73253e-09	yes	AT1G19940 (E=1e-249) AtGH9B5 | AtGH9B5 (Arabidopsis thaliana Glycosyl Hydrolase 9B5); catalytic/ hydrolase, hydrolyzing O-glycosyl compounds	-	GO:0016787//hydrolase activity;GO:0003674//molecular_function;GO:0003824//catalytic activity	GO:0008152//metabolic process;GO:0044238//primary metabolic process;GO:0008150//biological_process;GO:0071704//organic substance metabolic process;GO:0005975//carbohydrate metabolic process;GO:0009056//catabolic process;GO:0009987//cellular process
Bra012237	435.667	98.3333	44.2033	10.1633	-2.12078	0.000625229	0.0133201	yes	AT1G76340 (E=3e-142) | integral membrane family protein	GO:0016020//membrane;GO:0005737//cytoplasm;GO:0044424//intracellular part;GO:0005622//intracellular;GO:0044464//cell part;GO:0043226//organelle;GO:0044444//cytoplasmic part;GO:0043231//intracellular membrane-bounded organelle;GO:0012505//endomembrane system;GO:0043227//membrane-bounded organelle;GO:0043229//intracellular organelle;GO:0005794//Golgi apparatus;GO:0005623//cell;GO:0005575//cellular_…	-	GO:0008150//biological_process;GO:0051179//localization;GO:0009987//cellular process;GO:0051234//establishment of localization;GO:0006810//transport
Bra012238	11974.3	23539.7	877.907	1763.94	1.00666	0.0022861	0.0374927	yes	AT1G20620 (E=1e-299) CAT3, SEN2, ATCAT3 | CAT3 (CATALASE 3); catalase	-	GO:0003674//molecular_function;GO:0003824//catalytic activity;GO:0005488//binding	GO:0008152//metabolic process;GO:0050896//response to stimulus;GO:0006950//response to stress;GO:0008150//biological_process
Bra012274	37.08	9.06667	4.15333	1.04667	-1.98847	0.00191376	0.0326467	yes	-	-	GO:0005198//structural molecule activity;GO:0003674//molecular_function	GO:0016043//cellular component organization;GO:0009987//cellular process;GO:0071840//cellular component organization or biogenesis;GO:0008150//biological_process
Bra012363	0.666667	12.3333	0.146667	2.90333	4.3071	6.14946e-05	0.00191553	yes	AT1G23130 (E=2e-054) | Bet v I allergen family protein	-	-	GO:0009607//response to biotic stimulus;GO:0050896//response to stimulus;GO:0008150//biological_process;GO:0006950//response to stress
Bra012385	27	7.66667	11.7333	3.19667	-1.87597	0.00237489	0.0386369	yes	-	-	-	-
Bra012439	157	929.667	25.95	156.343	2.59091	1.12714e-14	1.76055e-12	yes	AT1G26820 (E=3e-128) RNS3 | RNS3 (RIBONUCLEASE 3); RNA binding / endoribonuclease/ ribonuclease T2	-	GO:0005488//binding;GO:0003674//molecular_function;GO:1901363//heterocyclic compound binding;GO:0016787//hydrolase activity;GO:0003723//RNA binding;GO:0097159//organic cyclic compound binding;GO:0004518//nuclease activity;GO:0003824//catalytic activity;GO:0003676//nucleic acid binding;GO:0016788//hydrolase activity, acting on ester bonds	-
Bra012479	17	3	2.20667	0.38	-2.5378	0.00134392	0.0246821	yes	AT1G25400 (E=8e-086) | unknown protein	-	-	GO:0009987//cellular process;GO:0006810//transport;GO:0016043//cellular component organization;GO:0050896//response to stimulus;GO:0008219//cell death;GO:0071840//cellular component organization or biogenesis;GO:0050794//regulation of cellular process;GO:0050789//regulation of biological process;GO:0044699//single-organism process;GO:0044763//single-organism cellular process;GO:0007154//cell comm…
Bra012486	628.667	250.667	52.4733	21.18	-1.30888	2.29522e-05	0.000815859	yes	AT1G25280 (E=2e-211) AtTLP10 | AtTLP10 (TUBBY LIKE PROTEIN 10); phosphoric diester hydrolase/ transcription factor	-	GO:0003674//molecular_function;GO:0005515//protein binding;GO:0005488//binding	-
Bra012494	1462	616.333	233.597	96.7133	-1.27223	0.00133199	0.0245045	yes	AT1G24735 (E=1e-105) | O-methyltransferase	-	GO:0003674//molecular_function;GO:0003824//catalytic activity;GO:0016740//transferase activity	-
Bra012510	95	29.3333	14.95	4.62	-1.69418	0.00116893	0.0221572	yes	AT1G24480 (E=4e-114) | methyltransferase	-	GO:0003824//catalytic activity;GO:0003674//molecular_function;GO:0016740//transferase activity	GO:0008152//metabolic process;GO:0008150//biological_process
Bra012524	0	93.3333	0.001	9.03333	13.141	2.68408e-11	2.84977e-09	yes	-	-	-	-
Bra012536	0	31	0.001	3.18333	11.6363	4.73002e-10	4.1873e-08	yes	AT4G19670 (E=2e-070) | zinc finger (C3HC4-type RING finger) family protein	-	GO:0016740//transferase activity;GO:0003824//catalytic activity;GO:0003674//molecular_function;GO:0005488//binding;GO:0005515//protein binding	GO:0009987//cellular process;GO:0019538//protein metabolic process;GO:0008152//metabolic process;GO:0036211//protein modification process;GO:0071704//organic substance metabolic process;GO:0043170//macromolecule metabolic process;GO:0044237//cellular metabolic process;GO:0043412//macromolecule modification;GO:0044267//cellular protein metabolic process;GO:0008150//biological_process;GO:0006464//c…
Bra012540	0	226.333	0.001	6.46	12.6573	6.90429e-29	3.45098e-26	yes	AT4G19500 (E=1e-217) | ATP binding / nucleoside-triphosphatase/ nucleotide binding / protein binding / transmembrane receptor	GO:0005634//nucleus;GO:0044424//intracellular part;GO:0043226//organelle;GO:0043227//membrane-bounded organelle;GO:0043229//intracellular organelle;GO:0044464//cell part;GO:0005622//intracellular;GO:0005623//cell;GO:0005575//cellular_component;GO:0043231//intracellular membrane-bounded organelle	GO:0003677//DNA binding;GO:0003674//molecular_function;GO:1901265//nucleoside phosphate binding;GO:0005488//binding;GO:0000166//nucleotide binding;GO:0003676//nucleic acid binding;GO:0097159//organic cyclic compound binding;GO:0005515//protein binding;GO:0036094//small molecule binding;GO:1901363//heterocyclic compound binding	GO:0006725//cellular aromatic compound metabolic process;GO:0044699//single-organism process;GO:0008152//metabolic process;GO:0065007//biological regulation;GO:0071704//organic substance metabolic process;GO:0008150//biological_process;GO:0023052//signaling;GO:0044763//single-organism cellular process;GO:0009058//biosynthetic process;GO:0006139//nucleobase-containing compound metabolic process;GO…
Bra012553	455.917	118.667	27.66	7.36	-1.91002	1.13434e-07	6.82476e-06	yes	AT4G19210 (E=0.0) ATRLI2, RLI2 | ATRLI2; transporter	-	GO:0036094//small molecule binding;GO:1901363//heterocyclic compound binding;GO:0003674//molecular_function;GO:1901265//nucleoside phosphate binding;GO:0005488//binding;GO:0016787//hydrolase activity;GO:0003824//catalytic activity;GO:0000166//nucleotide binding;GO:0097159//organic cyclic compound binding	-
Bra012563	35.3333	110.333	3.71667	11.6333	1.64618	0.00136295	0.024913	yes	AT4G18970 (E=1e-190) | GDSL-motif lipase/hydrolase family protein	-	GO:0003824//catalytic activity;GO:0016787//hydrolase activity;GO:0003674//molecular_function	GO:0044710//single-organism metabolic process;GO:0008152//metabolic process;GO:0044699//single-organism process;GO:0044238//primary metabolic process;GO:0006629//lipid metabolic process;GO:0008150//biological_process;GO:0071704//organic substance metabolic process
Bra012564	77	11	10.8367	1.57333	-2.78402	0.000133627	0.00372333	yes	AT4G18960 (E=1e-110) AG | AG (AGAMOUS); DNA binding / transcription factor	GO:0005623//cell;GO:0005634//nucleus;GO:0044464//cell part;GO:0043229//intracellular organelle;GO:0043231//intracellular membrane-bounded organelle;GO:0005622//intracellular;GO:0043226//organelle;GO:0005575//cellular_component;GO:0043227//membrane-bounded organelle;GO:0044424//intracellular part	GO:0005488//binding;GO:0001071//nucleic acid binding transcription factor activity;GO:0003677//DNA binding;GO:0005515//protein binding;GO:0003674//molecular_function;GO:0003700//transcription factor activity, sequence-specific DNA binding;GO:0003676//nucleic acid binding;GO:1901363//heterocyclic compound binding;GO:0097159//organic cyclic compound binding	GO:0046483//heterocycle metabolic process;GO:1901360//organic cyclic compound metabolic process;GO:0044237//cellular metabolic process;GO:0009058//biosynthetic process;GO:0006139//nucleobase-containing compound metabolic process;GO:0044238//primary metabolic process;GO:0071704//organic substance metabolic process;GO:0006807//nitrogen compound metabolic process;GO:0008150//biological_process;GO:00…
Bra012567	234.667	101	29.2	12.5467	-1.21866	0.00085629	0.0171728	yes	AT4G18910 (E=7e-149) NIP1;2, NLM2 | NIP1;2 (NOD26-LIKE INTRINSIC PROTEIN 1;2); arsenite transmembrane transporter/ water channel	GO:0005575//cellular_component;GO:0016020//membrane	GO:0003674//molecular_function;GO:0005215//transporter activity	GO:0006810//transport;GO:0008150//biological_process;GO:0051234//establishment of localization;GO:0051179//localization
Bra012572	13.6667	0.333333	2.22	0.0466667	-5.57202	1.00203e-05	0.000388398	yes	AT3G62850 (E=2e-060) | zinc finger protein-related	GO:0005737//cytoplasm;GO:0005777//peroxisome;GO:0043227//membrane-bounded organelle;GO:0042579//microbody;GO:0044464//cell part;GO:0044444//cytoplasmic part;GO:0043229//intracellular organelle;GO:0044424//intracellular part;GO:0005623//cell;GO:0043231//intracellular membrane-bounded organelle;GO:0043226//organelle;GO:0005575//cellular_component;GO:0005622//intracellular	-	GO:0008152//metabolic process;GO:0008150//biological_process
Bra012589	20	3.66667	3.37333	0.636667	-2.40556	0.000614887	0.0131444	yes	-	-	-	-
Bra012619	18.3333	265.667	3.13	47.1233	3.91221	2.2833e-14	3.43435e-12	yes	-	-	-	-
Bra012621	12.6667	65.6667	0.376667	1.93333	2.35973	1.27951e-05	0.000485063	yes	AT5G46540 (E=0.0) PGP7 | PGP7 (P-GLYCOPROTEIN 7); ATPase, coupled to transmembrane movement of substances	GO:0016020//membrane;GO:0005575//cellular_component	GO:0000166//nucleotide binding;GO:1901363//heterocyclic compound binding;GO:0005215//transporter activity;GO:0036094//small molecule binding;GO:0005488//binding;GO:0003824//catalytic activity;GO:1901265//nucleoside phosphate binding;GO:0016787//hydrolase activity;GO:0097159//organic cyclic compound binding;GO:0003674//molecular_function	GO:0051234//establishment of localization;GO:0051179//localization;GO:0008150//biological_process;GO:0006810//transport;GO:0009987//cellular process
Bra012636	436.667	164.333	41.3733	15.4233	-1.42359	5.06553e-05	0.0016343	yes	AT4G17840 (E=1e-135) | unknown protein	GO:0016020//membrane;GO:0005575//cellular_component	-	-
Bra012637	22.3333	711.333	1.88667	60.08	4.99297	5.39841e-38	4.74025e-35	yes	AT4G17830 (E=7e-228) | peptidase M20/M25/M40 family protein	-	GO:0003674//molecular_function;GO:0016787//hydrolase activity;GO:0003824//catalytic activity	GO:0008150//biological_process;GO:0008152//metabolic process
Bra012668	343.333	132.667	34.8033	13.5467	-1.36129	5.2204e-05	0.00166998	yes	AT4G17370 (E=3e-193) | oxidoreductase family protein	-	GO:0003824//catalytic activity;GO:0003674//molecular_function	GO:0008152//metabolic process;GO:0008150//biological_process
Bra012688	0	89	0.001	2.26333	11.1442	1.7286e-14	2.62432e-12	yes	AT4G16890 (E=8e-304) SNC1, BAL | SNC1 (SUPPRESSOR OF NPR1-1, CONSTITUTIVE 1); nucleotide binding	-	GO:0005488//binding;GO:0005515//protein binding;GO:1901363//heterocyclic compound binding;GO:0000166//nucleotide binding;GO:0097159//organic cyclic compound binding;GO:0003674//molecular_function;GO:0036094//small molecule binding;GO:1901265//nucleoside phosphate binding	GO:0007165//signal transduction;GO:0044700//single organism signaling;GO:0050896//response to stimulus;GO:0051716//cellular response to stimulus;GO:0050794//regulation of cellular process;GO:0023052//signaling;GO:0009987//cellular process;GO:0065007//biological regulation;GO:0008150//biological_process;GO:0044699//single-organism process;GO:0007154//cell communication;GO:0044763//single-organism …
Bra012689	0	30	0.001	0.843333	9.71996	2.08517e-09	1.72214e-07	yes	AT5G51630 (E=2e-307) | disease resistance protein (TIR-NBS-LRR class), putative	-	GO:0005515//protein binding;GO:1901265//nucleoside phosphate binding;GO:0000166//nucleotide binding;GO:1901363//heterocyclic compound binding;GO:0097159//organic cyclic compound binding;GO:0003674//molecular_function;GO:0036094//small molecule binding;GO:0005488//binding	GO:0044700//single organism signaling;GO:0044763//single-organism cellular process;GO:0044699//single-organism process;GO:0007165//signal transduction;GO:0050789//regulation of biological process;GO:0009987//cellular process;GO:0008150//biological_process;GO:0050794//regulation of cellular process;GO:0007154//cell communication;GO:0023052//signaling;GO:0051716//cellular response to stimulus;GO:00…
Bra012700	2.33333	14.3333	0.23	1.45667	2.66297	0.00188138	0.0322045	yes	AT4G16620 (E=2e-149) | integral membrane family protein / nodulin MtN21-related	GO:0016020//membrane;GO:0005575//cellular_component	GO:0005215//transporter activity;GO:0003674//molecular_function	GO:0051234//establishment of localization;GO:0051179//localization;GO:0006810//transport;GO:0009987//cellular process;GO:0008150//biological_process
Bra012724	160.333	25.3333	24.8833	3.86	-2.68851	1.32016e-08	9.38526e-07	yes	AT4G16380 (E=1e-017) | metal ion binding	-	GO:0003674//molecular_function;GO:0005488//binding	GO:0051179//localization;GO:0008150//biological_process;GO:0006810//transport;GO:0051234//establishment of localization
Bra012733	280.333	109.333	28.26	10.6233	-1.41152	0.000826945	0.016677	yes	AT4G16190 (E=2e-177) | cysteine proteinase, putative	-	GO:0003674//molecular_function;GO:0016787//hydrolase activity;GO:0003824//catalytic activity	GO:0071704//organic substance metabolic process;GO:0008152//metabolic process;GO:0008150//biological_process;GO:0043170//macromolecule metabolic process;GO:0019538//protein metabolic process;GO:0044238//primary metabolic process
Bra012759	317.667	0	76.0033	0.001	-16.2138	5.56517e-42	6.0269e-39	yes	-	-	-	-
Bra012764	85.6667	4	29.0067	1.32	-4.45777	2.31899e-11	2.49475e-09	yes	AT4G15800 (E=1e-043) RALFL33 | RALFL33 (ralf-like 33); signal transducer	GO:0005623//cell;GO:0005576//extracellular region;GO:0030312//external encapsulating structure;GO:0044464//cell part;GO:0071944//cell periphery;GO:0005575//cellular_component;GO:0005618//cell wall	GO:0003674//molecular_function;GO:0004871//signal transducer activity	GO:0051716//cellular response to stimulus;GO:0044763//single-organism cellular process;GO:0050794//regulation of cellular process;GO:0008150//biological_process;GO:0023052//signaling;GO:0044700//single organism signaling;GO:0050896//response to stimulus;GO:0044699//single-organism process;GO:0007165//signal transduction;GO:0007154//cell communication;GO:0009987//cellular process;GO:0050789//regul…
Bra012767	52	15	4.93333	1.4	-1.81714	0.00187689	0.0321785	yes	AT4G15760 (E=2e-190) MO1 | MO1 (MONOOXYGENASE 1); electron carrier/ oxidoreductase	GO:0012505//endomembrane system;GO:0043226//organelle;GO:0005737//cytoplasm;GO:0044464//cell part;GO:0043229//intracellular organelle;GO:0044424//intracellular part;GO:0005623//cell;GO:0005575//cellular_component;GO:0005622//intracellular;GO:0043227//membrane-bounded organelle;GO:0044444//cytoplasmic part;GO:0005783//endoplasmic reticulum;GO:0043231//intracellular membrane-bounded organelle	GO:1901363//heterocyclic compound binding;GO:0036094//small molecule binding;GO:0097159//organic cyclic compound binding;GO:0003824//catalytic activity;GO:1901265//nucleoside phosphate binding;GO:0003674//molecular_function;GO:0000166//nucleotide binding;GO:0005488//binding	GO:0008150//biological_process;GO:0008152//metabolic process
Bra012768	256	46.3333	45.5867	8.13	-2.48728	6.0539e-10	5.31581e-08	yes	AT3G16510 (E=7e-040) | C2 domain-containing protein	-	GO:0005488//binding;GO:0005515//protein binding;GO:0003674//molecular_function	-
Bra012780	21.6667	79	1.37	5.24	1.93539	0.00065586	0.0138096	yes	AT4G15550 (E=4e-153) IAGLU | IAGLU (INDOLE-3-ACETATE BETA-D-GLUCOSYLTRANSFERASE); UDP-glycosyltransferase/ transferase, transferring glycosyl groups	-	GO:0016740//transferase activity;GO:0003674//molecular_function;GO:0003824//catalytic activity	GO:0008150//biological_process;GO:0008152//metabolic process
Bra012781	138.333	300.333	5.77	12.9233	1.16334	0.00156261	0.0278179	yes	AT4G15530 (E=0.0) PPDK | PPDK (pyruvate orthophosphate dikinase); kinase/ pyruvate, phosphate dikinase	-	GO:0000166//nucleotide binding;GO:0005488//binding;GO:0097159//organic cyclic compound binding;GO:0003824//catalytic activity;GO:0016772//transferase activity, transferring phosphorus-containing groups;GO:0016301//kinase activity;GO:0036094//small molecule binding;GO:1901265//nucleoside phosphate binding;GO:0003674//molecular_function;GO:0016740//transferase activity;GO:1901363//heterocyclic comp…	GO:0008150//biological_process;GO:0008152//metabolic process;GO:0009987//cellular process
Bra012784	66	18.6667	4.93	1.47	-1.74577	0.00242164	0.0392402	yes	AT4G15480 (E=4e-246) UGT84A1 | UGT84A1; UDP-glycosyltransferase/ sinapate 1-glucosyltransferase/ transferase, transferring glycosyl groups	-	GO:0003824//catalytic activity;GO:0003674//molecular_function;GO:0016740//transferase activity	GO:0009628//response to abiotic stimulus;GO:0009058//biosynthetic process;GO:0050896//response to stimulus;GO:0008150//biological_process;GO:0008152//metabolic process
Bra012786	1842.33	342	262.923	49.1733	-2.41869	1.69302e-15	2.95722e-13	yes	AT4G15470 (E=3e-130) | EXPRESSED IN: 24 plant structures; EXPRESSED DURING: 15 growth stages; CONTAINS InterPro DOMAIN/s: Uncharacterised protein family UPF0005 (InterPro:IPR006214); BEST Arabidopsis thaliana protein match is: glutamate binding (TAIR:AT1G03070.1); Has 4000 Blast hits to 3999 proteins in 955 species: Archae - 0; Bacteria - 1775; Metazoa - 750; Fungi - 92; Plants - 143; Viruses - 7…	GO:0005575//cellular_component;GO:0016020//membrane	-	-
Bra012789	0	18.6667	0.001	2.35	11.1984	1.16186e-07	6.97412e-06	yes	AT4G15417 (E=2e-084) ATRTL1 | ATRTL1 (ARABIDOPSIS THALIANA RNASEIII-LIKE 1); RNA binding / ribonuclease III	-	GO:0016787//hydrolase activity;GO:0097159//organic cyclic compound binding;GO:0005488//binding;GO:1901363//heterocyclic compound binding;GO:0016788//hydrolase activity, acting on ester bonds;GO:0003824//catalytic activity;GO:0004518//nuclease activity;GO:0003676//nucleic acid binding;GO:0003674//molecular_function;GO:0003723//RNA binding	GO:0008152//metabolic process;GO:0008150//biological_process;GO:0006725//cellular aromatic compound metabolic process;GO:1901360//organic cyclic compound metabolic process;GO:0044238//primary metabolic process;GO:0006807//nitrogen compound metabolic process;GO:0006139//nucleobase-containing compound metabolic process;GO:0034641//cellular nitrogen compound metabolic process;GO:0046483//heterocycle…
Bra012791	467.667	214.333	41.72	18.8633	-1.14515	0.000613505	0.0131306	yes	AT4G15410 (E=1e-143) PUX5 | PUX5 (Arabidopsis thaliana serine/threonine protein phosphatase 2A 55 kDa regulatory subunit B prime gamma); protein binding	-	GO:0003674//molecular_function;GO:0005515//protein binding;GO:0005488//binding	-
Bra012831	0.666667	469.667	0.0333333	26.1667	9.61655	6.28887e-49	9.72948e-46	yes	AT3G51895 (E=0.0) SULTR3;1, AST12 | SULTR3;1 (SULFATE TRANSPORTER 3;1); secondary active sulfate transmembrane transporter/ sulfate transmembrane transporter/ transporter	GO:0016020//membrane;GO:0005622//intracellular;GO:0005575//cellular_component;GO:0043231//intracellular membrane-bounded organelle;GO:0005737//cytoplasm;GO:0009536//plastid;GO:0044464//cell part;GO:0005623//cell;GO:0044424//intracellular part;GO:0043229//intracellular organelle;GO:0043227//membrane-bounded organelle;GO:0043226//organelle;GO:0044444//cytoplasmic part	GO:0003674//molecular_function;GO:0005215//transporter activity	GO:0051179//localization;GO:0009987//cellular process;GO:0006810//transport;GO:0051234//establishment of localization;GO:0008150//biological_process
Bra012838	95.3333	346.667	3.81333	14	1.8763	6.27322e-08	3.97291e-06	yes	AT3G51770 (E=0.0) ETO1 | ETO1 (ETHYLENE OVERPRODUCER 1); protein binding, bridging	-	GO:0005488//binding;GO:0005515//protein binding;GO:0003674//molecular_function	-
Bra012849	421	201.333	40.1533	18.9833	-1.08079	0.000464218	0.0104229	yes	-	-	-	-
Bra012850	795.333	287.667	33.7867	11.9867	-1.49502	6.38411e-07	3.28186e-05	yes	AT3G51550 (E=0.0) FER | FER (FERONIA); kinase/ protein kinase	-	GO:0016301//kinase activity;GO:0000166//nucleotide binding;GO:0036094//small molecule binding;GO:0016740//transferase activity;GO:1901265//nucleoside phosphate binding;GO:0003824//catalytic activity;GO:0003674//molecular_function;GO:0097159//organic cyclic compound binding;GO:1901363//heterocyclic compound binding;GO:0005488//binding;GO:0016772//transferase activity, transferring phosphorus-conta…	GO:0071704//organic substance metabolic process;GO:0019538//protein metabolic process;GO:0044267//cellular protein metabolic process;GO:0044237//cellular metabolic process;GO:0036211//protein modification process;GO:0008152//metabolic process;GO:0006464//cellular protein modification process;GO:0008150//biological_process;GO:0044238//primary metabolic process;GO:0044260//cellular macromolecule me…
Bra012857	2.02333	23.5733	0.166667	2	3.58496	5.23076e-05	0.00167101	yes	AT3G51330 (E=8e-102) | aspartyl protease family protein	-	GO:0003824//catalytic activity;GO:0003674//molecular_function;GO:0016787//hydrolase activity	GO:0071704//organic substance metabolic process;GO:0044238//primary metabolic process;GO:0043170//macromolecule metabolic process;GO:0019538//protein metabolic process;GO:0008150//biological_process;GO:0008152//metabolic process
Bra012858	1	17.6667	0.176667	3.26667	4.20872	6.46903e-06	0.000263044	yes	AT3G51300 (E=1e-097) ARAC11, ROP1, ROP1AT, ATRAC11, ATROP1 | ROP1 (RHO-RELATED PROTEIN FROM PLANTS 1); GTP binding / GTPase activating protein binding / GTPase/ protein binding	GO:0016020//membrane;GO:0005575//cellular_component;GO:0005623//cell;GO:0044464//cell part;GO:0005622//intracellular	GO:0003674//molecular_function;GO:0000166//nucleotide binding;GO:0097159//organic cyclic compound binding;GO:0005488//binding;GO:0036094//small molecule binding;GO:1901363//heterocyclic compound binding;GO:1901265//nucleoside phosphate binding	GO:0044700//single organism signaling;GO:0007165//signal transduction;GO:0050789//regulation of biological process;GO:0008150//biological_process;GO:0023052//signaling;GO:0051716//cellular response to stimulus;GO:0044763//single-organism cellular process;GO:0050794//regulation of cellular process;GO:0009987//cellular process;GO:0050896//response to stimulus;GO:0007154//cell communication;GO:00650…
Bra012863	81	0	14.61	0.001	-13.8347	5.56969e-13	7.29652e-11	yes	-	-	-	-
Bra012889	446.333	159.667	81.8267	29.2267	-1.48529	2.18843e-05	0.000779603	yes	AT3G50770 (E=3e-076) | calmodulin-related protein, putative	-	GO:0003674//molecular_function;GO:0005488//binding	GO:0051179//localization;GO:0008150//biological_process;GO:0051234//establishment of localization;GO:0006810//transport
Bra012892	41	5	3.20333	0.39	-3.03803	1.50428e-05	0.000561754	yes	AT3G50740 (E=7e-237) UGT72E1 | UGT72E1 (UDP-glucosyl transferase 72E1); UDP-glycosyltransferase/ coniferyl-alcohol glucosyltransferase/ transferase, transferring glycosyl groups	-	GO:0003674//molecular_function;GO:0003824//catalytic activity;GO:0016740//transferase activity	GO:0008150//biological_process;GO:0008152//metabolic process
Bra012922	205.333	68.6667	21.4633	7.00333	-1.61576	0.000102939	0.00299945	yes	-	-	-	-
Bra013025	31.6667	162	2.99333	14.9833	2.32353	3.54102e-07	1.93351e-05	yes	-	-	-	-
Bra013026	346	769	26.3367	60.4267	1.19811	0.00120153	0.0226298	yes	AT5G23240 (E=4e-216) | DNAJ heat shock N-terminal domain-containing protein	GO:0043229//intracellular organelle;GO:0043226//organelle;GO:0044424//intracellular part;GO:0043227//membrane-bounded organelle;GO:0005623//cell;GO:0044444//cytoplasmic part;GO:0005622//intracellular;GO:0009536//plastid;GO:0005737//cytoplasm;GO:0044464//cell part;GO:0043231//intracellular membrane-bounded organelle;GO:0005575//cellular_component	-	-
Bra013042	42.6667	12	4.13667	1.16333	-1.8302	0.00112003	0.0214595	yes	AT2G16900 (E=8e-153) | FUNCTIONS IN: molecular_function unknown; INVOLVED IN: biological_process unknown; LOCATED IN: plasma membrane; EXPRESSED IN: 24 plant structures; EXPRESSED DURING: 13 growth stages; CONTAINS InterPro DOMAIN/s: Phospholipase-like, arabidopsis (InterPro:IPR007942); BEST Arabidopsis thaliana protein match is: unknown protein (TAIR:AT4G35110.4); Has 353 Blast hits to 254 prote…	-	GO:0005488//binding;GO:0044877//macromolecular complex binding;GO:0003682//chromatin binding;GO:0003674//molecular_function	GO:0016043//cellular component organization;GO:0071840//cellular component organization or biogenesis;GO:0044699//single-organism process;GO:0009987//cellular process;GO:0008150//biological_process;GO:0044763//single-organism cellular process;GO:0008152//metabolic process;GO:0007049//cell cycle
Bra013057	0.333333	14	0.09	3.39667	5.23805	3.66652e-06	0.000155918	yes	AT2G16710 (E=5e-034) | hesB-like domain-containing protein	-	GO:0005198//structural molecule activity;GO:0005488//binding;GO:0003674//molecular_function	GO:0016043//cellular component organization;GO:0009058//biosynthetic process;GO:0008152//metabolic process;GO:0071840//cellular component organization or biogenesis;GO:0009987//cellular process;GO:0008150//biological_process
Bra013075	0	192.233	0.001	16.4933	14.0096	1.56035e-31	8.89371e-29	yes	AT2G16400 (E=7e-162) BLH7 | BLH7 (bell1-like homeodomain 7); DNA binding / transcription factor	GO:0005623//cell;GO:0043229//intracellular organelle;GO:0005622//intracellular;GO:0043227//membrane-bounded organelle;GO:0005575//cellular_component;GO:0005634//nucleus;GO:0044464//cell part;GO:0044424//intracellular part;GO:0043231//intracellular membrane-bounded organelle;GO:0043226//organelle	GO:0001071//nucleic acid binding transcription factor activity;GO:1901363//heterocyclic compound binding;GO:0003700//transcription factor activity, sequence-specific DNA binding;GO:0097159//organic cyclic compound binding;GO:0003676//nucleic acid binding;GO:0005488//binding;GO:0003677//DNA binding;GO:0003674//molecular_function	GO:0034641//cellular nitrogen compound metabolic process;GO:1901360//organic cyclic compound metabolic process;GO:0006139//nucleobase-containing compound metabolic process;GO:0008150//biological_process;GO:0044237//cellular metabolic process;GO:0046483//heterocycle metabolic process;GO:0009987//cellular process;GO:0006807//nitrogen compound metabolic process;GO:0044238//primary metabolic process;…
Bra013080	118.333	9.66667	10.6733	0.833333	-3.67897	6.44202e-08	4.04044e-06	yes	-	-	-	-
Bra013083	12.6667	2.33333	0.536667	0.103333	-2.37672	0.00303955	0.0473177	yes	AT2G16250 (E=8e-171) | leucine-rich repeat transmembrane protein kinase, putative	-	GO:0016740//transferase activity;GO:0097159//organic cyclic compound binding;GO:0000166//nucleotide binding;GO:0016301//kinase activity;GO:0003674//molecular_function;GO:0003824//catalytic activity;GO:0005488//binding;GO:0036094//small molecule binding;GO:1901265//nucleoside phosphate binding;GO:0005515//protein binding;GO:1901363//heterocyclic compound binding;GO:0016772//transferase activity, t…	GO:0044260//cellular macromolecule metabolic process;GO:0019538//protein metabolic process;GO:0009987//cellular process;GO:0044267//cellular protein metabolic process;GO:0043412//macromolecule modification;GO:0044238//primary metabolic process;GO:0036211//protein modification process;GO:0044237//cellular metabolic process;GO:0008150//biological_process;GO:0008152//metabolic process;GO:0043170//ma…
Bra013087	304.333	3.66667	57.4333	0.66	-6.44328	1.93063e-31	1.08145e-28	yes	AT2G15970 (E=7e-084) COR413-PM1, WCOR413, WCOR413-LIKE, ATCOR413-PM1, FL3-5A3 | COR413-PM1	GO:0016020//membrane;GO:0005575//cellular_component	-	-
Bra013148	30.6667	348.667	2.67667	31.9867	3.57896	4.19816e-08	2.74434e-06	yes	AT2G13360 (E=3e-217) AGT, AGT1 | AGT (ALANINE:GLYOXYLATE AMINOTRANSFERASE); alanine-glyoxylate transaminase/ serine-glyoxylate transaminase/ serine-pyruvate transaminase	-	GO:0003824//catalytic activity;GO:0003674//molecular_function;GO:0005488//binding	GO:0008150//biological_process;GO:0008152//metabolic process
Bra013151	100	26.6667	16.0367	4.12667	-1.95833	0.000102577	0.00299158	yes	-	-	-	-
Bra013152	358	162.667	28.5033	12.9067	-1.14301	0.000367368	0.008674	yes	AT5G42240 (E=5e-213) scpl42 | scpl42 (serine carboxypeptidase-like 42); serine-type carboxypeptidase	-	GO:0016787//hydrolase activity;GO:0003824//catalytic activity;GO:0003674//molecular_function	GO:0008152//metabolic process;GO:0071704//organic substance metabolic process;GO:0019538//protein metabolic process;GO:0008150//biological_process;GO:0043170//macromolecule metabolic process;GO:0044238//primary metabolic process
Bra013153	31.3333	3	4.69667	0.473333	-3.31071	5.08428e-06	0.000210962	yes	AT2G12462 (E=2e-111) | unknown protein	-	GO:0003674//molecular_function;GO:0005515//protein binding;GO:0005488//binding	-
Bra013154	1884	90.3333	130.913	6.30667	-4.37559	2.13887e-43	2.3962e-40	yes	-	-	-	-
Bra013159	686.477	1763.39	65.67	167.873	1.35407	1.47654e-06	6.92229e-05	yes	-	-	-	-
Bra013160	388.19	145.613	36.7933	13.8467	-1.40991	8.89761e-05	0.00265449	yes	-	-	-	-
Bra013165	649.333	272.667	115.443	45.92	-1.32999	0.00165787	0.0291306	yes	AT5G35320 (E=2e-042) | unknown protein	-	GO:0005488//binding;GO:0003674//molecular_function;GO:0005515//protein binding	GO:0009987//cellular process;GO:0006950//response to stress;GO:0009628//response to abiotic stimulus;GO:0008150//biological_process;GO:0050896//response to stimulus
Bra013413	75	18.3333	16.6533	4.03667	-2.04457	9.21897e-05	0.00273031	yes	-	-	-	-
Bra013428	9.66667	48.3333	1.65	8.25	2.32193	0.000152386	0.00417796	yes	-	-	-	-
Bra013529	3574.33	345.667	258.313	25.4833	-3.3415	1.05229e-20	2.92203e-18	yes	AT4G21480 (E=7e-260) | carbohydrate transmembrane transporter/ sugar:hydrogen symporter	GO:0016020//membrane;GO:0005575//cellular_component	GO:0003674//molecular_function;GO:0005215//transporter activity	GO:0008150//biological_process;GO:0051179//localization;GO:0009987//cellular process;GO:0051234//establishment of localization;GO:0006810//transport
Bra013547	281	629.333	17.4233	40.6667	1.22283	0.000872035	0.0174563	yes	AT4G21680 (E=2e-300) | proton-dependent oligopeptide transport (POT) family protein	GO:0016020//membrane;GO:0005575//cellular_component	GO:0005215//transporter activity;GO:0003674//molecular_function	GO:0006810//transport;GO:0008150//biological_process;GO:0051179//localization;GO:0051234//establishment of localization
Bra013554	5	0	0.73	0.001	-9.51175	0.001123	0.0214997	yes	AT4G36840 (E=2e-034) | FUNCTIONS IN: molecular_function unknown; INVOLVED IN: biological_process unknown; LOCATED IN: cellular_component unknown; CONTAINS InterPro DOMAIN/s: Galactose oxidase/kelch, beta-propeller (InterPro:IPR011043), Kelch repeat type 1 (InterPro:IPR006652), Kelch related (InterPro:IPR013089), Kelch-type beta propeller (InterPro:IPR015915); BEST Arabidopsis thaliana protein mat…	-	GO:0005515//protein binding;GO:0003674//molecular_function;GO:0005488//binding	-
Bra013570	0	273.343	0.001	40.5233	15.3065	1.3458e-34	9.30295e-32	yes	AT4G21895 (E=2e-045) | DNA binding	-	GO:0005488//binding;GO:0003677//DNA binding;GO:0097159//organic cyclic compound binding;GO:0003674//molecular_function;GO:1901363//heterocyclic compound binding;GO:0003676//nucleic acid binding	-
Bra013571	850.977	98.54	119.327	13.3333	-3.16181	2.36223e-15	4.01379e-13	yes	AT4G21895 (E=5e-046) | DNA binding	-	GO:1901363//heterocyclic compound binding;GO:0003674//molecular_function;GO:0097159//organic cyclic compound binding;GO:0003676//nucleic acid binding;GO:0005488//binding;GO:0003677//DNA binding	-
Bra013574	0	14.3333	0.001	3.12667	11.6104	6.79695e-07	3.46122e-05	yes	-	-	-	-
Bra013579	486.333	171	39.1	13.5567	-1.52817	0.000102572	0.00299158	yes	AT4G04610 (E=5e-207) APR1, APR, PRH19, ATAPR1 | APR1 (APS REDUCTASE 1); adenylyl-sulfate reductase	-	GO:0003674//molecular_function;GO:0003824//catalytic activity	GO:0042592//homeostatic process;GO:0019725//cellular homeostasis;GO:0009987//cellular process;GO:0044763//single-organism cellular process;GO:0065007//biological regulation;GO:0044699//single-organism process;GO:0008150//biological_process;GO:0065008//regulation of biological quality;GO:0008152//metabolic process
Bra013587	237	1279.33	11.5733	61.0133	2.39832	1.85831e-12	2.30438e-10	yes	AT4G22120 (E=0.0) | early-responsive to dehydration protein-related / ERD protein-related	GO:0016020//membrane;GO:0005575//cellular_component	-	-
Bra013599	0.333333	10.6667	0.0133333	0.44	5.04439	0.00095228	0.0188306	yes	AT4G22200 (E=0.0) AKT2/3, AKT3, AKT2 | AKT2/3 (ARABIDOPSIS POTASSIUM TRANSPORT 2/3); cyclic nucleotide binding / inward rectifier potassium channel/ protein binding	GO:0016020//membrane;GO:0005575//cellular_component	GO:0005515//protein binding;GO:0003674//molecular_function;GO:0005215//transporter activity;GO:0005488//binding	GO:0009058//biosynthetic process;GO:0051234//establishment of localization;GO:0009987//cellular process;GO:0008152//metabolic process;GO:0051179//localization;GO:0008150//biological_process;GO:0006810//transport
Bra013610	181.333	2.66667	34.0167	0.486667	-6.12716	1.67995e-22	5.1981e-20	yes	-	-	-	-
Bra013612	205	26	18.4	2.31667	-2.98958	9.93061e-05	0.00291187	yes	AT4G22340 (E=1e-171) | phosphatidate cytidylyltransferase, putative / CDP-diglyceride synthetase, putative	GO:0044464//cell part;GO:0005737//cytoplasm;GO:0043229//intracellular organelle;GO:0012505//endomembrane system;GO:0016020//membrane;GO:0043231//intracellular membrane-bounded organelle;GO:0005622//intracellular;GO:0005783//endoplasmic reticulum;GO:0005575//cellular_component;GO:0005623//cell;GO:0044424//intracellular part;GO:0044444//cytoplasmic part;GO:0043227//membrane-bounded organelle;GO:004…	GO:0016740//transferase activity;GO:0003824//catalytic activity;GO:0003674//molecular_function	GO:0009058//biosynthetic process;GO:0044238//primary metabolic process;GO:0040007//growth;GO:0008152//metabolic process;GO:0071704//organic substance metabolic process;GO:0008150//biological_process;GO:0044699//single-organism process;GO:0044710//single-organism metabolic process;GO:0006629//lipid metabolic process;GO:0009987//cellular process
Bra013614	114	20.3333	11.7333	2.15333	-2.44597	1.31539e-05	0.000496928	yes	AT4G22360 (E=1e-091) | SWIB complex BAF60b domain-containing protein	-	GO:0003677//DNA binding;GO:0003674//molecular_function;GO:0097159//organic cyclic compound binding;GO:0005488//binding;GO:0003676//nucleic acid binding;GO:0005515//protein binding;GO:1901363//heterocyclic compound binding	-
Bra013639	160.667	57	12.1767	4.51667	-1.43079	0.00179447	0.0309944	yes	-	-	-	-
Bra013646	7.33333	30.3333	0.92	3.61667	1.97495	0.00212942	0.0354595	yes	AT4G22770 (E=1e-111) | DNA-binding family protein	-	GO:0003677//DNA binding;GO:1901363//heterocyclic compound binding;GO:0003674//molecular_function;GO:0005488//binding;GO:0097159//organic cyclic compound binding;GO:0003676//nucleic acid binding	-
Bra013648	12	55	0.843333	4	2.24583	0.000406306	0.00940205	yes	AT4G22790 (E=5e-199) | MATE efflux family protein	GO:0005575//cellular_component;GO:0016020//membrane	GO:0005215//transporter activity;GO:0003674//molecular_function	GO:0008150//biological_process;GO:0009987//cellular process;GO:0006810//transport;GO:0051179//localization;GO:0051234//establishment of localization
Bra013652	9111.09	4.33333	921.44	0.463333	-10.9576	2.26795e-86	2.45612e-82	yes	AT4G22880 (E=3e-184) LDOX, TDS4, TT18, ANS | LDOX (LEUCOANTHOCYANIDIN DIOXYGENASE); leucocyanidin oxygenase	-	GO:0003674//molecular_function;GO:0005488//binding;GO:0003824//catalytic activity	GO:0008150//biological_process;GO:0008152//metabolic process
Bra013656	210.667	65	7.95333	2.50333	-1.66771	0.000317997	0.00771	yes	AT4G23190 (E=3e-150) CRK11, AT-RLK3 | CRK11 (CYSTEINE-RICH RLK11); kinase/ protein kinase	-	GO:0005488//binding;GO:0097159//organic cyclic compound binding;GO:1901265//nucleoside phosphate binding;GO:0016740//transferase activity;GO:0016301//kinase activity;GO:0003674//molecular_function;GO:0016772//transferase activity, transferring phosphorus-containing groups;GO:1901363//heterocyclic compound binding;GO:0003824//catalytic activity;GO:0036094//small molecule binding;GO:0000166//nucleo…	GO:0043170//macromolecule metabolic process;GO:0036211//protein modification process;GO:0008150//biological_process;GO:0019538//protein metabolic process;GO:0044238//primary metabolic process;GO:0006464//cellular protein modification process;GO:0044237//cellular metabolic process;GO:0044267//cellular protein metabolic process;GO:0043412//macromolecule modification;GO:0071704//organic substance me…
Bra013657	33.3333	2.66667	2.16333	0.163333	-3.72736	4.5965e-06	0.000191948	yes	AT4G23190 (E=7e-088) CRK11, AT-RLK3 | CRK11 (CYSTEINE-RICH RLK11); kinase/ protein kinase	-	GO:0016301//kinase activity;GO:0003674//molecular_function;GO:0097159//organic cyclic compound binding;GO:0016740//transferase activity;GO:1901363//heterocyclic compound binding;GO:0016772//transferase activity, transferring phosphorus-containing groups;GO:1901265//nucleoside phosphate binding;GO:0036094//small molecule binding;GO:0003824//catalytic activity;GO:0000166//nucleotide binding;GO:0005…	GO:0044260//cellular macromolecule metabolic process;GO:0019538//protein metabolic process;GO:0044237//cellular metabolic process;GO:0006464//cellular protein modification process;GO:0009987//cellular process;GO:0008150//biological_process;GO:0043170//macromolecule metabolic process;GO:0044238//primary metabolic process;GO:0008152//metabolic process;GO:0071704//organic substance metabolic process…
Bra013663	538.667	13.3333	115.4	2.9	-5.31445	9.6376e-19	2.30232e-16	yes	-	-	-	-
Bra013668	6.33333	39	0.316667	1.97667	2.64203	0.000578134	0.0125224	yes	AT4G22990 (E=0.0) | SPX (SYG1/Pho81/XPR1) domain-containing protein	GO:0016020//membrane;GO:0005575//cellular_component	-	GO:0006810//transport;GO:0009987//cellular process;GO:0051234//establishment of localization;GO:0051179//localization;GO:0008150//biological_process
Bra013669	19	85.6667	1.94667	8.60667	2.14445	0.000210976	0.00550997	yes	AT4G23010 (E=3e-175) ATUTR2, UTR2 | UDP-galactose transporter-related	GO:0016020//membrane;GO:0005575//cellular_component	-	GO:0008150//biological_process;GO:0009987//cellular process;GO:0006810//transport;GO:0051234//establishment of localization;GO:0051179//localization
Bra013670	14.3333	1.66667	1.19667	0.13	-3.20244	0.000364593	0.00862728	yes	-	-	-	-
Bra013672	625.333	209.667	47.58	15.9933	-1.57288	2.46198e-05	0.000863794	yes	AT4G23060 (E=1e-131) IQD22 | IQD22 (IQ-domain 22); calmodulin binding	-	GO:0005515//protein binding;GO:0005488//binding;GO:0003674//molecular_function	-
Bra013684	5.66667	47	0.166667	1.45333	3.12433	1.51462e-06	7.07018e-05	yes	AT4G23290 (E=3e-165) | protein kinase family protein	-	GO:0097159//organic cyclic compound binding;GO:0000166//nucleotide binding;GO:0005488//binding;GO:0016740//transferase activity;GO:0016301//kinase activity;GO:0036094//small molecule binding;GO:1901363//heterocyclic compound binding;GO:1901265//nucleoside phosphate binding;GO:0003824//catalytic activity;GO:0016772//transferase activity, transferring phosphorus-containing groups;GO:0003674//molecu…	GO:0009987//cellular process;GO:0008152//metabolic process;GO:0008150//biological_process;GO:0071704//organic substance metabolic process;GO:0044260//cellular macromolecule metabolic process;GO:0043412//macromolecule modification;GO:0019538//protein metabolic process;GO:0044267//cellular protein metabolic process;GO:0006464//cellular protein modification process;GO:0043170//macromolecule metaboli…
Bra013693	112	369.333	15.2367	49.6367	1.70386	9.77269e-07	4.8034e-05	yes	-	-	-	-
Bra013714	43.3333	0.666667	3.84	0.0666667	-5.848	4.95609e-11	5.05406e-09	yes	AT4G23600 (E=1e-197) CORI3, JR2 | CORI3 (CORONATINE INDUCED 1); cystathionine beta-lyase/ transaminase	GO:0005773//vacuole;GO:0043226//organelle;GO:0043227//membrane-bounded organelle;GO:0005575//cellular_component;GO:0043231//intracellular membrane-bounded organelle;GO:0044444//cytoplasmic part;GO:0005576//extracellular region;GO:0005737//cytoplasm;GO:0044464//cell part;GO:0044424//intracellular part;GO:0005623//cell;GO:0043229//intracellular organelle;GO:0005622//intracellular	GO:0003674//molecular_function;GO:0016740//transferase activity;GO:0005488//binding;GO:0003824//catalytic activity	GO:0044699//single-organism process;GO:0007275//multicellular organism development;GO:0008152//metabolic process;GO:0006950//response to stress;GO:0006139//nucleobase-containing compound metabolic process;GO:0009628//response to abiotic stimulus;GO:0048856//anatomical structure development;GO:0006725//cellular aromatic compound metabolic process;GO:0034641//cellular nitrogen compound metabolic pr…
Bra013748	7.33333	26.6667	0.436667	1.61	1.88246	0.00246853	0.0398016	yes	AT4G23980 (E=7e-182) ARF9 | ARF9 (AUXIN RESPONSE FACTOR 9); transcription factor	GO:0005623//cell;GO:0043227//membrane-bounded organelle;GO:0043231//intracellular membrane-bounded organelle;GO:0043226//organelle;GO:0043229//intracellular organelle;GO:0005575//cellular_component;GO:0044424//intracellular part;GO:0044464//cell part;GO:0005634//nucleus;GO:0005622//intracellular	GO:0005488//binding;GO:0097159//organic cyclic compound binding;GO:1901363//heterocyclic compound binding;GO:0003676//nucleic acid binding;GO:0003674//molecular_function;GO:0003677//DNA binding;GO:0005515//protein binding	GO:0044237//cellular metabolic process;GO:0006139//nucleobase-containing compound metabolic process;GO:0008150//biological_process;GO:0008152//metabolic process;GO:0050794//regulation of cellular process;GO:0009719//response to endogenous stimulus;GO:0006725//cellular aromatic compound metabolic process;GO:0007165//signal transduction;GO:0044700//single organism signaling;GO:0034641//cellular nit…
Bra013751	1.66667	24.3333	0.333333	5.23333	3.97269	0.000137422	0.00381273	yes	AT4G24015 (E=1e-061) | zinc finger (RING-H2 type) protein-related	-	GO:0005488//binding;GO:0005515//protein binding;GO:0003674//molecular_function	-
Bra013765	71	10	16.4967	2.38667	-2.78911	3.33486e-06	0.000143315	yes	-	-	-	-
Bra013778	9.66667	54.6667	0.976667	5.38333	2.46256	1.38468e-05	0.000520078	yes	AT4G24230 (E=1e-080) ACBP3 | ACBP3 (ACYL-COA-BINDING DOMAIN 3); acyl-CoA binding	-	GO:0003674//molecular_function;GO:0005488//binding	-
Bra013781	0	226	0.001	13.8567	13.7583	1.78977e-33	1.14016e-30	yes	AT1G65610 (E=4e-160) ATGH9A2, KOR2 | KOR2; catalytic/ hydrolase, hydrolyzing O-glycosyl compounds	-	GO:0003824//catalytic activity;GO:0003674//molecular_function;GO:0016787//hydrolase activity	GO:0005975//carbohydrate metabolic process;GO:0044238//primary metabolic process;GO:0008152//metabolic process;GO:0008150//biological_process;GO:0071704//organic substance metabolic process;GO:0009987//cellular process;GO:0009056//catabolic process
Bra013784	206	1104	9.11333	49.0333	2.42771	9.42651e-13	1.21531e-10	yes	AT4G24270 (E=0.0) | RNA recognition motif (RRM)-containing protein	GO:0005623//cell;GO:0043229//intracellular organelle;GO:0005634//nucleus;GO:0044424//intracellular part;GO:0005622//intracellular;GO:0044464//cell part;GO:0043231//intracellular membrane-bounded organelle;GO:0043227//membrane-bounded organelle;GO:0043226//organelle;GO:0005575//cellular_component	GO:0003676//nucleic acid binding;GO:0097159//organic cyclic compound binding;GO:0000166//nucleotide binding;GO:1901265//nucleoside phosphate binding;GO:0003674//molecular_function;GO:1901363//heterocyclic compound binding;GO:0005488//binding;GO:0005515//protein binding;GO:0036094//small molecule binding	GO:0007275//multicellular organism development;GO:0006725//cellular aromatic compound metabolic process;GO:0044763//single-organism cellular process;GO:0032501//multicellular organismal process;GO:0030154//cell differentiation;GO:0006139//nucleobase-containing compound metabolic process;GO:0008152//metabolic process;GO:0009987//cellular process;GO:0008150//biological_process;GO:0006807//nitrogen …
Bra013818	848.333	288.333	26.9167	9.31	-1.53165	5.27628e-06	0.000218093	yes	-	-	-	-
Bra013856	226	73.6667	22.33	7.28667	-1.61565	4.84207e-05	0.00156687	yes	-	-	-	-
Bra013863	1316	3330.67	232.733	567.177	1.28512	9.02479e-05	0.00268258	yes	AT4G25100 (E=1e-096) FSD1 | FSD1 (FE SUPEROXIDE DISMUTASE 1); copper ion binding / superoxide dismutase	GO:0005739//mitochondrion;GO:0044424//intracellular part;GO:0043227//membrane-bounded organelle;GO:0016020//membrane;GO:0043231//intracellular membrane-bounded organelle;GO:0005622//intracellular;GO:0009536//plastid;GO:0071944//cell periphery;GO:0043229//intracellular organelle;GO:0044464//cell part;GO:0043226//organelle;GO:0005575//cellular_component;GO:0044444//cytoplasmic part;GO:0009579//thyl…	GO:0005488//binding;GO:0003674//molecular_function;GO:0003824//catalytic activity	GO:0050896//response to stimulus;GO:0008150//biological_process;GO:0006950//response to stress;GO:0008152//metabolic process;GO:0009987//cellular process
Bra013890	74.6667	22	7.46667	2.08333	-1.84157	0.000614961	0.0131444	yes	AT4G25420 (E=1e-187) GA5, GA20OX1, AT2301, ATGA20OX1 | GA20OX1; gibberellin 20-oxidase	-	GO:0003674//molecular_function;GO:0003824//catalytic activity;GO:0005488//binding	GO:0008152//metabolic process;GO:0008150//biological_process
Bra013924	1041.33	376	221.897	78.0067	-1.50822	3.35587e-06	0.000143838	yes	AT4G25830 (E=2e-080) | integral membrane family protein	GO:0005886//plasma membrane;GO:0016020//membrane;GO:0071944//cell periphery;GO:0005575//cellular_component;GO:0005623//cell;GO:0044464//cell part	-	-
Bra013966	21.6667	4.33333	1.48	0.31	-2.25526	0.00226105	0.0371194	yes	AT5G17580 (E=6e-188) | phototropic-responsive NPH3 family protein	-	GO:0005515//protein binding;GO:0003674//molecular_function;GO:0005488//binding	-
Bra013967	16.6667	69.6667	1.65333	6.99667	2.08129	0.000189495	0.00503622	yes	AT5G17570 (E=1e-150) | tatD-related deoxyribonuclease family protein	-	GO:0003824//catalytic activity;GO:0003674//molecular_function;GO:0016787//hydrolase activity;GO:0004518//nuclease activity;GO:0016788//hydrolase activity, acting on ester bonds	-
Bra013968	12.3333	293.333	2.46333	60.9767	4.62957	3.51747e-19	8.79071e-17	yes	-	-	-	-
Bra014004	1.83333	11.6667	0.26	1.72	2.72583	0.00115386	0.0219878	yes	-	-	-	-
Bra014036	1031	281.667	53.47	14.6067	-1.8721	2.00078e-10	1.84668e-08	yes	AT1G45130 (E=0.0) BGAL5 | BGAL5 (beta-galactosidase 5); beta-galactosidase/ catalytic/ cation binding	-	GO:0003824//catalytic activity;GO:0003674//molecular_function;GO:0016787//hydrolase activity	GO:0044238//primary metabolic process;GO:0005975//carbohydrate metabolic process;GO:0008152//metabolic process;GO:0071704//organic substance metabolic process;GO:0008150//biological_process
Bra014054	165.667	19.3333	18.41	2.09333	-3.13662	6.73587e-09	5.07753e-07	yes	AT1G46264 (E=9e-145) AT-HSFB4, HSFB4 | AT-HSFB4; DNA binding / transcription factor	GO:0005634//nucleus;GO:0005623//cell;GO:0043229//intracellular organelle;GO:0043226//organelle;GO:0005622//intracellular;GO:0043227//membrane-bounded organelle;GO:0044464//cell part;GO:0005575//cellular_component;GO:0044424//intracellular part;GO:0043231//intracellular membrane-bounded organelle	GO:0003677//DNA binding;GO:0003676//nucleic acid binding;GO:0003700//transcription factor activity, sequence-specific DNA binding;GO:0001071//nucleic acid binding transcription factor activity;GO:0005488//binding;GO:1901363//heterocyclic compound binding;GO:0003674//molecular_function;GO:0097159//organic cyclic compound binding	GO:1901360//organic cyclic compound metabolic process;GO:0009058//biosynthetic process;GO:0044237//cellular metabolic process;GO:0071704//organic substance metabolic process;GO:0006725//cellular aromatic compound metabolic process;GO:0008150//biological_process;GO:0006807//nitrogen compound metabolic process;GO:0006950//response to stress;GO:0044238//primary metabolic process;GO:0050896//response…
Bra014071	32.6667	0	2.61333	0.001	-11.3517	9.96855e-10	8.54534e-08	yes	AT5G38820 (E=1e-180) | amino acid transporter family protein	GO:0016020//membrane;GO:0005575//cellular_component	-	-
Bra014116	567.807	123.77	53.9933	12.17	-2.14945	0.000349801	0.00835167	yes	AT1G48230 (E=4e-186) | phosphate translocator-related	GO:0005575//cellular_component;GO:0016020//membrane	-	-
Bra014164	40.3333	4	7.00333	0.66	-3.4075	6.02761e-07	3.1333e-05	yes	AT1G48960 (E=5e-099) | universal stress protein (USP) family protein	-	-	GO:0008150//biological_process;GO:0006950//response to stress;GO:0050896//response to stimulus
Bra014186	0	7	0.001	1.74667	10.7704	0.000218318	0.00566982	yes	AT1G49405 (E=3e-052) | integral membrane protein, putative	GO:0016020//membrane;GO:0005623//cell;GO:0005575//cellular_component;GO:0005886//plasma membrane;GO:0044464//cell part;GO:0071944//cell periphery	-	-
Bra014283	18	3.66667	3.97333	0.836667	-2.24762	0.00158264	0.0280975	yes	AT1G51090 (E=3e-032) | heavy-metal-associated domain-containing protein	-	GO:0003674//molecular_function;GO:0005488//binding	GO:0006810//transport;GO:0051234//establishment of localization;GO:0050896//response to stimulus;GO:0009628//response to abiotic stimulus;GO:0008150//biological_process;GO:0051179//localization;GO:0006950//response to stress;GO:0009719//response to endogenous stimulus
Bra014338	373.667	127	26.89	9.19667	-1.54789	2.41422e-05	0.000849512	yes	AT2G01170 (E=1e-276) BAT1 | BAT1 (BIDIRECTIONAL AMINO ACID TRANSPORTER 1); amino acid transmembrane transporter	GO:0016020//membrane;GO:0005575//cellular_component	GO:0005215//transporter activity;GO:0003674//molecular_function	GO:0008150//biological_process;GO:0006810//transport;GO:0009987//cellular process;GO:0051179//localization;GO:0051234//establishment of localization
Bra014339	73.3333	25.6667	17.9467	6.25	-1.52179	0.00191462	0.0326467	yes	AT1G15100 (E=2e-037) RHA2A | RHA2A; protein binding / ubiquitin-protein ligase/ zinc ion binding	-	GO:0003674//molecular_function;GO:0005488//binding;GO:0005515//protein binding	-
Bra014364	21	141	0.633333	4.26	2.74982	1.91524e-09	1.58735e-07	yes	AT1G54280 (E=0.0) | haloacid dehalogenase-like hydrolase family protein	GO:0005575//cellular_component;GO:0016020//membrane	GO:0097159//organic cyclic compound binding;GO:0005215//transporter activity;GO:0036094//small molecule binding;GO:0000166//nucleotide binding;GO:0003674//molecular_function;GO:0005488//binding;GO:0016787//hydrolase activity;GO:1901363//heterocyclic compound binding;GO:1901265//nucleoside phosphate binding;GO:0003824//catalytic activity	GO:0008150//biological_process;GO:0051179//localization;GO:0016043//cellular component organization;GO:0009987//cellular process;GO:0006810//transport;GO:0071840//cellular component organization or biogenesis;GO:0051234//establishment of localization
Bra014401	864	392.667	190.647	89.8667	-1.08504	0.00195388	0.0331485	yes	AT3G62550 (E=5e-082) | universal stress protein (USP) family protein	-	-	GO:0006950//response to stress;GO:0050896//response to stimulus;GO:0008150//biological_process
Bra014417	3	21	0.476667	3.29667	2.78996	0.000261573	0.00653209	yes	AT3G61890 (E=1e-102) ATHB-12, ATHB12 | ATHB-12 (ARABIDOPSIS THALIANA HOMEOBOX 12); transcription activator/ transcription factor	GO:0043231//intracellular membrane-bounded organelle;GO:0005575//cellular_component;GO:0043227//membrane-bounded organelle;GO:0005622//intracellular;GO:0005634//nucleus;GO:0044464//cell part;GO:0043226//organelle;GO:0043229//intracellular organelle;GO:0044424//intracellular part;GO:0005623//cell	GO:0003674//molecular_function;GO:1901363//heterocyclic compound binding;GO:0003700//transcription factor activity, sequence-specific DNA binding;GO:0003676//nucleic acid binding;GO:0001071//nucleic acid binding transcription factor activity;GO:0005488//binding;GO:0003677//DNA binding;GO:0097159//organic cyclic compound binding	GO:0009058//biosynthetic process;GO:0009987//cellular process;GO:0044237//cellular metabolic process;GO:0044238//primary metabolic process;GO:0006807//nitrogen compound metabolic process;GO:0006139//nucleobase-containing compound metabolic process;GO:0006725//cellular aromatic compound metabolic process;GO:0071704//organic substance metabolic process;GO:1901360//organic cyclic compound metabolic …
Bra014430	643.667	321.333	53.5233	26.52	-1.01309	0.00288643	0.045523	yes	AT3G61580 (E=9e-237) | delta-8 sphingolipid desaturase (SLD1)	GO:0005575//cellular_component;GO:0016020//membrane	GO:0003674//molecular_function;GO:0003824//catalytic activity;GO:0005488//binding	GO:0044699//single-organism process;GO:0009058//biosynthetic process;GO:0008150//biological_process;GO:0071704//organic substance metabolic process;GO:0008152//metabolic process;GO:0044238//primary metabolic process;GO:0009987//cellular process;GO:0006629//lipid metabolic process;GO:0044710//single-organism metabolic process
Bra014491	16.3333	72	2.22333	9.75667	2.13366	5.78645e-05	0.00182343	yes	-	-	-	-
Bra014499	205.333	71	22.19	7.74333	-1.51888	0.000110274	0.00318461	yes	AT3G60300 (E=2e-075) | RWD domain-containing protein	-	GO:0005488//binding;GO:0005515//protein binding;GO:0003674//molecular_function	-
Bra014543	93	25	9.98667	2.74	-1.86583	0.00118232	0.0223588	yes	AT3G59340 (E=5e-140) | unknown protein	GO:0005575//cellular_component;GO:0016020//membrane	-	GO:0051179//localization;GO:0051234//establishment of localization;GO:0008150//biological_process;GO:0006810//transport
Bra014554	1131.33	4034.33	87.9367	307.89	1.80788	3.03132e-05	0.00104327	yes	AT3G58750 (E=1e-219) CSY2 | CSY2 (citrate synthase 2); citrate (SI)-synthase	-	GO:0016740//transferase activity;GO:0003674//molecular_function;GO:0003824//catalytic activity	GO:0005975//carbohydrate metabolic process;GO:0044237//cellular metabolic process;GO:0071704//organic substance metabolic process;GO:0009987//cellular process;GO:0044238//primary metabolic process;GO:0008152//metabolic process;GO:0006091//generation of precursor metabolites and energy;GO:0008150//biological_process
Bra014587	12.3333	1	2.45667	0.213333	-3.52552	0.000232223	0.00595947	yes	-	-	-	-
Bra014588	56.6667	16.6667	5.14333	1.56667	-1.71501	0.00240621	0.0390097	yes	AT3G58060 (E=1e-198) | cation efflux family protein / metal tolerance protein, putative (MTPc3)	GO:0005575//cellular_component;GO:0016020//membrane	GO:0005215//transporter activity;GO:0003674//molecular_function	GO:0051234//establishment of localization;GO:0006810//transport;GO:0008150//biological_process;GO:0051179//localization;GO:0009987//cellular process
Bra014615	10.9233	0.333333	2.01	0.0566667	-5.14855	0.00023719	0.00605347	yes	-	-	-	-
Bra014616	46	286.333	3.44667	21.54	2.64374	1.02322e-11	1.15831e-09	yes	AT3G57610 (E=8e-244) ADSS | ADSS (ADENYLOSUCCINATE SYNTHASE); adenylosuccinate synthase	GO:0009536//plastid;GO:0044424//intracellular part;GO:0044444//cytoplasmic part;GO:0005737//cytoplasm;GO:0005623//cell;GO:0043229//intracellular organelle;GO:0043231//intracellular membrane-bounded organelle;GO:0043227//membrane-bounded organelle;GO:0005622//intracellular;GO:0005575//cellular_component;GO:0044464//cell part;GO:0043226//organelle	GO:1901265//nucleoside phosphate binding;GO:0003674//molecular_function;GO:0097159//organic cyclic compound binding;GO:1901363//heterocyclic compound binding;GO:0036094//small molecule binding;GO:0000166//nucleotide binding;GO:0003824//catalytic activity;GO:0005488//binding	GO:0006807//nitrogen compound metabolic process;GO:0071704//organic substance metabolic process;GO:0044237//cellular metabolic process;GO:0034641//cellular nitrogen compound metabolic process;GO:0006725//cellular aromatic compound metabolic process;GO:1901360//organic cyclic compound metabolic process;GO:0044238//primary metabolic process;GO:0046483//heterocycle metabolic process;GO:0008152//meta…
Bra014625	71.1767	245.57	2.99	10.44	1.8039	0.000440624	0.00998287	yes	-	-	-	-
Bra014628	229	55.3333	33.3233	8.06333	-2.04708	2.94562e-07	1.62756e-05	yes	AT3G57390 (E=2e-081) AGL18 | AGL18; transcription factor	GO:0043226//organelle;GO:0005634//nucleus;GO:0044424//intracellular part;GO:0043229//intracellular organelle;GO:0043227//membrane-bounded organelle;GO:0005623//cell;GO:0044464//cell part;GO:0005622//intracellular;GO:0005575//cellular_component;GO:0043231//intracellular membrane-bounded organelle	GO:0097159//organic cyclic compound binding;GO:0003676//nucleic acid binding;GO:0005488//binding;GO:0003700//transcription factor activity, sequence-specific DNA binding;GO:0003677//DNA binding;GO:0001071//nucleic acid binding transcription factor activity;GO:0003674//molecular_function;GO:0005515//protein binding;GO:1901363//heterocyclic compound binding	GO:0008152//metabolic process;GO:0034641//cellular nitrogen compound metabolic process;GO:0006807//nitrogen compound metabolic process;GO:0044237//cellular metabolic process;GO:0009058//biosynthetic process;GO:0046483//heterocycle metabolic process;GO:0009987//cellular process;GO:0044238//primary metabolic process;GO:0071704//organic substance metabolic process;GO:1901360//organic cyclic compound…
Bra014648	231.667	490	18.01	38.53	1.09718	0.00234952	0.0383008	yes	AT3G57050 (E=9e-221) CBL | CBL (cystathionine beta-lyase); cystathionine beta-lyase	-	GO:0005488//binding;GO:0003824//catalytic activity;GO:0003674//molecular_function	GO:0009058//biosynthetic process;GO:0008150//biological_process;GO:0008152//metabolic process;GO:0009987//cellular process
Bra014663	13.6667	0.666667	3.69333	0.183333	-4.33238	1.69098e-05	0.000620071	yes	-	-	-	-
Bra014665	1540.24	767.277	247.36	123.14	-1.00631	0.00131207	0.0242271	yes	-	-	-	-
Bra014671	163.877	333.493	40.9167	82.0333	1.00352	0.00301317	0.0469971	yes	AT2G27030 (E=1e-081) CAM5 | CAM5 (CALMODULIN 5); calcium ion binding	-	GO:0003674//molecular_function;GO:0005488//binding	-
Bra014674	8.33333	0	1.98667	0.001	-10.9561	0.000745069	0.01534	yes	-	-	-	-
Bra014697	64.3333	183.667	15.7367	43.9367	1.4813	0.000467915	0.0104842	yes	AT2G40510 (E=2e-036) | 40S ribosomal protein S26 (RPS26A)	GO:0043228//non-membrane-bounded organelle;GO:0005623//cell;GO:0030529//intracellular ribonucleoprotein complex;GO:0044444//cytoplasmic part;GO:0005575//cellular_component;GO:0043229//intracellular organelle;GO:0005622//intracellular;GO:1990904//ribonucleoprotein complex;GO:0032991//macromolecular complex;GO:0044464//cell part;GO:0043226//organelle;GO:0005840//ribosome;GO:0043232//intracellular n…	GO:0005198//structural molecule activity;GO:0003674//molecular_function	GO:0043604//amide biosynthetic process;GO:0006807//nitrogen compound metabolic process;GO:0044237//cellular metabolic process;GO:0044267//cellular protein metabolic process;GO:0009059//macromolecule biosynthetic process;GO:0010467//gene expression;GO:0008150//biological_process;GO:0044271//cellular nitrogen compound biosynthetic process;GO:0034641//cellular nitrogen compound metabolic process;GO:…
Bra014702	83.6667	361.333	18.2433	78.5867	2.10692	1.44714e-06	6.80405e-05	yes	AT3G56240 (E=3e-031) CCH | CCH (COPPER CHAPERONE); copper chaperone	-	GO:0005488//binding;GO:0003674//molecular_function	GO:0008150//biological_process;GO:0006810//transport;GO:0051234//establishment of localization;GO:0051179//localization
Bra014759	11.6667	0	1.08	0.001	-10.0768	1.23394e-05	0.000468932	yes	AT3G14205 (E=9e-089) | phosphoinositide phosphatase family protein	-	GO:0003674//molecular_function;GO:0016787//hydrolase activity;GO:0003824//catalytic activity	GO:0008150//biological_process;GO:0009058//biosynthetic process;GO:0071840//cellular component organization or biogenesis;GO:0044710//single-organism metabolic process;GO:0071704//organic substance metabolic process;GO:0044238//primary metabolic process;GO:0008152//metabolic process;GO:0044699//single-organism process;GO:0016043//cellular component organization;GO:0009987//cellular process;GO:000…
Bra014776	38.3333	12.3333	1.09	0.346667	-1.65271	0.00326211	0.0499868	yes	AT3G55090 (E=0.0) | ATPase, coupled to transmembrane movement of substances	GO:0016020//membrane;GO:0005575//cellular_component	GO:0000166//nucleotide binding;GO:0016787//hydrolase activity;GO:1901265//nucleoside phosphate binding;GO:0003674//molecular_function;GO:0003824//catalytic activity;GO:0036094//small molecule binding;GO:0097159//organic cyclic compound binding;GO:1901363//heterocyclic compound binding;GO:0005488//binding	GO:0009653//anatomical structure morphogenesis;GO:0048856//anatomical structure development;GO:0008150//biological_process;GO:0016043//cellular component organization;GO:0044767//single-organism developmental process;GO:0009987//cellular process;GO:0044699//single-organism process;GO:0044707//single-multicellular organism process;GO:0032502//developmental process;GO:0007275//multicellular organis…
Bra014790	577.13	1287.3	29.3733	66.6033	1.18109	0.000562961	0.0122423	yes	-	-	-	-
Bra014796	2015	324.333	106.183	17.6	-2.59291	1.73369e-10	1.62322e-08	yes	AT3G62210 (E=2e-020) EDA32 | EDA32 (embryo sac development arrest 32)	GO:0005777//peroxisome;GO:0005575//cellular_component;GO:0043226//organelle;GO:0044444//cytoplasmic part;GO:0042579//microbody;GO:0005623//cell;GO:0044464//cell part;GO:0005622//intracellular;GO:0043229//intracellular organelle;GO:0005737//cytoplasm;GO:0043227//membrane-bounded organelle;GO:0043231//intracellular membrane-bounded organelle;GO:0044424//intracellular part	-	GO:0008150//biological_process;GO:0008152//metabolic process
Bra014813	3	20	0.373333	2.42667	2.70044	0.000585284	0.0126264	yes	AT3G54480 (E=5e-126) SKIP5, SKP5 | SKIP5 (SKP1/ASK-INTERACTING PROTEIN 5)	-	GO:0005515//protein binding;GO:0003674//molecular_function;GO:0005488//binding	-
Bra014818	11.6667	1.33333	2.08333	0.24	-3.11779	0.00246542	0.0397848	yes	-	-	-	-
Bra014820	118.333	34.6667	6.09	1.8	-1.75845	0.000125976	0.0035282	yes	AT3G54350 (E=1e-256) emb1967 | emb1967 (embryo defective 1967)	-	GO:0005515//protein binding;GO:0005488//binding;GO:0003674//molecular_function	-
Bra014826	0.333333	21	0.0166667	0.98	5.87774	5.23979e-08	3.35109e-06	yes	AT3G54270 (E=3e-183) | sucrose-phosphatase 3 (SPP3)	-	GO:0005488//binding;GO:0003824//catalytic activity;GO:0016787//hydrolase activity;GO:0003674//molecular_function	GO:0008150//biological_process;GO:0005975//carbohydrate metabolic process;GO:0009058//biosynthetic process;GO:0009987//cellular process;GO:0044238//primary metabolic process;GO:0071704//organic substance metabolic process;GO:0008152//metabolic process
Bra014841	125.333	1.33333	11.1333	0.11	-6.66124	2.53095e-20	6.90991e-18	yes	AT3G54050 (E=1e-194) | fructose-1,6-bisphosphatase, putative / D-fructose-1,6-bisphosphate 1-phosphohydrolase, putative / FBPase, putative	-	GO:0016787//hydrolase activity;GO:0003674//molecular_function;GO:0003824//catalytic activity	GO:0005975//carbohydrate metabolic process;GO:0008150//biological_process;GO:0071704//organic substance metabolic process;GO:0008152//metabolic process;GO:0044238//primary metabolic process
Bra014891	67.6667	22.6667	4.13333	1.35	-1.61435	0.00174814	0.0304043	yes	AT1G30820 (E=3e-299) | CTP synthase, putative / UTP--ammonia ligase, putative	-	GO:0097159//organic cyclic compound binding;GO:1901265//nucleoside phosphate binding;GO:0003674//molecular_function;GO:0003824//catalytic activity;GO:0005488//binding;GO:1901363//heterocyclic compound binding;GO:0000166//nucleotide binding;GO:0036094//small molecule binding	GO:0044238//primary metabolic process;GO:1901360//organic cyclic compound metabolic process;GO:0009058//biosynthetic process;GO:0008150//biological_process;GO:0044237//cellular metabolic process;GO:0006807//nitrogen compound metabolic process;GO:0006139//nucleobase-containing compound metabolic process;GO:0071704//organic substance metabolic process;GO:0009987//cellular process;GO:0034641//cellul…
Bra014901	14.3333	0.666667	0.79	0.04	-4.30378	0.000734309	0.0151665	yes	-	-	-	-
Bra014944	288.667	49.6667	59.7133	10.08	-2.56656	4.20912e-07	2.2566e-05	yes	-	-	-	-
Bra014982	5	0	2.91	0.001	-11.5068	0.00115504	0.0219965	yes	-	-	-	-
Bra015000	76.6667	402.333	6.05	33.2267	2.45733	7.24299e-06	0.000290157	yes	AT3G24230 (E=8e-198) | pectate lyase family protein	-	GO:0003674//molecular_function;GO:0003824//catalytic activity;GO:0005488//binding	GO:0044238//primary metabolic process;GO:0009056//catabolic process;GO:0005975//carbohydrate metabolic process;GO:0008150//biological_process;GO:0071704//organic substance metabolic process;GO:0008152//metabolic process
Bra015120	115.667	24	10.4067	2.19333	-2.24631	5.33025e-06	0.000220044	yes	AT3G25250 (E=2e-162) AGC2-1, AGC2, OXI1 | AGC2-1 (OXIDATIVE SIGNAL-INDUCIBLE1); kinase	-	GO:0005488//binding;GO:0016772//transferase activity, transferring phosphorus-containing groups;GO:0036094//small molecule binding;GO:0003824//catalytic activity;GO:0003674//molecular_function;GO:0005515//protein binding;GO:0000166//nucleotide binding;GO:0097159//organic cyclic compound binding;GO:1901265//nucleoside phosphate binding;GO:1901363//heterocyclic compound binding;GO:0016740//transfer…	GO:0008150//biological_process;GO:0044238//primary metabolic process;GO:0071704//organic substance metabolic process;GO:0044237//cellular metabolic process;GO:0050896//response to stimulus;GO:0044260//cellular macromolecule metabolic process;GO:0009987//cellular process;GO:0043412//macromolecule modification;GO:0036211//protein modification process;GO:0008152//metabolic process;GO:0006464//cellul…
Bra015174	748	229.667	60.83	19.4533	-1.64477	5.08882e-05	0.00163694	yes	AT2G05940 (E=1e-225) | protein kinase, putative	-	GO:0016301//kinase activity;GO:0003674//molecular_function;GO:0003824//catalytic activity;GO:0000166//nucleotide binding;GO:1901265//nucleoside phosphate binding;GO:1901363//heterocyclic compound binding;GO:0016740//transferase activity;GO:0097159//organic cyclic compound binding;GO:0005488//binding;GO:0036094//small molecule binding;GO:0016772//transferase activity, transferring phosphorus-conta…	GO:0050896//response to stimulus;GO:0044700//single organism signaling;GO:0006950//response to stress;GO:0009719//response to endogenous stimulus;GO:0044267//cellular protein metabolic process;GO:0044238//primary metabolic process;GO:0044699//single-organism process;GO:0009991//response to extracellular stimulus;GO:0007154//cell communication;GO:0008150//biological_process;GO:0008152//metabolic p…
Bra015303	320.667	134	19.4867	8.04667	-1.27602	0.000238472	0.00607665	yes	AT1G04310 (E=2e-258) ERS2 | ERS2 (ETHYLENE RESPONSE SENSOR 2); ethylene binding / glycogen synthase kinase 3/ protein histidine kinase/ receptor	GO:0016020//membrane;GO:0005575//cellular_component	GO:0004872//receptor activity;GO:0003824//catalytic activity;GO:0005488//binding;GO:0016301//kinase activity;GO:0003674//molecular_function;GO:0060089//molecular transducer activity;GO:0004871//signal transducer activity;GO:0016740//transferase activity;GO:0016772//transferase activity, transferring phosphorus-containing groups;GO:0005515//protein binding	GO:0023052//signaling;GO:0050789//regulation of biological process;GO:0008152//metabolic process;GO:0008150//biological_process;GO:0051716//cellular response to stimulus;GO:0007165//signal transduction;GO:0009987//cellular process;GO:0050794//regulation of cellular process;GO:0044260//cellular macromolecule metabolic process;GO:0065007//biological regulation;GO:0009719//response to endogenous sti…
Bra015304	60	2.66667	22.4967	0.986667	-4.511	2.08847e-09	1.72214e-07	yes	-	-	-	-
Bra015313	1	343.667	0.0633333	22.2167	8.45446	5.23535e-40	5.15428e-37	yes	AT1G04400 (E=6e-300) CRY2, FHA, AT-PHH1, PHH1, ATCRY2 | CRY2 (CRYPTOCHROME 2); blue light photoreceptor/ protein homodimerization	-	GO:0003674//molecular_function;GO:0003824//catalytic activity;GO:0004872//receptor activity;GO:0060089//molecular transducer activity;GO:0004871//signal transducer activity	GO:0044699//single-organism process;GO:0044260//cellular macromolecule metabolic process;GO:0006259//DNA metabolic process;GO:0006139//nucleobase-containing compound metabolic process;GO:0007154//cell communication;GO:0065007//biological regulation;GO:0008152//metabolic process;GO:0071704//organic substance metabolic process;GO:0090304//nucleic acid metabolic process;GO:1901360//organic cyclic co…
Bra015486	10.3333	48.6667	0.653333	3.09333	2.24327	0.000840655	0.016901	yes	AT1G06250 (E=4e-196) | lipase class 3 family protein	-	GO:0016787//hydrolase activity;GO:0003674//molecular_function;GO:0003824//catalytic activity	GO:0008152//metabolic process;GO:0008150//biological_process;GO:0006629//lipid metabolic process;GO:0071704//organic substance metabolic process;GO:0044238//primary metabolic process;GO:0044710//single-organism metabolic process;GO:0044699//single-organism process
Bra015611	44	126	4.33333	12.9367	1.57792	0.00175605	0.0304766	yes	AT1G47610 (E=3e-169) | transducin family protein / WD-40 repeat family protein	-	GO:0005515//protein binding;GO:0003674//molecular_function;GO:0005488//binding	-
Bra015620	0	11.3333	0.001	1.83667	10.8429	0.000573362	0.0124435	yes	-	-	-	-
Bra015642	4.66667	27	0.266667	1.63333	2.61471	0.00127453	0.0237295	yes	AT1G77990 (E=3e-218) AST56, SULTR2;2 | AST56; sulfate transmembrane transporter	GO:0005575//cellular_component;GO:0016020//membrane	GO:0005215//transporter activity;GO:0003674//molecular_function	GO:0051234//establishment of localization;GO:0009987//cellular process;GO:0051179//localization;GO:0006810//transport;GO:0008150//biological_process
Bra015685	37	5.33333	2.70333	0.403333	-2.74469	0.00118866	0.0224526	yes	AT1G77210 (E=5e-185) | sugar transporter, putative	GO:0005886//plasma membrane;GO:0044464//cell part;GO:0016020//membrane;GO:0005575//cellular_component;GO:0071944//cell periphery;GO:0005623//cell	GO:0003674//molecular_function;GO:0005215//transporter activity	GO:0051234//establishment of localization;GO:0006810//transport;GO:0008150//biological_process;GO:0009987//cellular process;GO:0051179//localization
Bra015789	624	248	64.8567	25.6067	-1.34074	5.66662e-05	0.00178914	yes	AT1G76090 (E=9e-194) SMT3 | SMT3 (STEROL METHYLTRANSFERASE 3); S-adenosylmethionine-dependent methyltransferase/ sterol 24-C-methyltransferase	GO:0005623//cell;GO:0012505//endomembrane system;GO:0043227//membrane-bounded organelle;GO:0005737//cytoplasm;GO:0043231//intracellular membrane-bounded organelle;GO:0005622//intracellular;GO:0044464//cell part;GO:0005575//cellular_component;GO:0043229//intracellular organelle;GO:0005783//endoplasmic reticulum;GO:0044424//intracellular part;GO:0043226//organelle;GO:0044444//cytoplasmic part	GO:0016740//transferase activity;GO:0003824//catalytic activity;GO:0003674//molecular_function	GO:0044699//single-organism process;GO:0008152//metabolic process;GO:0006629//lipid metabolic process;GO:0009058//biosynthetic process;GO:0008150//biological_process;GO:0044710//single-organism metabolic process;GO:0009987//cellular process;GO:0044238//primary metabolic process;GO:0071704//organic substance metabolic process
Bra015802	2	24	0.196667	2.57	3.70794	0.000645639	0.0136511	yes	AT1G75900 (E=2e-165) | family II extracellular lipase 3 (EXL3)	-	GO:0003674//molecular_function;GO:0003824//catalytic activity;GO:0016787//hydrolase activity	GO:0008152//metabolic process;GO:0044710//single-organism metabolic process;GO:0071704//organic substance metabolic process;GO:0008150//biological_process;GO:0006629//lipid metabolic process;GO:0044699//single-organism process;GO:0044238//primary metabolic process
Bra015807	83	19	15.2167	3.41	-2.15781	0.00140188	0.0255301	yes	AT1G75840 (E=6e-099) ARAC5, ATGP3, ROP4, ATROP4 | ARAC5 (RAC-LIKE GTP BINDING PROTEIN 5); GTP binding / GTPase	GO:0005575//cellular_component;GO:0016020//membrane;GO:0005623//cell;GO:0044464//cell part;GO:0005622//intracellular	GO:0097159//organic cyclic compound binding;GO:0003674//molecular_function;GO:0005488//binding;GO:0000166//nucleotide binding;GO:1901265//nucleoside phosphate binding;GO:1901363//heterocyclic compound binding;GO:0036094//small molecule binding	GO:0050789//regulation of biological process;GO:0050896//response to stimulus;GO:0044763//single-organism cellular process;GO:0044699//single-organism process;GO:0009987//cellular process;GO:0065007//biological regulation;GO:0044700//single organism signaling;GO:0007154//cell communication;GO:0050794//regulation of cellular process;GO:0051716//cellular response to stimulus;GO:0008150//biological_…
Bra015821	12.6667	76.6667	0.973333	6.22667	2.67745	0.00010025	0.00293425	yes	-	-	-	-
Bra015829	253.333	783	8.33	25.36	1.60617	7.52497e-07	3.80808e-05	yes	AT1G75640 (E=0.0) | leucine-rich repeat family protein / protein kinase family protein	GO:0005886//plasma membrane;GO:0016020//membrane;GO:0005623//cell;GO:0044464//cell part;GO:0005575//cellular_component;GO:0071944//cell periphery	GO:0016740//transferase activity;GO:0016301//kinase activity;GO:0016772//transferase activity, transferring phosphorus-containing groups;GO:0000166//nucleotide binding;GO:1901265//nucleoside phosphate binding;GO:0097159//organic cyclic compound binding;GO:0003824//catalytic activity;GO:1901363//heterocyclic compound binding;GO:0005515//protein binding;GO:0005488//binding;GO:0003674//molecular_fun…	GO:0036211//protein modification process;GO:0071704//organic substance metabolic process;GO:0008150//biological_process;GO:0044267//cellular protein metabolic process;GO:0044237//cellular metabolic process;GO:0043412//macromolecule modification;GO:0044260//cellular macromolecule metabolic process;GO:0008152//metabolic process;GO:0043170//macromolecule metabolic process;GO:0044238//primary metabol…
Bra015839	1.33333	10.6667	0.126667	0.976667	2.94683	0.00231478	0.0378421	yes	AT1G75500 (E=1e-198) | nodulin MtN21 family protein	GO:0016020//membrane;GO:0005575//cellular_component	GO:0005215//transporter activity;GO:0003674//molecular_function	GO:0051234//establishment of localization;GO:0009987//cellular process;GO:0006810//transport;GO:0051179//localization;GO:0008150//biological_process
Bra015854	40.3333	11.3333	4.74667	1.32667	-1.83911	0.00137289	0.0250443	yes	-	-	-	-
Bra015943	604.667	206	68.9367	23.4167	-1.55774	0.0014881	0.0267999	yes	AT1G74020 (E=9e-145) SS2 | SS2 (STRICTOSIDINE SYNTHASE 2); strictosidine synthase	-	GO:0003674//molecular_function;GO:0003824//catalytic activity	GO:0008150//biological_process;GO:0009058//biosynthetic process;GO:0008152//metabolic process
Bra015967	365	145	37.3833	15.1733	-1.30086	0.000496608	0.0110282	yes	AT1G73760 (E=5e-117) | zinc finger (C3HC4-type RING finger) family protein	-	GO:0005488//binding;GO:0003674//molecular_function;GO:0005515//protein binding	-
Bra016050	0.666667	9.33333	0.05	0.823333	4.04148	0.00262024	0.0419355	yes	AT1G72540 (E=7e-202) | protein kinase, putative	-	GO:0005488//binding;GO:0016740//transferase activity;GO:0016301//kinase activity;GO:0000166//nucleotide binding;GO:0036094//small molecule binding;GO:0003674//molecular_function;GO:1901265//nucleoside phosphate binding;GO:0003824//catalytic activity;GO:0097159//organic cyclic compound binding;GO:1901363//heterocyclic compound binding;GO:0016772//transferase activity, transferring phosphorus-conta…	GO:0044267//cellular protein metabolic process;GO:0043412//macromolecule modification;GO:0043170//macromolecule metabolic process;GO:0009987//cellular process;GO:0071704//organic substance metabolic process;GO:0044237//cellular metabolic process;GO:0008152//metabolic process;GO:0044260//cellular macromolecule metabolic process;GO:0044238//primary metabolic process;GO:0006464//cellular protein mod…
Bra016070	172	21.6667	20.6833	2.69333	-2.941	3.89488e-05	0.00129652	yes	AT1G72290 (E=2e-044) | trypsin and protease inhibitor family protein / Kunitz family protein	-	GO:0030234//enzyme regulator activity;GO:0003674//molecular_function;GO:0098772//molecular function regulator	GO:0008152//metabolic process;GO:0071704//organic substance metabolic process;GO:0044238//primary metabolic process;GO:0043170//macromolecule metabolic process;GO:0008150//biological_process;GO:0009987//cellular process;GO:0019538//protein metabolic process
Bra016111	549.333	112	51.0567	10.32	-2.30666	1.20874e-12	1.54003e-10	yes	AT1G71840 (E=8e-178) | transducin family protein / WD-40 repeat family protein	-	GO:0005515//protein binding;GO:0003674//molecular_function;GO:0005488//binding	-
Bra016112	864.333	268	53.2467	16.2967	-1.70811	2.33529e-08	1.60404e-06	yes	AT1G71830 (E=2e-221) SERK1, ATSERK1 | SERK1 (SOMATIC EMBRYOGENESIS RECEPTOR-LIKE KINASE 1); kinase/ transmembrane receptor protein serine/threonine kinase	-	GO:0003674//molecular_function;GO:0036094//small molecule binding;GO:0016772//transferase activity, transferring phosphorus-containing groups;GO:0016301//kinase activity;GO:0003824//catalytic activity;GO:0005488//binding;GO:1901363//heterocyclic compound binding;GO:0000166//nucleotide binding;GO:0005515//protein binding;GO:1901265//nucleoside phosphate binding;GO:0097159//organic cyclic compound …	GO:0019538//protein metabolic process;GO:0008150//biological_process;GO:0044237//cellular metabolic process;GO:0071704//organic substance metabolic process;GO:0006464//cellular protein modification process;GO:0043170//macromolecule metabolic process;GO:0008152//metabolic process;GO:0044267//cellular protein metabolic process;GO:0044260//cellular macromolecule metabolic process;GO:0043412//macromo…
Bra016115	480	98	71.5233	14.1067	-2.34204	4.00951e-09	3.12386e-07	yes	AT1G69640 (E=9e-069) SBH1 | SBH1 (SPHINGOID BASE HYDROXYLASE 1); catalytic/ sphingosine hydroxylase	-	GO:0003674//molecular_function;GO:0003824//catalytic activity;GO:0005488//binding	GO:0008150//biological_process;GO:0008152//metabolic process;GO:0009058//biosynthetic process;GO:0044238//primary metabolic process;GO:0006629//lipid metabolic process;GO:0044699//single-organism process;GO:0009987//cellular process;GO:0071704//organic substance metabolic process;GO:0044710//single-organism metabolic process
Bra016117	184	9.33333	37.07	1.88	-4.30145	2.52408e-16	4.85236e-14	yes	-	-	-	-
Bra016164	235.667	26	44.0533	5.05	-3.1249	6.96345e-12	8.02254e-10	yes	AT1G71030 (E=9e-065) ATMYBL2, MYBL2 | MYBL2 (ARABIDOPSIS MYB-LIKE 2); DNA binding / transcription factor	-	GO:0003682//chromatin binding;GO:0044877//macromolecular complex binding;GO:0003674//molecular_function;GO:0097159//organic cyclic compound binding;GO:1901363//heterocyclic compound binding;GO:0003677//DNA binding;GO:0005488//binding;GO:0003676//nucleic acid binding	-
Bra016171	112.667	0.333333	28.9567	0.0966667	-8.22666	7.50003e-21	2.11886e-18	yes	hydroxyproline-rich glycoprotein family protein [Source:TAIR;Acc:AT1G70985](projected from arabidopsis_thaliana,AT1G70985)	GO:0005575//cellular_component;GO:0016020//membrane	-	GO:0008152//metabolic process;GO:0009987//cellular process;GO:0008150//biological_process;GO:0009058//biosynthetic process
Bra016174	90.6667	20.3333	16.2567	3.72333	-2.12636	5.95577e-05	0.00186773	yes	AT1G70920 (E=6e-073) ATHB18 | ATHB18 (Arabidopsis thaliana homeobox-leucine zipper protein 18); DNA binding / transcription factor	GO:0005634//nucleus;GO:0043229//intracellular organelle;GO:0044464//cell part;GO:0005622//intracellular;GO:0005575//cellular_component;GO:0043227//membrane-bounded organelle;GO:0043226//organelle;GO:0043231//intracellular membrane-bounded organelle;GO:0005623//cell;GO:0044424//intracellular part	GO:0097159//organic cyclic compound binding;GO:1901363//heterocyclic compound binding;GO:0005488//binding;GO:0003676//nucleic acid binding;GO:0003677//DNA binding;GO:0003700//transcription factor activity, sequence-specific DNA binding;GO:0003674//molecular_function;GO:0001071//nucleic acid binding transcription factor activity	GO:0006725//cellular aromatic compound metabolic process;GO:0044238//primary metabolic process;GO:0008152//metabolic process;GO:0009987//cellular process;GO:0044237//cellular metabolic process;GO:0046483//heterocycle metabolic process;GO:0008150//biological_process;GO:0006139//nucleobase-containing compound metabolic process;GO:1901360//organic cyclic compound metabolic process;GO:0034641//cellul…
Bra016182	4.66667	57.6667	0.863333	10.5867	3.61619	4.85591e-07	2.56944e-05	yes	AT1G70830 (E=2e-076) MLP28 | MLP28 (MLP-LIKE PROTEIN 28)	-	-	GO:0008150//biological_process;GO:0050896//response to stimulus;GO:0006950//response to stress;GO:0009607//response to biotic stimulus
Bra016187	44.6667	140.333	12.46	40.2733	1.69252	0.000173051	0.00464266	yes	-	-	-	-
Bra016202	187.42	659.663	13.8133	49.42	1.83903	0.00322538	0.0495224	yes	AT1G70580 (E=5e-275) AOAT2, GGT2 | AOAT2 (ALANINE-2-OXOGLUTARATE AMINOTRANSFERASE 2); L-alanine:2-oxoglutarate aminotransferase/ glycine:2-oxoglutarate aminotransferase	-	GO:0003824//catalytic activity;GO:0005488//binding;GO:0003674//molecular_function	GO:0008150//biological_process;GO:0009058//biosynthetic process;GO:0008152//metabolic process
Bra016206	120	5.33333	6.85	0.313333	-4.45033	7.5946e-15	1.22149e-12	yes	AT1G70530 (E=5e-285) | protein kinase family protein	-	GO:1901363//heterocyclic compound binding;GO:0016301//kinase activity;GO:0000166//nucleotide binding;GO:0016772//transferase activity, transferring phosphorus-containing groups;GO:0036094//small molecule binding;GO:0097159//organic cyclic compound binding;GO:0003674//molecular_function;GO:0016740//transferase activity;GO:1901265//nucleoside phosphate binding;GO:0005488//binding;GO:0003824//cataly…	GO:0044238//primary metabolic process;GO:0071704//organic substance metabolic process;GO:0036211//protein modification process;GO:0043412//macromolecule modification;GO:0006464//cellular protein modification process;GO:0044267//cellular protein metabolic process;GO:0019538//protein metabolic process;GO:0009987//cellular process;GO:0044260//cellular macromolecule metabolic process;GO:0044237//cell…
Bra016207	65.6667	0	3.78333	0.001	-11.8854	1.13921e-17	2.48401e-15	yes	AT1G70520 (E=4e-310) | protein kinase family protein	-	GO:0005488//binding;GO:0003674//molecular_function;GO:0003824//catalytic activity;GO:0016772//transferase activity, transferring phosphorus-containing groups;GO:0036094//small molecule binding;GO:0016301//kinase activity;GO:0016740//transferase activity;GO:1901265//nucleoside phosphate binding;GO:1901363//heterocyclic compound binding;GO:0000166//nucleotide binding;GO:0097159//organic cyclic comp…	GO:0044260//cellular macromolecule metabolic process;GO:0008152//metabolic process;GO:0071704//organic substance metabolic process;GO:0008150//biological_process;GO:0036211//protein modification process;GO:0019538//protein metabolic process;GO:0006464//cellular protein modification process;GO:0044237//cellular metabolic process;GO:0043170//macromolecule metabolic process;GO:0044238//primary metab…
Bra016211	77.3333	0	6.26333	0.001	-12.6127	1.55519e-18	3.66135e-16	yes	AT3G29670 (E=2e-166) | transferase family protein	-	GO:0003824//catalytic activity;GO:0016740//transferase activity;GO:0003674//molecular_function	-
Bra016212	19.6667	0	2.52667	0.001	-11.303	1.07605e-08	7.86843e-07	yes	AT3G29670 (E=4e-092) | transferase family protein	-	GO:0016740//transferase activity;GO:0003824//catalytic activity;GO:0003674//molecular_function	-
Bra016221	81.3333	3.33333	11.5033	0.436667	-4.71938	3.56619e-11	3.73748e-09	yes	-	-	-	-
Bra016223	197.143	29	28.4833	4.05	-2.81412	4.69251e-10	4.16544e-08	yes	AT1G70410 (E=2e-134) ATBCA4, BCA4 | carbonic anhydrase, putative / carbonate dehydratase, putative	-	GO:0003674//molecular_function;GO:0005488//binding;GO:0003824//catalytic activity	GO:0008150//biological_process
Bra016224	5174.67	2187.67	312.673	131.113	-1.25384	0.000353688	0.0084296	yes	AT1G70370 (E=0.0) | BURP domain-containing protein / polygalacturonase, putative	-	-	GO:0005975//carbohydrate metabolic process;GO:0008150//biological_process;GO:0008152//metabolic process;GO:0071704//organic substance metabolic process;GO:0009058//biosynthetic process;GO:0044238//primary metabolic process;GO:0009987//cellular process
Bra016249	53	4.66667	11.12	1.02	-3.44652	2.3121e-07	1.31096e-05	yes	AT1G69935 (E=2e-036) SHW1 | SHW1 (SHORT HYPOCOTYL IN WHITE LIGHT1)	GO:0044464//cell part;GO:0005575//cellular_component;GO:0043229//intracellular organelle;GO:0005622//intracellular;GO:0005634//nucleus;GO:0044424//intracellular part;GO:0043227//membrane-bounded organelle;GO:0005623//cell;GO:0043231//intracellular membrane-bounded organelle;GO:0043226//organelle	-	GO:0044699//single-organism process;GO:0032501//multicellular organismal process;GO:0044767//single-organism developmental process;GO:0050896//response to stimulus;GO:0032502//developmental process;GO:0007275//multicellular organism development;GO:0044707//single-multicellular organism process;GO:0009628//response to abiotic stimulus;GO:0008150//biological_process;GO:0009791//post-embryonic devel…
Bra016254	196.333	34.3333	18.88	3.32333	-2.50616	1.25335e-05	0.0004757	yes	-	-	-	-
Bra016266	29.6667	6.33333	3.94333	0.856667	-2.20261	0.00316798	0.0487563	yes	AT1G69780 (E=8e-145) ATHB13 | ATHB13; DNA binding / sequence-specific DNA binding / transcription factor	GO:0044464//cell part;GO:0005622//intracellular;GO:0043226//organelle;GO:0005634//nucleus;GO:0043231//intracellular membrane-bounded organelle;GO:0043227//membrane-bounded organelle;GO:0005623//cell;GO:0005575//cellular_component;GO:0043229//intracellular organelle;GO:0044424//intracellular part	GO:0003700//transcription factor activity, sequence-specific DNA binding;GO:1901363//heterocyclic compound binding;GO:0003676//nucleic acid binding;GO:0005488//binding;GO:0001071//nucleic acid binding transcription factor activity;GO:0003677//DNA binding;GO:0003674//molecular_function;GO:0097159//organic cyclic compound binding	GO:0044237//cellular metabolic process;GO:0008150//biological_process;GO:0006139//nucleobase-containing compound metabolic process;GO:0006807//nitrogen compound metabolic process;GO:0009987//cellular process;GO:0071704//organic substance metabolic process;GO:0008152//metabolic process;GO:1901360//organic cyclic compound metabolic process;GO:0044238//primary metabolic process;GO:0009058//biosynthe…
Bra016272	3.33333	137.333	0.373333	15.3933	5.3657	9.22172e-06	0.000360535	yes	AT1G26390 (E=5e-149) | FAD-binding domain-containing protein	-	GO:1901363//heterocyclic compound binding;GO:0003824//catalytic activity;GO:1901265//nucleoside phosphate binding;GO:0000166//nucleotide binding;GO:0036094//small molecule binding;GO:0005488//binding;GO:0003674//molecular_function;GO:0097159//organic cyclic compound binding	GO:0008150//biological_process;GO:0008152//metabolic process
Bra016323	1363	510	176.62	67.6433	-1.38463	9.69216e-06	0.000377112	yes	-	-	-	GO:0008150//biological_process;GO:0050896//response to stimulus;GO:0009607//response to biotic stimulus;GO:0006950//response to stress
Bra016330	158.333	370	10.85	25.78	1.24856	0.000239097	0.00608609	yes	AT1G23800 (E=7e-279) ALDH2B7, ALDH2B | ALDH2B7; 3-chloroallyl aldehyde dehydrogenase/ aldehyde dehydrogenase (NAD)	-	GO:0003674//molecular_function;GO:0003824//catalytic activity	GO:0008152//metabolic process;GO:0008150//biological_process
Bra016381	55.3333	17.6667	3.99	1.21333	-1.71741	0.00234884	0.0383008	yes	AT1G22410 (E=5e-276) | 2-dehydro-3-deoxyphosphoheptonate aldolase, putative / 3-deoxy-D-arabino-heptulosonate 7-phosphate synthase, putative / DAHP synthetase, putative	-	GO:0003824//catalytic activity;GO:0016740//transferase activity;GO:0003674//molecular_function	GO:0008150//biological_process;GO:0009987//cellular process;GO:0008152//metabolic process;GO:0009058//biosynthetic process
Bra016382	2	28	0.156667	2.24	3.83773	3.87042e-06	0.000163945	yes	AT1G22370 (E=5e-230) AtUGT85A5 | AtUGT85A5 (UDP-glucosyl transferase 85A5); glucuronosyltransferase/ transferase, transferring glycosyl groups	-	GO:0003674//molecular_function;GO:0016740//transferase activity;GO:0003824//catalytic activity	GO:0008152//metabolic process;GO:0008150//biological_process
Bra016407	115	40	10.4767	3.65	-1.52121	0.000519861	0.0114585	yes	AT1G20940 (E=2e-098) | F-box family protein	-	GO:0005515//protein binding;GO:0003674//molecular_function;GO:0005488//binding	-
Bra016431	6.33333	35.3333	2.03	11.8733	2.54817	0.000402828	0.0093482	yes	-	-	-	-
Bra016459	139.677	542.017	10.0567	41.01	2.02782	0.000285478	0.00702642	yes	AT1G20620 (E=4e-300) CAT3, SEN2, ATCAT3 | CAT3 (CATALASE 3); catalase	-	GO:0003824//catalytic activity;GO:0005488//binding;GO:0003674//molecular_function	GO:0008152//metabolic process;GO:0050896//response to stimulus;GO:0008150//biological_process;GO:0006950//response to stress
Bra016479	0	19.6667	0.001	4.02	11.973	1.43395e-07	8.42451e-06	yes	-	-	-	-
Bra016483	89.3333	30	13.22	4.46667	-1.56545	0.0011663	0.0221381	yes	AT1G19970 (E=2e-087) | ER lumen protein retaining receptor family protein	GO:0016020//membrane;GO:0005575//cellular_component	GO:0005488//binding;GO:0003674//molecular_function	GO:0009987//cellular process;GO:0008150//biological_process
Bra016506	140.333	51.3333	35.39	12.8233	-1.46457	0.00109166	0.0209988	yes	AT1G19380 (E=8e-053) | unknown protein	-	-	GO:0009628//response to abiotic stimulus;GO:0006950//response to stress;GO:0050896//response to stimulus;GO:0009605//response to external stimulus;GO:0008150//biological_process;GO:0009719//response to endogenous stimulus
Bra016564	521.667	196.333	112.047	43.0333	-1.38057	0.000411365	0.00949207	yes	AT1G18210 (E=5e-077) | calcium-binding protein, putative	-	GO:0003674//molecular_function;GO:0005488//binding	-
Bra016565	7	0.333333	1.13333	0.0633333	-4.16146	0.000819402	0.0165557	yes	AT1G18200 (E=4e-107) AtRABA6b | AtRABA6b (Arabidopsis Rab GTPase homolog A6b); GTP binding / GTPase/ protein binding	-	GO:0005488//binding;GO:1901265//nucleoside phosphate binding;GO:0097159//organic cyclic compound binding;GO:0000166//nucleotide binding;GO:0003674//molecular_function;GO:0036094//small molecule binding;GO:1901363//heterocyclic compound binding	GO:0050896//response to stimulus;GO:0044700//single organism signaling;GO:0044699//single-organism process;GO:0051234//establishment of localization;GO:0009987//cellular process;GO:0051716//cellular response to stimulus;GO:0007165//signal transduction;GO:0007154//cell communication;GO:0065007//biological regulation;GO:0044763//single-organism cellular process;GO:0006810//transport;GO:0008150//bio…
Bra016568	0.333333	10.6667	0.02	0.663333	5.05166	0.000104636	0.00303258	yes	AT1G18140 (E=2e-302) LAC1, ATLAC1 | LAC1 (Laccase 1); laccase	GO:0005576//extracellular region;GO:0005575//cellular_component	GO:0003824//catalytic activity;GO:0003674//molecular_function;GO:0005488//binding	GO:0019748//secondary metabolic process;GO:0009056//catabolic process;GO:0044710//single-organism metabolic process;GO:0008150//biological_process;GO:0008152//metabolic process;GO:0009987//cellular process;GO:0044699//single-organism process
Bra016610	1929.33	316	73.2033	12.3433	-2.56818	3.87858e-08	2.54055e-06	yes	AT1G17260 (E=0.0) AHA10 | AHA10 (Autoinhibited H(+)-ATPase isoform 10); ATPase/ ATPase, coupled to transmembrane movement of ions, phosphorylative mechanism / cation-transporting ATPase	GO:0044444//cytoplasmic part;GO:0043229//intracellular organelle;GO:0005622//intracellular;GO:0005737//cytoplasm;GO:0016020//membrane;GO:0043231//intracellular membrane-bounded organelle;GO:0005575//cellular_component;GO:0043227//membrane-bounded organelle;GO:0009536//plastid;GO:0044424//intracellular part;GO:0043226//organelle;GO:0005623//cell;GO:0044464//cell part	GO:0003674//molecular_function;GO:0000166//nucleotide binding;GO:0005488//binding;GO:1901363//heterocyclic compound binding;GO:1901265//nucleoside phosphate binding;GO:0016787//hydrolase activity;GO:0005215//transporter activity;GO:0003824//catalytic activity;GO:0097159//organic cyclic compound binding;GO:0036094//small molecule binding	GO:0006139//nucleobase-containing compound metabolic process;GO:0034641//cellular nitrogen compound metabolic process;GO:0009987//cellular process;GO:0044237//cellular metabolic process;GO:0071840//cellular component organization or biogenesis;GO:0019748//secondary metabolic process;GO:0044238//primary metabolic process;GO:0042592//homeostatic process;GO:0008152//metabolic process;GO:1901360//org…
Bra016614	1	11.3333	0.173333	1.98333	3.51631	0.00024131	0.00612494	yes	AT1G17200 (E=2e-091) | integral membrane family protein	GO:0005886//plasma membrane;GO:0005575//cellular_component;GO:0071944//cell periphery;GO:0016020//membrane;GO:0044464//cell part;GO:0005623//cell	-	-
Bra016638	0.666667	17.3333	0.0466667	1.37	4.87564	0.000156489	0.00426883	yes	AT1G16390 (E=6e-240) ATOCT3 | ATOCT3 (ARABIDOPSIS THALIANA ORGANIC CATION/CARNITINE TRANSPORTER 3); carbohydrate transmembrane transporter/ sugar:hydrogen symporter	GO:0043231//intracellular membrane-bounded organelle;GO:0005623//cell;GO:0043229//intracellular organelle;GO:0016020//membrane;GO:0044424//intracellular part;GO:0044464//cell part;GO:0005737//cytoplasm;GO:0005622//intracellular;GO:0043227//membrane-bounded organelle;GO:0005575//cellular_component;GO:0043226//organelle;GO:0044444//cytoplasmic part;GO:0005773//vacuole	GO:0005215//transporter activity;GO:0003674//molecular_function	GO:0006810//transport;GO:0009987//cellular process;GO:0008150//biological_process;GO:0051234//establishment of localization;GO:0051179//localization
Bra016644	4084	1510.33	237.703	83.18	-1.51485	0.000120016	0.00340619	yes	AT1G16030 (E=0.0) Hsp70b | Hsp70b (heat shock protein 70B); ATP binding	-	GO:0005488//binding;GO:1901363//heterocyclic compound binding;GO:0003674//molecular_function;GO:0000166//nucleotide binding;GO:0097159//organic cyclic compound binding;GO:1901265//nucleoside phosphate binding;GO:0036094//small molecule binding	-
Bra016813	122.333	49	11.8267	4.64	-1.34985	0.00143538	0.0260818	yes	AT1G11790 (E=7e-184) ADT1 | ADT1 (arogenate dehydratase 1); arogenate dehydratase/ prephenate dehydratase	-	GO:0003674//molecular_function;GO:0003824//catalytic activity;GO:0005488//binding	GO:0009058//biosynthetic process;GO:0009987//cellular process;GO:0008150//biological_process;GO:0008152//metabolic process
Bra016849	21.6667	110.333	2.89	15.07	2.38254	3.3485e-06	0.000143711	yes	AT1G11190 (E=7e-105) BFN1, ENDO1 | BFN1 (BIFUNCTIONAL NUCLEASE I); T/G mismatch-specific endonuclease/ endoribonuclease, producing 5'-phosphomonoesters / nucleic acid binding / single-stranded DNA specific endodeoxyribonuclease	-	GO:0016787//hydrolase activity;GO:1901363//heterocyclic compound binding;GO:0016788//hydrolase activity, acting on ester bonds;GO:0003824//catalytic activity;GO:0097159//organic cyclic compound binding;GO:0005488//binding;GO:0004518//nuclease activity;GO:0003674//molecular_function;GO:0003676//nucleic acid binding	GO:0006259//DNA metabolic process;GO:0044260//cellular macromolecule metabolic process;GO:0046483//heterocycle metabolic process;GO:0006807//nitrogen compound metabolic process;GO:0071704//organic substance metabolic process;GO:0009987//cellular process;GO:0006725//cellular aromatic compound metabolic process;GO:0008152//metabolic process;GO:1901360//organic cyclic compound metabolic process;GO:0…
Bra016855	122.667	387.667	16.1267	49.6867	1.62341	0.000248274	0.00627076	yes	-	-	-	-
Bra016895	258.667	101.333	32.26	12.34	-1.3864	0.00152232	0.0272799	yes	-	-	-	-
Bra016978	114.333	31	10.6567	2.90667	-1.87432	0.00010999	0.00317923	yes	-	-	-	-
Bra016986	1852.33	646.667	85.46	29.3267	-1.54304	6.34202e-08	3.98542e-06	yes	AT5G14880 (E=2e-276) | potassium transporter, putative	GO:0044464//cell part;GO:0005575//cellular_component;GO:0016020//membrane;GO:0005886//plasma membrane;GO:0005623//cell;GO:0071944//cell periphery	GO:0003674//molecular_function;GO:0005215//transporter activity	GO:0044699//single-organism process;GO:0008152//metabolic process;GO:1901360//organic cyclic compound metabolic process;GO:0044767//single-organism developmental process;GO:0040007//growth;GO:0006139//nucleobase-containing compound metabolic process;GO:0034641//cellular nitrogen compound metabolic process;GO:0006810//transport;GO:0006807//nitrogen compound metabolic process;GO:0009058//biosynthet…
Bra017013	1.33333	13.3333	0.11	1.15333	3.39023	0.000248599	0.00627076	yes	-	-	-	-
Bra017090	88.6667	28.6667	7.90333	2.52667	-1.64523	0.000655774	0.0138096	yes	AT2G39110 (E=3e-187) | protein kinase, putative	-	GO:0000166//nucleotide binding;GO:0003824//catalytic activity;GO:0036094//small molecule binding;GO:0016740//transferase activity;GO:1901363//heterocyclic compound binding;GO:0016772//transferase activity, transferring phosphorus-containing groups;GO:0016301//kinase activity;GO:1901265//nucleoside phosphate binding;GO:0097159//organic cyclic compound binding;GO:0003674//molecular_function;GO:0005…	GO:0044260//cellular macromolecule metabolic process;GO:0071704//organic substance metabolic process;GO:0044238//primary metabolic process;GO:0008150//biological_process;GO:0036211//protein modification process;GO:0044237//cellular metabolic process;GO:0019538//protein metabolic process;GO:0006464//cellular protein modification process;GO:0008152//metabolic process;GO:0043412//macromolecule modif…
Bra017102	159.667	58	18.5933	6.62667	-1.48843	0.000789664	0.0160447	yes	AT2G38760 (E=6e-154) ANNAT3 | ANNAT3 (ANNEXIN ARABIDOPSIS 3); calcium ion binding / calcium-dependent phospholipid binding	-	GO:0003674//molecular_function;GO:0008289//lipid binding;GO:0005488//binding	-
Bra017139	13.6667	1	0.89	0.0766667	-3.53713	0.000267902	0.00667474	yes	AT2G38080 (E=3e-312) IRX12, LAC4 | IRX12 (IRREGULAR XYLEM 12); laccase	GO:0005575//cellular_component;GO:0005576//extracellular region	GO:0005488//binding;GO:0003824//catalytic activity;GO:0003674//molecular_function	GO:0019748//secondary metabolic process;GO:0008152//metabolic process;GO:0008150//biological_process;GO:0044699//single-organism process;GO:0009987//cellular process;GO:0044710//single-organism metabolic process;GO:0009056//catabolic process
Bra017145	204.667	612.527	10.4833	31.53	1.58863	5.79969e-06	0.000237912	yes	-	-	-	-
Bra017152	95.6667	21.6667	14.3933	3.18333	-2.17679	0.000425337	0.00971363	yes	-	-	-	-
Bra017164	13.3333	0	0.54	0.001	-9.07682	0.00315872	0.048706	yes	AT2G37670 (E=0.0) | WD-40 repeat family protein	-	GO:0005515//protein binding;GO:0003674//molecular_function;GO:0005488//binding	GO:0051704//multi-organism process;GO:0044706//multi-multicellular organism process;GO:0008150//biological_process;GO:0022414//reproductive process;GO:0044703//multi-organism reproductive process;GO:0009856//pollination;GO:0032501//multicellular organismal process;GO:0000003//reproduction
[truncated: 1,187 more rows]
