# Supplementary material for: Comparative transcriptome and flavonoids components analysis reveal the structural genes responsible for the yellow seed coat color of Brassica rapa L
Source: PeerJ. 2021 Mar 4;9:e10770. doi: 10.7717/peerj.10770 (PMC7937345; doi:10.7717/peerj.10770)
Supplement: Supplemental Information 13 [file peerj-09-10770-s013.xlsx]

## Sheet: Addition file 3
id	B147-28_count	B80-28_count	B147-28_fpkm	B80-28_fpkm	log2(FC)	Pvalue	FDR	significant	Description	GO Component	GO Function	GO Process
Bra000041	21	0	3.01	0.001	-11.5555	0.000492512	0.00755153	yes	AT2G38180 (E=1e-117) | GDSL-motif lipase/hydrolase family protein	-	GO:0016787//hydrolase activity;GO:0003824//catalytic activity;GO:0003674//molecular_function	GO:0044699//single-organism process;GO:0006629//lipid metabolic process;GO:0044238//primary metabolic process;GO:0008150//biological_process;GO:0071704//organic substance metabolic process;GO:0008152//metabolic process;GO:0044710//single-organism metabolic process
Bra000057	291.667	86.6667	21.4867	6.20667	-1.79155	0.00171718	0.0206995	yes	-	-	-	-
Bra000058	79.6667	1.33333	8.12667	0.146667	-5.79205	1.81951e-09	1.06846e-07	yes	AT2G38380 (E=6e-160) | peroxidase 22 (PER22) (P22) (PRXEA) / basic peroxidase E	-	GO:0003674//molecular_function;GO:0003824//catalytic activity;GO:0005488//binding	GO:0050896//response to stimulus;GO:0006950//response to stress;GO:0008150//biological_process;GO:0008152//metabolic process
Bra000064	206	55.3333	15.5633	4.15667	-1.90465	0.00427722	0.043027	yes	AT2G38470 (E=4e-154) WRKY33, ATWRKY33 | WRKY33; transcription factor	-	GO:0003674//molecular_function;GO:0005488//binding;GO:0003677//DNA binding;GO:0003700//transcription factor activity, sequence-specific DNA binding;GO:1901363//heterocyclic compound binding;GO:0003676//nucleic acid binding;GO:0001071//nucleic acid binding transcription factor activity;GO:0097159//organic cyclic compound binding	GO:0006807//nitrogen compound metabolic process;GO:0046483//heterocycle metabolic process;GO:0044238//primary metabolic process;GO:0008152//metabolic process;GO:0006725//cellular aromatic compound metabolic process;GO:0009987//cellular process;GO:0071704//organic substance metabolic process;GO:0034641//cellular nitrogen compound metabolic process;GO:0006139//nucleobase-containing compound metabol…
Bra000129	0	4	0.001	0.326667	8.35168	0.00287331	0.03164	yes	-	-	-	-
Bra000132	238.667	81.6667	28.2767	9.78333	-1.53121	7.58587e-10	4.7224e-08	yes	-	-	-	-
Bra000142	15	3.00333	3.26333	0.7	-2.22092	0.00101793	0.0136298	yes	AT2G39700 (E=4e-087) ATEXPA4, ATEXP4, ATHEXP ALPHA 1.6 | ATEXPA4 (ARABIDOPSIS THALIANA EXPANSIN A4)	GO:0005576//extracellular region;GO:0005575//cellular_component	-	GO:0009987//cellular process;GO:0016043//cellular component organization;GO:0008150//biological_process;GO:0071840//cellular component organization or biogenesis
Bra000152	2.66667	16.6667	0.19	1.10667	2.54215	0.00213789	0.0248918	yes	AT2G39830 (E=6e-267) DAR2 | DAR2 (DA1-RELATED PROTEIN 2); zinc ion binding	-	GO:0003674//molecular_function;GO:0005488//binding	-
Bra000223	0.666667	11	0.0633333	1.09667	4.11402	2.9187e-05	0.000681704	yes	AT2G41300 (E=7e-173) | strictosidine synthase	-	GO:0003674//molecular_function;GO:0003824//catalytic activity	GO:0008150//biological_process;GO:0008152//metabolic process;GO:0009058//biosynthetic process
Bra000269	3.66667	0	0.753333	0.001	-9.55714	0.00284205	0.0313513	yes	-	-	-	-
Bra000309	9.87333	31.7967	3.8	12.6833	1.73886	0.000606349	0.00895077	yes	AT2G43520 (E=4e-031) ATTI2 | ATTI2; serine-type endopeptidase inhibitor	GO:0005575//cellular_component;GO:0005576//extracellular region	GO:0003674//molecular_function	GO:0008150//biological_process;GO:0006950//response to stress;GO:0050896//response to stimulus
Bra000311	1284.67	131.333	169.543	18.15	-3.22361	8.40083e-24	2.12165e-21	yes	AT2G43590 (E=3e-127) | chitinase, putative	-	GO:0003824//catalytic activity;GO:0005488//binding;GO:0003674//molecular_function;GO:0016787//hydrolase activity	GO:0008152//metabolic process;GO:0071704//organic substance metabolic process;GO:0008150//biological_process;GO:0009056//catabolic process;GO:0044238//primary metabolic process;GO:0009987//cellular process;GO:0005975//carbohydrate metabolic process
Bra000315	7.66667	0.666667	1.00333	0.0933333	-3.42626	0.000408099	0.00646795	yes	AT2G43620 (E=8e-128) | chitinase, putative	-	GO:0016787//hydrolase activity;GO:0003674//molecular_function;GO:0005488//binding;GO:0003824//catalytic activity	GO:0071704//organic substance metabolic process;GO:0008152//metabolic process;GO:0044238//primary metabolic process;GO:0008150//biological_process;GO:0005975//carbohydrate metabolic process;GO:0009056//catabolic process;GO:0009987//cellular process
Bra000321	6099.22	1590.67	571.05	148.907	-1.93921	3.30593e-08	1.49702e-06	yes	AT2G43710 (E=3e-216) SSI2, FAB2 | SSI2; acyl-[acyl-carrier-protein] desaturase/ stearoyl-CoA 9-desaturase	GO:0043226//organelle;GO:0043231//intracellular membrane-bounded organelle;GO:0009536//plastid;GO:0005623//cell;GO:0005575//cellular_component;GO:0043227//membrane-bounded organelle;GO:0005737//cytoplasm;GO:0044464//cell part;GO:0044424//intracellular part;GO:0044444//cytoplasmic part;GO:0005622//intracellular;GO:0043229//intracellular organelle	GO:0005488//binding;GO:0003824//catalytic activity;GO:0003674//molecular_function	GO:0044238//primary metabolic process;GO:0009058//biosynthetic process;GO:0006629//lipid metabolic process;GO:0071704//organic substance metabolic process;GO:0008152//metabolic process;GO:0044699//single-organism process;GO:0009987//cellular process;GO:0044710//single-organism metabolic process;GO:0008150//biological_process
Bra000340	5.33333	0	1.43	0.001	-10.4818	0.000390517	0.00623383	yes	-	-	-	-
Bra000348	42.6667	17.3333	2.02667	0.833333	-1.28214	0.00331273	0.0354362	yes	-	-	-	-
Bra000377	26.6667	2.66667	7.36667	0.77	-3.25808	2.52226e-07	9.74521e-06	yes	AT2G45180 (E=3e-041) | protease inhibitor/seed storage/lipid transfer protein (LTP) family protein	GO:0005623//cell;GO:0043227//membrane-bounded organelle;GO:0009536//plastid;GO:0009579//thylakoid;GO:0043226//organelle;GO:0044464//cell part;GO:0016020//membrane;GO:0005737//cytoplasm;GO:0044444//cytoplasmic part;GO:0043229//intracellular organelle;GO:0005575//cellular_component;GO:0044424//intracellular part;GO:0043231//intracellular membrane-bounded organelle;GO:0005622//intracellular	-	GO:0044699//single-organism process;GO:0044707//single-multicellular organism process;GO:0044710//single-organism metabolic process;GO:0044238//primary metabolic process;GO:0071704//organic substance metabolic process;GO:0009987//cellular process;GO:0007275//multicellular organism development;GO:0032501//multicellular organismal process;GO:0006629//lipid metabolic process;GO:0044767//single-organ…
Bra000410	97.6667	45	19.04	8.47667	-1.16746	0.000174919	0.00315911	yes	AT2G46030 (E=4e-084) UBC6 | UBC6 (ubiquitin-conjugating enzyme 6); ubiquitin-protein ligase	-	GO:0003674//molecular_function;GO:0003824//catalytic activity	-
Bra000430	8.66667	0.666667	2.65	0.206667	-3.68061	0.000125507	0.00238455	yes	AT2G46600 (E=2e-058) | calcium-binding protein, putative	-	GO:0005488//binding;GO:0003674//molecular_function	-
Bra000460	99.3333	40.6667	16.6867	6.86333	-1.28171	8.60993e-05	0.001739	yes	AT2G47730 (E=1e-102) ATGSTF8, ATGSTF5, GST6, GSTF8 | ATGSTF8 (ARABIDOPSIS THALIANA GLUTATHIONE S-TRANSFERASE PHI 8); glutathione binding / glutathione transferase	-	GO:0005488//binding;GO:0005515//protein binding;GO:0003674//molecular_function	-
Bra000461	220.667	76.6667	11.7367	4.06667	-1.5291	0.00175695	0.0210319	yes	AT4G22100 (E=1e-221) BGLU3 | BGLU3 (BETA GLUCOSIDASE 2); catalytic/ cation binding / hydrolase, hydrolyzing O-glycosyl compounds	GO:0005622//intracellular;GO:0044424//intracellular part;GO:0044464//cell part;GO:0005737//cytoplasm;GO:0005783//endoplasmic reticulum;GO:0043231//intracellular membrane-bounded organelle;GO:0043229//intracellular organelle;GO:0005575//cellular_component;GO:0044444//cytoplasmic part;GO:0016020//membrane;GO:0012505//endomembrane system;GO:0005623//cell;GO:0043227//membrane-bounded organelle;GO:004…	GO:0003674//molecular_function;GO:0003824//catalytic activity;GO:0016740//transferase activity;GO:0016787//hydrolase activity	GO:0071704//organic substance metabolic process;GO:0005975//carbohydrate metabolic process;GO:0008150//biological_process;GO:0044238//primary metabolic process;GO:0008152//metabolic process
Bra000469	380.333	137.667	9.77667	3.66667	-1.41487	2.82573e-07	1.07572e-05	yes	AT2G29940 (E=0.0) PDR3, ATPDR3 | PDR3 (PLEIOTROPIC DRUG RESISTANCE 3); ATPase, coupled to transmembrane movement of substances	GO:0005575//cellular_component;GO:0016020//membrane	GO:0003674//molecular_function;GO:0000166//nucleotide binding;GO:0003824//catalytic activity;GO:1901265//nucleoside phosphate binding;GO:0005488//binding;GO:0036094//small molecule binding;GO:1901363//heterocyclic compound binding;GO:0097159//organic cyclic compound binding;GO:0016787//hydrolase activity	-
Bra000474	555.333	199	88.5167	32.42	-1.44907	1.68155e-05	0.000423647	yes	AT2G29450 (E=7e-115) ATGSTU5, ATGSTU1, AT103-1A | ATGSTU5 (ARABIDOPSIS THALIANA GLUTATHIONE S-TRANSFERASE TAU 5); glutathione binding / glutathione transferase	-	GO:0005488//binding;GO:0003674//molecular_function;GO:0005515//protein binding	-
Bra000476	27	9	3.72	1.16667	-1.67291	0.00283788	0.0313165	yes	AT2G29340 (E=2e-124) | short-chain dehydrogenase/reductase (SDR) family protein	-	GO:0003824//catalytic activity;GO:0003674//molecular_function	GO:0008150//biological_process;GO:0008152//metabolic process
Bra000477	19.6667	3.33333	2.71667	0.43	-2.65943	0.000812541	0.0113902	yes	AT2G29310 (E=5e-131) | tropinone reductase, putative / tropine dehydrogenase, putative	-	GO:0003824//catalytic activity;GO:0003674//molecular_function	GO:0008150//biological_process;GO:0008152//metabolic process
Bra000480	312	137	22.7633	10.0633	-1.1776	3.31519e-07	1.24076e-05	yes	AT2G28840 (E=3e-182) | ankyrin repeat family protein	-	GO:0005488//binding;GO:0003674//molecular_function;GO:0005515//protein binding	-
Bra000511	0.333333	5.66667	0.0333333	0.523333	3.97269	0.00193548	0.0228869	yes	AT2G27430 (E=1e-092) | binding	-	GO:0003674//molecular_function;GO:0005488//binding	-
Bra000523	27.6667	88	4.43667	13.5767	1.61358	2.2669e-05	0.000550792	yes	-	-	-	-
Bra000553	64	20	4.97667	1.59333	-1.64313	0.000186992	0.00334796	yes	AT2G25737 (E=4e-178) | unknown protein	GO:0005575//cellular_component;GO:0016020//membrane	-	-
Bra000615	1683	812	170.923	82.8333	-1.04507	0.000338978	0.00551599	yes	AT5G50260 (E=4e-183) | cysteine proteinase, putative	GO:0005773//vacuole;GO:0044464//cell part;GO:0044444//cytoplasmic part;GO:0044424//intracellular part;GO:0005737//cytoplasm;GO:0043226//organelle;GO:0071944//cell periphery;GO:0043227//membrane-bounded organelle;GO:0030312//external encapsulating structure;GO:0005618//cell wall;GO:0005575//cellular_component;GO:0005623//cell;GO:0043229//intracellular organelle;GO:0043231//intracellular membrane-b…	GO:0003674//molecular_function;GO:0003824//catalytic activity;GO:0016787//hydrolase activity	GO:0030154//cell differentiation;GO:0009791//post-embryonic development;GO:0009987//cellular process;GO:0007275//multicellular organism development;GO:0032502//developmental process;GO:0003006//developmental process involved in reproduction;GO:0009908//flower development;GO:0044702//single organism reproductive process;GO:0048608//reproductive structure development;GO:0008219//cell death;GO:00905…
Bra000628	839.667	134.333	85.1033	13.4	-2.66698	5.01094e-31	2.35848e-28	yes	AT5G50750 (E=2e-209) RGP4 | RGP4 (REVERSIBLY GLYCOSYLATED POLYPEPTIDE 4); transferase, transferring hexosyl groups	GO:0005829//cytosol;GO:0005794//Golgi apparatus;GO:0043231//intracellular membrane-bounded organelle;GO:0005623//cell;GO:0044444//cytoplasmic part;GO:0043226//organelle;GO:0044464//cell part;GO:0005737//cytoplasm;GO:0005622//intracellular;GO:0044424//intracellular part;GO:0043227//membrane-bounded organelle;GO:0012505//endomembrane system;GO:0005575//cellular_component;GO:0043229//intracellular o…	GO:0003824//catalytic activity;GO:0003674//molecular_function	GO:0071704//organic substance metabolic process;GO:0009058//biosynthetic process;GO:0005975//carbohydrate metabolic process;GO:0044238//primary metabolic process;GO:0008150//biological_process;GO:0009987//cellular process;GO:0008152//metabolic process
Bra000631	383	1.66667	53.4	0.226667	-7.88012	4.19465e-80	1.18457e-76	yes	-	-	-	-
Bra000710	47.3333	18.6667	5.64333	2.22	-1.34599	0.000480721	0.00738532	yes	AT4G10380 (E=2e-134) NIP5;1, NLM6, NLM8 | NIP5;1; arsenite transmembrane transporter/ boron transporter/ water channel	GO:0005575//cellular_component;GO:0016020//membrane	GO:0003674//molecular_function;GO:0005215//transporter activity	GO:0006810//transport;GO:0051179//localization;GO:0051234//establishment of localization;GO:0008150//biological_process
Bra000731	300	48.6667	35.92	5.95333	-2.59302	1.28877e-20	2.59963e-18	yes	AT4G11040 (E=1e-122) | protein phosphatase 2C, putative / PP2C, putative	-	GO:0003674//molecular_function;GO:0016787//hydrolase activity;GO:0003824//catalytic activity	GO:0044237//cellular metabolic process;GO:0043170//macromolecule metabolic process;GO:0071704//organic substance metabolic process;GO:0006464//cellular protein modification process;GO:0019538//protein metabolic process;GO:0036211//protein modification process;GO:0044238//primary metabolic process;GO:0044267//cellular protein metabolic process;GO:0043412//macromolecule modification;GO:0009987//cel…
Bra000732	7.66667	0.666667	0.793333	0.0733333	-3.43539	0.00133863	0.0170144	yes	AT4G11050 (E=9e-165) AtGH9C3 | AtGH9C3 (Arabidopsis thaliana glycosyl hydrolase 9C3); carbohydrate binding / catalytic/ hydrolase, hydrolyzing O-glycosyl compounds	-	GO:0003674//molecular_function;GO:0005488//binding;GO:0030246//carbohydrate binding;GO:0016787//hydrolase activity;GO:0003824//catalytic activity	GO:0009987//cellular process;GO:0044238//primary metabolic process;GO:0005975//carbohydrate metabolic process;GO:0008150//biological_process;GO:0008152//metabolic process;GO:0071704//organic substance metabolic process;GO:0009056//catabolic process
Bra000735	90	0	6.36333	0.001	-12.6356	8.95935e-36	5.56627e-33	yes	AT1G64840 (E=4e-113) | F-box family protein	-	GO:0005515//protein binding;GO:0003674//molecular_function;GO:0005488//binding	-
Bra000749	28.3333	6	3.19667	0.666667	-2.26153	0.00513207	0.0495255	yes	AT4G11660 (E=7e-105) AT-HSFB2B, HSFB2B | AT-HSFB2B; transcription factor/ transcription repressor	GO:0044464//cell part;GO:0005575//cellular_component;GO:0044424//intracellular part;GO:0005622//intracellular;GO:0043226//organelle;GO:0043231//intracellular membrane-bounded organelle;GO:0043227//membrane-bounded organelle;GO:0005634//nucleus;GO:0005623//cell;GO:0043229//intracellular organelle	GO:0097159//organic cyclic compound binding;GO:1901363//heterocyclic compound binding;GO:0003674//molecular_function;GO:0003676//nucleic acid binding;GO:0003677//DNA binding;GO:0005488//binding;GO:0003700//transcription factor activity, sequence-specific DNA binding;GO:0001071//nucleic acid binding transcription factor activity	GO:0006725//cellular aromatic compound metabolic process;GO:0050896//response to stimulus;GO:0071704//organic substance metabolic process;GO:0044237//cellular metabolic process;GO:0046483//heterocycle metabolic process;GO:0006139//nucleobase-containing compound metabolic process;GO:0008152//metabolic process;GO:0009058//biosynthetic process;GO:0034641//cellular nitrogen compound metabolic process…
Bra000754	5.66667	0	0.566667	0.001	-9.14636	0.000138814	0.0026008	yes	AT4G11890 (E=2e-136) | protein kinase family protein	-	GO:0005488//binding;GO:0016301//kinase activity;GO:0003824//catalytic activity;GO:1901265//nucleoside phosphate binding;GO:0003674//molecular_function;GO:0016772//transferase activity, transferring phosphorus-containing groups;GO:0097159//organic cyclic compound binding;GO:0016740//transferase activity;GO:1901363//heterocyclic compound binding;GO:0000166//nucleotide binding;GO:0036094//small mole…	GO:0009607//response to biotic stimulus;GO:0023052//signaling;GO:0065007//biological regulation;GO:0006464//cellular protein modification process;GO:0009605//response to external stimulus;GO:0036211//protein modification process;GO:0044260//cellular macromolecule metabolic process;GO:0007165//signal transduction;GO:0044238//primary metabolic process;GO:0006950//response to stress;GO:0050896//resp…
Bra000757	385	168.667	44.09	18.85	-1.22589	3.84291e-07	1.42454e-05	yes	AT4G11960 (E=6e-135) PGRL1B | PGRL1B (PGR5-Like B)	GO:0043231//intracellular membrane-bounded organelle;GO:0005575//cellular_component;GO:0005623//cell;GO:0043229//intracellular organelle;GO:0043227//membrane-bounded organelle;GO:0009579//thylakoid;GO:0009536//plastid;GO:0005622//intracellular;GO:0016020//membrane;GO:0043226//organelle;GO:0044444//cytoplasmic part;GO:0044464//cell part;GO:0005737//cytoplasm;GO:0044424//intracellular part	-	GO:0009056//catabolic process;GO:0015979//photosynthesis;GO:0008150//biological_process;GO:0006091//generation of precursor metabolites and energy;GO:0008152//metabolic process;GO:0009987//cellular process;GO:0044237//cellular metabolic process
Bra000758	92.6667	0.333333	2.68667	0.01	-8.06967	4.88553e-35	2.81044e-32	yes	AT4G12020 (E=2e-189) WRKY19, ATWRKY19, MAPKKK11 | WRKY19; transcription factor	-	GO:0000166//nucleotide binding;GO:0003674//molecular_function;GO:0097159//organic cyclic compound binding;GO:1901265//nucleoside phosphate binding;GO:0036094//small molecule binding;GO:1901363//heterocyclic compound binding;GO:0005515//protein binding;GO:0005488//binding	GO:0006950//response to stress;GO:0008150//biological_process;GO:0050896//response to stimulus
Bra000794	1677.67	651.667	124.427	48.6233	-1.35558	5.08168e-07	1.84413e-05	yes	AT4G04460 (E=5e-247) | aspartyl protease family protein	-	GO:0016787//hydrolase activity;GO:0003674//molecular_function;GO:0003824//catalytic activity	GO:0043170//macromolecule metabolic process;GO:0019538//protein metabolic process;GO:0044238//primary metabolic process;GO:0008150//biological_process;GO:0071704//organic substance metabolic process;GO:0008152//metabolic process;GO:0006629//lipid metabolic process;GO:0044699//single-organism process;GO:0044710//single-organism metabolic process
Bra000825	92	36.6667	10.91	4.40333	-1.30898	2.52439e-05	0.000605074	yes	-	-	-	-
Bra000840	13.3333	3.33333	1.66333	0.41	-2.02038	0.00195783	0.0230984	yes	AT4G03210 (E=4e-157) XTH9 | XTH9 (XYLOGLUCAN ENDOTRANSGLUCOSYLASE/HYDROLASE 9); hydrolase, acting on glycosyl bonds / xyloglucan:xyloglucosyl transferase	GO:0005575//cellular_component;GO:0071944//cell periphery;GO:0005576//extracellular region;GO:0030312//external encapsulating structure;GO:0005623//cell;GO:0005618//cell wall;GO:0044464//cell part	GO:0016787//hydrolase activity;GO:0003824//catalytic activity;GO:0016740//transferase activity;GO:0003674//molecular_function	GO:0071840//cellular component organization or biogenesis;GO:0008152//metabolic process;GO:0071704//organic substance metabolic process;GO:0005975//carbohydrate metabolic process;GO:0016043//cellular component organization;GO:0044238//primary metabolic process;GO:0008150//biological_process;GO:0009987//cellular process
Bra000861	0	5.66667	0.001	1.13	10.1421	0.00389249	0.0399195	yes	-	-	-	-
Bra000875	141	35	23.7633	6.39667	-1.89335	0.000578991	0.00861388	yes	AT2G02930 (E=6e-103) ATGSTF3, GST16 | ATGSTF3 (GLUTATHIONE S-TRANSFERASE F3); glutathione transferase	-	GO:0005488//binding;GO:0005515//protein binding;GO:0003674//molecular_function	-
Bra000876	15	0.666667	2.53667	0.116667	-4.44247	2.37869e-07	9.22492e-06	yes	AT4G02520 (E=6e-095) ATGSTF2, ATPM24.1, ATPM24, GST2 | ATGSTF2 (GLUTATHIONE S-TRANSFERASE PHI 2); glutathione binding / glutathione transferase	-	GO:0005488//binding;GO:0005515//protein binding;GO:0003674//molecular_function	-
Bra000883	18	3.66667	1.06	0.21	-2.3356	0.0012091	0.0156501	yes	AT4G02390 (E=5e-298) APP, PARP1, ATPARP1 | APP (ARABIDOPSIS POLY(ADP-RIBOSE) POLYMERASE); NAD+ ADP-ribosyltransferase/ nucleic acid binding	-	GO:0016740//transferase activity;GO:0003676//nucleic acid binding;GO:0003674//molecular_function;GO:0003824//catalytic activity;GO:0097159//organic cyclic compound binding;GO:0005488//binding;GO:1901363//heterocyclic compound binding	GO:0019538//protein metabolic process;GO:0009058//biosynthetic process;GO:0071704//organic substance metabolic process;GO:0036211//protein modification process;GO:0044238//primary metabolic process;GO:0044260//cellular macromolecule metabolic process;GO:0044267//cellular protein metabolic process;GO:0006464//cellular protein modification process;GO:0005975//carbohydrate metabolic process;GO:00434…
Bra000884	34	6	12.76	2.23333	-2.51436	9.31532e-05	0.00185613	yes	AT4G02380 (E=4e-029) SAG21, AtLEA5 | SAG21 (SENESCENCE-ASSOCIATED GENE 21)	-	-	GO:0050896//response to stimulus;GO:0008150//biological_process;GO:0006950//response to stress
Bra000925	15.3333	1.33333	1.68	0.146667	-3.51785	0.000177563	0.00319944	yes	AT4G01450 (E=4e-104) | nodulin MtN21 family protein	GO:0016020//membrane;GO:0005575//cellular_component	GO:0005215//transporter activity;GO:0003674//molecular_function	GO:0009987//cellular process;GO:0008150//biological_process;GO:0006810//transport;GO:0051234//establishment of localization;GO:0051179//localization
Bra001030	38.6667	17.3333	3.71667	1.65	-1.17154	0.00335581	0.0357493	yes	AT3G02130 (E=6e-170) RPK2, TOAD2 | RPK2 (RECEPTOR-LIKE PROTEIN KINASE 2); ATP binding / kinase/ protein serine/threonine kinase	-	GO:1901363//heterocyclic compound binding;GO:0016301//kinase activity;GO:0003824//catalytic activity;GO:0000166//nucleotide binding;GO:0016772//transferase activity, transferring phosphorus-containing groups;GO:0016740//transferase activity;GO:0003674//molecular_function;GO:0097159//organic cyclic compound binding;GO:1901265//nucleoside phosphate binding;GO:0036094//small molecule binding;GO:0005…	GO:0008150//biological_process;GO:0044237//cellular metabolic process;GO:0036211//protein modification process;GO:0043412//macromolecule modification;GO:0044238//primary metabolic process;GO:0009987//cellular process;GO:0071704//organic substance metabolic process;GO:0044260//cellular macromolecule metabolic process;GO:0044267//cellular protein metabolic process;GO:0043170//macromolecule metaboli…
Bra001071	208.667	97.3333	16.3367	7.58333	-1.10721	0.00163712	0.0199904	yes	AT3G02990 (E=6e-138) ATHSFA1E, HSFA1E | ATHSFA1E; DNA binding / transcription factor	GO:0044464//cell part;GO:0044424//intracellular part;GO:0043229//intracellular organelle;GO:0043231//intracellular membrane-bounded organelle;GO:0043226//organelle;GO:0043227//membrane-bounded organelle;GO:0005575//cellular_component;GO:0005622//intracellular;GO:0005634//nucleus;GO:0005623//cell	GO:0003674//molecular_function;GO:0005488//binding;GO:0003676//nucleic acid binding;GO:1901363//heterocyclic compound binding;GO:0097159//organic cyclic compound binding;GO:0001071//nucleic acid binding transcription factor activity;GO:0003677//DNA binding;GO:0003700//transcription factor activity, sequence-specific DNA binding	GO:0071704//organic substance metabolic process;GO:0009628//response to abiotic stimulus;GO:0006950//response to stress;GO:0034641//cellular nitrogen compound metabolic process;GO:0006139//nucleobase-containing compound metabolic process;GO:0009987//cellular process;GO:0009058//biosynthetic process;GO:0006725//cellular aromatic compound metabolic process;GO:0044237//cellular metabolic process;GO:…
Bra001075	66	135	15.2433	31.12	1.02966	0.00266715	0.0297495	yes	-	-	-	-
Bra001097	498.333	107.333	74.9333	18.1433	-2.04617	0.00197514	0.0232655	yes	AT3G04150 (E=2e-104) | germin-like protein, putative	GO:0005576//extracellular region;GO:0005575//cellular_component	GO:0003674//molecular_function;GO:0005488//binding	-
Bra001099	250.667	41	63.8267	10.4667	-2.60836	1.01604e-17	1.5548e-15	yes	AT3G04280 (E=1e-051) ARR22 | ARR22 (ARABIDOPSIS RESPONSE REGULATOR 22); phosphohistidine phosphatase/ transcription regulator/ two-component response regulator	-	GO:0003674//molecular_function;GO:0004871//signal transducer activity	GO:0071704//organic substance metabolic process;GO:0034641//cellular nitrogen compound metabolic process;GO:0023052//signaling;GO:0008150//biological_process;GO:0006139//nucleobase-containing compound metabolic process;GO:0050789//regulation of biological process;GO:0006725//cellular aromatic compound metabolic process;GO:0044238//primary metabolic process;GO:0050896//response to stimulus;GO:0044…
Bra001122	9	1	2.31	0.273333	-3.07916	0.000234053	0.00405275	yes	AT3G04720 (E=1e-051) PR4, HEL, PR-4 | PR4 (PATHOGENESIS-RELATED 4); chitin binding	-	-	GO:0009605//response to external stimulus;GO:0050896//response to stimulus;GO:0006950//response to stress;GO:0008150//biological_process;GO:0009607//response to biotic stimulus
Bra001123	443	182	74.4633	31.0367	-1.26256	1.02495e-07	4.2283e-06	yes	AT3G04720 (E=2e-097) PR4, HEL, PR-4 | PR4 (PATHOGENESIS-RELATED 4); chitin binding	-	GO:0005488//binding;GO:0016787//hydrolase activity;GO:0004518//nuclease activity;GO:0016788//hydrolase activity, acting on ester bonds;GO:0003824//catalytic activity;GO:0003674//molecular_function	GO:0009607//response to biotic stimulus;GO:0044237//cellular metabolic process;GO:0006139//nucleobase-containing compound metabolic process;GO:0006810//transport;GO:0046483//heterocycle metabolic process;GO:0006950//response to stress;GO:0050896//response to stimulus;GO:0009605//response to external stimulus;GO:0034641//cellular nitrogen compound metabolic process;GO:0006725//cellular aromatic co…
Bra001143	21.3333	81	2.73667	9.91333	1.85695	0.000262588	0.00446471	yes	AT3G05280 (E=8e-149) | integral membrane Yip1 family protein	GO:0005575//cellular_component;GO:0016020//membrane	-	-
Bra001144	52.3333	153.333	5.86333	16.3133	1.47626	0.000720839	0.0103476	yes	AT3G05290 (E=3e-138) PNC1 | PNC1 (PEROXISOMAL ADENINE NUCLEOTIDE CARRIER 1); ADP transmembrane transporter/ ATP transmembrane transporter/ binding	GO:0042579//microbody;GO:0044464//cell part;GO:0005575//cellular_component;GO:0016020//membrane;GO:0005623//cell;GO:0043227//membrane-bounded organelle;GO:0043229//intracellular organelle;GO:0043231//intracellular membrane-bounded organelle;GO:0005777//peroxisome;GO:0044424//intracellular part;GO:0043226//organelle;GO:0005737//cytoplasm;GO:0005622//intracellular;GO:0044444//cytoplasmic part	GO:0003674//molecular_function;GO:0005215//transporter activity	GO:0019748//secondary metabolic process;GO:0071704//organic substance metabolic process;GO:0009056//catabolic process;GO:0044707//single-multicellular organism process;GO:0007275//multicellular organism development;GO:0050896//response to stimulus;GO:0006629//lipid metabolic process;GO:0044238//primary metabolic process;GO:0008150//biological_process;GO:0044767//single-organism developmental proc…
Bra001155	42.3333	17	4.83667	1.98	-1.28851	0.000813687	0.0113909	yes	AT3G05580 (E=2e-177) | serine/threonine protein phosphatase, putative	-	GO:0003674//molecular_function;GO:0016787//hydrolase activity;GO:0003824//catalytic activity	GO:0008150//biological_process;GO:0043412//macromolecule modification;GO:0071704//organic substance metabolic process;GO:0044260//cellular macromolecule metabolic process;GO:0006464//cellular protein modification process;GO:0019538//protein metabolic process;GO:0009987//cellular process;GO:0036211//protein modification process;GO:0044237//cellular metabolic process;GO:0044267//cellular protein me…
Bra001184	3	16.3333	0.236667	1.22	2.36595	0.000167748	0.00305503	yes	AT3G06130 (E=2e-045) | heavy-metal-associated domain-containing protein	-	GO:0003674//molecular_function;GO:0005488//binding	GO:0006810//transport;GO:0051234//establishment of localization;GO:0008150//biological_process;GO:0051179//localization
Bra001202	36.6667	6	4.37667	0.733333	-2.57729	2.21637e-08	1.03162e-06	yes	AT3G06490 (E=4e-133) MYB108, AtMYB108, BOS1 | MYB108 (myb domain protein 108); DNA binding / transcription factor	-	GO:1901363//heterocyclic compound binding;GO:0005488//binding;GO:0003682//chromatin binding;GO:0097159//organic cyclic compound binding;GO:0003676//nucleic acid binding;GO:0003674//molecular_function;GO:0003677//DNA binding;GO:0044877//macromolecular complex binding	-
Bra001211	7	19	0.73	1.96	1.42489	0.00454188	0.045062	yes	AT3G06660 (E=1e-051) | PAPA-1-like family protein / zinc finger (HIT type) family protein	GO:0043231//intracellular membrane-bounded organelle;GO:0005575//cellular_component;GO:0043226//organelle;GO:0043227//membrane-bounded organelle;GO:0044424//intracellular part;GO:0043229//intracellular organelle;GO:0005623//cell;GO:0044464//cell part;GO:0005634//nucleus;GO:0005622//intracellular	-	GO:0009058//biosynthetic process;GO:0006807//nitrogen compound metabolic process;GO:0008152//metabolic process;GO:0006725//cellular aromatic compound metabolic process;GO:0034641//cellular nitrogen compound metabolic process;GO:0044238//primary metabolic process;GO:0009987//cellular process;GO:0071840//cellular component organization or biogenesis;GO:0006139//nucleobase-containing compound metabo…
Bra001249	25	6.33333	3.49333	0.88	-1.98903	0.000196526	0.0034925	yes	-	-	-	-
Bra001256	20.0033	2.40333	1.91333	0.24	-2.99498	0.00125211	0.0160924	yes	AT3G07540 (E=1e-116) | formin homology 2 domain-containing protein / FH2 domain-containing protein	GO:0005623//cell;GO:0043228//non-membrane-bounded organelle;GO:0044464//cell part;GO:0043229//intracellular organelle;GO:0005622//intracellular;GO:0044424//intracellular part;GO:0043232//intracellular non-membrane-bounded organelle;GO:0043226//organelle;GO:0005575//cellular_component;GO:0005856//cytoskeleton	-	GO:0071840//cellular component organization or biogenesis;GO:0016043//cellular component organization;GO:0009987//cellular process;GO:0008150//biological_process
Bra001308	2	10	0.0966667	0.516667	2.41814	0.00378455	0.0392008	yes	AT5G02400 (E=1e-208) PLL2 | PLL2; catalytic/ protein serine/threonine phosphatase	-	GO:0003824//catalytic activity;GO:0016787//hydrolase activity;GO:0003674//molecular_function	GO:0044267//cellular protein metabolic process;GO:0071704//organic substance metabolic process;GO:0044238//primary metabolic process;GO:0006464//cellular protein modification process;GO:0019538//protein metabolic process;GO:0036211//protein modification process;GO:0008150//biological_process;GO:0043412//macromolecule modification;GO:0008152//metabolic process;GO:0044260//cellular macromolecule me…
Bra001320	24	1.66667	1.59333	0.126667	-3.65294	9.63787e-05	0.00190856	yes	AT3G09260 (E=5e-296) PYK10, PSR3.1, BGLU23 | PYK10; beta-glucosidase/ copper ion binding / fucosidase/ hydrolase, hydrolyzing O-glycosyl compounds	-	GO:0003824//catalytic activity;GO:0016787//hydrolase activity;GO:0003674//molecular_function	GO:0071704//organic substance metabolic process;GO:0008152//metabolic process;GO:0008150//biological_process;GO:0005975//carbohydrate metabolic process;GO:0044238//primary metabolic process
Bra001322	1.33333	15	0.1	1.09333	3.45066	1.82066e-06	5.81265e-05	yes	AT3G09240 (E=5e-225) | protein kinase-related	-	GO:1901363//heterocyclic compound binding;GO:0016740//transferase activity;GO:0000166//nucleotide binding;GO:0005488//binding;GO:0097159//organic cyclic compound binding;GO:0016301//kinase activity;GO:0003674//molecular_function;GO:0016772//transferase activity, transferring phosphorus-containing groups;GO:0003824//catalytic activity;GO:0036094//small molecule binding;GO:0005515//protein binding;…	GO:0009987//cellular process;GO:0006464//cellular protein modification process;GO:0044238//primary metabolic process;GO:0008152//metabolic process;GO:0071704//organic substance metabolic process;GO:0019538//protein metabolic process;GO:0044267//cellular protein metabolic process;GO:0043412//macromolecule modification;GO:0044260//cellular macromolecule metabolic process;GO:0036211//protein modific…
Bra001324	1041	470	116.01	52.67	-1.1392	5.99184e-09	3.22025e-07	yes	AT3G09200 (E=7e-147) | 60S acidic ribosomal protein P0 (RPP0B)	GO:0005575//cellular_component;GO:0005840//ribosome;GO:0044444//cytoplasmic part;GO:0043232//intracellular non-membrane-bounded organelle;GO:0044424//intracellular part;GO:0005737//cytoplasm;GO:0043226//organelle;GO:0005622//intracellular;GO:0043228//non-membrane-bounded organelle;GO:0032991//macromolecular complex;GO:0030529//intracellular ribonucleoprotein complex;GO:0043229//intracellular orga…	GO:0005198//structural molecule activity;GO:0003674//molecular_function	GO:0006412//translation;GO:0009059//macromolecule biosynthetic process;GO:1901576//organic substance biosynthetic process;GO:0019538//protein metabolic process;GO:1901566//organonitrogen compound biosynthetic process;GO:0006807//nitrogen compound metabolic process;GO:0043170//macromolecule metabolic process;GO:0044267//cellular protein metabolic process;GO:0010467//gene expression;GO:0044260//cel…
Bra001325	30.3333	11.6667	3.39	1.29667	-1.38648	0.00323328	0.0347659	yes	AT3G09150 (E=1e-157) HY2, GUN3 | HY2 (ELONGATED HYPOCOTYL 2); phytochromobilin:ferredoxin oxidoreductase	-	GO:0003824//catalytic activity;GO:0003674//molecular_function;GO:0005488//binding	GO:0008152//metabolic process;GO:0008150//biological_process;GO:0009987//cellular process;GO:0009058//biosynthetic process
Bra001332	18.3333	4	1.95333	0.406667	-2.26402	0.000810937	0.011378	yes	AT3G09190 (E=3e-110) | sugar binding	-	GO:0003674//molecular_function;GO:0005488//binding;GO:0030246//carbohydrate binding	-
Bra001333	18	4	1.68667	0.406667	-2.05226	0.00183486	0.0218468	yes	AT3G09010 (E=2e-162) | protein kinase family protein	-	GO:0005488//binding;GO:0036094//small molecule binding;GO:0016301//kinase activity;GO:0003674//molecular_function;GO:1901265//nucleoside phosphate binding;GO:1901363//heterocyclic compound binding;GO:0097159//organic cyclic compound binding;GO:0003824//catalytic activity;GO:0016772//transferase activity, transferring phosphorus-containing groups;GO:0016740//transferase activity;GO:0000166//nucleo…	GO:0044260//cellular macromolecule metabolic process;GO:0036211//protein modification process;GO:0019538//protein metabolic process;GO:0006464//cellular protein modification process;GO:0008152//metabolic process;GO:0071704//organic substance metabolic process;GO:0044267//cellular protein metabolic process;GO:0043170//macromolecule metabolic process;GO:0008150//biological_process;GO:0043412//macro…
Bra001335	24	7.66667	2.81	0.893333	-1.6533	0.00469536	0.0462597	yes	AT3G08950 (E=3e-148) | electron transport SCO1/SenC family protein	GO:0043229//intracellular organelle;GO:0016020//membrane;GO:0005737//cytoplasm;GO:0043226//organelle;GO:0044444//cytoplasmic part;GO:0005623//cell;GO:0005575//cellular_component;GO:0043231//intracellular membrane-bounded organelle;GO:0005622//intracellular;GO:0044424//intracellular part;GO:0043227//membrane-bounded organelle;GO:0005739//mitochondrion;GO:0044464//cell part	GO:0003674//molecular_function;GO:0005488//binding	GO:0044763//single-organism cellular process;GO:0006810//transport;GO:0065008//regulation of biological quality;GO:0019725//cellular homeostasis;GO:0042592//homeostatic process;GO:0071840//cellular component organization or biogenesis;GO:0065007//biological regulation;GO:0009987//cellular process;GO:0044699//single-organism process;GO:0016043//cellular component organization;GO:0051179//localizat…
Bra001345	232	56	74.6	18.2033	-2.03497	4.37592e-08	1.93638e-06	yes	AT3G08770 (E=2e-033) LTP6 | LTP6; lipid binding	-	GO:0003674//molecular_function;GO:0005488//binding;GO:0008289//lipid binding	GO:0051234//establishment of localization;GO:0008150//biological_process;GO:0006810//transport;GO:0051179//localization
Bra001349	13.6667	1.66667	0.88	0.106667	-3.04439	0.000239156	0.00412959	yes	AT3G08660 (E=3e-231) | phototropic-responsive protein, putative	-	GO:0005515//protein binding;GO:0005488//binding;GO:0003674//molecular_function	-
Bra001392	84.6667	22.3333	7.21333	1.87333	-1.94506	3.37431e-09	1.90235e-07	yes	AT3G11170 (E=2e-220) FAD7, FADD | FAD7 (FATTY ACID DESATURASE 7); omega-3 fatty acid desaturase	-	GO:0003674//molecular_function;GO:0003824//catalytic activity	GO:0008150//biological_process;GO:0044238//primary metabolic process;GO:0044699//single-organism process;GO:0044710//single-organism metabolic process;GO:0008152//metabolic process;GO:0071704//organic substance metabolic process;GO:0006629//lipid metabolic process
Bra001440	139.667	341.667	12.2067	29.1867	1.25764	4.47674e-06	0.000128408	yes	AT3G12240 (E=6e-160) SCPL15 | SCPL15 (serine carboxypeptidase-like 15); serine-type carboxypeptidase	-	GO:0003824//catalytic activity;GO:0003674//molecular_function;GO:0016787//hydrolase activity	GO:0019538//protein metabolic process;GO:0071704//organic substance metabolic process;GO:0044238//primary metabolic process;GO:0008150//biological_process;GO:0008152//metabolic process;GO:0043170//macromolecule metabolic process
Bra001457	1360.67	231.667	83.1967	14.3833	-2.53213	0.000505964	0.00772347	yes	AT3G12580 (E=2e-260) HSP70 | HSP70 (heat shock protein 70); ATP binding	-	GO:0036094//small molecule binding;GO:0003674//molecular_function;GO:0000166//nucleotide binding;GO:1901265//nucleoside phosphate binding;GO:1901363//heterocyclic compound binding;GO:0097159//organic cyclic compound binding;GO:0005488//binding	-
Bra001466	8.33333	1	0.7	0.0933333	-2.90689	0.00311501	0.0337277	yes	AT3G12700 (E=3e-182) | aspartyl protease family protein	-	GO:0016787//hydrolase activity;GO:0003674//molecular_function;GO:0003824//catalytic activity	GO:0019538//protein metabolic process;GO:0043170//macromolecule metabolic process;GO:0044238//primary metabolic process;GO:0008150//biological_process;GO:0008152//metabolic process;GO:0071704//organic substance metabolic process
Bra001480	13.6667	2	1.75	0.276667	-2.66113	0.000329782	0.00538893	yes	AT3G12977 (E=3e-118) | DNA binding	GO:0005634//nucleus;GO:0005575//cellular_component;GO:0043229//intracellular organelle;GO:0043227//membrane-bounded organelle;GO:0005622//intracellular;GO:0043226//organelle;GO:0044464//cell part;GO:0044424//intracellular part;GO:0043231//intracellular membrane-bounded organelle;GO:0005623//cell	GO:0003676//nucleic acid binding;GO:0003674//molecular_function;GO:0005488//binding;GO:1901363//heterocyclic compound binding;GO:0003677//DNA binding;GO:0097159//organic cyclic compound binding	GO:0071704//organic substance metabolic process;GO:0009058//biosynthetic process;GO:0034641//cellular nitrogen compound metabolic process;GO:0006807//nitrogen compound metabolic process;GO:1901360//organic cyclic compound metabolic process;GO:0006139//nucleobase-containing compound metabolic process;GO:0009987//cellular process;GO:0008152//metabolic process;GO:0008150//biological_process;GO:00067…
Bra001516	11.3333	0.666667	2.16667	0.14	-3.95198	0.00043826	0.00684126	yes	-	-	-	-
Bra001528	10.5067	1.97333	3.68	0.683333	-2.42904	0.00113322	0.0148659	yes	AT3G13882 (E=4e-034) | structural constituent of ribosome	GO:0043229//intracellular organelle;GO:0044424//intracellular part;GO:0005623//cell;GO:0043228//non-membrane-bounded organelle;GO:1990904//ribonucleoprotein complex;GO:0030529//intracellular ribonucleoprotein complex;GO:0043232//intracellular non-membrane-bounded organelle;GO:0005840//ribosome;GO:0005737//cytoplasm;GO:0005622//intracellular;GO:0044464//cell part;GO:0043226//organelle;GO:0044444//…	GO:0005198//structural molecule activity;GO:0003674//molecular_function	GO:0006518//peptide metabolic process;GO:0008152//metabolic process;GO:0071704//organic substance metabolic process;GO:0034641//cellular nitrogen compound metabolic process;GO:0006412//translation;GO:0008150//biological_process;GO:1901564//organonitrogen compound metabolic process;GO:0010467//gene expression;GO:0043604//amide biosynthetic process;GO:0043603//cellular amide metabolic process;GO:00…
Bra001550	146.333	61.3333	14.4333	6.11667	-1.23859	1.7413e-05	0.000437282	yes	AT3G14415 (E=2e-189) | (S)-2-hydroxy-acid oxidase, peroxisomal, putative / glycolate oxidase, putative / short chain alpha-hydroxy acid oxidase, putative	-	GO:0003824//catalytic activity;GO:1901265//nucleoside phosphate binding;GO:0005488//binding;GO:0003674//molecular_function;GO:0097159//organic cyclic compound binding;GO:0036094//small molecule binding;GO:1901363//heterocyclic compound binding;GO:0000166//nucleotide binding	GO:0008152//metabolic process;GO:0008150//biological_process
Bra001565	12.6667	3	0.556667	0.12	-2.21378	0.00343974	0.0364783	yes	AT3G14810 (E=0.0) MSL5 | MSL5 (MECHANOSENSITIVE CHANNEL OF SMALL CONDUCTANCE-LIKE 5)	GO:0005575//cellular_component;GO:0016020//membrane	-	GO:0006810//transport;GO:0009987//cellular process;GO:0051234//establishment of localization;GO:0051179//localization;GO:0008150//biological_process
Bra001578	90.3333	283.333	8.72333	27.49	1.65596	5.93301e-13	5.63618e-11	yes	-	-	-	-
Bra001580	6.33333	21.6667	0.963333	3.48	1.85298	0.00347565	0.0366988	yes	-	-	-	-
Bra001592	0	13.3333	0.001	2.97333	11.5379	8.8144e-09	4.55592e-07	yes	AT3G15360 (E=9e-057) ATHM4, TRX-M4, ATM4 | TRX-M4 (ARABIDOPSIS THIOREDOXIN M-TYPE 4); enzyme activator	-	GO:0003824//catalytic activity;GO:0003674//molecular_function	GO:0044699//single-organism process;GO:0044763//single-organism cellular process;GO:0019725//cellular homeostasis;GO:0008152//metabolic process;GO:0042592//homeostatic process;GO:0065008//regulation of biological quality;GO:0009987//cellular process;GO:0065007//biological regulation;GO:0008150//biological_process
Bra001599	4	173	0.336667	14.38	5.4166	6.48592e-37	4.4773e-34	yes	-	-	-	-
Bra001606	95.6667	44.3333	16.3033	7.59333	-1.10236	0.000286151	0.00480487	yes	-	-	-	-
Bra001607	72.3333	29	9.57333	3.83667	-1.31917	0.000972258	0.0131543	yes	-	-	-	-
Bra001614	20.6667	7.66667	2.15333	0.8	-1.4285	0.00401581	0.0408605	yes	AT3G15890 (E=1e-123) | protein kinase family protein	-	GO:0000166//nucleotide binding;GO:1901265//nucleoside phosphate binding;GO:0005488//binding;GO:0016740//transferase activity;GO:0097159//organic cyclic compound binding;GO:1901363//heterocyclic compound binding;GO:0003674//molecular_function;GO:0016301//kinase activity;GO:0003824//catalytic activity;GO:0016772//transferase activity, transferring phosphorus-containing groups;GO:0036094//small mole…	GO:0043412//macromolecule modification;GO:0019538//protein metabolic process;GO:0044238//primary metabolic process;GO:0036211//protein modification process;GO:0044260//cellular macromolecule metabolic process;GO:0071704//organic substance metabolic process;GO:0044267//cellular protein metabolic process;GO:0009987//cellular process;GO:0008150//biological_process;GO:0006464//cellular protein modifi…
Bra001617	14.81	58	0.853333	3.16333	1.89026	1.0881e-05	0.000284518	yes	AT3G15990 (E=0.0) SULTR3;4 | SULTR3;4 (SULFATE TRANSPORTER 3;4); sulfate transmembrane transporter	GO:0005575//cellular_component;GO:0016020//membrane	GO:0005215//transporter activity;GO:0003674//molecular_function	GO:0009987//cellular process;GO:0051234//establishment of localization;GO:0008150//biological_process;GO:0051179//localization;GO:0006810//transport
Bra001624	0	17.3333	0.001	2.33	11.1861	2.57585e-10	1.71341e-08	yes	AT1G52300 (E=6e-049) | 60S ribosomal protein L37 (RPL37B)	GO:0030529//intracellular ribonucleoprotein complex;GO:0043226//organelle;GO:0005622//intracellular;GO:0044424//intracellular part;GO:0005737//cytoplasm;GO:0044444//cytoplasmic part;GO:0005575//cellular_component;GO:0005623//cell;GO:0043228//non-membrane-bounded organelle;GO:0032991//macromolecular complex;GO:0044464//cell part;GO:0043229//intracellular organelle;GO:1990904//ribonucleoprotein com…	GO:0005198//structural molecule activity;GO:0003674//molecular_function	GO:1901566//organonitrogen compound biosynthetic process;GO:0071704//organic substance metabolic process;GO:0008150//biological_process;GO:1901576//organic substance biosynthetic process;GO:1901564//organonitrogen compound metabolic process;GO:0006807//nitrogen compound metabolic process;GO:0006518//peptide metabolic process;GO:0009059//macromolecule biosynthetic process;GO:0019538//protein metab…
Bra001665	74	199.333	6.15333	16.2467	1.4007	2.95817e-07	1.11656e-05	yes	AT3G17510 (E=3e-221) CIPK1, SnRK3.16 | CIPK1 (CBL-INTERACTING PROTEIN KINASE 1); kinase/ protein binding	-	GO:1901363//heterocyclic compound binding;GO:0003824//catalytic activity;GO:0016772//transferase activity, transferring phosphorus-containing groups;GO:0005488//binding;GO:0097159//organic cyclic compound binding;GO:0000166//nucleotide binding;GO:0036094//small molecule binding;GO:0016301//kinase activity;GO:0016740//transferase activity;GO:0003674//molecular_function;GO:1901265//nucleoside phosp…	GO:0006464//cellular protein modification process;GO:0044238//primary metabolic process;GO:0019538//protein metabolic process;GO:0044699//single-organism process;GO:0050896//response to stimulus;GO:0043170//macromolecule metabolic process;GO:0044267//cellular protein metabolic process;GO:0007165//signal transduction;GO:0043412//macromolecule modification;GO:0008152//metabolic process;GO:0008150//…
Bra001687	31.6667	3.33333	2.29667	0.253333	-3.18043	2.83838e-09	1.61191e-07	yes	AT2G04920 (E=5e-056) | F-box family protein (FBX9)	-	GO:0005515//protein binding;GO:0003674//molecular_function;GO:0005488//binding	-
Bra001703	21.6667	4	3.12333	0.62	-2.33275	0.000230795	0.00400751	yes	-	-	-	-
Bra001722	34.9867	13.3333	8.61667	3.27667	-1.3949	0.00252485	0.0285104	yes	-	-	-	-
Bra001725	60.3333	20.3333	4.06	1.39	-1.54639	1.75563e-05	0.000440525	yes	AT3G18830 (E=4e-253) ATPLT5 | ATPLT5 (POLYOL TRANSPORTER 5); D-ribose transmembrane transporter/ D-xylose transmembrane transporter/ carbohydrate transmembrane transporter/ galactose transmembrane transporter/ glucose transmembrane transporter/ glycerol transmembrane transporter/ mann	GO:0016020//membrane;GO:0005623//cell;GO:0044464//cell part;GO:0005886//plasma membrane;GO:0071944//cell periphery;GO:0005575//cellular_component	GO:0003674//molecular_function;GO:0005215//transporter activity	GO:0007275//multicellular organism development;GO:0008150//biological_process;GO:0044699//single-organism process;GO:0044707//single-multicellular organism process;GO:0051234//establishment of localization;GO:0009791//post-embryonic development;GO:0032502//developmental process;GO:0044767//single-organism developmental process;GO:0009653//anatomical structure morphogenesis;GO:0051179//localizatio…
Bra001747	18.3333	6.66667	1.12333	0.396667	-1.50179	0.00277054	0.0306934	yes	AT3G19480 (E=5e-283) | D-3-phosphoglycerate dehydrogenase, putative / 3-PGDH, putative	GO:0044464//cell part;GO:0043229//intracellular organelle;GO:0009536//plastid;GO:0005575//cellular_component;GO:0043226//organelle;GO:0044444//cytoplasmic part;GO:0005622//intracellular;GO:0044424//intracellular part;GO:0005737//cytoplasm;GO:0043231//intracellular membrane-bounded organelle;GO:0043227//membrane-bounded organelle;GO:0005623//cell;GO:0005739//mitochondrion	GO:0036094//small molecule binding;GO:0097159//organic cyclic compound binding;GO:1901363//heterocyclic compound binding;GO:1901265//nucleoside phosphate binding;GO:0003824//catalytic activity;GO:0003674//molecular_function;GO:0000166//nucleotide binding;GO:0005488//binding	GO:0008152//metabolic process;GO:0009058//biosynthetic process;GO:0008150//biological_process;GO:0009987//cellular process
Bra001757	64	164	6.33	16.07	1.34409	2.24921e-07	8.76657e-06	yes	AT3G19630 (E=4e-182) | radical SAM domain-containing protein	GO:0005623//cell;GO:0005575//cellular_component;GO:0044464//cell part;GO:0005622//intracellular;GO:0044424//intracellular part;GO:0005737//cytoplasm	GO:0003674//molecular_function;GO:0016740//transferase activity;GO:0003824//catalytic activity;GO:0005488//binding	GO:0007049//cell cycle;GO:0008152//metabolic process;GO:0006139//nucleobase-containing compound metabolic process;GO:0008150//biological_process;GO:1901360//organic cyclic compound metabolic process;GO:0006725//cellular aromatic compound metabolic process;GO:0006807//nitrogen compound metabolic process;GO:0044238//primary metabolic process;GO:0046483//heterocycle metabolic process;GO:0071704//org…
Bra001782	100.333	28.6667	8.80667	2.52	-1.80517	2.13855e-05	0.000523497	yes	AT3G20260 (E=3e-153) | structural constituent of ribosome	GO:0044424//intracellular part;GO:0043229//intracellular organelle;GO:0032991//macromolecular complex;GO:0005575//cellular_component;GO:0044464//cell part;GO:0005623//cell;GO:0044444//cytoplasmic part;GO:0005737//cytoplasm;GO:0005840//ribosome;GO:0043226//organelle;GO:0005622//intracellular;GO:0043228//non-membrane-bounded organelle;GO:0043232//intracellular non-membrane-bounded organelle;GO:1990…	GO:0003674//molecular_function;GO:0005198//structural molecule activity	GO:0006412//translation;GO:0044267//cellular protein metabolic process;GO:0019538//protein metabolic process;GO:0044237//cellular metabolic process;GO:0043604//amide biosynthetic process;GO:0044271//cellular nitrogen compound biosynthetic process;GO:0034641//cellular nitrogen compound metabolic process;GO:1901564//organonitrogen compound metabolic process;GO:0010467//gene expression;GO:1901566//o…
Bra001783	0.333333	10.6667	0.0266667	0.92	5.10852	0.000498558	0.00762916	yes	-	-	-	-
Bra001811	3.66667	85	0.323333	7.35	4.50665	1.57381e-22	3.73198e-20	yes	AT3G21110 (E=6e-216) PUR7, PURC, ATPURC | PUR7 (PURIN 7); phosphoribosylaminoimidazolesuccinocarboxamide synthase	-	GO:0003674//molecular_function;GO:0036094//small molecule binding;GO:0003824//catalytic activity;GO:0097159//organic cyclic compound binding;GO:0005488//binding;GO:0000166//nucleotide binding;GO:1901363//heterocyclic compound binding;GO:1901265//nucleoside phosphate binding	GO:0046483//heterocycle metabolic process;GO:0006807//nitrogen compound metabolic process;GO:0044238//primary metabolic process;GO:0009987//cellular process;GO:0044237//cellular metabolic process;GO:0034641//cellular nitrogen compound metabolic process;GO:0009058//biosynthetic process;GO:0006725//cellular aromatic compound metabolic process;GO:0006139//nucleobase-containing compound metabolic pro…
Bra001814	10.3333	62.3333	0.94	5.90667	2.65161	2.17085e-08	1.01866e-06	yes	AT3G21140 (E=2e-167) | FMN binding	-	GO:0000166//nucleotide binding;GO:0003824//catalytic activity;GO:0003674//molecular_function;GO:0097159//organic cyclic compound binding;GO:0005488//binding;GO:1901363//heterocyclic compound binding;GO:1901265//nucleoside phosphate binding;GO:0036094//small molecule binding	GO:0008152//metabolic process;GO:0008150//biological_process
Bra001816	81	17.6667	5.15	1.11333	-2.20969	2.89447e-11	2.19062e-09	yes	AT3G21160 (E=2e-285) | mannosyl-oligosaccharide 1,2-alpha-mannosidase, putative	GO:0016020//membrane;GO:0005575//cellular_component	GO:0005488//binding;GO:0016787//hydrolase activity;GO:0003824//catalytic activity;GO:0003674//molecular_function	-
Bra001818	81.3333	33	8.66333	3.63	-1.25495	0.00111393	0.0146873	yes	AT3G21220 (E=1e-162) ATMKK5, ATMAP2K_ALPHA, MAP2K_A, MKK5, ATMEK5, MEK5 | ATMKK5 (ARABIDOPSIS THALIANA MITOGEN-ACTIVATED PROTEIN KINASE KINASE 5); MAP kinase kinase/ kinase	-	GO:0016301//kinase activity;GO:0036094//small molecule binding;GO:1901363//heterocyclic compound binding;GO:0016740//transferase activity;GO:1901265//nucleoside phosphate binding;GO:0003824//catalytic activity;GO:0000166//nucleotide binding;GO:0005488//binding;GO:0097159//organic cyclic compound binding;GO:0003674//molecular_function;GO:0016772//transferase activity, transferring phosphorus-conta…	GO:0043412//macromolecule modification;GO:0044237//cellular metabolic process;GO:0008150//biological_process;GO:0044267//cellular protein metabolic process;GO:0009987//cellular process;GO:0044260//cellular macromolecule metabolic process;GO:0019538//protein metabolic process;GO:0044238//primary metabolic process;GO:0006464//cellular protein modification process;GO:0071704//organic substance metab…
Bra001820	17	47.3333	1.06667	3.01333	1.49825	0.000614054	0.00904456	yes	AT3G21230 (E=2e-132) 4CL5 | 4CL5 (4-coumarate:CoA ligase 5); 4-coumarate-CoA ligase	-	GO:0003674//molecular_function;GO:0003824//catalytic activity	GO:0008150//biological_process;GO:0008152//metabolic process
Bra001825	17	2.66667	1.21333	0.176667	-2.77987	0.000111098	0.00215561	yes	-	-	-	-
Bra001832	0.333333	6.66667	0.0166667	0.4	4.58496	0.000897429	0.0123353	yes	AT4G15560 (E=1e-220) CLA1, DEF, CLA, DXS, DXPS2 | CLA1 (CLOROPLASTOS ALTERADOS 1); 1-deoxy-D-xylulose-5-phosphate synthase	GO:0044424//intracellular part;GO:0044444//cytoplasmic part;GO:0005737//cytoplasm;GO:0005575//cellular_component;GO:0044464//cell part;GO:0043226//organelle;GO:0005622//intracellular;GO:0009536//plastid;GO:0043231//intracellular membrane-bounded organelle;GO:0005623//cell;GO:0043229//intracellular organelle;GO:0043227//membrane-bounded organelle	GO:0016740//transferase activity;GO:0003674//molecular_function;GO:0003824//catalytic activity	GO:0009987//cellular process;GO:0009058//biosynthetic process;GO:0044710//single-organism metabolic process;GO:0044238//primary metabolic process;GO:0008152//metabolic process;GO:0071704//organic substance metabolic process;GO:0008150//biological_process;GO:0006629//lipid metabolic process;GO:0044699//single-organism process
Bra001842	136.333	56.6667	23.1467	9.56333	-1.27522	4.58817e-06	0.000130639	yes	-	-	-	-
Bra001845	201	74.3333	14.7833	5.45667	-1.43788	7.84556e-09	4.13777e-07	yes	AT3G21760 (E=1e-224) | UDP-glucoronosyl/UDP-glucosyl transferase family protein	-	GO:0003674//molecular_function;GO:0003824//catalytic activity;GO:0016740//transferase activity	GO:0008150//biological_process;GO:0008152//metabolic process
Bra001882	200.333	35.6667	44.3833	8.08667	-2.4564	1.35494e-18	2.22698e-16	yes	AT3G22680 (E=6e-068) | unknown protein	GO:0005575//cellular_component;GO:0043227//membrane-bounded organelle;GO:0005623//cell;GO:0005622//intracellular;GO:0044464//cell part;GO:0043229//intracellular organelle;GO:0005634//nucleus;GO:0043231//intracellular membrane-bounded organelle;GO:0044424//intracellular part;GO:0043226//organelle	-	GO:0044237//cellular metabolic process;GO:0006807//nitrogen compound metabolic process;GO:0008150//biological_process;GO:1901360//organic cyclic compound metabolic process;GO:0009987//cellular process;GO:0034641//cellular nitrogen compound metabolic process;GO:0043170//macromolecule metabolic process;GO:0044238//primary metabolic process;GO:0071704//organic substance metabolic process;GO:0090304/…
Bra001884	101	47.3333	3.01333	1.43667	-1.06863	0.000636768	0.00930412	yes	-	-	-	-
Bra001900	106.667	17.3333	16.15	2.56667	-2.65357	6.61075e-16	8.81358e-14	yes	AT3G23050 (E=2e-110) IAA7, AXR2 | IAA7 (INDOLE-3-ACETIC ACID 7); transcription factor	GO:0043231//intracellular membrane-bounded organelle;GO:0005622//intracellular;GO:0044424//intracellular part;GO:0043229//intracellular organelle;GO:0043227//membrane-bounded organelle;GO:0043226//organelle;GO:0005623//cell;GO:0044464//cell part;GO:0005634//nucleus;GO:0005575//cellular_component	GO:0003674//molecular_function;GO:0005515//protein binding;GO:0005488//binding	GO:0050789//regulation of biological process;GO:0044237//cellular metabolic process;GO:1901360//organic cyclic compound metabolic process;GO:0006807//nitrogen compound metabolic process;GO:0050794//regulation of cellular process;GO:0051716//cellular response to stimulus;GO:0008150//biological_process;GO:0044700//single organism signaling;GO:0009719//response to endogenous stimulus;GO:0009058//bio…
Bra001903	6.33333	45.6667	0.316667	2.18667	2.7877	6.4571e-09	3.45874e-07	yes	AT3G16030 (E=1e-191) CES101 | CES101 (CALLUS EXPRESSION OF RBCS 101); ATP binding / carbohydrate binding / kinase/ protein kinase/ protein serine/threonine kinase/ protein tyrosine kinase/ sugar binding	-	GO:0003824//catalytic activity;GO:0097159//organic cyclic compound binding;GO:0005488//binding;GO:0016740//transferase activity;GO:0016772//transferase activity, transferring phosphorus-containing groups;GO:1901265//nucleoside phosphate binding;GO:0000166//nucleotide binding;GO:0036094//small molecule binding;GO:1901363//heterocyclic compound binding;GO:0003674//molecular_function;GO:0016301//kin…	GO:0019538//protein metabolic process;GO:0006464//cellular protein modification process;GO:0044260//cellular macromolecule metabolic process;GO:0036211//protein modification process;GO:0071704//organic substance metabolic process;GO:0009987//cellular process;GO:0008150//biological_process;GO:0043170//macromolecule metabolic process;GO:0008152//metabolic process;GO:0043412//macromolecule modificat…
Bra001917	0	4.33333	0.001	0.673333	9.39518	0.00245458	0.0279005	yes	AT1G66390 (E=5e-110) ATMYB90, PAP2, MYB90 | MYB90 (MYB DOMAIN PROTEIN 90); DNA binding / transcription factor	-	GO:0003682//chromatin binding;GO:0003676//nucleic acid binding;GO:0003674//molecular_function;GO:1901363//heterocyclic compound binding;GO:0005488//binding;GO:0097159//organic cyclic compound binding;GO:0003677//DNA binding;GO:0044877//macromolecular complex binding	GO:0008152//metabolic process;GO:0008150//biological_process;GO:0009058//biosynthetic process
Bra001919	66.3333	160	3.28	7.69333	1.22991	0.00173839	0.0209027	yes	AT3G23790 (E=0.0) | AMP-binding protein, putative	GO:0043231//intracellular membrane-bounded organelle;GO:0043229//intracellular organelle;GO:0043227//membrane-bounded organelle;GO:0005622//intracellular;GO:0005623//cell;GO:0043226//organelle;GO:0044444//cytoplasmic part;GO:0044464//cell part;GO:0044424//intracellular part;GO:0009536//plastid;GO:0005737//cytoplasm;GO:0005575//cellular_component	GO:0003824//catalytic activity;GO:0003674//molecular_function	GO:0008150//biological_process;GO:0008152//metabolic process
Bra001937	38.6667	294	2.45333	18.79	2.93715	4.08985e-29	1.58809e-26	yes	AT3G23920 (E=1e-263) BAM1, BMY7, TR-BAMY | BAM1 (BETA-AMYLASE 1); beta-amylase	-	GO:0003674//molecular_function;GO:0003824//catalytic activity;GO:0016787//hydrolase activity	GO:0008150//biological_process;GO:0009056//catabolic process;GO:0008152//metabolic process;GO:0044238//primary metabolic process;GO:0005975//carbohydrate metabolic process;GO:0071704//organic substance metabolic process
Bra001958	263.667	40.6667	60.1	9.40333	-2.67612	1.24521e-16	1.7424e-14	yes	AT2G16060 (E=2e-081) GLB1, AHB1, ARATH GLB1, NSHB1, ATGLB1 | AHB1 (ARABIDOPSIS HEMOGLOBIN 1); oxygen binding / oxygen transporter	GO:0005737//cytoplasm;GO:0030312//external encapsulating structure;GO:0044464//cell part;GO:0005575//cellular_component;GO:0044444//cytoplasmic part;GO:0005623//cell;GO:0016020//membrane;GO:0044424//intracellular part;GO:0005829//cytosol;GO:0005886//plasma membrane;GO:0005618//cell wall;GO:0071944//cell periphery;GO:0005622//intracellular	GO:0003674//molecular_function;GO:0005488//binding;GO:0019825//oxygen binding	GO:0006950//response to stress;GO:0050896//response to stimulus;GO:0009987//cellular process;GO:0007154//cell communication;GO:0044763//single-organism cellular process;GO:0008152//metabolic process;GO:0065007//biological regulation;GO:0044699//single-organism process;GO:0051179//localization;GO:0009605//response to external stimulus;GO:0007165//signal transduction;GO:0008150//biological_process;…
Bra001973	9	1	0.473333	0.0566667	-3.06228	0.00507579	0.0491351	yes	AT2G16270 (E=1e-101) | unknown protein	-	-	GO:0007049//cell cycle;GO:0071840//cellular component organization or biogenesis;GO:0009987//cellular process;GO:0016043//cellular component organization;GO:0008150//biological_process;GO:0044699//single-organism process;GO:0044763//single-organism cellular process
Bra002039	45.3333	245.667	3.17	17.4933	2.46425	1.17065e-18	1.94466e-16	yes	-	-	-	-
Bra002046	1.33333	9.33333	0.12	0.916667	2.93336	0.00246576	0.0279855	yes	AT3G11520 (E=5e-142) CYCB1;3, CYC2 | CYCB1;3 (CYCLIN B1;3); cyclin-dependent protein kinase regulator	GO:0043227//membrane-bounded organelle;GO:0005575//cellular_component;GO:0005623//cell;GO:0044464//cell part;GO:0005634//nucleus;GO:0044424//intracellular part;GO:0043226//organelle;GO:0005622//intracellular;GO:0043231//intracellular membrane-bounded organelle;GO:0043229//intracellular organelle	GO:0005488//binding;GO:0005515//protein binding;GO:0003674//molecular_function	GO:0048731//system development;GO:0044699//single-organism process;GO:0003006//developmental process involved in reproduction;GO:0044237//cellular metabolic process;GO:0071840//cellular component organization or biogenesis;GO:0043412//macromolecule modification;GO:0090304//nucleic acid metabolic process;GO:0006259//DNA metabolic process;GO:0043170//macromolecule metabolic process;GO:0032501//mult…
Bra002080	152.35	42.6667	35.5433	9.93667	-1.83875	1.11076e-10	7.75383e-09	yes	-	-	-	-
Bra002101	167.333	36.1333	19.0067	3.90667	-2.2825	5.42213e-13	5.19855e-11	yes	AT5G17710 (E=2e-105) EMB1241 | EMB1241 (embryo defective 1241); adenyl-nucleotide exchange factor/ chaperone binding / protein binding / protein homodimerization	GO:0005575//cellular_component;GO:0005623//cell;GO:0043226//organelle;GO:0044444//cytoplasmic part;GO:0005739//mitochondrion;GO:0043231//intracellular membrane-bounded organelle;GO:0005622//intracellular;GO:0044464//cell part;GO:0044424//intracellular part;GO:0043229//intracellular organelle;GO:0043227//membrane-bounded organelle;GO:0005737//cytoplasm	GO:0005515//protein binding;GO:0097159//organic cyclic compound binding;GO:0000166//nucleotide binding;GO:0030234//enzyme regulator activity;GO:0003674//molecular_function;GO:0036094//small molecule binding;GO:1901265//nucleoside phosphate binding;GO:1901363//heterocyclic compound binding;GO:0098772//molecular function regulator;GO:0005488//binding	GO:0009987//cellular process;GO:0008150//biological_process
Bra002112	42	11.3333	2.58333	0.713333	-1.85659	0.00164161	0.0200216	yes	AT5G17860 (E=2e-264) CAX7 | CAX7 (calcium exchanger 7); calcium:sodium antiporter/ cation:cation antiporter	GO:0016020//membrane;GO:0005575//cellular_component	-	GO:0051179//localization;GO:0006810//transport;GO:0009987//cellular process;GO:0008150//biological_process;GO:0051234//establishment of localization
Bra002113	5.33333	0	1.73	0.001	-10.7566	0.000531395	0.00804447	yes	AT5G17870 (E=5e-044) PSRP6 | PSRP6 (PLASTID-SPECIFIC 50S RIBOSOMAL PROTEIN 6)	GO:0043232//intracellular non-membrane-bounded organelle;GO:0043228//non-membrane-bounded organelle;GO:0043227//membrane-bounded organelle;GO:0043226//organelle;GO:0043231//intracellular membrane-bounded organelle;GO:0044444//cytoplasmic part;GO:0044424//intracellular part;GO:1990904//ribonucleoprotein complex;GO:0043229//intracellular organelle;GO:0005622//intracellular;GO:0005623//cell;GO:00055…	GO:0005198//structural molecule activity;GO:0005488//binding;GO:0003676//nucleic acid binding;GO:0003674//molecular_function;GO:1901363//heterocyclic compound binding;GO:0097159//organic cyclic compound binding;GO:0003723//RNA binding	GO:0010467//gene expression;GO:0008150//biological_process;GO:0008152//metabolic process;GO:1901576//organic substance biosynthetic process;GO:0034641//cellular nitrogen compound metabolic process;GO:0044271//cellular nitrogen compound biosynthetic process;GO:0044237//cellular metabolic process;GO:0009058//biosynthetic process;GO:0044267//cellular protein metabolic process;GO:0044260//cellular ma…
Bra002137	107.667	16	11.35	1.73	-2.71385	5.41234e-16	7.2783e-14	yes	AT5G18140 (E=5e-112) | DNAJ heat shock N-terminal domain-containing protein	GO:0044444//cytoplasmic part;GO:0044424//intracellular part;GO:0043229//intracellular organelle;GO:0005622//intracellular;GO:0009536//plastid;GO:0043227//membrane-bounded organelle;GO:0005575//cellular_component;GO:0043231//intracellular membrane-bounded organelle;GO:0005623//cell;GO:0043226//organelle;GO:0005737//cytoplasm;GO:0044464//cell part	-	-
Bra002159	80.6667	550.333	9.33333	64.0967	2.77979	7.98063e-17	1.1372e-14	yes	AT5G18450 (E=7e-123) | AP2 domain-containing transcription factor, putative	GO:0044464//cell part;GO:0043229//intracellular organelle;GO:0005623//cell;GO:0044424//intracellular part;GO:0043226//organelle;GO:0005622//intracellular;GO:0005634//nucleus;GO:0043227//membrane-bounded organelle;GO:0043231//intracellular membrane-bounded organelle;GO:0005575//cellular_component	GO:0005488//binding;GO:0003700//transcription factor activity, sequence-specific DNA binding;GO:0001071//nucleic acid binding transcription factor activity;GO:0003676//nucleic acid binding;GO:0003674//molecular_function;GO:0003677//DNA binding;GO:0097159//organic cyclic compound binding;GO:1901363//heterocyclic compound binding	GO:1901360//organic cyclic compound metabolic process;GO:0006807//nitrogen compound metabolic process;GO:0044238//primary metabolic process;GO:0046483//heterocycle metabolic process;GO:0034641//cellular nitrogen compound metabolic process;GO:0009987//cellular process;GO:0006139//nucleobase-containing compound metabolic process;GO:0009058//biosynthetic process;GO:0008152//metabolic process;GO:0044…
Bra002162	30.3333	97.3333	1.99333	6.46	1.69635	1.5141e-08	7.43032e-07	yes	AT5G18490 (E=7e-292) | unknown protein	-	-	GO:0051716//cellular response to stimulus;GO:0044763//single-organism cellular process;GO:0008150//biological_process;GO:0050896//response to stimulus;GO:0044699//single-organism process;GO:0007154//cell communication;GO:0007165//signal transduction;GO:0044700//single organism signaling;GO:0065007//biological regulation;GO:0009719//response to endogenous stimulus;GO:0050789//regulation of biologi…
Bra002174	55.3333	7.33333	5.7	0.756667	-2.91323	3.22631e-11	2.42083e-09	yes	AT5G18630 (E=2e-176) | lipase class 3 family protein	-	GO:0003824//catalytic activity;GO:0003674//molecular_function;GO:0016787//hydrolase activity	GO:0044238//primary metabolic process;GO:0008150//biological_process;GO:0008152//metabolic process;GO:0044699//single-organism process;GO:0071704//organic substance metabolic process;GO:0044710//single-organism metabolic process;GO:0006629//lipid metabolic process
Bra002177	63.3333	30	5.54	2.59	-1.09693	0.000923794	0.0126251	yes	AT5G18660 (E=1e-192) PCB2 | PCB2 (PALE-GREEN AND CHLOROPHYLL B REDUCED 2); 3,8-divinyl protochlorophyllide a 8-vinyl reductase	GO:0043227//membrane-bounded organelle;GO:0005622//intracellular;GO:0016020//membrane;GO:0005737//cytoplasm;GO:0005575//cellular_component;GO:0044464//cell part;GO:0005623//cell;GO:0009536//plastid;GO:0043231//intracellular membrane-bounded organelle;GO:0043226//organelle;GO:0044444//cytoplasmic part;GO:0009579//thylakoid;GO:0043229//intracellular organelle;GO:0044424//intracellular part	GO:0003824//catalytic activity;GO:0003674//molecular_function	GO:0008150//biological_process;GO:0044699//single-organism process;GO:0032501//multicellular organismal process;GO:0008152//metabolic process;GO:0071704//organic substance metabolic process;GO:0006807//nitrogen compound metabolic process;GO:0044237//cellular metabolic process;GO:0048856//anatomical structure development;GO:0009653//anatomical structure morphogenesis;GO:0044238//primary metabolic …
Bra002178	412.667	152.667	27.3933	10.1967	-1.42573	7.07226e-09	3.76186e-07	yes	AT5G18670 (E=3e-257) BMY3, BAM9 | BMY3; beta-amylase/ catalytic/ cation binding	-	GO:0003674//molecular_function;GO:0016787//hydrolase activity;GO:0003824//catalytic activity	GO:0071704//organic substance metabolic process;GO:0005975//carbohydrate metabolic process;GO:0009056//catabolic process;GO:0008152//metabolic process;GO:0008150//biological_process;GO:0044238//primary metabolic process
Bra002196	20	59	1.42	4.20667	1.56679	8.73219e-06	0.000235262	yes	AT5G18950 (E=2e-167) | pentatricopeptide (PPR) repeat-containing protein	-	-	GO:0044238//primary metabolic process;GO:1901360//organic cyclic compound metabolic process;GO:0009628//response to abiotic stimulus;GO:0090304//nucleic acid metabolic process;GO:0046483//heterocycle metabolic process;GO:0071704//organic substance metabolic process;GO:0016043//cellular component organization;GO:0009987//cellular process;GO:0044260//cellular macromolecule metabolic process;GO:0071…
Bra002198	7.33333	23.6667	1.54	4.91	1.67279	0.00455492	0.0451193	yes	-	-	-	-
Bra002214	351	98.3333	32.7133	9.29667	-1.81509	1.50187e-06	4.87503e-05	yes	AT5G19120 (E=2e-148) | aspartic-type endopeptidase	-	GO:0016787//hydrolase activity;GO:0003824//catalytic activity;GO:0003674//molecular_function	GO:0071704//organic substance metabolic process;GO:0008150//biological_process;GO:0008152//metabolic process;GO:0044238//primary metabolic process;GO:0043170//macromolecule metabolic process;GO:0019538//protein metabolic process
Bra002236	387.667	183	42.4767	20.2433	-1.06922	1.87587e-06	5.95827e-05	yes	AT5G19440 (E=7e-172) | cinnamyl-alcohol dehydrogenase, putative (CAD)	GO:0005886//plasma membrane;GO:0005737//cytoplasm;GO:0005623//cell;GO:0016020//membrane;GO:0043231//intracellular membrane-bounded organelle;GO:0043226//organelle;GO:0043227//membrane-bounded organelle;GO:0005575//cellular_component;GO:0044464//cell part;GO:0071944//cell periphery;GO:0044444//cytoplasmic part;GO:0012505//endomembrane system;GO:0005794//Golgi apparatus;GO:0044424//intracellular pa…	GO:0003674//molecular_function;GO:0003824//catalytic activity;GO:0005488//binding	GO:0008150//biological_process;GO:0008152//metabolic process;GO:0009987//cellular process
Bra002245	257.333	773.333	23.15	69.9867	1.59607	1.58913e-12	1.41446e-10	yes	AT5G19550 (E=7e-220) ASP2, AAT2 | ASP2 (ASPARTATE AMINOTRANSFERASE 2); L-aspartate:2-oxoglutarate aminotransferase	-	GO:0003674//molecular_function;GO:0003824//catalytic activity;GO:0005488//binding;GO:0016740//transferase activity	GO:0008150//biological_process;GO:0009987//cellular process;GO:0009058//biosynthetic process;GO:0008152//metabolic process
Bra002260	1.70667	289.753	0.143333	25.35	7.46647	6.01389e-68	1.3344e-64	yes	AT5G19770 (E=3e-139) TUA3 | TUA3; structural constituent of cytoskeleton	GO:0043228//non-membrane-bounded organelle;GO:0043226//organelle;GO:0005575//cellular_component;GO:0044424//intracellular part;GO:0044464//cell part;GO:0043232//intracellular non-membrane-bounded organelle;GO:0005856//cytoskeleton;GO:0005623//cell;GO:0005622//intracellular;GO:0043229//intracellular organelle	GO:0003674//molecular_function;GO:0036094//small molecule binding;GO:0000166//nucleotide binding;GO:0005198//structural molecule activity;GO:1901265//nucleoside phosphate binding;GO:0003824//catalytic activity;GO:0016787//hydrolase activity;GO:1901363//heterocyclic compound binding;GO:0005488//binding;GO:0097159//organic cyclic compound binding	GO:0009987//cellular process;GO:0008150//biological_process;GO:0016043//cellular component organization;GO:0071840//cellular component organization or biogenesis
Bra002261	1324.29	425.247	106.143	33.6567	-1.65705	1.03252e-16	1.45791e-14	yes	AT5G19770 (E=6e-236) TUA3 | TUA3; structural constituent of cytoskeleton	GO:0043229//intracellular organelle;GO:0043228//non-membrane-bounded organelle;GO:0043232//intracellular non-membrane-bounded organelle;GO:0005623//cell;GO:0043226//organelle;GO:0005622//intracellular;GO:0044424//intracellular part;GO:0005575//cellular_component;GO:0005856//cytoskeleton;GO:0044464//cell part	GO:0000166//nucleotide binding;GO:0005488//binding;GO:0005198//structural molecule activity;GO:0003824//catalytic activity;GO:0016787//hydrolase activity;GO:0003674//molecular_function;GO:1901363//heterocyclic compound binding;GO:0036094//small molecule binding;GO:1901265//nucleoside phosphate binding;GO:0097159//organic cyclic compound binding	GO:0016043//cellular component organization;GO:0009987//cellular process;GO:0008150//biological_process;GO:0071840//cellular component organization or biogenesis
Bra002267	28.62	0	2.26333	0.001	-11.1442	1.22392e-14	1.42396e-12	yes	AT3G26010 (E=3e-100) | F-box family protein	-	GO:0005488//binding;GO:0003674//molecular_function;GO:0005515//protein binding	-
Bra002281	223	662.667	11.0367	32.9033	1.57593	6.4197e-15	7.75959e-13	yes	-	-	-	-
Bra002283	32	4.66667	6.52333	0.93	-2.81031	3.4908e-07	1.30334e-05	yes	AT5G20230 (E=9e-053) ATBCB, BCB | ATBCB (ARABIDOPSIS BLUE-COPPER-BINDING PROTEIN); copper ion binding / electron carrier	-	GO:0005488//binding;GO:0003674//molecular_function	-
Bra002290	323	719.667	51.15	114.893	1.16749	1.61651e-08	7.84612e-07	yes	AT5G20290 (E=4e-087) | 40S ribosomal protein S8 (RPS8A)	GO:0005622//intracellular;GO:0043228//non-membrane-bounded organelle;GO:0044444//cytoplasmic part;GO:0044424//intracellular part;GO:0043226//organelle;GO:0005737//cytoplasm;GO:0043229//intracellular organelle;GO:1990904//ribonucleoprotein complex;GO:0043232//intracellular non-membrane-bounded organelle;GO:0005575//cellular_component;GO:0005840//ribosome;GO:0030529//intracellular ribonucleoprotein…	GO:0003674//molecular_function;GO:0005198//structural molecule activity	GO:0043603//cellular amide metabolic process;GO:0009058//biosynthetic process;GO:1901576//organic substance biosynthetic process;GO:0019538//protein metabolic process;GO:0009987//cellular process;GO:0043170//macromolecule metabolic process;GO:0043043//peptide biosynthetic process;GO:0008152//metabolic process;GO:0034641//cellular nitrogen compound metabolic process;GO:0044238//primary metabolic p…
Bra002320	34	98.6667	2.27667	6.56667	1.52824	2.03909e-07	8.04859e-06	yes	-	-	-	-
Bra002348	16	82.3333	2.23667	11.1133	2.31287	1.03881e-06	3.49615e-05	yes	-	-	-	-
Bra002357	231.333	104	14.7133	6.60667	-1.15513	4.25889e-05	0.000942966	yes	AT5G21105 (E=2e-296) | L-ascorbate oxidase/ copper ion binding / oxidoreductase	GO:0005575//cellular_component;GO:0005576//extracellular region	GO:0005488//binding;GO:0003674//molecular_function;GO:0003824//catalytic activity	GO:0008150//biological_process;GO:0008152//metabolic process
Bra002410	57	268	7.46333	31.6333	2.08355	3.66154e-05	0.000826614	yes	AT3G44540 (E=5e-107) FAR4 | FAR4 (FATTY ACID REDUCTASE 4); binding / catalytic/ oxidoreductase, acting on the CH-CH group of donors	-	GO:0003674//molecular_function;GO:0003824//catalytic activity	-
Bra002423	179.667	76.6667	15.0033	6.41333	-1.22614	9.53687e-07	3.24839e-05	yes	AT5G22630 (E=8e-221) ADT5 | ADT5 (arogenate dehydratase 5); arogenate dehydratase/ prephenate dehydratase	-	GO:0003674//molecular_function;GO:0003824//catalytic activity;GO:0005488//binding	GO:0009987//cellular process;GO:0009058//biosynthetic process;GO:0008152//metabolic process;GO:0008150//biological_process
Bra002440	20.6667	3.66667	3.80333	0.753333	-2.3359	0.00384319	0.039597	yes	-	-	-	-
Bra002478	35	12	11.7033	4.03667	-1.53568	0.00439704	0.0439478	yes	AT5G60460 (E=8e-026) | sec61beta family protein	GO:0005623//cell;GO:0005737//cytoplasm;GO:0016020//membrane;GO:0043229//intracellular organelle;GO:0012505//endomembrane system;GO:0043227//membrane-bounded organelle;GO:0005575//cellular_component;GO:0044444//cytoplasmic part;GO:0044464//cell part;GO:0043226//organelle;GO:0044424//intracellular part;GO:0005783//endoplasmic reticulum;GO:0043231//intracellular membrane-bounded organelle;GO:0005622…	-	GO:0006810//transport;GO:0051234//establishment of localization;GO:0008150//biological_process;GO:0051179//localization
Bra002512	30.6667	139	2.29333	9.89333	2.10901	6.57206e-06	0.00018131	yes	AT5G60100 (E=2e-101) APRR3, PRR3 | APRR3 (ARABIDOPSIS PSEUDO-RESPONSE REGULATOR 3); transcription regulator/ two-component response regulator	-	GO:0005515//protein binding;GO:0005488//binding;GO:0004871//signal transducer activity;GO:0003674//molecular_function	GO:0009058//biosynthetic process;GO:0007154//cell communication;GO:0006139//nucleobase-containing compound metabolic process;GO:0071704//organic substance metabolic process;GO:0034641//cellular nitrogen compound metabolic process;GO:0050896//response to stimulus;GO:0051716//cellular response to stimulus;GO:0023052//signaling;GO:1901360//organic cyclic compound metabolic process;GO:0046483//hetero…
Bra002518	81.6667	279	8.31333	26.3133	1.6623	0.000803021	0.0112976	yes	-	-	-	-
Bra002570	5.66667	24	0.393333	1.55333	1.98154	0.000197067	0.00350011	yes	AT5G59390 (E=1e-200) | XH/XS domain-containing protein	-	-	GO:0009987//cellular process;GO:0008152//metabolic process;GO:0008150//biological_process
Bra002609	31	3.33333	1.96	0.206667	-3.24548	5.81308e-09	3.12959e-07	yes	AT5G58910 (E=7e-280) LAC16 | LAC16 (laccase 16); laccase	GO:0005576//extracellular region;GO:0005575//cellular_component	GO:0003824//catalytic activity;GO:0003674//molecular_function;GO:0005488//binding	GO:0009987//cellular process;GO:0019748//secondary metabolic process;GO:0008150//biological_process;GO:0044710//single-organism metabolic process;GO:0009056//catabolic process;GO:0008152//metabolic process;GO:0044699//single-organism process
Bra002622	75	180	7.97667	18.43	1.2082	0.00093328	0.0127267	yes	AT5G58730 (E=1e-155) | pfkB-type carbohydrate kinase family protein	-	GO:1901363//heterocyclic compound binding;GO:0016740//transferase activity;GO:0003674//molecular_function;GO:0036094//small molecule binding;GO:1901265//nucleoside phosphate binding;GO:0016301//kinase activity;GO:0016772//transferase activity, transferring phosphorus-containing groups;GO:0097159//organic cyclic compound binding;GO:0000166//nucleotide binding;GO:0003824//catalytic activity;GO:0005…	GO:0009987//cellular process;GO:0009058//biosynthetic process;GO:0008150//biological_process;GO:0008152//metabolic process
Bra002639	39.3333	107	3.07333	7.92	1.3657	0.000523126	0.00793864	yes	AT5G58540 (E=7e-174) | protein kinase family protein	-	GO:0016772//transferase activity, transferring phosphorus-containing groups;GO:1901363//heterocyclic compound binding;GO:1901265//nucleoside phosphate binding;GO:0097159//organic cyclic compound binding;GO:0000166//nucleotide binding;GO:0036094//small molecule binding;GO:0003674//molecular_function;GO:0003824//catalytic activity;GO:0016740//transferase activity;GO:0005488//binding;GO:0016301//kin…	GO:0006464//cellular protein modification process;GO:0044260//cellular macromolecule metabolic process;GO:0008152//metabolic process;GO:0008150//biological_process;GO:0009058//biosynthetic process;GO:0044238//primary metabolic process;GO:0071704//organic substance metabolic process;GO:0005975//carbohydrate metabolic process;GO:0043170//macromolecule metabolic process;GO:0043412//macromolecule mod…
Bra002648	0.666667	8.66667	0.0333333	0.393333	3.56071	0.00109623	0.0145093	yes	AT5G37060 (E=6e-269) ATCHX24, CHX24 | ATCHX24; monovalent cation:proton antiporter/ sodium:hydrogen antiporter	GO:0016020//membrane;GO:0005575//cellular_component	GO:0003674//molecular_function;GO:0005215//transporter activity	GO:0008150//biological_process;GO:0006810//transport;GO:0009987//cellular process;GO:0051179//localization;GO:0051234//establishment of localization
Bra002658	87.66	37.3333	5.64667	2.41333	-1.22637	3.79611e-05	0.00085389	yes	AT5G58350 (E=2e-243) WNK4, ZIK2 | WNK4 (WITH NO K (=LYSINE) 4); kinase/ protein kinase	-	GO:0036094//small molecule binding;GO:0003674//molecular_function;GO:0005488//binding;GO:1901265//nucleoside phosphate binding;GO:0016301//kinase activity;GO:0003824//catalytic activity;GO:0097159//organic cyclic compound binding;GO:0016772//transferase activity, transferring phosphorus-containing groups;GO:0016740//transferase activity;GO:1901363//heterocyclic compound binding;GO:0000166//nucleo…	GO:0044237//cellular metabolic process;GO:0043170//macromolecule metabolic process;GO:0036211//protein modification process;GO:0019538//protein metabolic process;GO:0043412//macromolecule modification;GO:0008152//metabolic process;GO:0008150//biological_process;GO:0044267//cellular protein metabolic process;GO:0006464//cellular protein modification process;GO:0009987//cellular process;GO:0044238/…
Bra002705	12.6667	3.16667	3.14	0.733333	-2.09822	0.00353268	0.0371997	yes	-	-	-	-
Bra002707	12.6667	3.16667	3.14	0.733333	-2.09822	0.00353408	0.0372019	yes	-	-	-	-
Bra002722	698	1647	86.74	199.377	1.20073	0.00183842	0.0218807	yes	AT5G57550 (E=2e-146) XTR3 | XTR3 (XYLOGLUCAN ENDOTRANSGLYCOSYLASE 3); hydrolase, acting on glycosyl bonds / xyloglucan:xyloglucosyl transferase	GO:0005618//cell wall;GO:0030312//external encapsulating structure;GO:0071944//cell periphery;GO:0005575//cellular_component;GO:0044464//cell part;GO:0005623//cell;GO:0005576//extracellular region	GO:0003824//catalytic activity;GO:0016740//transferase activity;GO:0003674//molecular_function;GO:0016787//hydrolase activity	GO:0008150//biological_process;GO:0009987//cellular process;GO:0016043//cellular component organization;GO:0044238//primary metabolic process;GO:0071704//organic substance metabolic process;GO:0005975//carbohydrate metabolic process;GO:0008152//metabolic process;GO:0071840//cellular component organization or biogenesis
Bra002732	32	82.6667	5.75667	14.9633	1.37813	0.00125341	0.0161026	yes	-	-	-	-
Bra002758	77.6667	20.6667	3.70333	0.976667	-1.92289	6.27556e-07	2.24849e-05	yes	-	-	-	-
Bra002788	23.6667	7	2.19333	0.626667	-1.80735	0.000639316	0.00933257	yes	AT5G56860 (E=3e-134) GNC | GNC (GATA, nitrate-inducible, carbon metabolism-involved); transcription factor	-	GO:0097159//organic cyclic compound binding;GO:0003700//transcription factor activity, sequence-specific DNA binding;GO:0005488//binding;GO:0003674//molecular_function;GO:0003677//DNA binding;GO:0003676//nucleic acid binding;GO:0001071//nucleic acid binding transcription factor activity;GO:1901363//heterocyclic compound binding	GO:0009058//biosynthetic process;GO:1901360//organic cyclic compound metabolic process;GO:0009987//cellular process;GO:0006725//cellular aromatic compound metabolic process;GO:0034641//cellular nitrogen compound metabolic process;GO:0071704//organic substance metabolic process;GO:0006807//nitrogen compound metabolic process;GO:0046483//heterocycle metabolic process;GO:0008150//biological_process;…
Bra002812	58	23.3333	4.53333	1.85667	-1.28786	0.00136676	0.0172941	yes	AT5G56510 (E=1e-186) APUM12 | APUM12 (ARABIDOPSIS PUMILIO 12); RNA binding / binding	-	GO:0003676//nucleic acid binding;GO:0003723//RNA binding;GO:1901363//heterocyclic compound binding;GO:0003674//molecular_function;GO:0097159//organic cyclic compound binding;GO:0005488//binding	-
Bra002828	101	48	5.49333	2.58667	-1.08659	0.000577123	0.00859431	yes	AT5G56270 (E=7e-260) WRKY2, ATWRKY2 | WRKY2; transcription factor	-	GO:0003676//nucleic acid binding;GO:0097159//organic cyclic compound binding;GO:0003677//DNA binding;GO:1901363//heterocyclic compound binding;GO:0001071//nucleic acid binding transcription factor activity;GO:0003674//molecular_function;GO:0003700//transcription factor activity, sequence-specific DNA binding;GO:0005488//binding	GO:0044238//primary metabolic process;GO:0008152//metabolic process;GO:0006139//nucleobase-containing compound metabolic process;GO:0009987//cellular process;GO:0034641//cellular nitrogen compound metabolic process;GO:0008150//biological_process;GO:0006725//cellular aromatic compound metabolic process;GO:0006807//nitrogen compound metabolic process;GO:0044237//cellular metabolic process;GO:004648…
Bra002860	17	4.66667	2.23	0.606667	-1.87807	0.00113564	0.0148913	yes	-	-	-	-
Bra002914	16	2.33333	5.80667	0.846667	-2.77784	0.000157016	0.00288954	yes	-	-	-	-
Bra002944	98.6667	34.6667	15.0967	5.39	-1.48587	0.00255893	0.0288009	yes	AT5G54940 (E=9e-055) | eukaryotic translation initiation factor SUI1, putative	-	GO:0005488//binding;GO:0097159//organic cyclic compound binding;GO:1901363//heterocyclic compound binding;GO:0003676//nucleic acid binding;GO:0003723//RNA binding;GO:0003674//molecular_function;GO:0008135//translation factor activity, RNA binding	GO:0006412//translation;GO:0044238//primary metabolic process;GO:0009987//cellular process;GO:0044271//cellular nitrogen compound biosynthetic process;GO:0034641//cellular nitrogen compound metabolic process;GO:0010467//gene expression;GO:0009059//macromolecule biosynthetic process;GO:0044260//cellular macromolecule metabolic process;GO:0044249//cellular biosynthetic process;GO:0043604//amide bio…
Bra002948	96	19	6.56667	1.29667	-2.34035	1.08451e-08	5.50479e-07	yes	-	-	-	-
Bra002978	149.333	55	10.3933	3.7	-1.49006	6.18442e-08	2.66824e-06	yes	AT5G54570 (E=1e-263) BGLU41 | BGLU41 (BETA GLUCOSIDASE 41); catalytic/ cation binding / hydrolase, hydrolyzing O-glycosyl compounds	GO:0071944//cell periphery;GO:0044464//cell part;GO:0005575//cellular_component;GO:0030312//external encapsulating structure;GO:0005623//cell;GO:0005618//cell wall	GO:0016787//hydrolase activity;GO:0003674//molecular_function;GO:0003824//catalytic activity	GO:0008150//biological_process;GO:0044238//primary metabolic process;GO:0071704//organic substance metabolic process;GO:0005975//carbohydrate metabolic process;GO:0008152//metabolic process
Bra002987	4.66667	0	0.46	0.001	-8.84549	0.00319523	0.0344641	yes	-	-	-	-
Bra003009	25.6667	63.6667	2.66667	6.55	1.29646	6.31282e-05	0.00133131	yes	AT5G54160 (E=1e-170) ATOMT1, OMT1 | ATOMT1 (O-METHYLTRANSFERASE 1); caffeate O-methyltransferase/ myricetin 3'-O-methyltransferase/ quercetin 3-O-methyltransferase	-	GO:0005515//protein binding;GO:0005488//binding;GO:0016740//transferase activity;GO:0003824//catalytic activity;GO:0003674//molecular_function	GO:0008150//biological_process;GO:0008152//metabolic process
Bra003077	5.33333	0.333333	1.06333	0.0566667	-4.22995	0.00195067	0.0230402	yes	-	-	-	-
Bra003126	214	61.6667	11.0433	3.20333	-1.78553	7.05146e-12	5.79488e-10	yes	AT3G53260 (E=0.0) PAL2, ATPAL2 | PAL2; phenylalanine ammonia-lyase	GO:0005623//cell;GO:0005622//intracellular;GO:0005575//cellular_component;GO:0044464//cell part;GO:0044424//intracellular part;GO:0005737//cytoplasm	GO:0003824//catalytic activity;GO:0003674//molecular_function	GO:0019748//secondary metabolic process;GO:0009056//catabolic process;GO:0009987//cellular process;GO:0008150//biological_process;GO:0044710//single-organism metabolic process;GO:0008152//metabolic process;GO:0009058//biosynthetic process;GO:0044699//single-organism process
Bra003129	56.6667	21.6667	4.07	1.53	-1.4115	5.75452e-05	0.00122982	yes	AT3G53280 (E=1e-226) CYP71B5 | CYP71B5 (CYTOCHROME P450 71B5); electron carrier/ heme binding / iron ion binding / monooxygenase/ oxygen binding	-	GO:0003674//molecular_function;GO:0005488//binding;GO:0003824//catalytic activity	GO:0008150//biological_process;GO:0008152//metabolic process
Bra003177	211	23.6667	32.0567	3.50333	-3.19382	1.40484e-24	3.76208e-22	yes	AT3G54300 (E=2e-125) ATVAMP727, VAMP727 | ATVAMP727 (VESICLE-ASSOCIATED MEMBRANE PROTEIN 727)	GO:0016020//membrane;GO:0005575//cellular_component	-	GO:0006810//transport;GO:0051179//localization;GO:0051234//establishment of localization;GO:0008150//biological_process
Bra003186	552	192.667	42.51	14.8833	-1.5141	2.29727e-13	2.31905e-11	yes	AT3G54470 (E=9e-235) | uridine 5'-monophosphate synthase / UMP synthase (PYRE-F) (UMPS)	-	GO:0003824//catalytic activity;GO:0016740//transferase activity;GO:0003674//molecular_function	GO:0044238//primary metabolic process;GO:0006139//nucleobase-containing compound metabolic process;GO:0006725//cellular aromatic compound metabolic process;GO:0006807//nitrogen compound metabolic process;GO:0009987//cellular process;GO:0044237//cellular metabolic process;GO:0046483//heterocycle metabolic process;GO:0008152//metabolic process;GO:0008150//biological_process;GO:0009058//biosynthetic…
Bra003196	74	226.333	9.45333	28.5433	1.59426	1.08552e-09	6.58604e-08	yes	AT3G54820 (E=7e-157) PIP2D, PIP2;5 | PIP2;5 (PLASMA MEMBRANE INTRINSIC PROTEIN 2;5); water channel	GO:0005575//cellular_component;GO:0016020//membrane	GO:0005215//transporter activity;GO:0003674//molecular_function	GO:0051234//establishment of localization;GO:0051179//localization;GO:0008150//biological_process;GO:0006810//transport
Bra003217	45.3333	15.6667	5.42333	1.91	-1.50561	0.000106495	0.0020793	yes	-	-	-	-
Bra003219	8.33333	57	1.05333	6.94333	2.72067	6.47502e-11	4.68858e-09	yes	-	-	-	-
Bra003221	16.3333	4	1.92333	0.473333	-2.02268	0.00508794	0.049222	yes	AT3G55800 (E=3e-144) SBPASE | SBPASE (sedoheptulose-bisphosphatase); phosphoric ester hydrolase/ sedoheptulose-bisphosphatase	-	GO:0003674//molecular_function;GO:0003824//catalytic activity;GO:0016787//hydrolase activity	GO:0071704//organic substance metabolic process;GO:0044238//primary metabolic process;GO:0008150//biological_process;GO:0008152//metabolic process;GO:0005975//carbohydrate metabolic process
Bra003255	17	2.33333	1.15333	0.143333	-3.00836	9.97326e-05	0.00196954	yes	AT3G56700 (E=2e-127) FAR6 | FAR6 (FATTY ACID REDUCTASE 6); fatty acyl-CoA reductase (alcohol-forming)/ oxidoreductase, acting on the CH-CH group of donors, NAD or NADP as acceptor	-	GO:0003824//catalytic activity;GO:0003674//molecular_function	-
Bra003273	93.3333	35	9.96333	3.88667	-1.3581	0.00141765	0.017827	yes	AT3G57240 (E=1e-138) BG3 | BG3 (BETA-1,3-GLUCANASE 3); cellulase/ hydrolase, hydrolyzing O-glycosyl compounds	GO:0005618//cell wall;GO:0005623//cell;GO:0005575//cellular_component;GO:0071944//cell periphery;GO:0005576//extracellular region;GO:0044464//cell part;GO:0030312//external encapsulating structure	GO:0003674//molecular_function;GO:0003824//catalytic activity;GO:0016787//hydrolase activity	GO:0016265//death;GO:0051179//localization;GO:0009607//response to biotic stimulus;GO:0044700//single organism signaling;GO:0008219//cell death;GO:0044267//cellular protein metabolic process;GO:0008150//biological_process;GO:0050794//regulation of cellular process;GO:0009058//biosynthetic process;GO:0019538//protein metabolic process;GO:0071840//cellular component organization or biogenesis;GO:00…
Bra003276	13	40	0.466667	1.43333	1.61891	0.000766586	0.0108885	yes	AT3G57330 (E=0.0) ACA11 | ACA11 (autoinhibited Ca2+-ATPase 11); calcium-transporting ATPase/ calmodulin binding	GO:0005575//cellular_component;GO:0016020//membrane	GO:0005515//protein binding;GO:0016787//hydrolase activity;GO:1901363//heterocyclic compound binding;GO:1901265//nucleoside phosphate binding;GO:0005488//binding;GO:0005215//transporter activity;GO:0000166//nucleotide binding;GO:0003824//catalytic activity;GO:0036094//small molecule binding;GO:0097159//organic cyclic compound binding;GO:0003674//molecular_function	GO:0008150//biological_process;GO:0051234//establishment of localization;GO:0006810//transport;GO:0051179//localization;GO:0009987//cellular process
Bra003280	19.3333	49.3333	1.28667	3.31	1.36319	0.00255826	0.0288009	yes	-	-	-	-
Bra003289	17	85	1.14	5.57667	2.29037	1.70032e-09	1.00416e-07	yes	AT3G57610 (E=5e-231) ADSS | ADSS (ADENYLOSUCCINATE SYNTHASE); adenylosuccinate synthase	GO:0043229//intracellular organelle;GO:0043226//organelle;GO:0043227//membrane-bounded organelle;GO:0005737//cytoplasm;GO:0043231//intracellular membrane-bounded organelle;GO:0005623//cell;GO:0009536//plastid;GO:0044464//cell part;GO:0044424//intracellular part;GO:0044444//cytoplasmic part;GO:0005622//intracellular;GO:0005575//cellular_component	GO:0003824//catalytic activity;GO:0000166//nucleotide binding;GO:0003674//molecular_function;GO:1901363//heterocyclic compound binding;GO:0036094//small molecule binding;GO:0097159//organic cyclic compound binding;GO:1901265//nucleoside phosphate binding;GO:0005488//binding	GO:0009987//cellular process;GO:0044237//cellular metabolic process;GO:0006139//nucleobase-containing compound metabolic process;GO:0008150//biological_process;GO:0006807//nitrogen compound metabolic process;GO:0034641//cellular nitrogen compound metabolic process;GO:0044238//primary metabolic process;GO:0006725//cellular aromatic compound metabolic process;GO:0009058//biosynthetic process;GO:000…
Bra003340	90	351.667	10.6167	41.02	1.95	2.22635e-13	2.26011e-11	yes	AT3G58500 (E=3e-186) PP2A-3, EP7 | PP2A-3 (PROTEIN PHOSPHATASE 2A-3); protein serine/threonine phosphatase	-	GO:0016787//hydrolase activity;GO:0003674//molecular_function;GO:0003824//catalytic activity	GO:0036211//protein modification process;GO:0043412//macromolecule modification;GO:0044238//primary metabolic process;GO:0009987//cellular process;GO:0071704//organic substance metabolic process;GO:0008150//biological_process;GO:0019538//protein metabolic process;GO:0008152//metabolic process;GO:0043170//macromolecule metabolic process;GO:0044267//cellular protein metabolic process;GO:0006464//ce…
Bra003350	21.6667	51.6667	2.35	5.59333	1.25105	0.000477984	0.00735055	yes	AT3G58690 (E=7e-095) | protein kinase family protein	-	GO:0005488//binding;GO:0003674//molecular_function;GO:0016772//transferase activity, transferring phosphorus-containing groups;GO:1901363//heterocyclic compound binding;GO:0097159//organic cyclic compound binding;GO:0016740//transferase activity;GO:0036094//small molecule binding;GO:1901265//nucleoside phosphate binding;GO:0000166//nucleotide binding;GO:0003824//catalytic activity;GO:0016301//kin…	GO:0043170//macromolecule metabolic process;GO:0036211//protein modification process;GO:0044237//cellular metabolic process;GO:0008152//metabolic process;GO:0044238//primary metabolic process;GO:0019538//protein metabolic process;GO:0044260//cellular macromolecule metabolic process;GO:0043412//macromolecule modification;GO:0071704//organic substance metabolic process;GO:0044267//cellular protein …
Bra003358	38.3333	78	4.08667	8.42333	1.04347	0.000553484	0.00829398	yes	-	-	-	-
Bra003375	63	12.3333	8.95	1.72	-2.37948	2.21596e-07	8.66557e-06	yes	-	-	-	-
Bra003385	45	11.3333	3.40333	0.87	-1.96786	1.13452e-06	3.77387e-05	yes	-	-	-	-
Bra003387	33	71	3.58	7.56667	1.0797	0.000590168	0.00875501	yes	AT2G43770 (E=7e-183) | transducin family protein / WD-40 repeat family protein	-	GO:0005488//binding;GO:0003674//molecular_function;GO:0005515//protein binding	-
Bra003401	240.333	1.66667	16.95	0.11	-7.26764	1.51816e-63	2.48211e-60	yes	AT3G60130 (E=2e-263) BGLU16 | BGLU16 (BETA GLUCOSIDASE 16); catalytic/ cation binding / hydrolase, hydrolyzing O-glycosyl compounds	-	GO:0003674//molecular_function;GO:0003824//catalytic activity;GO:0016787//hydrolase activity	GO:0008152//metabolic process;GO:0071704//organic substance metabolic process;GO:0005975//carbohydrate metabolic process;GO:0008150//biological_process;GO:0044238//primary metabolic process
Bra003404	36	6	3.91333	0.663333	-2.56059	2.58961e-06	7.92549e-05	yes	AT3G60220 (E=6e-096) ATL4 | ATL4; protein binding / zinc ion binding	-	GO:0005515//protein binding;GO:0005488//binding;GO:0003674//molecular_function	-
Bra003428	208	45.6667	33.6867	7.42333	-2.18204	2.50417e-15	3.12408e-13	yes	AT3G60820 (E=5e-121) PBF1 | PBF1; peptidase/ threonine-type endopeptidase	GO:0043226//organelle;GO:0005623//cell;GO:0044464//cell part;GO:0005575//cellular_component;GO:0043229//intracellular organelle;GO:0005622//intracellular;GO:0005634//nucleus;GO:0044424//intracellular part;GO:0005737//cytoplasm;GO:0043227//membrane-bounded organelle;GO:0043231//intracellular membrane-bounded organelle	GO:0016787//hydrolase activity;GO:0003674//molecular_function;GO:0003824//catalytic activity	GO:0009987//cellular process;GO:0008150//biological_process;GO:0071704//organic substance metabolic process;GO:0044238//primary metabolic process;GO:0043170//macromolecule metabolic process;GO:0008152//metabolic process;GO:0009056//catabolic process;GO:0019538//protein metabolic process
Bra003430	14.6667	2	0.853333	0.113333	-2.91254	0.000115312	0.00222626	yes	-	-	-	-
Bra003444	3	18	0.22	1.29333	2.55552	0.00141059	0.0177475	yes	-	-	-	-
Bra003463	23.6667	5	4.52333	0.983333	-2.20163	0.00312035	0.0337738	yes	-	-	-	-
Bra003468	10.3333	2.66667	0.97	0.25	-1.95606	0.00365618	0.038228	yes	AT3G61750 (E=6e-186) | auxin-responsive protein -related	GO:0016020//membrane;GO:0005575//cellular_component	-	GO:0008150//biological_process;GO:0008152//metabolic process
Bra003480	2.66667	52	0.22	4.16333	4.24216	1.33724e-17	2.02634e-15	yes	-	-	-	-
Bra003490	31.3333	6	0.903333	0.173333	-2.38171	3.49499e-05	0.00079247	yes	AT3G62150 (E=0.0) PGP21 | PGP21 (P-GLYCOPROTEIN 21); ATPase, coupled to transmembrane movement of substances	GO:0005575//cellular_component;GO:0016020//membrane	GO:1901363//heterocyclic compound binding;GO:0016787//hydrolase activity;GO:0005488//binding;GO:0003824//catalytic activity;GO:0000166//nucleotide binding;GO:0003674//molecular_function;GO:0005215//transporter activity;GO:0097159//organic cyclic compound binding;GO:1901265//nucleoside phosphate binding;GO:0036094//small molecule binding	GO:0006810//transport;GO:0008150//biological_process;GO:0009987//cellular process;GO:0051234//establishment of localization;GO:0051179//localization
Bra003528	6.33333	0.666667	0.733333	0.0733333	-3.32193	0.001591	0.0195425	yes	-	-	-	-
Bra003535	128.667	12.3333	6.28667	0.626667	-3.32653	2.14699e-15	2.71114e-13	yes	AT1G79840 (E=0.0) GL2 | GL2 (GLABRA 2); DNA binding / transcription factor	GO:0044424//intracellular part;GO:0005622//intracellular;GO:0044464//cell part;GO:0043229//intracellular organelle;GO:0005623//cell;GO:0005634//nucleus;GO:0043226//organelle;GO:0043227//membrane-bounded organelle;GO:0005575//cellular_component;GO:0043231//intracellular membrane-bounded organelle	GO:0097159//organic cyclic compound binding;GO:0008289//lipid binding;GO:0001071//nucleic acid binding transcription factor activity;GO:0005488//binding;GO:0003700//transcription factor activity, sequence-specific DNA binding;GO:0003677//DNA binding;GO:1901363//heterocyclic compound binding;GO:0003674//molecular_function;GO:0003676//nucleic acid binding	GO:0006807//nitrogen compound metabolic process;GO:0044237//cellular metabolic process;GO:0071704//organic substance metabolic process;GO:0006139//nucleobase-containing compound metabolic process;GO:0006725//cellular aromatic compound metabolic process;GO:0009058//biosynthetic process;GO:0009987//cellular process;GO:0008152//metabolic process;GO:0008150//biological_process;GO:0044238//primary met…
Bra003546	246.333	113.333	36.18	16.7667	-1.1096	2.89599e-06	8.75107e-05	yes	AT1G80040 (E=8e-075) | unknown protein	-	GO:0005488//binding;GO:0003674//molecular_function;GO:0005515//protein binding	-
Bra003568	11	1.66667	0.71	0.103333	-2.78051	0.0041504	0.0419414	yes	AT5G51280 (E=7e-280) | DEAD-box protein abstrakt, putative	-	GO:0016787//hydrolase activity;GO:0036094//small molecule binding;GO:0003676//nucleic acid binding;GO:0097159//organic cyclic compound binding;GO:1901363//heterocyclic compound binding;GO:0000166//nucleotide binding;GO:0005488//binding;GO:1901265//nucleoside phosphate binding;GO:0003674//molecular_function;GO:0003824//catalytic activity	-
Bra003572	308	125	20.0767	8.19333	-1.293	1.53535e-08	7.52273e-07	yes	-	-	-	-
Bra003575	10	1	0.653333	0.0666667	-3.29278	0.000102273	0.00200695	yes	-	-	-	-
Bra003592	808.667	323.667	179.643	71.2767	-1.33363	1.50236e-07	6.10056e-06	yes	-	-	-	-
Bra003596	45.6667	99.6667	3.48333	7.32333	1.07203	0.00390417	0.0400261	yes	AT1G79720 (E=1e-225) | aspartyl protease family protein	-	GO:0016787//hydrolase activity;GO:0003824//catalytic activity;GO:0003674//molecular_function	GO:0043170//macromolecule metabolic process;GO:0008152//metabolic process;GO:0019538//protein metabolic process;GO:0008150//biological_process;GO:0071704//organic substance metabolic process;GO:0044238//primary metabolic process
Bra003607	18.3333	3.33333	2.42333	0.46	-2.39729	2.57675e-05	0.000614778	yes	-	-	-	-
Bra003609	230.333	112.333	10.0733	4.84333	-1.05647	4.49188e-06	0.000128596	yes	AT1G79490 (E=0.0) EMB2217 | EMB2217 (embryo defective 2217)	GO:0005575//cellular_component;GO:0043229//intracellular organelle;GO:0043227//membrane-bounded organelle;GO:0005622//intracellular;GO:0005623//cell;GO:0044424//intracellular part;GO:0043231//intracellular membrane-bounded organelle;GO:0044444//cytoplasmic part;GO:0005737//cytoplasm;GO:0005739//mitochondrion;GO:0043226//organelle;GO:0044464//cell part	GO:0005488//binding;GO:0005515//protein binding;GO:0003674//molecular_function	GO:0007275//multicellular organism development;GO:0008150//biological_process;GO:0032501//multicellular organismal process;GO:0032502//developmental process;GO:0044767//single-organism developmental process;GO:0009987//cellular process;GO:0044707//single-multicellular organism process;GO:0044699//single-organism process;GO:0000003//reproduction;GO:0030154//cell differentiation;GO:0044763//single-…
Bra003610	1.66667	8	0.173333	0.846667	2.28824	0.00454513	0.0450798	yes	AT1G79450 (E=1e-175) ALIS5 | ALIS5 (ALA-Interacting Subunit 5)	GO:0071944//cell periphery;GO:0016020//membrane;GO:0005575//cellular_component;GO:0005623//cell;GO:0005886//plasma membrane;GO:0044464//cell part	-	GO:0006810//transport;GO:0051234//establishment of localization;GO:0051179//localization;GO:0008150//biological_process
Bra003635	1219.67	1	101.11	0.09	-10.1337	3.72056e-108	5.77878e-104	yes	-	-	-	-
Bra003644	1924	827.667	313.457	136.35	-1.20095	8.57546e-09	4.46211e-07	yes	AT1G78380 (E=8e-103) ATGSTU19, GST8 | ATGSTU19 (GLUTATHIONE S-TRANSFERASE TAU 19); glutathione binding / glutathione transferase	-	GO:0005488//binding;GO:0003674//molecular_function;GO:0005515//protein binding	-
Bra003655	7.33333	0.666667	1.21667	0.1	-3.60486	0.0016737	0.0203411	yes	-	-	-	-
Bra003656	25.3333	0	4.74333	0.001	-12.2117	3.71974e-10	2.41232e-08	yes	-	-	-	-
Bra003661	0	13.3333	0.001	3.24	11.6618	4.89888e-08	2.14638e-06	yes	-	-	-	-
Bra003686	9.33333	0	2.47667	0.001	-11.2742	3.76718e-05	0.000849229	yes	-	-	-	-
Bra003705	1	7.66667	0.35	2.95333	3.07692	0.00169067	0.0205062	yes	-	-	-	-
Bra003712	17.3333	3.66667	3.54	0.683333	-2.37309	0.00299	0.0326242	yes	AT1G76650 (E=8e-078) CML38 | calcium-binding EF hand family protein	-	GO:0003674//molecular_function;GO:0005488//binding	-
Bra003724	49.3333	0.333333	3.94	0.0233333	-7.39966	5.24247e-20	9.86982e-18	yes	AT1G76360 (E=1e-189) | protein kinase, putative	-	GO:1901363//heterocyclic compound binding;GO:0016772//transferase activity, transferring phosphorus-containing groups;GO:0016740//transferase activity;GO:0003824//catalytic activity;GO:0000166//nucleotide binding;GO:0003674//molecular_function;GO:0036094//small molecule binding;GO:0005488//binding;GO:0016301//kinase activity;GO:0097159//organic cyclic compound binding;GO:1901265//nucleoside phosp…	GO:0019538//protein metabolic process;GO:0008150//biological_process;GO:0006464//cellular protein modification process;GO:0044267//cellular protein metabolic process;GO:0009987//cellular process;GO:0044260//cellular macromolecule metabolic process;GO:0043412//macromolecule modification;GO:0071704//organic substance metabolic process;GO:0043170//macromolecule metabolic process;GO:0036211//protein …
Bra003733	51	578.333	4.25333	47.2267	3.47294	1.50044e-43	1.45655e-40	yes	AT1G76010 (E=5e-085) | nucleic acid binding	-	GO:0003676//nucleic acid binding;GO:0003674//molecular_function;GO:0005488//binding;GO:0097159//organic cyclic compound binding;GO:1901363//heterocyclic compound binding	-
Bra003739	47	9.66667	8.61667	1.72333	-2.32193	5.37429e-08	2.34476e-06	yes	AT1G75840 (E=2e-099) ARAC5, ATGP3, ROP4, ATROP4 | ARAC5 (RAC-LIKE GTP BINDING PROTEIN 5); GTP binding / GTPase	GO:0005622//intracellular;GO:0005623//cell;GO:0005575//cellular_component;GO:0044464//cell part;GO:0016020//membrane	GO:0005488//binding;GO:0036094//small molecule binding;GO:0097159//organic cyclic compound binding;GO:0003674//molecular_function;GO:0000166//nucleotide binding;GO:1901265//nucleoside phosphate binding;GO:1901363//heterocyclic compound binding	GO:0050896//response to stimulus;GO:0050789//regulation of biological process;GO:0007154//cell communication;GO:0044763//single-organism cellular process;GO:0044700//single organism signaling;GO:0051716//cellular response to stimulus;GO:0009987//cellular process;GO:0008150//biological_process;GO:0065007//biological regulation;GO:0044699//single-organism process;GO:0050794//regulation of cellular …
Bra003759	10	2.66667	1.23	0.336667	-1.86927	0.00512423	0.0494806	yes	AT1G75240 (E=2e-094) AtHB33 | AtHB33 (ARABIDOPSIS THALIANA HOMEOBOX PROTEIN 33); DNA binding / transcription factor	-	GO:0003676//nucleic acid binding;GO:0097159//organic cyclic compound binding;GO:0003674//molecular_function;GO:0005488//binding;GO:0003677//DNA binding;GO:1901363//heterocyclic compound binding	-
Bra003787	48.3333	16	3.49667	1.17	-1.57947	0.000105968	0.00207032	yes	AT1G74750 (E=9e-265) | pentatricopeptide (PPR) repeat-containing protein	-	GO:0003674//molecular_function;GO:0005488//binding;GO:0005515//protein binding	-
Bra003807	350.333	65.3333	14.3333	2.63333	-2.44441	0.000193667	0.00345552	yes	AT1G74310 (E=0.0) ATHSP101, HSP101, HOT1 | ATHSP101 (ARABIDOPSIS THALIANA HEAT SHOCK PROTEIN 101); ATP binding / ATPase/ nucleoside-triphosphatase/ nucleotide binding / protein binding	-	GO:0003824//catalytic activity;GO:0097159//organic cyclic compound binding;GO:0036094//small molecule binding;GO:0003674//molecular_function;GO:1901265//nucleoside phosphate binding;GO:0000166//nucleotide binding;GO:1901363//heterocyclic compound binding;GO:0016787//hydrolase activity;GO:0005488//binding	GO:0008152//metabolic process;GO:0008150//biological_process;GO:0043170//macromolecule metabolic process;GO:0044238//primary metabolic process;GO:0019538//protein metabolic process;GO:0071704//organic substance metabolic process
Bra003817	15.3333	3.66667	1.76667	0.393333	-2.16721	0.00247241	0.0280405	yes	AT1G74090 (E=8e-064) SOT18, ATSOT18, ATST5B | SOT18 (DESULFO-GLUCOSINOLATE SULFOTRANSFERASE 18); 3-methylthiopropyl-desulfoglucosinolate sulfotransferase/ 4-methylthiobutyl-desulfoglucosinolate sulfotransferase/ 5-methylthiopentyl-desulfoglucosinolate sulfotransferase/ 7-methylthioheptyl-desulfogluco	-	GO:0003824//catalytic activity;GO:0003674//molecular_function;GO:0016740//transferase activity	-
Bra003834	1.33333	8.66667	0.1	0.593333	2.56884	0.00251101	0.0283643	yes	AT1G73670 (E=7e-252) ATMPK15 | ATMPK15; MAP kinase/ kinase	-	GO:0003674//molecular_function;GO:0000166//nucleotide binding;GO:0016740//transferase activity;GO:0016301//kinase activity;GO:0003824//catalytic activity;GO:0004871//signal transducer activity;GO:0036094//small molecule binding;GO:0016772//transferase activity, transferring phosphorus-containing groups;GO:1901363//heterocyclic compound binding;GO:0097159//organic cyclic compound binding;GO:000548…	GO:0036211//protein modification process;GO:0050789//regulation of biological process;GO:0043412//macromolecule modification;GO:0051716//cellular response to stimulus;GO:0007165//signal transduction;GO:0050896//response to stimulus;GO:0008150//biological_process;GO:0019538//protein metabolic process;GO:0044237//cellular metabolic process;GO:0009987//cellular process;GO:0043170//macromolecule meta…
Bra003835	10.3333	26.3333	1.58667	4.08333	1.36375	0.00449936	0.0447544	yes	AT1G73655 (E=3e-100) | FK506 binding / peptidyl-prolyl cis-trans isomerase	-	GO:0003674//molecular_function;GO:0003824//catalytic activity	GO:0044267//cellular protein metabolic process;GO:0044238//primary metabolic process;GO:0008150//biological_process;GO:0005975//carbohydrate metabolic process;GO:0043170//macromolecule metabolic process;GO:0071704//organic substance metabolic process;GO:0044237//cellular metabolic process;GO:0009987//cellular process;GO:0008152//metabolic process;GO:0044260//cellular macromolecule metabolic proce…
Bra003847	15.3333	0.333333	2.52	0.0466667	-5.75489	2.69671e-08	1.23921e-06	yes	-	-	-	-
Bra003850	398	62.6667	70.26	11.47	-2.61484	3.79971e-12	3.20745e-10	yes	AT1G73260 (E=5e-079) | trypsin and protease inhibitor family protein / Kunitz family protein	-	GO:0003674//molecular_function;GO:0098772//molecular function regulator;GO:0030234//enzyme regulator activity	GO:0071704//organic substance metabolic process;GO:0044238//primary metabolic process;GO:0008152//metabolic process;GO:0009987//cellular process;GO:0043170//macromolecule metabolic process;GO:0008150//biological_process;GO:0019538//protein metabolic process
Bra003859	140	0.666667	24.7367	0.11	-7.813	2.32877e-45	2.5836e-42	yes	AT1G73030 (E=7e-093) VPS46.2 | VPS46.2	-	-	GO:0006810//transport;GO:0051179//localization;GO:0051234//establishment of localization;GO:0008150//biological_process
Bra003860	184.333	0	9.93667	0.001	-13.2785	1.98291e-39	1.57941e-36	yes	-	-	-	-
Bra003864	24.3333	2.33333	2.04333	0.196667	-3.3771	1.05973e-08	5.39665e-07	yes	AT1G72890 (E=4e-128) | disease resistance protein (TIR-NBS class), putative	-	GO:1901265//nucleoside phosphate binding;GO:0005515//protein binding;GO:0003674//molecular_function;GO:0036094//small molecule binding;GO:0005488//binding;GO:0000166//nucleotide binding;GO:0097159//organic cyclic compound binding;GO:1901363//heterocyclic compound binding	GO:0023052//signaling;GO:0044699//single-organism process;GO:0008150//biological_process;GO:0050794//regulation of cellular process;GO:0050896//response to stimulus;GO:0051716//cellular response to stimulus;GO:0009987//cellular process;GO:0044763//single-organism cellular process;GO:0065007//biological regulation;GO:0050789//regulation of biological process;GO:0044700//single organism signaling;G…
Bra003869	116	23	7.84667	1.59333	-2.30003	9.87875e-10	6.02895e-08	yes	-	-	-	-
Bra003873	6.33333	0.666667	0.686667	0.0833333	-3.04264	0.0039482	0.040348	yes	-	-	-	-
Bra003897	87	3.66667	6.00667	0.253333	-4.56746	4.55213e-21	9.75222e-19	yes	AT1G72130 (E=1e-205) | proton-dependent oligopeptide transport (POT) family protein	GO:0005575//cellular_component;GO:0016020//membrane	GO:0003674//molecular_function;GO:0005215//transporter activity	GO:0008150//biological_process;GO:0051179//localization;GO:0051234//establishment of localization;GO:0006810//transport
Bra003898	125.667	2.66667	8.12333	0.18	-5.496	9.76035e-37	6.45097e-34	yes	AT1G72125 (E=1e-226) | transporter	GO:0005575//cellular_component;GO:0016020//membrane	GO:0003674//molecular_function;GO:0005215//transporter activity	GO:0006810//transport;GO:0008150//biological_process;GO:0051179//localization;GO:0051234//establishment of localization
Bra003899	68.6667	19.3333	6.6	1.81	-1.86648	6.96485e-07	2.46982e-05	yes	AT1G72050 (E=8e-124) TFIIIA | TFIIIA (TRANSCRIPTION FACTOR IIIA); 5S rDNA binding / 5S rRNA binding / nucleic acid binding / transcription factor/ zinc ion binding	-	GO:0005488//binding;GO:0003676//nucleic acid binding;GO:1901363//heterocyclic compound binding;GO:0003674//molecular_function;GO:0097159//organic cyclic compound binding	-
Bra003909	60.3333	11.3333	4.71667	0.856667	-2.46096	3.59774e-06	0.000106034	yes	AT2G46960 (E=8e-132) CYP709B1 | CYP709B1; electron carrier/ heme binding / iron ion binding / monooxygenase/ oxygen binding	-	GO:0003674//molecular_function;GO:0003824//catalytic activity;GO:0005488//binding	GO:0008150//biological_process;GO:0008152//metabolic process
Bra003918	10	1.33333	1.02	0.113333	-3.16993	0.000513227	0.00780366	yes	AT1G71695 (E=7e-175) | peroxidase 12 (PER12) (P12) (PRXR6)	-	GO:0003674//molecular_function;GO:0003824//catalytic activity;GO:0005488//binding	GO:0008150//biological_process;GO:0050896//response to stimulus;GO:0006950//response to stress;GO:0008152//metabolic process
Bra003925	0.333333	6.33333	0.0133333	0.263333	4.30378	0.00411527	0.041695	yes	AT1G71400 (E=9e-238) AtRLP12 | AtRLP12 (Receptor Like Protein 12); protein binding	-	GO:0005488//binding;GO:0003674//molecular_function;GO:0005515//protein binding	-
Bra003953	87.6667	20.3333	6.99333	1.65333	-2.0806	7.36031e-10	4.60042e-08	yes	AT3G29670 (E=3e-158) | transferase family protein	-	GO:0016740//transferase activity;GO:0003824//catalytic activity;GO:0003674//molecular_function	-
Bra003954	0.333333	12	0.0666667	2.46667	5.20945	3.3627e-06	0.000100056	yes	AT1G70490 (E=6e-095) ATARFA1D, ARFA1D | ARFA1D; GTP binding / phospholipase activator/ protein binding	GO:0005622//intracellular;GO:0005575//cellular_component;GO:0044464//cell part;GO:0005623//cell	GO:1901363//heterocyclic compound binding;GO:0003674//molecular_function;GO:0097159//organic cyclic compound binding;GO:0005488//binding;GO:0000166//nucleotide binding;GO:1901265//nucleoside phosphate binding;GO:0036094//small molecule binding	GO:0008150//biological_process;GO:0044699//single-organism process;GO:0023052//signaling;GO:0051716//cellular response to stimulus;GO:0050789//regulation of biological process;GO:0044700//single organism signaling;GO:0065007//biological regulation;GO:0007154//cell communication;GO:0044763//single-organism cellular process;GO:0009987//cellular process;GO:0007165//signal transduction;GO:0050794//re…
Bra003962	106.667	42	7.7	2.89333	-1.41213	4.41302e-05	0.000974314	yes	AT1G70200 (E=2e-081) | RNA recognition motif (RRM)-containing protein	GO:0005575//cellular_component;GO:0005737//cytoplasm;GO:0043229//intracellular organelle;GO:0044444//cytoplasmic part;GO:0043226//organelle;GO:0043231//intracellular membrane-bounded organelle;GO:0005622//intracellular;GO:0005623//cell;GO:0044424//intracellular part;GO:0043227//membrane-bounded organelle;GO:0009536//plastid;GO:0044464//cell part	GO:0000166//nucleotide binding;GO:0003674//molecular_function;GO:0036094//small molecule binding;GO:0097159//organic cyclic compound binding;GO:0005488//binding;GO:1901265//nucleoside phosphate binding;GO:0003676//nucleic acid binding;GO:1901363//heterocyclic compound binding	GO:1901360//organic cyclic compound metabolic process;GO:0008152//metabolic process;GO:0034641//cellular nitrogen compound metabolic process;GO:0071840//cellular component organization or biogenesis;GO:0016043//cellular component organization;GO:0051179//localization;GO:0044238//primary metabolic process;GO:0006810//transport;GO:0009987//cellular process;GO:0046483//heterocycle metabolic process;…
Bra003965	18.6667	5.33333	1.76667	0.493333	-1.8404	0.000546287	0.00820593	yes	AT1G70170 (E=5e-198) MMP | MMP (MATRIX METALLOPROTEINASE); metalloendopeptidase/ metallopeptidase	GO:0005575//cellular_component	GO:0016787//hydrolase activity;GO:0003674//molecular_function;GO:0003824//catalytic activity;GO:0005488//binding	GO:0071704//organic substance metabolic process;GO:0043170//macromolecule metabolic process;GO:0044238//primary metabolic process;GO:0008152//metabolic process;GO:0019538//protein metabolic process;GO:0008150//biological_process
Bra003969	17.3333	3.33333	2.54	0.52	-2.28824	0.000396982	0.00632403	yes	AT1G70000 (E=2e-082) | DNA-binding family protein	-	GO:0003674//molecular_function;GO:0005488//binding;GO:1901363//heterocyclic compound binding;GO:0003682//chromatin binding;GO:0097159//organic cyclic compound binding;GO:0003677//DNA binding;GO:0003676//nucleic acid binding;GO:0044877//macromolecular complex binding	-
Bra003975	11.3333	44.3333	1.37667	5.74667	2.06155	0.000775451	0.0109821	yes	-	-	-	-
Bra003981	94.6667	197.333	18.8167	39.01	1.05183	0.000435454	0.00680431	yes	-	-	-	-
Bra003988	166	20.3333	12.36	1.56333	-2.98298	9.7473e-16	1.28301e-13	yes	-	-	-	-
Bra004004	50.3333	22.6667	5.26667	2.33333	-1.1745	0.000542459	0.00816296	yes	AT1G69260 (E=3e-084) AFP1 | AFP1 (ABI FIVE BINDING PROTEIN)	-	-	GO:0008150//biological_process;GO:0023052//signaling;GO:0009987//cellular process;GO:0051716//cellular response to stimulus;GO:0044700//single organism signaling;GO:0044699//single-organism process;GO:0044763//single-organism cellular process;GO:0050896//response to stimulus;GO:0050794//regulation of cellular process;GO:0050789//regulation of biological process;GO:0065007//biological regulation;G…
Bra004024	1.66667	25.6667	0.386667	5.56	3.84592	4.30967e-08	1.90978e-06	yes	AT1G68660 (E=7e-080) | FUNCTIONS IN: molecular_function unknown; INVOLVED IN: protein catabolic process; EXPRESSED IN: 23 plant structures; EXPRESSED DURING: 14 growth stages; CONTAINS InterPro DOMAIN/s: Adaptor protein ClpS, core (InterPro:IPR003769), Ribosomal protein L7/L12, C-terminal/adaptor protein ClpS-like (InterPro:IPR014719); Has 513 Blast hits to 513 proteins in 129 species: Archae - 0…	-	-	GO:0019538//protein metabolic process;GO:0008150//biological_process;GO:0071704//organic substance metabolic process;GO:0044238//primary metabolic process;GO:0008152//metabolic process;GO:0009056//catabolic process;GO:0043170//macromolecule metabolic process
Bra004026	32.6667	9	3.53333	1.05667	-1.74151	0.00133811	0.0170144	yes	AT1G68620 (E=4e-151) | hydrolase	-	GO:0003824//catalytic activity;GO:0016787//hydrolase activity;GO:0003674//molecular_function	GO:0008150//biological_process;GO:0008152//metabolic process
Bra004029	173.667	435	10.0933	25.6133	1.34349	6.86146e-10	4.30595e-08	yes	AT1G68580 (E=3e-134) | agenet domain-containing protein / bromo-adjacent homology (BAH) domain-containing protein	-	GO:0003682//chromatin binding;GO:0005488//binding;GO:0003677//DNA binding;GO:0003674//molecular_function;GO:0044877//macromolecular complex binding;GO:1901363//heterocyclic compound binding;GO:0097159//organic cyclic compound binding;GO:0003676//nucleic acid binding	-
Bra004030	7.33333	0.333333	0.443333	0.02	-4.47032	0.000111846	0.00216742	yes	AT1G68570 (E=1e-299) | proton-dependent oligopeptide transport (POT) family protein	GO:0005575//cellular_component;GO:0016020//membrane	GO:0005215//transporter activity;GO:0003674//molecular_function	GO:0051179//localization;GO:0008150//biological_process;GO:0006810//transport;GO:0051234//establishment of localization
Bra004033	49.6667	153	5.69667	17.5067	1.61971	8.16689e-10	5.04366e-08	yes	AT1G68550 (E=4e-070) | AP2 domain-containing transcription factor, putative	GO:0043231//intracellular membrane-bounded organelle;GO:0044424//intracellular part;GO:0005622//intracellular;GO:0043227//membrane-bounded organelle;GO:0005575//cellular_component;GO:0043226//organelle;GO:0044464//cell part;GO:0043229//intracellular organelle;GO:0005634//nucleus;GO:0005623//cell	GO:1901363//heterocyclic compound binding;GO:0097159//organic cyclic compound binding;GO:0003700//transcription factor activity, sequence-specific DNA binding;GO:0003674//molecular_function;GO:0003676//nucleic acid binding;GO:0001071//nucleic acid binding transcription factor activity;GO:0003677//DNA binding;GO:0005488//binding	GO:0009058//biosynthetic process;GO:0008150//biological_process;GO:0034641//cellular nitrogen compound metabolic process;GO:0006139//nucleobase-containing compound metabolic process;GO:0044238//primary metabolic process;GO:0009987//cellular process;GO:0071704//organic substance metabolic process;GO:0006725//cellular aromatic compound metabolic process;GO:1901360//organic cyclic compound metabolic…
Bra004036	118	57	24.02	11.61	-1.04887	7.47702e-05	0.00153514	yes	-	-	-	-
Bra004052	27.3333	1	2.74	0.0866667	-4.98255	8.56801e-12	6.93116e-10	yes	-	-	-	-
Bra004053	269.667	88.6667	15.98	5.28333	-1.59675	1.75341e-08	8.41853e-07	yes	AT1G68060 (E=4e-242) ATMAP70-1 | ATMAP70-1 (microtubule-associated proteins 70-1); microtubule binding	-	GO:0005488//binding;GO:0003674//molecular_function;GO:0005515//protein binding	GO:0008150//biological_process;GO:0009987//cellular process;GO:0071840//cellular component organization or biogenesis;GO:0016043//cellular component organization
Bra004075	208.667	26.6667	38.0833	4.69667	-3.01945	4.06106e-16	5.50886e-14	yes	AT1G67740 (E=5e-053) PSBY, YCF32 | PSBY	GO:0005622//intracellular;GO:0005623//cell;GO:0044464//cell part;GO:0009579//thylakoid;GO:0005575//cellular_component;GO:0016020//membrane;GO:0044424//intracellular part	GO:0003674//molecular_function;GO:0005488//binding	GO:0008150//biological_process;GO:0008152//metabolic process;GO:0015979//photosynthesis;GO:0009987//cellular process;GO:0044237//cellular metabolic process
Bra004079	55	24	3.11667	1.34333	-1.21419	0.000843596	0.0117146	yes	AT1G67680 (E=2e-274) | 7S RNA binding	GO:0005575//cellular_component;GO:0005622//intracellular;GO:0044424//intracellular part;GO:0005623//cell;GO:0044464//cell part;GO:0005737//cytoplasm	GO:0005488//binding;GO:0097159//organic cyclic compound binding;GO:0003676//nucleic acid binding;GO:0003674//molecular_function;GO:1901363//heterocyclic compound binding;GO:0005515//protein binding;GO:0003723//RNA binding	GO:0051234//establishment of localization;GO:0051179//localization;GO:0071840//cellular component organization or biogenesis;GO:0008150//biological_process;GO:0006810//transport;GO:0016043//cellular component organization;GO:0009987//cellular process
Bra004093	6	18	0.763333	2.26667	1.57019	0.00438228	0.0438593	yes	AT1G67330 (E=4e-140) | unknown protein	-	-	GO:0009058//biosynthetic process;GO:0008152//metabolic process;GO:0008150//biological_process;GO:0005975//carbohydrate metabolic process;GO:0044238//primary metabolic process;GO:0071704//organic substance metabolic process;GO:0009987//cellular process
Bra004098	20.3333	63.6667	5.17667	16.41	1.66448	2.86354e-06	8.66989e-05	yes	AT1G67250 (E=2e-068) | proteasome maturation factor UMP1 family protein	-	-	GO:0009987//cellular process;GO:0016043//cellular component organization;GO:0071840//cellular component organization or biogenesis;GO:0008150//biological_process
Bra004121	45.3333	13.6667	3.14333	0.946667	-1.73137	0.000280689	0.00473104	yes	AT1G65590 (E=6e-265) HEXO3, ATHEX1 | HEXO3 (BETA-HEXOSAMINIDASE 3); beta-N-acetylhexosaminidase/ hexosaminidase	GO:0071944//cell periphery;GO:0030312//external encapsulating structure;GO:0016020//membrane;GO:0005886//plasma membrane;GO:0005618//cell wall;GO:0005575//cellular_component;GO:0005623//cell;GO:0044464//cell part	GO:0003674//molecular_function;GO:0016787//hydrolase activity;GO:0003824//catalytic activity	GO:0044238//primary metabolic process;GO:0071704//organic substance metabolic process;GO:0008150//biological_process;GO:0005975//carbohydrate metabolic process;GO:0008152//metabolic process
Bra004126	368.333	745	72.5633	146.893	1.01746	1.79997e-07	7.19616e-06	yes	-	-	-	-
Bra004167	28	7.33333	2.05667	0.536667	-1.93821	2.81832e-05	0.000659746	yes	AT1G66460 (E=1e-113) | protein kinase family protein	-	GO:0097159//organic cyclic compound binding;GO:0016772//transferase activity, transferring phosphorus-containing groups;GO:0005488//binding;GO:0003824//catalytic activity;GO:0016301//kinase activity;GO:0003674//molecular_function;GO:0016740//transferase activity;GO:1901265//nucleoside phosphate binding;GO:1901363//heterocyclic compound binding;GO:0036094//small molecule binding;GO:0000166//nucleo…	GO:0071704//organic substance metabolic process;GO:0043170//macromolecule metabolic process;GO:0009987//cellular process;GO:0036211//protein modification process;GO:0043412//macromolecule modification;GO:0008152//metabolic process;GO:0044267//cellular protein metabolic process;GO:0044237//cellular metabolic process;GO:0008150//biological_process;GO:0006464//cellular protein modification process;G…
Bra004171	166.333	33.6667	26.8	5.4	-2.3112	1.69017e-08	8.1654e-07	yes	AT1G66500 (E=3e-051) | zinc finger (C2H2-type) family protein	-	GO:0005488//binding;GO:0003674//molecular_function	-
Bra004172	82.6667	7.66667	8.14333	0.696667	-3.54708	2.78348e-11	2.11408e-09	yes	AT1G66510 (E=8e-124) | AAR2 protein family	-	-	GO:0009987//cellular process;GO:0050896//response to stimulus;GO:0044238//primary metabolic process;GO:0044763//single-organism cellular process;GO:0044699//single-organism process;GO:0006950//response to stress;GO:0044237//cellular metabolic process;GO:0009628//response to abiotic stimulus;GO:0008150//biological_process;GO:0034641//cellular nitrogen compound metabolic process;GO:0006139//nucleob…
Bra004179	502	0	32.5467	0.001	-14.9902	8.7447e-91	5.43291e-87	yes	AT4G21380 (E=5e-176) ARK3 | ARK3 (A. THALIANA RECEPTOR KINASE 3); kinase/ transmembrane receptor protein serine/threonine kinase	-	GO:0016740//transferase activity;GO:0003674//molecular_function;GO:0003824//catalytic activity;GO:0016301//kinase activity;GO:0016772//transferase activity, transferring phosphorus-containing groups	GO:0022414//reproductive process;GO:0044706//multi-multicellular organism process;GO:0044699//single-organism process;GO:0000003//reproduction;GO:0009856//pollination;GO:0044763//single-organism cellular process;GO:0009875//pollen-pistil interaction;GO:0044703//multi-organism reproductive process;GO:0009987//cellular process;GO:0032501//multicellular organismal process;GO:0051704//multi-organism …
Bra004180	5	0	0.623333	0.001	-9.28386	0.000503604	0.00769501	yes	AT4G21380 (E=4e-136) ARK3 | ARK3 (A. THALIANA RECEPTOR KINASE 3); kinase/ transmembrane receptor protein serine/threonine kinase	-	GO:1901265//nucleoside phosphate binding;GO:0005488//binding;GO:0000166//nucleotide binding;GO:0097159//organic cyclic compound binding;GO:0036094//small molecule binding;GO:0016301//kinase activity;GO:0016772//transferase activity, transferring phosphorus-containing groups;GO:0003824//catalytic activity;GO:0016740//transferase activity;GO:0003674//molecular_function;GO:1901363//heterocyclic comp…	GO:0006464//cellular protein modification process;GO:0044237//cellular metabolic process;GO:0036211//protein modification process;GO:0043412//macromolecule modification;GO:0008152//metabolic process;GO:0044267//cellular protein metabolic process;GO:0044238//primary metabolic process;GO:0019538//protein metabolic process;GO:0043170//macromolecule metabolic process;GO:0071704//organic substance met…
Bra004185	98.6667	1	3.31	0.0366667	-6.49622	1.30572e-34	7.243e-32	yes	AT1G66730 (E=9e-181) | ATP dependent DNA ligase family protein	-	GO:1901265//nucleoside phosphate binding;GO:0097159//organic cyclic compound binding;GO:0016787//hydrolase activity;GO:0005488//binding;GO:0036094//small molecule binding;GO:0000166//nucleotide binding;GO:0003674//molecular_function;GO:0003824//catalytic activity;GO:1901363//heterocyclic compound binding	GO:0009987//cellular process;GO:0044260//cellular macromolecule metabolic process;GO:0008152//metabolic process;GO:0046483//heterocycle metabolic process;GO:0044238//primary metabolic process;GO:0044237//cellular metabolic process;GO:0006950//response to stress;GO:0008150//biological_process;GO:0034641//cellular nitrogen compound metabolic process;GO:0006139//nucleobase-containing compound metabo…
Bra004187	21	7.66667	0.856667	0.31	-1.46647	0.00490728	0.0479275	yes	AT1G64820 (E=5e-149) | MATE efflux family protein	GO:0016020//membrane;GO:0005575//cellular_component	GO:0005215//transporter activity;GO:0003674//molecular_function	GO:0009987//cellular process;GO:0006810//transport;GO:0051179//localization;GO:0008150//biological_process;GO:0051234//establishment of localization
Bra004188	53.3333	10.6667	4.1	0.853333	-2.26444	4.43944e-08	1.96169e-06	yes	AT1G66760 (E=3e-159) | MATE efflux family protein	GO:0016020//membrane;GO:0005575//cellular_component	GO:0003674//molecular_function;GO:0005215//transporter activity	GO:0051234//establishment of localization;GO:0006810//transport;GO:0051179//localization;GO:0009987//cellular process;GO:0008150//biological_process
Bra004195	0	28.3267	0.001	1.60667	10.6499	2.80806e-13	2.78689e-11	yes	AT1G66880 (E=2e-165) | serine/threonine protein kinase family protein	-	GO:0016740//transferase activity;GO:0000166//nucleotide binding;GO:0016772//transferase activity, transferring phosphorus-containing groups;GO:0003674//molecular_function;GO:0003824//catalytic activity;GO:0036094//small molecule binding;GO:1901363//heterocyclic compound binding;GO:0005488//binding;GO:0016301//kinase activity;GO:1901265//nucleoside phosphate binding;GO:0097159//organic cyclic comp…	GO:0043170//macromolecule metabolic process;GO:0071704//organic substance metabolic process;GO:0009987//cellular process;GO:0044267//cellular protein metabolic process;GO:0019538//protein metabolic process;GO:0044238//primary metabolic process;GO:0008150//biological_process;GO:0006464//cellular protein modification process;GO:0036211//protein modification process;GO:0008152//metabolic process;GO:…
Bra004220	16.3333	49.6667	1.61	4.80333	1.57698	2.40629e-05	0.000579001	yes	AT1G67340 (E=2e-176) | zinc finger (MYND type) family protein / F-box family protein	-	GO:0003674//molecular_function;GO:0005515//protein binding;GO:0005488//binding	-
Bra004227	53	133.667	5.11667	13.0067	1.34598	1.42677e-06	4.64583e-05	yes	AT1G67480 (E=4e-183) | kelch repeat-containing F-box family protein	-	GO:0005515//protein binding;GO:0003674//molecular_function;GO:0005488//binding	-
Bra004241	45.3333	7	4.17	0.613333	-2.7653	1.73397e-08	8.33811e-07	yes	AT1G67660 (E=5e-102) | DNA binding / nuclease	-	GO:0097159//organic cyclic compound binding;GO:0016787//hydrolase activity;GO:0003677//DNA binding;GO:0004518//nuclease activity;GO:0005488//binding;GO:0003676//nucleic acid binding;GO:0003824//catalytic activity;GO:1901363//heterocyclic compound binding;GO:0016788//hydrolase activity, acting on ester bonds;GO:0003674//molecular_function	GO:1901360//organic cyclic compound metabolic process;GO:0008152//metabolic process;GO:0071704//organic substance metabolic process;GO:0044237//cellular metabolic process;GO:0046483//heterocycle metabolic process;GO:0006807//nitrogen compound metabolic process;GO:0008150//biological_process;GO:0006725//cellular aromatic compound metabolic process;GO:0006139//nucleobase-containing compound metabol…
Bra004246	7.33333	1	0.56	0.0733333	-2.93289	0.00178659	0.0213433	yes	AT1G50990 (E=3e-176) | protein kinase-related	-	GO:0097159//organic cyclic compound binding;GO:0003674//molecular_function;GO:0000166//nucleotide binding;GO:0016301//kinase activity;GO:0005515//protein binding;GO:0036094//small molecule binding;GO:0016772//transferase activity, transferring phosphorus-containing groups;GO:0003824//catalytic activity;GO:0016740//transferase activity;GO:0005488//binding;GO:1901265//nucleoside phosphate binding;G…	GO:0006464//cellular protein modification process;GO:0019538//protein metabolic process;GO:0009987//cellular process;GO:0044238//primary metabolic process;GO:0044260//cellular macromolecule metabolic process;GO:0008152//metabolic process;GO:0043170//macromolecule metabolic process;GO:0044267//cellular protein metabolic process;GO:0071704//organic substance metabolic process;GO:0036211//protein mo…
Bra004250	17.3333	4	2.48	0.556667	-2.15545	0.000267763	0.00454276	yes	-	-	-	-
Bra004251	1119	401.333	129.19	45.5967	-1.50249	8.51219e-08	3.58296e-06	yes	AT1G67730 (E=4e-164) YBR159, KCR1 | YBR159; ketoreductase/ oxidoreductase	-	GO:0003824//catalytic activity;GO:0003674//molecular_function	GO:0008150//biological_process;GO:0008152//metabolic process
Bra004252	61	18.6667	11.88	3.45667	-1.78108	0.00225868	0.0261414	yes	AT1G67740 (E=1e-047) PSBY, YCF32 | PSBY	GO:0005623//cell;GO:0005622//intracellular;GO:0005575//cellular_component;GO:0009579//thylakoid;GO:0044424//intracellular part;GO:0044464//cell part;GO:0016020//membrane	GO:0003674//molecular_function;GO:0005488//binding	GO:0015979//photosynthesis;GO:0008152//metabolic process;GO:0008150//biological_process;GO:0044237//cellular metabolic process;GO:0009987//cellular process
Bra004260	64.3333	140.333	5.26	11.37	1.1121	1.02466e-05	0.000269592	yes	AT1G67800 (E=5e-182) | copine-related	-	GO:0005488//binding;GO:0005515//protein binding;GO:0003674//molecular_function	GO:0043412//macromolecule modification;GO:0050789//regulation of biological process;GO:0065007//biological regulation;GO:0044699//single-organism process;GO:0036211//protein modification process;GO:0006464//cellular protein modification process;GO:0044700//single organism signaling;GO:0008150//biological_process;GO:0044267//cellular protein metabolic process;GO:0050896//response to stimulus;GO:00…
Bra004262	78.6667	2	7.23667	0.196667	-5.2015	7.21788e-25	1.98422e-22	yes	-	-	-	-
Bra004271	9.33333	1.33333	1.28333	0.17	-2.91629	0.00100802	0.0135261	yes	AT1G67940 (E=2e-127) ATNAP3 | ATNAP3; transporter	GO:0005623//cell;GO:0016020//membrane;GO:0005575//cellular_component;GO:0043226//organelle;GO:0043231//intracellular membrane-bounded organelle;GO:0044444//cytoplasmic part;GO:0005622//intracellular;GO:0005773//vacuole;GO:0044424//intracellular part;GO:0005886//plasma membrane;GO:0043229//intracellular organelle;GO:0005737//cytoplasm;GO:0044464//cell part;GO:0071944//cell periphery;GO:0043227//me…	GO:1901363//heterocyclic compound binding;GO:0005488//binding;GO:0003674//molecular_function;GO:0036094//small molecule binding;GO:0016787//hydrolase activity;GO:0005215//transporter activity;GO:0097159//organic cyclic compound binding;GO:1901265//nucleoside phosphate binding;GO:0000166//nucleotide binding;GO:0003824//catalytic activity	GO:0006810//transport;GO:0051179//localization;GO:0051234//establishment of localization;GO:0008150//biological_process
Bra004272	50.6667	19	4.92	1.74	-1.49957	0.00127054	0.0162889	yes	AT1G67970 (E=1e-136) AT-HSFA8, HSFA8 | AT-HSFA8; DNA binding / transcription factor	GO:0043231//intracellular membrane-bounded organelle;GO:0043229//intracellular organelle;GO:0044464//cell part;GO:0005634//nucleus;GO:0043226//organelle;GO:0005622//intracellular;GO:0043227//membrane-bounded organelle;GO:0005623//cell;GO:0044424//intracellular part;GO:0005575//cellular_component	GO:0005488//binding;GO:0001071//nucleic acid binding transcription factor activity;GO:0003700//transcription factor activity, sequence-specific DNA binding;GO:0003674//molecular_function;GO:0097159//organic cyclic compound binding;GO:1901363//heterocyclic compound binding;GO:0003676//nucleic acid binding;GO:0003677//DNA binding	GO:0050896//response to stimulus;GO:0071704//organic substance metabolic process;GO:0008152//metabolic process;GO:0006725//cellular aromatic compound metabolic process;GO:0006139//nucleobase-containing compound metabolic process;GO:1901360//organic cyclic compound metabolic process;GO:0044238//primary metabolic process;GO:0046483//heterocycle metabolic process;GO:0009058//biosynthetic process;GO:…
Bra004274	28.9667	10.3433	4.56667	1.61333	-1.5011	0.000537091	0.00809912	yes	AT1G68000 (E=3e-108) ATPIS1, ATPIS | ATPIS1 (PHOSPHATIDYLINOSITOL SYNTHASE 1); CDP-diacylglycerol-inositol 3-phosphatidyltransferase	GO:0005575//cellular_component;GO:0016020//membrane	GO:0003674//molecular_function;GO:0016740//transferase activity;GO:0003824//catalytic activity	GO:0006629//lipid metabolic process;GO:0044238//primary metabolic process;GO:0008150//biological_process;GO:0071704//organic substance metabolic process;GO:0044699//single-organism process;GO:0008152//metabolic process;GO:0044710//single-organism metabolic process;GO:0009058//biosynthetic process;GO:0009987//cellular process
Bra004275	46	17	4.36667	1.58	-1.46661	0.00175099	0.0209768	yes	AT1G68010 (E=9e-208) HPR | HPR; glycerate dehydrogenase/ poly(U) binding	-	GO:0005488//binding;GO:0097159//organic cyclic compound binding;GO:0003824//catalytic activity;GO:0000166//nucleotide binding;GO:0003674//molecular_function;GO:0036094//small molecule binding;GO:1901265//nucleoside phosphate binding;GO:1901363//heterocyclic compound binding	GO:0008152//metabolic process;GO:0008150//biological_process
Bra004284	221.667	77.6667	24.43	8.53333	-1.51747	6.43555e-11	4.67089e-09	yes	-	-	-	-
Bra004299	10	0	2.00333	0.001	-10.9682	7.36414e-06	0.000201728	yes	-	-	-	-
Bra004310	310.667	58.6667	24.22	4.58333	-2.40173	2.66924e-19	4.65828e-17	yes	-	-	-	-
Bra004318	30	89.3333	3.48	10.5833	1.60463	2.39118e-06	7.38365e-05	yes	AT1G68550 (E=2e-057) | AP2 domain-containing transcription factor, putative	GO:0043227//membrane-bounded organelle;GO:0005575//cellular_component;GO:0005634//nucleus;GO:0043231//intracellular membrane-bounded organelle;GO:0005623//cell;GO:0044464//cell part;GO:0043229//intracellular organelle;GO:0044424//intracellular part;GO:0005622//intracellular;GO:0043226//organelle	GO:0003674//molecular_function;GO:0097159//organic cyclic compound binding;GO:0003677//DNA binding;GO:1901363//heterocyclic compound binding;GO:0003676//nucleic acid binding;GO:0001071//nucleic acid binding transcription factor activity;GO:0005488//binding;GO:0003700//transcription factor activity, sequence-specific DNA binding	GO:0009058//biosynthetic process;GO:0008152//metabolic process;GO:0009987//cellular process;GO:0046483//heterocycle metabolic process;GO:0006139//nucleobase-containing compound metabolic process;GO:0006807//nitrogen compound metabolic process;GO:1901360//organic cyclic compound metabolic process;GO:0044237//cellular metabolic process;GO:0044238//primary metabolic process;GO:0071704//organic subst…
Bra004319	1069.38	18.19	41.2533	0.72	-5.84037	4.67244e-78	1.20954e-74	yes	AT1G68560 (E=0.0) ATXYL1, XYL1 | XYL1 (ALPHA-XYLOSIDASE 1); alpha-N-arabinofuranosidase/ hydrolase, hydrolyzing O-glycosyl compounds / xylan 1,4-beta-xylosidase	-	GO:0003674//molecular_function;GO:0030246//carbohydrate binding;GO:0003824//catalytic activity;GO:0005488//binding;GO:0016787//hydrolase activity	GO:0008152//metabolic process;GO:0005975//carbohydrate metabolic process;GO:0071704//organic substance metabolic process;GO:0008150//biological_process;GO:0044238//primary metabolic process
Bra004323	13	1.66667	2.83	0.33	-3.10026	0.000144413	0.00268948	yes	AT1G68590 (E=1e-067) | plastid-specific 30S ribosomal protein 3, putative / PSRP-3, putative	GO:0005840//ribosome;GO:0044464//cell part;GO:0005622//intracellular;GO:0030529//intracellular ribonucleoprotein complex;GO:0005575//cellular_component;GO:0005737//cytoplasm;GO:0043232//intracellular non-membrane-bounded organelle;GO:0044424//intracellular part;GO:0032991//macromolecular complex;GO:0043229//intracellular organelle;GO:1990904//ribonucleoprotein complex;GO:0044444//cytoplasmic part…	GO:0003674//molecular_function;GO:0005198//structural molecule activity	GO:0043043//peptide biosynthetic process;GO:0006518//peptide metabolic process;GO:0044249//cellular biosynthetic process;GO:0044260//cellular macromolecule metabolic process;GO:0019538//protein metabolic process;GO:0006412//translation;GO:0034641//cellular nitrogen compound metabolic process;GO:0044267//cellular protein metabolic process;GO:0010467//gene expression;GO:0009987//cellular process;GO…
Bra004330	28.6667	3.33333	2.96	0.343333	-3.10792	2.15571e-07	8.46588e-06	yes	AT1G68670 (E=1e-087) | myb family transcription factor	-	GO:0003676//nucleic acid binding;GO:1901363//heterocyclic compound binding;GO:0003682//chromatin binding;GO:0097159//organic cyclic compound binding;GO:0044877//macromolecular complex binding;GO:0005488//binding;GO:0003674//molecular_function;GO:0003677//DNA binding	-
Bra004331	56	14.3333	2.35	0.6	-1.96963	7.39217e-08	3.14994e-06	yes	AT1G68690 (E=7e-207) | ATP binding / protein kinase/ protein serine/threonine kinase	-	GO:0016301//kinase activity;GO:0097159//organic cyclic compound binding;GO:1901363//heterocyclic compound binding;GO:0036094//small molecule binding;GO:0003824//catalytic activity;GO:0016740//transferase activity;GO:0003674//molecular_function;GO:0005488//binding;GO:0000166//nucleotide binding;GO:1901265//nucleoside phosphate binding;GO:0016772//transferase activity, transferring phosphorus-conta…	GO:0019538//protein metabolic process;GO:0044238//primary metabolic process;GO:0044267//cellular protein metabolic process;GO:0006464//cellular protein modification process;GO:0009987//cellular process;GO:0008150//biological_process;GO:0043412//macromolecule modification;GO:0044260//cellular macromolecule metabolic process;GO:0008152//metabolic process;GO:0071704//organic substance metabolic proc…
Bra004336	14.6667	43.6667	1.23	3.44	1.48375	0.00400918	0.0408198	yes	AT1G68780 (E=1e-199) | leucine-rich repeat family protein	-	-	GO:0023052//signaling;GO:0009791//post-embryonic development;GO:0065007//biological regulation;GO:0048731//system development;GO:0007154//cell communication;GO:0044763//single-organism cellular process;GO:0000003//reproduction;GO:0048367//shoot system development;GO:0044700//single organism signaling;GO:0050789//regulation of biological process;GO:0051716//cellular response to stimulus;GO:0048856…
Bra004348	70.6667	216	5.42333	16.19	1.57785	2.31243e-10	1.5448e-08	yes	AT1G68920 (E=1e-163) | basic helix-loop-helix (bHLH) family protein	-	GO:0005515//protein binding;GO:0005488//binding;GO:0003674//molecular_function	-
Bra004356	39	81	1.84	3.77	1.03486	0.00245468	0.0279005	yes	AT1G69020 (E=1e-144) | prolyl oligopeptidase family protein	GO:0009536//plastid;GO:0044424//intracellular part;GO:0043227//membrane-bounded organelle;GO:0043231//intracellular membrane-bounded organelle;GO:0005623//cell;GO:0005622//intracellular;GO:0044464//cell part;GO:0005737//cytoplasm;GO:0043226//organelle;GO:0005575//cellular_component;GO:0044444//cytoplasmic part;GO:0043229//intracellular organelle	GO:0003674//molecular_function;GO:0005488//binding;GO:0005515//protein binding;GO:0003824//catalytic activity;GO:0016787//hydrolase activity	GO:0019538//protein metabolic process;GO:0044238//primary metabolic process;GO:0071704//organic substance metabolic process;GO:0043170//macromolecule metabolic process;GO:0008150//biological_process;GO:0008152//metabolic process
Bra004359	46	16.3333	10.43	3.76333	-1.47066	9.21099e-05	0.0018377	yes	AT1G69060 (E=1e-042) | heat shock protein binding	GO:0016020//membrane;GO:0005575//cellular_component;GO:0044424//intracellular part;GO:0043227//membrane-bounded organelle;GO:0005623//cell;GO:0005622//intracellular;GO:0043231//intracellular membrane-bounded organelle;GO:0044464//cell part;GO:0043229//intracellular organelle;GO:0005773//vacuole;GO:0044444//cytoplasmic part;GO:0043226//organelle;GO:0005737//cytoplasm	-	-
Bra004363	9	0.666667	1.07667	0.08	-3.75043	0.000101846	0.0020011	yes	AT1G69170 (E=7e-043) | squamosa promoter-binding protein-like 6 (SPL6)	GO:0005622//intracellular;GO:0005634//nucleus;GO:0044424//intracellular part;GO:0005575//cellular_component;GO:0005623//cell;GO:0043226//organelle;GO:0043231//intracellular membrane-bounded organelle;GO:0044464//cell part;GO:0043227//membrane-bounded organelle;GO:0043229//intracellular organelle	GO:0003677//DNA binding;GO:0003674//molecular_function;GO:0097159//organic cyclic compound binding;GO:0003676//nucleic acid binding;GO:0005488//binding;GO:1901363//heterocyclic compound binding	-
Bra004376	16.3333	0.333333	1.76667	0.04	-5.46489	2.0204e-08	9.52376e-07	yes	AT1G69370 (E=5e-106) CM3, cm-3 | CM3 (chorismate mutase 3); chorismate mutase	-	GO:0003674//molecular_function;GO:0003824//catalytic activity	GO:0008150//biological_process;GO:0009058//biosynthetic process;GO:0009987//cellular process;GO:0008152//metabolic process
Bra004377	12.6667	43.6667	1.25667	3.98333	1.66437	0.00187372	0.0222498	yes	-	-	-	-
Bra004378	29.3333	75.3333	4.76667	12.3233	1.37034	2.19426e-05	0.00053587	yes	AT1G69390 (E=5e-098) ATMINE1 | ATMINE1 (Arabidopsis homologue of bacterial MinE 1); protein binding	-	-	GO:0008150//biological_process;GO:0016043//cellular component organization;GO:0009987//cellular process;GO:0071840//cellular component organization or biogenesis;GO:0044699//single-organism process;GO:0044763//single-organism cellular process;GO:0007049//cell cycle
Bra004379	57.6667	200	13.1067	44.3133	1.75744	2.67844e-09	1.53514e-07	yes	AT1G69410 (E=2e-086) ATELF5A-3, ELF5A-3 | ELF5A-3 (EUKARYOTIC ELONGATION FACTOR 5A-3); translation initiation factor	-	GO:0003723//RNA binding;GO:0003674//molecular_function;GO:0008135//translation factor activity, RNA binding;GO:0097159//organic cyclic compound binding;GO:1901363//heterocyclic compound binding;GO:0005488//binding;GO:0003676//nucleic acid binding	GO:0009059//macromolecule biosynthetic process;GO:1901566//organonitrogen compound biosynthetic process;GO:0043604//amide biosynthetic process;GO:0008152//metabolic process;GO:0006412//translation;GO:0006464//cellular protein modification process;GO:0044237//cellular metabolic process;GO:0044238//primary metabolic process;GO:0044249//cellular biosynthetic process;GO:0044271//cellular nitrogen com…
Bra004435	280.333	120.333	60.9467	26.8767	-1.18119	0.000119252	0.00229235	yes	AT2G47710 (E=1e-079) | universal stress protein (USP) family protein	-	-	GO:0006950//response to stress;GO:0050896//response to stimulus;GO:0008150//biological_process
Bra004451	23	4	0.88	0.163333	-2.42968	0.000307996	0.00509455	yes	AT2G47500 (E=3e-239) | ATP binding / microtubule motor	GO:0043232//intracellular non-membrane-bounded organelle;GO:0044424//intracellular part;GO:0005856//cytoskeleton;GO:0005623//cell;GO:0043229//intracellular organelle;GO:0005575//cellular_component;GO:0043228//non-membrane-bounded organelle;GO:0044464//cell part;GO:0043226//organelle;GO:0005622//intracellular	GO:0003774//motor activity;GO:0000166//nucleotide binding;GO:0003824//catalytic activity;GO:0005488//binding;GO:0005515//protein binding;GO:0016787//hydrolase activity;GO:0016817//hydrolase activity, acting on acid anhydrides;GO:0003674//molecular_function;GO:1901363//heterocyclic compound binding;GO:0036094//small molecule binding;GO:0016818//hydrolase activity, acting on acid anhydrides, in pho…	GO:0009987//cellular process;GO:0008150//biological_process
Bra004466	78.6667	24	9.18333	2.79	-1.71875	0.000190902	0.00340814	yes	AT2G47260 (E=8e-101) WRKY23, ATWRKY23 | WRKY23; transcription factor	-	GO:1901363//heterocyclic compound binding;GO:0097159//organic cyclic compound binding;GO:0003677//DNA binding;GO:0001071//nucleic acid binding transcription factor activity;GO:0003674//molecular_function;GO:0003676//nucleic acid binding;GO:0003700//transcription factor activity, sequence-specific DNA binding;GO:0005488//binding	GO:0009058//biosynthetic process;GO:0071704//organic substance metabolic process;GO:0034641//cellular nitrogen compound metabolic process;GO:0008152//metabolic process;GO:0006807//nitrogen compound metabolic process;GO:0046483//heterocycle metabolic process;GO:1901360//organic cyclic compound metabolic process;GO:0006139//nucleobase-containing compound metabolic process;GO:0006725//cellular aroma…
Bra004497	37.3333	11	5.22333	1.39333	-1.90643	0.00512304	0.0494806	yes	AT2G46910 (E=6e-093) | plastid-lipid associated protein PAP / fibrillin family protein	GO:0009536//plastid;GO:0043229//intracellular organelle;GO:0044464//cell part;GO:0043226//organelle;GO:0005623//cell;GO:0005575//cellular_component;GO:0005622//intracellular;GO:0044424//intracellular part;GO:0043227//membrane-bounded organelle;GO:0043231//intracellular membrane-bounded organelle;GO:0005737//cytoplasm;GO:0044444//cytoplasmic part	GO:0003674//molecular_function;GO:0005198//structural molecule activity	-
Bra004507	218	31.3333	18.99	2.74	-2.79299	2.0193e-18	3.21679e-16	yes	AT2G46790 (E=1e-085) APRR9, PRR9, TL1 | APRR9 (ARABIDOPSIS PSEUDO-RESPONSE REGULATOR 9); protein binding / transcription regulator/ two-component response regulator	-	GO:0004871//signal transducer activity;GO:0003677//DNA binding;GO:0097159//organic cyclic compound binding;GO:0005488//binding;GO:0003674//molecular_function;GO:0003676//nucleic acid binding;GO:0005515//protein binding;GO:1901363//heterocyclic compound binding	GO:1901360//organic cyclic compound metabolic process;GO:0006807//nitrogen compound metabolic process;GO:0044763//single-organism cellular process;GO:0007154//cell communication;GO:0051716//cellular response to stimulus;GO:0071704//organic substance metabolic process;GO:0044699//single-organism process;GO:0006139//nucleobase-containing compound metabolic process;GO:0007165//signal transduction;GO…
Bra004517	23.3333	99.6667	1.61	6.80667	2.07989	3.18199e-07	1.19379e-05	yes	AT2G46660 (E=1e-273) CYP78A6 | CYP78A6; electron carrier/ heme binding / iron ion binding / monooxygenase/ oxygen binding	-	GO:0003674//molecular_function;GO:0005488//binding;GO:0003824//catalytic activity	GO:0008150//biological_process;GO:0008152//metabolic process
Bra004541	26.6667	0	1.46	0.001	-10.5118	5.14815e-10	3.29058e-08	yes	-	-	-	-
Bra004558	15.3333	0	1.56667	0.001	-10.6135	3.68685e-09	2.06357e-07	yes	-	-	-	-
Bra004564	19.6667	2	3.19667	0.35	-3.19114	1.01877e-06	3.44738e-05	yes	AT2G46150 (E=3e-077) | FUNCTIONS IN: molecular_function unknown; INVOLVED IN: biological_process unknown; LOCATED IN: plasma membrane; EXPRESSED IN: 15 plant structures; EXPRESSED DURING: 7 growth stages; CONTAINS InterPro DOMAIN/s: Harpin-induced 1 (InterPro:IPR010847); BEST Arabidopsis thaliana protein match is: unknown protein (TAIR:AT3G54200.1); Has 137 Blast hits to 136 proteins in 12 specie…	GO:0005575//cellular_component;GO:0005886//plasma membrane;GO:0005623//cell;GO:0016020//membrane;GO:0071944//cell periphery;GO:0044464//cell part	-	-
Bra004571	63.3333	26.3333	3.72	1.53333	-1.27863	0.000179393	0.00322866	yes	AT2G40460 (E=1e-187) | proton-dependent oligopeptide transport (POT) family protein	GO:0005575//cellular_component;GO:0016020//membrane	GO:0003674//molecular_function;GO:0005215//transporter activity	GO:0006810//transport;GO:0051179//localization;GO:0008150//biological_process;GO:0051234//establishment of localization
Bra004574	4	0	0.543333	0.001	-9.08569	0.00310403	0.0336251	yes	AT2G40490 (E=5e-132) HEME2 | HEME2; uroporphyrinogen decarboxylase	-	GO:0003824//catalytic activity;GO:0003674//molecular_function	GO:0008150//biological_process;GO:0009058//biosynthetic process;GO:0009987//cellular process;GO:0008152//metabolic process
Bra004611	191.667	89.3333	36.39	17.94	-1.02036	0.00334701	0.0357045	yes	-	-	-	-
Bra004614	114	265.667	11.4433	26.4433	1.2084	0.00109857	0.0145279	yes	AT2G41300 (E=6e-172) | strictosidine synthase	-	GO:0003674//molecular_function;GO:0003824//catalytic activity	GO:0009058//biosynthetic process;GO:0008152//metabolic process;GO:0008150//biological_process
Bra004622	36.3333	0	2.43333	0.001	-11.2487	7.3621e-18	1.13216e-15	yes	AT2G41450 (E=2e-093) | N-acetyltransferase	-	GO:0016740//transferase activity;GO:0003824//catalytic activity;GO:0003674//molecular_function	-
Bra004626	26.3333	115.333	0.653333	2.77333	2.08573	1.87396e-11	1.46263e-09	yes	AT2G41520 (E=1e-277) | DNAJ heat shock N-terminal domain-containing protein	GO:0043226//organelle;GO:0005575//cellular_component;GO:0005737//cytoplasm;GO:0043231//intracellular membrane-bounded organelle;GO:0009536//plastid;GO:0044464//cell part;GO:0043227//membrane-bounded organelle;GO:0005622//intracellular;GO:0043229//intracellular organelle;GO:0044424//intracellular part;GO:0005623//cell;GO:0044444//cytoplasmic part	GO:0005515//protein binding;GO:0003824//catalytic activity;GO:0003674//molecular_function;GO:1901265//nucleoside phosphate binding;GO:0036094//small molecule binding;GO:1901363//heterocyclic compound binding;GO:0097159//organic cyclic compound binding;GO:0000166//nucleotide binding;GO:0005488//binding	GO:0009987//cellular process;GO:0008152//metabolic process;GO:0008150//biological_process
Bra004642	60.6667	170.333	2.69	7.54667	1.48823	1.60577e-09	9.51939e-08	yes	AT2G41720 (E=0.0) EMB2654 | EMB2654 (EMBRYO DEFECTIVE 2654)	-	GO:0003674//molecular_function;GO:0005488//binding;GO:0005515//protein binding	-
Bra004666	83	189	7.86	18.08	1.20179	8.55728e-07	2.9596e-05	yes	AT2G42030 (E=2e-094) | zinc finger (C3HC4-type RING finger) family protein	-	GO:0005515//protein binding;GO:0003674//molecular_function;GO:0005488//binding	-
Bra004668	36.3333	6.66667	4.92333	0.956667	-2.36355	8.39379e-07	2.92315e-05	yes	AT2G42070 (E=3e-118) ATNUDT23, ATNUDX23 | ATNUDX23 (ARABIDOPSIS THALIANA NUDIX HYDROLASE HOMOLOG 23); FAD diphosphatase/ hydrolase	-	GO:0003824//catalytic activity;GO:0003674//molecular_function;GO:0016787//hydrolase activity	-
Bra004669	21.3333	7.33333	2.93	1.02	-1.52233	0.00281976	0.0311386	yes	-	-	-	-
Bra004676	8.66667	105.333	0.523333	6.25	3.57805	8.71644e-21	1.79316e-18	yes	AT2G42230 (E=3e-207) | tubulin-specific chaperone C-related	-	-	GO:0016043//cellular component organization;GO:0009987//cellular process;GO:0032502//developmental process;GO:0048856//anatomical structure development;GO:0008150//biological_process;GO:0071840//cellular component organization or biogenesis;GO:0009653//anatomical structure morphogenesis
Bra004692	0	3.66667	0.001	0.613333	9.26053	0.00281122	0.0310775	yes	AT2G42410 (E=1e-088) ZFP11, ATZFP11 | ZFP11 (ZINC FINGER PROTEIN 11); nucleic acid binding / transcription factor/ zinc ion binding	-	GO:1901363//heterocyclic compound binding;GO:0097159//organic cyclic compound binding;GO:0003674//molecular_function;GO:0005488//binding;GO:0003676//nucleic acid binding	-
Bra004708	42.6667	10.3333	4.25333	1.10667	-1.94237	0.00128354	0.016415	yes	-	-	-	-
Bra004716	60.6667	244	9.28333	36.4567	1.97347	1.17852e-08	5.93347e-07	yes	AT2G42830 (E=4e-115) SHP2, AGL5 | SHP2 (SHATTERPROOF 2); protein binding / transcription factor	GO:0043231//intracellular membrane-bounded organelle;GO:0043229//intracellular organelle;GO:0044424//intracellular part;GO:0043227//membrane-bounded organelle;GO:0005622//intracellular;GO:0005634//nucleus;GO:0005623//cell;GO:0005575//cellular_component;GO:0044464//cell part;GO:0043226//organelle	GO:0003677//DNA binding;GO:0003676//nucleic acid binding;GO:0005515//protein binding;GO:1901363//heterocyclic compound binding;GO:0003674//molecular_function;GO:0003700//transcription factor activity, sequence-specific DNA binding;GO:0005488//binding;GO:0097159//organic cyclic compound binding;GO:0001071//nucleic acid binding transcription factor activity	GO:1901360//organic cyclic compound metabolic process;GO:0006807//nitrogen compound metabolic process;GO:0009058//biosynthetic process;GO:0008150//biological_process;GO:0046483//heterocycle metabolic process;GO:0034641//cellular nitrogen compound metabolic process;GO:0044237//cellular metabolic process;GO:0071704//organic substance metabolic process;GO:0044238//primary metabolic process;GO:000815…
Bra004717	2	11	0.496667	2.5	2.33158	0.00225298	0.0260851	yes	AT2G42820 (E=2e-083) HVA22F | HVA22F (HVA22-LIKE PROTEIN F)	GO:0016020//membrane;GO:0005575//cellular_component	-	-
Bra004726	53.3333	12	8.14	1.83	-2.15319	3.88806e-08	1.74033e-06	yes	AT2G42670 (E=5e-122) | unknown protein	-	GO:0003674//molecular_function;GO:0003824//catalytic activity	GO:0008150//biological_process;GO:0008152//metabolic process
Bra004729	8.66667	0.666667	1.25	0.09	-3.79586	0.000109982	0.00213581	yes	AT2G42900 (E=2e-100) | FUNCTIONS IN: molecular_function unknown; INVOLVED IN: biological_process unknown; LOCATED IN: cellular_component unknown; EXPRESSED IN: 22 plant structures; EXPRESSED DURING: 13 growth stages; CONTAINS InterPro DOMAIN/s: Plant Basic Secretory Protein (InterPro:IPR007541); Has 25 Blast hits to 25 proteins in 11 species: Archae - 0; Bacteria - 0; Metazoa - 1; Fungi - 0; Plan…	-	-	GO:0008150//biological_process
Bra004736	26.6667	8.66667	3.37333	1.11333	-1.59929	0.00171902	0.0207055	yes	AT2G43000 (E=2e-134) anac042 | anac042 (Arabidopsis NAC domain containing protein 42); transcription factor	GO:0005634//nucleus;GO:0043227//membrane-bounded organelle;GO:0043226//organelle;GO:0043231//intracellular membrane-bounded organelle;GO:0005575//cellular_component;GO:0005622//intracellular;GO:0044424//intracellular part;GO:0005623//cell;GO:0043229//intracellular organelle;GO:0044464//cell part	GO:0003676//nucleic acid binding;GO:0003677//DNA binding;GO:0003674//molecular_function;GO:0097159//organic cyclic compound binding;GO:1901363//heterocyclic compound binding;GO:0005488//binding	GO:0006139//nucleobase-containing compound metabolic process;GO:0006725//cellular aromatic compound metabolic process;GO:0071704//organic substance metabolic process;GO:0009987//cellular process;GO:0046483//heterocycle metabolic process;GO:0009058//biosynthetic process;GO:0034641//cellular nitrogen compound metabolic process;GO:0044237//cellular metabolic process;GO:1901360//organic cyclic compou…
Bra004746	29.6667	3	3.68	0.33	-3.47917	9.40969e-08	3.92353e-06	yes	-	-	-	-
Bra004748	30.6667	2.33333	3.55	0.266667	-3.73471	2.38548e-09	1.37993e-07	yes	AT2G43140 (E=8e-087) | DNA binding / transcription factor	-	GO:0005515//protein binding;GO:0003674//molecular_function;GO:0005488//binding	-
Bra004755	11	1	0.943333	0.0833333	-3.5008	4.4538e-05	0.000981922	yes	AT2G43260 (E=5e-162) | F-box family protein / S locus-related	-	GO:0003674//molecular_function;GO:0005488//binding;GO:0005515//protein binding	-
Bra004762	227	104.667	14.7867	6.48333	-1.18949	0.00015962	0.00292534	yes	AT2G43420 (E=1e-244) | 3-beta hydroxysteroid dehydrogenase/isomerase family protein	GO:0044464//cell part;GO:0071944//cell periphery;GO:0005623//cell;GO:0005575//cellular_component;GO:0005886//plasma membrane;GO:0016020//membrane	GO:0003674//molecular_function;GO:0003824//catalytic activity	GO:0044699//single-organism process;GO:0044238//primary metabolic process;GO:0009058//biosynthetic process;GO:0071704//organic substance metabolic process;GO:0008150//biological_process;GO:0044710//single-organism metabolic process;GO:0008152//metabolic process;GO:0006629//lipid metabolic process
Bra004768	86.6667	10.3333	34.8633	4.53667	-2.94201	7.97494e-09	4.19887e-07	yes	AT2G43510 (E=2e-034) ATTI1 | ATTI1; serine-type endopeptidase inhibitor	GO:0005575//cellular_component;GO:0005576//extracellular region	GO:0030234//enzyme regulator activity;GO:0098772//molecular function regulator;GO:0003674//molecular_function	GO:0009607//response to biotic stimulus;GO:0008150//biological_process;GO:0050896//response to stimulus;GO:0009605//response to external stimulus;GO:0006950//response to stress
Bra004771	24.6667	0.333333	3.1	0.0433333	-6.16065	1.53211e-11	1.2049e-09	yes	AT2G43570 (E=2e-110) | chitinase, putative	GO:0071944//cell periphery;GO:0030312//external encapsulating structure;GO:0005576//extracellular region;GO:0044464//cell part;GO:0005618//cell wall;GO:0005623//cell;GO:0005575//cellular_component	GO:0003674//molecular_function;GO:0003824//catalytic activity;GO:0005488//binding;GO:0016787//hydrolase activity	GO:0008150//biological_process;GO:0009987//cellular process;GO:0071704//organic substance metabolic process;GO:0009056//catabolic process;GO:0005975//carbohydrate metabolic process;GO:0044238//primary metabolic process;GO:0008152//metabolic process
Bra004772	257.333	61.6667	32.55	7.79	-2.06296	9.47767e-14	9.98015e-12	yes	AT2G43620 (E=8e-120) | chitinase, putative	-	GO:0003824//catalytic activity;GO:0016787//hydrolase activity;GO:0005488//binding;GO:0003674//molecular_function	GO:0071704//organic substance metabolic process;GO:0044238//primary metabolic process;GO:0009987//cellular process;GO:0008152//metabolic process;GO:0005975//carbohydrate metabolic process;GO:0009056//catabolic process;GO:0008150//biological_process
Bra004784	33	110	3.01	10.3	1.77481	3.62407e-08	1.62921e-06	yes	AT2G43790 (E=1e-220) ATMPK6, MPK6, MAPK6 | ATMPK6 (ARABIDOPSIS THALIANA MAP KINASE 6); MAP kinase/ kinase	-	GO:0016740//transferase activity;GO:0036094//small molecule binding;GO:0016772//transferase activity, transferring phosphorus-containing groups;GO:0005488//binding;GO:0003674//molecular_function;GO:0003824//catalytic activity;GO:0097159//organic cyclic compound binding;GO:1901265//nucleoside phosphate binding;GO:1901363//heterocyclic compound binding;GO:0016301//kinase activity;GO:0000166//nucleo…	GO:0044699//single-organism process;GO:0044763//single-organism cellular process;GO:0044267//cellular protein metabolic process;GO:0065007//biological regulation;GO:0008150//biological_process;GO:0043170//macromolecule metabolic process;GO:0023052//signaling;GO:0009987//cellular process;GO:0007154//cell communication;GO:0051716//cellular response to stimulus;GO:0043412//macromolecule modification…
Bra004797	15.6667	3.66667	1.14333	0.246667	-2.21261	0.000462886	0.00716804	yes	AT2G43990 (E=8e-067) | unknown protein	-	-	GO:0022414//reproductive process;GO:0044260//cellular macromolecule metabolic process;GO:0071704//organic substance metabolic process;GO:0048608//reproductive structure development;GO:0032502//developmental process;GO:0044238//primary metabolic process;GO:0006464//cellular protein modification process;GO:0044702//single organism reproductive process;GO:0043412//macromolecule modification;GO:00905…
Bra004798	52	0	9.46	0.001	-13.2076	1.88815e-17	2.81988e-15	yes	-	-	-	-
Bra004807	26	1.33333	2.23333	0.126667	-4.14009	2.89423e-07	1.09776e-05	yes	AT2G44130 (E=1e-095) | kelch repeat-containing F-box family protein	-	GO:0005488//binding;GO:0003674//molecular_function;GO:0005515//protein binding	-
Bra004812	329.667	154.333	28.1967	13.09	-1.10706	1.59604e-07	6.44726e-06	yes	-	-	-	-
Bra004817	35.3333	9	2.42667	0.59	-2.04019	0.00101213	0.0135667	yes	-	-	-	-
Bra004823	219.667	105.333	17.48	7.99	-1.12944	0.000212537	0.00371958	yes	-	-	-	-
Bra004833	16	0	1.07333	0.001	-10.0679	1.58482e-08	7.71644e-07	yes	AT3G60120 (E=8e-285) BGLU27 | BGLU27 (BETA GLUCOSIDASE 27); catalytic/ cation binding / hydrolase, hydrolyzing O-glycosyl compounds	-	GO:0016787//hydrolase activity;GO:0003824//catalytic activity;GO:0003674//molecular_function	GO:0044238//primary metabolic process;GO:0005975//carbohydrate metabolic process;GO:0008150//biological_process;GO:0071704//organic substance metabolic process;GO:0008152//metabolic process
Bra004837	758.667	1737.33	24.1833	53.5867	1.14786	9.32161e-05	0.0018562	yes	AT2G44460 (E=6e-267) BGLU28 | BGLU28 (BETA GLUCOSIDASE 28); catalytic/ cation binding / hydrolase, hydrolyzing O-glycosyl compounds	GO:0016020//membrane;GO:0005575//cellular_component	GO:0003824//catalytic activity;GO:0016787//hydrolase activity;GO:0003674//molecular_function	GO:0005975//carbohydrate metabolic process;GO:0008152//metabolic process;GO:0071704//organic substance metabolic process;GO:0008150//biological_process;GO:0044238//primary metabolic process
Bra004843	20.3333	63.6667	4.30333	13.5033	1.64979	4.11504e-06	0.000119355	yes	-	-	-	-
Bra004854	11	51.3333	0.796667	3.73	2.22713	2.26076e-08	1.04975e-06	yes	AT2G44660 (E=1e-233) | transferase, transferring glycosyl groups / transferase, transferring hexosyl groups	GO:0043231//intracellular membrane-bounded organelle;GO:0044464//cell part;GO:0016020//membrane;GO:0005575//cellular_component;GO:0005622//intracellular;GO:0044444//cytoplasmic part;GO:0005737//cytoplasm;GO:0044424//intracellular part;GO:0012505//endomembrane system;GO:0043227//membrane-bounded organelle;GO:0043226//organelle;GO:0005783//endoplasmic reticulum;GO:0005623//cell;GO:0043229//intracel…	GO:0016740//transferase activity;GO:0003674//molecular_function;GO:0003824//catalytic activity	GO:0006950//response to stress;GO:0009628//response to abiotic stimulus;GO:0009987//cellular process;GO:0008150//biological_process;GO:0071840//cellular component organization or biogenesis;GO:0016043//cellular component organization;GO:0050896//response to stimulus
Bra004859	80.6667	242	9.76	29.0467	1.57342	2.15153e-10	1.44352e-08	yes	AT2G44730 (E=1e-046) | transcription factor	-	GO:0003674//molecular_function;GO:0044877//macromolecular complex binding;GO:0003682//chromatin binding;GO:0005488//binding	-
Bra004872	144.667	37.6667	7.62	1.98667	-1.93944	1.67377e-07	6.72625e-06	yes	AT2G44830 (E=5e-262) | protein kinase, putative	-	GO:1901363//heterocyclic compound binding;GO:0036094//small molecule binding;GO:0097159//organic cyclic compound binding;GO:0016740//transferase activity;GO:1901265//nucleoside phosphate binding;GO:0003824//catalytic activity;GO:0005488//binding;GO:0016301//kinase activity;GO:0016772//transferase activity, transferring phosphorus-containing groups;GO:0000166//nucleotide binding;GO:0003674//molecu…	GO:0071704//organic substance metabolic process;GO:0044267//cellular protein metabolic process;GO:0044237//cellular metabolic process;GO:0006464//cellular protein modification process;GO:0044260//cellular macromolecule metabolic process;GO:0036211//protein modification process;GO:0019538//protein metabolic process;GO:0044238//primary metabolic process;GO:0009987//cellular process;GO:0008152//meta…
Bra004878	6.66667	0.666667	0.86	0.0966667	-3.15325	0.00132041	0.0168172	yes	AT2G44940 (E=2e-084) | AP2 domain-containing transcription factor TINY, putative	GO:0044424//intracellular part;GO:0005634//nucleus;GO:0043231//intracellular membrane-bounded organelle;GO:0005622//intracellular;GO:0043226//organelle;GO:0005623//cell;GO:0043229//intracellular organelle;GO:0043227//membrane-bounded organelle;GO:0005575//cellular_component;GO:0044464//cell part	GO:0003677//DNA binding;GO:0001071//nucleic acid binding transcription factor activity;GO:0097159//organic cyclic compound binding;GO:0003676//nucleic acid binding;GO:0005488//binding;GO:0003700//transcription factor activity, sequence-specific DNA binding;GO:0003674//molecular_function;GO:1901363//heterocyclic compound binding	GO:0046483//heterocycle metabolic process;GO:0006807//nitrogen compound metabolic process;GO:1901360//organic cyclic compound metabolic process;GO:0044237//cellular metabolic process;GO:0008150//biological_process;GO:0006139//nucleobase-containing compound metabolic process;GO:0034641//cellular nitrogen compound metabolic process;GO:0006725//cellular aromatic compound metabolic process;GO:0071704…
Bra004881	449.333	178.333	25.1233	9.73667	-1.36753	1.49508e-08	7.34859e-07	yes	AT2G44980 (E=5e-215) | transcription regulatory protein SNF2, putative	-	GO:0036094//small molecule binding;GO:0003677//DNA binding;GO:0000166//nucleotide binding;GO:0097159//organic cyclic compound binding;GO:0003676//nucleic acid binding;GO:0016787//hydrolase activity;GO:1901265//nucleoside phosphate binding;GO:1901363//heterocyclic compound binding;GO:0005488//binding;GO:0003824//catalytic activity;GO:0003674//molecular_function	-
Bra004894	88.3333	188.333	7.85667	16.8467	1.10047	3.47645e-06	0.000102948	yes	-	-	-	-
Bra004896	24.3333	7.66667	3.4	1.05333	-1.69057	0.000305855	0.00506724	yes	AT2G45330 (E=4e-108) emb1067 | emb1067 (embryo defective 1067); tRNA 2'-phosphotransferase/ transferase, transferring phosphorus-containing groups	-	GO:0003824//catalytic activity;GO:0003674//molecular_function;GO:0016740//transferase activity	GO:0006139//nucleobase-containing compound metabolic process;GO:0008150//biological_process;GO:0044238//primary metabolic process;GO:0006807//nitrogen compound metabolic process;GO:0044237//cellular metabolic process;GO:0006725//cellular aromatic compound metabolic process;GO:0071704//organic substance metabolic process;GO:1901360//organic cyclic compound metabolic process;GO:0034641//cellular ni…
Bra004910	114.333	50.6667	16.2567	7.38	-1.13934	0.000166932	0.00304676	yes	-	-	-	-
Bra004933	84	21	4.82	1.19	-2.01807	7.71814e-09	4.07749e-07	yes	AT2G45750 (E=0.0) | dehydration-responsive family protein	-	GO:0003674//molecular_function;GO:0003824//catalytic activity;GO:0016740//transferase activity	GO:0008152//metabolic process;GO:0008150//biological_process
Bra004934	187.667	91.6667	8.62667	4.26	-1.01795	1.5238e-05	0.000387677	yes	AT3G61150 (E=2e-283) HDG1, HD-GL2-1 | HDG1 (HOMEODOMAIN GLABROUS 1); DNA binding / transcription factor	GO:0043226//organelle;GO:0043227//membrane-bounded organelle;GO:0043231//intracellular membrane-bounded organelle;GO:0005623//cell;GO:0005622//intracellular;GO:0005575//cellular_component;GO:0043229//intracellular organelle;GO:0005634//nucleus;GO:0044424//intracellular part;GO:0044464//cell part	GO:0001071//nucleic acid binding transcription factor activity;GO:1901363//heterocyclic compound binding;GO:0097159//organic cyclic compound binding;GO:0003674//molecular_function;GO:0008289//lipid binding;GO:0003677//DNA binding;GO:0003676//nucleic acid binding;GO:0003700//transcription factor activity, sequence-specific DNA binding;GO:0005488//binding	GO:0008152//metabolic process;GO:0044237//cellular metabolic process;GO:1901360//organic cyclic compound metabolic process;GO:0034641//cellular nitrogen compound metabolic process;GO:0008150//biological_process;GO:0009987//cellular process;GO:0006807//nitrogen compound metabolic process;GO:0046483//heterocycle metabolic process;GO:0006139//nucleobase-containing compound metabolic process;GO:00090…
Bra004937	179	50.3333	17.51	4.85667	-1.85014	6.89752e-13	6.49286e-11	yes	AT2G45770 (E=3e-190) CPFTSY, FRD4 | CPFTSY; 7S RNA binding / GTP binding / nucleoside-triphosphatase/ nucleotide binding	-	GO:0005488//binding;GO:0003674//molecular_function;GO:1901363//heterocyclic compound binding;GO:0003824//catalytic activity;GO:0000166//nucleotide binding;GO:1901265//nucleoside phosphate binding;GO:0036094//small molecule binding;GO:0097159//organic cyclic compound binding;GO:0016787//hydrolase activity	GO:0051179//localization;GO:0051234//establishment of localization;GO:0009987//cellular process;GO:0008150//biological_process;GO:0071840//cellular component organization or biogenesis;GO:0016043//cellular component organization;GO:0006810//transport
Bra004954	52.3333	15.3333	7.08667	2.02667	-1.806	1.31448e-06	4.29369e-05	yes	AT2G45990 (E=2e-136) | unknown protein	GO:0043229//intracellular organelle;GO:0009536//plastid;GO:0043227//membrane-bounded organelle;GO:0043231//intracellular membrane-bounded organelle;GO:0043226//organelle;GO:0044424//intracellular part;GO:0005575//cellular_component;GO:0005623//cell;GO:0044444//cytoplasmic part;GO:0005737//cytoplasm;GO:0044464//cell part;GO:0005622//intracellular	-	GO:0008152//metabolic process;GO:0015979//photosynthesis;GO:0009058//biosynthetic process;GO:0071840//cellular component organization or biogenesis;GO:0008150//biological_process;GO:0016043//cellular component organization;GO:0044237//cellular metabolic process;GO:0006091//generation of precursor metabolites and energy;GO:0009987//cellular process
Bra004955	5	0.333333	0.86	0.05	-4.10434	0.00475523	0.0467606	yes	-	-	-	-
Bra005012	48.6667	17.3333	2.51667	0.886667	-1.50505	0.000553941	0.00829682	yes	AT2G39800 (E=0.0) P5CS1, ATP5CS | P5CS1 (DELTA1-PYRROLINE-5-CARBOXYLATE SYNTHASE 1); delta1-pyrroline-5-carboxylate synthetase	GO:0005737//cytoplasm;GO:0005622//intracellular;GO:0044464//cell part;GO:0005575//cellular_component;GO:0005623//cell;GO:0044424//intracellular part	GO:0016740//transferase activity;GO:1901363//heterocyclic compound binding;GO:0005488//binding;GO:0097159//organic cyclic compound binding;GO:0016772//transferase activity, transferring phosphorus-containing groups;GO:0003674//molecular_function;GO:0000166//nucleotide binding;GO:0036094//small molecule binding;GO:0003824//catalytic activity;GO:1901265//nucleoside phosphate binding;GO:0016301//kin…	GO:0009058//biosynthetic process;GO:0009987//cellular process;GO:0008152//metabolic process;GO:0008150//biological_process
Bra005013	105.333	37.6667	15.23	5.45333	-1.48171	2.36244e-07	9.17334e-06	yes	AT2G39795 (E=2e-093) | mitochondrial glycoprotein family protein / MAM33 family protein	GO:0043226//organelle;GO:0005739//mitochondrion;GO:0043227//membrane-bounded organelle;GO:0005575//cellular_component;GO:0044444//cytoplasmic part;GO:0005622//intracellular;GO:0043229//intracellular organelle;GO:0044464//cell part;GO:0043231//intracellular membrane-bounded organelle;GO:0044424//intracellular part;GO:0005623//cell;GO:0005737//cytoplasm	-	-
Bra005020	71.3333	27.6667	7.56667	2.87	-1.39861	1.51198e-05	0.000385697	yes	AT2G39720 (E=7e-079) RHC2A | RHC2A; protein binding / zinc ion binding	-	GO:0005515//protein binding;GO:0003674//molecular_function;GO:0005488//binding	-
Bra005031	17	52.6667	1.9	5.87667	1.629	1.66505e-05	0.00041983	yes	AT2G39550 (E=2e-172) ATGGT-IB, GGB, PGGT-I | PGGT-I; CAAX-protein geranylgeranyltransferase/ protein heterodimerization	-	GO:0016740//transferase activity;GO:0003674//molecular_function;GO:0003824//catalytic activity	GO:0065007//biological regulation;GO:0044260//cellular macromolecule metabolic process;GO:0007154//cell communication;GO:0051716//cellular response to stimulus;GO:0009628//response to abiotic stimulus;GO:0006464//cellular protein modification process;GO:0044700//single organism signaling;GO:0009719//response to endogenous stimulus;GO:0071704//organic substance metabolic process;GO:0050896//respon…
Bra005047	0	6	0.001	0.736667	9.52487	0.000526435	0.00798105	yes	-	-	-	-
Bra005050	121.663	346.833	4.43333	12.6267	1.51001	1.14318e-12	1.03836e-10	yes	-	-	-	-
Bra005052	121.663	346.833	4.43333	12.6267	1.51001	1.14166e-12	1.03836e-10	yes	-	-	-	-
Bra005059	162	67	10.3833	4.25333	-1.2876	2.35909e-06	7.29182e-05	yes	AT2G39210 (E=7e-272) | nodulin family protein	GO:0005575//cellular_component;GO:0016020//membrane	-	GO:0051179//localization;GO:0008150//biological_process;GO:0006810//transport;GO:0051234//establishment of localization;GO:0009987//cellular process
Bra005061	48.6667	18.3333	3.78333	1.45	-1.3836	0.000281694	0.00474285	yes	AT2G39130 (E=1e-212) | amino acid transporter family protein	GO:0016020//membrane;GO:0005575//cellular_component	-	-
Bra005070	23.83	7.91667	1.61	0.523333	-1.62126	0.00115186	0.0150405	yes	AT2G38940 (E=8e-262) ATPT2, PHT1;4 | ATPT2 (ARABIDOPSIS THALIANA PHOSPHATE TRANSPORTER 2); carbohydrate transmembrane transporter/ inorganic phosphate transmembrane transporter/ phosphate transmembrane transporter/ sugar:hydrogen symporter	GO:0016020//membrane;GO:0005575//cellular_component	GO:0003674//molecular_function;GO:0005215//transporter activity	GO:0051179//localization;GO:0009987//cellular process;GO:0051234//establishment of localization;GO:0008150//biological_process;GO:0006810//transport
Bra005099	177	9	54.83	2.90667	-4.23753	1.85279e-14	2.1238e-12	yes	AT2G38540 (E=1e-044) LP1, LTP1, ATLTP1 | LP1; calmodulin binding	-	GO:0008289//lipid binding;GO:0003674//molecular_function;GO:0005488//binding	GO:0006810//transport;GO:0051234//establishment of localization;GO:0008150//biological_process;GO:0051179//localization
Bra005104	48.6667	2.33333	3.89667	0.18	-4.43617	1.16687e-14	1.36269e-12	yes	AT2G38470 (E=3e-093) WRKY33, ATWRKY33 | WRKY33; transcription factor	-	GO:0003674//molecular_function;GO:1901363//heterocyclic compound binding;GO:0003676//nucleic acid binding;GO:0003677//DNA binding;GO:0005488//binding;GO:0003700//transcription factor activity, sequence-specific DNA binding;GO:0097159//organic cyclic compound binding;GO:0001071//nucleic acid binding transcription factor activity	GO:0008152//metabolic process;GO:0046483//heterocycle metabolic process;GO:0044238//primary metabolic process;GO:1901360//organic cyclic compound metabolic process;GO:0009058//biosynthetic process;GO:0008150//biological_process;GO:0071704//organic substance metabolic process;GO:0034641//cellular nitrogen compound metabolic process;GO:0009987//cellular process;GO:0006807//nitrogen compound metabol…
Bra005173	3.77	0	0.366667	0.001	-8.51833	0.00361429	0.037841	yes	-	-	-	-
Bra005174	48	17.3333	6.45333	2.29333	-1.4926	0.00193907	0.0229206	yes	AT5G02230 (E=3e-107) | haloacid dehalogenase-like hydrolase family protein	-	GO:0016787//hydrolase activity;GO:0003674//molecular_function;GO:0003824//catalytic activity	GO:0008152//metabolic process;GO:0008150//biological_process
Bra005177	24.6667	207.667	2.42	20.75	3.10003	1.64552e-24	4.36893e-22	yes	AT2G37630 (E=1e-161) ATPHAN, AS1, ATMYB91, MYB91 | AS1 (ASYMMETRIC LEAVES 1); DNA binding / protein homodimerization/ transcription factor	GO:0044464//cell part;GO:0043226//organelle;GO:0005622//intracellular;GO:0005634//nucleus;GO:0005575//cellular_component;GO:0043229//intracellular organelle;GO:0043227//membrane-bounded organelle;GO:0005623//cell;GO:0044424//intracellular part;GO:0043231//intracellular membrane-bounded organelle	GO:0003682//chromatin binding;GO:0003676//nucleic acid binding;GO:1901363//heterocyclic compound binding;GO:0003674//molecular_function;GO:0097159//organic cyclic compound binding;GO:0005488//binding;GO:0003677//DNA binding;GO:0044877//macromolecular complex binding	GO:0006139//nucleobase-containing compound metabolic process;GO:0009987//cellular process;GO:0032501//multicellular organismal process;GO:0009058//biosynthetic process;GO:0044699//single-organism process;GO:0034641//cellular nitrogen compound metabolic process;GO:0006807//nitrogen compound metabolic process;GO:0006725//cellular aromatic compound metabolic process;GO:0044237//cellular metabolic pr…
Bra005206	19.6667	74	0.68	2.42	1.8314	1.95604e-06	6.17505e-05	yes	-	-	-	-
Bra005207	0	4.71667	0.001	0.12	6.90689	0.00366953	0.0383161	yes	AT2G37280 (E=0.0) PDR5, ATPDR5 | PDR5 (PLEIOTROPIC DRUG RESISTANCE 5); ATPase, coupled to transmembrane movement of substances	GO:0005575//cellular_component;GO:0016020//membrane	GO:0003824//catalytic activity;GO:0097159//organic cyclic compound binding;GO:0016787//hydrolase activity;GO:0000166//nucleotide binding;GO:1901265//nucleoside phosphate binding;GO:0036094//small molecule binding;GO:0003674//molecular_function;GO:0005488//binding;GO:1901363//heterocyclic compound binding	-
Bra005208	72.6667	360.95	1.92	9.18667	2.25844	2.49618e-12	2.15992e-10	yes	AT2G37280 (E=0.0) PDR5, ATPDR5 | PDR5 (PLEIOTROPIC DRUG RESISTANCE 5); ATPase, coupled to transmembrane movement of substances	GO:0016020//membrane;GO:0005575//cellular_component	GO:0003674//molecular_function;GO:0000166//nucleotide binding;GO:1901265//nucleoside phosphate binding;GO:0036094//small molecule binding;GO:0016787//hydrolase activity;GO:0097159//organic cyclic compound binding;GO:0003824//catalytic activity;GO:0005488//binding;GO:1901363//heterocyclic compound binding	-
Bra005210	15.6667	4.33333	1.38667	0.39	-1.83007	0.00134183	0.0170412	yes	AT2G37260 (E=8e-101) TTG2, ATWRKY44, WRKY44, DSL1 | TTG2 (TRANSPARENT TESTA GLABRA 2); transcription factor	-	GO:0003674//molecular_function;GO:0097159//organic cyclic compound binding;GO:0001071//nucleic acid binding transcription factor activity;GO:0003676//nucleic acid binding;GO:0005488//binding;GO:0003700//transcription factor activity, sequence-specific DNA binding;GO:0003677//DNA binding;GO:1901363//heterocyclic compound binding	GO:0009987//cellular process;GO:0071704//organic substance metabolic process;GO:0044238//primary metabolic process;GO:0034641//cellular nitrogen compound metabolic process;GO:0006139//nucleobase-containing compound metabolic process;GO:0009058//biosynthetic process;GO:0006725//cellular aromatic compound metabolic process;GO:0008150//biological_process;GO:0044237//cellular metabolic process;GO:190…
Bra005227	10.6933	40	0.8	2.97	1.89239	1.84246e-06	5.87016e-05	yes	AT2G36970 (E=4e-255) | UDP-glucoronosyl/UDP-glucosyl transferase family protein	-	GO:0003674//molecular_function;GO:0016740//transferase activity;GO:0003824//catalytic activity	GO:0008150//biological_process;GO:0008152//metabolic process
Bra005231	10.3333	1.66667	0.973333	0.163333	-2.57511	0.000509451	0.00777288	yes	AT2G36950 (E=3e-106) | heavy-metal-associated domain-containing protein	-	GO:0005488//binding;GO:0003674//molecular_function	GO:0051179//localization;GO:0006810//transport;GO:0008150//biological_process;GO:0051234//establishment of localization
Bra005232	57	20.6667	17.1333	6.28	-1.44797	5.68822e-05	0.00121693	yes	AT2G36930 (E=3e-054) | zinc finger (C2H2 type) family protein	-	GO:0097159//organic cyclic compound binding;GO:0003674//molecular_function;GO:0005488//binding;GO:1901363//heterocyclic compound binding;GO:0003676//nucleic acid binding	-
Bra005235	0.666667	24	0.0966667	3.46667	5.16439	8.22759e-11	5.87545e-09	yes	AT2G36885 (E=7e-085) | unknown protein	GO:0005623//cell;GO:0044464//cell part;GO:0005575//cellular_component;GO:0016020//membrane;GO:0071944//cell periphery;GO:0005886//plasma membrane	-	-
Bra005242	0	11.3333	0.001	0.803333	9.64985	1.58786e-05	0.000401999	yes	AT2G36800 (E=5e-244) DOGT1, UGT73C5 | DOGT1 (DON-GLUCOSYLTRANSFERASE 1); UDP-glycosyltransferase/ cis-zeatin O-beta-D-glucosyltransferase/ glucosyltransferase/ quercetin 4'-O-glucosyltransferase/ quercetin 7-O-glucosyltransferase/ trans-zeatin O-beta-D-glucosyltransferase/ transferase, transf	-	GO:0003824//catalytic activity;GO:0016740//transferase activity;GO:0003674//molecular_function	GO:0008150//biological_process;GO:0008152//metabolic process
Bra005243	13	0	1.03333	0.001	-10.0131	4.3564e-07	1.59772e-05	yes	AT2G36770 (E=4e-209) | UDP-glucoronosyl/UDP-glucosyl transferase family protein	-	GO:0016740//transferase activity;GO:0003674//molecular_function;GO:0003824//catalytic activity	GO:0008150//biological_process;GO:0008152//metabolic process
Bra005245	56.6667	1.33333	4.13	0.106667	-5.27496	2.3023e-06	7.13759e-05	yes	AT2G36780 (E=3e-241) | UDP-glucoronosyl/UDP-glucosyl transferase family protein	-	GO:0016740//transferase activity;GO:0003824//catalytic activity;GO:0003674//molecular_function	GO:0008150//biological_process;GO:0008152//metabolic process
Bra005257	50.6667	19.6667	3.97667	1.54333	-1.36551	0.000107776	0.00210167	yes	AT2G36630 (E=2e-187) | unknown protein	GO:0005575//cellular_component;GO:0016020//membrane	-	-
Bra005267	22.3333	57	2.00333	5.10333	1.34904	0.000314764	0.00518168	yes	-	-	-	-
Bra005306	76.6667	192.667	6.25	15.6667	1.32577	2.27846e-06	7.07073e-05	yes	-	-	-	-
Bra005312	9	119	0.65	8.5	3.70895	8.66964e-14	9.16033e-12	yes	AT2G35710 (E=2e-261) | glycogenin glucosyltransferase (glycogenin)-related	-	GO:0003674//molecular_function;GO:0003824//catalytic activity;GO:0016740//transferase activity	-
Bra005333	0	13.3333	0.001	5.50333	12.4261	9.70718e-09	4.97597e-07	yes	-	-	-	-
Bra005336	9	31	0.6	2.15667	1.84577	0.000256769	0.00438257	yes	AT2G35510 (E=4e-111) SRO1 | SRO1 (SIMILAR TO RCD ONE 1); NAD+ ADP-ribosyltransferase	-	GO:0016740//transferase activity;GO:0003674//molecular_function;GO:0003824//catalytic activity	-
Bra005338	11.3333	2.66667	2.06333	0.506667	-2.02587	0.00414706	0.0419213	yes	-	-	-	-
Bra005341	2.66667	26	0.283333	2.73333	3.27009	6.62087e-09	3.53994e-07	yes	AT2G35450 (E=5e-173) | catalytic/ hydrolase	GO:0005623//cell;GO:0044424//intracellular part;GO:0005622//intracellular;GO:0043229//intracellular organelle;GO:0005575//cellular_component;GO:0005737//cytoplasm;GO:0044444//cytoplasmic part;GO:0043231//intracellular membrane-bounded organelle;GO:0043227//membrane-bounded organelle;GO:0043226//organelle;GO:0009536//plastid;GO:0044464//cell part	GO:0003824//catalytic activity;GO:0016787//hydrolase activity;GO:0003674//molecular_function	GO:0008152//metabolic process;GO:0008150//biological_process
Bra005348	21	50.6667	3.44667	8.2	1.25042	0.00163602	0.0199848	yes	AT2G35360 (E=8e-100) | ubiquitin family protein	-	GO:0003674//molecular_function;GO:0005515//protein binding;GO:0005488//binding	-
Bra005374	3	13.6667	0.28	1.32333	2.24068	0.000992537	0.0133878	yes	AT2G35000 (E=5e-108) | zinc finger (C3HC4-type RING finger) family protein	-	GO:0003674//molecular_function;GO:0005515//protein binding;GO:0005488//binding;GO:0003824//catalytic activity;GO:0016740//transferase activity	GO:0044763//single-organism cellular process;GO:0019538//protein metabolic process;GO:0032501//multicellular organismal process;GO:0044237//cellular metabolic process;GO:0006464//cellular protein modification process;GO:0043170//macromolecule metabolic process;GO:0009605//response to external stimulus;GO:0044267//cellular protein metabolic process;GO:0048856//anatomical structure development;GO:0…
Bra005376	16	43	1.88667	5	1.40609	0.000288896	0.00483341	yes	AT2G34980 (E=4e-112) SETH1 | SETH1; phosphatidylinositol N-acetylglucosaminyltransferase/ transferase	GO:0043226//organelle;GO:0016020//membrane;GO:0043227//membrane-bounded organelle;GO:0043229//intracellular organelle;GO:0044424//intracellular part;GO:0005622//intracellular;GO:0012505//endomembrane system;GO:0005737//cytoplasm;GO:0005623//cell;GO:0044444//cytoplasmic part;GO:0044464//cell part;GO:0005575//cellular_component;GO:0043231//intracellular membrane-bounded organelle;GO:0005783//endopl…	GO:0003674//molecular_function;GO:0016740//transferase activity;GO:0003824//catalytic activity	GO:0009856//pollination;GO:0071704//organic substance metabolic process;GO:0044260//cellular macromolecule metabolic process;GO:0022414//reproductive process;GO:0044703//multi-organism reproductive process;GO:0044767//single-organism developmental process;GO:0044238//primary metabolic process;GO:0000003//reproduction;GO:0040007//growth;GO:0008150//biological_process;GO:0016049//cell growth;GO:003…
Bra005378	45.6667	136.667	1.86	5.57	1.58237	2.10745e-06	6.61271e-05	yes	AT2G34930 (E=0.0) | disease resistance family protein	-	GO:0005488//binding;GO:0003674//molecular_function;GO:0005515//protein binding	-
Bra005387	89.6667	28.6667	7.20333	2.29	-1.65332	9.99607e-08	4.14577e-06	yes	AT1G30620 (E=4e-210) HSR8, MUR4, UXE1 | MUR4 (MURUS 4); UDP-arabinose 4-epimerase/ catalytic	-	GO:0003824//catalytic activity;GO:0005488//binding;GO:0003674//molecular_function	GO:0044238//primary metabolic process;GO:0008150//biological_process;GO:0009987//cellular process;GO:0005975//carbohydrate metabolic process;GO:0008152//metabolic process;GO:0071704//organic substance metabolic process
Bra005392	385.333	52.3333	26.2233	3.61667	-2.85812	1.60745e-31	7.92598e-29	yes	AT2G34790 (E=3e-273) MEE23, EDA28 | MEE23 (MATERNAL EFFECT EMBRYO ARREST 23); FAD binding / catalytic/ electron carrier/ oxidoreductase	GO:0044464//cell part;GO:0005575//cellular_component;GO:0071944//cell periphery;GO:0030312//external encapsulating structure;GO:0005623//cell;GO:0005618//cell wall	GO:1901265//nucleoside phosphate binding;GO:1901363//heterocyclic compound binding;GO:0003674//molecular_function;GO:0005488//binding;GO:0036094//small molecule binding;GO:0003824//catalytic activity;GO:0000166//nucleotide binding;GO:0097159//organic cyclic compound binding	GO:0044707//single-multicellular organism process;GO:0016043//cellular component organization;GO:0008152//metabolic process;GO:0032502//developmental process;GO:0044767//single-organism developmental process;GO:0008150//biological_process;GO:0048856//anatomical structure development;GO:0048869//cellular developmental process;GO:0007275//multicellular organism development;GO:0044763//single-organi…
Bra005396	15	42	0.863333	2.30333	1.41573	0.00170364	0.0206002	yes	-	-	-	-
Bra005399	907	2.33333	194.397	0.513333	-8.56489	3.1776e-66	5.80641e-63	yes	AT2G34700 (E=5e-079) | pollen Ole e 1 allergen and extensin family protein	-	GO:0003674//molecular_function;GO:0005198//structural molecule activity	-
Bra005409	5.66667	0.666667	1.19	0.14	-3.08746	0.00376383	0.0390905	yes	-	-	-	-
Bra005410	6.33333	0.666667	0.633333	0.0733333	-3.11042	0.00156519	0.0193031	yes	AT4G38940 (E=5e-073) | kelch repeat-containing F-box family protein	-	GO:0005488//binding;GO:0005515//protein binding;GO:0003674//molecular_function	-
Bra005417	0	12.3333	0.001	1.51667	10.5667	0.000105036	0.00205468	yes	-	-	-	-
Bra005423	23.3467	1.03	1.74	0.0766667	-4.50434	8.46569e-09	4.41238e-07	yes	AT2G34420 (E=8e-101) LHB1B2, LHCB1.5 | LHB1B2; chlorophyll binding	GO:0005623//cell;GO:0005622//intracellular;GO:0044444//cytoplasmic part;GO:0009579//thylakoid;GO:0043226//organelle;GO:0009536//plastid;GO:0044424//intracellular part;GO:0005575//cellular_component;GO:0005737//cytoplasm;GO:0043229//intracellular organelle;GO:0016020//membrane;GO:0043227//membrane-bounded organelle;GO:0044464//cell part;GO:0043231//intracellular membrane-bounded organelle	GO:0003676//nucleic acid binding;GO:1901363//heterocyclic compound binding;GO:0003674//molecular_function;GO:0008135//translation factor activity, RNA binding;GO:0097159//organic cyclic compound binding;GO:0005488//binding;GO:0003723//RNA binding	GO:0044267//cellular protein metabolic process;GO:0009058//biosynthetic process;GO:0006412//translation;GO:0008150//biological_process;GO:0043412//macromolecule modification;GO:0006807//nitrogen compound metabolic process;GO:1901576//organic substance biosynthetic process;GO:0044237//cellular metabolic process;GO:0006518//peptide metabolic process;GO:0019538//protein metabolic process;GO:0008152/…
Bra005424	13.5633	3.66667	3.04	0.816667	-1.89625	0.00455228	0.0451193	yes	AT2G34430 (E=1e-089) LHB1B1, LHCB1.4 | LHB1B1; chlorophyll binding	GO:0009536//plastid;GO:0005737//cytoplasm;GO:0043229//intracellular organelle;GO:0016020//membrane;GO:0043226//organelle;GO:0044464//cell part;GO:0005622//intracellular;GO:0005575//cellular_component;GO:0009579//thylakoid;GO:0043231//intracellular membrane-bounded organelle;GO:0044424//intracellular part;GO:0043227//membrane-bounded organelle;GO:0005623//cell;GO:0044444//cytoplasmic part	GO:0005488//binding;GO:0003674//molecular_function	GO:0044237//cellular metabolic process;GO:0015979//photosynthesis;GO:0044267//cellular protein metabolic process;GO:0071704//organic substance metabolic process;GO:0043412//macromolecule modification;GO:0044238//primary metabolic process;GO:0044260//cellular macromolecule metabolic process;GO:0043170//macromolecule metabolic process;GO:0036211//protein modification process;GO:0006091//generation …
Bra005425	2.77	222.333	0.383333	30.5133	6.3147	5.21266e-46	5.99726e-43	yes	AT2G34430 (E=2e-149) LHB1B1, LHCB1.4 | LHB1B1; chlorophyll binding	GO:0044444//cytoplasmic part;GO:0043229//intracellular organelle;GO:0005575//cellular_component;GO:0043227//membrane-bounded organelle;GO:0009536//plastid;GO:0009579//thylakoid;GO:0044424//intracellular part;GO:0043231//intracellular membrane-bounded organelle;GO:0016020//membrane;GO:0005737//cytoplasm;GO:0043226//organelle;GO:0044464//cell part;GO:0005623//cell;GO:0005622//intracellular	GO:0005488//binding;GO:0003674//molecular_function	GO:0006091//generation of precursor metabolites and energy;GO:0006464//cellular protein modification process;GO:0015979//photosynthesis;GO:0043170//macromolecule metabolic process;GO:0044238//primary metabolic process;GO:0009987//cellular process;GO:0008150//biological_process;GO:0008152//metabolic process;GO:0044267//cellular protein metabolic process;GO:0043412//macromolecule modification;GO:00…
Bra005447	6	0.666667	0.45	0.05	-3.16993	0.00335314	0.0357331	yes	AT2G34180 (E=3e-205) CIPK13, SnRK3.7, WL2, ATWL2 | CIPK13 (CBL-INTERACTING PROTEIN KINASE 13); ATP binding / kinase/ protein kinase/ protein serine/threonine kinase	-	GO:0036094//small molecule binding;GO:0005488//binding;GO:0097159//organic cyclic compound binding;GO:0016740//transferase activity;GO:0003674//molecular_function;GO:1901265//nucleoside phosphate binding;GO:0016772//transferase activity, transferring phosphorus-containing groups;GO:1901363//heterocyclic compound binding;GO:0016301//kinase activity;GO:0003824//catalytic activity;GO:0000166//nucleo…	GO:0007165//signal transduction;GO:0071704//organic substance metabolic process;GO:0008152//metabolic process;GO:0050896//response to stimulus;GO:0050794//regulation of cellular process;GO:0036211//protein modification process;GO:0008150//biological_process;GO:0044700//single organism signaling;GO:0007154//cell communication;GO:0050789//regulation of biological process;GO:0043170//macromolecule m…
Bra005452	42.3333	112	3.99	9.94667	1.31782	0.00189816	0.0224884	yes	-	-	-	-
Bra005474	31	85.6667	3.07	8.78667	1.51708	0.000850487	0.0117839	yes	AT2G33750 (E=2e-128) ATPUP2 | ATPUP2; purine transmembrane transporter	GO:0005575//cellular_component;GO:0016020//membrane	GO:0003674//molecular_function;GO:0005215//transporter activity	GO:0008150//biological_process;GO:0051234//establishment of localization;GO:0051179//localization;GO:0006810//transport
Bra005482	53.6667	123.667	2.65	6.19	1.22395	2.12879e-05	0.000522524	yes	AT2G33680 (E=0.0) | pentatricopeptide (PPR) repeat-containing protein	-	GO:0005488//binding;GO:0005515//protein binding;GO:0003674//molecular_function	-
Bra005511	29	64.6667	1.71667	3.77333	1.13623	0.00125538	0.0161212	yes	AT2G33290 (E=1e-172) SUVH2, SDG3, ATSUVH2 | SUVH2 (SU(VAR)3-9 HOMOLOG 2); histone methyltransferase	GO:0044424//intracellular part;GO:0005623//cell;GO:0005634//nucleus;GO:0005622//intracellular;GO:0043229//intracellular organelle;GO:0005575//cellular_component;GO:0043231//intracellular membrane-bounded organelle;GO:0043227//membrane-bounded organelle;GO:0044464//cell part;GO:0043226//organelle	GO:0016740//transferase activity;GO:0003674//molecular_function;GO:0003824//catalytic activity;GO:0005515//protein binding;GO:0005488//binding	GO:0008152//metabolic process;GO:0044260//cellular macromolecule metabolic process;GO:0036211//protein modification process;GO:0008150//biological_process;GO:0044238//primary metabolic process;GO:0071704//organic substance metabolic process;GO:0044267//cellular protein metabolic process;GO:0016043//cellular component organization;GO:0019538//protein metabolic process;GO:0044237//cellular metaboli…
Bra005521	6.33333	0	0.26	0.001	-8.02237	0.000118691	0.00228298	yes	AT1G04700 (E=6e-160) | protein kinase family protein	-	GO:0003674//molecular_function;GO:1901363//heterocyclic compound binding;GO:1901265//nucleoside phosphate binding;GO:0016740//transferase activity;GO:0005488//binding;GO:0036094//small molecule binding;GO:0000166//nucleotide binding;GO:0005515//protein binding;GO:0003824//catalytic activity;GO:0016301//kinase activity;GO:0016772//transferase activity, transferring phosphorus-containing groups;GO:…	GO:0009987//cellular process;GO:0043412//macromolecule modification;GO:0036211//protein modification process;GO:0019538//protein metabolic process;GO:0008150//biological_process;GO:0044267//cellular protein metabolic process;GO:0008152//metabolic process;GO:0044238//primary metabolic process;GO:0044237//cellular metabolic process;GO:0044260//cellular macromolecule metabolic process;GO:0071704//or…
Bra005526	7.33333	38	0.933333	4.81333	2.36657	6.02809e-08	2.61532e-06	yes	AT1G43670 (E=1e-089) | fructose-1,6-bisphosphatase, putative / D-fructose-1,6-bisphosphate 1-phosphohydrolase, putative / FBPase, putative	-	GO:0003674//molecular_function;GO:0016787//hydrolase activity;GO:0003824//catalytic activity	GO:0008150//biological_process;GO:0005975//carbohydrate metabolic process;GO:0071704//organic substance metabolic process;GO:0008152//metabolic process;GO:0044238//primary metabolic process
Bra005530	1.66667	15.3333	0.08	0.686667	3.10154	5.46481e-06	0.000153074	yes	AT2G33050 (E=0.0) AtRLP26 | AtRLP26 (Receptor Like Protein 26); kinase/ protein binding	-	GO:0005515//protein binding;GO:0003674//molecular_function;GO:0005488//binding	-
Bra005535	13.6667	45.6667	0.846667	2.83667	1.74433	3.56834e-06	0.000105268	yes	-	-	-	-
Bra005538	0.666667	14.3333	0.126667	2.70667	4.41741	1.51437e-05	0.00038591	yes	-	-	-	-
Bra005539	337.333	128	19.16	7.05667	-1.44104	5.62641e-09	3.03435e-07	yes	-	-	-	-
Bra005552	0	26	0.001	1.51333	10.5635	3.69724e-09	2.06566e-07	yes	AT2G32850 (E=5e-177) | protein kinase family protein	-	GO:0016772//transferase activity, transferring phosphorus-containing groups;GO:1901363//heterocyclic compound binding;GO:0016740//transferase activity;GO:0003674//molecular_function;GO:0016301//kinase activity;GO:0005488//binding;GO:0000166//nucleotide binding;GO:0003824//catalytic activity;GO:0097159//organic cyclic compound binding;GO:1901265//nucleoside phosphate binding;GO:0036094//small mole…	GO:0071704//organic substance metabolic process;GO:0008152//metabolic process;GO:0006464//cellular protein modification process;GO:0044238//primary metabolic process;GO:0008150//biological_process;GO:0043412//macromolecule modification;GO:0043170//macromolecule metabolic process;GO:0044260//cellular macromolecule metabolic process;GO:0019538//protein metabolic process;GO:0044237//cellular metabol…
Bra005574	15.3333	5.33333	1.92333	0.636667	-1.595	0.00438364	0.0438593	yes	-	-	-	-
Bra005599	89	24.6667	8.58333	2.40667	-1.8345	3.39733e-07	1.26997e-05	yes	AT2G32510 (E=1e-162) MAPKKK17 | MAPKKK17; ATP binding / kinase/ protein kinase/ protein serine/threonine kinase	-	GO:1901363//heterocyclic compound binding;GO:0003824//catalytic activity;GO:0016772//transferase activity, transferring phosphorus-containing groups;GO:0097159//organic cyclic compound binding;GO:0016301//kinase activity;GO:0016740//transferase activity;GO:0003674//molecular_function;GO:0000166//nucleotide binding;GO:1901265//nucleoside phosphate binding;GO:0036094//small molecule binding;GO:0005…	GO:0044238//primary metabolic process;GO:0043170//macromolecule metabolic process;GO:0008152//metabolic process;GO:0043412//macromolecule modification;GO:0071704//organic substance metabolic process;GO:0006464//cellular protein modification process;GO:0044267//cellular protein metabolic process;GO:0036211//protein modification process;GO:0019538//protein metabolic process;GO:0009987//cellular pro…
Bra005609	121	57.3333	16.5267	8.04	-1.03953	0.000419293	0.00659493	yes	-	-	-	-
Bra005612	241.333	68.6667	62.3733	18.16	-1.78017	1.99783e-10	1.34914e-08	yes	AT2G32090 (E=2e-070) | lactoylglutathione lyase family protein / glyoxalase I family protein	-	-	GO:0009058//biosynthetic process;GO:0050896//response to stimulus;GO:0008152//metabolic process;GO:0071704//organic substance metabolic process;GO:0009987//cellular process;GO:0009719//response to endogenous stimulus;GO:0044699//single-organism process;GO:0006629//lipid metabolic process;GO:0008150//biological_process;GO:0044710//single-organism metabolic process;GO:0044238//primary metabolic pro…
Bra005620	125.667	271.667	9.97667	20.8767	1.06526	0.00104633	0.013932	yes	AT2G31960 (E=1e-213) ATGSL03, GSL03, ATGSL3 | ATGSL03 (GLUCAN SYNTHASE-LIKE 3); 1,3-beta-glucan synthase/ transferase, transferring glycosyl groups	-	GO:0003824//catalytic activity;GO:0016740//transferase activity;GO:0003674//molecular_function	-
Bra005622	62.6667	2.33333	8.47	0.28	-4.91886	1.03992e-15	1.36304e-13	yes	AT2G31960 (E=2e-048) ATGSL03, GSL03, ATGSL3 | ATGSL03 (GLUCAN SYNTHASE-LIKE 3); 1,3-beta-glucan synthase/ transferase, transferring glycosyl groups	-	GO:0003674//molecular_function;GO:0003824//catalytic activity;GO:0016740//transferase activity	-
Bra005623	10.3333	0.666667	3.7	0.283333	-3.70695	0.00173423	0.0208726	yes	AT2G31945 (E=4e-026) | unknown protein	-	-	GO:0009058//biosynthetic process;GO:0008150//biological_process;GO:0008152//metabolic process;GO:0009987//cellular process;GO:0044699//single-organism process;GO:0009056//catabolic process;GO:0044710//single-organism metabolic process;GO:0019748//secondary metabolic process
Bra005688	14	1.33333	1.78	0.19	-3.22781	1.55536e-05	0.000395058	yes	AT5G01380 (E=3e-103) | transcription factor	GO:0005634//nucleus;GO:0043227//membrane-bounded organelle;GO:0044424//intracellular part;GO:0044464//cell part;GO:0043226//organelle;GO:0043231//intracellular membrane-bounded organelle;GO:0005623//cell;GO:0005575//cellular_component;GO:0043229//intracellular organelle;GO:0005622//intracellular	GO:0003682//chromatin binding;GO:0097159//organic cyclic compound binding;GO:1901363//heterocyclic compound binding;GO:0003676//nucleic acid binding;GO:0044877//macromolecular complex binding;GO:0001071//nucleic acid binding transcription factor activity;GO:0003677//DNA binding;GO:0005488//binding;GO:0003700//transcription factor activity, sequence-specific DNA binding;GO:0003674//molecular_funct…	GO:0044237//cellular metabolic process;GO:0008150//biological_process;GO:0071704//organic substance metabolic process;GO:0034641//cellular nitrogen compound metabolic process;GO:0009987//cellular process;GO:0046483//heterocycle metabolic process;GO:0008152//metabolic process;GO:0006725//cellular aromatic compound metabolic process;GO:1901360//organic cyclic compound metabolic process;GO:0044238//…
Bra005711	1.33333	12.6667	0.193333	1.80333	3.2215	3.8166e-05	0.000857879	yes	-	-	-	-
Bra005720	14.3333	39.3333	6.37333	17.37	1.44648	0.00106101	0.0141033	yes	AT3G09390 (E=2e-024) MT2A, ATMT-K, ATMT-1 | MT2A (METALLOTHIONEIN 2A); copper ion binding	-	GO:0003674//molecular_function;GO:0005488//binding	-
Bra005723	12	32.6667	3.82667	10.7967	1.49643	0.000689897	0.00995862	yes	-	-	-	-
Bra005799	12	43.3333	0.85	3.04	1.83854	2.60824e-05	0.000620386	yes	AT5G04310 (E=6e-237) | pectate lyase family protein	-	GO:0003824//catalytic activity;GO:0003674//molecular_function;GO:0005488//binding	GO:0008150//biological_process;GO:0071704//organic substance metabolic process;GO:0044238//primary metabolic process;GO:0005975//carbohydrate metabolic process;GO:0009056//catabolic process;GO:0008152//metabolic process
Bra005809	18.3333	4.66667	2.17	0.54	-2.00666	0.000536385	0.00809634	yes	AT5G04490 (E=5e-096) VTE5 | VTE5 (vitamin E pathway gene5); phosphatidate cytidylyltransferase/ phytol kinase	GO:0005575//cellular_component;GO:0016020//membrane	GO:0003674//molecular_function;GO:0003824//catalytic activity;GO:0016740//transferase activity	-
Bra005826	14	49.3333	1.44667	4.78667	1.72629	0.00112499	0.0147954	yes	AT5G04890 (E=4e-080) RTM2 | RTM2 (RESTRICTED TEV MOVEMENT 2)	GO:0044464//cell part;GO:0005575//cellular_component;GO:0016020//membrane;GO:0071944//cell periphery;GO:0005623//cell;GO:0005886//plasma membrane	-	GO:0009987//cellular process;GO:0008150//biological_process;GO:0051234//establishment of localization;GO:0050896//response to stimulus;GO:0009607//response to biotic stimulus;GO:0006810//transport;GO:0051179//localization;GO:0009605//response to external stimulus
Bra005841	18.6667	5.66667	2.50333	0.746667	-1.74531	0.00312489	0.0338082	yes	-	-	-	-
Bra005912	0.666667	6	0.0666667	0.57	3.09592	0.00331967	0.035486	yes	AT5G06800 (E=1e-153) | myb family transcription factor	-	GO:0044877//macromolecular complex binding;GO:0005488//binding;GO:0003677//DNA binding;GO:0097159//organic cyclic compound binding;GO:0003674//molecular_function;GO:1901363//heterocyclic compound binding;GO:0003682//chromatin binding;GO:0003676//nucleic acid binding	-
Bra005927	16.6667	51.3333	1.90667	5.68	1.57484	0.000197216	0.00350076	yes	AT5G07200 (E=5e-165) YAP169, GA20OX3, ATGA20OX3 | YAP169; gibberellin 20-oxidase	-	GO:0003674//molecular_function;GO:0005488//binding;GO:0003824//catalytic activity	GO:0008150//biological_process;GO:0008152//metabolic process
Bra005935	190.667	78.3333	16.5467	6.89	-1.26396	8.58824e-07	2.96428e-05	yes	AT5G07440 (E=6e-237) GDH2 | GDH2 (GLUTAMATE DEHYDROGENASE 2); ATP binding / glutamate dehydrogenase [NAD(P)+]/ glutamate dehydrogenase/ oxidoreductase	-	GO:0003824//catalytic activity;GO:0003674//molecular_function	GO:0008150//biological_process;GO:0008152//metabolic process;GO:0009987//cellular process
Bra006021	3	18.6667	0.35	2.17667	2.63669	1.10571e-05	0.000288637	yes	-	-	-	-
Bra006097	10	31	0.55	1.65333	1.58787	0.000761437	0.0108352	yes	AT5G11470 (E=2e-079) | DNA binding / nucleic acid binding	-	GO:0005488//binding;GO:0003677//DNA binding;GO:0044877//macromolecular complex binding;GO:0097159//organic cyclic compound binding;GO:0003682//chromatin binding;GO:0000166//nucleotide binding;GO:1901363//heterocyclic compound binding;GO:0003676//nucleic acid binding;GO:1901265//nucleoside phosphate binding;GO:0036094//small molecule binding;GO:0003674//molecular_function	-
Bra006107	180.333	54	11.0033	3.3	-1.7374	2.04998e-09	1.197e-07	yes	AT5G11670 (E=0.0) ATNADP-ME2 | ATNADP-ME2 (NADP-malic enzyme 2); malate dehydrogenase (oxaloacetate-decarboxylating) (NADP+)/ malic enzyme/ oxidoreductase, acting on NADH or NADPH, NAD or NADP as acceptor	-	GO:0097159//organic cyclic compound binding;GO:0003674//molecular_function;GO:1901363//heterocyclic compound binding;GO:0003824//catalytic activity;GO:0036094//small molecule binding;GO:0000166//nucleotide binding;GO:1901265//nucleoside phosphate binding;GO:0005488//binding	GO:0008152//metabolic process;GO:0009987//cellular process;GO:0008150//biological_process
Bra006125	23	49.6667	2.97333	6.35667	1.09619	0.00148756	0.0184838	yes	-	-	-	-
Bra006126	14	107	2.67667	19.5933	2.87185	1.04875e-11	8.46189e-10	yes	AT5G11900 (E=1e-104) | eukaryotic translation initiation factor SUI1 family protein	GO:0005737//cytoplasm;GO:0044424//intracellular part;GO:0043226//organelle;GO:0043229//intracellular organelle;GO:0030529//intracellular ribonucleoprotein complex;GO:0005840//ribosome;GO:1990904//ribonucleoprotein complex;GO:0005575//cellular_component;GO:0043228//non-membrane-bounded organelle;GO:0043232//intracellular non-membrane-bounded organelle;GO:0032991//macromolecular complex;GO:0044444/…	GO:1901363//heterocyclic compound binding;GO:0008135//translation factor activity, RNA binding;GO:0003674//molecular_function;GO:0003676//nucleic acid binding;GO:0003723//RNA binding;GO:0097159//organic cyclic compound binding;GO:0005488//binding	GO:0044237//cellular metabolic process;GO:0044249//cellular biosynthetic process;GO:0044238//primary metabolic process;GO:0034641//cellular nitrogen compound metabolic process;GO:0044260//cellular macromolecule metabolic process;GO:0044271//cellular nitrogen compound biosynthetic process;GO:0019538//protein metabolic process;GO:0009058//biosynthetic process;GO:0006412//translation;GO:1901564//org…
Bra006127	288.667	59.3333	35.6967	7.12667	-2.32449	1.13139e-17	1.72281e-15	yes	-	-	-	-
Bra006136	18.6667	4.66667	1.13667	0.293333	-1.9542	0.000648195	0.00943557	yes	AT5G11980 (E=2e-158) | conserved oligomeric Golgi complex component-related / COG complex component-related	GO:0005623//cell;GO:0005794//Golgi apparatus;GO:0005622//intracellular;GO:0044464//cell part;GO:0043226//organelle;GO:0043229//intracellular organelle;GO:0043231//intracellular membrane-bounded organelle;GO:0044444//cytoplasmic part;GO:0005737//cytoplasm;GO:0043227//membrane-bounded organelle;GO:0012505//endomembrane system;GO:0044424//intracellular part;GO:0005575//cellular_component	-	-
Bra006137	44	5.33333	11.2133	1.41333	-2.98804	0.00174664	0.0209409	yes	-	-	-	-
Bra006143	78	19	22.5	5.59667	-2.00729	4.18421e-09	2.32519e-07	yes	AT5G12190 (E=2e-064) | RNA recognition motif (RRM)-containing protein	-	GO:0097159//organic cyclic compound binding;GO:1901265//nucleoside phosphate binding;GO:0005488//binding;GO:0003676//nucleic acid binding;GO:1901363//heterocyclic compound binding;GO:0036094//small molecule binding;GO:0003674//molecular_function;GO:0000166//nucleotide binding	-
Bra006146	89.6667	0.666667	2.93333	0.0233333	-6.974	5.91491e-28	2.04156e-25	yes	AT5G11250 (E=6e-206) | disease resistance protein (TIR-NBS-LRR class), putative	-	GO:0000166//nucleotide binding;GO:0005515//protein binding;GO:0036094//small molecule binding;GO:0003824//catalytic activity;GO:0005488//binding;GO:0097159//organic cyclic compound binding;GO:1901363//heterocyclic compound binding;GO:0003674//molecular_function;GO:0016787//hydrolase activity;GO:1901265//nucleoside phosphate binding	GO:0050896//response to stimulus;GO:0051716//cellular response to stimulus;GO:0008150//biological_process;GO:0007154//cell communication;GO:0023052//signaling;GO:0050794//regulation of cellular process;GO:0044699//single-organism process;GO:0007165//signal transduction;GO:0006950//response to stress;GO:0065007//biological regulation;GO:0044763//single-organism cellular process;GO:0044700//single …
Bra006178	16.6667	2	4.21667	0.483333	-3.12501	3.8875e-05	0.000872552	yes	AT5G13080 (E=4e-067) WRKY75, ATWRKY75 | WRKY75; transcription factor	-	GO:0001071//nucleic acid binding transcription factor activity;GO:0003676//nucleic acid binding;GO:0005488//binding;GO:0003700//transcription factor activity, sequence-specific DNA binding;GO:0003674//molecular_function;GO:0097159//organic cyclic compound binding;GO:0003677//DNA binding;GO:1901363//heterocyclic compound binding	GO:0009987//cellular process;GO:0006725//cellular aromatic compound metabolic process;GO:0034641//cellular nitrogen compound metabolic process;GO:0044237//cellular metabolic process;GO:1901360//organic cyclic compound metabolic process;GO:0071704//organic substance metabolic process;GO:0008150//biological_process;GO:0006807//nitrogen compound metabolic process;GO:0046483//heterocycle metabolic pr…
Bra006181	50	19.6667	3.06	1.19	-1.36257	0.000499496	0.00763975	yes	AT5G13110 (E=5e-308) G6PD2 | G6PD2 (GLUCOSE-6-PHOSPHATE DEHYDROGENASE 2); glucose-6-phosphate dehydrogenase	-	GO:1901265//nucleoside phosphate binding;GO:0005488//binding;GO:1901363//heterocyclic compound binding;GO:0097159//organic cyclic compound binding;GO:0003824//catalytic activity;GO:0000166//nucleotide binding;GO:0003674//molecular_function;GO:0036094//small molecule binding	GO:0005975//carbohydrate metabolic process;GO:0006807//nitrogen compound metabolic process;GO:0009987//cellular process;GO:0044238//primary metabolic process;GO:0046483//heterocycle metabolic process;GO:0008150//biological_process;GO:0008152//metabolic process;GO:0034641//cellular nitrogen compound metabolic process;GO:0006139//nucleobase-containing compound metabolic process;GO:0006725//cellular…
Bra006182	128.333	50.3333	18.13	7.15	-1.34236	7.30745e-07	2.56496e-05	yes	AT5G13120 (E=1e-118) | peptidyl-prolyl cis-trans isomerase cyclophilin-type family protein	GO:0043227//membrane-bounded organelle;GO:0044464//cell part;GO:0043229//intracellular organelle;GO:0005623//cell;GO:0009536//plastid;GO:0043226//organelle;GO:0009579//thylakoid;GO:0005622//intracellular;GO:0005575//cellular_component;GO:0044444//cytoplasmic part;GO:0016020//membrane;GO:0044424//intracellular part;GO:0043231//intracellular membrane-bounded organelle;GO:0005737//cytoplasm	GO:0003824//catalytic activity;GO:0005488//binding;GO:0005515//protein binding;GO:0003674//molecular_function	GO:0044238//primary metabolic process;GO:0044260//cellular macromolecule metabolic process;GO:0044237//cellular metabolic process;GO:0036211//protein modification process;GO:0009987//cellular process;GO:0071704//organic substance metabolic process;GO:0043412//macromolecule modification;GO:0008152//metabolic process;GO:0043170//macromolecule metabolic process;GO:0006464//cellular protein modificat…
Bra006195	184	88	25.58	12.2367	-1.06381	6.64438e-06	0.000183142	yes	AT5G13330 (E=1e-058) Rap2.6L | Rap2.6L (related to AP2 6L); DNA binding / transcription factor	GO:0005622//intracellular;GO:0043231//intracellular membrane-bounded organelle;GO:0044464//cell part;GO:0043227//membrane-bounded organelle;GO:0005575//cellular_component;GO:0005634//nucleus;GO:0005623//cell;GO:0043226//organelle;GO:0043229//intracellular organelle;GO:0044424//intracellular part	GO:0097159//organic cyclic compound binding;GO:0005488//binding;GO:0003677//DNA binding;GO:1901363//heterocyclic compound binding;GO:0003674//molecular_function;GO:0001071//nucleic acid binding transcription factor activity;GO:0003700//transcription factor activity, sequence-specific DNA binding;GO:0003676//nucleic acid binding	GO:0009058//biosynthetic process;GO:1901360//organic cyclic compound metabolic process;GO:0006725//cellular aromatic compound metabolic process;GO:0009987//cellular process;GO:0008150//biological_process;GO:0034641//cellular nitrogen compound metabolic process;GO:0006139//nucleobase-containing compound metabolic process;GO:0071704//organic substance metabolic process;GO:0046483//heterocycle metab…
Bra006197	624	61.6667	51.7867	5.18333	-3.32063	3.72676e-41	3.30766e-38	yes	AT5G13420 (E=5e-198) | transaldolase, putative	GO:0005622//intracellular;GO:0005623//cell;GO:0044464//cell part;GO:0005737//cytoplasm;GO:0005575//cellular_component;GO:0044424//intracellular part	GO:0003824//catalytic activity;GO:0016740//transferase activity;GO:0003674//molecular_function	GO:0006807//nitrogen compound metabolic process;GO:0006725//cellular aromatic compound metabolic process;GO:0005975//carbohydrate metabolic process;GO:0006139//nucleobase-containing compound metabolic process;GO:0008152//metabolic process;GO:0044237//cellular metabolic process;GO:0034641//cellular nitrogen compound metabolic process;GO:0044238//primary metabolic process;GO:1901360//organic cyclic…
Bra006198	59.6667	13.6667	7.68667	1.75	-2.135	4.69549e-08	2.06602e-06	yes	AT5G13440 (E=3e-137) | ubiquinol-cytochrome C reductase iron-sulfur subunit, mitochondrial, putative / Rieske iron-sulfur protein, putative	GO:0043226//organelle;GO:0005737//cytoplasm;GO:0016020//membrane;GO:0005623//cell;GO:0005622//intracellular;GO:0044444//cytoplasmic part;GO:0044464//cell part;GO:0005739//mitochondrion;GO:0005575//cellular_component;GO:0043231//intracellular membrane-bounded organelle;GO:0043227//membrane-bounded organelle;GO:0043229//intracellular organelle;GO:0044424//intracellular part	GO:0005488//binding;GO:0005215//transporter activity;GO:0003674//molecular_function;GO:0003824//catalytic activity	GO:0008150//biological_process;GO:0008152//metabolic process
Bra006205	890	267.333	19.9933	6.02333	-1.73089	1.77388e-17	2.67494e-15	yes	AT5G13530 (E=0.0) KEG | KEG (KEEP ON GOING); protein binding / protein kinase/ ubiquitin-protein ligase	GO:0005575//cellular_component;GO:0044424//intracellular part;GO:0043229//intracellular organelle;GO:0044464//cell part;GO:0005623//cell;GO:0005622//intracellular;GO:0044444//cytoplasmic part;GO:0005794//Golgi apparatus;GO:0005737//cytoplasm;GO:0043226//organelle;GO:0012505//endomembrane system;GO:0043227//membrane-bounded organelle;GO:0043231//intracellular membrane-bounded organelle	GO:1901265//nucleoside phosphate binding;GO:0036094//small molecule binding;GO:0016301//kinase activity;GO:0003824//catalytic activity;GO:0016740//transferase activity;GO:0097159//organic cyclic compound binding;GO:1901363//heterocyclic compound binding;GO:0016772//transferase activity, transferring phosphorus-containing groups;GO:0003674//molecular_function;GO:0005515//protein binding;GO:0000166…	GO:1901360//organic cyclic compound metabolic process;GO:0008150//biological_process;GO:0009056//catabolic process;GO:0006464//cellular protein modification process;GO:0007154//cell communication;GO:0006725//cellular aromatic compound metabolic process;GO:0050794//regulation of cellular process;GO:0009987//cellular process;GO:0044700//single organism signaling;GO:0006950//response to stress;GO:00…
Bra006210	102.333	21.6667	7.83	1.73667	-2.17269	2.10012e-09	1.22169e-07	yes	AT5G13700 (E=9e-237) ATPAO1, APAO, PAO1 | ATPAO1 (ARABIDOPSIS THALIANA POLYAMINE OXIDASE 1); FAD binding / polyamine oxidase	-	GO:1901363//heterocyclic compound binding;GO:0003674//molecular_function;GO:0036094//small molecule binding;GO:1901265//nucleoside phosphate binding;GO:0000166//nucleotide binding;GO:0005488//binding;GO:0003824//catalytic activity;GO:0097159//organic cyclic compound binding	GO:0008152//metabolic process;GO:0009056//catabolic process;GO:0008150//biological_process;GO:0009987//cellular process
Bra006219	31.6667	3.66667	2.37667	0.283333	-3.06837	1.95276e-06	6.17505e-05	yes	AT5G13840 (E=2e-235) FZR3 | FZR3 (FIZZY-RELATED 3); signal transducer	-	GO:0003674//molecular_function;GO:0005488//binding;GO:0098772//molecular function regulator;GO:0005515//protein binding;GO:0030234//enzyme regulator activity	GO:0044267//cellular protein metabolic process;GO:0010468//regulation of gene expression;GO:0006139//nucleobase-containing compound metabolic process;GO:0090304//nucleic acid metabolic process;GO:0040007//growth;GO:0009653//anatomical structure morphogenesis;GO:0019538//protein metabolic process;GO:0071840//cellular component organization or biogenesis;GO:0016049//cell growth;GO:0016043//cellular…
Bra006227	2025.67	4113.33	72.17	145.267	1.00923	0.000145831	0.00271263	yes	AT5G13980 (E=0.0) | glycosyl hydrolase family 38 protein	GO:0005575//cellular_component;GO:0071944//cell periphery;GO:0016020//membrane;GO:0043231//intracellular membrane-bounded organelle;GO:0043227//membrane-bounded organelle;GO:0005622//intracellular;GO:0005737//cytoplasm;GO:0030312//external encapsulating structure;GO:0044424//intracellular part;GO:0005576//extracellular region;GO:0005618//cell wall;GO:0044464//cell part;GO:0043229//intracellular o…	GO:0005488//binding;GO:0003824//catalytic activity;GO:0003674//molecular_function;GO:0016787//hydrolase activity;GO:0030246//carbohydrate binding	GO:0044238//primary metabolic process;GO:0009058//biosynthetic process;GO:0005975//carbohydrate metabolic process;GO:0009987//cellular process;GO:0008152//metabolic process;GO:0071704//organic substance metabolic process;GO:0016043//cellular component organization;GO:0071840//cellular component organization or biogenesis;GO:0008150//biological_process
Bra006239	147	61	8.97667	3.82333	-1.23135	0.000199952	0.0035372	yes	-	-	-	-
Bra006243	13.3333	2.33333	0.68	0.106667	-2.67243	0.000404896	0.00642374	yes	AT5G14210 (E=2e-190) | leucine-rich repeat transmembrane protein kinase, putative	-	GO:0003674//molecular_function;GO:0097159//organic cyclic compound binding;GO:0016740//transferase activity;GO:0016772//transferase activity, transferring phosphorus-containing groups;GO:1901265//nucleoside phosphate binding;GO:0005515//protein binding;GO:1901363//heterocyclic compound binding;GO:0036094//small molecule binding;GO:0003824//catalytic activity;GO:0016301//kinase activity;GO:0005488…	GO:0043412//macromolecule modification;GO:0008150//biological_process;GO:0071704//organic substance metabolic process;GO:0008152//metabolic process;GO:0044260//cellular macromolecule metabolic process;GO:0044237//cellular metabolic process;GO:0036211//protein modification process;GO:0006464//cellular protein modification process;GO:0019538//protein metabolic process;GO:0044267//cellular protein m…
Bra006248	39.6667	18	8.45	3.86667	-1.12786	0.00339774	0.036134	yes	AT5G14320 (E=2e-082) | 30S ribosomal protein S13, chloroplast (CS13)	GO:0044444//cytoplasmic part;GO:0009536//plastid;GO:1990904//ribonucleoprotein complex;GO:0032991//macromolecular complex;GO:0043227//membrane-bounded organelle;GO:0043231//intracellular membrane-bounded organelle;GO:0005623//cell;GO:0005840//ribosome;GO:0043228//non-membrane-bounded organelle;GO:0044464//cell part;GO:0043229//intracellular organelle;GO:0005575//cellular_component;GO:0044424//int…	GO:0003676//nucleic acid binding;GO:0005488//binding;GO:0003723//RNA binding;GO:1901363//heterocyclic compound binding;GO:0097159//organic cyclic compound binding;GO:0003674//molecular_function;GO:0005198//structural molecule activity	GO:0006518//peptide metabolic process;GO:0043604//amide biosynthetic process;GO:0006807//nitrogen compound metabolic process;GO:0034645//cellular macromolecule biosynthetic process;GO:0044271//cellular nitrogen compound biosynthetic process;GO:1901566//organonitrogen compound biosynthetic process;GO:0044249//cellular biosynthetic process;GO:1901564//organonitrogen compound metabolic process;GO:00…
Bra006262	264	109.333	19.7667	8.08333	-1.29005	3.99101e-08	1.78128e-06	yes	AT5G14590 (E=3e-250) | isocitrate dehydrogenase, putative / NADP+ isocitrate dehydrogenase, putative	GO:0005737//cytoplasm;GO:0005575//cellular_component;GO:0044444//cytoplasmic part;GO:0005739//mitochondrion;GO:0044464//cell part;GO:0043229//intracellular organelle;GO:0043226//organelle;GO:0043227//membrane-bounded organelle;GO:0005623//cell;GO:0044424//intracellular part;GO:0005622//intracellular;GO:0009579//thylakoid;GO:0043231//intracellular membrane-bounded organelle;GO:0009536//plastid	GO:1901363//heterocyclic compound binding;GO:0097159//organic cyclic compound binding;GO:0000166//nucleotide binding;GO:0036094//small molecule binding;GO:0003674//molecular_function;GO:1901265//nucleoside phosphate binding;GO:0005488//binding;GO:0003824//catalytic activity	GO:0008150//biological_process;GO:0008152//metabolic process;GO:0044237//cellular metabolic process;GO:0006091//generation of precursor metabolites and energy;GO:0009987//cellular process
Bra006263	337.097	53.89	29.7767	4.66333	-2.67475	3.35528e-25	9.30612e-23	yes	AT5G14640 (E=2e-234) ATSK13, SK13 | SK13 (SHAGGY-LIKE KINASE 13); ATP binding / protein kinase/ protein serine/threonine kinase	GO:0005829//cytosol;GO:0005623//cell;GO:0005575//cellular_component;GO:0005737//cytoplasm;GO:0044424//intracellular part;GO:0044444//cytoplasmic part;GO:0044464//cell part;GO:0005622//intracellular	GO:0003674//molecular_function;GO:0016772//transferase activity, transferring phosphorus-containing groups;GO:0036094//small molecule binding;GO:0000166//nucleotide binding;GO:1901265//nucleoside phosphate binding;GO:0016740//transferase activity;GO:1901363//heterocyclic compound binding;GO:0097159//organic cyclic compound binding;GO:0016301//kinase activity;GO:0005488//binding;GO:0003824//cataly…	GO:0019538//protein metabolic process;GO:0044238//primary metabolic process;GO:0071704//organic substance metabolic process;GO:0008150//biological_process;GO:0043170//macromolecule metabolic process;GO:0044260//cellular macromolecule metabolic process;GO:0006464//cellular protein modification process;GO:0044267//cellular protein metabolic process;GO:0008152//metabolic process;GO:0043412//macromol…
Bra006267	5.66667	0	2.34333	0.001	-11.1943	0.000429597	0.0067297	yes	-	-	-	-
Bra006270	73.6667	36	6.08667	2.93667	-1.05147	0.00121867	0.0157475	yes	AT5G14800 (E=2e-117) P5CR, AT-P5R, AT-P5C1, EMB2772 | P5CR (PYRROLINE-5- CARBOXYLATE (P5C) REDUCTASE); pyrroline-5-carboxylate reductase	-	GO:0003824//catalytic activity;GO:0003674//molecular_function;GO:0016740//transferase activity	GO:0009987//cellular process;GO:0008152//metabolic process;GO:0008150//biological_process;GO:0009058//biosynthetic process
Bra006290	35	12.3333	8.12333	2.84	-1.51618	0.000824539	0.011491	yes	AT5G15220 (E=5e-072) | ribosomal protein L27 family protein	GO:0044444//cytoplasmic part;GO:1990904//ribonucleoprotein complex;GO:0005575//cellular_component;GO:0005737//cytoplasm;GO:0005840//ribosome;GO:0044424//intracellular part;GO:0043229//intracellular organelle;GO:0005623//cell;GO:0043226//organelle;GO:0030529//intracellular ribonucleoprotein complex;GO:0032991//macromolecular complex;GO:0005622//intracellular;GO:0044464//cell part;GO:0043232//intra…	GO:0005198//structural molecule activity;GO:0003674//molecular_function	GO:0008152//metabolic process;GO:0008150//biological_process;GO:0043604//amide biosynthetic process;GO:0043603//cellular amide metabolic process;GO:0044271//cellular nitrogen compound biosynthetic process;GO:0044260//cellular macromolecule metabolic process;GO:0044267//cellular protein metabolic process;GO:0006412//translation;GO:0009059//macromolecule biosynthetic process;GO:0043043//peptide bio…
Bra006292	7.66667	0.666667	1.39667	0.13	-3.4254	0.0020661	0.0241737	yes	AT5G15260 (E=1e-056) | structural constituent of ribosome	GO:0030529//intracellular ribonucleoprotein complex;GO:1990904//ribonucleoprotein complex;GO:0005737//cytoplasm;GO:0044444//cytoplasmic part;GO:0043229//intracellular organelle;GO:0005622//intracellular;GO:0005623//cell;GO:0043232//intracellular non-membrane-bounded organelle;GO:0005840//ribosome;GO:0044424//intracellular part;GO:0043228//non-membrane-bounded organelle;GO:0032991//macromolecular …	GO:0003674//molecular_function;GO:0005198//structural molecule activity	GO:0044267//cellular protein metabolic process;GO:0019538//protein metabolic process;GO:0009059//macromolecule biosynthetic process;GO:0043043//peptide biosynthetic process;GO:1901576//organic substance biosynthetic process;GO:0009987//cellular process;GO:0044249//cellular biosynthetic process;GO:0043603//cellular amide metabolic process;GO:0008150//biological_process;GO:0044271//cellular nitroge…
Bra006313	65.3333	26.6667	2.83667	1.15333	-1.29839	0.000312504	0.00515488	yes	AT5G15630 (E=2e-244) COBL4, IRX6 | IRX6	GO:0016020//membrane;GO:0005575//cellular_component	GO:0003674//molecular_function;GO:0005515//protein binding;GO:0005488//binding	GO:0016043//cellular component organization;GO:0009987//cellular process;GO:0008150//biological_process;GO:0044699//single-organism process;GO:0044763//single-organism cellular process;GO:0071840//cellular component organization or biogenesis;GO:0040007//growth;GO:0016049//cell growth
Bra006350	153.667	24.6667	10.03	1.59333	-2.6542	7.10233e-14	7.55571e-12	yes	AT5G16370 (E=8e-299) AAE5 | AAE5 (ACYL ACTIVATING ENZYME 5); catalytic	-	GO:0003824//catalytic activity;GO:0003674//molecular_function	GO:0008150//biological_process;GO:0008152//metabolic process
Bra006351	79.3333	3.66667	15.4367	0.69	-4.48362	5.57447e-18	8.61519e-16	yes	-	-	-	-
Bra006352	57.6667	0	6.80333	0.001	-12.732	2.29181e-22	5.35284e-20	yes	AT5G16390 (E=6e-088) CAC1, CAC1A, BCCP, BCCP1 | CAC1 (CHLOROPLASTIC ACETYLCOENZYME A CARBOXYLASE 1); acetyl-CoA carboxylase/ biotin binding	GO:0044464//cell part;GO:0005622//intracellular;GO:0044424//intracellular part;GO:0005575//cellular_component;GO:0005623//cell;GO:0005737//cytoplasm	GO:0003674//molecular_function;GO:0003824//catalytic activity	GO:0044238//primary metabolic process;GO:0008150//biological_process;GO:0044710//single-organism metabolic process;GO:0071704//organic substance metabolic process;GO:0044699//single-organism process;GO:0009058//biosynthetic process;GO:0009987//cellular process;GO:0006629//lipid metabolic process;GO:0008152//metabolic process
Bra006361	61.3333	28	4.33333	1.96333	-1.14217	0.000335458	0.00547017	yes	AT5G16530 (E=2e-117) PIN5 | PIN5 (PIN-FORMED 5); auxin:hydrogen symporter/ transporter	GO:0005575//cellular_component;GO:0016020//membrane	-	GO:0008150//biological_process;GO:0051234//establishment of localization;GO:0009987//cellular process;GO:0006810//transport;GO:0051179//localization
Bra006364	84.3333	31.6667	18.3633	6.81667	-1.42969	9.58085e-06	0.000254811	yes	-	-	-	-
Bra006367	183	11.3333	8.64667	0.49	-4.14129	7.2478e-17	1.03754e-14	yes	-	-	-	-
Bra006374	1.66667	11.3333	0.103333	0.726667	2.81399	0.00406861	0.0413165	yes	AT2G20800 (E=4e-291) NDB4 | NDB4 (NAD(P)H dehydrogenase B4); NADH dehydrogenase	-	GO:1901363//heterocyclic compound binding;GO:1901265//nucleoside phosphate binding;GO:0000166//nucleotide binding;GO:0005488//binding;GO:0003674//molecular_function;GO:0097159//organic cyclic compound binding;GO:0036094//small molecule binding;GO:0003824//catalytic activity	GO:0008152//metabolic process;GO:0008150//biological_process
Bra006375	44	96	2.56667	5.63667	1.13495	0.000738397	0.0105557	yes	AT2G20790 (E=9e-280) | protein binding	GO:0005575//cellular_component;GO:0005622//intracellular;GO:0044424//intracellular part;GO:0005623//cell;GO:0044464//cell part;GO:0005737//cytoplasm;GO:0016020//membrane	-	GO:0008150//biological_process;GO:0051234//establishment of localization;GO:0006810//transport;GO:0051179//localization
Bra006386	147.667	1	23.5733	0.15	-7.29605	2.03144e-40	1.70553e-37	yes	-	-	-	-
Bra006389	4.33333	0	0.48	0.001	-8.90689	0.00303822	0.0331039	yes	-	-	-	-
Bra006394	73.6667	26	7.48	2.42333	-1.62605	0.000345296	0.00560412	yes	AT5G17300 (E=2e-122) | myb family transcription factor	-	GO:1901363//heterocyclic compound binding;GO:0003677//DNA binding;GO:0003682//chromatin binding;GO:0005488//binding;GO:0003676//nucleic acid binding;GO:0097159//organic cyclic compound binding;GO:0003674//molecular_function;GO:0044877//macromolecular complex binding	-
Bra006395	1095.33	462	83.69	35.21	-1.24907	2.35144e-07	9.14206e-06	yes	AT5G17310 (E=2e-244) | UTP--glucose-1-phosphate uridylyltransferase, putative / UDP-glucose pyrophosphorylase, putative / UGPase, putative	GO:0005829//cytosol;GO:0044464//cell part;GO:0071944//cell periphery;GO:0005886//plasma membrane;GO:0044424//intracellular part;GO:0005737//cytoplasm;GO:0005622//intracellular;GO:0044444//cytoplasmic part;GO:0005623//cell;GO:0005575//cellular_component;GO:0016020//membrane	GO:0003674//molecular_function;GO:0003824//catalytic activity;GO:0016740//transferase activity	GO:0009058//biosynthetic process;GO:0046483//heterocycle metabolic process;GO:0016043//cellular component organization;GO:0006139//nucleobase-containing compound metabolic process;GO:0008152//metabolic process;GO:1901360//organic cyclic compound metabolic process;GO:0034641//cellular nitrogen compound metabolic process;GO:0044238//primary metabolic process;GO:0044707//single-multicellular organis…
Bra006415	31.6667	103.667	3.46333	11.2667	1.70183	7.27498e-06	0.000199462	yes	AT5G17600 (E=2e-051) | zinc finger (C3HC4-type RING finger) family protein	-	GO:0003674//molecular_function;GO:0005488//binding;GO:0005515//protein binding	-
Bra006418	7.66667	60.6667	0.556667	4.51667	3.02037	2.17637e-08	1.01971e-06	yes	AT5G17760 (E=8e-178) | AAA-type ATPase family protein	-	GO:0003824//catalytic activity;GO:0005488//binding;GO:1901363//heterocyclic compound binding;GO:0000166//nucleotide binding;GO:0036094//small molecule binding;GO:0003674//molecular_function;GO:0097159//organic cyclic compound binding;GO:0016787//hydrolase activity;GO:1901265//nucleoside phosphate binding	-
Bra006427	106.993	1	9.05667	0.0933333	-6.60044	4.61184e-26	1.3644e-23	yes	AT5G17900 (E=9e-119) | FUNCTIONS IN: molecular_function unknown; INVOLVED IN: biological_process unknown; LOCATED IN: extracellular region; CONTAINS InterPro DOMAIN/s: Micro-fibrillar-associated 1, C-terminal (InterPro:IPR009730); BEST Arabidopsis thaliana protein match is: unknown protein (TAIR:AT4G08580.1); Has 36643 Blast hits to 21191 proteins in 1090 species: Archae - 183; Bacteria - 2726; M…	GO:0005575//cellular_component;GO:0044421//extracellular region part;GO:0005576//extracellular region;GO:0031012//extracellular matrix;GO:0005578//proteinaceous extracellular matrix	-	-
Bra006449	176.667	61	19.14	6.63	-1.52951	7.27184e-08	3.10719e-06	yes	AT5G18270 (E=1e-172) ANAC087 | ANAC087; transcription factor	GO:0043227//membrane-bounded organelle;GO:0005634//nucleus;GO:0005622//intracellular;GO:0043231//intracellular membrane-bounded organelle;GO:0043229//intracellular organelle;GO:0005575//cellular_component;GO:0043226//organelle;GO:0005623//cell;GO:0044424//intracellular part;GO:0044464//cell part	GO:0003674//molecular_function;GO:0003676//nucleic acid binding;GO:1901363//heterocyclic compound binding;GO:0097159//organic cyclic compound binding;GO:0005488//binding;GO:0003677//DNA binding	GO:0071704//organic substance metabolic process;GO:1901360//organic cyclic compound metabolic process;GO:0046483//heterocycle metabolic process;GO:0034641//cellular nitrogen compound metabolic process;GO:0008152//metabolic process;GO:0006725//cellular aromatic compound metabolic process;GO:0044237//cellular metabolic process;GO:0009987//cellular process;GO:0006139//nucleobase-containing compound …
Bra006453	158.667	78.6667	8.09667	3.97333	-1.02698	0.00268545	0.0299214	yes	AT4G24840 (E=2e-240) | FUNCTIONS IN: molecular_function unknown; INVOLVED IN: protein transport, Golgi organization; LOCATED IN: vacuole; EXPRESSED IN: 23 plant structures; EXPRESSED DURING: 13 growth stages; CONTAINS InterPro DOMAIN/s: COG complex component, COG2 (InterPro:IPR009316); Has 214 Blast hits to 204 proteins in 99 species: Archae - 0; Bacteria - 0; Metazoa - 105; Fungi - 56; Plants - …	GO:0016020//membrane;GO:0005575//cellular_component	-	GO:0071840//cellular component organization or biogenesis;GO:0016043//cellular component organization;GO:0051179//localization;GO:0006810//transport;GO:0051234//establishment of localization;GO:0009987//cellular process;GO:0008150//biological_process
Bra006460	19.6667	67.3333	2.36333	8.13667	1.78361	9.20492e-05	0.00183767	yes	AT5G18450 (E=2e-061) | AP2 domain-containing transcription factor, putative	GO:0043227//membrane-bounded organelle;GO:0043226//organelle;GO:0044424//intracellular part;GO:0005622//intracellular;GO:0043231//intracellular membrane-bounded organelle;GO:0044464//cell part;GO:0043229//intracellular organelle;GO:0005575//cellular_component;GO:0005623//cell;GO:0005634//nucleus	GO:0003700//transcription factor activity, sequence-specific DNA binding;GO:0005488//binding;GO:0003674//molecular_function;GO:0003677//DNA binding;GO:0001071//nucleic acid binding transcription factor activity;GO:0003676//nucleic acid binding;GO:0097159//organic cyclic compound binding;GO:1901363//heterocyclic compound binding	GO:0006807//nitrogen compound metabolic process;GO:0006139//nucleobase-containing compound metabolic process;GO:0044238//primary metabolic process;GO:0006725//cellular aromatic compound metabolic process;GO:0071704//organic substance metabolic process;GO:0008152//metabolic process;GO:0044237//cellular metabolic process;GO:0046483//heterocycle metabolic process;GO:0034641//cellular nitrogen compou…
Bra006508	17.6667	3.33333	0.853333	0.15	-2.50815	0.00170638	0.0206092	yes	AT5G19520 (E=9e-304) MSL9 | MSL9 (MECHANOSENSITIVE CHANNEL OF SMALL CONDUCTANCE-LIKE 9); mechanically-gated ion channel	GO:0005575//cellular_component;GO:0016020//membrane	-	GO:0009987//cellular process;GO:0051179//localization;GO:0051234//establishment of localization;GO:0008150//biological_process;GO:0006810//transport
Bra006522	14	2.66667	2.48333	0.483333	-2.36119	0.000247697	0.00425578	yes	-	-	-	-
Bra006543	170.667	79.3333	24.0067	11.2467	-1.09394	2.7831e-05	0.00065347	yes	AT5G20150 (E=5e-103) ATSPX1, SPX1 | SPX1 (SPX DOMAIN GENE 1)	-	-	GO:0007154//cell communication;GO:0044763//single-organism cellular process;GO:0009991//response to extracellular stimulus;GO:0044699//single-organism process;GO:0009605//response to external stimulus;GO:0009987//cellular process;GO:0008150//biological_process;GO:0006950//response to stress;GO:0050896//response to stimulus
Bra006578	37.9867	14.7967	1.72	0.666667	-1.36737	0.00109467	0.0144949	yes	AT5G20830 (E=0.0) SUS1, ASUS1, atsus1 | SUS1 (SUCROSE SYNTHASE 1); UDP-glycosyltransferase/ sucrose synthase	-	GO:0016740//transferase activity;GO:0003674//molecular_function;GO:0003824//catalytic activity	GO:0071704//organic substance metabolic process;GO:0009987//cellular process;GO:0008152//metabolic process;GO:0008150//biological_process;GO:0044238//primary metabolic process;GO:0009058//biosynthetic process;GO:0005975//carbohydrate metabolic process
Bra006601	26.3333	8	4.07	1.23	-1.72637	0.00025516	0.00435989	yes	-	-	-	-
Bra006641	92.3333	41.3333	11.34	5.13	-1.14439	0.00107106	0.0142186	yes	AT5G22920 (E=2e-169) | zinc finger (C3HC4-type RING finger) family protein	-	GO:0003674//molecular_function;GO:0005515//protein binding;GO:0005488//binding	-
Bra006642	6.33333	0.666667	0.953333	0.113333	-3.07241	0.00395014	0.0403509	yes	-	-	-	-
Bra006669	37	119.667	1.84333	5.95667	1.69219	1.82705e-08	8.70481e-07	yes	AT5G60300 (E=2e-302) | lectin protein kinase family protein	-	GO:0016772//transferase activity, transferring phosphorus-containing groups;GO:0016740//transferase activity;GO:0097159//organic cyclic compound binding;GO:0003824//catalytic activity;GO:0005488//binding;GO:0016301//kinase activity;GO:0000166//nucleotide binding;GO:1901265//nucleoside phosphate binding;GO:0003674//molecular_function;GO:1901363//heterocyclic compound binding;GO:0030246//carbohydra…	GO:0008150//biological_process;GO:0071704//organic substance metabolic process;GO:0008152//metabolic process;GO:0043170//macromolecule metabolic process;GO:0044238//primary metabolic process;GO:0044267//cellular protein metabolic process;GO:0006464//cellular protein modification process;GO:0044237//cellular metabolic process;GO:0044260//cellular macromolecule metabolic process;GO:0009987//cellula…
Bra006721	19.3333	1.66667	6.15333	0.56	-3.45787	2.464e-06	7.60096e-05	yes	AT5G59320 (E=7e-054) LTP3 | LTP3 (LIPID TRANSFER PROTEIN 3); lipid binding	GO:0030312//external encapsulating structure;GO:0005576//extracellular region;GO:0044464//cell part;GO:0005623//cell;GO:0005618//cell wall;GO:0071944//cell periphery;GO:0005575//cellular_component	GO:0003674//molecular_function;GO:0008289//lipid binding;GO:0005488//binding	GO:0050896//response to stimulus;GO:0006810//transport;GO:0051179//localization;GO:0008150//biological_process;GO:0006950//response to stress;GO:0051234//establishment of localization;GO:0009628//response to abiotic stimulus
Bra006743	501.667	110	35.7967	7.46667	-2.26129	9.9145e-06	0.000261891	yes	AT5G58860 (E=2e-282) CYP86A1, CYP86 | CYP86A1 (CYTOCHROME P450 86 A1); fatty acid (omega-1)-hydroxylase/ oxygen binding	GO:0043231//intracellular membrane-bounded organelle;GO:0043229//intracellular organelle;GO:0005623//cell;GO:0005773//vacuole;GO:0005575//cellular_component;GO:0005622//intracellular;GO:0043227//membrane-bounded organelle;GO:0044424//intracellular part;GO:0005737//cytoplasm;GO:0044464//cell part;GO:0044444//cytoplasmic part;GO:0043226//organelle	GO:0003674//molecular_function;GO:0005488//binding;GO:0003824//catalytic activity	GO:0008152//metabolic process;GO:0006810//transport;GO:0044699//single-organism process;GO:0051234//establishment of localization;GO:0009987//cellular process;GO:0009058//biosynthetic process;GO:0071704//organic substance metabolic process;GO:0019748//secondary metabolic process;GO:0044238//primary metabolic process;GO:0008150//biological_process;GO:0006629//lipid metabolic process;GO:0044710//si…
Bra006850	230.333	88.3333	11.42	4.41	-1.37271	0.002908	0.0319202	yes	AT5G56870 (E=0.0) BGAL4 | BGAL4 (beta-galactosidase 4); beta-galactosidase	-	GO:0016787//hydrolase activity;GO:0003674//molecular_function;GO:0003824//catalytic activity	GO:0071704//organic substance metabolic process;GO:0005975//carbohydrate metabolic process;GO:0008152//metabolic process;GO:0008150//biological_process;GO:0044238//primary metabolic process
Bra006851	83.3333	13	7.81667	1.20667	-2.69553	2.76628e-13	2.75422e-11	yes	AT5G56860 (E=2e-127) GNC | GNC (GATA, nitrate-inducible, carbon metabolism-involved); transcription factor	-	GO:0003677//DNA binding;GO:1901363//heterocyclic compound binding;GO:0001071//nucleic acid binding transcription factor activity;GO:0097159//organic cyclic compound binding;GO:0003674//molecular_function;GO:0005488//binding;GO:0003676//nucleic acid binding;GO:0003700//transcription factor activity, sequence-specific DNA binding	GO:0008152//metabolic process;GO:0009058//biosynthetic process;GO:0008150//biological_process;GO:0006139//nucleobase-containing compound metabolic process;GO:0044237//cellular metabolic process;GO:0009987//cellular process;GO:0034641//cellular nitrogen compound metabolic process;GO:0044238//primary metabolic process;GO:1901360//organic cyclic compound metabolic process;GO:0046483//heterocycle met…
Bra006864	53.3333	20.3333	4.05667	1.52	-1.41622	0.000288573	0.00483341	yes	AT5G56630 (E=3e-254) PFK7 | PFK7 (PHOSPHOFRUCTOKINASE 7); 6-phosphofructokinase	GO:0005737//cytoplasm;GO:0005829//cytosol;GO:0044464//cell part;GO:0005575//cellular_component;GO:0005622//intracellular;GO:0005623//cell;GO:0044444//cytoplasmic part;GO:0044424//intracellular part	GO:0097159//organic cyclic compound binding;GO:0016772//transferase activity, transferring phosphorus-containing groups;GO:0036094//small molecule binding;GO:0000166//nucleotide binding;GO:1901363//heterocyclic compound binding;GO:0016740//transferase activity;GO:0003674//molecular_function;GO:1901265//nucleoside phosphate binding;GO:0003824//catalytic activity;GO:0016301//kinase activity;GO:0005…	GO:1901360//organic cyclic compound metabolic process;GO:0009056//catabolic process;GO:0008152//metabolic process;GO:0044237//cellular metabolic process;GO:0006139//nucleobase-containing compound metabolic process;GO:0008150//biological_process;GO:0071704//organic substance metabolic process;GO:0034641//cellular nitrogen compound metabolic process;GO:0044238//primary metabolic process;GO:0006091/…
Bra006870	81.6667	33	13.84	5.52333	-1.32523	7.92467e-05	0.00161713	yes	AT3G51730 (E=7e-088) | saposin B domain-containing protein	-	-	GO:0044710//single-organism metabolic process;GO:0008152//metabolic process;GO:0044238//primary metabolic process;GO:0008150//biological_process;GO:0006629//lipid metabolic process;GO:0071704//organic substance metabolic process;GO:0044699//single-organism process
Bra006951	495.333	81	39.5633	6.74	-2.55334	1.48971e-19	2.72214e-17	yes	AT3G52820 (E=3e-228) ATPAP22, PAP22 | PAP22 (PURPLE ACID PHOSPHATASE 22); acid phosphatase/ protein serine/threonine phosphatase	-	GO:0016787//hydrolase activity;GO:0003824//catalytic activity;GO:0005488//binding;GO:0003674//molecular_function	GO:0006725//cellular aromatic compound metabolic process;GO:0050896//response to stimulus;GO:0009058//biosynthetic process;GO:0034641//cellular nitrogen compound metabolic process;GO:0044710//single-organism metabolic process;GO:0006950//response to stress;GO:0009991//response to extracellular stimulus;GO:0008152//metabolic process;GO:0008150//biological_process;GO:0006807//nitrogen compound meta…
Bra006976	34.6667	5	2.81	0.423333	-2.7307	4.33615e-05	0.000958705	yes	AT3G53190 (E=7e-231) | pectate lyase family protein	-	GO:0003674//molecular_function;GO:0003824//catalytic activity;GO:0005488//binding	GO:0008152//metabolic process;GO:0044238//primary metabolic process;GO:0009056//catabolic process;GO:0008150//biological_process;GO:0071704//organic substance metabolic process;GO:0005975//carbohydrate metabolic process
Bra006997	47	5.66667	5.73667	0.696667	-3.04167	1.03093e-06	3.4734e-05	yes	AT3G53420 (E=1e-147) PIP2A, PIP2, PIP2;1 | PIP2A (PLASMA MEMBRANE INTRINSIC PROTEIN 2A); water channel	GO:0005575//cellular_component;GO:0009536//plastid;GO:0044444//cytoplasmic part;GO:0005737//cytoplasm;GO:0016020//membrane;GO:0044464//cell part;GO:0043226//organelle;GO:0005623//cell;GO:0043229//intracellular organelle;GO:0005622//intracellular;GO:0044424//intracellular part;GO:0005886//plasma membrane;GO:0071944//cell periphery;GO:0005773//vacuole;GO:0043227//membrane-bounded organelle;GO:00432…	GO:0005515//protein binding;GO:0005215//transporter activity;GO:0003674//molecular_function;GO:0005488//binding	GO:0009987//cellular process;GO:0008150//biological_process;GO:0046483//heterocycle metabolic process;GO:0007275//multicellular organism development;GO:0032502//developmental process;GO:0044707//single-multicellular organism process;GO:0044238//primary metabolic process;GO:0009628//response to abiotic stimulus;GO:0006810//transport;GO:0040007//growth;GO:0044763//single-organism cellular process;G…
Bra007008	2.66667	13	0.393333	1.83333	2.22064	0.00133592	0.0169939	yes	AT3G53530 (E=6e-093) | heavy-metal-associated domain-containing protein	-	GO:0003674//molecular_function;GO:0005488//binding	GO:0051179//localization;GO:0006810//transport;GO:0008150//biological_process;GO:0051234//establishment of localization
Bra007035	63	133.333	3.92	8.42	1.10297	5.81108e-05	0.00123895	yes	AT3G53960 (E=3e-281) | proton-dependent oligopeptide transport (POT) family protein	GO:0016020//membrane;GO:0005575//cellular_component	GO:0003674//molecular_function;GO:0005215//transporter activity	GO:0006810//transport;GO:0051234//establishment of localization;GO:0051179//localization;GO:0008150//biological_process
Bra007038	315	132.333	72.42	30.4267	-1.25105	7.05607e-07	2.49647e-05	yes	AT3G53990 (E=2e-075) | universal stress protein (USP) family protein	-	-	GO:0050896//response to stimulus;GO:0008150//biological_process;GO:0006950//response to stress
Bra007051	15	3.66667	1.74333	0.453333	-1.9432	0.00351335	0.0370212	yes	AT3G54150 (E=8e-151) | embryo-abundant protein-related	-	GO:0003674//molecular_function;GO:0016740//transferase activity;GO:0003824//catalytic activity	GO:0008152//metabolic process;GO:0008150//biological_process
Bra007070	211	72.6667	18.3433	6.10667	-1.5868	9.5369e-06	0.000254077	yes	AT3G54400 (E=2e-204) | aspartyl protease family protein	-	GO:0016787//hydrolase activity;GO:0003674//molecular_function;GO:0003824//catalytic activity	GO:0008152//metabolic process;GO:0071704//organic substance metabolic process;GO:0008150//biological_process;GO:0043170//macromolecule metabolic process;GO:0044238//primary metabolic process;GO:0019538//protein metabolic process
Bra007091	44	16.3333	2.27	0.843333	-1.42852	0.000225005	0.00391792	yes	AT3G54720 (E=0.0) AMP1, COP2, HPT, PT | AMP1 (ALTERED MERISTEM PROGRAM 1); carboxypeptidase/ dipeptidase	-	GO:0003674//molecular_function;GO:0016787//hydrolase activity;GO:0003824//catalytic activity	GO:0043170//macromolecule metabolic process;GO:0044238//primary metabolic process;GO:0071704//organic substance metabolic process;GO:0019538//protein metabolic process;GO:0008152//metabolic process;GO:0008150//biological_process
Bra007145	6	0.333333	0.753333	0.04	-4.23522	0.00456205	0.0451755	yes	AT3G55120 (E=1e-043) TT5, A11, CFI | TT5 (TRANSPARENT TESTA 5); chalcone isomerase	-	GO:0003674//molecular_function;GO:0003824//catalytic activity	GO:0008152//metabolic process;GO:0009058//biosynthetic process;GO:0008150//biological_process
Bra007149	39.6667	8.66667	15.4433	3.28333	-2.23375	5.61066e-05	0.00120141	yes	-	-	-	-
Bra007184	10	33	0.836667	2.64333	1.65963	0.000580042	0.00862538	yes	AT3G55700 (E=9e-205) | UDP-glucoronosyl/UDP-glucosyl transferase family protein	-	GO:0003674//molecular_function;GO:0003824//catalytic activity;GO:0016740//transferase activity	GO:0008152//metabolic process;GO:0008150//biological_process
Bra007192	244.667	96.3333	22.3233	8.83	-1.33807	1.68386e-08	8.16031e-07	yes	AT3G55800 (E=1e-202) SBPASE | SBPASE (sedoheptulose-bisphosphatase); phosphoric ester hydrolase/ sedoheptulose-bisphosphatase	-	GO:0003674//molecular_function;GO:0003824//catalytic activity;GO:0016787//hydrolase activity	GO:0008150//biological_process;GO:0005975//carbohydrate metabolic process;GO:0044238//primary metabolic process;GO:0008152//metabolic process;GO:0071704//organic substance metabolic process
Bra007212	8	0	0.533333	0.001	-9.05889	0.000159366	0.0029224	yes	AT3G56060 (E=1e-240) | glucose-methanol-choline (GMC) oxidoreductase family protein	-	GO:0000166//nucleotide binding;GO:0003824//catalytic activity;GO:0003674//molecular_function;GO:1901265//nucleoside phosphate binding;GO:0036094//small molecule binding;GO:1901363//heterocyclic compound binding;GO:0005488//binding;GO:0097159//organic cyclic compound binding	GO:0008150//biological_process;GO:0008152//metabolic process
Bra007225	26.6667	7	2.22333	0.59	-1.91394	0.000205522	0.00361718	yes	AT3G56200 (E=9e-212) | amino acid transporter family protein	GO:0005575//cellular_component;GO:0016020//membrane	-	-
Bra007230	10.3333	1.33333	3.40667	0.44	-2.95279	0.000583453	0.00866366	yes	AT3G56240 (E=5e-047) CCH | CCH (COPPER CHAPERONE); copper chaperone	-	GO:0005488//binding;GO:0003674//molecular_function	GO:0051234//establishment of localization;GO:0006810//transport;GO:0008150//biological_process;GO:0051179//localization
Bra007253	53.6667	25	6.25333	2.91	-1.10361	0.00080105	0.0112812	yes	AT3G56580 (E=9e-120) | zinc finger (C3HC4-type RING finger) family protein	-	GO:0005488//binding;GO:0005515//protein binding;GO:0003674//molecular_function	-
Bra007255	258.333	61.3333	9.35667	2.16333	-2.11274	1.33114e-13	1.36923e-11	yes	AT3G56600 (E=5e-197) | inositol or phosphatidylinositol kinase/ phosphotransferase, alcohol group as acceptor	-	GO:0016772//transferase activity, transferring phosphorus-containing groups;GO:0016740//transferase activity;GO:0016301//kinase activity;GO:0003824//catalytic activity;GO:0003674//molecular_function	GO:0008152//metabolic process;GO:0009987//cellular process;GO:0008150//biological_process
Bra007264	8	30.3333	0.643333	2.31333	1.84633	0.000622729	0.00915064	yes	AT3G56700 (E=3e-070) FAR6 | FAR6 (FATTY ACID REDUCTASE 6); fatty acyl-CoA reductase (alcohol-forming)/ oxidoreductase, acting on the CH-CH group of donors, NAD or NADP as acceptor	-	GO:0003674//molecular_function;GO:0003824//catalytic activity	-
Bra007354	0.333333	39.6667	0.0266667	3.34333	6.97011	2.60414e-18	4.1273e-16	yes	-	-	-	-
Bra007369	4.33333	0	1	0.001	-9.96578	0.00186477	0.0221604	yes	-	-	-	-
Bra007375	56.3333	22.6667	4.2	1.68667	-1.31621	6.18321e-05	0.00130837	yes	-	-	-	-
Bra007415	133.667	52.3333	18.4533	7.34333	-1.32937	6.49031e-06	0.000179383	yes	AT3G58730 (E=7e-136) | vacuolar ATP synthase subunit D (VATD) / V-ATPase D subunit / vacuolar proton pump D subunit (VATPD)	-	GO:0005215//transporter activity;GO:0003824//catalytic activity;GO:0003674//molecular_function;GO:0016787//hydrolase activity	-
Bra007416	19.3333	0	1.55333	0.001	-10.6012	4.28466e-11	3.154e-09	yes	AT3G58750 (E=2e-133) CSY2 | CSY2 (citrate synthase 2); citrate (SI)-synthase	-	GO:0016740//transferase activity;GO:0003674//molecular_function;GO:0003824//catalytic activity	GO:0008152//metabolic process;GO:0009987//cellular process;GO:0006091//generation of precursor metabolites and energy;GO:0044237//cellular metabolic process;GO:0008150//biological_process;GO:0071704//organic substance metabolic process;GO:0005975//carbohydrate metabolic process;GO:0044238//primary metabolic process
Bra007446	36.6667	14.6667	5.28	2.05	-1.36491	0.00204545	0.0239592	yes	-	-	-	-
Bra007482	94.3333	47.3333	9.64333	4.76	-1.01857	0.000411209	0.00651061	yes	AT3G59845 (E=2e-151) | NADP-dependent oxidoreductase, putative	-	GO:0003674//molecular_function;GO:0003824//catalytic activity;GO:0005488//binding	GO:0008152//metabolic process;GO:0008150//biological_process
Bra007494	612	250.667	52.5833	21.64	-1.28091	7.81654e-08	3.31712e-06	yes	AT3G59940 (E=1e-165) | kelch repeat-containing F-box family protein	GO:0005622//intracellular;GO:0044444//cytoplasmic part;GO:0005575//cellular_component;GO:0005829//cytosol;GO:0005623//cell;GO:0044464//cell part;GO:0005737//cytoplasm;GO:0044424//intracellular part	GO:0005515//protein binding;GO:0003674//molecular_function;GO:0005488//binding	GO:0023052//signaling;GO:0009719//response to endogenous stimulus;GO:0050896//response to stimulus;GO:0007165//signal transduction;GO:0019748//secondary metabolic process;GO:0007154//cell communication;GO:0044763//single-organism cellular process;GO:0044700//single organism signaling;GO:0050794//regulation of cellular process;GO:0009987//cellular process;GO:0044710//single-organism metabolic proc…
Bra007503	15.3333	3	1.05333	0.19	-2.47089	0.000165609	0.00302616	yes	AT3G49130 (E=6e-014) | RNA binding	-	GO:0097159//organic cyclic compound binding;GO:0003676//nucleic acid binding;GO:0003674//molecular_function;GO:1901363//heterocyclic compound binding;GO:0005488//binding;GO:0003723//RNA binding	GO:0044237//cellular metabolic process;GO:1901360//organic cyclic compound metabolic process;GO:0008150//biological_process;GO:0008152//metabolic process;GO:0006725//cellular aromatic compound metabolic process;GO:0046483//heterocycle metabolic process;GO:0009987//cellular process;GO:0044238//primary metabolic process;GO:0071704//organic substance metabolic process;GO:0006807//nitrogen compound m…
Bra007508	50.6667	15.3333	3.65	1.06667	-1.77479	2.04109e-05	0.00050401	yes	AT3G60130 (E=5e-266) BGLU16 | BGLU16 (BETA GLUCOSIDASE 16); catalytic/ cation binding / hydrolase, hydrolyzing O-glycosyl compounds	-	GO:0003824//catalytic activity;GO:0016787//hydrolase activity;GO:0003674//molecular_function	GO:0071704//organic substance metabolic process;GO:0044238//primary metabolic process;GO:0005975//carbohydrate metabolic process;GO:0008152//metabolic process;GO:0008150//biological_process
Bra007510	52.6667	4.66667	3.36667	0.32	-3.39518	0.000136835	0.00257392	yes	AT3G60140 (E=1e-286) DIN2, SRG2, BGLU30 | DIN2 (DARK INDUCIBLE 2); catalytic/ cation binding / hydrolase, hydrolyzing O-glycosyl compounds	-	GO:0003674//molecular_function;GO:0003824//catalytic activity;GO:0016787//hydrolase activity	GO:0008152//metabolic process;GO:0008150//biological_process;GO:0005975//carbohydrate metabolic process;GO:0071704//organic substance metabolic process;GO:0044238//primary metabolic process
Bra007513	759	338.667	44.0033	19.21	-1.19576	2.21772e-07	8.66557e-06	yes	AT3G60190 (E=0.0) ADL4, ADLP2, EDR3, DRP1E, ADL1E | ADL1E (ARABIDOPSIS DYNAMIN-LIKE 1E); GTP binding / GTPase	-	GO:0016787//hydrolase activity;GO:0005488//binding;GO:1901363//heterocyclic compound binding;GO:0003824//catalytic activity;GO:0097159//organic cyclic compound binding;GO:0000166//nucleotide binding;GO:0036094//small molecule binding;GO:0003674//molecular_function;GO:1901265//nucleoside phosphate binding	-
Bra007515	24.6667	0	2.85333	0.001	-11.4784	4.3856e-14	4.93603e-12	yes	AT3G60220 (E=7e-101) ATL4 | ATL4; protein binding / zinc ion binding	-	GO:0005515//protein binding;GO:0003674//molecular_function;GO:0005488//binding	-
Bra007525	28.6667	67.3333	5.03	11.4967	1.19259	0.00024664	0.00423997	yes	AT3G61090 (E=4e-027) | unknown protein	GO:0005622//intracellular;GO:0043227//membrane-bounded organelle;GO:0043231//intracellular membrane-bounded organelle;GO:0005575//cellular_component;GO:0005737//cytoplasm;GO:0044424//intracellular part;GO:0044444//cytoplasmic part;GO:0043229//intracellular organelle;GO:0005777//peroxisome;GO:0044464//cell part;GO:0042579//microbody;GO:0043226//organelle;GO:0005623//cell	-	GO:0008150//biological_process;GO:0008152//metabolic process
Bra007526	8	0	1.06333	0.001	-10.0544	4.41695e-06	0.000126927	yes	AT3G61090 (E=8e-029) | unknown protein	GO:0005737//cytoplasm;GO:0005623//cell;GO:0043227//membrane-bounded organelle;GO:0005622//intracellular;GO:0043229//intracellular organelle;GO:0042579//microbody;GO:0043226//organelle;GO:0044424//intracellular part;GO:0005575//cellular_component;GO:0044464//cell part;GO:0043231//intracellular membrane-bounded organelle;GO:0044444//cytoplasmic part;GO:0005777//peroxisome	-	GO:0008152//metabolic process;GO:0008150//biological_process
Bra007550	31.3333	2	4.76667	0.283333	-4.07241	6.77364e-08	2.9063e-06	yes	-	-	-	-
Bra007554	4725.67	11448	327.97	793.777	1.27517	1.27218e-11	1.01331e-09	yes	AT3G60730 (E=5e-260) | pectinesterase family protein	GO:0005618//cell wall;GO:0071944//cell periphery;GO:0044464//cell part;GO:0005575//cellular_component;GO:0005623//cell;GO:0030312//external encapsulating structure	GO:0098772//molecular function regulator;GO:0016787//hydrolase activity;GO:0003674//molecular_function;GO:0003824//catalytic activity;GO:0030234//enzyme regulator activity	GO:0009987//cellular process;GO:0008150//biological_process;GO:0071704//organic substance metabolic process;GO:0016043//cellular component organization;GO:0071840//cellular component organization or biogenesis;GO:0044238//primary metabolic process;GO:0005975//carbohydrate metabolic process;GO:0009056//catabolic process;GO:0008152//metabolic process
Bra007555	771.667	1755.33	37.9333	86.7567	1.19351	4.00728e-08	1.78597e-06	yes	AT3G60750 (E=0.0) | transketolase, putative	-	GO:0003824//catalytic activity;GO:0016740//transferase activity;GO:0003674//molecular_function	GO:0008150//biological_process;GO:0008152//metabolic process
Bra007581	30.3333	3	5.70333	0.606667	-3.23283	6.36967e-06	0.000176352	yes	AT3G61190 (E=2e-047) BAP1 | BAP1 (BON ASSOCIATION PROTEIN 1); phospholipid binding / protein binding	-	GO:0003674//molecular_function;GO:0005515//protein binding;GO:0005488//binding	-
Bra007589	53	14	9.81333	2.37	-2.04986	0.000143693	0.0026809	yes	AT3G61260 (E=2e-057) | DNA-binding family protein / remorin family protein	GO:0005886//plasma membrane;GO:0043231//intracellular membrane-bounded organelle;GO:0043227//membrane-bounded organelle;GO:0071944//cell periphery;GO:0044444//cytoplasmic part;GO:0044464//cell part;GO:0005737//cytoplasm;GO:0005622//intracellular;GO:0016020//membrane;GO:0043226//organelle;GO:0005773//vacuole;GO:0005623//cell;GO:0043229//intracellular organelle;GO:0005575//cellular_component;GO:004…	-	-
Bra007609	86.3333	13	6.87	1.03	-2.73767	4.59075e-05	0.00100925	yes	AT3G61490 (E=1e-251) | glycoside hydrolase family 28 protein / polygalacturonase (pectinase) family protein	GO:0005576//extracellular region;GO:0005575//cellular_component	GO:0016787//hydrolase activity;GO:0003824//catalytic activity;GO:0003674//molecular_function	GO:0071840//cellular component organization or biogenesis;GO:0071704//organic substance metabolic process;GO:0016043//cellular component organization;GO:0008152//metabolic process;GO:0005975//carbohydrate metabolic process;GO:0044238//primary metabolic process;GO:0009987//cellular process;GO:0008150//biological_process
Bra007616	43.6667	112.667	3.95667	9.99333	1.33668	2.48388e-05	0.000596284	yes	AT3G61590 (E=6e-184) HWS, HS | HWS (HAWAIIAN SKIRT); ubiquitin-protein ligase	GO:0005622//intracellular;GO:0044464//cell part;GO:0005623//cell;GO:0005575//cellular_component	GO:0005488//binding;GO:0003674//molecular_function;GO:0005515//protein binding	GO:0044699//single-organism process;GO:0008152//metabolic process;GO:0050896//response to stimulus;GO:0044238//primary metabolic process;GO:0043170//macromolecule metabolic process;GO:0044763//single-organism cellular process;GO:0019538//protein metabolic process;GO:0006950//response to stress;GO:0008150//biological_process;GO:0071704//organic substance metabolic process;GO:0007049//cell cycle;GO…
Bra007636	4488.27	1276.64	300.137	87.0367	-1.78592	5.08398e-12	4.22269e-10	yes	AT3G61880 (E=6e-270) CYP78A9 | CYP78A9 (CYTOCHROME P450 78A9); monooxygenase/ oxygen binding	-	GO:0003674//molecular_function;GO:0003824//catalytic activity;GO:0005488//binding	GO:0008150//biological_process;GO:0008152//metabolic process
Bra007637	8.33333	0.333333	1.30333	0.0433333	-4.91059	2.69475e-05	0.00063561	yes	AT3G61890 (E=1e-090) ATHB-12, ATHB12 | ATHB-12 (ARABIDOPSIS THALIANA HOMEOBOX 12); transcription activator/ transcription factor	GO:0005622//intracellular;GO:0043226//organelle;GO:0044424//intracellular part;GO:0043231//intracellular membrane-bounded organelle;GO:0005623//cell;GO:0005634//nucleus;GO:0043229//intracellular organelle;GO:0044464//cell part;GO:0043227//membrane-bounded organelle;GO:0005575//cellular_component	GO:0001071//nucleic acid binding transcription factor activity;GO:0003677//DNA binding;GO:0003700//transcription factor activity, sequence-specific DNA binding;GO:0003676//nucleic acid binding;GO:1901363//heterocyclic compound binding;GO:0003674//molecular_function;GO:0097159//organic cyclic compound binding;GO:0005488//binding	GO:0071704//organic substance metabolic process;GO:0009987//cellular process;GO:0006725//cellular aromatic compound metabolic process;GO:0044237//cellular metabolic process;GO:0008150//biological_process;GO:0044238//primary metabolic process;GO:1901360//organic cyclic compound metabolic process;GO:0009058//biosynthetic process;GO:0046483//heterocycle metabolic process;GO:0008152//metabolic proces…
Bra007645	120.667	53	7.39	3.14667	-1.23175	4.29224e-05	0.000949673	yes	AT3G61960 (E=6e-255) | protein kinase family protein	-	GO:0097159//organic cyclic compound binding;GO:0000166//nucleotide binding;GO:0016301//kinase activity;GO:0003824//catalytic activity;GO:1901265//nucleoside phosphate binding;GO:0016740//transferase activity;GO:0016772//transferase activity, transferring phosphorus-containing groups;GO:0036094//small molecule binding;GO:0003674//molecular_function;GO:0005488//binding;GO:1901363//heterocyclic comp…	GO:0043412//macromolecule modification;GO:0071704//organic substance metabolic process;GO:0019538//protein metabolic process;GO:0009987//cellular process;GO:0044267//cellular protein metabolic process;GO:0036211//protein modification process;GO:0044237//cellular metabolic process;GO:0043170//macromolecule metabolic process;GO:0008152//metabolic process;GO:0044260//cellular macromolecule metabolic…
Bra007648	0	46	0.001	5.73667	12.486	4.89949e-21	1.03536e-18	yes	-	-	-	-
Bra007654	26	7.33333	5.73667	1.68	-1.77175	0.000684374	0.00989269	yes	AT3G62050 (E=2e-025) | FUNCTIONS IN: molecular_function unknown; INVOLVED IN: biological_process unknown; LOCATED IN: cellular_component unknown; EXPRESSED IN: 10 plant structures; EXPRESSED DURING: 6 growth stages; CONTAINS InterPro DOMAIN/s: Protein of unknown function DUF537 (InterPro:IPR007491); BEST Arabidopsis thaliana protein match is: EDA32 (embryo sac development arrest 32) (TAIR:AT3G622…	GO:0005622//intracellular;GO:0044444//cytoplasmic part;GO:0043231//intracellular membrane-bounded organelle;GO:0005777//peroxisome;GO:0044464//cell part;GO:0044424//intracellular part;GO:0043227//membrane-bounded organelle;GO:0043226//organelle;GO:0043229//intracellular organelle;GO:0005737//cytoplasm;GO:0042579//microbody;GO:0005623//cell;GO:0005575//cellular_component	-	GO:0008150//biological_process;GO:0008152//metabolic process
Bra007655	32	4.66667	4.69667	0.683333	-2.78098	8.81212e-05	0.00177178	yes	AT3G62030 (E=1e-114) ROC4 | peptidyl-prolyl cis-trans isomerase, chloroplast / cyclophilin / rotamase / cyclosporin A-binding protein (ROC4)	-	GO:0003674//molecular_function;GO:0003824//catalytic activity	GO:0043412//macromolecule modification;GO:0019538//protein metabolic process;GO:0008152//metabolic process;GO:0036211//protein modification process;GO:0044267//cellular protein metabolic process;GO:0009987//cellular process;GO:0008150//biological_process;GO:0044238//primary metabolic process;GO:0044260//cellular macromolecule metabolic process;GO:0043170//macromolecule metabolic process;GO:007170…
Bra007656	21.3333	149.667	3.32333	23.1033	2.7974	6.11718e-16	8.19069e-14	yes	AT3G62040 (E=3e-110) | catalytic/ hydrolase	-	GO:0003674//molecular_function;GO:0003824//catalytic activity;GO:0016787//hydrolase activity	GO:0051234//establishment of localization;GO:0006810//transport;GO:0051179//localization;GO:0008150//biological_process;GO:0008152//metabolic process
Bra007697	438	190.667	50.5767	22.3067	-1.181	3.19832e-06	9.5348e-05	yes	-	-	-	-
Bra007698	28	10.3333	2.02	0.72	-1.48829	0.00411741	0.041703	yes	AT4G27830 (E=1e-237) BGLU10 | BGLU10 (BETA GLUCOSIDASE 10); catalytic/ cation binding / hydrolase, hydrolyzing O-glycosyl compounds	-	GO:0003674//molecular_function;GO:0016787//hydrolase activity;GO:0003824//catalytic activity	GO:0005975//carbohydrate metabolic process;GO:0071704//organic substance metabolic process;GO:0008150//biological_process;GO:0008152//metabolic process;GO:0044238//primary metabolic process
Bra007704	0.333333	7.66667	0.0633333	1.45667	4.52356	0.000100163	0.00197302	yes	AT3G62820 (E=1e-065) | invertase/pectin methylesterase inhibitor family protein	-	GO:0003824//catalytic activity;GO:0003674//molecular_function;GO:0016787//hydrolase activity;GO:0030234//enzyme regulator activity;GO:0098772//molecular function regulator	GO:0008150//biological_process
Bra007709	440.333	206.667	12.2933	5.76667	-1.09207	5.87794e-08	2.55374e-06	yes	AT3G62900 (E=0.0) | zinc ion binding	-	GO:0005488//binding;GO:0003674//molecular_function	-
Bra007721	8.66667	0.333333	2.30333	0.0766667	-4.90898	0.000425507	0.00667572	yes	-	-	-	-
Bra007743	1.66667	48.3333	0.136667	3.85667	4.81862	2.2233e-17	3.30453e-15	yes	AT3G63440 (E=4e-221) ATCKX6, CKX6, ATCKX7 | CKX6 (CYTOKININ OXIDASE/DEHYDROGENASE 6); cytokinin dehydrogenase	-	GO:0000166//nucleotide binding;GO:0003674//molecular_function;GO:0005488//binding;GO:0036094//small molecule binding;GO:0097159//organic cyclic compound binding;GO:0003824//catalytic activity;GO:1901265//nucleoside phosphate binding;GO:1901363//heterocyclic compound binding	GO:0008152//metabolic process;GO:0044699//single-organism process;GO:0009653//anatomical structure morphogenesis;GO:0032501//multicellular organismal process;GO:0044767//single-organism developmental process;GO:0009987//cellular process;GO:0048856//anatomical structure development;GO:0008150//biological_process;GO:0032502//developmental process;GO:0009791//post-embryonic development;GO:0007275//m…
Bra007756	11	0.666667	0.326667	0.0166667	-4.29278	3.2834e-05	0.000752734	yes	AT2G26420 (E=0.0) PIP5K3 | PIP5K3 (1-PHOSPHATIDYLINOSITOL-4-PHOSPHATE 5-KINASE 3); 1-phosphatidylinositol-4-phosphate 5-kinase	GO:0005575//cellular_component;GO:0005623//cell;GO:0044464//cell part;GO:0016020//membrane;GO:0005622//intracellular;GO:0005737//cytoplasm;GO:0071944//cell periphery;GO:0005886//plasma membrane;GO:0044424//intracellular part	GO:0016740//transferase activity;GO:0005515//protein binding;GO:0005488//binding;GO:0003674//molecular_function;GO:0003824//catalytic activity;GO:0016301//kinase activity;GO:0016772//transferase activity, transferring phosphorus-containing groups	GO:0009987//cellular process;GO:0071840//cellular component organization or biogenesis;GO:0030154//cell differentiation;GO:0044699//single-organism process;GO:0032502//developmental process;GO:0048869//cellular developmental process;GO:0007275//multicellular organism development;GO:0044767//single-organism developmental process;GO:0006629//lipid metabolic process;GO:0040007//growth;GO:0044763//si…
Bra007775	2013	695	151.287	52.05	-1.53931	1.74241e-09	1.02706e-07	yes	AT2G25940 (E=1e-237) ALPHA-VPE, ALPHAVPE | ALPHA-VPE (alpha-vacuolar processing enzyme); cysteine-type endopeptidase	-	GO:0016787//hydrolase activity;GO:0003674//molecular_function;GO:0003824//catalytic activity	GO:0071704//organic substance metabolic process;GO:0009987//cellular process;GO:0008150//biological_process;GO:0044238//primary metabolic process;GO:0008152//metabolic process;GO:0043170//macromolecule metabolic process;GO:0019538//protein metabolic process
Bra007777	8	28.3333	1.66333	6.12333	1.88024	0.000271823	0.00460159	yes	-	-	-	-
Bra007780	77.6667	23.6667	9.62667	2.87667	-1.74264	6.66346e-06	0.000183505	yes	-	-	-	-
Bra007792	20.3333	43	1.43333	2.99	1.06077	0.0030608	0.0333032	yes	AT1G11280 (E=7e-243) | S-locus protein kinase, putative	-	GO:1901265//nucleoside phosphate binding;GO:0097159//organic cyclic compound binding;GO:0005488//binding;GO:0016740//transferase activity;GO:0003674//molecular_function;GO:0036094//small molecule binding;GO:0000166//nucleotide binding;GO:0003824//catalytic activity;GO:0016772//transferase activity, transferring phosphorus-containing groups;GO:0016301//kinase activity;GO:1901363//heterocyclic comp…	GO:0043412//macromolecule modification;GO:0044238//primary metabolic process;GO:0036211//protein modification process;GO:0071704//organic substance metabolic process;GO:0019538//protein metabolic process;GO:0044237//cellular metabolic process;GO:0043170//macromolecule metabolic process;GO:0044260//cellular macromolecule metabolic process;GO:0008150//biological_process;GO:0006464//cellular protein…
Bra007840	117.667	50.3333	5.02333	2.11667	-1.24685	2.59782e-05	0.000618381	yes	AT2G24650 (E=5e-086) | DNA binding / transcription factor	GO:0043229//intracellular organelle;GO:0043231//intracellular membrane-bounded organelle;GO:0005623//cell;GO:0043227//membrane-bounded organelle;GO:0005575//cellular_component;GO:0043226//organelle;GO:0044424//intracellular part;GO:0005634//nucleus;GO:0005622//intracellular;GO:0044464//cell part	GO:1901363//heterocyclic compound binding;GO:0097159//organic cyclic compound binding;GO:0000166//nucleotide binding;GO:0003677//DNA binding;GO:0003676//nucleic acid binding;GO:0003674//molecular_function;GO:0036094//small molecule binding;GO:0005488//binding;GO:1901265//nucleoside phosphate binding	GO:0034641//cellular nitrogen compound metabolic process;GO:0006139//nucleobase-containing compound metabolic process;GO:0006807//nitrogen compound metabolic process;GO:0044237//cellular metabolic process;GO:0008152//metabolic process;GO:0046483//heterocycle metabolic process;GO:0009987//cellular process;GO:0044238//primary metabolic process;GO:0071704//organic substance metabolic process;GO:1901…
Bra007862	228	93.6667	16.97	6.96	-1.28583	3.58794e-05	0.000811768	yes	AT2G24270 (E=4e-272) ALDH11A3 | ALDH11A3; 3-chloroallyl aldehyde dehydrogenase/ glyceraldehyde-3-phosphate dehydrogenase (NADP+)	-	GO:0003674//molecular_function;GO:0003824//catalytic activity	GO:0008152//metabolic process;GO:0008150//biological_process
Bra007885	119	49.6667	15.25	6.57	-1.21484	0.00257422	0.0289207	yes	AT1G69840 (E=1e-142) | band 7 family protein	GO:0005575//cellular_component;GO:0016020//membrane	-	-
Bra007917	53	22.62	12.8233	5.61333	-1.19184	0.00387699	0.0398063	yes	AT1G70490 (E=5e-074) ATARFA1D, ARFA1D | ARFA1D; GTP binding / phospholipase activator/ protein binding	GO:0044464//cell part;GO:0005623//cell;GO:0005575//cellular_component;GO:0005622//intracellular	GO:1901363//heterocyclic compound binding;GO:0000166//nucleotide binding;GO:0003674//molecular_function;GO:0036094//small molecule binding;GO:0097159//organic cyclic compound binding;GO:0005488//binding;GO:1901265//nucleoside phosphate binding	GO:0050789//regulation of biological process;GO:0044700//single organism signaling;GO:0051716//cellular response to stimulus;GO:0023052//signaling;GO:0007154//cell communication;GO:0050794//regulation of cellular process;GO:0007165//signal transduction;GO:0065007//biological regulation;GO:0044763//single-organism cellular process;GO:0009987//cellular process;GO:0008150//biological_process;GO:0044…
Bra007945	69	15	11.1167	2.63	-2.07959	0.00416956	0.0420803	yes	AT1G70850 (E=2e-074) MLP34 | MLP34 (MLP-LIKE PROTEIN 34)	-	-	GO:0006950//response to stress;GO:0009607//response to biotic stimulus;GO:0050896//response to stimulus;GO:0008150//biological_process
Bra007973	132.667	330.333	7.50333	18.6933	1.31692	3.90438e-08	1.74512e-06	yes	AT1G71530 (E=4e-216) | protein kinase family protein	-	GO:0005488//binding;GO:0003824//catalytic activity;GO:0016772//transferase activity, transferring phosphorus-containing groups;GO:0097159//organic cyclic compound binding;GO:0016740//transferase activity;GO:0036094//small molecule binding;GO:0003674//molecular_function;GO:0016301//kinase activity;GO:1901265//nucleoside phosphate binding;GO:0000166//nucleotide binding;GO:1901363//heterocyclic comp…	GO:0044238//primary metabolic process;GO:0071704//organic substance metabolic process;GO:0043170//macromolecule metabolic process;GO:0008150//biological_process;GO:0008152//metabolic process;GO:0019538//protein metabolic process;GO:0036211//protein modification process;GO:0044260//cellular macromolecule metabolic process;GO:0006464//cellular protein modification process;GO:0043412//macromolecule …
Bra008037	271	101.333	10.5433	4.05667	-1.37796	0.000403893	0.00641438	yes	AT1G72520 (E=0.0) | lipoxygenase, putative	-	GO:0005515//protein binding;GO:0005488//binding;GO:0003824//catalytic activity;GO:0003674//molecular_function	GO:0090567//reproductive shoot system development;GO:0061458//reproductive system development;GO:0023052//signaling;GO:0009719//response to endogenous stimulus;GO:0007154//cell communication;GO:0008150//biological_process;GO:0007165//signal transduction;GO:0044707//single-multicellular organism process;GO:0044238//primary metabolic process;GO:0044699//single-organism process;GO:0007275//multicell…
Bra008038	68.6667	18.6667	5.65667	1.51667	-1.89905	1.96943e-06	6.21102e-05	yes	AT1G72540 (E=3e-186) | protein kinase, putative	-	GO:0097159//organic cyclic compound binding;GO:1901363//heterocyclic compound binding;GO:0016740//transferase activity;GO:0016772//transferase activity, transferring phosphorus-containing groups;GO:0005488//binding;GO:0003674//molecular_function;GO:1901265//nucleoside phosphate binding;GO:0003824//catalytic activity;GO:0000166//nucleotide binding;GO:0016301//kinase activity;GO:0036094//small mole…	GO:0008150//biological_process;GO:0036211//protein modification process;GO:0043170//macromolecule metabolic process;GO:0044237//cellular metabolic process;GO:0006464//cellular protein modification process;GO:0019538//protein metabolic process;GO:0044260//cellular macromolecule metabolic process;GO:0043412//macromolecule modification;GO:0008152//metabolic process;GO:0044238//primary metabolic proc…
Bra008043	1276	2716.33	99.5667	210.1	1.07734	7.57499e-09	4.00868e-07	yes	AT1G72710 (E=5e-233) CKL2 | CKL2 (CASEIN KINASE 1-LIKE PROTEIN 2); ATP binding / kinase/ protein kinase/ protein serine/threonine kinase	-	GO:0097159//organic cyclic compound binding;GO:0016772//transferase activity, transferring phosphorus-containing groups;GO:1901363//heterocyclic compound binding;GO:1901265//nucleoside phosphate binding;GO:0005488//binding;GO:0003824//catalytic activity;GO:0000166//nucleotide binding;GO:0036094//small molecule binding;GO:0016301//kinase activity;GO:0003674//molecular_function;GO:0016740//transfer…	GO:0008152//metabolic process;GO:0009987//cellular process;GO:0043412//macromolecule modification;GO:0044238//primary metabolic process;GO:0044267//cellular protein metabolic process;GO:0036211//protein modification process;GO:0008150//biological_process;GO:0071704//organic substance metabolic process;GO:0019538//protein metabolic process;GO:0044260//cellular macromolecule metabolic process;GO:00…
Bra008061	94.3333	203.333	5.67667	12.13	1.09546	1.33607e-05	0.000343857	yes	AT1G72970 (E=1e-315) HTH, EDA17 | HTH (HOTHEAD); FAD binding / aldehyde-lyase/ mandelonitrile lyase	-	GO:0003674//molecular_function;GO:1901363//heterocyclic compound binding;GO:0000166//nucleotide binding;GO:0097159//organic cyclic compound binding;GO:0003824//catalytic activity;GO:1901265//nucleoside phosphate binding;GO:0005488//binding;GO:0036094//small molecule binding	GO:0071704//organic substance metabolic process;GO:0006629//lipid metabolic process;GO:0044710//single-organism metabolic process;GO:0009987//cellular process;GO:0008152//metabolic process;GO:0044238//primary metabolic process;GO:0044699//single-organism process;GO:0008150//biological_process
Bra008071	17.3333	5.66667	5.58	1.89667	-1.5568	0.00369247	0.0384909	yes	AT1G73120 (E=6e-042) | unknown protein	-	-	GO:0050896//response to stimulus;GO:0006950//response to stress;GO:0008150//biological_process
Bra008101	175.333	404	34.2867	79.2967	1.20961	0.000544485	0.00818678	yes	AT1G73540 (E=3e-071) atnudt21 | atnudt21 (Arabidopsis thaliana Nudix hydrolase homolog 21); hydrolase	-	GO:0003824//catalytic activity;GO:0016787//hydrolase activity;GO:0003674//molecular_function	-
Bra008124	10.6667	0	1.19667	0.001	-10.2248	1.15371e-05	0.000299406	yes	AT1G74000 (E=3e-144) SS3 | SS3 (STRICTOSIDINE SYNTHASE 3); strictosidine synthase	-	GO:0003824//catalytic activity;GO:0003674//molecular_function	GO:0008152//metabolic process;GO:0009058//biosynthetic process;GO:0008150//biological_process
Bra008146	18.3333	43.3333	2.95	6.94667	1.23561	0.000663599	0.00963723	yes	AT1G74380 (E=3e-109) XXT5 | XXT5 (XYLOGLUCAN XYLOSYLTRANSFERASE 5); transferase/ transferase, transferring glycosyl groups / xyloglucan 6-xylosyltransferase	GO:0005575//cellular_component;GO:0016020//membrane	GO:0003674//molecular_function;GO:0016740//transferase activity;GO:0003824//catalytic activity	-
Bra008155	20.3333	50.6667	2.45	6.03667	1.30097	0.000421342	0.00661372	yes	AT1G74510 (E=2e-136) | kelch repeat-containing F-box family protein	-	GO:0005515//protein binding;GO:0003674//molecular_function;GO:0005488//binding	-
Bra008167	17.3333	60	0.96	3.07	1.67713	0.00393585	0.0402446	yes	AT1G15460 (E=0.0) ATBOR4, BOR4 | BOR4 (REQUIRES HIGH BORON 4); anion exchanger	GO:0005575//cellular_component;GO:0016020//membrane	GO:0005215//transporter activity;GO:0003674//molecular_function	GO:0051234//establishment of localization;GO:0006810//transport;GO:0051179//localization;GO:0008150//biological_process
Bra008187	24.6667	8.66667	2.87667	1.01	-1.51004	0.00245855	0.0279343	yes	-	-	-	-
Bra008192	2.33333	28.3333	0.48	6.34	3.72338	1.41434e-08	6.97381e-07	yes	AT1G75390 (E=8e-034) AtbZIP44 | AtbZIP44 (Arabidopsis thaliana basic leucine-zipper 44); DNA binding / protein heterodimerization/ transcription factor	-	GO:0003700//transcription factor activity, sequence-specific DNA binding;GO:0005488//binding;GO:0001071//nucleic acid binding transcription factor activity;GO:0003676//nucleic acid binding;GO:1901363//heterocyclic compound binding;GO:0097159//organic cyclic compound binding;GO:0003674//molecular_function;GO:0003677//DNA binding	GO:0006807//nitrogen compound metabolic process;GO:0006139//nucleobase-containing compound metabolic process;GO:0008152//metabolic process;GO:0009987//cellular process;GO:0008150//biological_process;GO:0034641//cellular nitrogen compound metabolic process;GO:0044238//primary metabolic process;GO:0006725//cellular aromatic compound metabolic process;GO:0044237//cellular metabolic process;GO:007170…
Bra008242	559.137	261.333	106.187	49.0067	-1.11555	4.5243e-05	0.000996051	yes	AT1G76180 (E=7e-012) ERD14 | ERD14 (EARLY RESPONSE TO DEHYDRATION 14); calcium ion binding	-	-	GO:0006950//response to stress;GO:0008150//biological_process;GO:0050896//response to stimulus;GO:0009628//response to abiotic stimulus
Bra008288	1.66667	15.6667	0.07	0.59	3.07529	1.86749e-05	0.000465958	yes	AT3G42640 (E=0.0) AHA8 | AHA8 (Arabidopsis H(+)-ATPase 8); ATPase	GO:0005575//cellular_component;GO:0005886//plasma membrane;GO:0005623//cell;GO:0071944//cell periphery;GO:0016020//membrane;GO:0044464//cell part	GO:0003824//catalytic activity;GO:0036094//small molecule binding;GO:0097159//organic cyclic compound binding;GO:0005215//transporter activity;GO:0005488//binding;GO:1901363//heterocyclic compound binding;GO:1901265//nucleoside phosphate binding;GO:0000166//nucleotide binding;GO:0016787//hydrolase activity;GO:0003674//molecular_function	GO:1901360//organic cyclic compound metabolic process;GO:0044237//cellular metabolic process;GO:0006807//nitrogen compound metabolic process;GO:0034641//cellular nitrogen compound metabolic process;GO:0009058//biosynthetic process;GO:0051234//establishment of localization;GO:0006810//transport;GO:0006139//nucleobase-containing compound metabolic process;GO:0051179//localization;GO:0008150//biolog…
Bra008291	272.333	113	30.3967	12.64	-1.26592	1.16549e-06	3.85569e-05	yes	AT1G77100 (E=5e-142) | peroxidase, putative	-	GO:0005488//binding;GO:0003824//catalytic activity;GO:0003674//molecular_function	GO:0008150//biological_process;GO:0050896//response to stimulus;GO:0008152//metabolic process;GO:0006950//response to stress
Bra008307	57.6667	23.3333	5.46667	2.18333	-1.32413	6.05709e-05	0.00128699	yes	-	-	-	-
Bra008340	74	20	4.13333	1.09667	-1.91418	8.66866e-09	4.50306e-07	yes	AT1G78000 (E=0.0) SULTR1;2, SEL1 | SULTR1;2 (SULFATE TRANSPORTER 1;2); sulfate transmembrane transporter	GO:0071944//cell periphery;GO:0005623//cell;GO:0005886//plasma membrane;GO:0005575//cellular_component;GO:0016020//membrane;GO:0044464//cell part	GO:0005215//transporter activity;GO:0003674//molecular_function	GO:0051179//localization;GO:0008150//biological_process;GO:0051234//establishment of localization;GO:0006810//transport;GO:0009987//cellular process
Bra008341	17.6667	69.3333	3.92667	15.29	1.96121	5.77264e-07	2.07788e-05	yes	-	-	-	-
Bra008344	1.66667	10	0.17	0.946667	2.47732	0.00434172	0.0435245	yes	AT1G78090 (E=3e-173) ATTPPB | ATTPPB (TREHALOSE-6-PHOSPHATE PHOSPHATASE); trehalose-phosphatase	-	GO:0003824//catalytic activity;GO:0003674//molecular_function;GO:0016787//hydrolase activity	GO:0008152//metabolic process;GO:0009058//biosynthetic process;GO:0071704//organic substance metabolic process;GO:0005975//carbohydrate metabolic process;GO:0044238//primary metabolic process;GO:0009987//cellular process;GO:0008150//biological_process
Bra008367	0	7.20333	0.001	0.78	9.60733	2.15718e-05	0.000527642	yes	-	-	-	-
Bra008382	6	0.666667	1.14	0.116667	-3.28857	0.00366222	0.0382654	yes	-	-	-	-
Bra008407	652	167	55.8967	14.1567	-1.98128	2.49594e-16	3.41559e-14	yes	AT1G79330 (E=3e-116) AMC6, ATMCP2B, ATMC5 | ATMC5 (ARABIDOPSIS THALIANA METACASPASE 5); cysteine-type endopeptidase	-	GO:0003674//molecular_function;GO:0016787//hydrolase activity;GO:0003824//catalytic activity	GO:0071704//organic substance metabolic process;GO:0008150//biological_process;GO:0019538//protein metabolic process;GO:0044238//primary metabolic process;GO:0043170//macromolecule metabolic process;GO:0008152//metabolic process
Bra008423	5.66667	0.333333	0.6	0.03	-4.32193	0.0030855	0.0335016	yes	AT1G79580 (E=3e-105) SMB | SMB (SOMBRERO); transcription factor	GO:0005634//nucleus;GO:0044424//intracellular part;GO:0043226//organelle;GO:0043231//intracellular membrane-bounded organelle;GO:0005623//cell;GO:0043227//membrane-bounded organelle;GO:0044464//cell part;GO:0005575//cellular_component;GO:0043229//intracellular organelle;GO:0005622//intracellular	GO:0003676//nucleic acid binding;GO:1901363//heterocyclic compound binding;GO:0097159//organic cyclic compound binding;GO:0003674//molecular_function;GO:0003677//DNA binding;GO:0005488//binding	GO:0006725//cellular aromatic compound metabolic process;GO:0046483//heterocycle metabolic process;GO:0071704//organic substance metabolic process;GO:0006139//nucleobase-containing compound metabolic process;GO:0008152//metabolic process;GO:0009987//cellular process;GO:0006807//nitrogen compound metabolic process;GO:1901360//organic cyclic compound metabolic process;GO:0034641//cellular nitrogen …
Bra008430	129.667	62.3333	30.8867	14.4867	-1.09226	8.02368e-05	0.00163334	yes	-	-	-	-
Bra008438	37.6667	10	4.01667	1.11667	-1.8468	0.00256439	0.0288415	yes	AT1G80820 (E=4e-165) CCR2, ATCCR2 | CCR2 (CINNAMOYL COA REDUCTASE); cinnamoyl-CoA reductase	-	GO:0003824//catalytic activity;GO:0003674//molecular_function;GO:0005488//binding	GO:0008150//biological_process;GO:0009987//cellular process;GO:0008152//metabolic process
Bra008472	36.3333	11	2.9	0.88	-1.72048	5.48846e-05	0.00117744	yes	AT1G80460 (E=4e-218) NHO1, GLI1 | NHO1 (nonhost resistance to P. s. phaseolicola 1); carbohydrate kinase/ glycerol kinase	-	GO:0003674//molecular_function;GO:0016772//transferase activity, transferring phosphorus-containing groups;GO:0016740//transferase activity;GO:0016301//kinase activity;GO:0003824//catalytic activity	GO:0071704//organic substance metabolic process;GO:0044238//primary metabolic process;GO:0008150//biological_process;GO:0009987//cellular process;GO:0008152//metabolic process;GO:0005975//carbohydrate metabolic process
Bra008495	37.3333	1	4.64	0.126667	-5.19502	1.14806e-10	7.99627e-09	yes	AT1G80130 (E=2e-091) | binding	-	GO:0003674//molecular_function;GO:0005488//binding;GO:0005515//protein binding	-
Bra008502	32	8.66667	3.09	0.85	-1.86207	6.50872e-05	0.00136428	yes	AT1G79910 (E=1e-125) | unknown protein	-	-	GO:0051179//localization;GO:0006810//transport;GO:0051234//establishment of localization;GO:0008150//biological_process
Bra008519	104.667	48.6667	6.78667	3.2	-1.08463	0.00111254	0.0146751	yes	AT4G00360 (E=4e-301) CYP86A2, ATT1 | CYP86A2 (CYTOCHROME P450 86 A2); fatty acid (omega-1)-hydroxylase/ oxygen binding	-	GO:0003674//molecular_function;GO:0003824//catalytic activity;GO:0005488//binding	GO:0008150//biological_process;GO:0008152//metabolic process
Bra008537	0	27.3133	0.001	3.98333	11.9598	2.84079e-13	2.81039e-11	yes	-	-	-	-
Bra008551	41	18	7.00333	2.96667	-1.2392	0.00169642	0.0205258	yes	AT1G01050 (E=8e-113) AtPPa1 | AtPPa1 (Arabidopsis thaliana pyrophosphorylase 1); inorganic diphosphatase	GO:0005623//cell;GO:0044424//intracellular part;GO:0005622//intracellular;GO:0044464//cell part;GO:0005737//cytoplasm;GO:0005575//cellular_component	GO:0003674//molecular_function;GO:0003824//catalytic activity;GO:0016787//hydrolase activity;GO:0005488//binding	GO:0008150//biological_process;GO:0009987//cellular process;GO:0008152//metabolic process
Bra008563	67	9.33333	6.80667	0.93	-2.87165	5.6412e-11	4.12325e-09	yes	AT5G17300 (E=2e-106) | myb family transcription factor	-	GO:1901363//heterocyclic compound binding;GO:0003682//chromatin binding;GO:0003677//DNA binding;GO:0005488//binding;GO:0003674//molecular_function;GO:0097159//organic cyclic compound binding;GO:0044877//macromolecular complex binding;GO:0003676//nucleic acid binding	-
Bra008632	227.667	101.667	20.6767	9.23333	-1.16308	9.19025e-06	0.000245658	yes	AT5G16230 (E=3e-202) | acyl-(acyl-carrier-protein) desaturase, putative / stearoyl-ACP desaturase, putative	-	GO:0005488//binding;GO:0003824//catalytic activity;GO:0003674//molecular_function	GO:0044238//primary metabolic process;GO:0009987//cellular process;GO:0044699//single-organism process;GO:0044710//single-organism metabolic process;GO:0006629//lipid metabolic process;GO:0008152//metabolic process;GO:0071704//organic substance metabolic process;GO:0008150//biological_process
Bra008697	7.33333	0	1.51667	0.001	-10.5667	7.7314e-05	0.00158005	yes	-	-	-	-
Bra008720	42	5.33333	5.14667	0.67	-2.94141	2.09946e-05	0.000516433	yes	AT5G15120 (E=3e-122) | unknown protein	-	GO:0003674//molecular_function;GO:0003824//catalytic activity	GO:0008152//metabolic process;GO:0008150//biological_process
Bra008746	43	91	8.17333	17.1233	1.06697	0.000635394	0.00929279	yes	AT5G14670 (E=7e-099) ATARFA1B | ATARFA1B (ADP-ribosylation factor A1B); GTP binding / phospholipase activator/ protein binding	GO:0043231//intracellular membrane-bounded organelle;GO:0005622//intracellular;GO:0005623//cell;GO:0005575//cellular_component;GO:0005737//cytoplasm;GO:0043229//intracellular organelle;GO:0043227//membrane-bounded organelle;GO:0043226//organelle;GO:0005794//Golgi apparatus;GO:0044444//cytoplasmic part;GO:0044424//intracellular part;GO:0012505//endomembrane system;GO:0044464//cell part	GO:0036094//small molecule binding;GO:0098772//molecular function regulator;GO:0005488//binding;GO:0000166//nucleotide binding;GO:1901265//nucleoside phosphate binding;GO:0003674//molecular_function;GO:1901363//heterocyclic compound binding;GO:0097159//organic cyclic compound binding;GO:0030234//enzyme regulator activity	GO:0051716//cellular response to stimulus;GO:0043170//macromolecule metabolic process;GO:0050794//regulation of cellular process;GO:0043412//macromolecule modification;GO:0008152//metabolic process;GO:0044763//single-organism cellular process;GO:0044238//primary metabolic process;GO:0071704//organic substance metabolic process;GO:0065007//biological regulation;GO:0044237//cellular metabolic proce…
Bra008757	268.667	2591.67	25.0833	240.157	3.25917	8.83778e-52	1.19364e-48	yes	AT5G14450 (E=4e-206) | GDSL-motif lipase/hydrolase family protein	GO:0071944//cell periphery;GO:0005575//cellular_component;GO:0005618//cell wall;GO:0005623//cell;GO:0044464//cell part;GO:0030312//external encapsulating structure	GO:0016787//hydrolase activity;GO:0003674//molecular_function;GO:0003824//catalytic activity	GO:0008150//biological_process;GO:0006629//lipid metabolic process;GO:0071704//organic substance metabolic process;GO:0008152//metabolic process;GO:0044238//primary metabolic process;GO:0044710//single-organism metabolic process;GO:0044699//single-organism process
Bra008760	21	4.33333	1.82333	0.346667	-2.39496	0.000804196	0.011309	yes	AT5G14400 (E=2e-128) CYP724A1 | CYP724A1; electron carrier/ heme binding / iron ion binding / monooxygenase/ oxygen binding	-	GO:0003824//catalytic activity;GO:0003674//molecular_function;GO:0005488//binding	GO:0008150//biological_process;GO:0008152//metabolic process
Bra008774	392	157	34.83	14.0933	-1.30532	7.60325e-08	3.23544e-06	yes	AT5G14180 (E=1e-211) MPL1 | MPL1 (MYZUS PERSICAE-INDUCED LIPASE 1); catalytic	-	GO:0003674//molecular_function;GO:0003824//catalytic activity;GO:0016787//hydrolase activity	GO:0071704//organic substance metabolic process;GO:0006950//response to stress;GO:0008152//metabolic process;GO:0044699//single-organism process;GO:0009607//response to biotic stimulus;GO:0008150//biological_process;GO:0009987//cellular process;GO:0050896//response to stimulus;GO:0044710//single-organism metabolic process;GO:0006629//lipid metabolic process;GO:0009056//catabolic process;GO:000960…
Bra008775	20.3333	77	2.81	10.5767	1.91224	1.06214e-06	3.55927e-05	yes	AT5G14130 (E=1e-105) | peroxidase, putative	-	GO:0003824//catalytic activity;GO:0005488//binding;GO:0003674//molecular_function	GO:0006950//response to stress;GO:0008150//biological_process;GO:0050896//response to stimulus;GO:0008152//metabolic process
Bra008776	126	274.333	7.71333	16.94	1.13501	9.64839e-06	0.000256169	yes	-	-	-	-
Bra008792	766.333	86.6667	71.54	7.98667	-3.16308	2.69679e-24	7.03975e-22	yes	AT5G13930 (E=4e-219) CHS, TT4, ATCHS | TT4 (TRANSPARENT TESTA 4); naringenin-chalcone synthase	-	GO:0003824//catalytic activity;GO:0003674//molecular_function;GO:0016740//transferase activity	GO:0008150//biological_process;GO:0009058//biosynthetic process;GO:0008152//metabolic process
Bra008797	187	89.3333	32.0567	15.2867	-1.06835	1.85198e-05	0.000463578	yes	AT3G12390 (E=2e-047) | nascent polypeptide associated complex alpha chain protein, putative / alpha-NAC, putative	GO:0005737//cytoplasm;GO:0005794//Golgi apparatus;GO:1990904//ribonucleoprotein complex;GO:0044444//cytoplasmic part;GO:0043228//non-membrane-bounded organelle;GO:0005622//intracellular;GO:0005623//cell;GO:0012505//endomembrane system;GO:0043229//intracellular organelle;GO:0030529//intracellular ribonucleoprotein complex;GO:0044464//cell part;GO:0043231//intracellular membrane-bounded organelle;G…	-	GO:0008150//biological_process;GO:0019538//protein metabolic process;GO:0008152//metabolic process;GO:0044238//primary metabolic process;GO:0071704//organic substance metabolic process;GO:0043170//macromolecule metabolic process
Bra008805	7.67333	1	0.57	0.0766667	-2.89429	0.000955701	0.0129868	yes	AT5G13750 (E=3e-241) ZIFL1 | ZIFL1 (ZINC INDUCED FACILITATOR-like 1); tetracycline:hydrogen antiporter	GO:0005886//plasma membrane;GO:0005575//cellular_component;GO:0016020//membrane;GO:0005623//cell;GO:0071944//cell periphery;GO:0044464//cell part	GO:0003674//molecular_function;GO:0005215//transporter activity	GO:0051179//localization;GO:0009987//cellular process;GO:0006810//transport;GO:0051234//establishment of localization;GO:0008150//biological_process
Bra008848	7.33333	1	2.64667	0.346667	-2.93256	0.00174303	0.0209269	yes	-	-	-	-
Bra008850	208.667	85	36.59	14.5167	-1.33374	5.28377e-07	1.913e-05	yes	AT5G13170 (E=4e-086) SAG29 | SAG29 (SENESCENCE-ASSOCIATED PROTEIN 29)	GO:0071944//cell periphery;GO:0005886//plasma membrane;GO:0005623//cell;GO:0044464//cell part;GO:0005575//cellular_component;GO:0016020//membrane	-	GO:0051234//establishment of localization;GO:0008150//biological_process;GO:0006810//transport;GO:0051179//localization
Bra008883	14	2.33333	1.07	0.18	-2.57154	0.000153887	0.00284206	yes	-	-	-	-
Bra008898	15	1.66667	1.81	0.213333	-3.08481	3.58209e-05	0.000811036	yes	-	-	-	-
Bra008900	899	158.667	122.993	22.0567	-2.47929	1.33824e-27	4.51859e-25	yes	AT5G12310 (E=1e-074) | zinc finger (C3HC4-type RING finger) family protein	-	GO:0005515//protein binding;GO:0003674//molecular_function;GO:0005488//binding	-
Bra008907	27.3333	58	3.20667	6.65333	1.053	0.00263924	0.0295102	yes	AT5G12210 (E=2e-167) | geranylgeranyl transferase type II beta subunit, putative / RAB geranylgeranyltransferase beta subunit, putative	GO:0005622//intracellular;GO:0005575//cellular_component;GO:0044444//cytoplasmic part;GO:0044464//cell part;GO:0005737//cytoplasm;GO:0044424//intracellular part;GO:0005829//cytosol;GO:0005623//cell	GO:0003824//catalytic activity;GO:0003674//molecular_function;GO:0016740//transferase activity	GO:0008152//metabolic process;GO:0044238//primary metabolic process;GO:0071704//organic substance metabolic process;GO:0043170//macromolecule metabolic process;GO:0009987//cellular process;GO:0044267//cellular protein metabolic process;GO:0043412//macromolecule modification;GO:0019538//protein metabolic process;GO:0036211//protein modification process;GO:0044237//cellular metabolic process;GO:000…
Bra008915	5	72.3333	0.8	11.5833	3.85591	2.7133e-18	4.27848e-16	yes	AT5G12110 (E=2e-085) | elongation factor 1B alpha-subunit 1 (eEF1Balpha1)	GO:0005737//cytoplasm;GO:0005623//cell;GO:0044424//intracellular part;GO:0044464//cell part;GO:0005622//intracellular;GO:0005575//cellular_component	GO:0008135//translation factor activity, RNA binding;GO:0005488//binding;GO:1901363//heterocyclic compound binding;GO:0003676//nucleic acid binding;GO:0003723//RNA binding;GO:0097159//organic cyclic compound binding;GO:0003674//molecular_function	GO:0034645//cellular macromolecule biosynthetic process;GO:1901566//organonitrogen compound biosynthetic process;GO:0006518//peptide metabolic process;GO:0019538//protein metabolic process;GO:0043043//peptide biosynthetic process;GO:0044238//primary metabolic process;GO:0034641//cellular nitrogen compound metabolic process;GO:0009987//cellular process;GO:0044237//cellular metabolic process;GO:000…
Bra008919	21.3333	5.33333	1.80333	0.466667	-1.9502	0.000568003	0.00847476	yes	AT5G12040 (E=8e-147) | carbon-nitrogen hydrolase family protein	-	GO:0003674//molecular_function;GO:0003824//catalytic activity;GO:0016787//hydrolase activity	GO:0008150//biological_process;GO:0008152//metabolic process
Bra008920	80.6667	336.667	18.6967	77.23	2.04638	4.61102e-17	6.66218e-15	yes	AT5G12020 (E=1e-064) HSP17.6II | HSP17.6II (17.6 KDA CLASS II HEAT SHOCK PROTEIN)	GO:0005575//cellular_component;GO:0044444//cytoplasmic part;GO:0005623//cell;GO:0005737//cytoplasm;GO:0005622//intracellular;GO:0044464//cell part;GO:0044424//intracellular part;GO:0005829//cytosol	GO:0003674//molecular_function;GO:0005515//protein binding;GO:0005488//binding	GO:0009987//cellular process;GO:0009628//response to abiotic stimulus;GO:0008150//biological_process;GO:0006950//response to stress;GO:0050896//response to stimulus
Bra008921	8.33333	87.6667	0.443333	4.6	3.37517	8.49704e-15	1.01131e-12	yes	AT5G12000 (E=2e-297) | kinase	-	GO:0016740//transferase activity;GO:1901265//nucleoside phosphate binding;GO:1901363//heterocyclic compound binding;GO:0000166//nucleotide binding;GO:0005488//binding;GO:0016301//kinase activity;GO:0016772//transferase activity, transferring phosphorus-containing groups;GO:0097159//organic cyclic compound binding;GO:0036094//small molecule binding;GO:0003674//molecular_function;GO:0003824//cataly…	GO:0006950//response to stress;GO:0050896//response to stimulus;GO:0044237//cellular metabolic process;GO:0008152//metabolic process;GO:0071704//organic substance metabolic process;GO:0044238//primary metabolic process;GO:0006464//cellular protein modification process;GO:0036211//protein modification process;GO:0043412//macromolecule modification;GO:0008150//biological_process;GO:0019538//protein…
Bra008928	201.333	20.3333	36.7933	3.80667	-3.27284	6.32574e-26	1.83647e-23	yes	AT5G11900 (E=3e-097) | eukaryotic translation initiation factor SUI1 family protein	GO:0005840//ribosome;GO:0043229//intracellular organelle;GO:0005622//intracellular;GO:0030529//intracellular ribonucleoprotein complex;GO:0044424//intracellular part;GO:0005623//cell;GO:0043228//non-membrane-bounded organelle;GO:1990904//ribonucleoprotein complex;GO:0005575//cellular_component;GO:0032991//macromolecular complex;GO:0044444//cytoplasmic part;GO:0005737//cytoplasm;GO:0043232//intrac…	GO:0005488//binding;GO:0003674//molecular_function;GO:0003676//nucleic acid binding;GO:0008135//translation factor activity, RNA binding;GO:0003723//RNA binding;GO:1901363//heterocyclic compound binding;GO:0097159//organic cyclic compound binding	GO:0071704//organic substance metabolic process;GO:0008150//biological_process;GO:0008152//metabolic process;GO:1901576//organic substance biosynthetic process;GO:1901564//organonitrogen compound metabolic process;GO:0043043//peptide biosynthetic process;GO:0034641//cellular nitrogen compound metabolic process;GO:0006807//nitrogen compound metabolic process;GO:0009987//cellular process;GO:0019538…
Bra008933	13.3333	3.33333	1.54	0.406667	-1.92101	0.00345019	0.0365541	yes	AT5G11860 (E=1e-133) | NLI interacting factor (NIF) family protein	-	GO:0003674//molecular_function;GO:0016787//hydrolase activity;GO:0003824//catalytic activity	GO:0009987//cellular process;GO:0008152//metabolic process;GO:0008150//biological_process
Bra008939	2	73.3333	0.306667	11.6633	5.24916	1.69008e-19	3.03472e-17	yes	AT4G11630 (E=3e-078) | ribosomal protein L19 family protein	GO:0043228//non-membrane-bounded organelle;GO:0005575//cellular_component;GO:0043226//organelle;GO:0005623//cell;GO:0032991//macromolecular complex;GO:0043232//intracellular non-membrane-bounded organelle;GO:0005840//ribosome;GO:0005737//cytoplasm;GO:0030529//intracellular ribonucleoprotein complex;GO:1990904//ribonucleoprotein complex;GO:0043229//intracellular organelle;GO:0044444//cytoplasmic p…	GO:0005198//structural molecule activity;GO:0003674//molecular_function	GO:0034645//cellular macromolecule biosynthetic process;GO:0006807//nitrogen compound metabolic process;GO:0043604//amide biosynthetic process;GO:1901576//organic substance biosynthetic process;GO:0006518//peptide metabolic process;GO:0044267//cellular protein metabolic process;GO:0044238//primary metabolic process;GO:1901564//organonitrogen compound metabolic process;GO:0009058//biosynthetic pro…
Bra008942	12.6667	0.666667	1.60667	0.08	-4.32793	2.10191e-06	6.60199e-05	yes	AT5G11710 (E=5e-034) | epsin N-terminal homology (ENTH) domain-containing protein / clathrin assembly protein-related	GO:0044424//intracellular part;GO:0044464//cell part;GO:0043232//intracellular non-membrane-bounded organelle;GO:0043226//organelle;GO:0005794//Golgi apparatus;GO:0043227//membrane-bounded organelle;GO:0005856//cytoskeleton;GO:0005737//cytoplasm;GO:0005622//intracellular;GO:0005575//cellular_component;GO:0043229//intracellular organelle;GO:0044444//cytoplasmic part;GO:0005623//cell;GO:0009579//th…	GO:0005488//binding;GO:0003674//molecular_function;GO:0005515//protein binding	GO:0051234//establishment of localization;GO:0051179//localization;GO:0008150//biological_process;GO:0006810//transport
Bra008946	0	4	0.001	0.39	8.60733	0.00249445	0.028239	yes	AT5G14470 (E=3e-052) | GHMP kinase-related	GO:0044424//intracellular part;GO:0044464//cell part;GO:0005623//cell;GO:0005622//intracellular;GO:0005575//cellular_component;GO:0005737//cytoplasm	GO:0016772//transferase activity, transferring phosphorus-containing groups;GO:1901363//heterocyclic compound binding;GO:0003674//molecular_function;GO:0016301//kinase activity;GO:0003824//catalytic activity;GO:0016740//transferase activity;GO:0000166//nucleotide binding;GO:0036094//small molecule binding;GO:0097159//organic cyclic compound binding;GO:1901265//nucleoside phosphate binding;GO:0005…	GO:0009987//cellular process;GO:0008152//metabolic process;GO:0008150//biological_process
Bra008948	33	6.66667	4.73667	1	-2.24387	4.26152e-06	0.000123259	yes	-	-	-	-
Bra008951	39.6667	16.3333	2.69667	1.1	-1.29367	0.0019647	0.023153	yes	-	-	-	-
Bra008970	53.3333	24	4.93667	2.13667	-1.20818	0.0019602	0.0231088	yes	AT5G11330 (E=3e-203) | monooxygenase family protein	-	GO:0000166//nucleotide binding;GO:0036094//small molecule binding;GO:0003674//molecular_function;GO:1901363//heterocyclic compound binding;GO:0003824//catalytic activity;GO:0097159//organic cyclic compound binding;GO:1901265//nucleoside phosphate binding;GO:0005488//binding	GO:0008152//metabolic process;GO:0008150//biological_process
Bra008984	32.8267	7.53333	2.76	0.623333	-2.14659	1.86527e-06	5.93069e-05	yes	AT5G11200 (E=5e-102) | DEAD/DEAH box helicase, putative	-	GO:0016787//hydrolase activity;GO:0005488//binding;GO:1901363//heterocyclic compound binding;GO:0036094//small molecule binding;GO:1901265//nucleoside phosphate binding;GO:0000166//nucleotide binding;GO:0003676//nucleic acid binding;GO:0097159//organic cyclic compound binding;GO:0003674//molecular_function;GO:0003824//catalytic activity	-
Bra008993	38	4	9.22	1.02667	-3.1668	5.9999e-07	2.15719e-05	yes	-	-	-	-
Bra009000	1.33333	12.3333	0.21	1.78	3.08342	0.000176219	0.00317891	yes	AT5G10970 (E=2e-094) | zinc finger (C2H2 type) family protein	-	GO:0003676//nucleic acid binding;GO:0097159//organic cyclic compound binding;GO:0003674//molecular_function;GO:1901363//heterocyclic compound binding;GO:0001071//nucleic acid binding transcription factor activity;GO:0005488//binding;GO:0003700//transcription factor activity, sequence-specific DNA binding	GO:0034641//cellular nitrogen compound metabolic process;GO:0006807//nitrogen compound metabolic process;GO:0046483//heterocycle metabolic process;GO:0006139//nucleobase-containing compound metabolic process;GO:0044238//primary metabolic process;GO:0008152//metabolic process;GO:0009987//cellular process;GO:0071704//organic substance metabolic process;GO:1901360//organic cyclic compound metabolic …
Bra009006	129.333	48.6667	4.59667	1.77333	-1.37412	8.61864e-06	0.000232529	yes	AT5G10770 (E=2e-205) | chloroplast nucleoid DNA-binding protein, putative	-	GO:0003824//catalytic activity;GO:0016787//hydrolase activity;GO:0003674//molecular_function	GO:0008150//biological_process;GO:0071704//organic substance metabolic process;GO:0043170//macromolecule metabolic process;GO:0044238//primary metabolic process;GO:0008152//metabolic process;GO:0019538//protein metabolic process
Bra009020	74.3333	187.217	5.44	13.7367	1.33635	1.00951e-07	4.17568e-06	yes	AT5G10610 (E=3e-235) CYP81K1 | CYP81K1; electron carrier/ heme binding / iron ion binding / monooxygenase/ oxygen binding	-	GO:0003674//molecular_function;GO:0003824//catalytic activity;GO:0005488//binding	GO:0008150//biological_process;GO:0008152//metabolic process
Bra009025	40.3333	9.66667	3.04333	0.733333	-2.05311	0.000326048	0.00534196	yes	AT5G10520 (E=2e-210) RBK1 | RBK1 (Rop Binding protein Kinases 1); ATP binding / kinase/ protein kinase/ protein serine/threonine kinase	-	GO:0097159//organic cyclic compound binding;GO:0005488//binding;GO:1901363//heterocyclic compound binding;GO:0003824//catalytic activity;GO:0016772//transferase activity, transferring phosphorus-containing groups;GO:0000166//nucleotide binding;GO:1901265//nucleoside phosphate binding;GO:0036094//small molecule binding;GO:0016301//kinase activity;GO:0016740//transferase activity;GO:0003674//molecu…	GO:0008150//biological_process;GO:0009987//cellular process;GO:0044267//cellular protein metabolic process;GO:0043170//macromolecule metabolic process;GO:0006464//cellular protein modification process;GO:0044237//cellular metabolic process;GO:0071704//organic substance metabolic process;GO:0008152//metabolic process;GO:0044238//primary metabolic process;GO:0036211//protein modification process;GO…
Bra009037	21.6667	4.66667	2.67	0.576667	-2.21103	0.000297782	0.00494933	yes	AT5G10380 (E=1e-055) RING1 | RING1; protein binding / ubiquitin-protein ligase/ zinc ion binding	GO:0005623//cell;GO:0044464//cell part;GO:0071944//cell periphery;GO:0005575//cellular_component;GO:0016020//membrane;GO:0005886//plasma membrane	GO:0005488//binding;GO:0003824//catalytic activity;GO:0016740//transferase activity;GO:0003674//molecular_function;GO:0005515//protein binding	GO:0065007//biological regulation;GO:0007154//cell communication;GO:0050794//regulation of cellular process;GO:0006807//nitrogen compound metabolic process;GO:0034641//cellular nitrogen compound metabolic process;GO:0008152//metabolic process;GO:0009058//biosynthetic process;GO:0009607//response to biotic stimulus;GO:0008219//cell death;GO:0044699//single-organism process;GO:0006464//cellular pro…
Bra009041	16	4.66667	1.87333	0.563333	-1.73355	0.0047342	0.0465685	yes	-	-	-	-
Bra009047	15	1.33333	0.896667	0.08	-3.4865	6.82401e-05	0.00142365	yes	AT5G10250 (E=5e-164) DOT3 | DOT3 (DEFECTIVELY ORGANIZED TRIBUTARIES 3); protein binding / signal transducer	-	GO:0004871//signal transducer activity;GO:0003674//molecular_function;GO:0005488//binding;GO:0005515//protein binding	GO:0043412//macromolecule modification;GO:0050794//regulation of cellular process;GO:0051716//cellular response to stimulus;GO:0032501//multicellular organismal process;GO:0007275//multicellular organism development;GO:0044707//single-multicellular organism process;GO:0006464//cellular protein modification process;GO:0044699//single-organism process;GO:0050896//response to stimulus;GO:0009628//re…
Bra009066	0	23	0.001	7.97333	12.961	9.12317e-09	4.69987e-07	yes	AT5G10000 (E=8e-032) ATFD4 | ATFD4 (ferredoxin 4); 2 iron, 2 sulfur cluster binding / electron carrier/ iron-sulfur cluster binding	-	GO:0003674//molecular_function;GO:0005488//binding	GO:0009987//cellular process;GO:0006091//generation of precursor metabolites and energy;GO:0008152//metabolic process;GO:0008150//biological_process;GO:0044237//cellular metabolic process
Bra009070	120	34.3333	7.97	2.28667	-1.80133	4.74538e-08	2.08501e-06	yes	AT5G09970 (E=3e-284) CYP78A7 | CYP78A7; electron carrier/ heme binding / iron ion binding / monooxygenase/ oxygen binding	-	GO:0003674//molecular_function;GO:0005488//binding;GO:0003824//catalytic activity	GO:0000003//reproduction;GO:0008150//biological_process;GO:0061458//reproductive system development;GO:0044699//single-organism process;GO:0048856//anatomical structure development;GO:0008152//metabolic process;GO:0048608//reproductive structure development;GO:0048731//system development;GO:0044702//single organism reproductive process;GO:0032501//multicellular organismal process;GO:0090567//repr…
Bra009079	22.3333	82.6667	0.96	3.33333	1.79586	5.28803e-05	0.00113759	yes	AT5G09840 (E=5e-282) | unknown protein	GO:0042579//microbody;GO:0005623//cell;GO:0043226//organelle;GO:0005739//mitochondrion;GO:0005575//cellular_component;GO:0043231//intracellular membrane-bounded organelle;GO:0043229//intracellular organelle;GO:0043227//membrane-bounded organelle;GO:0044444//cytoplasmic part;GO:0005622//intracellular;GO:0044424//intracellular part;GO:0005777//peroxisome;GO:0044464//cell part;GO:0005737//cytoplasm	-	GO:0008152//metabolic process;GO:0051179//localization;GO:0008150//biological_process;GO:0006810//transport;GO:0051234//establishment of localization
Bra009089	11.3333	61.6667	0.486667	2.62	2.42856	3.65191e-09	2.0477e-07	yes	AT5G05130 (E=9e-271) | SNF2 domain-containing protein / helicase domain-containing protein / RING finger domain-containing protein	-	GO:0036094//small molecule binding;GO:0016787//hydrolase activity;GO:0097159//organic cyclic compound binding;GO:0003676//nucleic acid binding;GO:1901363//heterocyclic compound binding;GO:0000166//nucleotide binding;GO:0005488//binding;GO:0003824//catalytic activity;GO:0003674//molecular_function;GO:1901265//nucleoside phosphate binding;GO:0003677//DNA binding;GO:0005515//protein binding	-
Bra009096	6.33333	103.333	1.61667	26.6667	4.04394	2.78873e-20	5.48286e-18	yes	AT5G05220 (E=8e-049) | unknown protein	GO:0005623//cell;GO:0005622//intracellular;GO:0044464//cell part;GO:0043231//intracellular membrane-bounded organelle;GO:0009536//plastid;GO:0044424//intracellular part;GO:0043229//intracellular organelle;GO:0005575//cellular_component;GO:0043226//organelle;GO:0043227//membrane-bounded organelle;GO:0005737//cytoplasm;GO:0044444//cytoplasmic part	-	-
Bra009099	19	5	3.07333	0.81	-1.92381	0.00103495	0.0138253	yes	-	-	-	-
Bra009101	86.3333	19.6667	15.5033	3.44333	-2.1707	3.74165e-08	1.67963e-06	yes	AT5G05270 (E=2e-069) | chalcone-flavanone isomerase family protein	-	GO:0003824//catalytic activity;GO:0003674//molecular_function	GO:0009058//biosynthetic process;GO:0050896//response to stimulus;GO:0008152//metabolic process;GO:0008150//biological_process;GO:0009628//response to abiotic stimulus
Bra009105	19	4.66667	2.47333	0.616667	-2.00389	0.000338525	0.0055115	yes	AT5G05340 (E=4e-130) | peroxidase, putative	-	GO:0003674//molecular_function;GO:0005488//binding;GO:0003824//catalytic activity	GO:0008152//metabolic process;GO:0050896//response to stimulus;GO:0008150//biological_process;GO:0006950//response to stress
Bra009111	0	9.66667	0.001	0.703333	9.45806	1.27946e-06	4.19696e-05	yes	AT5G05390 (E=3e-277) LAC12 | LAC12 (laccase 12); laccase	GO:0005576//extracellular region;GO:0005575//cellular_component	GO:0005488//binding;GO:0003674//molecular_function;GO:0003824//catalytic activity	GO:0008150//biological_process;GO:0044699//single-organism process;GO:0019748//secondary metabolic process;GO:0009987//cellular process;GO:0008152//metabolic process;GO:0009056//catabolic process;GO:0044710//single-organism metabolic process
Bra009124	3	15.6667	0.433333	2.24	2.36995	0.000198445	0.00351453	yes	-	-	-	-
Bra009127	21.6667	72	1.27	4.14	1.7048	5.58532e-07	2.01747e-05	yes	AT3G11240 (E=2e-203) ATE2 | ATE2 (ARGININE-TRNA PROTEIN TRANSFERASE 2); arginyltransferase	GO:0044464//cell part;GO:0005575//cellular_component;GO:0044424//intracellular part;GO:0005737//cytoplasm;GO:0005622//intracellular;GO:0005623//cell	GO:0003824//catalytic activity;GO:0016740//transferase activity;GO:1901265//nucleoside phosphate binding;GO:0000166//nucleotide binding;GO:1901363//heterocyclic compound binding;GO:0005488//binding;GO:0097159//organic cyclic compound binding;GO:0036094//small molecule binding;GO:0003674//molecular_function	GO:0044260//cellular macromolecule metabolic process;GO:0051234//establishment of localization;GO:0006810//transport;GO:0050896//response to stimulus;GO:0034641//cellular nitrogen compound metabolic process;GO:0006807//nitrogen compound metabolic process;GO:0006725//cellular aromatic compound metabolic process;GO:0007275//multicellular organism development;GO:0009056//catabolic process;GO:0009987…
Bra009134	1.33333	9	0.186667	1.25	2.74339	0.00229715	0.026488	yes	AT5G05790 (E=1e-126) | myb family transcription factor	GO:0005623//cell;GO:0005575//cellular_component;GO:0043226//organelle;GO:0005622//intracellular;GO:0044464//cell part;GO:0043229//intracellular organelle;GO:0043227//membrane-bounded organelle;GO:0043231//intracellular membrane-bounded organelle;GO:0005634//nucleus;GO:0044424//intracellular part	GO:0003677//DNA binding;GO:0044877//macromolecular complex binding;GO:0005488//binding;GO:0003676//nucleic acid binding;GO:0003674//molecular_function;GO:0001071//nucleic acid binding transcription factor activity;GO:0003700//transcription factor activity, sequence-specific DNA binding;GO:1901363//heterocyclic compound binding;GO:0097159//organic cyclic compound binding;GO:0003682//chromatin bind…	GO:0034641//cellular nitrogen compound metabolic process;GO:0006725//cellular aromatic compound metabolic process;GO:0008150//biological_process;GO:1901360//organic cyclic compound metabolic process;GO:0006807//nitrogen compound metabolic process;GO:0006139//nucleobase-containing compound metabolic process;GO:0044238//primary metabolic process;GO:0046483//heterocycle metabolic process;GO:0008152/…
Bra009140	65.3333	31.3333	4.67667	2.23333	-1.06628	0.00064208	0.00936411	yes	AT5G05850 (E=5e-229) | leucine-rich repeat family protein	-	GO:0003674//molecular_function;GO:0005515//protein binding;GO:0005488//binding	GO:0032501//multicellular organismal process;GO:0032502//developmental process;GO:0008152//metabolic process;GO:0007275//multicellular organism development;GO:0009987//cellular process;GO:0008150//biological_process;GO:0009058//biosynthetic process;GO:0044699//single-organism process;GO:0044767//single-organism developmental process;GO:0044707//single-multicellular organism process
Bra009141	136.333	1.33333	4.61333	0.0466667	-6.62727	1.39725e-22	3.33878e-20	yes	AT5G22690 (E=3e-236) | disease resistance protein (TIR-NBS-LRR class), putative	-	GO:1901265//nucleoside phosphate binding;GO:0000166//nucleotide binding;GO:0003824//catalytic activity;GO:0005488//binding;GO:1901363//heterocyclic compound binding;GO:0036094//small molecule binding;GO:0016787//hydrolase activity;GO:0005515//protein binding;GO:0097159//organic cyclic compound binding;GO:0003674//molecular_function	GO:0065007//biological regulation;GO:0007165//signal transduction;GO:0044763//single-organism cellular process;GO:0008150//biological_process;GO:0009987//cellular process;GO:0007154//cell communication;GO:0050789//regulation of biological process;GO:0044699//single-organism process;GO:0044700//single organism signaling;GO:0006950//response to stress;GO:0050794//regulation of cellular process;GO:0…
Bra009142	61	8	4.81667	0.663333	-2.86023	4.1873e-10	2.69863e-08	yes	AT5G05860 (E=5e-214) UGT76C2 | UGT76C2; UDP-glycosyltransferase/ cis-zeatin O-beta-D-glucosyltransferase/ cytokinin 7-beta-glucosyltransferase/ cytokinin 9-beta-glucosyltransferase/ trans-zeatin O-beta-D-glucosyltransferase/ transferase, transferring glycosyl groups	-	GO:0016740//transferase activity;GO:0003824//catalytic activity;GO:0003674//molecular_function	GO:0044699//single-organism process;GO:0032501//multicellular organismal process;GO:0007275//multicellular organism development;GO:0008152//metabolic process;GO:0008150//biological_process;GO:0009791//post-embryonic development;GO:0000003//reproduction;GO:0044767//single-organism developmental process;GO:0009987//cellular process;GO:0044707//single-multicellular organism process;GO:0032502//devel…
Bra009143	70.6667	284	5.73667	22.73	1.98631	1.48204e-15	1.89457e-13	yes	AT5G05870 (E=6e-198) UGT76C1 | UGT76C1 (UDP-glucosyl transferase 76C1); UDP-glycosyltransferase/ cis-zeatin O-beta-D-glucosyltransferase/ cytokinin 7-beta-glucosyltransferase/ cytokinin 9-beta-glucosyltransferase/ trans-zeatin O-beta-D-glucosyltransferase/ transferase, transferring gly	-	GO:0003674//molecular_function;GO:0016740//transferase activity;GO:0003824//catalytic activity	GO:0008152//metabolic process;GO:0008150//biological_process
Bra009145	5.33333	18	0.423333	1.42667	1.75278	0.00174481	0.0209269	yes	AT5G05880 (E=5e-181) | UDP-glucoronosyl/UDP-glucosyl transferase family protein	-	GO:0016740//transferase activity;GO:0003674//molecular_function;GO:0003824//catalytic activity	GO:0008150//biological_process;GO:0008152//metabolic process
Bra009150	48	128	4.69333	12.45	1.40746	1.1635e-07	4.78082e-06	yes	AT5G05920 (E=2e-207) DHS, EDA22 | DHS (DEOXYHYPUSINE SYNTHASE)	-	-	GO:0008152//metabolic process;GO:0009058//biosynthetic process;GO:0044267//cellular protein metabolic process;GO:0044767//single-organism developmental process;GO:0043412//macromolecule modification;GO:0007275//multicellular organism development;GO:0044238//primary metabolic process;GO:0036211//protein modification process;GO:0009987//cellular process;GO:0006464//cellular protein modification pro…
Bra009165	0	4	0.001	0.923333	9.85071	0.00203514	0.0238865	yes	AT3G11510 (E=3e-063) | 40S ribosomal protein S14 (RPS14B)	GO:0005623//cell;GO:0005840//ribosome;GO:0043232//intracellular non-membrane-bounded organelle;GO:0005737//cytoplasm;GO:0044444//cytoplasmic part;GO:1990904//ribonucleoprotein complex;GO:0043228//non-membrane-bounded organelle;GO:0044464//cell part;GO:0030529//intracellular ribonucleoprotein complex;GO:0005622//intracellular;GO:0044424//intracellular part;GO:0043226//organelle;GO:0005575//cellula…	GO:0005198//structural molecule activity;GO:0003674//molecular_function	GO:0009058//biosynthetic process;GO:1901566//organonitrogen compound biosynthetic process;GO:0044271//cellular nitrogen compound biosynthetic process;GO:0006807//nitrogen compound metabolic process;GO:0008152//metabolic process;GO:0009059//macromolecule biosynthetic process;GO:0006412//translation;GO:0034641//cellular nitrogen compound metabolic process;GO:0006518//peptide metabolic process;GO:00…
Bra009188	112.667	228.16	15.6033	31.4233	1.00998	2.97281e-05	0.000692778	yes	-	-	-	-
Bra009203	22	5	1.08333	0.233333	-2.21501	0.00156013	0.0192623	yes	AT5G06530 (E=0.0) | ABC transporter family protein	GO:0016020//membrane;GO:0005575//cellular_component	GO:0003824//catalytic activity;GO:0036094//small molecule binding;GO:1901363//heterocyclic compound binding;GO:0000166//nucleotide binding;GO:0097159//organic cyclic compound binding;GO:0016787//hydrolase activity;GO:1901265//nucleoside phosphate binding;GO:0005488//binding;GO:0003674//molecular_function	-
Bra009204	7.33333	26	0.533333	1.80667	1.76022	0.000592054	0.00877879	yes	AT5G06540 (E=2e-260) | pentatricopeptide (PPR) repeat-containing protein	-	GO:0005515//protein binding;GO:0003674//molecular_function;GO:0005488//binding	-
Bra009217	34.6667	15.3333	6.78333	2.89	-1.23092	0.00341117	0.036252	yes	AT5G06690 (E=4e-092) WCRKC1 | WCRKC1 (WCRKC THIOREDOXIN 1)	GO:0009536//plastid;GO:0043227//membrane-bounded organelle;GO:0043231//intracellular membrane-bounded organelle;GO:0044444//cytoplasmic part;GO:0005623//cell;GO:0005622//intracellular;GO:0043226//organelle;GO:0044424//intracellular part;GO:0005737//cytoplasm;GO:0044464//cell part;GO:0043229//intracellular organelle;GO:0005575//cellular_component	GO:0003824//catalytic activity;GO:0003674//molecular_function	GO:0044763//single-organism cellular process;GO:0044699//single-organism process;GO:0065007//biological regulation;GO:0009987//cellular process;GO:0019725//cellular homeostasis;GO:0008152//metabolic process;GO:0065008//regulation of biological quality;GO:0042592//homeostatic process;GO:0008150//biological_process
Bra009221	1701.33	305.333	174.997	31.7567	-2.4622	1.54392e-12	1.37817e-10	yes	AT5G06730 (E=2e-148) | peroxidase, putative	GO:0043226//organelle;GO:0044444//cytoplasmic part;GO:0005737//cytoplasm;GO:0005622//intracellular;GO:0044424//intracellular part;GO:0005623//cell;GO:0043229//intracellular organelle;GO:0044464//cell part;GO:0043227//membrane-bounded organelle;GO:0005773//vacuole;GO:0043231//intracellular membrane-bounded organelle;GO:0005575//cellular_component;GO:0016020//membrane	GO:0005488//binding;GO:0003674//molecular_function;GO:0003824//catalytic activity	GO:0008150//biological_process;GO:0008152//metabolic process;GO:0050896//response to stimulus;GO:0006950//response to stress
Bra009226	10.6667	43.6667	1.24	5.13333	2.04956	1.04557e-06	3.5151e-05	yes	AT5G06780 (E=1e-125) | emsy N terminus domain-containing protein / ENT domain-containing protein	-	-	GO:0008152//metabolic process;GO:0008150//biological_process;GO:0009987//cellular process;GO:0009058//biosynthetic process;GO:0044238//primary metabolic process;GO:0071704//organic substance metabolic process;GO:0005975//carbohydrate metabolic process
Bra009228	10	0.333333	0.99	0.0266667	-5.21432	9.49004e-05	0.0018849	yes	AT5G06800 (E=2e-122) | myb family transcription factor	-	GO:0003677//DNA binding;GO:0003674//molecular_function;GO:0005488//binding;GO:0003676//nucleic acid binding;GO:1901363//heterocyclic compound binding;GO:0097159//organic cyclic compound binding;GO:0003682//chromatin binding;GO:0044877//macromolecular complex binding	-
Bra009234	558.333	210.333	60.2633	23.29	-1.37157	2.21839e-08	1.03162e-06	yes	AT5G06860 (E=8e-146) PGIP1, ATPGIP1 | PGIP1 (POLYGALACTURONASE INHIBITING PROTEIN 1); protein binding	-	GO:0005488//binding;GO:0005515//protein binding;GO:0003674//molecular_function	-
Bra009235	222.667	84.6667	23.8033	9.22333	-1.3678	3.02783e-06	9.07882e-05	yes	AT5G06860 (E=6e-138) PGIP1, ATPGIP1 | PGIP1 (POLYGALACTURONASE INHIBITING PROTEIN 1); protein binding	-	GO:0005488//binding;GO:0005515//protein binding;GO:0003674//molecular_function	-
Bra009236	39.3333	16	4.28	1.71333	-1.3208	0.000396474	0.00632242	yes	AT5G06860 (E=5e-138) PGIP1, ATPGIP1 | PGIP1 (POLYGALACTURONASE INHIBITING PROTEIN 1); protein binding	-	GO:0003674//molecular_function;GO:0005488//binding;GO:0005515//protein binding	-
Bra009237	44.6667	14.3333	4.75333	1.56667	-1.60124	0.00195666	0.0230933	yes	AT5G06860 (E=5e-136) PGIP1, ATPGIP1 | PGIP1 (POLYGALACTURONASE INHIBITING PROTEIN 1); protein binding	-	GO:0005515//protein binding;GO:0003674//molecular_function;GO:0005488//binding	-
Bra009246	52.3333	22.6667	6.75667	2.91667	-1.21199	0.000845599	0.0117316	yes	AT5G07680 (E=1e-129) ANAC080, ANAC079, ATNAC4 | ANAC080 (ARABIDOPSIS NAC DOMAIN CONTAINING PROTEIN 80); transcription factor	GO:0005622//intracellular;GO:0043231//intracellular membrane-bounded organelle;GO:0044464//cell part;GO:0044424//intracellular part;GO:0043226//organelle;GO:0043229//intracellular organelle;GO:0043227//membrane-bounded organelle;GO:0005575//cellular_component;GO:0005634//nucleus;GO:0005623//cell	GO:0097159//organic cyclic compound binding;GO:1901363//heterocyclic compound binding;GO:0003677//DNA binding;GO:0003674//molecular_function;GO:0005488//binding;GO:0003676//nucleic acid binding	GO:0008150//biological_process;GO:0034641//cellular nitrogen compound metabolic process;GO:0046483//heterocycle metabolic process;GO:0044238//primary metabolic process;GO:0044237//cellular metabolic process;GO:0006807//nitrogen compound metabolic process;GO:0071704//organic substance metabolic process;GO:0006725//cellular aromatic compound metabolic process;GO:0008152//metabolic process;GO:190136…
Bra009262	10.6667	47	1.76333	7.66667	2.12029	3.58422e-07	1.33502e-05	yes	AT5G07450 (E=1e-096) CYCP4;3 | CYCP4;3 (cyclin p4;3); cyclin-dependent protein kinase	-	GO:0005488//binding;GO:0005515//protein binding;GO:0003674//molecular_function	GO:0071704//organic substance metabolic process;GO:0032501//multicellular organismal process;GO:0043412//macromolecule modification;GO:0009791//post-embryonic development;GO:0009987//cellular process;GO:0007049//cell cycle;GO:0032502//developmental process;GO:0036211//protein modification process;GO:0044707//single-multicellular organism process;GO:0044238//primary metabolic process;GO:0044260//c…
Bra009271	28.3333	2.66667	2.42667	0.246667	-3.29834	2.53392e-07	9.77811e-06	yes	AT5G07320 (E=6e-120) | mitochondrial substrate carrier family protein	GO:0005575//cellular_component;GO:0016020//membrane	GO:0005488//binding;GO:0003674//molecular_function	GO:0008150//biological_process;GO:0009987//cellular process;GO:0051179//localization;GO:0051234//establishment of localization;GO:0006810//transport
Bra009272	17.3333	3.66667	2.49	0.543333	-2.19624	0.000942818	0.0128342	yes	AT5G07310 (E=4e-097) | AP2 domain-containing transcription factor, putative	GO:0043229//intracellular organelle;GO:0005575//cellular_component;GO:0005622//intracellular;GO:0005623//cell;GO:0043226//organelle;GO:0005634//nucleus;GO:0044464//cell part;GO:0043231//intracellular membrane-bounded organelle;GO:0043227//membrane-bounded organelle;GO:0044424//intracellular part	GO:0003677//DNA binding;GO:1901363//heterocyclic compound binding;GO:0003676//nucleic acid binding;GO:0001071//nucleic acid binding transcription factor activity;GO:0005488//binding;GO:0097159//organic cyclic compound binding;GO:0003674//molecular_function;GO:0003700//transcription factor activity, sequence-specific DNA binding	GO:0006725//cellular aromatic compound metabolic process;GO:0008150//biological_process;GO:0034641//cellular nitrogen compound metabolic process;GO:0044238//primary metabolic process;GO:0006139//nucleobase-containing compound metabolic process;GO:0071704//organic substance metabolic process;GO:0044237//cellular metabolic process;GO:0006807//nitrogen compound metabolic process;GO:0046483//heterocy…
Bra009284	0	64.3333	0.001	2.91333	11.5085	1.16847e-24	3.18398e-22	yes	AT5G07210 (E=8e-162) ARR21 | ARR21 (ARABIDOPSIS RESPONSE REGULATOR 21); transcription factor/ two-component response regulator	-	GO:0003677//DNA binding;GO:0044877//macromolecular complex binding;GO:0003682//chromatin binding;GO:0003676//nucleic acid binding;GO:0003674//molecular_function;GO:0005488//binding;GO:0097159//organic cyclic compound binding;GO:1901363//heterocyclic compound binding;GO:0004871//signal transducer activity	GO:0007165//signal transduction;GO:0046483//heterocycle metabolic process;GO:0044763//single-organism cellular process;GO:0034641//cellular nitrogen compound metabolic process;GO:0044699//single-organism process;GO:0050789//regulation of biological process;GO:1901360//organic cyclic compound metabolic process;GO:0008150//biological_process;GO:0050896//response to stimulus;GO:0006807//nitrogen com…
Bra009295	40.3333	146	4.8	17.6333	1.8772	1.25541e-10	8.70494e-09	yes	AT3G12480 (E=5e-077) NF-YC11 | NF-YC11 (NUCLEAR FACTOR Y, SUBUNIT C11); DNA binding / transcription factor	GO:0043231//intracellular membrane-bounded organelle;GO:0005622//intracellular;GO:0043229//intracellular organelle;GO:0005634//nucleus;GO:0044464//cell part;GO:0044424//intracellular part;GO:0043227//membrane-bounded organelle;GO:0005575//cellular_component;GO:0043226//organelle;GO:0005623//cell	GO:0005515//protein binding;GO:1901363//heterocyclic compound binding;GO:0003676//nucleic acid binding;GO:0097159//organic cyclic compound binding;GO:0003677//DNA binding;GO:0003674//molecular_function;GO:0005488//binding	-
Bra009305	12	33	0.966667	2.64667	1.45309	0.00152961	0.0189457	yes	AT5G07720 (E=1e-232) | galactosyl transferase GMA12/MNN10 family protein	GO:0005575//cellular_component;GO:0016020//membrane	GO:0003824//catalytic activity;GO:0016740//transferase activity;GO:0003674//molecular_function	GO:0071704//organic substance metabolic process;GO:0009987//cellular process;GO:0008152//metabolic process;GO:0044238//primary metabolic process;GO:0005975//carbohydrate metabolic process;GO:0008150//biological_process
Bra009307	16	0	0.733333	0.001	-9.51833	1.88804e-08	8.94055e-07	yes	AT2G25050 (E=3e-075) | formin homology 2 domain-containing protein / FH2 domain-containing protein	GO:0005623//cell;GO:0043226//organelle;GO:0043232//intracellular non-membrane-bounded organelle;GO:0005856//cytoskeleton;GO:0005622//intracellular;GO:0044424//intracellular part;GO:0043228//non-membrane-bounded organelle;GO:0043229//intracellular organelle;GO:0044464//cell part;GO:0005575//cellular_component	GO:0005488//binding;GO:0005515//protein binding;GO:0003674//molecular_function	GO:0071840//cellular component organization or biogenesis;GO:0008150//biological_process;GO:0009987//cellular process;GO:0016043//cellular component organization
Bra009309	3.33333	35	0.24	2.46667	3.36146	3.16257e-08	1.43839e-06	yes	AT5G07820 (E=1e-078) | FUNCTIONS IN: molecular_function unknown; INVOLVED IN: biological_process unknown; LOCATED IN: cellular_component unknown; EXPRESSED IN: 11 plant structures; EXPRESSED DURING: 8 growth stages; CONTAINS InterPro DOMAIN/s: Calmodulin-binding, plant (InterPro:IPR012417); BEST Arabidopsis thaliana protein match is: chromosome scaffold protein-related (TAIR:AT5G61260.1); Has 109…	-	GO:0005515//protein binding;GO:0003674//molecular_function;GO:0005488//binding	-
Bra009311	22	101.667	0.776667	3.54333	2.18974	2.20309e-11	1.71092e-09	yes	AT5G07890 (E=1e-135) | myosin heavy chain-related	-	GO:0005515//protein binding;GO:0003674//molecular_function;GO:0005488//binding	-
Bra009312	270	137.333	19.5433	9.6	-1.02557	0.00064674	0.00942323	yes	AT5G07990 (E=4e-244) TT7, CYP75B1, D501 | TT7 (TRANSPARENT TESTA 7); flavonoid 3'-monooxygenase/ oxygen binding	-	GO:0005488//binding;GO:0003674//molecular_function;GO:0003824//catalytic activity	GO:0009058//biosynthetic process;GO:0008150//biological_process;GO:0050896//response to stimulus;GO:0008152//metabolic process;GO:0009628//response to abiotic stimulus
Bra009316	0.666667	34	0.0633333	3.22333	5.66944	4.43288e-14	4.97122e-12	yes	AT5G08030 (E=2e-186) | glycerophosphoryl diester phosphodiesterase family protein	-	GO:0003824//catalytic activity;GO:0003674//molecular_function;GO:0016787//hydrolase activity	GO:0006629//lipid metabolic process;GO:0044699//single-organism process;GO:0009987//cellular process;GO:0071704//organic substance metabolic process;GO:0005975//carbohydrate metabolic process;GO:0008150//biological_process;GO:0044238//primary metabolic process;GO:0044710//single-organism metabolic process;GO:0008152//metabolic process
Bra009326	89.3333	253.333	8.75333	25.0267	1.51556	1.11514e-08	5.64182e-07	yes	AT5G08170 (E=3e-156) EMB1873, ATAIH | EMB1873 (EMBRYO DEFECTIVE 1873); agmatine deiminase	-	GO:0016787//hydrolase activity;GO:0003674//molecular_function;GO:0003824//catalytic activity	GO:0009058//biosynthetic process;GO:0009987//cellular process;GO:0008150//biological_process;GO:0008152//metabolic process
Bra009331	193.667	88.3333	29.2067	13.5367	-1.10943	5.82677e-06	0.00016248	yes	AT5G23140 (E=9e-109) CLPP2, NCLPP7 | NCLPP7 (NUCLEAR-ENCODED CLP PROTEASE P7); serine-type endopeptidase	-	GO:0003674//molecular_function;GO:0003824//catalytic activity;GO:0016787//hydrolase activity	GO:0043170//macromolecule metabolic process;GO:0008150//biological_process;GO:0008152//metabolic process;GO:0019538//protein metabolic process;GO:0044238//primary metabolic process;GO:0071704//organic substance metabolic process
Bra009338	9	27.3333	1.34	4.22333	1.65615	0.000888149	0.012224	yes	-	-	-	-
Bra009341	5.66667	30	0.563333	2.97	2.3984	2.72574e-05	0.000641458	yes	AT5G08460 (E=7e-170) | GDSL-motif lipase/hydrolase family protein	-	GO:0003824//catalytic activity;GO:0016787//hydrolase activity;GO:0003674//molecular_function	GO:1901360//organic cyclic compound metabolic process;GO:0008150//biological_process;GO:0008152//metabolic process;GO:0006629//lipid metabolic process;GO:0044238//primary metabolic process;GO:0044237//cellular metabolic process;GO:0046483//heterocycle metabolic process;GO:0009987//cellular process;GO:0009058//biosynthetic process;GO:0006725//cellular aromatic compound metabolic process;GO:0044699…
Bra009343	0	5	0.001	1.81	10.8218	0.000470416	0.00725572	yes	-	-	-	-
Bra009346	17.3333	51	2.13667	6.34	1.56912	2.22161e-05	0.000541696	yes	AT5G08520 (E=2e-115) | myb family transcription factor	GO:0005634//nucleus;GO:0044424//intracellular part;GO:0005575//cellular_component;GO:0043231//intracellular membrane-bounded organelle;GO:0043227//membrane-bounded organelle;GO:0043226//organelle;GO:0005623//cell;GO:0044464//cell part;GO:0043229//intracellular organelle;GO:0005622//intracellular	GO:0003674//molecular_function;GO:0005488//binding;GO:0097159//organic cyclic compound binding;GO:0003676//nucleic acid binding;GO:1901363//heterocyclic compound binding;GO:0003677//DNA binding;GO:0003682//chromatin binding;GO:0044877//macromolecular complex binding	-
Bra009360	248.297	99.6867	16.05	6.57	-1.28861	1.10986e-06	3.70716e-05	yes	AT5G08670 (E=3e-275) | ATP binding / hydrogen ion transporting ATP synthase, rotational mechanism	GO:0005575//cellular_component;GO:0043226//organelle;GO:0005622//intracellular;GO:0044424//intracellular part;GO:0044444//cytoplasmic part;GO:0005623//cell;GO:0005739//mitochondrion;GO:0016020//membrane;GO:0005737//cytoplasm;GO:0043229//intracellular organelle;GO:0044464//cell part;GO:0043231//intracellular membrane-bounded organelle;GO:0043227//membrane-bounded organelle	GO:0005215//transporter activity;GO:0016787//hydrolase activity;GO:0000166//nucleotide binding;GO:0005488//binding;GO:0003824//catalytic activity;GO:1901265//nucleoside phosphate binding;GO:0097159//organic cyclic compound binding;GO:0003674//molecular_function;GO:0036094//small molecule binding;GO:1901363//heterocyclic compound binding	GO:0034641//cellular nitrogen compound metabolic process;GO:0006807//nitrogen compound metabolic process;GO:0006725//cellular aromatic compound metabolic process;GO:0051179//localization;GO:0006810//transport;GO:1901360//organic cyclic compound metabolic process;GO:0071704//organic substance metabolic process;GO:0051234//establishment of localization;GO:0046483//heterocycle metabolic process;GO:0…
Bra009362	0	8.33333	0.001	0.97	9.92184	0.00142084	0.0178475	yes	-	-	-	-
Bra009365	66.6667	152	3.64333	8.25667	1.1803	4.19608e-05	0.00093105	yes	AT5G08730 (E=3e-124) | IBR domain-containing protein	-	GO:0003676//nucleic acid binding;GO:0016740//transferase activity;GO:1901363//heterocyclic compound binding;GO:0003674//molecular_function;GO:0097159//organic cyclic compound binding;GO:0003824//catalytic activity;GO:0005488//binding	GO:0019538//protein metabolic process;GO:0044238//primary metabolic process;GO:0071704//organic substance metabolic process;GO:0008150//biological_process;GO:0008152//metabolic process;GO:0044237//cellular metabolic process;GO:0009987//cellular process;GO:0044260//cellular macromolecule metabolic process;GO:0006464//cellular protein modification process;GO:0036211//protein modification process;GO…
Bra009369	4.66667	42.6667	0.406667	3.59333	3.1434	1.27822e-10	8.84337e-09	yes	AT5G08780 (E=3e-123) | histone H1/H5 family protein	GO:0005622//intracellular;GO:0043231//intracellular membrane-bounded organelle;GO:0005575//cellular_component;GO:0043229//intracellular organelle;GO:0043226//organelle;GO:0043227//membrane-bounded organelle;GO:0044464//cell part;GO:0005634//nucleus;GO:0005623//cell;GO:0044424//intracellular part	GO:0003677//DNA binding;GO:1901363//heterocyclic compound binding;GO:0097159//organic cyclic compound binding;GO:0003674//molecular_function;GO:0005488//binding;GO:0003676//nucleic acid binding	GO:0016043//cellular component organization;GO:0008150//biological_process;GO:0009987//cellular process;GO:0071840//cellular component organization or biogenesis
Bra009372	1.33333	9	0.44	3.19333	2.85949	0.00209557	0.0244816	yes	AT5G09250 (E=2e-053) KIWI | KIWI; DNA binding / protein binding / transcription coactivator	-	GO:0005488//binding;GO:0097159//organic cyclic compound binding;GO:0003676//nucleic acid binding;GO:1901363//heterocyclic compound binding;GO:0003674//molecular_function;GO:0003677//DNA binding	GO:0044238//primary metabolic process;GO:0034641//cellular nitrogen compound metabolic process;GO:0008150//biological_process;GO:0044237//cellular metabolic process;GO:0071704//organic substance metabolic process;GO:0009058//biosynthetic process;GO:0046483//heterocycle metabolic process;GO:1901360//organic cyclic compound metabolic process;GO:0006807//nitrogen compound metabolic process;GO:000998…
Bra009379	158.333	432.333	12.7067	34.5867	1.44463	6.07562e-10	3.8517e-08	yes	AT5G09330 (E=7e-138) anac082 | anac082 (Arabidopsis NAC domain containing protein 82); transcription factor	GO:0005575//cellular_component;GO:0043231//intracellular membrane-bounded organelle;GO:0043227//membrane-bounded organelle;GO:0005634//nucleus;GO:0043229//intracellular organelle;GO:0043226//organelle;GO:0005623//cell;GO:0044464//cell part;GO:0044424//intracellular part;GO:0005622//intracellular	GO:1901363//heterocyclic compound binding;GO:0005488//binding;GO:0003677//DNA binding;GO:0097159//organic cyclic compound binding;GO:0003674//molecular_function;GO:0003676//nucleic acid binding	GO:0044238//primary metabolic process;GO:0009058//biosynthetic process;GO:0034641//cellular nitrogen compound metabolic process;GO:0008150//biological_process;GO:0006139//nucleobase-containing compound metabolic process;GO:1901360//organic cyclic compound metabolic process;GO:0009987//cellular process;GO:0008152//metabolic process;GO:0044237//cellular metabolic process;GO:0046483//heterocycle met…
Bra009384	92.3333	228.333	11.1433	28.2	1.33951	7.21129e-07	2.53981e-05	yes	-	-	-	-
Bra009388	85.3333	576.667	12.7567	83.4667	2.70995	1.76591e-07	7.06911e-06	yes	-	-	-	-
Bra009389	25.6667	111	3.23333	13.67	2.07992	1.06448e-10	7.48122e-09	yes	-	-	-	-
Bra009392	214	557.333	36.5433	96.0467	1.39413	2.40152e-11	1.86037e-09	yes	AT4G32210 (E=2e-079) SDH3-2 | SDH3-2; succinate dehydrogenase	-	GO:0003674//molecular_function;GO:0003824//catalytic activity	-
Bra009400	42	15.0967	2.80667	1.01	-1.4745	0.000243785	0.00420018	yes	AT5G09760 (E=4e-240) | pectinesterase family protein	GO:0044464//cell part;GO:0005575//cellular_component;GO:0005623//cell;GO:0005618//cell wall;GO:0030312//external encapsulating structure;GO:0071944//cell periphery	GO:0003674//molecular_function;GO:0003824//catalytic activity;GO:0098772//molecular function regulator;GO:0016787//hydrolase activity;GO:0030234//enzyme regulator activity	GO:0071840//cellular component organization or biogenesis;GO:0005975//carbohydrate metabolic process;GO:0008150//biological_process;GO:0008152//metabolic process;GO:0016043//cellular component organization;GO:0071704//organic substance metabolic process;GO:0009987//cellular process;GO:0009056//catabolic process;GO:0044238//primary metabolic process
Bra009409	88.6667	220.183	4.83333	11.9233	1.3027	7.45561e-09	3.95899e-07	yes	AT5G04940 (E=1e-273) SUVH1 | SUVH1 (SU(VAR)3-9 HOMOLOG 1); histone methyltransferase	GO:0043226//organelle;GO:0005622//intracellular;GO:0043227//membrane-bounded organelle;GO:0005623//cell;GO:0044424//intracellular part;GO:0005634//nucleus;GO:0044464//cell part;GO:0005575//cellular_component;GO:0043231//intracellular membrane-bounded organelle;GO:0043229//intracellular organelle	GO:0005488//binding;GO:0003674//molecular_function;GO:0005515//protein binding;GO:0003824//catalytic activity;GO:0016740//transferase activity	GO:0071840//cellular component organization or biogenesis;GO:0016043//cellular component organization;GO:0044237//cellular metabolic process;GO:0008150//biological_process;GO:0006464//cellular protein modification process;GO:0071704//organic substance metabolic process;GO:0043170//macromolecule metabolic process;GO:0043412//macromolecule modification;GO:0044267//cellular protein metabolic process…
Bra009421	408	142.667	20.0367	6.98	-1.52134	5.13494e-13	4.93844e-11	yes	-	-	-	-
Bra009435	77	12.6667	5.23333	0.85	-2.6222	3.23353e-12	2.75952e-10	yes	AT5G04710 (E=1e-262) | aspartyl aminopeptidase, putative	GO:0005622//intracellular;GO:0043226//organelle;GO:0005575//cellular_component;GO:0043227//membrane-bounded organelle;GO:0009536//plastid;GO:0044444//cytoplasmic part;GO:0044464//cell part;GO:0005623//cell;GO:0043229//intracellular organelle;GO:0043231//intracellular membrane-bounded organelle;GO:0005737//cytoplasm;GO:0044424//intracellular part	GO:0003674//molecular_function;GO:0016787//hydrolase activity;GO:0003824//catalytic activity;GO:0005488//binding	GO:0008152//metabolic process;GO:0044238//primary metabolic process;GO:0071704//organic substance metabolic process;GO:0008150//biological_process;GO:0043170//macromolecule metabolic process;GO:0019538//protein metabolic process
Bra009448	1068.33	2219	49.8467	104.33	1.06559	5.20486e-06	0.000146056	yes	AT5G04500 (E=0.0) | glycosyltransferase family protein 47	GO:0044424//intracellular part;GO:0044464//cell part;GO:0016020//membrane;GO:0012505//endomembrane system;GO:0043229//intracellular organelle;GO:0005783//endoplasmic reticulum;GO:0005737//cytoplasm;GO:0044444//cytoplasmic part;GO:0005623//cell;GO:0043231//intracellular membrane-bounded organelle;GO:0043226//organelle;GO:0043227//membrane-bounded organelle;GO:0005622//intracellular;GO:0005575//cel…	GO:0016740//transferase activity;GO:0003824//catalytic activity;GO:0003674//molecular_function	GO:0044238//primary metabolic process;GO:0043170//macromolecule metabolic process;GO:0009058//biosynthetic process;GO:0008150//biological_process;GO:0008152//metabolic process;GO:0019538//protein metabolic process;GO:0009987//cellular process;GO:0071704//organic substance metabolic process
Bra009469	3.66667	13.3333	0.25	0.946667	1.92093	0.00430693	0.0432839	yes	AT5G04310 (E=9e-226) | pectate lyase family protein	-	GO:0005488//binding;GO:0003674//molecular_function;GO:0003824//catalytic activity	GO:0008150//biological_process;GO:0009056//catabolic process;GO:0071704//organic substance metabolic process;GO:0008152//metabolic process;GO:0005975//carbohydrate metabolic process;GO:0044238//primary metabolic process
Bra009471	73.6667	16.3333	9.73333	2.08667	-2.22173	4.49986e-09	2.49614e-07	yes	AT5G04270 (E=7e-119) | zinc ion binding	GO:0005575//cellular_component;GO:0016020//membrane	GO:0005488//binding;GO:0016740//transferase activity;GO:0003674//molecular_function;GO:0003824//catalytic activity	-
Bra009473	14	45.6667	1.48	4.60333	1.63708	0.000160261	0.00293534	yes	AT5G04250 (E=1e-055) | OTU-like cysteine protease family protein	-	-	GO:0008152//metabolic process;GO:0009058//biosynthetic process;GO:0009607//response to biotic stimulus;GO:0006950//response to stress;GO:0009605//response to external stimulus;GO:0009719//response to endogenous stimulus;GO:0050896//response to stimulus;GO:0009628//response to abiotic stimulus;GO:0009987//cellular process;GO:0008150//biological_process
Bra009494	217.667	533.333	19.5967	48.3633	1.30331	1.71994e-06	5.53088e-05	yes	AT5G04010 (E=5e-061) | unknown protein	-	GO:0003674//molecular_function;GO:0005488//binding;GO:0005515//protein binding	-
Bra009495	3.66667	15.3333	0.403333	1.69667	2.07266	0.000634262	0.00928061	yes	-	-	-	-
Bra009510	5.66667	0	0.903333	0.001	-9.81911	0.000664949	0.00964782	yes	AT5G03790 (E=1e-095) ATHB51, LMI1, HB51 | HB51; DNA binding / sequence-specific DNA binding / transcription factor	GO:0005575//cellular_component;GO:0043226//organelle;GO:0005622//intracellular;GO:0005623//cell;GO:0044464//cell part;GO:0043227//membrane-bounded organelle;GO:0044424//intracellular part;GO:0043229//intracellular organelle;GO:0005634//nucleus;GO:0043231//intracellular membrane-bounded organelle	GO:0097159//organic cyclic compound binding;GO:0003674//molecular_function;GO:0005488//binding;GO:1901363//heterocyclic compound binding;GO:0003677//DNA binding;GO:0003676//nucleic acid binding;GO:0001071//nucleic acid binding transcription factor activity;GO:0003700//transcription factor activity, sequence-specific DNA binding	GO:0046483//heterocycle metabolic process;GO:1901360//organic cyclic compound metabolic process;GO:0034641//cellular nitrogen compound metabolic process;GO:0044237//cellular metabolic process;GO:0008150//biological_process;GO:0009987//cellular process;GO:0006725//cellular aromatic compound metabolic process;GO:0006807//nitrogen compound metabolic process;GO:0071704//organic substance metabolic pr…
Bra009511	46.3333	16	3.69333	1.28333	-1.52503	2.25111e-05	0.00054803	yes	AT5G03770 (E=3e-211) | 3-deoxy-D-manno-octulosonic acid transferase-related	-	-	GO:0000003//reproduction;GO:0009791//post-embryonic development;GO:0032501//multicellular organismal process;GO:0044699//single-organism process;GO:0009058//biosynthetic process;GO:0044707//single-multicellular organism process;GO:0032502//developmental process;GO:0009056//catabolic process;GO:0009987//cellular process;GO:0050896//response to stimulus;GO:0044767//single-organism developmental pro…
Bra009513	95.6667	413.667	9.59333	41.5167	2.11359	3.40745e-22	7.89919e-20	yes	AT5G03740 (E=2e-031) HD2C, HDT3 | HD2C (HISTONE DEACETYLASE 2C); histone deacetylase/ nucleic acid binding / transcription repressor/ zinc ion binding	GO:0043233//organelle lumen;GO:0005730//nucleolus;GO:0005575//cellular_component;GO:0044422//organelle part;GO:0043228//non-membrane-bounded organelle;GO:0044464//cell part;GO:0005622//intracellular;GO:0043232//intracellular non-membrane-bounded organelle;GO:0044428//nuclear part;GO:0005634//nucleus;GO:0031981//nuclear lumen;GO:0043227//membrane-bounded organelle;GO:0043226//organelle;GO:0043231/…	GO:0005488//binding;GO:0003674//molecular_function	GO:0044238//primary metabolic process;GO:0036211//protein modification process;GO:0009987//cellular process;GO:0032501//multicellular organismal process;GO:0006464//cellular protein modification process;GO:0044707//single-multicellular organism process;GO:0044267//cellular protein metabolic process;GO:0009628//response to abiotic stimulus;GO:0044260//cellular macromolecule metabolic process;GO:00…
Bra009521	378.333	189.667	16.3767	8.04	-1.02637	4.09924e-05	0.000913918	yes	AT5G03650 (E=0.0) SBE2.2 | SBE2.2 (starch branching enzyme 2.2); 1,4-alpha-glucan branching enzyme	GO:0005623//cell;GO:0044424//intracellular part;GO:0005622//intracellular;GO:0043226//organelle;GO:0009536//plastid;GO:0005737//cytoplasm;GO:0005575//cellular_component;GO:0043231//intracellular membrane-bounded organelle;GO:0043227//membrane-bounded organelle;GO:0044464//cell part;GO:0043229//intracellular organelle;GO:0044444//cytoplasmic part	GO:0003824//catalytic activity;GO:0016740//transferase activity;GO:0003674//molecular_function;GO:0016787//hydrolase activity;GO:0005488//binding	GO:0006091//generation of precursor metabolites and energy;GO:0034641//cellular nitrogen compound metabolic process;GO:0044238//primary metabolic process;GO:0006807//nitrogen compound metabolic process;GO:0046483//heterocycle metabolic process;GO:0071704//organic substance metabolic process;GO:0044710//single-organism metabolic process;GO:0044699//single-organism process;GO:0006725//cellular arom…
Bra009562	54.3333	18.3333	6.28	2.08	-1.59418	2.82657e-05	0.000661178	yes	AT5G02840 (E=7e-099) LCL1 | LCL1 (LHY/CCA1-like 1); DNA binding / transcription factor	-	GO:0003674//molecular_function;GO:0044877//macromolecular complex binding;GO:0097159//organic cyclic compound binding;GO:0005488//binding;GO:0003682//chromatin binding;GO:0003676//nucleic acid binding;GO:1901363//heterocyclic compound binding;GO:0003677//DNA binding	-
Bra009584	743.03	329.71	48.63	21.3133	-1.19009	0.00142785	0.0179138	yes	AT5G02500 (E=5e-166) HSC70-1, HSP70-1, AT-HSC70-1, HSC70 | HSC70-1 (HEAT SHOCK COGNATE PROTEIN 70-1); ATP binding	-	GO:0005488//binding;GO:1901265//nucleoside phosphate binding;GO:0003674//molecular_function;GO:0097159//organic cyclic compound binding;GO:0036094//small molecule binding;GO:1901363//heterocyclic compound binding;GO:0000166//nucleotide binding	-
Bra009596	14	2.66667	0.863333	0.16	-2.43185	0.00101199	0.0135667	yes	AT5G02370 (E=1e-251) | kinesin motor protein-related	GO:0005856//cytoskeleton;GO:0005622//intracellular;GO:0005623//cell;GO:0005575//cellular_component;GO:0044424//intracellular part;GO:0043232//intracellular non-membrane-bounded organelle;GO:0043226//organelle;GO:0043228//non-membrane-bounded organelle;GO:0044464//cell part;GO:0043229//intracellular organelle	GO:0000166//nucleotide binding;GO:0005488//binding;GO:1901265//nucleoside phosphate binding;GO:1901363//heterocyclic compound binding;GO:0016817//hydrolase activity, acting on acid anhydrides;GO:0003824//catalytic activity;GO:0003774//motor activity;GO:0016818//hydrolase activity, acting on acid anhydrides, in phosphorus-containing anhydrides;GO:0036094//small molecule binding;GO:0016462//pyropho…	GO:0008150//biological_process;GO:0009987//cellular process
Bra009605	57.6667	139.333	7.27	18.47	1.34516	0.000555344	0.00831383	yes	AT5G02230 (E=3e-135) | haloacid dehalogenase-like hydrolase family protein	-	GO:0016787//hydrolase activity;GO:0003674//molecular_function;GO:0003824//catalytic activity	GO:0008152//metabolic process;GO:0008150//biological_process
Bra009611	75.6667	28.3333	6.62	2.44333	-1.43798	0.000197447	0.00350085	yes	AT5G02130 (E=8e-152) NDP1 | NDP1 (RANDOM POTATO CDNA CLONE); binding	-	GO:0003674//molecular_function;GO:0005488//binding;GO:0005515//protein binding	-
Bra009626	57.3333	5	3.17	0.296667	-3.41757	2.41084e-13	2.41582e-11	yes	-	-	-	-
Bra009640	43	9.66667	3.03333	0.683333	-2.15024	7.27567e-07	2.55669e-05	yes	AT5G01490 (E=4e-099) CAX4, ATCAX4 | CAX4 (CATION EXCHANGER 4); calcium:cation antiporter/ calcium:hydrogen antiporter/ cation:cation antiporter	GO:0005737//cytoplasm;GO:0043227//membrane-bounded organelle;GO:0005622//intracellular;GO:0005575//cellular_component;GO:0044424//intracellular part;GO:0043226//organelle;GO:0043231//intracellular membrane-bounded organelle;GO:0044444//cytoplasmic part;GO:0005623//cell;GO:0044464//cell part;GO:0005773//vacuole;GO:0043229//intracellular organelle;GO:0016020//membrane	GO:0003674//molecular_function;GO:0005215//transporter activity	GO:0065007//biological regulation;GO:0009987//cellular process;GO:0044707//single-multicellular organism process;GO:0019725//cellular homeostasis;GO:0032501//multicellular organismal process;GO:0008150//biological_process;GO:0051234//establishment of localization;GO:0009991//response to extracellular stimulus;GO:0032502//developmental process;GO:0050896//response to stimulus;GO:0009607//response …
Bra009656	36.3333	8.33333	8.69667	1.99333	-2.12528	6.74938e-06	0.000185542	yes	-	-	-	-
Bra009657	986	451.467	64.52	29.8	-1.11443	2.53913e-08	1.172e-06	yes	AT2G17200 (E=6e-206) | ubiquitin family protein	-	GO:0005515//protein binding;GO:0005488//binding;GO:0003674//molecular_function	-
Bra009662	17.3333	122	4.87667	35.3533	2.85788	1.17755e-08	5.93347e-07	yes	AT5G66110 (E=4e-054) | metal ion binding	GO:0016020//membrane;GO:0071944//cell periphery;GO:0044464//cell part;GO:0005623//cell;GO:0005886//plasma membrane;GO:0005575//cellular_component	GO:0005488//binding;GO:0003674//molecular_function	GO:0008150//biological_process;GO:0051179//localization;GO:0006810//transport;GO:0051234//establishment of localization
Bra009679	68	20.3333	15.0567	4.48333	-1.74776	3.13685e-07	1.17827e-05	yes	AT5G23395 (E=1e-049) | FUNCTIONS IN: molecular_function unknown; INVOLVED IN: biological_process unknown; LOCATED IN: chloroplast; CONTAINS InterPro DOMAIN/s: CHCH (InterPro:IPR010625); Has 224 Blast hits to 224 proteins in 106 species: Archae - 0; Bacteria - 0; Metazoa - 109; Fungi - 94; Plants - 20; Viruses - 0; Other Eukaryotes - 1 (source: NCBI BLink).	GO:0005777//peroxisome;GO:0005622//intracellular;GO:0043227//membrane-bounded organelle;GO:0042579//microbody;GO:0005575//cellular_component;GO:0043226//organelle;GO:0044444//cytoplasmic part;GO:0005737//cytoplasm;GO:0005739//mitochondrion;GO:0043231//intracellular membrane-bounded organelle;GO:0043229//intracellular organelle;GO:0044464//cell part;GO:0044424//intracellular part;GO:0005623//cell	-	GO:0016043//cellular component organization;GO:0051234//establishment of localization;GO:0008150//biological_process;GO:0006810//transport;GO:0009987//cellular process;GO:0071840//cellular component organization or biogenesis;GO:0051179//localization
Bra009683	71.3333	183.667	2.84333	7.34	1.3682	7.48855e-09	3.9697e-07	yes	AT5G23430 (E=0.0) | transducin family protein / WD-40 repeat family protein	GO:0044464//cell part;GO:0043226//organelle;GO:0005622//intracellular;GO:0005737//cytoplasm;GO:0005575//cellular_component;GO:0043232//intracellular non-membrane-bounded organelle;GO:0044424//intracellular part;GO:0005856//cytoskeleton;GO:0043228//non-membrane-bounded organelle;GO:0043229//intracellular organelle;GO:0005623//cell	GO:0003674//molecular_function;GO:0005515//protein binding;GO:0005488//binding	GO:0009987//cellular process;GO:0008150//biological_process
Bra009707	191.667	15	33.96	2.62333	-3.69436	2.29265e-32	1.16752e-29	yes	-	-	-	-
Bra009714	5.66667	0	0.313333	0.001	-8.29155	0.000137252	0.0025793	yes	AT5G23910 (E=4e-090) | ATP binding / microtubule motor	GO:0043232//intracellular non-membrane-bounded organelle;GO:0044424//intracellular part;GO:0005856//cytoskeleton;GO:0044464//cell part;GO:0043229//intracellular organelle;GO:0005623//cell;GO:0005575//cellular_component;GO:0043228//non-membrane-bounded organelle;GO:0005622//intracellular;GO:0043226//organelle	GO:0036094//small molecule binding;GO:0016462//pyrophosphatase activity;GO:0003676//nucleic acid binding;GO:0003824//catalytic activity;GO:1901265//nucleoside phosphate binding;GO:0005515//protein binding;GO:0003677//DNA binding;GO:0003674//molecular_function;GO:0097159//organic cyclic compound binding;GO:0005488//binding;GO:0003774//motor activity;GO:0017111//nucleoside-triphosphatase activity;G…	GO:0006950//response to stress;GO:0090304//nucleic acid metabolic process;GO:0044238//primary metabolic process;GO:0034641//cellular nitrogen compound metabolic process;GO:0046483//heterocycle metabolic process;GO:0050896//response to stimulus;GO:0008150//biological_process;GO:0009987//cellular process;GO:1901360//organic cyclic compound metabolic process;GO:0044237//cellular metabolic process;GO…
Bra009716	86	14.3333	6.72667	1.14667	-2.55245	2.09696e-13	2.13574e-11	yes	AT5G23940 (E=7e-226) EMB3009 | EMB3009 (embryo defective 3009); transferase/ transferase, transferring acyl groups other than amino-acyl groups	-	GO:0003674//molecular_function;GO:0016740//transferase activity;GO:0003824//catalytic activity	-
Bra009724	109.667	44	6.14333	2.53333	-1.27798	5.03065e-05	0.00109205	yes	AT5G24030 (E=2e-279) SLAH3 | SLAH3 (SLAC1 HOMOLOGUE 3); transporter	GO:0016020//membrane;GO:0005575//cellular_component	GO:0003674//molecular_function;GO:0005215//transporter activity	GO:0008150//biological_process;GO:0044763//single-organism cellular process;GO:0065007//biological regulation;GO:0051179//localization;GO:0051234//establishment of localization;GO:0006810//transport;GO:0044699//single-organism process;GO:0042592//homeostatic process;GO:0009987//cellular process;GO:0065008//regulation of biological quality;GO:0019725//cellular homeostasis
Bra009726	5.33333	0	0.913333	0.001	-9.835	0.000705196	0.0101395	yes	-	-	-	-
Bra009727	4.66667	0	1.36667	0.001	-10.4164	0.00060002	0.00888419	yes	-	-	-	-
Bra009735	81.6667	30	5.86	2.11333	-1.47138	3.38851e-05	0.000770576	yes	AT5G24120 (E=3e-179) SIGE, SIG5, ATSIG5 | SIGE (SIGMA FACTOR E); DNA binding / DNA-directed RNA polymerase/ sigma factor/ transcription factor	-	GO:0003674//molecular_function;GO:0001071//nucleic acid binding transcription factor activity;GO:0003700//transcription factor activity, sequence-specific DNA binding;GO:0005488//binding;GO:0003676//nucleic acid binding;GO:1901363//heterocyclic compound binding;GO:0097159//organic cyclic compound binding;GO:0003677//DNA binding	GO:0071704//organic substance metabolic process;GO:0044238//primary metabolic process;GO:0044237//cellular metabolic process;GO:0006139//nucleobase-containing compound metabolic process;GO:0034641//cellular nitrogen compound metabolic process;GO:0009058//biosynthetic process;GO:0006807//nitrogen compound metabolic process;GO:0046483//heterocycle metabolic process;GO:0009987//cellular process;GO:1…
Bra009737	0	5.66667	0.001	0.426667	8.73697	0.000822556	0.0114788	yes	AT5G24140 (E=2e-206) SQP2 | SQP2; FAD binding / oxidoreductase/ squalene monooxygenase	GO:0005575//cellular_component;GO:0016020//membrane	GO:0003824//catalytic activity;GO:0036094//small molecule binding;GO:0000166//nucleotide binding;GO:0005488//binding;GO:1901265//nucleoside phosphate binding;GO:1901363//heterocyclic compound binding;GO:0003674//molecular_function;GO:0097159//organic cyclic compound binding	GO:0008150//biological_process;GO:0008152//metabolic process
Bra009746	9.33333	0.666667	0.68	0.0466667	-3.86507	0.000742678	0.0106023	yes	AT5G24290 (E=1e-064) | integral membrane family protein	GO:0005575//cellular_component;GO:0005623//cell;GO:0044464//cell part;GO:0005622//intracellular	GO:0005488//binding;GO:0005515//protein binding;GO:0003674//molecular_function;GO:0005215//transporter activity	GO:0008150//biological_process;GO:0006810//transport;GO:0051179//localization;GO:0009987//cellular process;GO:0051234//establishment of localization
Bra009756	20.3333	4	1.13667	0.213333	-2.41363	0.00238604	0.0273203	yes	AT5G24380 (E=0.0) YSL2, ATYSL2 | YSL2 (YELLOW STRIPE LIKE 2); oligopeptide transporter	GO:0005886//plasma membrane;GO:0005623//cell;GO:0071944//cell periphery;GO:0016020//membrane;GO:0005575//cellular_component;GO:0044464//cell part	-	GO:0009987//cellular process;GO:0051234//establishment of localization;GO:0006810//transport;GO:0008150//biological_process;GO:0051179//localization
Bra009762	15	0	1.69333	0.001	-10.7257	2.59891e-09	1.49505e-07	yes	-	-	-	-
Bra009770	144.667	9	15.5433	0.966667	-4.00713	1.24365e-30	5.76607e-28	yes	AT5G24520 (E=1e-176) TTG1, TTG | TTG1 (TRANSPARENT TESTA GLABRA 1); DNA binding / nucleotide binding / protein binding	GO:0043227//membrane-bounded organelle;GO:0044464//cell part;GO:0043229//intracellular organelle;GO:0043226//organelle;GO:0005634//nucleus;GO:0005737//cytoplasm;GO:0044424//intracellular part;GO:0043231//intracellular membrane-bounded organelle;GO:0005575//cellular_component;GO:0005623//cell;GO:0005622//intracellular	GO:0003674//molecular_function;GO:1901363//heterocyclic compound binding;GO:0003676//nucleic acid binding;GO:0003677//DNA binding;GO:0005488//binding;GO:0097159//organic cyclic compound binding;GO:0005515//protein binding	GO:0008150//biological_process;GO:0044767//single-organism developmental process;GO:0044699//single-organism process;GO:0044763//single-organism cellular process;GO:0044707//single-multicellular organism process;GO:0007275//multicellular organism development;GO:0032501//multicellular organismal process;GO:0048869//cellular developmental process;GO:0030154//cell differentiation;GO:0009987//cellula…
Bra009776	120.333	30.6667	28.99	7.52	-1.94675	1.3677e-09	8.23378e-08	yes	-	-	-	-
Bra009777	400.667	53.6667	36.1567	4.87667	-2.89029	4.36845e-33	2.30002e-30	yes	-	-	-	-
Bra009796	31	84.3333	1.96667	5.18333	1.39813	0.000503463	0.00769501	yes	AT5G24830 (E=3e-263) | pentatricopeptide (PPR) repeat-containing protein	-	-	GO:0090304//nucleic acid metabolic process;GO:0008150//biological_process;GO:0071704//organic substance metabolic process;GO:1901360//organic cyclic compound metabolic process;GO:0006259//DNA metabolic process;GO:0008152//metabolic process;GO:0043170//macromolecule metabolic process;GO:0006139//nucleobase-containing compound metabolic process;GO:0044238//primary metabolic process;GO:0044699//sing…
Bra009803	38	12.3333	2.57333	0.853333	-1.59246	7.61599e-05	0.00155955	yes	AT5G24910 (E=2e-286) CYP714A1 | CYP714A1; electron carrier/ heme binding / iron ion binding / monooxygenase/ oxygen binding	-	GO:0005488//binding;GO:0003674//molecular_function;GO:0003824//catalytic activity	GO:0008150//biological_process;GO:0044699//single-organism process;GO:0071704//organic substance metabolic process;GO:0009058//biosynthetic process;GO:0044710//single-organism metabolic process;GO:0006629//lipid metabolic process;GO:0008152//metabolic process;GO:0044238//primary metabolic process
Bra009810	90.3333	6.66667	6.56667	0.5	-3.71516	3.3582e-17	4.89761e-15	yes	AT5G25050 (E=2e-242) | integral membrane transporter family protein	GO:0016020//membrane;GO:0005575//cellular_component	-	GO:0051179//localization;GO:0051234//establishment of localization;GO:0006810//transport;GO:0008150//biological_process
Bra009817	14.3333	0	1.05	0.001	-10.0362	2.82074e-09	1.60777e-07	yes	AT5G25120 (E=2e-234) CYP71B11 | CYP71B11; electron carrier/ heme binding / iron ion binding / monooxygenase/ oxygen binding	-	GO:0003824//catalytic activity;GO:0005488//binding;GO:0003674//molecular_function	GO:0008152//metabolic process;GO:0008150//biological_process
Bra009830	449.667	155.667	15.55	5.28667	-1.55648	1.24303e-12	1.12249e-10	yes	AT5G11110 (E=0.0) SPS1, ATSPS2F, KNS2 | ATSPS2F (SUCROSE PHOSPHATE SYNTHASE 2F); sucrose-phosphate synthase	-	GO:0016740//transferase activity;GO:0003824//catalytic activity;GO:0003674//molecular_function	GO:0071704//organic substance metabolic process;GO:0044238//primary metabolic process;GO:0008152//metabolic process;GO:0005975//carbohydrate metabolic process;GO:0009058//biosynthetic process;GO:0008150//biological_process;GO:0009987//cellular process
Bra009845	5.66667	0.333333	0.526667	0.0266667	-4.30378	0.0012983	0.0165726	yes	-	-	-	-
Bra009854	8.33333	1.33333	0.81	0.116667	-2.79553	0.00512005	0.049471	yes	-	-	-	-
Bra009861	23	6.33333	0.86	0.24	-1.8413	0.00169191	0.0205062	yes	-	-	-	-
Bra009866	36.6667	3.33333	2.21667	0.22	-3.33282	8.44718e-09	4.41014e-07	yes	AT5G25880 (E=0.0) ATNADP-ME3 | ATNADP-ME3 (NADP-malic enzyme 3); malate dehydrogenase (oxaloacetate-decarboxylating) (NADP+)/ malic enzyme/ oxidoreductase, acting on NADH or NADPH, NAD or NADP as acceptor	GO:0005829//cytosol;GO:0005575//cellular_component;GO:0044424//intracellular part;GO:0005737//cytoplasm;GO:0005622//intracellular;GO:0044444//cytoplasmic part;GO:0044464//cell part;GO:0005623//cell	GO:0097159//organic cyclic compound binding;GO:1901265//nucleoside phosphate binding;GO:0003824//catalytic activity;GO:0036094//small molecule binding;GO:0000166//nucleotide binding;GO:0003674//molecular_function;GO:0005488//binding;GO:1901363//heterocyclic compound binding	GO:0043170//macromolecule metabolic process;GO:0051704//multi-organism process;GO:0044238//primary metabolic process;GO:0044706//multi-multicellular organism process;GO:0071840//cellular component organization or biogenesis;GO:0009056//catabolic process;GO:0030154//cell differentiation;GO:0009653//anatomical structure morphogenesis;GO:0009058//biosynthetic process;GO:0019538//protein metabolic pr…
Bra009869	31.3333	8	1.11667	0.3	-1.89616	0.000240792	0.00415323	yes	AT5G25930 (E=0.0) | leucine-rich repeat family protein / protein kinase family protein	GO:0016020//membrane;GO:0005575//cellular_component	GO:0005488//binding;GO:0097159//organic cyclic compound binding;GO:0003824//catalytic activity;GO:0016772//transferase activity, transferring phosphorus-containing groups;GO:0016740//transferase activity;GO:1901265//nucleoside phosphate binding;GO:1901363//heterocyclic compound binding;GO:0000166//nucleotide binding;GO:0016301//kinase activity;GO:0003674//molecular_function;GO:0036094//small mole…	GO:0044267//cellular protein metabolic process;GO:0071704//organic substance metabolic process;GO:0006464//cellular protein modification process;GO:0044238//primary metabolic process;GO:0036211//protein modification process;GO:0044260//cellular macromolecule metabolic process;GO:0009987//cellular process;GO:0043170//macromolecule metabolic process;GO:0008150//biological_process;GO:0043412//macrom…
Bra009886	53	10	5.74	1.10333	-2.37918	1.01827e-06	3.44738e-05	yes	AT5G26200 (E=3e-153) | mitochondrial substrate carrier family protein	GO:0005575//cellular_component;GO:0016020//membrane	-	GO:0009987//cellular process;GO:0008150//biological_process;GO:0051234//establishment of localization;GO:0051179//localization;GO:0006810//transport
Bra009895	17.3333	3.33333	1.8	0.303333	-2.56902	0.000585727	0.00869328	yes	AT5G26280 (E=4e-168) | meprin and TRAF homology domain-containing protein / MATH domain-containing protein	-	GO:0005515//protein binding;GO:0005488//binding;GO:0003674//molecular_function	-
Bra009906	0	3.66667	0.001	0.4	8.64386	0.00324791	0.0348749	yes	AT3G05920 (E=1e-024) | heavy-metal-associated domain-containing protein	-	GO:0005488//binding;GO:0003674//molecular_function	GO:0006810//transport;GO:0051234//establishment of localization;GO:0008150//biological_process;GO:0051179//localization
Bra009924	58	146	2.23667	5.66667	1.34115	1.68962e-06	5.44464e-05	yes	AT5G26860 (E=0.0) LON_ARA_ARA, LON1 | LON1 (LON PROTEASE 1); ATP binding / ATP-dependent peptidase/ serine-type peptidase	GO:0005739//mitochondrion;GO:0043229//intracellular organelle;GO:0005575//cellular_component;GO:0044464//cell part;GO:0044444//cytoplasmic part;GO:0043227//membrane-bounded organelle;GO:0005623//cell;GO:0005622//intracellular;GO:0043231//intracellular membrane-bounded organelle;GO:0005737//cytoplasm;GO:0043226//organelle;GO:0044424//intracellular part	GO:0036094//small molecule binding;GO:0003677//DNA binding;GO:0003824//catalytic activity;GO:0016787//hydrolase activity;GO:1901363//heterocyclic compound binding;GO:0005488//binding;GO:0003674//molecular_function;GO:0000166//nucleotide binding;GO:1901265//nucleoside phosphate binding;GO:0003676//nucleic acid binding;GO:0097159//organic cyclic compound binding	GO:1901360//organic cyclic compound metabolic process;GO:0009056//catabolic process;GO:0044238//primary metabolic process;GO:0006725//cellular aromatic compound metabolic process;GO:0071840//cellular component organization or biogenesis;GO:0050896//response to stimulus;GO:0006807//nitrogen compound metabolic process;GO:0044237//cellular metabolic process;GO:0034641//cellular nitrogen compound met…
Bra009933	32.3333	96.6667	2.93333	8.43333	1.52356	6.9083e-05	0.00143641	yes	AT2G43270 (E=5e-076) | F-box family protein	-	GO:0005515//protein binding;GO:0005488//binding;GO:0003674//molecular_function	-
Bra009948	11.3333	0.666667	0.46	0.03	-3.9386	5.80828e-05	0.00123895	yes	AT5G27680 (E=9e-168) RECQSIM | RECQSIM (Arabidopsis RecQ helicase sim); ATP binding / ATP-dependent helicase/ helicase/ nucleic acid binding	-	GO:0003676//nucleic acid binding;GO:1901265//nucleoside phosphate binding;GO:0097159//organic cyclic compound binding;GO:0000166//nucleotide binding;GO:0003824//catalytic activity;GO:0003674//molecular_function;GO:1901363//heterocyclic compound binding;GO:0005488//binding;GO:0036094//small molecule binding;GO:0016787//hydrolase activity	GO:1901360//organic cyclic compound metabolic process;GO:0007049//cell cycle;GO:0043170//macromolecule metabolic process;GO:0006725//cellular aromatic compound metabolic process;GO:0046483//heterocycle metabolic process;GO:0044237//cellular metabolic process;GO:0008152//metabolic process;GO:0006259//DNA metabolic process;GO:0044763//single-organism cellular process;GO:0006950//response to stress;…
Bra009959	55.03	1.01333	5.85333	0.11	-5.73368	9.4051e-16	1.24855e-13	yes	AT1G70580 (E=7e-082) AOAT2, GGT2 | AOAT2 (ALANINE-2-OXOGLUTARATE AMINOTRANSFERASE 2); L-alanine:2-oxoglutarate aminotransferase/ glycine:2-oxoglutarate aminotransferase	-	GO:0003824//catalytic activity;GO:0005488//binding;GO:0003674//molecular_function	GO:0008152//metabolic process;GO:0008150//biological_process
Bra009978	1149.67	511.333	76.93	34.2533	-1.1673	5.48433e-09	2.96803e-07	yes	-	-	-	-
Bra009980	32	12	1.88	0.7	-1.42531	0.00381781	0.0394664	yes	AT5G27950 (E=1e-279) | kinesin motor protein-related	GO:0005623//cell;GO:0044464//cell part;GO:0043226//organelle;GO:0044424//intracellular part;GO:0043232//intracellular non-membrane-bounded organelle;GO:0005856//cytoskeleton;GO:0005575//cellular_component;GO:0043228//non-membrane-bounded organelle;GO:0005622//intracellular;GO:0043229//intracellular organelle	GO:1901363//heterocyclic compound binding;GO:1901265//nucleoside phosphate binding;GO:0097159//organic cyclic compound binding;GO:0003774//motor activity;GO:0016817//hydrolase activity, acting on acid anhydrides;GO:0036094//small molecule binding;GO:0017111//nucleoside-triphosphatase activity;GO:0016787//hydrolase activity;GO:0003674//molecular_function;GO:0000166//nucleotide binding;GO:0005515//…	GO:0050896//response to stimulus;GO:0006810//transport;GO:0008152//metabolic process;GO:0071840//cellular component organization or biogenesis;GO:0044699//single-organism process;GO:0051234//establishment of localization;GO:0016265//death;GO:0016043//cellular component organization;GO:0008150//biological_process;GO:0009987//cellular process;GO:0009058//biosynthetic process;GO:0006950//response to…
Bra009990	20.3333	7	1.62667	0.536667	-1.59982	0.00388822	0.0398889	yes	AT5G28080 (E=4e-153) WNK9 | WNK9; kinase/ protein kinase	-	GO:0016301//kinase activity;GO:1901265//nucleoside phosphate binding;GO:0000166//nucleotide binding;GO:1901363//heterocyclic compound binding;GO:0003824//catalytic activity;GO:0005488//binding;GO:0016740//transferase activity;GO:0036094//small molecule binding;GO:0016772//transferase activity, transferring phosphorus-containing groups;GO:0003674//molecular_function;GO:0097159//organic cyclic comp…	GO:0044260//cellular macromolecule metabolic process;GO:0044238//primary metabolic process;GO:0071704//organic substance metabolic process;GO:0044237//cellular metabolic process;GO:0019538//protein metabolic process;GO:0044267//cellular protein metabolic process;GO:0008150//biological_process;GO:0009987//cellular process;GO:0036211//protein modification process;GO:0043412//macromolecule modificat…
Bra010009	38	17	9.4	4.23333	-1.15087	0.0025739	0.0289207	yes	AT5G28750 (E=1e-038) | thylakoid assembly protein, putative	GO:0016020//membrane;GO:0005886//plasma membrane;GO:0005575//cellular_component;GO:0005623//cell;GO:0044464//cell part;GO:0071944//cell periphery	GO:0005215//transporter activity;GO:0003674//molecular_function	GO:0051234//establishment of localization;GO:0006810//transport;GO:0009987//cellular process;GO:0051179//localization;GO:0008150//biological_process
Bra010032	130	42.6667	11.89	3.95667	-1.58739	1.3907e-05	0.00035703	yes	AT5G49520 (E=5e-137) WRKY48, ATWRKY48 | WRKY48; transcription factor	-	GO:0001071//nucleic acid binding transcription factor activity;GO:0097159//organic cyclic compound binding;GO:0003676//nucleic acid binding;GO:0003700//transcription factor activity, sequence-specific DNA binding;GO:1901363//heterocyclic compound binding;GO:0003677//DNA binding;GO:0003674//molecular_function;GO:0005488//binding	GO:0008152//metabolic process;GO:0046483//heterocycle metabolic process;GO:0006139//nucleobase-containing compound metabolic process;GO:0034641//cellular nitrogen compound metabolic process;GO:0009058//biosynthetic process;GO:0006807//nitrogen compound metabolic process;GO:0071704//organic substance metabolic process;GO:1901360//organic cyclic compound metabolic process;GO:0006725//cellular aroma…
Bra010049	91.6667	16	10.81	1.93667	-2.48072	6.31716e-05	0.00133132	yes	AT5G62020 (E=4e-105) AT-HSFB2A, HSFB2A | AT-HSFB2A; DNA binding / transcription factor	GO:0043227//membrane-bounded organelle;GO:0005622//intracellular;GO:0005575//cellular_component;GO:0005623//cell;GO:0044464//cell part;GO:0005634//nucleus;GO:0043229//intracellular organelle;GO:0044424//intracellular part;GO:0043226//organelle;GO:0043231//intracellular membrane-bounded organelle	GO:0003677//DNA binding;GO:1901363//heterocyclic compound binding;GO:0005488//binding;GO:0003676//nucleic acid binding;GO:0003700//transcription factor activity, sequence-specific DNA binding;GO:0097159//organic cyclic compound binding;GO:0001071//nucleic acid binding transcription factor activity;GO:0003674//molecular_function	GO:0044238//primary metabolic process;GO:0050896//response to stimulus;GO:0034641//cellular nitrogen compound metabolic process;GO:0009058//biosynthetic process;GO:0006950//response to stress;GO:0071704//organic substance metabolic process;GO:0008150//biological_process;GO:0006725//cellular aromatic compound metabolic process;GO:1901360//organic cyclic compound metabolic process;GO:0009628//respo…
Bra010075	140	47	24.81	8.57	-1.53355	1.97903e-06	6.23495e-05	yes	AT5G62350 (E=2e-089) | invertase/pectin methylesterase inhibitor family protein / DC 1.2 homolog (FL5-2I22)	-	GO:0003824//catalytic activity;GO:0003674//molecular_function;GO:0030234//enzyme regulator activity;GO:0098772//molecular function regulator;GO:0016787//hydrolase activity	GO:0008150//biological_process
Bra010076	41.3333	7.66667	7.47	1.44333	-2.3717	1.7198e-07	6.90231e-06	yes	AT5G62360 (E=6e-064) | invertase/pectin methylesterase inhibitor family protein	-	GO:0003674//molecular_function;GO:0003824//catalytic activity;GO:0030234//enzyme regulator activity;GO:0098772//molecular function regulator;GO:0016787//hydrolase activity	GO:0008150//biological_process
Bra010111	180.333	64	10.6533	3.84667	-1.46962	6.50081e-07	2.31584e-05	yes	AT5G62680 (E=6e-298) | proton-dependent oligopeptide transport (POT) family protein	GO:0016020//membrane;GO:0005575//cellular_component	GO:0005215//transporter activity;GO:0003674//molecular_function	GO:0051179//localization;GO:0008150//biological_process;GO:0051234//establishment of localization;GO:0006810//transport
Bra010126	68	22.3333	8.41	2.7	-1.63915	2.61512e-05	0.000621082	yes	AT5G62840 (E=2e-146) | phosphoglycerate/bisphosphoglycerate mutase family protein	-	-	GO:0044767//single-organism developmental process;GO:0048856//anatomical structure development;GO:0044238//primary metabolic process;GO:1901360//organic cyclic compound metabolic process;GO:0034641//cellular nitrogen compound metabolic process;GO:0044707//single-multicellular organism process;GO:0008150//biological_process;GO:0006807//nitrogen compound metabolic process;GO:0008152//metabolic proc…
Bra010128	5	22	0.873333	3.71667	2.0894	7.3955e-05	0.00152343	yes	AT5G62880 (E=5e-107) ARAC10, ATRAC10, ATROP11 | ARAC10; GTP binding	GO:0005622//intracellular;GO:0016020//membrane;GO:0005575//cellular_component;GO:0044464//cell part;GO:0005623//cell	GO:1901265//nucleoside phosphate binding;GO:0000166//nucleotide binding;GO:0097159//organic cyclic compound binding;GO:0003674//molecular_function;GO:1901363//heterocyclic compound binding;GO:0005488//binding;GO:0036094//small molecule binding	GO:0065007//biological regulation;GO:0044700//single organism signaling;GO:0007154//cell communication;GO:0007165//signal transduction;GO:0050896//response to stimulus;GO:0050794//regulation of cellular process;GO:0044699//single-organism process;GO:0008150//biological_process;GO:0044763//single-organism cellular process;GO:0051716//cellular response to stimulus;GO:0050789//regulation of biologic…
Bra010157	0	6	0.001	0.536667	9.06788	0.000108844	0.00212064	yes	AT2G13770 (E=2e-030) | unknown protein	-	GO:0003674//molecular_function;GO:0003824//catalytic activity;GO:0016787//hydrolase activity	-
Bra010167	46.3333	15.3333	10.1533	3.25	-1.64344	8.11781e-05	0.00165034	yes	AT1G32470 (E=6e-075) | glycine cleavage system H protein, mitochondrial, putative	GO:0044464//cell part;GO:0005737//cytoplasm;GO:0005622//intracellular;GO:0005623//cell;GO:0005575//cellular_component;GO:0044424//intracellular part	-	GO:0009056//catabolic process;GO:0009987//cellular process;GO:0008152//metabolic process;GO:0008150//biological_process
Bra010196	329	1571	6.22	29.0267	2.22239	6.31505e-24	1.60796e-21	yes	-	-	-	-
Bra010203	42	17	4.97333	2.02667	-1.2951	0.000570495	0.00850377	yes	AT1G33470 (E=1e-068) | RNA recognition motif (RRM)-containing protein	-	GO:0003676//nucleic acid binding;GO:0036094//small molecule binding;GO:0003674//molecular_function;GO:0000166//nucleotide binding;GO:0097159//organic cyclic compound binding;GO:1901265//nucleoside phosphate binding;GO:0005488//binding;GO:1901363//heterocyclic compound binding	GO:0044238//primary metabolic process;GO:0006807//nitrogen compound metabolic process;GO:0006139//nucleobase-containing compound metabolic process;GO:0008150//biological_process;GO:0034641//cellular nitrogen compound metabolic process;GO:0008152//metabolic process;GO:0044237//cellular metabolic process;GO:0006725//cellular aromatic compound metabolic process;GO:0071704//organic substance metaboli…
Bra010254	5	0.333333	2.23333	0.156667	-3.83343	0.0038671	0.0397379	yes	-	-	-	-
Bra010263	383	150	32.3733	12.7833	-1.34054	5.25818e-08	2.29733e-06	yes	AT4G30960 (E=2e-153) CIPK6, SIP3, SNRK3.14, ATCIPK6 | SIP3 (SOS3-INTERACTING PROTEIN 3); ATP binding / kinase/ protein kinase/ protein serine/threonine kinase	-	GO:0036094//small molecule binding;GO:0016740//transferase activity;GO:0016772//transferase activity, transferring phosphorus-containing groups;GO:0000166//nucleotide binding;GO:0003824//catalytic activity;GO:0005488//binding;GO:0003674//molecular_function;GO:1901265//nucleoside phosphate binding;GO:1901363//heterocyclic compound binding;GO:0097159//organic cyclic compound binding;GO:0016301//kin…	GO:0051716//cellular response to stimulus;GO:0065007//biological regulation;GO:0007154//cell communication;GO:0007165//signal transduction;GO:0044763//single-organism cellular process;GO:0043412//macromolecule modification;GO:0044700//single organism signaling;GO:0009987//cellular process;GO:0023052//signaling;GO:0050896//response to stimulus;GO:0043170//macromolecule metabolic process;GO:0050789…
Bra010274	106	46.3333	6.76	2.94	-1.20121	0.0011919	0.0154852	yes	-	-	-	-
Bra010289	25.6667	5.33333	6.12	1.30667	-2.22764	0.000356851	0.00577957	yes	AT4G30370 (E=2e-040) | zinc finger (C3HC4-type RING finger) family protein	-	GO:0005515//protein binding;GO:0003674//molecular_function;GO:0005488//binding	-
Bra010357	53	0	5.92	0.001	-12.5314	2.99772e-24	7.7601e-22	yes	-	-	-	-
Bra010399	160	533.333	43.5767	148.27	1.7666	1.69974e-05	0.000427537	yes	-	-	-	-
Bra010404	106.667	20	15.5233	2.89667	-2.42197	2.38807e-12	2.07215e-10	yes	-	-	-	-
Bra010408	91	20.6667	13.5633	3.09667	-2.13092	1.06733e-09	6.48837e-08	yes	AT4G27310 (E=1e-043) | zinc finger (B-box type) family protein	GO:0005622//intracellular;GO:0005575//cellular_component;GO:0044464//cell part;GO:0005623//cell	GO:0003674//molecular_function;GO:0005488//binding	-
Bra010485	1	40.3333	0.176667	6.59667	5.22264	8.66957e-07	2.98241e-05	yes	AT4G24660 (E=1e-038) ATHB22, MEE68 | ATHB22 (HOMEOBOX PROTEIN 22); DNA binding / transcription factor	-	GO:0097159//organic cyclic compound binding;GO:0003676//nucleic acid binding;GO:0003677//DNA binding;GO:0005488//binding;GO:0003674//molecular_function;GO:1901363//heterocyclic compound binding	-
Bra010512	0.666667	7.66667	0.0266667	0.343333	3.6865	0.00113876	0.0149197	yes	AT4G35790 (E=6e-266) ATPLDDELTA, PLDDELTA | ATPLDDELTA; phospholipase D	GO:0005575//cellular_component;GO:0016020//membrane	GO:0016787//hydrolase activity;GO:0003824//catalytic activity;GO:0005488//binding;GO:0005515//protein binding;GO:0003674//molecular_function	GO:0009056//catabolic process;GO:0006629//lipid metabolic process;GO:0044699//single-organism process;GO:0044238//primary metabolic process;GO:0008150//biological_process;GO:0044710//single-organism metabolic process;GO:0071704//organic substance metabolic process;GO:0008152//metabolic process;GO:0009987//cellular process
Bra010524	97.6667	34.6667	11.1	3.79333	-1.54902	1.83532e-05	0.000459776	yes	-	-	-	-
Bra010529	6.66667	0.333333	0.646667	0.0366667	-4.14048	0.00080113	0.0112812	yes	AT4G35600 (E=1e-143) CONNEXIN 32 | CONNEXIN 32; ATP binding / kinase/ protein kinase/ protein serine/threonine kinase	-	GO:0000166//nucleotide binding;GO:0003824//catalytic activity;GO:0016772//transferase activity, transferring phosphorus-containing groups;GO:0097159//organic cyclic compound binding;GO:1901265//nucleoside phosphate binding;GO:0005488//binding;GO:0016301//kinase activity;GO:0003674//molecular_function;GO:0016740//transferase activity;GO:0036094//small molecule binding;GO:1901363//heterocyclic comp…	GO:0036211//protein modification process;GO:0071704//organic substance metabolic process;GO:0043170//macromolecule metabolic process;GO:0009987//cellular process;GO:0043412//macromolecule modification;GO:0044237//cellular metabolic process;GO:0019538//protein metabolic process;GO:0006464//cellular protein modification process;GO:0044260//cellular macromolecule metabolic process;GO:0008152//metabo…
Bra010561	126.667	790.333	9.24333	57.54	2.63808	1.63371e-22	3.84465e-20	yes	AT4G36600 (E=6e-085) | FUNCTIONS IN: molecular_function unknown; INVOLVED IN: embryonic development ending in seed dormancy; EXPRESSED IN: 6 plant structures; EXPRESSED DURING: M germinated pollen stage, 4 anthesis, petal differentiation and expansion stage; CONTAINS InterPro DOMAIN/s: Late embryogenesis abundant protein (InterPro:IPR004238); BEST Arabidopsis thaliana protein match is: late embry…	GO:0005622//intracellular;GO:0005737//cytoplasm;GO:0043227//membrane-bounded organelle;GO:0043226//organelle;GO:0044464//cell part;GO:0012505//endomembrane system;GO:0005623//cell;GO:0044424//intracellular part;GO:0043231//intracellular membrane-bounded organelle;GO:0043229//intracellular organelle;GO:0044444//cytoplasmic part;GO:0005575//cellular_component;GO:0005783//endoplasmic reticulum	-	GO:0044767//single-organism developmental process;GO:0022414//reproductive process;GO:0061458//reproductive system development;GO:0044707//single-multicellular organism process;GO:0044702//single organism reproductive process;GO:0009908//flower development;GO:0048367//shoot system development;GO:0032502//developmental process;GO:0003006//developmental process involved in reproduction;GO:0009653//…
Bra010577	8	34.3333	0.896667	3.76333	2.06937	1.11127e-05	0.000289601	yes	AT4G36870 (E=1e-137) BLH2, SAW1 | BLH2 (BEL1-LIKE HOMEODOMAIN 2); DNA binding / transcription factor	GO:0005623//cell;GO:0043227//membrane-bounded organelle;GO:0005575//cellular_component;GO:0043229//intracellular organelle;GO:0043231//intracellular membrane-bounded organelle;GO:0043226//organelle;GO:0044424//intracellular part;GO:0005622//intracellular;GO:0044464//cell part;GO:0005634//nucleus	GO:0003700//transcription factor activity, sequence-specific DNA binding;GO:0097159//organic cyclic compound binding;GO:0001071//nucleic acid binding transcription factor activity;GO:0005488//binding;GO:0003674//molecular_function;GO:1901363//heterocyclic compound binding;GO:0003677//DNA binding;GO:0003676//nucleic acid binding	GO:0008152//metabolic process;GO:0009058//biosynthetic process;GO:0006139//nucleobase-containing compound metabolic process;GO:1901360//organic cyclic compound metabolic process;GO:0071704//organic substance metabolic process;GO:0009987//cellular process;GO:0008150//biological_process;GO:0046483//heterocycle metabolic process;GO:0006725//cellular aromatic compound metabolic process;GO:0044237//ce…
Bra010625	12.65	2.35333	1.77333	0.346667	-2.35484	0.000910492	0.0124707	yes	AT4G37980 (E=4e-104) ELI3-1, ELI3, ATCAD7, CAD7 | ELI3-1 (ELICITOR-ACTIVATED GENE 3-1); binding / catalytic/ oxidoreductase/ zinc ion binding	-	GO:0003674//molecular_function;GO:0005488//binding;GO:0003824//catalytic activity	GO:0008150//biological_process;GO:0008152//metabolic process
Bra010627	93.6667	5	10.1333	0.573333	-4.14359	1.36166e-19	2.50288e-17	yes	AT4G37990 (E=2e-143) ELI3-2, ELI3, ATCAD8, CAD-B2 | ELI3-2 (ELICITOR-ACTIVATED GENE 3-2); aryl-alcohol dehydrogenase/ mannitol dehydrogenase	-	GO:0003674//molecular_function;GO:0003824//catalytic activity;GO:0005488//binding	GO:0044710//single-organism metabolic process;GO:0006810//transport;GO:0008152//metabolic process;GO:0009987//cellular process;GO:0019748//secondary metabolic process;GO:0008150//biological_process;GO:0051234//establishment of localization;GO:0009056//catabolic process;GO:0051179//localization;GO:0044699//single-organism process
Bra010636	0.333333	15.3333	0.07	2.79667	5.32021	0.000336415	0.00548289	yes	AT4G38100 (E=3e-064) | unknown protein	GO:0043227//membrane-bounded organelle;GO:0043231//intracellular membrane-bounded organelle;GO:0043229//intracellular organelle;GO:0005623//cell;GO:0009536//plastid;GO:0044444//cytoplasmic part;GO:0005737//cytoplasm;GO:0044424//intracellular part;GO:0016020//membrane;GO:0043226//organelle;GO:0005575//cellular_component;GO:0044464//cell part;GO:0009579//thylakoid;GO:0005622//intracellular	-	-
Bra010653	143.82	47.9867	11.6733	3.75667	-1.63569	1.31218e-08	6.53229e-07	yes	-	-	-	-
Bra010657	22.6667	64.6667	3.13	9.03	1.52856	3.29286e-05	0.000754346	yes	AT4G39780 (E=8e-066) | AP2 domain-containing transcription factor, putative	GO:0043226//organelle;GO:0005634//nucleus;GO:0043231//intracellular membrane-bounded organelle;GO:0005623//cell;GO:0043229//intracellular organelle;GO:0044464//cell part;GO:0005622//intracellular;GO:0043227//membrane-bounded organelle;GO:0044424//intracellular part;GO:0005575//cellular_component	GO:0097159//organic cyclic compound binding;GO:0003674//molecular_function;GO:0003700//transcription factor activity, sequence-specific DNA binding;GO:0003677//DNA binding;GO:0003676//nucleic acid binding;GO:0001071//nucleic acid binding transcription factor activity;GO:1901363//heterocyclic compound binding;GO:0005488//binding	GO:0071704//organic substance metabolic process;GO:0008152//metabolic process;GO:0034641//cellular nitrogen compound metabolic process;GO:0044238//primary metabolic process;GO:0008150//biological_process;GO:0046483//heterocycle metabolic process;GO:0006807//nitrogen compound metabolic process;GO:1901360//organic cyclic compound metabolic process;GO:0006725//cellular aromatic compound metabolic pr…
Bra010672	158.333	426.333	11.1133	28.81	1.37428	1.02324e-06	3.45876e-05	yes	AT4G39640 (E=9e-223) GGT1 | GGT1 (GAMMA-GLUTAMYL TRANSPEPTIDASE 1); gamma-glutamyltransferase/ glutathione gamma-glutamylcysteinyltransferase	-	GO:0003824//catalytic activity;GO:0016740//transferase activity;GO:0003674//molecular_function	GO:0008150//biological_process;GO:0008152//metabolic process;GO:0009987//cellular process
Bra010717	102.88	27.0933	9.70333	2.50667	-1.95271	2.23547e-05	0.000544649	yes	AT4G38970 (E=3e-218) | fructose-bisphosphate aldolase, putative	-	GO:0003674//molecular_function;GO:0003824//catalytic activity	GO:0005975//carbohydrate metabolic process;GO:0046483//heterocycle metabolic process;GO:0071704//organic substance metabolic process;GO:0006139//nucleobase-containing compound metabolic process;GO:0008152//metabolic process;GO:0008150//biological_process;GO:0006091//generation of precursor metabolites and energy;GO:0009987//cellular process;GO:0034641//cellular nitrogen compound metabolic process…
Bra010724	3	280.333	0.126667	10.5433	6.37915	1.05688e-06	3.54928e-05	yes	AT1G73490 (E=1e-024) | RNA recognition motif (RRM)-containing protein	-	GO:0003674//molecular_function;GO:0003676//nucleic acid binding;GO:0000166//nucleotide binding;GO:1901265//nucleoside phosphate binding;GO:0016787//hydrolase activity;GO:0005488//binding;GO:1901363//heterocyclic compound binding;GO:0036094//small molecule binding;GO:0097159//organic cyclic compound binding;GO:0003824//catalytic activity	GO:0019538//protein metabolic process;GO:0008152//metabolic process;GO:0044238//primary metabolic process;GO:0071704//organic substance metabolic process;GO:0008150//biological_process;GO:0043170//macromolecule metabolic process
Bra010768	1.66667	20	0.196667	2.28	3.53521	0.00016947	0.00308402	yes	-	-	-	-
Bra010780	0.666667	16	0.0533333	1.29667	4.60363	4.7051e-05	0.0010322	yes	-	-	-	-
Bra010787	47.6667	174.667	7.28333	25.77	1.82302	7.03197e-05	0.00145822	yes	AT1G30230 (E=3e-091) | elongation factor 1-beta / EF-1-beta	GO:0044424//intracellular part;GO:0044464//cell part;GO:0005623//cell;GO:0005737//cytoplasm;GO:0005622//intracellular;GO:0005575//cellular_component	GO:0008135//translation factor activity, RNA binding;GO:0097159//organic cyclic compound binding;GO:0003674//molecular_function;GO:0005488//binding;GO:0003723//RNA binding;GO:1901363//heterocyclic compound binding;GO:0003676//nucleic acid binding	GO:0043604//amide biosynthetic process;GO:0034641//cellular nitrogen compound metabolic process;GO:1901564//organonitrogen compound metabolic process;GO:1901566//organonitrogen compound biosynthetic process;GO:0008152//metabolic process;GO:0044260//cellular macromolecule metabolic process;GO:0044249//cellular biosynthetic process;GO:0071704//organic substance metabolic process;GO:0034645//cellula…
Bra010788	85	33.6667	6.27	2.41667	-1.37545	0.00113733	0.0149072	yes	AT1G30220 (E=3e-248) ATINT2, INT2 | INT2 (INOSITOL TRANSPORTER 2); carbohydrate transmembrane transporter/ sugar:hydrogen symporter	GO:0005886//plasma membrane;GO:0016020//membrane;GO:0005575//cellular_component;GO:0005623//cell;GO:0044464//cell part;GO:0071944//cell periphery	GO:0003674//molecular_function;GO:0005215//transporter activity	GO:0051234//establishment of localization;GO:0009987//cellular process;GO:0051179//localization;GO:0006810//transport;GO:0008150//biological_process
Bra010791	2.33333	20.3333	0.253333	2	2.98089	0.000398758	0.00634906	yes	-	-	-	-
Bra010793	7	27	0.7	2.57333	1.87821	0.000173085	0.00313694	yes	-	-	-	-
Bra010807	102.93	28.97	14.3167	3.88	-1.88357	0.000277078	0.00468035	yes	AT1G29920 (E=1e-149) CAB2, AB165, LHCB1.1 | CAB2 (CHLOROPHYLL A/B-BINDING PROTEIN 2); chlorophyll binding	GO:0044464//cell part;GO:0043227//membrane-bounded organelle;GO:0005575//cellular_component;GO:0005622//intracellular;GO:0016020//membrane;GO:0005737//cytoplasm;GO:0009536//plastid;GO:0044424//intracellular part;GO:0044444//cytoplasmic part;GO:0009579//thylakoid;GO:0043226//organelle;GO:0005623//cell;GO:0043229//intracellular organelle;GO:0043231//intracellular membrane-bounded organelle	GO:0005488//binding;GO:0003674//molecular_function	GO:0006464//cellular protein modification process;GO:0071704//organic substance metabolic process;GO:0036211//protein modification process;GO:0044267//cellular protein metabolic process;GO:0044238//primary metabolic process;GO:0043170//macromolecule metabolic process;GO:0008152//metabolic process;GO:0019538//protein metabolic process;GO:0044260//cellular macromolecule metabolic process;GO:0006091…
Bra010880	45	106	9.23667	22.1	1.2586	0.00295558	0.0323427	yes	AT1G28370 (E=4e-040) ERF11, ATERF11 | ERF11 (ERF DOMAIN PROTEIN 11); DNA binding / transcription factor/ transcription repressor	GO:0044424//intracellular part;GO:0043227//membrane-bounded organelle;GO:0043231//intracellular membrane-bounded organelle;GO:0043226//organelle;GO:0005634//nucleus;GO:0005622//intracellular;GO:0005623//cell;GO:0044464//cell part;GO:0005575//cellular_component;GO:0043229//intracellular organelle	GO:0097159//organic cyclic compound binding;GO:0003700//transcription factor activity, sequence-specific DNA binding;GO:0003677//DNA binding;GO:1901363//heterocyclic compound binding;GO:0003676//nucleic acid binding;GO:0001071//nucleic acid binding transcription factor activity;GO:0003674//molecular_function;GO:0005488//binding	GO:0034641//cellular nitrogen compound metabolic process;GO:0046483//heterocycle metabolic process;GO:1901360//organic cyclic compound metabolic process;GO:0009987//cellular process;GO:0006139//nucleobase-containing compound metabolic process;GO:0009058//biosynthetic process;GO:0008150//biological_process;GO:0071704//organic substance metabolic process;GO:0044237//cellular metabolic process;GO:00…
Bra010895	23	6.33333	6.91333	1.83333	-1.91491	0.00117668	0.0153067	yes	AT1G02250 (E=1e-007) anac005 | anac005 (Arabidopsis NAC domain containing protein 5); transcription factor	GO:0043231//intracellular membrane-bounded organelle;GO:0005634//nucleus;GO:0043227//membrane-bounded organelle;GO:0044464//cell part;GO:0043229//intracellular organelle;GO:0044424//intracellular part;GO:0043226//organelle;GO:0005622//intracellular;GO:0005575//cellular_component;GO:0005623//cell	GO:0003676//nucleic acid binding;GO:0005488//binding;GO:0003677//DNA binding;GO:0097159//organic cyclic compound binding;GO:0003674//molecular_function;GO:1901363//heterocyclic compound binding	GO:0009987//cellular process;GO:1901360//organic cyclic compound metabolic process;GO:0044238//primary metabolic process;GO:0009058//biosynthetic process;GO:0008152//metabolic process;GO:0008150//biological_process;GO:0006807//nitrogen compound metabolic process;GO:0046483//heterocycle metabolic process;GO:0071704//organic substance metabolic process;GO:0006139//nucleobase-containing compound met…
Bra010961	37.6667	13.3333	8.26667	3.02333	-1.45117	0.000399765	0.00635857	yes	-	-	-	-
Bra011037	80.6667	29	8.61333	3.09667	-1.47586	9.64085e-05	0.00190856	yes	AT4G28530 (E=3e-167) anac074 | anac074 (Arabidopsis NAC domain containing protein 74); transcription factor	GO:0005575//cellular_component;GO:0005634//nucleus;GO:0043231//intracellular membrane-bounded organelle;GO:0005622//intracellular;GO:0043226//organelle;GO:0044424//intracellular part;GO:0043229//intracellular organelle;GO:0043227//membrane-bounded organelle;GO:0005623//cell;GO:0044464//cell part	GO:1901363//heterocyclic compound binding;GO:0005488//binding;GO:0003676//nucleic acid binding;GO:0003674//molecular_function;GO:0003677//DNA binding;GO:0097159//organic cyclic compound binding	GO:0034641//cellular nitrogen compound metabolic process;GO:0006725//cellular aromatic compound metabolic process;GO:0009987//cellular process;GO:0044238//primary metabolic process;GO:0008152//metabolic process;GO:0006139//nucleobase-containing compound metabolic process;GO:0009058//biosynthetic process;GO:0046483//heterocycle metabolic process;GO:1901360//organic cyclic compound metabolic proces…
Bra011066	8.66667	0.333333	1.05667	0.0466667	-4.50098	7.7162e-05	0.00157799	yes	AT4G28850 (E=2e-152) | xyloglucan:xyloglucosyl transferase, putative / xyloglucan endotransglycosylase, putative / endo-xyloglucan transferase, putative	GO:0071944//cell periphery;GO:0005623//cell;GO:0044464//cell part;GO:0005575//cellular_component;GO:0005618//cell wall;GO:0030312//external encapsulating structure;GO:0005576//extracellular region	GO:0003824//catalytic activity;GO:0016740//transferase activity;GO:0003674//molecular_function;GO:0016787//hydrolase activity	GO:0008152//metabolic process;GO:0071840//cellular component organization or biogenesis;GO:0044238//primary metabolic process;GO:0071704//organic substance metabolic process;GO:0008150//biological_process;GO:0009987//cellular process;GO:0005975//carbohydrate metabolic process;GO:0016043//cellular component organization
Bra011181	22	7	2.82667	0.873333	-1.6945	0.000813559	0.0113909	yes	AT1G65310 (E=4e-139) ATXTH17, XTH17 | XTH17 (XYLOGLUCAN ENDOTRANSGLUCOSYLASE/HYDROLASE 17); hydrolase, acting on glycosyl bonds / hydrolase, hydrolyzing O-glycosyl compounds / xyloglucan:xyloglucosyl transferase	GO:0071944//cell periphery;GO:0005575//cellular_component;GO:0044464//cell part;GO:0005618//cell wall;GO:0030312//external encapsulating structure;GO:0005576//extracellular region;GO:0005623//cell	GO:0003674//molecular_function;GO:0003824//catalytic activity;GO:0016740//transferase activity;GO:0016787//hydrolase activity	GO:0071840//cellular component organization or biogenesis;GO:0008152//metabolic process;GO:0044238//primary metabolic process;GO:0008150//biological_process;GO:0071704//organic substance metabolic process;GO:0005975//carbohydrate metabolic process;GO:0016043//cellular component organization;GO:0009987//cellular process
Bra011194	246	536	20.7067	45.9133	1.14882	4.35003e-06	0.000125352	yes	AT4G30440 (E=4e-229) GAE1 | GAE1 (UDP-D-GLUCURONATE 4-EPIMERASE 1); UDP-glucuronate 4-epimerase/ catalytic	-	GO:0005488//binding;GO:0003824//catalytic activity;GO:0003674//molecular_function	GO:0008150//biological_process;GO:0071704//organic substance metabolic process;GO:0044238//primary metabolic process;GO:0005975//carbohydrate metabolic process;GO:0008152//metabolic process;GO:0009987//cellular process
Bra011210	113.667	51	15.24	6.91333	-1.14041	4.38782e-05	0.00096944	yes	-	-	-	-
Bra011212	51.6833	104.477	2.33	4.8	1.0427	0.00168336	0.0204344	yes	AT4G30700 (E=1e-276) | pentatricopeptide (PPR) repeat-containing protein	-	GO:0005515//protein binding;GO:0003674//molecular_function;GO:0005488//binding	-
Bra011223	190	68.3333	14.3867	5.13	-1.4877	1.55935e-08	7.61632e-07	yes	AT4G30810 (E=1e-235) scpl29 | scpl29 (serine carboxypeptidase-like 29); serine-type carboxypeptidase	-	GO:0003824//catalytic activity;GO:0003674//molecular_function;GO:0016787//hydrolase activity	GO:0008150//biological_process;GO:0044238//primary metabolic process;GO:0043170//macromolecule metabolic process;GO:0071704//organic substance metabolic process;GO:0019538//protein metabolic process;GO:0008152//metabolic process
Bra011228	120.333	31.3333	12.1833	3.25667	-1.90344	1.81422e-06	5.79802e-05	yes	AT4G30850 (E=1e-174) HHP2 | HHP2 (HEPTAHELICAL TRANSMEMBRANE PROTEIN2); receptor	GO:0016020//membrane;GO:0005575//cellular_component	-	-
Bra011268	180	81.3333	10.8133	4.94	-1.13023	2.30855e-06	7.14984e-05	yes	AT4G31390 (E=0.0) | ABC1 family protein	GO:0005622//intracellular;GO:0043231//intracellular membrane-bounded organelle;GO:0005623//cell;GO:0005737//cytoplasm;GO:0044464//cell part;GO:0005575//cellular_component;GO:0043226//organelle;GO:0009536//plastid;GO:0044444//cytoplasmic part;GO:0044424//intracellular part;GO:0043229//intracellular organelle;GO:0043227//membrane-bounded organelle	GO:1901265//nucleoside phosphate binding;GO:0036094//small molecule binding;GO:0097159//organic cyclic compound binding;GO:0003674//molecular_function;GO:0016740//transferase activity;GO:0005488//binding;GO:0003824//catalytic activity;GO:0016772//transferase activity, transferring phosphorus-containing groups;GO:1901363//heterocyclic compound binding;GO:0016301//kinase activity;GO:0000166//nucleo…	GO:0044267//cellular protein metabolic process;GO:0009056//catabolic process;GO:0009987//cellular process;GO:0044238//primary metabolic process;GO:0006950//response to stress;GO:0050896//response to stimulus;GO:0043412//macromolecule modification;GO:0008152//metabolic process;GO:0071704//organic substance metabolic process;GO:0043170//macromolecule metabolic process;GO:0019538//protein metabolic …
Bra011271	58	153	4.05667	10.63	1.38977	8.28288e-08	3.50067e-06	yes	-	-	-	-
Bra011280	21.3333	2.33333	1.54333	0.166667	-3.21101	1.48635e-06	4.83477e-05	yes	AT1G13080 (E=5e-202) CYP71B2 | CYP71B2 (CYTOCHROME P450 71B2); electron carrier/ heme binding / iron ion binding / monooxygenase/ oxygen binding	-	GO:0003674//molecular_function;GO:0003824//catalytic activity;GO:0005488//binding	GO:0008150//biological_process;GO:0008152//metabolic process
Bra011290	92.3333	395.333	5.50667	23.2	2.07487	5.22581e-20	9.86982e-18	yes	AT4G31670 (E=4e-263) UBP18 | UBP18 (UBIQUITIN-SPECIFIC PROTEASE 18); cysteine-type endopeptidase/ ubiquitin thiolesterase	-	GO:0003674//molecular_function;GO:0016787//hydrolase activity;GO:0003824//catalytic activity;GO:0005488//binding	GO:0043170//macromolecule metabolic process;GO:0036211//protein modification process;GO:0019538//protein metabolic process;GO:0008150//biological_process;GO:0009987//cellular process;GO:0009056//catabolic process;GO:0044237//cellular metabolic process;GO:0008152//metabolic process;GO:0044238//primary metabolic process;GO:0044260//cellular macromolecule metabolic process;GO:0044267//cellular prote…
Bra011299	196	49.3333	22.75	5.65667	-2.00784	4.44301e-07	1.62565e-05	yes	AT4G31800 (E=2e-122) WRKY18, ATWRKY18 | WRKY18; transcription factor	-	GO:0003674//molecular_function;GO:0003700//transcription factor activity, sequence-specific DNA binding;GO:0001071//nucleic acid binding transcription factor activity;GO:0005488//binding;GO:0003676//nucleic acid binding;GO:1901363//heterocyclic compound binding;GO:0003677//DNA binding;GO:0097159//organic cyclic compound binding	GO:0006725//cellular aromatic compound metabolic process;GO:0071704//organic substance metabolic process;GO:0046483//heterocycle metabolic process;GO:0008152//metabolic process;GO:0006807//nitrogen compound metabolic process;GO:0009987//cellular process;GO:0044237//cellular metabolic process;GO:0008150//biological_process;GO:1901360//organic cyclic compound metabolic process;GO:0044238//primary m…
Bra011382	7	0	0.6	0.001	-9.22882	5.34905e-05	0.00114992	yes	AT4G32780 (E=8e-110) | phosphoinositide binding	-	GO:0005488//binding;GO:0003674//molecular_function;GO:0008289//lipid binding	-
Bra011490	10	0.333333	0.756667	0.0266667	-4.82655	0.000127118	0.00241221	yes	AT4G34131 (E=2e-204) UGT73B3 | UGT73B3 (UDP-glucosyl transferase 73B3); UDP-glycosyltransferase/ abscisic acid glucosyltransferase/ quercetin 3-O-glucosyltransferase/ transferase, transferring hexosyl groups	-	GO:0016740//transferase activity;GO:0003674//molecular_function;GO:0003824//catalytic activity	GO:0008152//metabolic process;GO:0008150//biological_process
Bra011500	74.6667	28	10.28	4.01	-1.35817	0.000824183	0.011491	yes	AT4G34150 (E=2e-070) | C2 domain-containing protein	-	GO:0003674//molecular_function;GO:0005515//protein binding;GO:0005488//binding	-
[truncated: 1,784 more rows]
