# Supplementary material for: Comparative transcriptome and flavonoids components analysis reveal the structural genes responsible for the yellow seed coat color of Brassica rapa L
Source: PeerJ. 2021 Mar 4;9:e10770. doi: 10.7717/peerj.10770 (PMC7937345; doi:10.7717/peerj.10770)
Supplement: Supplemental Information 14 [file peerj-09-10770-s014.xlsx]

## Sheet: Sheet1
id	B147-0-10_fpkm	B147-2-10_fpkm	B147-3-10_fpkm	B147-0-14_fpkm	B147-2-14_fpkm	B147-3-14_fpkm	B147-0-28_fpkm	B147-2-28_fpkm	B147-3-28_fpkm	B80-0-10_fpkm	B80-4-10_fpkm	B80-5-10_fpkm	B80-0-14_fpkm	B80-4-14_fpkm	B80-5-14_fpkm	B80-0-28_fpkm	B80-4-28_fpkm	B80-5-28_fpkm	Description
Bra003126	37.32	56.85	48.07	196.34	349.04	231.53	10.85	9.52	12.76	22.34	22.77	29.55	29.88	22.93	45.74	2.46	3.5	3.65	AT3G53260 (E=0.0) PAL2, ATPAL2 | PAL2; phenylalanine ammonia-lyase
Bra006985	35.6	31.84	34.85	107.52	179.05	159.88	69.58	55.69	72.64	24.18	22.43	28.31	25.4	24.94	32.88	36.19	56.73	36.68	AT3G53260 (E=0.0) PAL2, ATPAL2 | PAL2; phenylalanine ammonia-lyase
Bra039777	31.08	22.51	27.23	38.76	63.89	53.9	27.76	20.03	28.4	25.56	33.88	44.93	21.37	15.05	22.84	13.85	22.29	16.8	AT3G53260 (E=4e-169) PAL2, ATPAL2 | PAL2; phenylalanine ammonia-lyase
Bra005221	17.76	26.37	24.89	313.28	608.25	448.39	63.23	49	60.17	12.45	11.67	19.7	23.16	19.47	41.71	29.54	52.04	16.81	AT2G37040 (E=6e-113) pal1, ATPAL1 | pal1 (Phe ammonia lyase 1); phenylalanine ammonia-lyase
Bra017210	37.3	36.65	37.73	170.17	304.93	305.71	33.08	21.47	29.46	72.55	85.38	90.58	80.59	53.21	64.92	14.34	29.18	12.17	AT2G37040 (E=0.0) pal1, ATPAL1 | pal1 (Phe ammonia lyase 1); phenylalanine ammonia-lyase
Bra004109	2.35	2.09	1.77	48.79	95.69	71.94	7.29	3.66	6.89	0.22	0.4	0.9	0.46	0.72	0.38	7.99	13.33	9.96	AT1G65060 (E=1e-253) 4CL3 | 4CL3; 4-coumarate-CoA ligase
Bra001819	11.8	9.02	7.73	17.89	25.16	29.21	3.25	3.83	4.17	20.45	19.48	24.51	37.39	30.97	33.93	3.09	5.91	2.83	AT3G21230 (E=7e-258) 4CL5 | 4CL5 (4-coumarate:CoA ligase 5); 4-coumarate-CoA ligase
Bra001820	19.7	24.08	24.79	24.15	20.85	9.94	0.92	0.85	1.43	19.44	16.93	21.27	16.89	9.9	15.09	1.7	3.85	3.49	AT3G21230 (E=2e-132) 4CL5 | 4CL5 (4-coumarate:CoA ligase 5); 4-coumarate-CoA ligase
Bra031263	32.63	31.43	29.56	11.79	15.49	7.36	0.45	0.6	0.29	8.14	8.39	11.36	10.09	5.99	6.89	0.56	0.93	0.6	AT3G21230 (E=6e-244) 4CL5 | 4CL5 (4-coumarate:CoA ligase 5); 4-coumarate-CoA ligase
Bra030429	24.35	30.17	37.13	73.88	94.16	95.34	78.18	62.78	63.38	19.49	18.34	23.39	38.1	23.71	26.44	60.3	84.64	68.98	AT1G51680 (E=7e-274) 4CL1, 4CL.1, AT4CL1 | 4CL1 (4-COUMARATE:COA LIGASE 1); 4-coumarate-CoA ligase
Bra018311	9.4	13.75	14.23	131.92	177.06	210.01	62.88	58.26	56.4	4.05	5.86	4.77	12.48	14.45	13.32	26.21	36.72	26.53	AT2G30490 (E=3e-256) ATC4H, C4H, CYP73A5 | C4H (CINNAMATE-4-HYDROXYLASE); trans-cinnamate 4-monooxygenase
Bra022802	0.14	0.24	0	0.29	0.16	0	0	0.07	0	0.73	1.76	0.75	0.68	0.67	1.06	0	0	0	AT2G30490 (E=7e-243) ATC4H, C4H, CYP73A5 | C4H (CINNAMATE-4-HYDROXYLASE); trans-cinnamate 4-monooxygenase
Bra022803	13.84	20.82	18.87	182.6	259.45	271.11	26.4	18.14	37.99	5.99	4.38	6	8.01	7.29	8.18	9.48	9.27	6.26	AT2G30490 (E=5e-255) ATC4H, C4H, CYP73A5 | C4H (CINNAMATE-4-HYDROXYLASE); trans-cinnamate 4-monooxygenase
Bra021636	6.53	10.41	3.5	12.33	13.25	8.4	15.97	14.71	10.58	2.83	1.58	3.84	1.69	0.6	1.2	0.92	1.17	2.47	AT2G30490 (E=5e-231) ATC4H, C4H, CYP73A5 | C4H (CINNAMATE-4-HYDROXYLASE); trans-cinnamate 4-monooxygenase
Bra021637	19.51	16.61	21.39	128.82	187	211.77	14.97	9.63	12.48	13.77	16.19	20.8	25.88	17.9	17.2	7.51	11.17	5.19	AT2G30490 (E=2e-256) ATC4H, C4H, CYP73A5 | C4H (CINNAMATE-4-HYDROXYLASE); trans-cinnamate 4-monooxygenase
Bra006224	29.26	37.88	58.56	456.92	1342.84	1108.49	5.97	5.72	13.29	0.21	0.11	0.24	0.64	0.08	0.09	5.33	6.14	4.1	AT5G13930 (E=2e-216) CHS, TT4, ATCHS | TT4 (TRANSPARENT TESTA 4); naringenin-chalcone synthase
Bra008792	128.41	159.1	184.65	1747.54	3190.36	2589.34	68.83	48.9	96.89	17.9	24.15	23.25	16.8	7.88	8.65	5.9	11.01	7.05	AT5G13930 (E=4e-219) CHS, TT4, ATCHS | TT4 (TRANSPARENT TESTA 4); naringenin-chalcone synthase
Bra023441	147.2	164.59	217.73	1612.89	2859.97	2474.24	42.64	21.72	68.2	14.52	15.7	18.32	11.77	5.69	6.41	3.78	11.32	6.33	AT5G13930 (E=1e-213) CHS, TT4, ATCHS | TT4 (TRANSPARENT TESTA 4); naringenin-chalcone synthase
Bra003209	4.14	1.41	6.32	8.96	24.74	21.5	7.72	6.3	12.62	8.09	12.04	10.58	5.8	2.06	3.13	9.83	9.07	9.14	AT3G55120 (E=2e-090) TT5, A11, CFI | TT5 (TRANSPARENT TESTA 5); chalcone isomerase
Bra007142	22.18	19.78	26.13	106.97	92.13	166.36	9.4	7.55	7.14	5.69	7.56	4.6	5.25	2.13	0.71	3.71	5.72	3.47	AT3G55120 (E=2e-107) TT5, A11, CFI | TT5 (TRANSPARENT TESTA 5); chalcone isomerase
Bra007145	9.07	10.32	6.72	35.26	32.29	44.91	1.08	0.11	1.07	0.55	0	0.21	0	0	0.12	0	0.12	0	AT3G55120 (E=1e-043) TT5, A11, CFI | TT5 (TRANSPARENT TESTA 5); chalcone isomerase
Bra036828	336.77	365.22	405.08	1017.27	1845.52	1331.43	33.61	17.85	51.77	128.98	151.11	157.55	86.74	67.92	73.72	9.11	18.83	11.38	AT3G51240 (E=5e-197) F3H, TT6, F3'H | F3H (FLAVANONE 3-HYDROXYLASE); naringenin 3-dioxygenase
Bra009312	314.68	371.36	474.59	815.66	1177.16	735.32	17.39	13.37	27.87	170.24	193.57	237.28	280.43	167.5	266.81	9.24	12.48	7.08	AT5G07990 (E=4e-244) TT7, CYP75B1, D501 | TT7 (TRANSPARENT TESTA 7); flavonoid 3'-monooxygenase/ oxygen binding
Bra009358	14.86	17.78	20.51	22.41	14.43	9.97	98.35	111.35	119.07	25.78	31.93	30.76	48.86	40.81	53.55	47.95	67.53	56.78	AT5G08640 (E=1e-174) FLS | FLS (FLAVONOL SYNTHASE); flavonol synthase
Bra037747	0	1.28	0.65	5.79	4.28	3.16	0.11	0.21	0.13	0.52	0.14	0.1	0.81	1.17	1.02	0.1	0.23	0.13	AT5G08640 (E=6e-101) FLS | FLS (FLAVONOL SYNTHASE); flavonol synthase
Bra027457	212.98	279.26	216.73	503.86	523.72	1803.37	188.29	92.89	254.2	0.42	0	0.57	0.55	0.87	0.18	0.65	0.29	0.54	AT5G42800 (E=3e-194) DFR, TT3, M318 | DFR (DIHYDROFLAVONOL 4-REDUCTASE); dihydrokaempferol 4-reductase
Bra013652	138.11	148.84	151.19	683.9	701.89	1378.53	41.01	23.25	64.01	0.34	0.37	0.79	0.71	0.28	0.4	0.52	0.62	0.7	AT4G22880 (E=3e-184) LDOX, TDS4, TT18, ANS | LDOX (LEUCOANTHOCYANIDIN DIOXYGENASE); leucocyanidin oxygenase
Bra019350	153.8	167	169.77	530.03	686.27	942.07	19.56	14.55	33.49	0.69	0.62	0.35	0.48	0.47	1.2	0.17	0.31	0.58	AT4G22880 (E=2e-182) LDOX, TDS4, TT18, ANS | LDOX (LEUCOANTHOCYANIDIN DIOXYGENASE); leucocyanidin oxygenase
Bra021318	64.93	86.92	84.68	259.44	150.02	518.15	13.6	8.01	16.52	0.24	0.13	0	0.12	0.1	0.1	0.27	0.11	0.12	AT1G61720 (E=7e-151) BAN | BAN (BANYULS); oxidoreductase
Bra031403	193.04	239.11	251.27	640.43	321.8	1940.65	70.87	35.45	86.77	0.24	0.52	0.28	0.5	0.49	0.42	0.28	0.44	0.12	AT1G61720 (E=3e-143) BAN | BAN (BANYULS); oxidoreductase
